# Supplementary material for: Food Compass 2.0 is an improved nutrient profiling system to characterize healthfulness of foods and beverages
Source: PubMed Central journal article supplement (PMC11578874; doi:10.1038/s43016-024-01053-3), 2024-10-08
Supplement: 43016_2024_1053_MOESM1_ESM.pdf [file 43016_2024_1053_MOESM1_ESM.pdf]

# **Food Compass 2.0 is an improved nutrient profiling system to characterize healthfulness of foods and beverages**

---

In the format provided by the authors and unedited

---

**Table S1. Updates to the Food Compass algorithm (Food Compass 2.0)**

| <b>Domain affected</b> | <b>Updated approach (FCS 2.0)</b>                                                                                                                                                                                                                                                                                                 | <b>Previous approach</b>                                                                                                                                                                                                                                            | <b>Rationale</b>                                                                                                                                                                                                                                                        |
|------------------------|-----------------------------------------------------------------------------------------------------------------------------------------------------------------------------------------------------------------------------------------------------------------------------------------------------------------------------------|---------------------------------------------------------------------------------------------------------------------------------------------------------------------------------------------------------------------------------------------------------------------|-------------------------------------------------------------------------------------------------------------------------------------------------------------------------------------------------------------------------------------------------------------------------|
| Nutrient Ratio         | Dairy products (yogurt, cheeses, milk, and dairy fats) are given half weight for the scoring of the Unsaturated: saturated fat ratio attribute.                                                                                                                                                                                   | All products are given full weight for the scoring of the Unsaturated: saturated fat ratio attribute.                                                                                                                                                               | Lack of meaningful evidence in long-term epidemiologic cohorts or interventional studies for harms of dairy fat as opposed to other animal fats.                                                                                                                        |
| Food-based ingredients | Refined carbohydrate (encompassing refined grains <i>and</i> added sugars) is included as an attribute.                                                                                                                                                                                                                           | Refined grain is included as an attribute.                                                                                                                                                                                                                          | To achieve stronger penalising of foods and beverages high in added sugar.                                                                                                                                                                                              |
| Food-based ingredients | Fruit and vegetable juices are no longer scored as attributes.                                                                                                                                                                                                                                                                    | Fruit and vegetable juices are included as attributes but are half-weighted.                                                                                                                                                                                        | Equivocal evidence for health associations of juice consumption compared to whole fruit and vegetables.                                                                                                                                                                 |
| Additives              | The low score target (i.e., maximum negative points scorable) for the added sugars attribute is assigned to products with $\geq 60\%$ of kilocalories from added sugars.                                                                                                                                                          | The low score target (i.e., maximum negative points scorable) for the added sugars attribute is assigned to products with 100% of kilocalories from added sugars.                                                                                                   | To achieve stronger penalising of foods and beverages high in added sugar.                                                                                                                                                                                              |
| Additives              | For products where ingredient data were available, artificial sweeteners/flavors/colors, partially hydrogenated oils, interesterified or hydrogenated oils, high fructose corn syrup and monosodium glutamate were scored as attributes. Each attribute was scored as “present” (-1) or “not present” (0) on the ingredient list. | Artificial sweeteners/flavors/colors, partially hydrogenated oils, interesterified or hydrogenated oils, high fructose corn syrup and monosodium glutamate were not scored within the Food Compass.                                                                 | Improved data collection methods. We can now score these attributes for a subset of products within the Food and Nutrient Database for Dietary Studies (FNDDS) that include brand information. Using this information, we sourced ingredients lists for these products. |
| Processing             | Points allocated to products within the NOVA attribute is as follows:<br>NOVA group 1 (minimally or unprocessed): 10 points<br>NOVA group 2 (culinary ingredients): 7.5 points<br>NOVA group 3 (processed): 5 points<br>NOVA group 4 (ultra-processed): -10 points                                                                | Points allocated to products within the NOVA attribute is as follows:<br>NOVA group 1 (minimally or unprocessed): 0 points<br>NOVA group 2 (culinary ingredients): -2.5 points<br>NOVA group 3 (processed): -5 points<br>NOVA group 4 (ultra-processed): -10 points | In order to emphasise the relevance of ultra-processing more strongly within the FCS and improve differentiation between foods based on level of processing.                                                                                                            |
| Specific lipids        | Only long-chain omega-3's and trans fats receive a full weight; other specific lipids                                                                                                                                                                                                                                             | All specific lipids receive a full weight. The domain receives a half-weight.                                                                                                                                                                                       | The scientific evidence for health impacts of long-chain omega-3's                                                                                                                                                                                                      |

|                   |                                                                                                |                                     |                                                                                                                                                                                   |
|-------------------|------------------------------------------------------------------------------------------------|-------------------------------------|-----------------------------------------------------------------------------------------------------------------------------------------------------------------------------------|
|                   | receive a half weight. The domain receives a half-weight.                                      |                                     | and trans fats is considerably greater than for ALA, MCFAs or dietary cholesterol.                                                                                                |
| Fiber and protein | Full weight is given to the domain, but within the domain protein is only given a half weight. | Half weight is given to the domain. | Dietary fiber is strongly related to numerous health outcomes, and with stronger relative evidence than for total protein which generally has mixed or even harmful associations. |

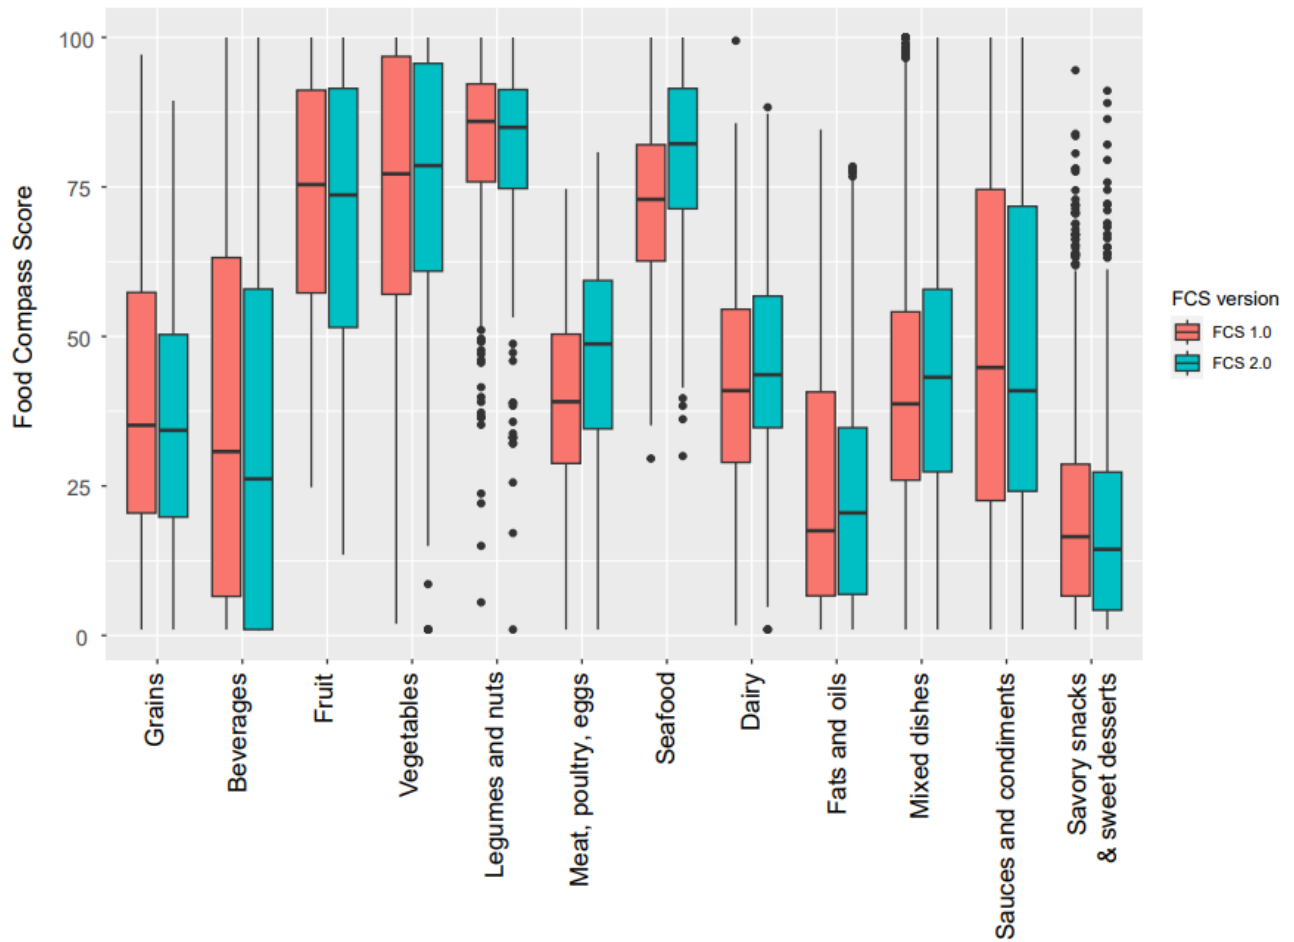

**Figure S1. Updated (blue) and original (red) Food Compass Scores (FCS) for 9273 products consumed by US adults based on NHANES 2001/02-2017-18, across 12 major food categories.** Standard box plots are shown, with horizontal lines representing the median value, bounds of boxes representing the 25<sup>th</sup> (lower bound) and 75<sup>th</sup> (upper bound) percentile values, whiskers representing 1.5\*interquartile range from the 25<sup>th</sup> percentile (for the lower whisker) and the 75<sup>th</sup> percentile (for the upper whisker), and the black dots beyond these bounds representing outliers. Meat includes beef, pork, lamb and game, organ meats, and cured meat.

**Table S2. Food Compass scores for 9273 unique foods and beverages consumed by US adults (NHANES 01/02-17/18), overall and within 12 major food groups**

|                                  | n    | Original FCS mean $\pm$ SD | FCS 2.0 mean $\pm$ SD | Change | Original FCS median (IQR) | FCS 2.0 median (IQR) | Change |
|----------------------------------|------|----------------------------|-----------------------|--------|---------------------------|----------------------|--------|
| <b>Overall</b>                   | 9273 | 45.8 $\pm$ 27.7            | 47.3 $\pm$ 27.9       | +1.5   | 43.6 (24.3-65.3)          | 46.9 (24.7-67.4)     | +3.3   |
| Beverages                        | 409  | 36.6 $\pm$ 30.3            | 32.1 $\pm$ 28.7       | -4.5   | 30.8 (6.5-63.2)           | 26.2 (1.0-57.9)      | -4.6   |
| Grains                           | 1005 | 38.1 $\pm$ 22.3            | 35.7 $\pm$ 20.0       | -2.4   | 35.2 (20.5-57.4)          | 34.3 (19.8-50.3)     | -0.9   |
| Fruit                            | 242  | 72.7 $\pm$ 20.3            | 70.5 $\pm$ 22.8       | -2.2   | 75.4 (57.2-91.2)          | 73.7 (51.5-91.5)     | -1.7   |
| Vegetables                       | 1468 | 74.7 $\pm$ 21.9            | 76.2 $\pm$ 20.5       | +1.5   | 77.3 (57.1-97.0)          | 78.7 (61.0-95.8)     | +1.4   |
| Legumes and nuts                 | 312  | 81.7 $\pm$ 16.0            | 80.8 $\pm$ 15.8       | -0.9   | 86.0 (75.8-92.2)          | 84.9 (74.7-91.3)     | -1.1   |
| Meat* poultry eggs               | 1069 | 36.2 $\pm$ 17.6            | 44.1 $\pm$ 19.4       | +7.9   | 39.1 (28.8-50.4)          | 48.7 (34.6-59.4)     | +9.6   |
| Seafood                          | 330  | 71.8 $\pm$ 14.0            | 80.5 $\pm$ 13.8       | +8.7   | 72.9 (62.5-82.1)          | 82.2 (71.3-91.5)     | +9.3   |
| Dairy                            | 319  | 42.3 $\pm$ 17.6            | 44.6 $\pm$ 16.9       | +2.3   | 40.5 (28.4-54.4)          | 43.2 (34.6-56.4)     | +2.7   |
| Fats and oils                    | 178  | 26.6 $\pm$ 24.3            | 24.9 $\pm$ 22.0       | -1.7   | 18.0 (6.5-40.8)           | 20.6 (6.9-35.6)      | +2.6   |
| Mixed dishes                     | 2551 | 41.0 $\pm$ 20.6            | 44.0 $\pm$ 21.0       | +3.0   | 38.7 (26.0-54.1)          | 43.2 (27.4-57.9)     | +4.5   |
| Sauces and condiments            | 196  | 47.8 $\pm$ 29.1            | 47.0 $\pm$ 28.0       | -0.8   | 44.8 (22.5-74.8)          | 40.9 (24.1-71.8)     | -3.9   |
| Savory snacks and sweet desserts | 1194 | 20.4 $\pm$ 17.7            | 18.4 $\pm$ 16.9       | -2.0   | 16.5 (6.6-28.6)           | 14.4 (4.2-27.3)      | -2.1   |

\*Meat includes beef, pork, lamb and game, organ meats, and cured meat.

**Table S3. Food Compass scores for 9273 unique foods and beverages consumed by US adults (NHANES 01/02-17/18), overall and within 44 food subgroups**

|                            | n   | Original FCS mean $\pm$ SD | FCS 2.0 mean $\pm$ SD | Change | Original FCS median (IQR) | FCS 2.0 median (IQR) | Change |
|----------------------------|-----|----------------------------|-----------------------|--------|---------------------------|----------------------|--------|
| Waters                     | 6   | 9.2 $\pm$ 7.4              | 5.5 $\pm$ 7.6         | -3.7   | 7.2 (6.6-10.0)            | 2.9 (1.0-4.9)        | -4.3   |
| Coffee and tea             | 106 | 29.7 $\pm$ 21.7            | 27.2 $\pm$ 23.2       | -2.5   | 26.2 (13.6-46.3)          | 20.6 (10.2-44.3)     | -5.6   |
| Fruit and vegetable juices | 79  | 72.4 $\pm$ 15.3            | 65.5 $\pm$ 14.3       | -6.9   | 74.3 (62.6-82.6)          | 67.7 (57.7-73.3)     | -6.6   |
| Sweet drinks               | 199 | 28.0 $\pm$ 29.1            | 23.1 $\pm$ 27.0       | -4.9   | 20.6 (1.0-47.4)           | 12.1 (1.0-37.9)      | -8.5   |
| Diet drinks                | 19  | 25.4 $\pm$ 24.0            | 23.6 $\pm$ 20.9       | -1.8   | 19.5 (1.0-51.7)           | 25.6 (1.0-44.7)      | +6.1   |
| Bread                      | 390 | 25.9 $\pm$ 18.4            | 25.7 $\pm$ 17.1       | -0.2   | 22.2 (11.7-35.9)          | 22.0 (13.2-36.3)     | -0.2   |
| Rice and pasta             | 98  | 42.5 $\pm$ 25.7            | 49.1 $\pm$ 22.5       | +6.6   | 34.2 (20.9-67.4)          | 43.7 (30.4-68.7)     | +9.5   |
| Cold cereal                | 243 | 51.1 $\pm$ 20.7            | 41.4 $\pm$ 19.5       | -9.7   | 54.1 (38.4-67.3)          | 43.6 (25.6-56.5)     | -10.5  |
| Cooked cereal              | 179 | 42.1 $\pm$ 19.4            | 43.3 $\pm$ 17.2       | +1.2   | 39.4 (24.9-61.5)          | 42.5 (28.6-56.5)     | +3.1   |
| Cereal bars                | 95  | 42.3 $\pm$ 16.0            | 33.6 $\pm$ 14.6       | -8.7   | 42.5 (29.3-55.8)          | 34.6 (22.5-45.1)     | -7.9   |
| General fruit              | 150 | 69.7 $\pm$ 20.2            | 67.1 $\pm$ 22.8       | -2.6   | 72.2 (53.7-85.8)          | 68.5 (49.0-87.2)     | -3.7   |
| Berries                    | 37  | 80.9 $\pm$ 22.9            | 77.4 $\pm$ 27.0       | -3.5   | 95.5 (61.4-100.0)         | 95.7 (54.7-100.0)    | +0.2   |
| Citrus                     | 17  | 88.6 $\pm$ 13.4            | 87.8 $\pm$ 14.8       | -0.8   | 92.3 (81.7-100.0)         | 93.7 (82.4-100.0)    | +1.4   |
| Dried fruit                | 38  | 69.6 $\pm$ 14.3            | 69.6 $\pm$ 16.0       | 0.0    | 68.3 (60.3-80.4)          | 68.3 (59.9-83.2)     | 0.0    |
| General vegetables         | 458 | 80.8 $\pm$ 16.8            | 82.0 $\pm$ 15.5       | +1.2   | 82.8 (69.2-96.3)          | 83.3 (72.5-95.0)     | +0.5   |
| Green vegetables           | 394 | 93.2 $\pm$ 10.4            | 93.0 $\pm$ 10.0       | -0.2   | 100.0 (88.8-100.0)        | 100.0 (86.4-100.0)   | 0.0    |
| Red and orange vegetables  | 144 | 77.4 $\pm$ 16.3            | 78.3 $\pm$ 15.5       | +0.9   | 77.5 (68.5-90.9)          | 78.1 (70.3-89.9)     | +0.6   |
| Starchy vegetables         | 429 | 51.9 $\pm$ 13.0            | 56.0 $\pm$ 13.5       | +4.1   | 52.4 (42.0-59.9)          | 57.6 (47.6-63.8)     | +5.2   |
| Pickled vegetables         | 43  | 56.7 $\pm$ 27.0            | 54.0 $\pm$ 28.1       | -2.7   | 60.1 (40.6-76.2)          | 55.8 (39.8-71.1)     | -4.3   |

|                             |     |             |             |       |                  |                  |       |
|-----------------------------|-----|-------------|-------------|-------|------------------|------------------|-------|
| Legumes                     | 212 | 79.2 ± 15.9 | 78.9 ± 16.1 | -0.3  | 84.3 (71.5-89.4) | 83.4 (74.4-89.0) | -0.9  |
| Nuts and seeds              | 100 | 87.1 ± 15.0 | 85.0 ± 14.2 | -2.1  | 91.6 (79.8-98.5) | 88.5 (77.4-94.7) | -3.1  |
| Beef                        | 91  | 33.2 ± 5.5  | 44.3 ± 5.5  | +11.1 | 33.1 (30.5-36.6) | 45.0 (42.7-47.2) | +11.9 |
| Pork                        | 82  | 34.9 ± 7.5  | 44.4 ± 8.5  | +9.5  | 37.1 (32.8-39.3) | 46.4 (43.4-48.3) | +9.3  |
| Lamb and game               | 48  | 38.5 ± 8.3  | 49.2 ± 8.4  | +10.7 | 37.4 (31.6-42.0) | 48.7 (41.8-52.8) | +11.3 |
| Organ meats                 | 13  | 51.2 ± 17.1 | 61.7 ± 14.7 | +10.5 | 53.6 (35.7-64.0) | 69.6 (48.8-72.6) | +16.0 |
| Poultry                     | 401 | 44.4 ± 10.0 | 52.3 ± 12.2 | +7.9  | 46.5 (38.5-52.1) | 55.6 (46.3-61.7) | +9.1  |
| Cured meats                 | 189 | 6.0 ± 7.5   | 10.5 ± 10.1 | +4.5  | 1.0 (1.0-9.4)    | 6.4 (1.0-18.6)   | +5.4  |
| Eggs                        | 245 | 46.2 ± 12.5 | 54.3 ± 12.6 | +8.1  | 47.8 (39.1-54.4) | 56.3 (46.7-63.7) | +8.5  |
| Seafood                     | 330 | 71.8 ± 14.0 | 80.5 ± 13.8 | +8.7  | 72.9 (62.5-82.1) | 82.2 (71.3-91.5) | +9.3  |
| Milk                        | 147 | 41.9 ± 16.3 | 45.7 ± 18.1 | +3.8  | 41.3 (28.3-54.4) | 48.9 (30.5-60.4) | +7.6  |
| Cheese                      | 93  | 31.6 ± 8.8  | 38.9 ± 8.7  | +7.3  | 30.0 (26.7-35.0) | 39.4 (35.6-43.7) | +9.4  |
| Yogurt                      | 48  | 57.2 ± 17.3 | 53.1 ± 19.2 | -4.1  | 55.3 (45.4-71.8) | 47.1 (40.2-68.8) | -8.2  |
| Plant dairy                 | 31  | 53.6 ± 21.0 | 43.2 ± 19.6 | -10.4 | 54.9 (38.6-70.2) | 43.7 (29.9-61.3) | -11.2 |
| Plant oils                  | 107 | 37.4 ± 25.4 | 32.3 ± 24.2 | -5.2  | 34.2 (16.4-48.7) | 28.8 (14.2-47.3) | -5.4  |
| Dairy and animal fats       | 71  | 10.2 ± 8.2  | 13.7 ± 11.3 | +3.5  | 8.0 (4.0-16.6)   | 11.6 (2.6-21.0)  | +3.6  |
| Mixed vegetable dishes      | 183 | 62.4 ± 16.4 | 64.1 ± 14.9 | +1.7  | 61.2 (50.8-72.6) | 62.0 (55.2-71.4) | +0.8  |
| Mixed meat dishes           | 628 | 48.0 ± 19.7 | 52.9 ± 19.5 | +4.9  | 46.2 (35.5-58.6) | 53.0 (41.1-63.9) | +6.8  |
| Mixed rice and pasta dishes | 515 | 46.7 ± 19.7 | 50.8 ± 18.7 | +4.1  | 43.6 (31.5-62.0) | 49.0 (37.8-64.6) | +5.4  |
| Mixed grain-encased dishes  | 933 | 28.4 ± 14.7 | 29.9 ± 14.9 | +1.5  | 26.8 (19.5-36.9) | 27.9 (20.0-39.6) | +1.1  |
| Soups                       | 292 | 42.9 ± 19.6 | 45.8 ± 20.8 | +2.9  | 41.3 (28.8-54.2) | 45.4 (29.7-58.8) | +4.1  |
| Sauces                      | 110 | 45.2 ± 27.0 | 46.3 ± 24.6 | +1.1  | 43.9 (21.1-67.3) | 41.4 (24.8-64.5) | -2.5  |

|               |     |             |             |      |                  |                  |      |
|---------------|-----|-------------|-------------|------|------------------|------------------|------|
| Condiments    | 86  | 51.2 ± 31.5 | 47.8 ± 31.8 | -3.4 | 47.5 (24.1-79.9) | 40.1 (20.3-76.6) | -7.4 |
| Savory snacks | 253 | 33.1 ± 21.7 | 30.4 ± 20.0 | -2.7 | 31.8 (16.3-53.0) | 29.4 (14.6-48.0) | -2.4 |
| Desserts      | 941 | 16.9 ± 14.7 | 15.2 ± 14.3 | -1.7 | 14.1 (5.9-23.2)  | 11.0 (3.4-23.5)  | -3.1 |

---



**Table S4. Examples of changes in Food Compass Score (FCS) of individual unique foods and beverages consumed by US adults, when applying the original FCS compared to the updated FCS (FCS 2.0)<sup>a</sup>**

|                                                                    | Original FCS   | FCS 2.0        | Change     |
|--------------------------------------------------------------------|----------------|----------------|------------|
| <b>1. Beef category (mean ± SD)</b>                                | <b>33 ± 6</b>  | <b>44 ± 6</b>  | <b>+11</b> |
| Beef, roast, roasted, lean only eaten                              | 35             | 48             | +13        |
| Beef, short ribs, cooked, lean and fat eaten                       | 27             | 37             | +10        |
| Ground beef patty, breaded, cooked                                 | 41             | 45             | +3         |
| <b>2. Organ meats category (mean ± SD)</b>                         | <b>51 ± 17</b> | <b>62 ± 15</b> | <b>+11</b> |
| Beef liver, fried                                                  | 60             | 70             | +10        |
| Kidney, cooked                                                     | 64             | 73             | +9         |
| Liver paste or pate, chicken                                       | 50             | 56             | +6         |
| <b>3. Lamb and game category (mean ± SD)</b>                       | <b>39 ± 8</b>  | <b>49 ± 8</b>  | <b>+10</b> |
| Venison/deer, roasted                                              | 39             | 51             | +12        |
| Lamb, shoulder, cooked, lean only eaten                            | 39             | 49             | +10        |
| Venison/deer steak, breaded or floured                             | 55             | 59             | +4         |
| <b>4. Pork category (mean ± SD)</b>                                | <b>35 ± 8</b>  | <b>44 ± 9</b>  | <b>+9</b>  |
| Ham, fresh, cooked, lean only eaten                                | 40             | 51             | +11        |
| Pork roast, loin, cooked, lean and fat eaten                       | 38             | 48             | +10        |
| Pork, pickled                                                      | 1              | 2              | +1         |
| <b>5. Seafood category (mean ± SD)</b>                             | <b>72 ± 14</b> | <b>81 ± 14</b> | <b>+9</b>  |
| Cod, battered, fried                                               | 64             | 75             | +11        |
| Salmon, raw                                                        | 97             | 100            | +3         |
| Fish stick, patty or nugget from fast food                         | 40             | 41             | +1         |
| <b>6. Eggs category (mean ± SD)</b>                                | <b>46 ± 13</b> | <b>54 ± 13</b> | <b>+8</b>  |
| Egg, whole, fried no added fat                                     | 48             | 62             | +14        |
| Spanish omelet, made with onions, peppers, tomatoes, and mushrooms | 68             | 76             | +8         |
| Egg substitute, not specified as to powdered, frozen, or liquid    | 50             | 45             | -5         |
| <b>7. Poultry category (mean ± SD)</b>                             | <b>44 ± 10</b> | <b>52 ± 12</b> | <b>+8</b>  |
| Chicken thigh, rotisserie, skin eaten                              | 43             | 54             | +11        |
| Chicken breast, grilled without sauce, skin not eaten              | 61             | 68             | +7         |
| Chicken nuggets                                                    | 27             | 26             | -1         |
| <b>8. Cheese category (mean ± SD)</b>                              | <b>32 ± 9</b>  | <b>39 ± 9</b>  | <b>+7</b>  |
| Brie cheese                                                        | 27             | 38             | +11        |
| Ricotta cheese                                                     | 40             | 47             | +7         |
| Imitation cheese, American or cheddar type                         | 27             | 25             | -2         |
| <b>9. Rice and pasta category (mean ± SD)</b>                      | <b>43 ± 26</b> | <b>49 ± 23</b> | <b>+6</b>  |
| Rice noodles, cooked                                               | 1              | 12             | +11        |

|                                                            |                |                |            |
|------------------------------------------------------------|----------------|----------------|------------|
| Rice, brown, cooked                                        | 65             | 69             | +4         |
| Quinoa, no fat added                                       | 88             | 89             | +1         |
| <b>10. Cold cereal category (mean ± SD)</b>                | <b>51 ± 21</b> | <b>41 ± 20</b> | <b>-10</b> |
| Kellogg's Froot Loops                                      | 46             | 29             | -17        |
| Kellogg's Cocoa Krispies                                   | 28             | 16             | -12        |
| Kellogg's All-Bran                                         | 62             | 59             | -3         |
| <b>11. Plant dairy category (mean ± SD)</b>                | <b>54 ± 21</b> | <b>43 ± 20</b> | <b>-9</b>  |
| Soy milk, light, chocolate                                 | 66             | 49             | -17        |
| Almond milk, unsweetened                                   | 83             | 73             | -10        |
| Coconut milk, used in cooking                              | 36             | 41             | +5         |
| <b>12. Cereal bars category (mean ± SD)</b>                | <b>42 ± 16</b> | <b>34 ± 16</b> | <b>-8</b>  |
| Kellogg's Nutri-Grain Cereal Bar                           | 48             | 35             | -13        |
| Nature Valley Chewy Trail Mix Granola Bar                  | 39             | 31             | -8         |
| Breakfast bar, date, with yogurt coating                   | 59             | 55             | -4         |
| <b>13. Fruit and vegetable juices category (mean ± SD)</b> | <b>72 ± 15</b> | <b>66 ± 14</b> | <b>-6</b>  |
| Peach juice, with sugar                                    | 48             | 34             | -14        |
| Mixed vegetable juice                                      | 100            | 95             | -5         |
| 100% Cranberry juice                                       | 58             | 55             | -3         |
| <b>14. Plant oils category (mean ± SD)</b>                 | <b>37 ± 25</b> | <b>32 ± 24</b> | <b>-5</b>  |
| Margarine-oil blend, tub                                   | 46             | 37             | -9         |
| Olive oil                                                  | 80             | 78             | -2         |
| Coconut oil                                                | 3              | 13             | +10        |
| <b>15. Sweet drinks category (mean ± SD)</b>               | <b>28 ± 29</b> | <b>23 ± 27</b> | <b>-5</b>  |
| High protein ready-to-drink nutritional drink              | 88             | 70             | -18        |
| Soft drink, cola                                           | 1              | 1              | 0          |
| Fruit smoothie with whole fruit and dairy                  | 72             | 74             | +2         |
| <b>16. Yogurt category (mean ± SD)</b>                     | <b>57 ± 17</b> | <b>53 ± 19</b> | <b>-4</b>  |
| Yogurt, fruit, non-fat milk, light                         | 99             | 87             | -12        |
| Yogurt, Greek, chocolate, non-fat                          | 72             | 61             | -11        |
| Yogurt, Greek, low fat milk, plain                         | 77             | 82             | +5         |

a. Example products are shown from subcategories with the greatest positive (subcategories 1-9) and negative (subcategories 10-16) mean change in FCS (from FCS 1.0 to 2.0). Example products were selected to demonstrate the spectrum of changes in FCS at the individual product level.

**Table S5. Updated (FCS 2.0) and original (FCS 1.0) Food Compass Scores, NOVA classification, Nutri-Score category and Health Star Rating for each of 9,273 unique foods and beverages consumed by U.S. adults.**

*See pages at the end of this supplement (pages 32-286)*

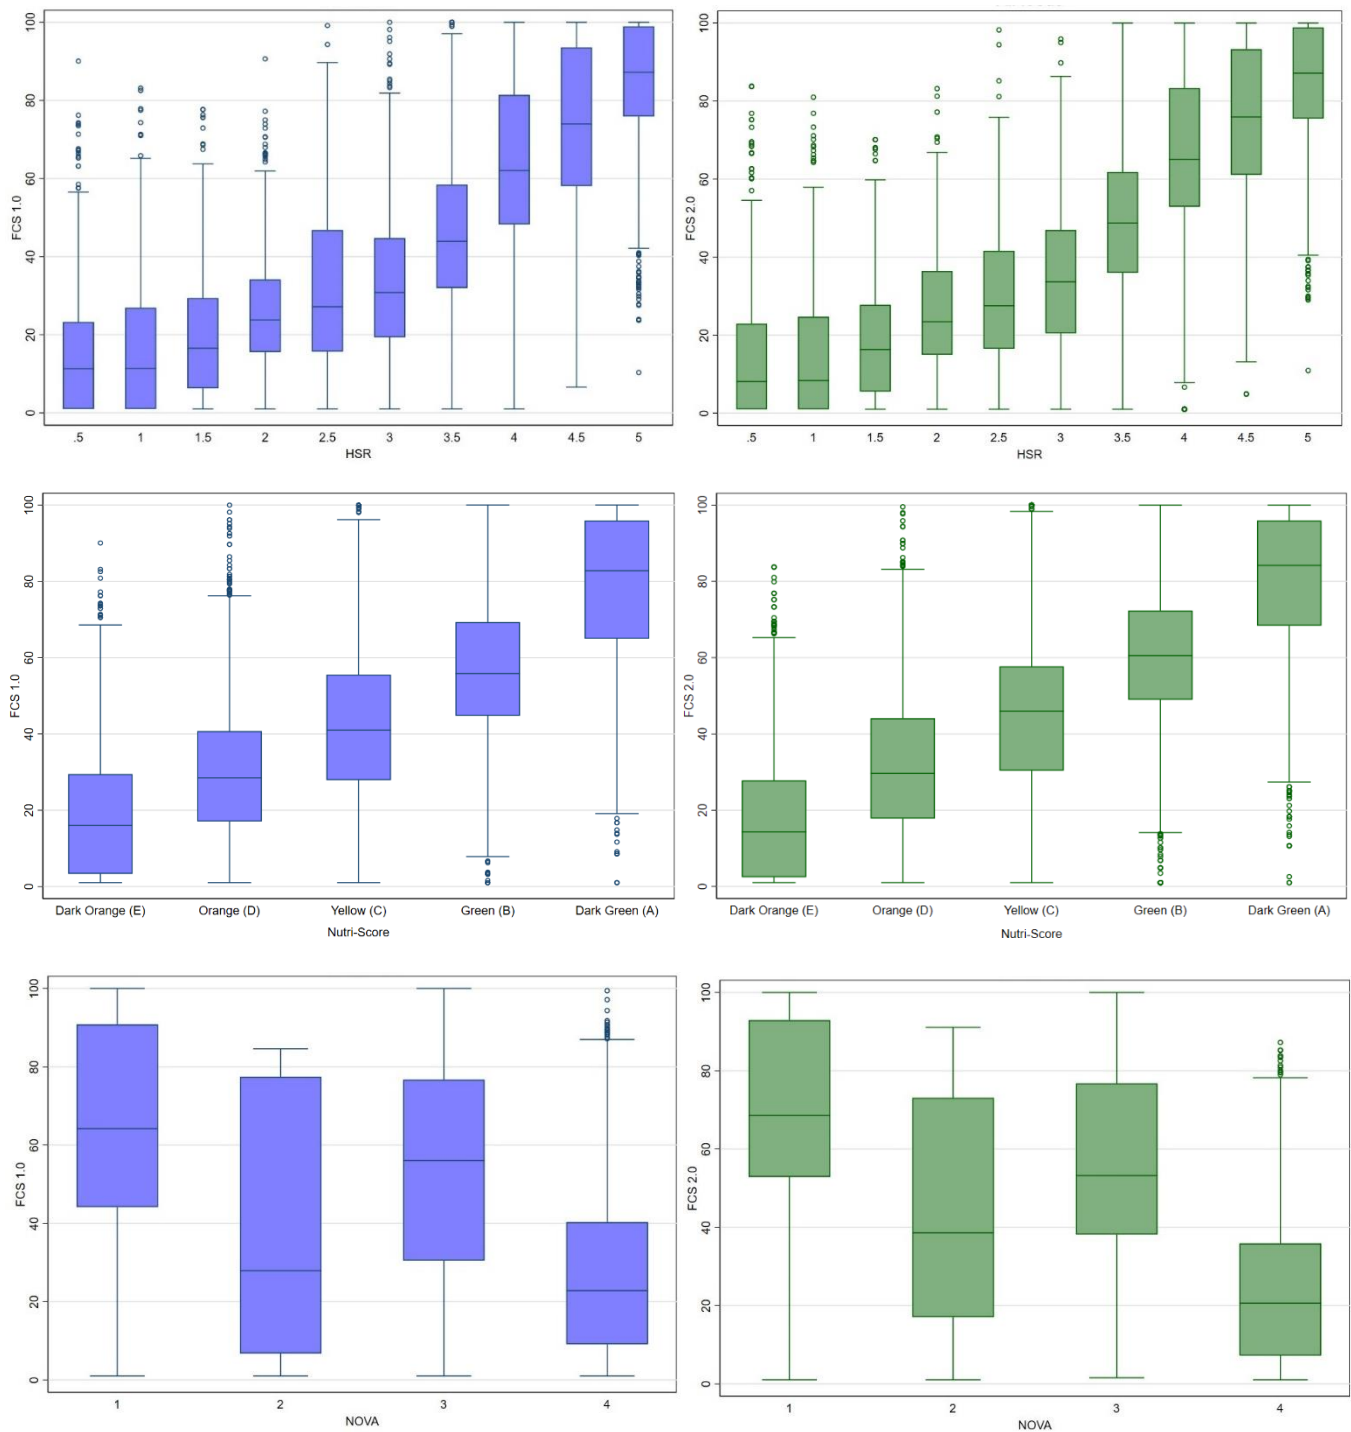

**Figure S2. Updated (green) and original (blue) Food Compass scores according to HSR category (top), Nutri-Score category (middle) and NOVA category (bottom) for unique foods and beverages consumed in the United States (FND DS 01/02-17/18).** Standard box plots are shown, with horizontal lines representing the median value, bounds of boxes representing the 25<sup>th</sup> (lower bound) and 75<sup>th</sup> (upper bound) percentile values, whiskers representing 1.5\*interquartile range from the 25<sup>th</sup> percentile (for the lower whisker) and the 75<sup>th</sup> percentile (for the upper whisker), and the black dots beyond these bounds representing outliers. For the HSR box plots, 9273 unique products were included. For the NOVA box plots, 4906 unique individual products (i.e. excluding mixed dishes and meals with non-integer NOVA scores) were included.

**Table S6. Correlations between the Food Compass (Original and FCS 2.0), the Australian and New Zealand Health Star Rating (HSR), the Nutri-Score, and the NOVA food classification system**

| <b>Food Category</b>             | <b>n</b>    | <b>Original FCS vs. HSR</b> | <b>FCS 2.0 vs. HSR</b> | <b>Original FCS vs. Nutri-Score</b> | <b>FCS 2.0 vs. Nutri-Score</b> | <b>Original FCS vs. NOVA</b> | <b>FCS 2.0 vs. NOVA</b> |
|----------------------------------|-------------|-----------------------------|------------------------|-------------------------------------|--------------------------------|------------------------------|-------------------------|
| Beverages                        | 409         | 0.48                        | 0.52                   | 0.21                                | 0.25                           | 0.65                         | 0.72                    |
| Grains                           | 1005        | 0.27                        | 0.42                   | 0.24                                | 0.42                           | 0.07                         | 0.31                    |
| Fruit                            | 242         | 0.77                        | 0.77                   | 0.50                                | 0.50                           | 0.78                         | 0.83                    |
| Vegetables                       | 1468        | 0.37                        | 0.40                   | 0.68                                | 0.69                           | 0.21                         | 0.29                    |
| Legumes, Nuts and Seeds          | 312         | 0.46                        | 0.55                   | 0.34                                | 0.41                           | 0.50                         | 0.61                    |
| Meat*, poultry and eggs          | 1069        | 0.66                        | 0.67                   | 0.74                                | 0.72                           | 0.48                         | 0.61                    |
| Fish and seafood                 | 330         | 0.50                        | 0.53                   | 0.41                                | 0.45                           | 0.43                         | 0.53                    |
| Dairy                            | 319         | 0.51                        | 0.53                   | 0.66                                | 0.65                           | 0.31                         | 0.58                    |
| Fats and oils                    | 178         | 0.47                        | 0.36                   | 0.42                                | 0.33                           | 0.27                         | 0.48                    |
| Mixed dishes                     | 2551        | 0.62                        | 0.63                   | 0.61                                | 0.63                           | 0.56                         | 0.68                    |
| Sauces and condiments            | 196         | 0.57                        | 0.59                   | 0.55                                | 0.57                           | 0.38                         | 0.49                    |
| Savory snacks and sweet desserts | 1194        | 0.38                        | 0.45                   | 0.30                                | 0.36                           | 0.20                         | 0.32                    |
| <b>Overall</b>                   | <b>9273</b> | <b>0.70</b>                 | <b>0.73</b>            | <b>0.69</b>                         | <b>0.72</b>                    | <b>0.56</b>                  | <b>0.68</b>             |

9273 unique food items were included from across FNDDS 2001-02 to 2017-18. HSR and Nutri-Score numerical scores (0.5-5 and 1-5, respectively) were used to assess Spearman correlations (values shown) with the original and updated (2.0) Food Compass score (FCS). NOVA non-integer scores were used for mixed dishes (an energy-weighted average based on the NOVA classification of the ingredients in the dish). To facilitate a clearer representation of the correlation between FCS and NOVA in the same direction, the sign of NOVA was flipped (multiplied by -1).

\* Meat includes beef, pork, lamb and game, organ meats, and cured meat.

**Table S7. Multivariable-adjusted, cross-sectional associations of the individual Food Compass 2.0 Score (i.FCS) with major clinical risk factors and prevalent health conditions among U.S. adults, 1999–2018**

| Clinical risk factors                 | Difference <sup>a</sup> | P-value <sup>b</sup> |
|---------------------------------------|-------------------------|----------------------|
| <b>BMI, kg/m<sup>2</sup></b>          |                         |                      |
| per SD (10.8 points) <sup>c</sup>     | -0.56 (-0.65, -0.47)*** | <0.001               |
| Quintiles                             |                         |                      |
| Q1                                    | 0.00 (ref)              |                      |
| Q2                                    | -0.34 (-0.62, -0.06)*   | 0.019                |
| Q3                                    | -0.59 (-0.88, -0.30)*** | <0.001               |
| Q4                                    | -0.82 (-1.11, -0.53)*** | <0.001               |
| Q5                                    | -1.61 (-1.90, -1.32)*** | <0.001               |
| <b>Systolic blood pressure, mmHg</b>  |                         |                      |
| per SD                                | -0.55 (-0.77, -0.34)*** | <0.001               |
| Quintiles                             |                         |                      |
| Q1                                    | 0.00 (ref)              |                      |
| Q2                                    | -0.66 (-1.26, -0.06)*   | 0.032                |
| Q3                                    | -0.84 (-1.52, -0.15)*   | 0.018                |
| Q4                                    | -0.97 (-1.66, -0.28)**  | <0.01                |
| Q5                                    | -1.71 (-2.38, -1.04)*** | <0.001               |
| <b>Diastolic blood pressure, mmHg</b> |                         |                      |
| per SD                                | -0.46 (-0.63, -0.29)*** | <0.001               |
| Quintiles                             |                         |                      |
| Q1                                    | 0.00 (ref)              |                      |
| Q2                                    | -0.23 (-0.71, 0.24)     | 0.333                |
| Q3                                    | -0.77 (-1.27, -0.27)**  | <0.01                |
| Q4                                    | -0.65 (-1.16, -0.13)*   | 0.015                |
| Q5                                    | -1.32 (-1.85, -0.80)*** | <0.001               |
| <b>LDL-C, mg/dL</b>                   |                         |                      |
| per SD                                | -1.49 (-2.10, -0.87)*** | <0.001               |
| Quintiles                             |                         |                      |
| Q1                                    | 0.00 (ref)              |                      |
| Q2                                    | -0.70 (-2.46, 1.07)     | 0.440                |
| Q3                                    | -2.08 (-3.89, -0.27)*   | 0.026                |
| Q4                                    | -1.36 (-3.22, 0.49)     | 0.153                |
| Q5                                    | -3.97 (-5.73, -2.22)*** | <0.001               |
| <b>HDL-C, mg/dL</b>                   |                         |                      |
| per SD                                | 1.61 (1.41, 1.81)***    | <0.001               |
| Quintiles                             |                         |                      |
| Q1                                    | 0.00 (ref)              |                      |
| Q2                                    | 1.14 (0.56, 1.71)***    | <0.001               |
| Q3                                    | 2.16 (1.58, 2.73)***    | <0.001               |

|                                        |                         |        |
|----------------------------------------|-------------------------|--------|
| Q4                                     | 2.77 (2.20, 3.35)***    | <0.001 |
| Q5                                     | 4.20 (3.61, 4.79)***    | <0.001 |
| <b>Triglycerides, mg/d</b>             |                         |        |
| per SD                                 | -0.96 (-2.55, 0.64)     | 0.242  |
| Quintiles                              |                         |        |
| Q1                                     | 0.00 (ref)              |        |
| Q2                                     | 0.76 (-3.31, 4.84)      | 0.714  |
| Q3                                     | 2.59 (-1.73, 6.90)      | 0.242  |
| Q4                                     | -0.94 (-5.54, 3.66)     | 0.688  |
| Q5                                     | -1.18 (-6.02, 3.67)     | 0.635  |
| <b>TC: HDL ratio, 1 unit</b>           |                         |        |
| per SD                                 | -0.12 (-0.13, -0.10)*** | <0.001 |
| Quintiles                              |                         |        |
| Q1                                     | 0.00 (ref)              |        |
| Q2                                     | -0.07 (-0.13, -0.01)*   | 0.026  |
| Q3                                     | -0.15 (-0.21, -0.10)*** | <0.001 |
| Q4                                     | -0.19 (-0.24, -0.13)*** | <0.001 |
| Q5                                     | -0.30 (-0.35, -0.25)*** | <0.001 |
| <b>HbA1c, %</b>                        |                         |        |
| per SD                                 | -0.02 (-0.02, -0.01)*** | <0.001 |
| Quintiles                              |                         |        |
| Q1                                     | 0.00 (ref)              |        |
| Q2                                     | -0.00 (-0.02, 0.02)     | 0.989  |
| Q3                                     | -0.00 (-0.02, 0.02)     | 0.990  |
| Q4                                     | -0.02 (-0.05, -0.00)*   | 0.041  |
| Q5                                     | -0.04 (-0.07, -0.02)*** | <0.001 |
| <b>Fasting plasma glucose, (mg/dL)</b> |                         |        |
| per SD                                 | -0.36 (-0.67, -0.05)*   | 0.024  |
| Quintiles                              |                         |        |
| Q1                                     | 0.00 (ref)              |        |
| Q2                                     | -0.31 (-1.14, 0.53)     | 0.475  |
| Q3                                     | 0.01 (-0.84, 0.86)      | 0.980  |
| Q4                                     | -0.52 (-1.40, 0.35)     | 0.243  |
| Q5                                     | -1.26 (-2.14, -0.38)**  | <0.01  |
| <b>Prevalent health conditions</b>     |                         |        |
| <b>Metabolic syndrome<sup>d</sup></b>  |                         |        |
| per SD                                 | 0.86 (0.83, 0.89)***    | <0.001 |
| Quintiles                              |                         |        |
| Q1                                     | 0.00 (ref)              |        |
| Q2                                     | 0.88 (0.80, 0.97)*      | 0.014  |
| Q3                                     | 0.82 (0.75, 0.90)***    | <0.001 |
| Q4                                     | 0.78 (0.70, 0.87)***    | <0.001 |
| Q5                                     | 0.65 (0.59, 0.71)***    | <0.001 |

|                                                   |                                  |        |
|---------------------------------------------------|----------------------------------|--------|
| <b>Diabetes<sup>e</sup></b>                       |                                  |        |
| per SD                                            | 0.97 (0.92, 1.03)                | 0.284  |
| <b>Quintiles</b>                                  |                                  |        |
| Q1                                                | 0.00 (ref)                       |        |
| Q2                                                | 0.97 (0.84, 1.11)                | 0.628  |
| Q3                                                | 0.99 (0.85, 1.14)                | 0.860  |
| Q4                                                | 0.97 (0.83, 1.12)                | 0.642  |
| Q5                                                | 0.88 (0.75, 1.04)                | 0.131  |
| <b>CVD<sup>f</sup></b>                            |                                  |        |
| per SD                                            | 0.92 (0.88, 0.96) <sup>***</sup> | <0.001 |
| <b>Quintiles</b>                                  |                                  |        |
| Q1                                                | 0.00 (ref)                       |        |
| Q2                                                | 0.99 (0.83, 1.17)                | 0.878  |
| Q3                                                | 0.97 (0.84, 1.13)                | 0.708  |
| Q4                                                | 0.90 (0.77, 1.04)                | 0.152  |
| Q5                                                | 0.86 (0.74, 0.99) <sup>*</sup>   | 0.035  |
| <b>Cancer</b>                                     |                                  |        |
| per SD                                            | 0.93 (0.89, 0.98) <sup>**</sup>  | <0.01  |
| <b>Quintiles</b>                                  |                                  |        |
| Q1                                                | 0.00 (ref)                       |        |
| Q2                                                | 0.96 (0.83, 1.12)                | 0.604  |
| Q3                                                | 0.91 (0.79, 1.07)                | 0.256  |
| Q4                                                | 0.77 (0.67, 0.89) <sup>***</sup> | <0.001 |
| Q5                                                | 0.86 (0.74, 1.00)                | 0.051  |
| <b>Lung disease</b>                               |                                  |        |
| per SD                                            | 0.90 (0.87, 0.94) <sup>***</sup> | <0.001 |
| <b>Quintiles</b>                                  |                                  |        |
| Q1                                                | 0.00 (ref)                       |        |
| Q2                                                | 0.92 (0.83, 1.02)                | 0.123  |
| Q3                                                | 0.84 (0.77, 0.92) <sup>***</sup> | <0.001 |
| Q4                                                | 0.78 (0.70, 0.88) <sup>***</sup> | <0.001 |
| Q5                                                | 0.73 (0.65, 0.82) <sup>***</sup> | <0.001 |
| <b>Optimal cardiometabolic health<sup>g</sup></b> |                                  |        |
| per SD                                            | 1.22 (1.14, 1.30) <sup>***</sup> | <0.001 |
| <b>Quintiles</b>                                  |                                  |        |
| Q1                                                | 0.00 (ref)                       |        |
| Q2                                                | 1.13 (0.95, 1.35)                | 0.182  |
| Q3                                                | 1.28 (1.07, 1.53) <sup>**</sup>  | <0.01  |
| Q4                                                | 1.33 (1.09, 1.61) <sup>**</sup>  | <0.01  |
| Q5                                                | 1.79 (1.48, 2.16) <sup>***</sup> | <0.001 |

BMI body mass index, CI confidence interval, CVD cardiovascular disease, HbA1c hemoglobin A1c, HDL-C high-density lipoprotein cholesterol, i.FCS individual dietary Food Compass Score, LDL low density lipoprotein cholesterol, TC:HDL total cholesterol to HDL-cholesterol ratio.

<sup>a</sup> Survey-weighted, multivariable-adjusted linear or logistic regression models incorporated



NHANES dietary recall sample weights to account for the complex survey design and response rates and provide nationally representative effect estimates and associated 95% confidence interval for the non-institutionalized U.S. population. All models adjusted for: age (years), age<sup>2</sup> (years), sex, race/ethnicity (Mexican-American, other Hispanic, non-Hispanic White, non-Hispanic Black, Asian/other race), education level (<HS graduate, HS graduate, some college or associates degree, ≥ college graduate), income (poverty: income ratio), smoking status (nonsmoker, former smoker, current smoker); total physical activity (MET-hours/week), alcohol use (%energy), and self-reported diabetes (yes, no).

<sup>b</sup> *P*-values were calculated using two-sided t-test (alpha=0.05).

<sup>c</sup> Individual Food Compass Score (i.FCS) calculated as the energy-weighted mean of FCS of all foods consumed, as reported in up to two 24 hr recalls per person, with a potential range from 1 to 100.

<sup>d</sup> Defined according to AHA/NHLBI as the presence of three or more of: HDL-C < 40mg/dL (men)/ <50mg/dL (women) or on drug treatment for low HDL-C; triglycerides ≥150mg/dL or on drug treatment for elevated triglycerides; blood pressure ≥130 SBP or ≥85 DBP or on antihypertensive drug treatment with a history of hypertension; WC ≥102 cm (men)/ ≥88cm (women); and fasting plasma glucose ≥100mg/dL or on drug treatment for elevated glucose.

<sup>e</sup> Defined based on presence of at least one of: HbA1c level > 6.5%, fasting plasma glucose > 126mg/dL, or use of diabetes medications.

<sup>f</sup> Defined based on the presence of both (1) self-reported coronary heart disease, heart failure, stroke, myocardial infarction, or angina and also (2) cardiovascular medication use including use of angina, hypertension, or lipid medications.

<sup>g</sup> Defined based on optimal levels for each of the following: adiposity (BMI <25 kg/m<sup>2</sup> and WC ≤88cm (women)/WC ≤102 cm (men)); blood glucose (FPG <100mg/dL and HbA1c <5.7% and not taking diabetes medication); blood lipids (TC:HDL <3.5:1 and not taking lipid lowering medication); blood pressure (SBP <120mmHg, DBP <80mmHg and not taking blood-pressure lowering medication); and history of CVD (no self-reported CHD, heart failure, myocardial infarction, stroke, or angina).

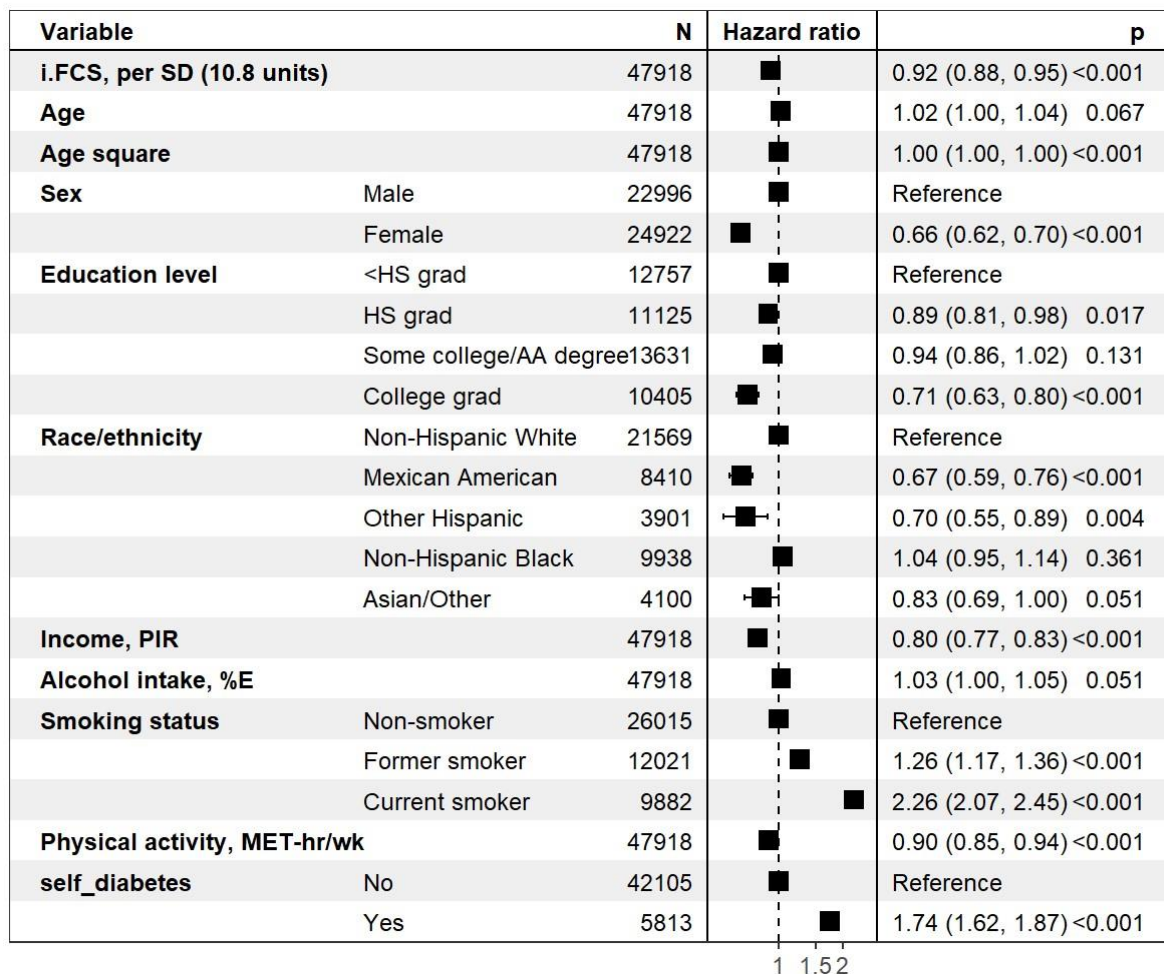

**Figure S3. Independent prospective associations of the individual Food Compass 2.0 Score (i.FCS) and each sociodemographic factor included in the multivariable model with all-cause mortality among U.S. adults, 1999–2018.** The i.FCS for each person was calculated as the energy weighted mean of the FCS of all unique foods and beverages consumed, based on up to two 24 hr recalls per person, with a potential range from 1 to 100. Boxes represent the multivariable-adjusted hazard ratio; and error bars, the 95% CI; based on survey-weighted Cox proportional hazard models incorporating NHANES dietary recall sample weights to account for the complex survey design and response rates and provide nationally representative estimates for the noninstitutionalized U.S. population. All variables in the Figure were included together in the multivariable model. *P*-values were calculated using two-sided Wald test ( $\alpha=0.05$ ). AA Associates Degree, grad graduate, HS high school, i.FCS individual Food Compass Score, MET metabolic equivalent of task, %E percent energy, PIR ratio of family income to poverty threshold, SD standard deviation.

**Table S8. Multivariable adjusted, survey-weighted prospective analysis of individual Food Compass Score (i.FCS) with all-cause and cause-specific mortality among U.S adults, 1999-2018**

| <b>i.FCS</b>                       | <b>N for deaths</b> | <b>Mortality (Hazard Ratio [95% CI])<sup>a</sup></b> | <b>P-value<sup>b</sup></b> |
|------------------------------------|---------------------|------------------------------------------------------|----------------------------|
| <b>All-cause</b>                   |                     |                                                      |                            |
| Per SD (10.8 points)               | 7481                | 0.92 (0.88, 0.95)                                    | <0.001                     |
| Quintiles                          |                     |                                                      |                            |
| Q1                                 | 1330                | 1.0 (ref)                                            |                            |
| Q2                                 | 1427                | 0.80 (0.73, 0.89)                                    | <0.001                     |
| Q3                                 | 1549                | 0.85 (0.77, 0.95)                                    | 0.003                      |
| Q4                                 | 1647                | 0.82 (0.75, 0.90)                                    | <0.001                     |
| Q5                                 | 1528                | 0.76 (0.68, 0.84)                                    | <0.001                     |
| <b>CMD-specific<sup>c</sup></b>    |                     |                                                      |                            |
| Per SD (10.8 points)               | 2619                | 0.95 (0.89, 1.01)                                    | 0.113                      |
| Quintiles                          |                     |                                                      |                            |
| Q1                                 | 419                 | 1.0 (ref)                                            |                            |
| Q2                                 | 473                 | 0.84 (0.70, 1.00)                                    | 0.052                      |
| Q3                                 | 551                 | 0.91 (0.77, 1.08)                                    | 0.278                      |
| Q4                                 | 600                 | 0.90 (0.77, 1.06)                                    | 0.195                      |
| Q5                                 | 576                 | 0.81 (0.67, 0.98)                                    | 0.031                      |
| <b>Cancer-specific<sup>d</sup></b> |                     |                                                      |                            |
| Per SD (10.8 points)               | 1691                | 0.92 (0.85, 1.00)                                    | 0.052                      |
| Quintiles                          |                     |                                                      |                            |
| Q1                                 | 329                 | 1.0 (ref)                                            |                            |
| Q2                                 | 335                 | 0.78 (0.63, 0.96)                                    | 0.022                      |
| Q3                                 | 336                 | 0.80 (0.65, 1.00)                                    | 0.048                      |
| Q4                                 | 358                 | 0.79 (0.63, 0.98)                                    | 0.029                      |
| Q5                                 | 333                 | 0.77 (0.62, 0.96)                                    | 0.019                      |

<sup>a</sup> Survey-weighted Cox proportional hazard models incorporated NHANES dietary sample weights to account for the complex survey design and response rates and provide nationally representative estimates the hazard ratio and associated 95% confidence interval for the non-institutionalized U.S. population. Study time used as time variable in analysis (where baseline data collection: t = 0 yr). Models were adjusted for age (years), age<sup>2</sup> (years), sex, race/ethnicity (Mexican-American, other Hispanic, non-Hispanic White, non-Hispanic Black, Asian/other race), education level (<HS graduate, HS graduate, some college or associates degree, ≥ college graduate), income (poverty: income ratio), smoking status (non-smoker, former smoker, current smoker); total physical activity (MET-hours/week), alcohol use (%energy), and self-reported diabetes (yes, no).

<sup>b</sup> P-values were calculated using two-sided Wald test (alpha=0.05).

<sup>c</sup> Cardiometabolic disease (CMD)-specific mortality is the sum of deaths from coronary heart disease, stroke, and diabetes.

<sup>d</sup> Cancer-specific mortality includes deaths from all cancer types.

CI, confidence interval; CMD, cardiometabolic disease; i.FCS, individual, dietary Food Compass Score.

## **Supplementary Methods 1**

### **Part 1. Application and validation**

The FCS algorithm was updated (see Table S1 for details and rationales) based on updated evidence, availability of new data, and feedback from the scientific community. We compared FCS 2.0 to the original FCS by repeating the analyses conducted previously and described in detail elsewhere (1, 2). Briefly, we applied the original and updated Food Compass algorithm to 9273 unique foods and beverages reported in the National Health and Nutrition Examination Survey (NHANES) from the years 2001-02 to 2017-18, contained within FNDDS 2001-02 to 2017-18.

Products were scored in their form as consumed. We excluded infant formula, baby foods, specialized dietary foods, alcohol, and products providing <5 kcal per 100g. Attributes with missing values were handled as in our 2022 FCS publication and described briefly in **Text S2**. The final score distributions were calculated overall and stratified into 12 major food groups and 44 nested food subgroups.

We assessed face validity by evaluating FCS values across food groups and subgroups, considering the distribution of scores and the specific foods scoring higher, middle, and lower in each group. The convergent and discriminate validity of Food Compass 2.0 was assessed by comparing it to the NOVA processing classification system (3), the 2023 Nutri-Score algorithm (4) and the 2020 Australian and New Zealand Health Star Rating (HSR) algorithm (5). The NOVA classification for homemade mixed dishes that could include various ingredients of differing NOVA classes was calculated as the energy-weighted sum of the NOVA score of its ingredients.

### **Part 2. Validation of individual's Food Compass 2.0 Score (i.FCS)**

We further evaluated the validity of the FCS 2.0 by examining the associations between an individual's FCS 2.0 based on cumulative scores of items consumed and a validated healthy dietary pattern (construct validity) and major health outcomes (criterion validity).

### ***Study design and participants***

We used nationally representative data among 47,999 adults aged 20–85 years enrolled in 10 NHANES cycles, 1999–2000 through 2017–2018. The mean (SD) age was 47.2 years (17.1) and 52.2% were female. NHANES collects information on sociodemographic factors, clinical risk factors, health conditions, and dietary and other lifestyle habits from recurrent cross-sectional nationally representative samples. Through linkage to the National Death Index (NDI), we prospectively evaluated mortality outcomes among 47,918 NHANES adult participants across all cycles (excluding 81 participants who did not have linked NDI information). NHANES was approved by the Institutional Review Board at the National Center for Health Statistics (NCHS) and all participants provided informed written consent. Details of NHANES data collection methods, survey design and sampling are provided in our 2022 FCS publication (2).

### ***Dietary assessment and calculation of i.FCS***

Dietary intake was assessed in NHANES using standardized 24 hr dietary recalls, administered by trained NHANES interviewers, using United States Department of Agriculture's Automated Multiple Pass Method (6). We used all complete and reliable (as defined previously (2)) dietary records available as determined by the NCHS staff, averaging the two recalls for each individual when available (two recalls were taken for 87% of respondents from 2003-04 cycles onwards).

To extend FCS for specific products to an individual's overall diet, the FCS score for each item reported in a person's diet was weighted by its percent contribution to that person's total energy intake, and then summed, to calculate an individual's Food Compass Score (i.FCS). Energy from alcohol intake was excluded from the i.FCS calculation and included as a covariate in all models. For products reported by participants within the 1999-2000 NHANES survey cycle, where there is no corresponding FNDDS database, nutrition data for each product food code was copied over from the most proximal available year. For the 115 unique products remaining without an exact food code match in other years, the product description was used to assign a food code from the earliest (i.e., most proximal) edition of the FNDDS database. The i.FCS for an individual could theoretically range from 1 to 100.

### ***Outcomes***

The i.FCS was validated against three different outcomes: (a) the Healthy Eating Index (HEI) 2015, a validated measure of a healthy dietary pattern; (b) prevalence of major clinical risk factors and health conditions; and (c) prospective risk of all-cause and cause-specific mortality.

HEI 2015, a measure based on adherence to the 2015–2020 Dietary Guidelines for Americans (DGAs), was calculated for each individual. HEI 2015 is calculated based on key food groups and nutrients emphasized in the DGAs, resulting in a score ranging from 0 to 100.

Major clinical risk factors assessed included body mass index (BMI); systolic and diastolic blood pressure (mm Hg); HDL-cholesterol, LDL-cholesterol, triglycerides (mg/dL), and the total cholesterol: HDL ratio; and HbA1c (%) and fasting plasma

glucose (mg/dL). Health conditions assessed included the presence of metabolic syndrome, diabetes, cardiovascular disease (CVD), cancer, and lung disease; as well as optimal cardiometabolic health, characterized by optimal levels of adiposity, blood glucose, blood lipids, blood pressure, and absence of prior clinical CVD (**Table S7**). Missing data were handled as detailed previously (2).

NHANES survey data were linked to the NDI mortality data from the Public-Use Linked Mortality Files (7), allowing prospective assessment of mortality through Jan 1, 2019. Deaths were adjudicated by the NCHS using standardized procedures. Our primary endpoint was mortality from all causes with secondary outcomes of deaths from cardiometabolic disease (sum of deaths from coronary heart disease, stroke, and diabetes) and from all cancer.

### ***Statistical analysis***

The relationship of i.FCS with HEI 2015 was assessed using Spearman correlation. To assess relationships with clinical risk factors, prevalent health conditions, and mortality outcomes, i.FCS was evaluated by each quintile and per each standard deviation (SD) unit. We used survey-weighted linear regressions with robust standard errors to estimate the association of i.FCS with continuous risk factors; and survey-weighted logistic regression to estimate the odds ratio (OR) and 95% confidence interval (CI) for the association with prevalent health conditions. Multivariable models were used to minimize potential confounding, with covariates including age and age-squared (continuous), sex, race/ethnicity (non-Hispanic White, non-Hispanic Black, other Hispanic, Mexican-American, Asian/other), education (<high school graduate, high school graduate, some college education, college graduate or more), income (based on family poverty: income ratio,

continuous), smoking status (non-smoker, former, current), alcohol use (percentage energy contribution from alcohol, continuous), total physical activity (MET-hours per week, continuous), and self-reported prevalent diabetes. Detailed information on how these variables were assessed and derived has been reported (2).

Survival analyses used survey-weighted Cox proportional hazard models to estimate the hazard ratio (HR) and 95%CI between i.FCS and risk of all-cause and cause-specific (cardiometabolic and cancer) mortality. Study time was used as the time variable. Participants contributed person-time from the time of their enrolment until death or end-off follow-up on January 1, 2019, whichever came first. We censored early deaths within 3 months of baseline, to minimize reverse causation.

Multivariable models were adjusted as described above for the cross-sectional analyses. The proportional hazards assumption was assessed with visual Kaplan-Meier plots and statistical testing of Schoenfeld residuals (and not rejected if  $p > 0.05$ ), adjusted for age and age-squared (continuous).

All analyses incorporated NHANES dietary sample weights to account for the complex survey design and response rates and provide nationally representative estimates for the non-institutionalized U.S. population. Statistical significance was defined as two-tailed  $\alpha=0.05$ .



## **Supplementary Methods 2. Missing attribute values in FNDDS 2001-2018 for nutrient profiling**

Iodine and trans fats attributes were missing across the entire FNDDS 2001-2018 database, and so were excluded from the scoring of Food Compass in this report. Artificial sweeteners, flavors or colors, partially hydrogenated oils, interesterified or hydrogenated oils, high fructose corn syrup and monosodium glutamate (MSG) attributes were included in scoring in this analysis for items that could be manually matched to a branded food or beverage (n=321, ~95% of all branded items in FNDDS), where the branded item's ingredient list was used to code these attributes.

For total flavonoids, vitamin D, and choline attributes, values were missing for products only in certain survey cycles. Where unique food codes had attribute data available in one or more cycles of the FNDDS database, the attribute value per standard quantity in the most proximal year available was carried backwards or forwards to any year with a missing attribute value. For products without any attribute data available across any database editions, predictive mean matching (PMM) imputation was used to address the remaining missing values. The details of PMM approach used have been published (2).

**Table S9. Domains and attributes of the Food Compass 2.0\*†**

| Nutrient Ratios                    | Vitamins (top 5) | Minerals (top 5) | Food-based Ingredients                        | Additives                                 | Processing          | Specific Lipids (0.5 weight) (top 3) | Fiber & Protein | Phytochemicals (0.5 weight) |
|------------------------------------|------------------|------------------|-----------------------------------------------|-------------------------------------------|---------------------|--------------------------------------|-----------------|-----------------------------|
| Unsaturated: Saturated fat ratio # | Vitamin A        | Calcium          | Fruits (non-dried and dried)                  | Added sugar                               | NOVA classification | ALA                                  | Total fiber     | Total flavonoids            |
| Fiber: Carbohydrate ratio          | Thiamin (B1)     | Phosphorus       | Vegetables, non-starchy (non-dried and dried) | Nitrites                                  | Fermentation        | EPA + DHA                            | Total protein   | Total carotenoids           |
| Potassium: Sodium ratio            | Riboflavin (B2)  | Magnesium        | Beans & legumes                               | Artificial sweeteners, flavors, or colors | Frying              | Medium-chain fatty acids (MCFA)      |                 |                             |
|                                    | Niacin (B3)      | Iron             | Whole grains                                  | Partially hydrogenated oils               |                     | Dietary cholesterol                  |                 |                             |
|                                    | Vitamin B6       | Zinc             | Nuts and seeds                                | Interesterified or hydrogenated oils      |                     | Trans fats §                         |                 |                             |
|                                    | Folate (B9)      | Copper           | Seafood                                       | High fructose corn syrup                  |                     |                                      |                 |                             |
|                                    | Cobalamin (B12)  | Selenium         | Yogurt                                        | Monosodium glutamate (MSG)                |                     |                                      |                 |                             |
|                                    | Vitamin C        | Sodium           | Plant oils                                    |                                           |                     |                                      |                 |                             |
|                                    | Vitamin D        | Potassium        | Refined carbohydrates                         |                                           |                     |                                      |                 |                             |
|                                    | Vitamin E        | Iodine §         | Red or processed Meat                         |                                           |                     |                                      |                 |                             |
|                                    | Vitamin K        |                  |                                               |                                           |                     |                                      |                 |                             |
|                                    | Choline          |                  |                                               |                                           |                     |                                      |                 |                             |

\*The Food Compass incorporates 54 individual attributes across 9 domains, each assessed per 100 kcal (418.4 kJ) of food product. Attributes are scored across a 10-point range (0 to 10 for beneficial factors; -10 to 0 for harmful factors; and -10 to 10 for nutrient ratios which could range from harmful to beneficial). Attributes with emerging evidence for health impacts, including frying, fermentation, alpha-linoleic acid (ALA), medium-chain fatty acids (MCFAs), dietary cholesterol and total protein, were scored using half weights. Five additives with emerging evidence (all besides added sugar and nitrates) were each scored as -1 (additive present) or 0 (additive not present) for a maximum contribution of -5. Each domain then received a score, calculated as the average of all attributes in that domain (or for food ingredients, as the sum, given contents of ingredients are interdependent). For 3 domains (vitamins, minerals, specific lipids), the highest (absolute value, i.e. negative or positive) 5, 5, and 3 scores, respectively, were calculated. First, many foods with health impacts are rich in one or just a few, but not

numerous, vitamins, minerals, or specific lipids. Thus, averaging attribute scores across all 12 vitamins, for example, would incorporate many very low or zero values, causing this domain to be scored more similarly for most foods and weakening its discrimination of healthful foods with naturally higher levels of a few vitamins. Second, at the other extreme, the scoring approach for these domains constrained the potential impact of excessive fortification of multiple different vitamins, minerals, or specific lipids during processing. All domains scores were then summed, using equal weights for all domains except specific lipids and phytochemicals, where half weights were used. The final Food Compass score (FCS) was scaled across all food and beverage items to range from 1 (least healthful) to 100 (most healthful). For full scoring details of each attribute and the scaling of the final sum, see Table S10.

† Several important nutritional factors are represented in the scoring in more than one way. For example, the relative amount of unsaturated fat, as compared to saturated fat, is represented as a ratio in the Nutrient Ratios domain, while the absolute content of plant oils, rich in plant sources of unsaturated fat, is represented in the Food Ingredients domain. Potassium and sodium were included both as Nutrient Ratios given evidence for their biologic interaction, and separately as Minerals given evidence that their absolute intakes also influence health. Carbohydrate and fiber were included as Nutrient Ratios given evidence that their ratio predicts healthfulness of carbohydrate-rich foods; and separately as total fiber (in Fiber & Protein) given evidence that the absolute intake of dietary fiber, but not total carbohydrate, influences health. Partially hydrogenated oils (emerging, scored with a half-weight) were included in addition to trans fats content (scored -10 to 0 in Specific Lipids) based on emerging evidence that industrial trans fats may have greater adverse health effects than naturally occurring trans fats; and that presence of such partially hydrogenated oils may serve as a marker of more intensive and potentially adverse industrial processing.

# Dairy products (yogurt, cheeses, milk, and dairy fats) are given half weight for the scoring of the Unsaturated: saturated fat ratio within the Nutrient Ratio domain as the evidence for harmful health effects of saturated fat from dairy is less certain.

§ Iodine and trans fats were excluded from scoring in this analysis, as these attributes are not available within in the available USDA databases used (FNDDS, FPED, flavonoid database). Artificial sweeteners, flavors, or colors, partially hydrogenated oils, interesterified or hydrogenated oils, high fructose corn syrup and monosodium glutamate (MSG) were included in scoring in this analysis only for items that could be manually matched to a branded food or beverage (n=321), where the branded item's ingredient list could be used to code these attributes.

ALA, alpha-linolenic acid. EPA + DHA, eicosapentaenoic acid + docosahexaenoic acid.

**Table S10. Scoring principles for the 54 attributes within 9 domains of the Food Compass 2.0\***

| Attributes (per 100 kcal [418.4 kJ])  | Attribute Points | Target for low score | Target for high score | Target Reference† |
|---------------------------------------|------------------|----------------------|-----------------------|-------------------|
| <b>Nutrient Ratios ‡</b>              |                  |                      |                       |                   |
| Unsaturated:Saturated fat ratio (log) | -10 to 10        | -0.66                | 1.77                  | 5th, 95th pctl    |
| Fiber:Carbohydrate ratio (log)        | -10 to 10        | -7.02                | -0.78                 | 5th, 95th pctl    |
| Potassium:Sodium ratio (log)          | -10 to 10        | -2.02                | 3.30                  | 5th, 95th pctl    |
| <b>Vitamins (top 5) §</b>             |                  |                      |                       |                   |
| Vitamin A, RAE                        | 0 to 10          | 0                    | 225 ug                | 25% RDA           |
| Thiamin (B1)                          | 0 to 10          | 0                    | 0.3 mg                | 25% RDA           |
| Riboflavin (B2)                       | 0 to 10          | 0                    | 0.325 mg              | 25% RDA           |
| Niacin (B3)                           | 0 to 10          | 0                    | 4 mg                  | 25% RDA           |
| Vitamin B-6                           | 0 to 10          | 0                    | 0.325 mg              | 25% RDA           |
| Folate, DFE (B9)                      | 0 to 10          | 0                    | 100 ug                | 25% RDA           |
| Cobalamin (B12)                       | 0 to 10          | 0                    | 0.6 ug                | 25% RDA           |
| Vitamin C                             | 0 to 10          | 0                    | 22.5 mg               | 25% RDA           |
| Vitamin D (D2 + D3)                   | 0 to 10          | 0                    | 3.75 ug               | 25% RDA           |
| Vitamin E (alpha-tocopherol)          | 0 to 10          | 0                    | 3.75 mg               | 25% RDA           |
| Vitamin K (phylloquinone)             | 0 to 10          | 0                    | 30 ug                 | 25% AI            |
| Choline, total                        | 0 to 10          | 0                    | 137.5 mg              | 25% AI            |
| <b>Minerals (top 5) §</b>             |                  |                      |                       |                   |
| Calcium                               | 0 to 10          | 0                    | 250 mg                | 25% RDA           |
| Phosphorus                            | 0 to 10          | 0                    | 175 mg                | 25% RDA           |
| Magnesium                             | 0 to 10          | 0                    | 105 mg                | 25% RDA           |
| Iron                                  | 0 to 10          | 0                    | 4.5 mg                | 25% RDA           |
| Zinc                                  | 0 to 10          | 0                    | 2.75 mg               | 25% RDA           |
| Copper                                | 0 to 10          | 0                    | 0.225 mg              | 25% RDA           |
| Selenium                              | 0 to 10          | 0                    | 13.75 ug              | 25% RDA           |
| Sodium                                | -10 to 0         | 575 mg               | 0                     | 25% RDA           |
| Potassium                             | 0 to 10          | 0                    | 1175 mg               | 25% RDA           |

|                                               |                 |         |           |           |
|-----------------------------------------------|-----------------|---------|-----------|-----------|
| Iodine                                        | 0 to 10         | 0       | 37.5 ug   | 25% RDA   |
| <b>Food Ingredients (sum) II</b>              |                 |         |           |           |
| Fruits                                        | 0 to 10         | 0       | 1.75 cups | 95th pctl |
| Fruits, dried                                 | 0 to 10         | 0       | 0.75 cups | 95th pctl |
| Vegetables, non-starchy                       | 0 to 10         | 0       | 4.77 cups | 95th pctl |
| Vegetables, non-starchy & dried               | 0 to 10         | 0       | 4.18 cups | 95th pctl |
| Beans and legumes                             | 0 to 10         | 0       | 0.50 cups | 95th pctl |
| Whole grains                                  | 0 to 10         | 0       | 1.12 oz   | 95th pctl |
| Nuts and seeds                                | 0 to 10         | 0       | 1.35 oz   | 95th pctl |
| Seafood                                       | 0 to 10         | 0       | 3.86 oz   | 95th pctl |
| Yogurt                                        | 0 to 10         | 0       | 0.81 cups | 95th pctl |
| Plant Oils                                    | 0 to 10         | 0       | 11.31 g   | 95th pctl |
| Refined carbohydrates                         | -10 to 0        | 1.36 oz | 0         | 95th pctl |
| Red or processed meat                         | -10 to 0        | 2.69 oz | 0         | 95th pctl |
| <b>Additives ¶</b>                            |                 |         |           |           |
| Added sugar, % calories                       | -10 to 0        | 60%     | 0         |           |
| Nitrites, % calories from processed meats     | -10 to 0        | 25%     | 0         |           |
| Artificial sweeteners, flavors, or colors     | -1, 0           | yes     | no        |           |
| Partially hydrogenated oils                   | -1, 0           | yes     | no        |           |
| Interesterified or hydrogenated oils          | -1, 0           | yes     | no        |           |
| High fructose corn syrup                      | -1, 0           | yes     | no        |           |
| Monosodium glutamate (MSG)                    | -1, 0           | yes     | no        |           |
| <b>Processing €</b>                           |                 |         |           |           |
| NOVA processing level                         | -10, 5, 7.5, 10 | NOVA=4  | NOVA=1    |           |
| Fermentation, % calories from fermented foods | 0 to 10         | 0       | 50%       |           |
| Frying                                        | -10, 0          | yes     | no        |           |
| <b>Specific Lipids (top 3) ¥</b>              |                 |         |           |           |
| Cholesterol                                   | -10 to 0        | 75 mg   | 0         | 25% DGA   |
| MCFAs (8:0 + 10:0 + 12:0, g)                  | 0 to 10         | 0       | 0.32 g    | 95th pctl |
| ALA (18:3n-3)                                 | 0 to 10         | 0       | 0.4 g     | 25% AI    |

|                               |          |     |             |                  |
|-------------------------------|----------|-----|-------------|------------------|
| EPA + DHA (20:5n-3 + 22:6n-3) | 0 to 10  | 0   | 62.5 mg     | 25% REC          |
| Trans fats, % calories        | -10 to 0 | 30% | 0           | expert consensus |
| <b>Fiber &amp; Protein #</b>  |          |     |             |                  |
| Total fiber                   | 0 to 10  | 0   | 9.5 g       | 25% AI           |
| Total protein                 | 0 to 10  | 0   | 14 g        | 25% RDA          |
| <b>Phytochemicals §</b>       |          |     |             |                  |
| Total flavonoids              | 0 to 10  | 0   | 23.53 mg    | 95th pctl        |
| Total carotenoids             | 0 to 10  | 0   | 8746.81 mcg | 95th pctl        |

\* Each domain score was calculated as the average of the attribute scores in that domain (or the sum for the food ingredient domain), and the 9 domain scores were summed (with half-weights for specific lipids and phytochemicals). To minimize the influence of outliers, the range of summed scores across all 58,618 scored food and beverage items (FNDDS 2001-2018) was first truncated at the 5<sup>th</sup> and 95<sup>th</sup> percentiles (-12.1, 35.0). The final Food Compass Score (FCS) was then scaled across all food and beverage items to range from 1 (least healthful) to 100 (most healthful) using the equation:  $FCS = [100 - (((\text{max score} - \text{unscaled score}) / \text{score range})) * 99]$ , or  $[100 - (((35.0 - \text{unscaled score}) / 47.1)) * 99]$ .

† When Dietary Reference Intakes (DRIs) varied by population subgroup, the DRI was selected for adults age 19-50 years (and for men when varying by sex). Across attributes, the 25% threshold for DRIs was identified as most consistently distinguishing foods with higher vs. lower levels of these nutrients and was generally similar to the 95% percentile value of content across all foods and beverages reported in NHANES 2015-16. For attributes without DRIs, scoring was based on the distributions of relevant, unique food and beverage items reported in FNDDS 2001-2018. Whether scoring should remain constant for other datasets and nations, or vary according to the local food items, is a topic for further investigation.

‡ Nutrient ratios were each scored on a log-linear scale from -10 to 10. To prevent excessive scoring influence of small amounts of these nutrients in any food item, the unsaturated: saturated fat ratio was not calculated for items with <10% energy from fat; the fiber: carbohydrate ratio, for items with <10% energy from carbohydrate; and potassium: sodium ratio, for items with <10 mg of potassium and sodium per 100 kcal. Dairy products (yogurt, cheeses, milk, and dairy fats) are given half weight for the scoring of the Unsaturated: saturated fat ratio within the Nutrient Ratio domain as the evidence for harmful health effects of saturated fat from dairy is less certain. Absolute levels of fiber were also separately included under Fiber & Protein; and of potassium and sodium, under Minerals; to capture their separate health effects independent of these interactions represented by the ratios.

§ Vitamins, minerals, flavonoids, and carotenoids were each scored on a linear scale from 0 to 10, except sodium which was scored on a linear scale from -10 to 0.

|| Food-based ingredients were each scored on a linear scale from 0 to 10 for healthful ingredients and from -10 to 0 for harmful ingredients (refined carbohydrates, red or processed meat). Refined carbohydrates was defined as the sum of refined grains and added sugars. The 95<sup>th</sup> percentile for each food-based ingredient was calculated based on a subset of relevant foods assessed (i.e. yogurt for the food-based yogurt attribute). Separate 95<sup>th</sup> percentile values were calculated and used for dried vs. non-dried fruits and dried vs. non-dried, non-starchy vegetables given their different water weights. The attribute scores in this domain were summed (not averaged), because contents of each ingredient are mutually interdependent.

¶¶ Because added sugar content is nonlinear (skewed) across the food supply, it was scored as follows: 0 (0% calories), -1 (<2.5% calories), -2 (<5% calories), -3 (<10% calories), -4 (<15% calories), -5 (<20% calories), -6 (<30% calories), -7 (<40% calories), -8 (<50% calories), -9 (<60% calories), and -10 (≥60% calories). As no threshold has been set for nitrate content, nitrites were scored using percentage energy from processed/cured meats as a proxy. 50% energy from processed/cured meat was assigned the target low score (-10), with linear scaling down to 0% energy from processed/cured meats as the target high score (0). For calculating the domain score, added sugar and nitrites, considered to have stronger evidence for health harms, were each

provided a full weight, while the remaining additives, considered to have emerging and less robust evidence for independent health harms based on more limited studies, were each scored as -1 (additive present) or 0 (additive not present) for a maximum contribution of -5.

€ The NOVA processing classification was scored as -10, 5, 7.5, and 10 for the 4 categories of ultra-processed, processed, culinary ingredients, and un-processed/minimally foods, respectively. For mixed dishes (about 2/3 of all products), NOVA classification was calculated based on an energy-weighted score of the constituent ingredients' NOVA classification, leading to non-integer NOVA classification values. As such, attribute scores for NOVA classification were linearly scaled between the integer NOVA classes 1-4. Fermentation was defined based on energy content from yogurt or cheese. 50% energy from yogurt + cheese was assigned the target high score (10), with linear scaling down to 0% energy from yogurt or cheese as the target low score (0). Additionally, other fermented products were identified by keyword search (i.e., kefir, kombucha, injera, dosa, natto, miso, kimchi, etc.) and assigned the target high score. Frying was defined based on the name and/or cooking description of each food item (e.g., "fried catfish"). For calculating the domain score, the NOVA classification system, considered to have stronger evidence for health harms, was provided a full weight, while fermentation and frying, considered to have emerging and less robust evidence for independent health harms based on more limited studies, were each provided a half weight.

¥ Specific lipids were each scored on a linear scale from 0 to 10 (ALA, EPA+DHA, MCFA) or -10 to 0 (cholesterol, trans fats). For calculating the domain score, ALA, MCFA and cholesterol content were considered to have emerging or less robust evidence for independent health harms and were provided a half weight.

# Fiber and protein were each scored on a linear scale from 0 to 10. For calculating the domain score, protein content was considered to have less robust evidence for independent health harms based on more limited studies and was provided a half weight.

AI, adequate intake. ALA, alpha-linolenic acid. DGA, dietary guidelines for Americans. EPA + DHA, eicosapentaenoic acid + docosahexaenoic acid. MCFAs, medium-chain fatty acids. Pctl, percentile. RDA, recommended daily allowance. REC, dietary recommendation. UL, upper limit intake.

## Supplementary References

1. Mozaffarian D, El-Abbadi NH, O’Hearn M, Erndt-Marino J, Masters WA, Jacques P, et al. Food Compass is a nutrient profiling system using expanded characteristics for assessing healthfulness of foods. *Nature Food* 2021;2(10):809-18. doi: 10.1038/s43016-021-00381-y.
2. O’Hearn M, Erndt-Marino J, Gerber S, Lauren BN, Economos C, Wong JB, et al. Validation of Food Compass with a healthy diet, cardiometabolic health, and mortality among U.S. adults, 1999–2018. *Nature Communications* 2022;13(1):7066. doi: 10.1038/s41467-022-34195-8.
3. Monteiro CA, Cannon G, Levy RB, Moubarac JC, Louzada ML, Rauber F, et al. Ultra-processed foods: what they are and how to identify them. *Public Health Nutr* 2019;22(5):936-41. doi: 10.1017/s1368980018003762.
4. Merz B, Temme E, Alexiou H, Beulens JWJ, Buyken AE, Bohn T, et al. Nutri-Score 2023 update. *Nat Food* 2024;5(2):102-10. doi: 10.1038/s43016-024-00920-3.
5. Department of Health. Health Star Rating system Calculator and Style Guide. Internet: <http://healthstarrating.gov.au/internet/healthstarrating/publishing.nsf/Content/guide-for-industry> (accessed March 29 2023).
6. Moshfegh AJ, Rhodes DG, Baer DJ, Murayi T, Clemens JC, Rumpler WV, et al. The US Department of Agriculture Automated Multiple-Pass Method reduces bias in the collection of energy intakes. *Am J Clin Nutr* 2008;88(2):324-32. doi: 10.1093/ajcn/88.2.324.
7. National Center for Health Statistics Centers for Disease Control and Prevention. 2015 Public-Use Linked Mortality Files. Internet: <https://www.cdc.gov/nchs/data-linkage/mortality-public.htm> (accessed 1 August 2023).



| Foodcode | Description                                                            | Food group  | FCS 2.0 | FCS 1.0 | Difference | NOVA <sup>a</sup> | HSR | Nutri-Score |
|----------|------------------------------------------------------------------------|-------------|---------|---------|------------|-------------------|-----|-------------|
| 56204005 | Quinoa, no added fat                                                   | 1000_Grains | 89      | 88      | 1          | 1                 | 4   | A           |
| 57408100 | Cereal (Uncle Sam)                                                     | 1000_Grains | 85      | 97      | -12        | 4                 | 5   | A           |
| 56200350 | Cereal, cooked, instant, NS as to grain                                | 1000_Grains | 84      | 94      | -10        | 4                 | 4   | A           |
| 56102020 | Macaroni, whole wheat, cooked, fat added in cooking                    | 1000_Grains | 82      | 81      | 1          | 1                 | 4   | B           |
| 56133010 | Spaghetti, cooked, whole wheat, fat added in cooking                   | 1000_Grains | 82      | 81      | 1          | 1                 | 4   | B           |
| 56102000 | Macaroni, whole wheat, cooked, NS as to fat added in cooking           | 1000_Grains | 82      | 79      | 3          | 1                 | 4   | A           |
| 56102010 | Macaroni, whole wheat, cooked, fat not added in cooking                | 1000_Grains | 82      | 79      | 3          | 1                 | 4   | A           |
| 56113000 | Noodles, whole grain, cooked                                           | 1000_Grains | 82      | 79      | 3          | 1                 | 4   | A           |
| 56113010 | Noodles, cooked, whole wheat, fat not added in cooking                 | 1000_Grains | 82      | 79      | 3          | 1                 | 4   | A           |
| 56132990 | Pasta, whole grain, cooked                                             | 1000_Grains | 82      | 79      | 3          | 1                 | 4   | A           |
| 56133000 | Spaghetti, cooked, whole wheat, fat not added in cooking               | 1000_Grains | 82      | 79      | 3          | 1                 | 4   | A           |
| 57311700 | Nu System Cuisine Toasted Grain Circles                                | 1000_Grains | 81      | 92      | -11        | 4                 | 4   | C           |
| 56203056 | Oatmeal, regular or quick, made with water, no added fat               | 1000_Grains | 81      | 81      | 0          | 3                 | 4   | A           |
| 56204000 | Quinoa, NS as to fat                                                   | 1000_Grains | 81      | 80      | 1          | 2                 | 3.5 | B           |
| 56204010 | Quinoa, fat added                                                      | 1000_Grains | 81      | 80      | 1          | 2                 | 3.5 | B           |
| 57401100 | Cereal, toasted oat                                                    | 1000_Grains | 80      | 91      | -11        | 4                 | 4   | C           |
| 55601000 | Flour and milk patty                                                   | 1000_Grains | 80      | 79      | 1          | 1                 | 3.5 | C           |
| 57000100 | Cereal, oat, NFS                                                       | 1000_Grains | 79      | 89      | -10        | 4                 | 4.5 | C           |
| 56200300 | Cereal, cooked, NFS                                                    | 1000_Grains | 79      | 76      | 3          | 1                 | 4   | A           |
| 57000000 | Cereal, NFS                                                            | 1000_Grains | 78      | 89      | -11        | 4                 | 4   | C           |
| 56200510 | Buckwheat groats, fat added                                            | 1000_Grains | 78      | 78      | 0          | 2                 | 4   | B           |
| 56202980 | Oatmeal, cooked, regular, NS as to fat added in cooking                | 1000_Grains | 78      | 75      | 3          | 1                 | 3.5 | B           |
| 56203010 | Oatmeal, cooked, regular, fat not added in cooking                     | 1000_Grains | 78      | 75      | 3          | 1                 | 3.5 | B           |
| 56207110 | Bulgur, no added fat                                                   | 1000_Grains | 78      | 71      | 7          | 1                 | 4   | A           |
| 56207130 | Bulgur, NS as to fat                                                   | 1000_Grains | 78      | 71      | 7          | 1                 | 4   | A           |
| 57123000 | Cereal (General Mills Cheerios)                                        | 1000_Grains | 77      | 89      | -12        | 4                 | 4.5 | C           |
| 57306120 | Malt-O-Meal Puffed Wheat                                               | 1000_Grains | 77      | 86      | -9         | 4                 | 5   | A           |
| 57416000 | Cereal, puffed wheat, plain                                            | 1000_Grains | 77      | 86      | -9         | 4                 | 5   | A           |
| 56205205 | Rice, wild, 100%, cooked, NS as to fat                                 | 1000_Grains | 77      | 77      | 0          | 1                 | 3.5 | B           |
| 56205215 | Rice, wild, 100%, cooked, fat added                                    | 1000_Grains | 77      | 77      | 0          | 1                 | 3.5 | B           |
| 56207120 | Bulgur, fat added                                                      | 1000_Grains | 77      | 76      | 1          | 2                 | 4   | B           |
| 56200490 | Buckwheat groats, NS as to fat                                         | 1000_Grains | 77      | 73      | 4          | 1                 | 4   | B           |
| 56200500 | Buckwheat groats, no added fat                                         | 1000_Grains | 77      | 73      | 4          | 1                 | 4   | B           |
| 57306700 | Cereal (Malt-O-Meal Toasted Oat Cereal)                                | 1000_Grains | 75      | 89      | -14        | 4                 | 4.5 | C           |
| 57206700 | Cereal (General Mills Fiber One)                                       | 1000_Grains | 75      | 82      | -7         | 4                 | 5   | A           |
| 57101020 | All-Bran with Extra Fiber                                              | 1000_Grains | 75      | 78      | -3         | 4                 | 5   | A           |
| 51201060 | Bread, whole wheat, 100%, made from home recipe or purchased at bakery | 1000_Grains | 75      | 73      | 2          | 1                 | 4   | C           |

|          |                                                                                 |             |    |    |     |   |     |   |
|----------|---------------------------------------------------------------------------------|-------------|----|----|-----|---|-----|---|
| 51201070 | Bread, whole wheat, 100%, made from home recipe or purchased at bakery, toasted | 1000_Grains | 75 | 73 | 2   | 1 | 4   | C |
| 51300140 | Bread, whole wheat, made from home recipe or purchased at bakery                | 1000_Grains | 75 | 73 | 2   | 1 | 4   | C |
| 51300150 | Bread, whole wheat, made from home recipe or purchased at bakery, toasted       | 1000_Grains | 75 | 73 | 2   | 1 | 4   | C |
| 57305215 | Cereal (Malt-O-Meal Frosted Mini Spooners)                                      | 1000_Grains | 74 | 88 | -14 | 4 | 4.5 | B |
| 56203510 | Oatmeal, reduced sugar, plain, no added fat                                     | 1000_Grains | 74 | 77 | -3  | 3 | 3.5 | C |
| 56203555 | Oatmeal, reduced sugar, flavored, no added fat                                  | 1000_Grains | 74 | 77 | -3  | 3 | 3.5 | C |
| 56203000 | Oatmeal, NS as to regular, quick, or instant, no added fat                      | 1000_Grains | 74 | 74 | 0   | 3 | 4   | A |
| 57000050 | Kashi cereal, NS as to ready to eat or cooked                                   | 1000_Grains | 73 | 81 | -8  | 4 | 5   | A |
| 56203076 | Oatmeal, regular or quick, made with non-dairy milk, no added fat               | 1000_Grains | 73 | 74 | -1  | 3 | 3.5 | B |
| 56205210 | Rice, wild, 100%, cooked, no added fat                                          | 1000_Grains | 73 | 71 | 2   | 1 | 3.5 | B |
| 56205340 | Rice, brown and wild, cooked, fat added                                         | 1000_Grains | 73 | 71 | 2   | 1 | 3.5 | B |
| 56203200 | Oatmeal with fruit, cooked                                                      | 1000_Grains | 73 | 69 | 4   | 1 | 3.5 | B |
| 57301500 | Cereal (Kashi 7 Whole Grain Puffs)                                              | 1000_Grains | 72 | 80 | -8  | 4 | 5   | A |
| 56205012 | Rice, brown, cooked, fat added, made with oil                                   | 1000_Grains | 72 | 71 | 1   | 1 | 3.5 | B |
| 55105210 | Pancakes, whole wheat, fat free                                                 | 1000_Grains | 72 | 66 | 6   | 1 | 3.5 | C |
| 56203050 | Oatmeal, cooked, regular, fat added in cooking                                  | 1000_Grains | 71 | 70 | 1   | 2 | 3.5 | B |
| 56203066 | Oatmeal, regular or quick, made with milk, no added fat                         | 1000_Grains | 71 | 70 | 1   | 3 | 3.5 | B |
| 57417000 | Cereal (Post Shredded Wheat)                                                    | 1000_Grains | 70 | 79 | -9  | 4 | 5   | A |
| 57341000 | Cereal (Post Shredded Wheat'n Bran)                                             | 1000_Grains | 70 | 78 | -8  | 4 | 5   | A |
| 56205016 | Rice, brown, cooked, made with margarine                                        | 1000_Grains | 70 | 68 | 2   | 1 | 3.5 | B |
| 56205510 | Rice, brown, cooked, regular, fat added in cooking                              | 1000_Grains | 70 | 67 | 3   | 1 | 3.5 | C |
| 57214000 | Cereal (Kellogg's Frosted Mini-Wheats)                                          | 1000_Grains | 69 | 82 | -13 | 4 | 4.5 | B |
| 57231250 | Cereal (Post Great Grains Double Pecan Whole Grain Cereal)                      | 1000_Grains | 69 | 78 | -9  | 4 | 4   | C |
| 51807000 | Injera, Ethiopian bread                                                         | 1000_Grains | 69 | 76 | -7  | 4 | 3.5 | B |
| 56203211 | Oatmeal, cooked, regular, made with milk, fat not added in cooking              | 1000_Grains | 69 | 65 | 4   | 1 | 3.5 | B |
| 56203231 | Oatmeal, cooked, regular, made with milk, NS as to fat added in cooking         | 1000_Grains | 69 | 65 | 4   | 1 | 3.5 | B |
| 56205018 | Rice, brown, cooked, no added fat                                               | 1000_Grains | 69 | 65 | 4   | 1 | 3.5 | B |
| 56205310 | Rice, brown and wild, cooked, no added fat                                      | 1000_Grains | 69 | 65 | 4   | 1 | 3.5 | B |
| 57347500 | Strawberry Squares Mini-Wheats, Kellogg's (formerly Strawberry Squares)         | 1000_Grains | 68 | 83 | -15 | 4 | 4   | B |
| 56203086 | Oatmeal, instant, plain, made with water, no added fat                          | 1000_Grains | 68 | 74 | -6  | 4 | 4   | A |
| 56202100 | Millet, fat added                                                               | 1000_Grains | 68 | 67 | 1   | 2 | 3.5 | B |
| 56203221 | Oatmeal, cooked, regular, made with milk, fat added in cooking                  | 1000_Grains | 68 | 66 | 2   | 1 | 3.5 | C |
| 56205017 | Rice, brown, cooked, fat added, NS as to fat type                               | 1000_Grains | 68 | 65 | 3   | 1 | 3.5 | B |
| 56205550 | Rice, brown, cooked, instant, fat added in cooking                              | 1000_Grains | 68 | 65 | 3   | 1 | 3.5 | C |
| 56201990 | Millet, NS as to fat                                                            | 1000_Grains | 68 | 64 | 4   | 1 | 3.5 | B |
| 56202000 | Millet, no added fat                                                            | 1000_Grains | 68 | 64 | 4   | 1 | 3.5 | B |
| 56205011 | Rice, brown, cooked, NS as to fat                                               | 1000_Grains | 68 | 64 | 4   | 1 | 3.5 | B |

|          |                                                                                             |             |    |    |     |   |     |   |
|----------|---------------------------------------------------------------------------------------------|-------------|----|----|-----|---|-----|---|
| 57406100 | Cereal (General Mills Total)                                                                | 1000_Grains | 67 | 79 | -12 | 4 | 4   | C |
| 57106050 | Cereal (Post Great Grains Banana Nut Crunch)                                                | 1000_Grains | 67 | 76 | -9  | 4 | 4   | C |
| 55105000 | Pancakes, buckwheat                                                                         | 1000_Grains | 67 | 68 | -1  | 3 | 3.5 | C |
| 56203075 | Oatmeal, regular or quick, made with non-dairy milk, NS as to fat                           | 1000_Grains | 67 | 67 | 0   | 3 | 3.5 | B |
| 56203077 | Oatmeal, regular or quick, made with non-dairy milk, fat added                              | 1000_Grains | 67 | 67 | 0   | 3 | 3.5 | B |
| 57208000 | Cereal (Kellogg's All-Bran Complete Wheat Flakes)                                           | 1000_Grains | 66 | 74 | -8  | 4 | 3.5 | D |
| 55300060 | French toast, from school, NFS [whole grain]                                                | 1000_Grains | 66 | 69 | -3  | 4 | 4   | C |
| 55301048 | French toast sticks, from school, NFS [whole grain]                                         | 1000_Grains | 66 | 69 | -3  | 4 | 4   | C |
| 56117010 | Long rice noodles (made from mung beans), cooked, fat added in cooking                      | 1000_Grains | 66 | 65 | 1   | 1 | 4   | B |
| 56202900 | Oatmeal, from fast food, plain                                                              | 1000_Grains | 66 | 62 | 4   | 1 | 3.5 | B |
| 56205110 | Rice, brown, cooked, regular, fat not added in cooking                                      | 1000_Grains | 66 | 61 | 5   | 1 | 3.5 | C |
| 56205120 | Rice, brown, cooked, regular, NS as to fat added in cooking                                 | 1000_Grains | 66 | 61 | 5   | 1 | 3.5 | C |
| 56205530 | Rice, brown, cooked, instant, NS as to fat added in cooking                                 | 1000_Grains | 66 | 61 | 5   | 1 | 3.5 | C |
| 56205540 | Rice, brown, cooked, instant, fat not added in cooking                                      | 1000_Grains | 66 | 61 | 5   | 1 | 3.5 | C |
| 56203106 | Oatmeal, instant, plain, made with non-dairy milk, no added fat                             | 1000_Grains | 65 | 73 | -8  | 4 | 3.5 | B |
| 57231200 | Cereal (Post Great Grains Raisins, Dates, and Pecans)                                       | 1000_Grains | 65 | 73 | -8  | 4 | 4   | C |
| 57308150 | Mueslix cereal, NFS                                                                         | 1000_Grains | 65 | 73 | -8  | 4 | 4   | C |
| 57308190 | Cereal, muesli                                                                              | 1000_Grains | 65 | 73 | -8  | 4 | 4   | C |
| 57411000 | Cereal (General Mills Chex Wheat)                                                           | 1000_Grains | 65 | 73 | -8  | 4 | 4   | C |
| 57301505 | Cereal (Kashi Autumn Wheat)                                                                 | 1000_Grains | 65 | 72 | -7  | 4 | 5   | A |
| 57103050 | Amaranth Flakes                                                                             | 1000_Grains | 65 | 71 | -6  | 4 | 5   | A |
| 56203055 | Oatmeal, regular or quick, made with water, NS as to fat                                    | 1000_Grains | 65 | 63 | 2   | 3 | 4   | B |
| 56203057 | Oatmeal, regular or quick, made with water, fat added                                       | 1000_Grains | 65 | 63 | 2   | 3 | 4   | B |
| 53710810 | Cereal or granola bar (KIND Fruit and Nut Bar)                                              | 1000_Grains | 64 | 73 | -9  | 4 | 4   | D |
| 53713010 | Cereal or granola bar, fruit and nut                                                        | 1000_Grains | 64 | 73 | -9  | 4 | 4   | D |
| 56203220 | Oatmeal, NS as to regular, quick, or instant, made with milk, fat added in cooking          | 1000_Grains | 64 | 65 | -1  | 3 | 3.5 | C |
| 56203210 | Oatmeal, NS as to regular, quick, or instant, made with milk, fat not added in cooking      | 1000_Grains | 64 | 63 | 1   | 3 | 3.5 | B |
| 56203230 | Oatmeal, NS as to regular, quick, or instant, made with milk, NS as to fat added in cooking | 1000_Grains | 64 | 63 | 1   | 3 | 3.5 | B |
| 56202960 | Oatmeal, NS as to regular, quick, or instant, NS as to fat                                  | 1000_Grains | 64 | 62 | 2   | 3 | 4   | B |
| 56203040 | Oatmeal, NS as to regular, quick, or instant, fat added                                     | 1000_Grains | 64 | 62 | 2   | 3 | 4   | B |
| 51201020 | Bread, whole wheat, 100%, toasted                                                           | 1000_Grains | 63 | 69 | -6  | 4 | 4.5 | A |
| 56203520 | Oatmeal, reduced sugar, plain, fat added                                                    | 1000_Grains | 63 | 63 | 0   | 3 | 3.5 | C |
| 56203560 | Oatmeal, reduced sugar, flavored, fat added                                                 | 1000_Grains | 63 | 63 | 0   | 3 | 3.5 | C |
| 56203500 | Oatmeal, reduced sugar, plain, NS as to fat                                                 | 1000_Grains | 63 | 62 | 1   | 3 | 3.5 | C |
| 56203550 | Oatmeal, reduced sugar, flavored, NS as to fat                                              | 1000_Grains | 63 | 62 | 1   | 3 | 3.5 | C |
| 56203065 | Oatmeal, regular or quick, made with milk, NS as to fat                                     | 1000_Grains | 63 | 61 | 2   | 3 | 3.5 | C |
| 56203067 | Oatmeal, regular or quick, made with milk, fat added                                        | 1000_Grains | 63 | 61 | 2   | 3 | 3.5 | C |

|          |                                                                                 |             |    |    |     |   |     |   |
|----------|---------------------------------------------------------------------------------|-------------|----|----|-----|---|-----|---|
| 56208500 | Oat bran cereal, cooked, no added fat                                           | 1000_Grains | 63 | 52 | 11  | 1 | 4   | A |
| 57406105 | Total Cranberry Crunch                                                          | 1000_Grains | 62 | 75 | -13 | 4 | 3   | D |
| 57332050 | Cereal (General Mills Total Raisin Bran)                                        | 1000_Grains | 62 | 74 | -12 | 4 | 3   | D |
| 57330000 | Cereal (Kellogg's Raisin Bran)                                                  | 1000_Grains | 62 | 70 | -8  | 4 | 3.5 | D |
| 51201120 | Bread, whole wheat, 100%, with raisins, toasted                                 | 1000_Grains | 62 | 67 | -5  | 4 | 4.5 | C |
| 56207200 | Whole wheat cereal, cooked, no added fat                                        | 1000_Grains | 62 | 67 | -5  | 4 | 3.5 | A |
| 56205350 | Rice, brown and wild, cooked, NS as to fat                                      | 1000_Grains | 62 | 59 | 3   | 1 | 3   | C |
| 58174000 | Upma, Indian breakfast dish                                                     | 1000_Grains | 62 | 59 | 3   | 1 | 3.5 | A |
| 57143500 | Cereal (Post Great Grains, Cranberry Almond Crunch)                             | 1000_Grains | 61 | 73 | -12 | 4 | 4   | C |
| 57160000 | Curves Fruit and Nut Crunch Cereal                                              | 1000_Grains | 61 | 70 | -9  | 4 | 3   | D |
| 57209000 | Cereal (Post Bran Flakes)                                                       | 1000_Grains | 61 | 68 | -7  | 4 | 3.5 | C |
| 71945020 | Yam buns; Puerto Rican style                                                    | 1000_Grains | 61 | 59 | 2   | 2 | 4   | C |
| 56208530 | Oat bran cereal, cooked, made with milk, fat not added in cooking               | 1000_Grains | 61 | 56 | 5   | 1 | 3.5 | C |
| 57125010 | Cereal (General Mills 25% Less Sugar Cinnamon Toast Crunch)                     | 1000_Grains | 60 | 76 | -16 | 4 | 3   | D |
| 57206705 | Cereal (General Mills Fiber One Caramel Delight)                                | 1000_Grains | 60 | 73 | -13 | 4 | 3.5 | D |
| 57241200 | Cereal (Post Shredded Wheat Honey Nut)                                          | 1000_Grains | 60 | 71 | -11 | 4 | 4   | C |
| 57228000 | Granola, homemade                                                               | 1000_Grains | 60 | 70 | -10 | 4 | 3   | C |
| 57418000 | Cereal (General Mills Wheaties)                                                 | 1000_Grains | 60 | 70 | -10 | 4 | 3   | D |
| 57321800 | Optimum Slim, Nature's Path                                                     | 1000_Grains | 60 | 68 | -8  | 4 | 3.5 | C |
| 57207000 | Cereal, bran flakes                                                             | 1000_Grains | 60 | 67 | -7  | 4 | 3.5 | C |
| 51202000 | Muffin, English, whole wheat, 100%                                              | 1000_Grains | 60 | 66 | -6  | 4 | 4   | B |
| 51201110 | Bread, whole wheat, 100%, with raisins                                          | 1000_Grains | 60 | 65 | -5  | 4 | 4   | C |
| 57410000 | Cereal (Weetabix Whole Grain)                                                   | 1000_Grains | 60 | 65 | -5  | 4 | 4.5 | A |
| 56205014 | Rice, brown, cooked, made with butter                                           | 1000_Grains | 60 | 56 | 4   | 1 | 3.5 | C |
| 57307500 | Cereal, millet, puffed                                                          | 1000_Grains | 59 | 67 | -8  | 4 | 4   | A |
| 55101020 | Pancakes, plain, fat free                                                       | 1000_Grains | 59 | 64 | -5  | 4 | 4.5 | A |
| 57101000 | Cereal (Kellogg's All-Bran)                                                     | 1000_Grains | 59 | 62 | -3  | 4 | 5   | C |
| 57103500 | Apple Cinnamon Squares Mini-Wheats, Kellogg's (formerly Apple Cinnamon Squares) | 1000_Grains | 58 | 74 | -16 | 4 | 4   | C |
| 57316385 | Cereal (General Mills Cheerios Protein)                                         | 1000_Grains | 58 | 74 | -16 | 4 | 2.5 | D |
| 57241000 | Cereal (General Mills Cheerios Honey Nut)                                       | 1000_Grains | 58 | 73 | -15 | 4 | 2.5 | D |
| 56203107 | Oatmeal, instant, plain, made with non-dairy milk, fat added                    | 1000_Grains | 58 | 67 | -9  | 4 | 3.5 | B |
| 57308900 | Natural Muesli, Jenny's Cuisine                                                 | 1000_Grains | 58 | 65 | -7  | 4 | 4.5 | A |
| 91781010 | Snickers Marathon Protein bar                                                   | 1000_Grains | 58 | 65 | -7  | 4 | 2.5 | D |
| 51201010 | Bread, whole wheat, 100%                                                        | 1000_Grains | 58 | 64 | -6  | 4 | 4   | B |
| 57102000 | Cereal (Alpen)                                                                  | 1000_Grains | 58 | 64 | -6  | 4 | 4.5 | A |
| 57318000 | 100% Bran                                                                       | 1000_Grains | 58 | 63 | -5  | 4 | 4.5 | C |
| 41435300 | Balance Original Bar                                                            | 1000_Grains | 57 | 75 | -18 | 4 | 2.5 | D |
| 57308400 | Cereal (General Mills Cheerios Multigrain)                                      | 1000_Grains | 57 | 71 | -14 | 4 | 3   | C |

|          |                                                                             |             |    |    |     |   |     |   |
|----------|-----------------------------------------------------------------------------|-------------|----|----|-----|---|-----|---|
| 57327500 | Cereal (Quaker Oatmeal Squares)                                             | 1000_Grains | 57 | 71 | -14 | 4 | 4   | C |
| 57346500 | Oatmeal Honey Nut Heaven, Quaker (formerly Toasted Oatmeal, Honey Nut)      | 1000_Grains | 57 | 71 | -14 | 4 | 2.5 | D |
| 57215000 | Frosty O's                                                                  | 1000_Grains | 57 | 70 | -13 | 4 | 2.5 | D |
| 53544450 | PowerBar (fortified high energy bar)                                        | 1000_Grains | 57 | 69 | -12 | 4 | 2.5 | D |
| 57304100 | Cereal (Quaker Life)                                                        | 1000_Grains | 57 | 69 | -12 | 4 | 3   | D |
| 57100100 | Cereal, ready-to-eat, NFS                                                   | 1000_Grains | 57 | 67 | -10 | 4 | 2.5 | D |
| 57206710 | Cereal (General Mills Fiber One Honey Clusters)                             | 1000_Grains | 57 | 67 | -10 | 4 | 4   | C |
| 57404100 | Malt-O-Meal Toasty O's                                                      | 1000_Grains | 57 | 67 | -10 | 4 | 3   | D |
| 57413000 | Wheat germ, with sugar and honey                                            | 1000_Grains | 57 | 67 | -10 | 4 | 5   | C |
| 57206800 | Cereal (Healt Valley Fiber 7 Flakes)                                        | 1000_Grains | 57 | 66 | -9  | 4 | 4.5 | C |
| 57231000 | Cereal (Post Grape-Nuts Flakes)                                             | 1000_Grains | 57 | 65 | -8  | 4 | 4   | C |
| 51300110 | Bread, whole wheat                                                          | 1000_Grains | 57 | 63 | -6  | 4 | 4   | B |
| 56203096 | Oatmeal, instant, plain, made with milk, no added fat                       | 1000_Grains | 57 | 63 | -6  | 4 | 4   | B |
| 51122300 | Bread, white, special formula, added fiber                                  | 1000_Grains | 57 | 62 | -5  | 4 | 4.5 | A |
| 51300050 | Bread, whole grain white                                                    | 1000_Grains | 57 | 62 | -5  | 4 | 4.5 | A |
| 51300120 | Bread, whole wheat, toasted                                                 | 1000_Grains | 57 | 62 | -5  | 4 | 4   | B |
| 56202970 | Oatmeal, cooked, quick (1 or 3 minutes), NS as to fat added in cooking      | 1000_Grains | 57 | 62 | -5  | 4 | 3.5 | B |
| 56203020 | Oatmeal, cooked, quick (1 or 3 minutes), fat not added in cooking           | 1000_Grains | 57 | 62 | -5  | 4 | 3.5 | B |
| 56207300 | Whole wheat cereal, wheat and barley, cooked, fat not added in cooking      | 1000_Grains | 57 | 62 | -5  | 4 | 3.5 | B |
| 56207340 | Whole wheat cereal, wheat and barley, cooked, NS as to fat added in cooking | 1000_Grains | 57 | 62 | -5  | 4 | 3.5 | B |
| 51220000 | Roll, whole wheat, 100%                                                     | 1000_Grains | 57 | 61 | -4  | 4 | 4   | C |
| 56208510 | Oat bran cereal, cooked, fat added                                          | 1000_Grains | 57 | 49 | 8   | 1 | 4   | A |
| 56208520 | Oat bran cereal, cooked, NS as to fat                                       | 1000_Grains | 57 | 49 | 8   | 1 | 4   | A |
| 57305500 | Cereal (Malt-O-Meal Honey Nut Toasty O's)                                   | 1000_Grains | 56 | 73 | -17 | 4 | 2.5 | D |
| 57321700 | Optimum, Nature's Path                                                      | 1000_Grains | 56 | 72 | -16 | 4 | 3.5 | D |
| 57206715 | Cereal (General Mills Fiber One Raisin Bran Clusters)                       | 1000_Grains | 56 | 66 | -10 | 4 | 4   | C |
| 56203030 | Oatmeal, cooked, instant, fat not added in cooking                          | 1000_Grains | 56 | 64 | -8  | 4 | 4   | B |
| 56203080 | Oatmeal, cooked, instant, NS as to fat added in cooking                     | 1000_Grains | 56 | 64 | -8  | 4 | 4   | B |
| 56207330 | Whole wheat cereal, wheat and barley, cooked, fat added in cooking          | 1000_Grains | 56 | 64 | -8  | 4 | 3.5 | B |
| 51320550 | Roll, whole wheat, hot dog bun                                              | 1000_Grains | 56 | 62 | -6  | 4 | 4   | B |
| 51320560 | Roll, whole wheat, hamburger bun                                            | 1000_Grains | 56 | 62 | -6  | 4 | 4   | B |
| 51300060 | Bread, whole grain white, toasted                                           | 1000_Grains | 56 | 61 | -5  | 4 | 4.5 | B |
| 51303100 | Muffin, English, whole grain white                                          | 1000_Grains | 56 | 61 | -5  | 4 | 4   | B |
| 57213850 | Cereal (General Mills Cheerios Frosted)                                     | 1000_Grains | 55 | 70 | -15 | 4 | 2.5 | D |
| 57221810 | Cereal (General Mills Cheerios Fruity)                                      | 1000_Grains | 55 | 70 | -15 | 4 | 2.5 | D |
| 57128005 | Cereal (General Mills 25% Less Sugar Cocoa Puffs)                           | 1000_Grains | 55 | 68 | -13 | 4 | 2.5 | D |
| 57332100 | Cereal (General Mills Raisin Nut Bran)                                      | 1000_Grains | 55 | 67 | -12 | 4 | 3   | D |

|          |                                                                            |             |    |    |     |   |     |   |
|----------|----------------------------------------------------------------------------|-------------|----|----|-----|---|-----|---|
| 53720510 | Snickers Marathon Energy bar                                               | 1000_Grains | 55 | 66 | -11 | 4 | 2   | D |
| 53720300 | Nutrition bar (PowerBar)                                                   | 1000_Grains | 55 | 65 | -10 | 4 | 2.5 | D |
| 57214100 | Frosted Wheat Bites                                                        | 1000_Grains | 55 | 64 | -9  | 4 | 4   | B |
| 57301530 | Cereal (Kashi Heart to Heart Honey Toasted Oat)                            | 1000_Grains | 55 | 64 | -9  | 4 | 4.5 | C |
| 57331000 | Cereal (Post Raisin Bran)                                                  | 1000_Grains | 55 | 62 | -7  | 4 | 3   | D |
| 51201150 | Bread, pita, whole wheat, 100%                                             | 1000_Grains | 55 | 60 | -5  | 4 | 4.5 | A |
| 51601020 | Bread, multigrain                                                          | 1000_Grains | 55 | 60 | -5  | 4 | 4.5 | A |
| 52215260 | Tortilla, whole wheat                                                      | 1000_Grains | 55 | 60 | -5  | 4 | 3   | C |
| 57219000 | Cereal, fruit and fiber                                                    | 1000_Grains | 55 | 60 | -5  | 4 | 4   | C |
| 57221000 | Cereal, fiber and fruit                                                    | 1000_Grains | 55 | 60 | -5  | 4 | 4   | C |
| 53540500 | Breakfast bar, date, with yogurt coating                                   | 1000_Grains | 55 | 59 | -4  | 4 | 4.5 | C |
| 56207360 | Wheat cereal, chocolate flavored, cooked, fat not added in cooking         | 1000_Grains | 55 | 59 | -4  | 4 | 3.5 | C |
| 56207370 | Wheat cereal, chocolate flavored, cooked                                   | 1000_Grains | 55 | 59 | -4  | 4 | 3.5 | C |
| 51320040 | Roll, wheat or cracked wheat, made from home recipe or purchased at bakery | 1000_Grains | 55 | 51 | 4   | 1 | 3.5 | D |
| 55702100 | Dosa (Indian), plain                                                       | 1000_Grains | 55 | 51 | 4   | 1 | 3.5 | C |
| 57103100 | Cereal (General Mills Cheerios Apple Cinnamon)                             | 1000_Grains | 54 | 69 | -15 | 4 | 2.5 | D |
| 57237200 | Cereal (Post Honey Bunches of Oats with Vanilla Bunches)                   | 1000_Grains | 54 | 68 | -14 | 4 | 4   | C |
| 53720100 | Nutrition bar (Balance Original Bar)                                       | 1000_Grains | 54 | 66 | -12 | 4 | 2   | D |
| 57319000 | 100% Natural Cereal, plain, Quaker                                         | 1000_Grains | 54 | 64 | -10 | 4 | 4   | C |
| 56203105 | Oatmeal, instant, plain, made with non-dairy milk, NS as to fat            | 1000_Grains | 54 | 62 | -8  | 4 | 3.5 | B |
| 57206000 | Cereal (Familia)                                                           | 1000_Grains | 54 | 61 | -7  | 4 | 4   | B |
| 56203087 | Oatmeal, instant, plain, made with water, fat added                        | 1000_Grains | 54 | 60 | -6  | 4 | 3.5 | B |
| 51201160 | Bread, pita, whole wheat, 100%, toasted                                    | 1000_Grains | 54 | 59 | -5  | 4 | 4   | A |
| 51301600 | Bread, pita, whole wheat                                                   | 1000_Grains | 54 | 59 | -5  | 4 | 4   | B |
| 51301620 | Bread, pita, wheat or cracked wheat                                        | 1000_Grains | 54 | 59 | -5  | 4 | 4   | B |
| 51601010 | Bread, multigrain, toasted                                                 | 1000_Grains | 54 | 59 | -5  | 4 | 4.5 | A |
| 57106260 | Cereal (General Mills Cheerios Berry Burst)                                | 1000_Grains | 53 | 68 | -15 | 4 | 2.5 | D |
| 53720510 | Snickers Marathon Energy bar                                               | 1000_Grains | 53 | 67 | -14 | 4 | 2   | D |
| 57316380 | Cereal (General Mills Cheerios Oat Cluster Crunch)                         | 1000_Grains | 53 | 67 | -14 | 4 | 2.5 | D |
| 56203175 | Oatmeal, instant, other flavors, no added fat                              | 1000_Grains | 53 | 63 | -10 | 4 | 3.5 | C |
| 56203070 | Oatmeal, cooked, instant, fat added in cooking                             | 1000_Grains | 53 | 60 | -7  | 4 | 3.5 | C |
| 57138000 | Total Corn Flakes                                                          | 1000_Grains | 53 | 60 | -7  | 4 | 2.5 | D |
| 51301610 | Bread, pita, whole wheat, toasted                                          | 1000_Grains | 53 | 59 | -6  | 4 | 4   | A |
| 51301630 | Bread, pita, wheat or cracked wheat, toasted                               | 1000_Grains | 53 | 59 | -6  | 4 | 4   | A |
| 53540802 | Kashi TLC Chewy Granola Bar                                                | 1000_Grains | 53 | 58 | -5  | 4 | 3.5 | C |
| 51601210 | Bread, multigrain, with raisins                                            | 1000_Grains | 53 | 57 | -4  | 4 | 4   | B |
| 56103020 | Macaroni, cooked, spinach, fat added in cooking                            | 1000_Grains | 53 | 48 | 5   | 1 | 3.5 | B |
| 55301025 | French toast, gluten free                                                  | 1000_Grains | 53 | 47 | 6   | 3 | 3   | D |

|          |                                                                                |             |    |    |     |   |     |   |
|----------|--------------------------------------------------------------------------------|-------------|----|----|-----|---|-----|---|
| 57232100 | Healthy Choice Almond Crunch with raisins, Kellogg's                           | 1000_Grains | 52 | 70 | -18 | 4 | 3   | D |
| 57404200 | Malt-O-Meal Apple and Cinnamon Toasty O's                                      | 1000_Grains | 52 | 65 | -13 | 4 | 2   | E |
| 53720500 | Nutrition bar (Snickers Marathon Protein Bar)                                  | 1000_Grains | 52 | 64 | -12 | 4 | 2.5 | D |
| 56203130 | Oatmeal, instant, maple flavored, no added fat                                 | 1000_Grains | 52 | 62 | -10 | 4 | 3.5 | C |
| 56203155 | Oatmeal, instant, fruit flavored, no added fat                                 | 1000_Grains | 52 | 61 | -9  | 4 | 3.5 | C |
| 57110000 | Cereal (Kellogg's All-Bran Bran Buds)                                          | 1000_Grains | 52 | 60 | -8  | 4 | 3.5 | D |
| 56203060 | Oatmeal, cooked, quick (1 or 3 minutes), fat added in cooking                  | 1000_Grains | 52 | 58 | -6  | 4 | 3.5 | B |
| 57231100 | Grape-Nuts Trail Mix Crunch                                                    | 1000_Grains | 52 | 58 | -6  | 4 | 4   | C |
| 51601220 | Bread, multigrain, with raisins, toasted                                       | 1000_Grains | 52 | 57 | -5  | 4 | 4   | A |
| 53710802 | Cereal or granola bar (Kashi Crunchy)                                          | 1000_Grains | 52 | 57 | -5  | 4 | 3.5 | C |
| 57137000 | Cereal, corn puffs                                                             | 1000_Grains | 52 | 56 | -4  | 4 | 3.5 | C |
| 56203610 | Oatmeal, multigrain, no added fat                                              | 1000_Grains | 52 | 54 | -2  | 4 | 4   | A |
| 55205000 | Waffle, whole grain                                                            | 1000_Grains | 52 | 52 | 0   | 3 | 2   | E |
| 56114020 | Noodles, cooked, spinach, fat added in cooking                                 | 1000_Grains | 52 | 46 | 6   | 1 | 4   | A |
| 57335550 | Cereal (General Mills Reese's Puffs)                                           | 1000_Grains | 51 | 69 | -18 | 4 | 1.5 | E |
| 53540404 | Kellogg's Nutri-Grain Fruit and Nut Bar                                        | 1000_Grains | 51 | 59 | -8  | 4 | 2.5 | C |
| 57152000 | Crispy Wheats'n Raisins                                                        | 1000_Grains | 51 | 58 | -7  | 4 | 2.5 | D |
| 56203095 | Oatmeal, instant, plain, made with milk, NS as to fat                          | 1000_Grains | 51 | 56 | -5  | 4 | 3.5 | C |
| 56203097 | Oatmeal, instant, plain, made with milk, fat added                             | 1000_Grains | 51 | 56 | -5  | 4 | 3.5 | C |
| 57230000 | Cereal (Post Grape-Nuts)                                                       | 1000_Grains | 51 | 54 | -3  | 4 | 4.5 | C |
| 57316200 | Cereal, nutty nuggets                                                          | 1000_Grains | 51 | 54 | -3  | 4 | 4.5 | C |
| 55105200 | Pancakes, whole grain                                                          | 1000_Grains | 51 | 48 | 3   | 3 | 2   | D |
| 56116990 | Long rice noodles, made from mung beans, cooked                                | 1000_Grains | 51 | 45 | 6   | 1 | 4   | A |
| 56117000 | Long rice noodles (made from mung beans), cooked, fat not added in cooking     | 1000_Grains | 51 | 45 | 6   | 1 | 4   | A |
| 57124100 | Cereal (General Mills Cheerios Chocolate)                                      | 1000_Grains | 50 | 68 | -18 | 4 | 2   | D |
| 53720700 | Nutrition bar (Tiger's Milk)                                                   | 1000_Grains | 50 | 66 | -16 | 4 | 2   | D |
| 41435110 | High protein bar, candy-like, soy and milk base                                | 1000_Grains | 50 | 61 | -11 | 4 | 2   | D |
| 57103000 | Cereal (Post Alpha-Bits)                                                       | 1000_Grains | 50 | 61 | -11 | 4 | 2.5 | D |
| 53720610 | Nutrition bar (South Beach Living High Protein Bar)                            | 1000_Grains | 50 | 60 | -10 | 4 | 2.5 | D |
| 53710504 | Cereal or granola bar (Kellogg's Nutri-Grain Fruit and Nut Bar)                | 1000_Grains | 50 | 59 | -9  | 4 | 2.5 | D |
| 57301511 | Cereal (Kashi GOLEAN Crunch)                                                   | 1000_Grains | 50 | 59 | -9  | 4 | 4.5 | C |
| 57303100 | Cereal (General Mills Kix)                                                     | 1000_Grains | 50 | 56 | -6  | 4 | 3.5 | C |
| 51208100 | Bagel, whole wheat, 100%, with raisins                                         | 1000_Grains | 50 | 53 | -3  | 4 | 3.5 | C |
| 57301510 | Cereal (Kashi GOLEAN)                                                          | 1000_Grains | 50 | 50 | 0   | 4 | 5   | A |
| 56207086 | Wheat, cream of, cooked, regular, made with milk, fat added in cooking         | 1000_Grains | 50 | 45 | 5   | 1 | 3.5 | C |
| 56201700 | Cornstarch with milk, eaten as a cereal (2 tbsp cornstarch in 2-1/2 cups milk) | 1000_Grains | 50 | 44 | 6   | 1 | 3.5 | B |
| 56207087 | Wheat, cream of, cooked, regular, made with milk, fat not added in cooking     | 1000_Grains | 50 | 44 | 6   | 1 | 3.5 | C |

|          |                                                                                        |             |    |    |     |   |     |   |
|----------|----------------------------------------------------------------------------------------|-------------|----|----|-----|---|-----|---|
| 55301015 | French toast, whole grain                                                              | 1000_Grains | 50 | 43 | 7   | 3 | 3   | D |
| 55301020 | French toast, whole grain, reduced fat                                                 | 1000_Grains | 50 | 43 | 7   | 3 | 3.5 | C |
| 55301055 | French toast sticks, whole grain                                                       | 1000_Grains | 50 | 43 | 7   | 3 | 3   | D |
| 56104020 | Macaroni, cooked, vegetable, fat added in cooking                                      | 1000_Grains | 50 | 43 | 7   | 1 | 4   | A |
| 57125000 | Cereal (General Mills Cinnamon Toast Crunch)                                           | 1000_Grains | 49 | 64 | -15 | 4 | 2.5 | D |
| 53540806 | Kashi TLC Crunchy Granola Bar                                                          | 1000_Grains | 49 | 61 | -12 | 4 | 3   | C |
| 57301512 | Cereal (Kashi GOLEAN Crunch Honey Almond Flax)                                         | 1000_Grains | 49 | 61 | -12 | 4 | 4.5 | C |
| 57344025 | Cereal (Kellogg's Special K Cinnamon Pecan)                                            | 1000_Grains | 49 | 59 | -10 | 4 | 3   | D |
| 41435120 | Zone Perfect Classic Crunch nutrition bar                                              | 1000_Grains | 49 | 58 | -9  | 4 | 1.5 | E |
| 57128880 | Complete Oat Bran Flakes, Kellogg's (formerly Common Sense Oat Bran, plain)            | 1000_Grains | 49 | 55 | -6  | 4 | 3   | D |
| 56207212 | Whole wheat cereal, cooked, made with milk                                             | 1000_Grains | 49 | 54 | -5  | 4 | 3.5 | B |
| 51208000 | Bagel, whole wheat, 100%                                                               | 1000_Grains | 49 | 53 | -4  | 4 | 4   | C |
| 51208010 | Bagel, whole wheat, 100%, toasted                                                      | 1000_Grains | 49 | 53 | -4  | 4 | 3.5 | C |
| 51208110 | Bagel, whole wheat, 100%, with raisins, toasted                                        | 1000_Grains | 49 | 53 | -4  | 4 | 3.5 | C |
| 51300100 | Bagel, whole grain white                                                               | 1000_Grains | 49 | 53 | -4  | 4 | 4   | C |
| 56207190 | Whole wheat cereal, cooked, NS as to fat                                               | 1000_Grains | 49 | 53 | -4  | 4 | 3.5 | B |
| 56207210 | Whole wheat cereal, cooked, fat added                                                  | 1000_Grains | 49 | 53 | -4  | 4 | 3.5 | B |
| 56207026 | Cream of wheat, regular or quick, made with non-dairy milk, no added fat               | 1000_Grains | 49 | 46 | 3   | 3 | 3.5 | B |
| 55105205 | Pancakes, whole grain, reduced fat                                                     | 1000_Grains | 49 | 45 | 4   | 3 | 2.5 | D |
| 57124300 | Cereal (General Mills Lucky Charms Chocolate)                                          | 1000_Grains | 48 | 66 | -18 | 4 | 2   | D |
| 53540806 | Kashi TLC Crunchy Granola Bar                                                          | 1000_Grains | 48 | 60 | -12 | 4 | 3   | C |
| 57344007 | Cereal (Kellogg's Special K Low Fat Granola)                                           | 1000_Grains | 48 | 58 | -10 | 4 | 3   | D |
| 53729000 | Nutrition bar or meal replacement bar, NFS                                             | 1000_Grains | 48 | 57 | -9  | 4 | 1.5 | E |
| 53720800 | Nutrition bar (Zone Perfect Classic Crunch)                                            | 1000_Grains | 48 | 56 | -8  | 4 | 1.5 | E |
| 55200060 | Waffle, whole grain, from frozen                                                       | 1000_Grains | 48 | 56 | -8  | 4 | 3.5 | C |
| 55200080 | Waffle, whole grain, fruit, from frozen                                                | 1000_Grains | 48 | 56 | -8  | 4 | 3.5 | C |
| 57227000 | Cereal, granola                                                                        | 1000_Grains | 48 | 56 | -8  | 4 | 4   | C |
| 57309100 | Cereal (Nature Valley Granola)                                                         | 1000_Grains | 48 | 56 | -8  | 4 | 4   | C |
| 56203222 | Oatmeal, cooked, quick (1 or 3 minutes), made with milk, fat added in cooking          | 1000_Grains | 48 | 54 | -6  | 4 | 3.5 | C |
| 56203223 | Oatmeal, cooked, instant, made with milk, fat added in cooking                         | 1000_Grains | 48 | 54 | -6  | 4 | 3.5 | C |
| 56203212 | Oatmeal, cooked, quick (1 or 3 minutes), made with milk, fat not added in cooking      | 1000_Grains | 48 | 52 | -4  | 4 | 3.5 | B |
| 56203232 | Oatmeal, cooked, quick (1 or 3 minutes), made with milk, NS as to fat added in cooking | 1000_Grains | 48 | 52 | -4  | 4 | 3.5 | B |
| 56112030 | Noodles, cooked, fat added in cooking                                                  | 1000_Grains | 48 | 41 | 7   | 1 | 3.5 | B |
| 56207040 | Wheat, cream of, cooked, made with milk                                                | 1000_Grains | 48 | 41 | 7   | 1 | 3.5 | C |
| 57106060 | Cereal (General Mills Cheerios Banana Nut)                                             | 1000_Grains | 47 | 60 | -13 | 4 | 2.5 | D |
| 57307010 | Cereal (Post Maple Pecan Crunch)                                                       | 1000_Grains | 47 | 59 | -12 | 4 | 3.5 | C |
| 57229500 | Cereal (Kellogg's Low Fat Granola with Raisins)                                        | 1000_Grains | 47 | 57 | -10 | 4 | 3   | D |



|          |                                                                                    |             |    |    |     |   |     |   |
|----------|------------------------------------------------------------------------------------|-------------|----|----|-----|---|-----|---|
| 57237300 | Cereal (Post Honey Bunches of Oats with Almonds)                                   | 1000_Grains | 47 | 57 | -10 | 4 | 2.5 | D |
| 57301540 | Cereal (Kashi Honey Sunshine Squares)                                              | 1000_Grains | 47 | 53 | -6  | 4 | 4   | C |
| 57329000 | Cereal, raisin bran                                                                | 1000_Grains | 47 | 53 | -6  | 4 | 3   | D |
| 56203213 | Oatmeal, cooked, instant, made with milk, fat not added in cooking                 | 1000_Grains | 47 | 51 | -4  | 4 | 3.5 | C |
| 56203233 | Oatmeal, cooked, instant, made with milk, NS as to fat added in cooking            | 1000_Grains | 47 | 51 | -4  | 4 | 3.5 | C |
| 51300210 | Bread, whole wheat, with raisins                                                   | 1000_Grains | 47 | 50 | -3  | 4 | 3   | D |
| 56203600 | Oatmeal, multigrain, NS as to fat                                                  | 1000_Grains | 47 | 49 | -2  | 4 | 4   | B |
| 56203620 | Oatmeal, multigrain, fat added                                                     | 1000_Grains | 47 | 49 | -2  | 4 | 4   | B |
| 57130000 | Cereal (General Mills Cookie Crisp)                                                | 1000_Grains | 46 | 60 | -14 | 4 | 2   | D |
| 57201900 | Cereal (General Mills Dora The Explorer)                                           | 1000_Grains | 46 | 57 | -11 | 4 | 3   | D |
| 57229000 | Cereal (Kellogg's Low Fat Granola)                                                 | 1000_Grains | 46 | 56 | -10 | 4 | 4   | C |
| 57320500 | Cereal (Quaker Granola with Oats, Honey, and Raisins)                              | 1000_Grains | 46 | 56 | -10 | 4 | 4   | C |
| 51300180 | Bread, puri, wheat                                                                 | 1000_Grains | 46 | 55 | -9  | 4 | 3.5 | C |
| 55200130 | Waffle, whole grain, from fast food / restaurant                                   | 1000_Grains | 46 | 55 | -9  | 4 | 1.5 | E |
| 55200200 | Waffle, from school, NFS                                                           | 1000_Grains | 46 | 54 | -8  | 4 | 3.5 | C |
| 51300220 | Bread, whole wheat, with raisins, toasted                                          | 1000_Grains | 46 | 50 | -4  | 4 | 2.5 | D |
| 56101030 | Macaroni, cooked, fat added in cooking                                             | 1000_Grains | 46 | 40 | 6   | 1 | 3.5 | B |
| 56131000 | Spaghetti, cooked, fat added in cooking                                            | 1000_Grains | 46 | 40 | 6   | 1 | 3.5 | B |
| 56113990 | Noodles, vegetable, cooked                                                         | 1000_Grains | 46 | 36 | 10  | 1 | 4   | B |
| 57324000 | Peanut Butter Toast Crunch, General Mills                                          | 1000_Grains | 45 | 63 | -18 | 4 | 1.5 | E |
| 57128000 | Cereal (General Mills Cocoa Puffs)                                                 | 1000_Grains | 45 | 62 | -17 | 4 | 2   | E |
| 53541300 | Slim Fast Original Meal Bar                                                        | 1000_Grains | 45 | 57 | -12 | 4 | 2   | D |
| 57327450 | Cereal (Quaker Toasted Oat Bran)                                                   | 1000_Grains | 45 | 56 | -11 | 4 | 4   | C |
| 55200070 | Waffle, whole grain, reduced fat, from frozen                                      | 1000_Grains | 45 | 53 | -8  | 4 | 3.5 | C |
| 51320720 | Roll, whole grain white, hamburger bun                                             | 1000_Grains | 45 | 51 | -6  | 4 | 3   | D |
| 57319500 | Sun Country 100% Natural Granola, with Almonds                                     | 1000_Grains | 45 | 51 | -6  | 4 | 3.5 | D |
| 51320700 | Roll, whole grain white                                                            | 1000_Grains | 45 | 50 | -5  | 4 | 3   | D |
| 51320710 | Roll, whole grain white, hot dog bun                                               | 1000_Grains | 45 | 50 | -5  | 4 | 3   | D |
| 51806010 | Bread, rice                                                                        | 1000_Grains | 45 | 49 | -4  | 4 | 3.5 | C |
| 51806020 | Bread, rice, toasted                                                               | 1000_Grains | 45 | 49 | -4  | 4 | 3   | C |
| 51808000 | Bread, gluten free                                                                 | 1000_Grains | 45 | 49 | -4  | 4 | 3.5 | C |
| 51808010 | Bread, gluten free, toasted                                                        | 1000_Grains | 45 | 49 | -4  | 4 | 3   | C |
| 56207080 | Wheat, cream of, cooked, NS as to regular, quick, or instant, fat added in cooking | 1000_Grains | 45 | 44 | 1   | 3 | 3.5 | B |
| 55202000 | Waffle, wheat, bran, or multigrain                                                 | 1000_Grains | 45 | 41 | 4   | 1 | 2.5 | D |
| 56207180 | Couscous, plain, cooked, fat added in cooking                                      | 1000_Grains | 45 | 40 | 5   | 1 | 3.5 | B |
| 56201072 | Grits, cooked, corn or hominy, with cheese, regular, fat added in cooking          | 1000_Grains | 45 | 39 | 6   | 3 | 3   | C |
| 57107000 | Cereal (General Mills Boo Berry)                                                   | 1000_Grains | 44 | 59 | -15 | 4 | 2.5 | D |
| 57211000 | Cereal (General Mills Frankenberry)                                                | 1000_Grains | 44 | 58 | -14 | 4 | 2.5 | D |

|          |                                                                                       |             |    |    |     |   |     |   |
|----------|---------------------------------------------------------------------------------------|-------------|----|----|-----|---|-----|---|
| 57124050 | Cereal (General Mills Chex Cinnamon)                                                  | 1000_Grains | 44 | 56 | -12 | 4 | 2   | E |
| 57316450 | Cereal (General Mills Oatmeal Crisp with Almonds)                                     | 1000_Grains | 44 | 56 | -12 | 4 | 4   | C |
| 53720600 | Nutrition bar (South Beach Living Meal Bar)                                           | 1000_Grains | 44 | 55 | -11 | 4 | 2   | D |
| 57321905 | Organic Flax Plus, Pumpkin Granola, Nature's Path                                     | 1000_Grains | 44 | 55 | -11 | 4 | 4   | C |
| 57303105 | Cereal (General Mills Honey Kix)                                                      | 1000_Grains | 44 | 54 | -10 | 4 | 3   | D |
| 56207027 | Cream of wheat, regular or quick, made with non-dairy milk, fat added                 | 1000_Grains | 44 | 41 | 3   | 3 | 3.5 | B |
| 56201066 | Grits, regular or quick, made with non-dairy milk, no added fat                       | 1000_Grains | 44 | 40 | 4   | 3 | 3.5 | B |
| 56207025 | Cream of wheat, regular or quick, made with non-dairy milk, NS as to fat              | 1000_Grains | 44 | 40 | 4   | 3 | 3.5 | B |
| 56207220 | Wheat, cream of, cooked, regular, fat added in cooking                                | 1000_Grains | 44 | 40 | 4   | 2 | 3.5 | B |
| 56207022 | Cream of wheat, regular or quick, made with milk, no added fat                        | 1000_Grains | 44 | 39 | 5   | 3 | 3.5 | B |
| 75217500 | Hominy, cooked, fat not added in cooking                                              | 1000_Grains | 44 | 36 | 8   | 3 | 4   | B |
| 57106250 | Cereal (General Mills Kix Berry Berry)                                                | 1000_Grains | 43 | 56 | -13 | 4 | 2.5 | D |
| 53720400 | Nutrition bar (Slim Fast Original Meal Bar)                                           | 1000_Grains | 43 | 55 | -12 | 4 | 2   | D |
| 41435710 | South Beach Living Meal Replacement Bar                                               | 1000_Grains | 43 | 53 | -10 | 4 | 1.5 | E |
| 55100065 | Pancakes, whole grain, from fast food / restaurant                                    | 1000_Grains | 43 | 51 | -8  | 4 | 2   | D |
| 56207021 | Cream of wheat, regular or quick, made with milk, NS as to fat                        | 1000_Grains | 43 | 39 | 4   | 3 | 3.5 | B |
| 56207023 | Cream of wheat, regular or quick, made with milk, fat added                           | 1000_Grains | 43 | 38 | 5   | 3 | 3.5 | B |
| 56201070 | Grits, cooked, corn or hominy, with cheese, regular, NS as to fat added in cooking    | 1000_Grains | 43 | 36 | 7   | 3 | 3   | C |
| 56201071 | Grits, cooked, corn or hominy, with cheese, regular, fat not added in cooking         | 1000_Grains | 43 | 36 | 7   | 3 | 3   | C |
| 56201320 | Grits, cooked, corn or hominy, regular, made with milk, fat added in cooking          | 1000_Grains | 43 | 36 | 7   | 1 | 3.5 | C |
| 56201324 | Grits, cooked, corn or hominy, regular, made with milk, NS as to fat added in cooking | 1000_Grains | 43 | 36 | 7   | 1 | 3.5 | C |
| 56201322 | Grits, cooked, corn or hominy, regular, made with milk, fat not added in cooking      | 1000_Grains | 43 | 35 | 8   | 1 | 3.5 | C |
| 57305165 | Cereal (Malt-O-Meal Cinnamon Toasters)                                                | 1000_Grains | 42 | 60 | -18 | 4 | 2   | D |
| 57419000 | Cereal (General Mills Cheerios Yogurt Burst)                                          | 1000_Grains | 42 | 59 | -17 | 4 | 2.5 | D |
| 57139000 | Cereal (General Mills Count Chocula)                                                  | 1000_Grains | 42 | 58 | -16 | 4 | 2   | D |
| 57305100 | Cereal (General Mills Lucky Charms)                                                   | 1000_Grains | 42 | 58 | -16 | 4 | 2   | E |
| 41435700 | South Beach Living High Protein Cereal Bar                                            | 1000_Grains | 42 | 53 | -11 | 4 | 2.5 | D |
| 57341200 | Cereal (Kellogg's Smart Start Strong)                                                 | 1000_Grains | 42 | 52 | -10 | 4 | 2.5 | D |
| 53540300 | Fiber One Chewy Bar                                                                   | 1000_Grains | 42 | 50 | -8  | 4 | 3.5 | D |
| 53541200 | Meal replacement bar                                                                  | 1000_Grains | 42 | 50 | -8  | 4 | 1.5 | E |
| 56203125 | Oatmeal, instant, maple flavored, NS as to fat                                        | 1000_Grains | 42 | 50 | -8  | 4 | 3.5 | C |
| 56203135 | Oatmeal, instant, maple flavored, fat added                                           | 1000_Grains | 42 | 50 | -8  | 4 | 3.5 | C |
| 56203180 | Oatmeal, instant, other flavors, fat added                                            | 1000_Grains | 42 | 50 | -8  | 4 | 3.5 | C |
| 57321900 | Cereal (Nature's Path Organic Flax Plus)                                              | 1000_Grains | 42 | 50 | -8  | 4 | 4.5 | C |
| 56203150 | Oatmeal, instant, fruit flavored, NS as to fat                                        | 1000_Grains | 42 | 49 | -7  | 4 | 3.5 | C |
| 56203160 | Oatmeal, instant, fruit flavored, fat added                                           | 1000_Grains | 42 | 49 | -7  | 4 | 3.5 | C |

|          |                                                                                                       |             |    |    |     |   |     |   |
|----------|-------------------------------------------------------------------------------------------------------|-------------|----|----|-----|---|-----|---|
| 56203170 | Oatmeal, instant, other flavors, NS as to fat                                                         | 1000_Grains | 42 | 49 | -7  | 4 | 3.5 | C |
| 55100040 | Pancakes, gluten free, from frozen                                                                    | 1000_Grains | 42 | 48 | -6  | 4 | 3.5 | C |
| 55106000 | Pancakes, gluten free                                                                                 | 1000_Grains | 42 | 48 | -6  | 4 | 3.5 | C |
| 57306130 | Cereal (Malt-O-Meal Raisin Bran)                                                                      | 1000_Grains | 42 | 48 | -6  | 4 | 2.5 | D |
| 56207350 | Wheat cereal, chocolate flavored, cooked, made with milk                                              | 1000_Grains | 42 | 45 | -3  | 4 | 3   | C |
| 56201062 | Grits, cooked, corn or hominy, with cheese, NS as to regular, quick, or instant, fat added in cooking | 1000_Grains | 42 | 39 | 3   | 3 | 3   | C |
| 56112000 | Noodles, cooked                                                                                       | 1000_Grains | 42 | 33 | 9   | 1 | 3.5 | B |
| 56112010 | Noodles, cooked, fat not added in cooking                                                             | 1000_Grains | 42 | 33 | 9   | 1 | 3.5 | B |
| 56103000 | Macaroni, cooked, spinach, NS as to fat added in cooking                                              | 1000_Grains | 42 | 32 | 10  | 1 | 4   | A |
| 56103010 | Macaroni, cooked, spinach, fat not added in cooking                                                   | 1000_Grains | 42 | 32 | 10  | 1 | 4   | A |
| 56114000 | Noodles, cooked, spinach, fat not added in cooking                                                    | 1000_Grains | 42 | 32 | 10  | 1 | 4   | B |
| 57237100 | Cereal (Post Honey Bunches of Oats Honey Roasted)                                                     | 1000_Grains | 41 | 53 | -12 | 4 | 2.5 | D |
| 57237900 | Cereal (Post Honey Bunches of Oats Just Bunches)                                                      | 1000_Grains | 41 | 53 | -12 | 4 | 2.5 | D |
| 57344015 | Cereal (Kellogg's Special K Fruit & Yogurt)                                                           | 1000_Grains | 41 | 52 | -11 | 4 | 2.5 | D |
| 57321500 | 100 % Natural Wholegrain Cereal with raisins, lowfat, Quaker                                          | 1000_Grains | 41 | 50 | -9  | 4 | 4   | C |
| 52303010 | Muffin, whole wheat                                                                                   | 1000_Grains | 41 | 49 | -8  | 4 | 2   | D |
| 52406010 | Bread, whole wheat, with nuts                                                                         | 1000_Grains | 41 | 49 | -8  | 4 | 2.5 | D |
| 53544300 | Granola bar, high fiber, coated with non-chocolate yogurt coating                                     | 1000_Grains | 41 | 46 | -5  | 4 | 4   | C |
| 55100030 | Pancakes, whole grain, from frozen                                                                    | 1000_Grains | 41 | 46 | -5  | 4 | 3   | C |
| 55100035 | Pancakes, whole grain, reduced fat, from frozen                                                       | 1000_Grains | 41 | 46 | -5  | 4 | 3   | C |
| 53714300 | Cereal or granola bar, high fiber, coated with non-chocolate yogurt coating                           | 1000_Grains | 41 | 45 | -4  | 4 | 3.5 | D |
| 51300175 | Bread, chappatti or roti, wheat                                                                       | 1000_Grains | 41 | 42 | -1  | 4 | 4   | B |
| 53430000 | Crepe, NS as to filling                                                                               | 1000_Grains | 41 | 36 | 5   | 2 | 3   | C |
| 56201055 | Grits, regular or quick, made with milk, NS as to fat                                                 | 1000_Grains | 41 | 36 | 5   | 3 | 3.5 | C |
| 53430200 | Crepe, fruit filled                                                                                   | 1000_Grains | 41 | 35 | 6   | 2 | 3   | C |
| 55501000 | Chinese pancake                                                                                       | 1000_Grains | 41 | 34 | 7   | 1 | 3.5 | B |
| 57212100 | French Toast Crunch, General Mills                                                                    | 1000_Grains | 40 | 53 | -13 | 4 | 1.5 | E |
| 53542200 | Granola bar, lowfat, NFS                                                                              | 1000_Grains | 40 | 47 | -7  | 4 | 2.5 | D |
| 51123010 | Bread, high protein                                                                                   | 1000_Grains | 40 | 43 | -3  | 4 | 4   | C |
| 51301540 | Bread, French or Vienna, whole wheat                                                                  | 1000_Grains | 40 | 42 | -2  | 4 | 4   | B |
| 56201065 | Grits, regular or quick, made with non-dairy milk, NS as to fat                                       | 1000_Grains | 40 | 36 | 4   | 3 | 3.5 | C |
| 56201067 | Grits, regular or quick, made with non-dairy milk, fat added                                          | 1000_Grains | 40 | 36 | 4   | 3 | 3.5 | C |
| 58117110 | Cornmeal fritter, Puerto Rican style                                                                  | 1000_Grains | 40 | 36 | 4   | 2 | 2   | D |
| 56201020 | Grits, cooked, corn or hominy, regular, fat added in cooking                                          | 1000_Grains | 40 | 35 | 5   | 2 | 3.5 | B |
| 56201057 | Grits, regular or quick, made with milk, fat added                                                    | 1000_Grains | 40 | 35 | 5   | 3 | 3.5 | C |
| 56201056 | Grits, regular or quick, made with milk, no added fat                                                 | 1000_Grains | 40 | 34 | 6   | 3 | 3.5 | C |
| 51301040 | Bread, wheat or cracked wheat, made from home recipe or purchased at bakery                           | 1000_Grains | 40 | 33 | 7   | 1 | 3.5 | C |
| 56205094 | Rice, cream of, cooked, made with milk                                                                | 1000_Grains | 40 | 33 | 7   | 1 | 3.5 | C |

|          |                                                                                                                   |             |    |    |     |   |     |   |
|----------|-------------------------------------------------------------------------------------------------------------------|-------------|----|----|-----|---|-----|---|
| 56205440 | Rice, white, cooked, converted, fat added in cooking                                                              | 1000_Grains | 40 | 33 | 7   | 1 | 3   | C |
| 71930200 | Casabe, cassava bread                                                                                             | 1000_Grains | 40 | 30 | 10  | 1 | 3   | D |
| 56104000 | Pasta, vegetable, cooked                                                                                          | 1000_Grains | 40 | 28 | 12  | 1 | 4   | A |
| 56104010 | Macaroni, cooked, vegetable, fat not added in cooking                                                             | 1000_Grains | 40 | 28 | 12  | 1 | 4   | A |
| 57124030 | Cereal (General Mills Chex Chocolate)                                                                             | 1000_Grains | 39 | 51 | -12 | 4 | 1.5 | E |
| 57237310 | Cereal (Post Honey Bunches of Oats wth Pecan Bunches)                                                             | 1000_Grains | 39 | 51 | -12 | 4 | 2.5 | D |
| 53712210 | Cereal or granola bar, nonfat                                                                                     | 1000_Grains | 39 | 49 | -10 | 4 | 2.5 | D |
| 57103020 | Alpha-bits with marshmallows                                                                                      | 1000_Grains | 39 | 49 | -10 | 4 | 2   | D |
| 57305150 | Cereal, frosted oat cereal with marshmallows                                                                      | 1000_Grains | 39 | 49 | -10 | 4 | 2   | D |
| 53720200 | Nutrition bar (Clif Bar)                                                                                          | 1000_Grains | 39 | 48 | -9  | 4 | 3   | D |
| 53543100 | Granola bar, peanuts, oats, sugar, wheat germ                                                                     | 1000_Grains | 39 | 47 | -8  | 4 | 2   | D |
| 57143000 | Cereal (Kellogg's Cracklin' Oat Bran)                                                                             | 1000_Grains | 39 | 47 | -8  | 4 | 2.5 | D |
| 53710400 | Cereal or granola bar (General Mills Fiber One Chewy Bar)                                                         | 1000_Grains | 39 | 45 | -6  | 4 | 3.5 | D |
| 57132000 | Cereal (General Mills Chex Corn)                                                                                  | 1000_Grains | 39 | 45 | -6  | 4 | 2.5 | D |
| 57111000 | Bran Chex                                                                                                         | 1000_Grains | 39 | 44 | -5  | 4 | 3   | D |
| 57308300 | Multi Bran Chex                                                                                                   | 1000_Grains | 39 | 44 | -5  | 4 | 3   | D |
| 51123020 | Bread, high protein, toasted                                                                                      | 1000_Grains | 39 | 42 | -3  | 4 | 4   | B |
| 51301550 | Bread, French or Vienna, whole wheat, toasted                                                                     | 1000_Grains | 39 | 41 | -2  | 4 | 4   | C |
| 56203540 | Oatmeal, made with milk and sugar, Puerto Rican style                                                             | 1000_Grains | 39 | 37 | 2   | 1 | 3   | C |
| 56201298 | Grits, cooked, corn or hominy, NS as to regular, quick, or instant, made with milk, fat not added in cooking      | 1000_Grains | 39 | 34 | 5   | 3 | 3.5 | C |
| 56201300 | Grits, cooked, corn or hominy, NS as to regular, quick, or instant, made with milk, NS as to fat added in cooking | 1000_Grains | 39 | 34 | 5   | 3 | 3.5 | C |
| 58117210 | Cornmeal stick, Puerto Rican style                                                                                | 1000_Grains | 39 | 34 | 5   | 2 | 2.5 | C |
| 55204000 | Waffle, cornmeal                                                                                                  | 1000_Grains | 39 | 33 | 6   | 2 | 3   | D |
| 51301050 | Bread, wheat or cracked wheat, made from home recipe or purchased at bakery, toasted                              | 1000_Grains | 39 | 32 | 7   | 1 | 3.5 | D |
| 57106100 | Cereal (General Mills Basic 4)                                                                                    | 1000_Grains | 38 | 50 | -12 | 4 | 3   | D |
| 57344020 | Cereal (Kellogg's Special K Vanilla Almond)                                                                       | 1000_Grains | 38 | 49 | -11 | 4 | 2.5 | D |
| 55200090 | Waffle, gluten free, from frozen                                                                                  | 1000_Grains | 38 | 47 | -9  | 4 | 3   | C |
| 55208000 | Waffle, gluten free                                                                                               | 1000_Grains | 38 | 47 | -9  | 4 | 3   | C |
| 57301535 | Cereal (Kashi Heart to Heart Oat Flakes and Blueberry Clusters)                                                   | 1000_Grains | 38 | 46 | -8  | 4 | 4   | C |
| 57124000 | Chex cereal, NFS                                                                                                  | 1000_Grains | 38 | 43 | -5  | 4 | 2.5 | D |
| 57301520 | Cereal (Kashi Good Friends)                                                                                       | 1000_Grains | 38 | 40 | -2  | 4 | 5   | B |
| 55300055 | French toast, whole grain, from fast food / restaurant                                                            | 1000_Grains | 38 | 39 | -1  | 4 | 2.5 | D |
| 55103000 | Pancakes, with fruit                                                                                              | 1000_Grains | 38 | 35 | 3   | 3 | 3   | C |
| 56205410 | Rice, white, cooked with fat, Puerto Rican style                                                                  | 1000_Grains | 38 | 32 | 6   | 1 | 3   | C |
| 56140100 | Pasta, gluten free                                                                                                | 1000_Grains | 38 | 28 | 10  | 1 | 3.5 | B |
| 55400010 | Crepe, NFS                                                                                                        | 1000_Grains | 38 | 27 | 11  | 2 | 3   | C |
| 56200390 | Barley, NS as to fat                                                                                              | 1000_Grains | 38 | 27 | 11  | 1 | 4   | B |
| 56200400 | Barley, no added fat                                                                                              | 1000_Grains | 38 | 27 | 11  | 1 | 4   | B |

|          |                                                                                                                |             |    |    |     |   |     |   |
|----------|----------------------------------------------------------------------------------------------------------------|-------------|----|----|-----|---|-----|---|
| 53710500 | Cereal or granola bar (Kellogg's Nutri-Grain Cereal Bar)                                                       | 1000_Grains | 37 | 50 | -13 | 4 | 2   | D |
| 41435500 | Clif Bar                                                                                                       | 1000_Grains | 37 | 48 | -11 | 4 | 3   | D |
| 53540402 | Kellogg's Nutri-Grain Yogurt Bar                                                                               | 1000_Grains | 37 | 48 | -11 | 4 | 2   | D |
| 57316300 | Cereal (Health Valley Oat Bran Flakes)                                                                         | 1000_Grains | 37 | 47 | -10 | 4 | 3   | C |
| 57244000 | Just Right                                                                                                     | 1000_Grains | 37 | 43 | -6  | 4 | 2.5 | D |
| 51102010 | Bread, white with whole wheat swirl                                                                            | 1000_Grains | 37 | 41 | -4  | 4 | 4   | C |
| 51401060 | Bread, rye, reduced calorie and/or high fiber                                                                  | 1000_Grains | 37 | 36 | 1   | 4 | 5   | A |
| 51501060 | Bread, oat bran, reduced calorie and/or high fiber                                                             | 1000_Grains | 37 | 36 | 1   | 4 | 5   | A |
| 56205002 | Rice, white, cooked, made with oil                                                                             | 1000_Grains | 37 | 30 | 7   | 1 | 3.5 | B |
| 55401000 | Crepe, plain                                                                                                   | 1000_Grains | 37 | 27 | 10  | 2 | 3   | C |
| 53540902 | Nature Valley Chewy Granola Bar with Yogurt Coating                                                            | 1000_Grains | 36 | 48 | -12 | 4 | 2   | D |
| 57316410 | Oatmeal Crisp, Apple Cinnamon (formerly Oatmeal Crisp with Apples)                                             | 1000_Grains | 36 | 48 | -12 | 4 | 2.5 | D |
| 53540804 | Kashi GOLEAN Crunchy Bars                                                                                      | 1000_Grains | 36 | 47 | -11 | 4 | 2   | E |
| 57344001 | Cereal (Kellogg's Special K Blueberry)                                                                         | 1000_Grains | 36 | 45 | -9  | 4 | 3   | D |
| 57336000 | Cereal (General Mills Chex Rice)                                                                               | 1000_Grains | 36 | 43 | -7  | 4 | 2.5 | D |
| 57301100 | Kaboom                                                                                                         | 1000_Grains | 36 | 42 | -6  | 4 | 2   | D |
| 51401070 | Bread, rye, reduced calorie and/or high fiber, toasted                                                         | 1000_Grains | 36 | 35 | 1   | 4 | 5   | A |
| 51501070 | Bread, oat bran, reduced calorie and/or high fiber, toasted                                                    | 1000_Grains | 36 | 35 | 1   | 4 | 5   | A |
| 55103020 | Pancakes, pumpkin                                                                                              | 1000_Grains | 36 | 33 | 3   | 3 | 3   | C |
| 55203700 | Waffle, cinnamon                                                                                               | 1000_Grains | 36 | 33 | 3   | 3 | 2   | D |
| 56201060 | Grits, cooked, corn or hominy, with cheese, NS as to regular, quick, or instant, NS as to fat added in cooking | 1000_Grains | 36 | 30 | 6   | 3 | 3.5 | C |
| 75217490 | Hominy, cooked, NS as to fat added in cooking                                                                  | 1000_Grains | 36 | 28 | 8   | 3 | 3.5 | C |
| 75217520 | Hominy, cooked                                                                                                 | 1000_Grains | 36 | 28 | 8   | 3 | 3.5 | C |
| 53710502 | Cereal or granola bar (Kellogg's Nutri-Grain Yogurt Bar)                                                       | 1000_Grains | 35 | 50 | -15 | 4 | 2   | D |
| 53540400 | Kellogg's Nutri-Grain Cereal Bar                                                                               | 1000_Grains | 35 | 48 | -13 | 4 | 2   | D |
| 53542210 | Granola bar, nonfat                                                                                            | 1000_Grains | 35 | 47 | -12 | 4 | 2.5 | D |
| 57407110 | Cereal (General Mills 25% Less Sugar Trix)                                                                     | 1000_Grains | 35 | 47 | -12 | 4 | 2.5 | D |
| 57316500 | Cereal (General Mills Oatmeal Crisp with Raisins)                                                              | 1000_Grains | 35 | 45 | -10 | 4 | 3.5 | C |
| 57330010 | Cereal (Kellogg's Raisin Bran Crunch)                                                                          | 1000_Grains | 35 | 45 | -10 | 4 | 2.5 | D |
| 53540804 | Kashi GOLEAN Crunchy Bars                                                                                      | 1000_Grains | 35 | 42 | -7  | 4 | 2   | E |
| 53713100 | Cereal or granola bar, peanuts , oats, sugar, wheat germ                                                       | 1000_Grains | 35 | 41 | -6  | 4 | 2   | D |
| 55200120 | Waffle, fruit, from fast food / restaurant                                                                     | 1000_Grains | 35 | 41 | -6  | 4 | 2   | D |
| 53710906 | Cereal or granola bar (General Mills Nature Valley Crunchy Granola Bar)                                        | 1000_Grains | 35 | 40 | -5  | 4 | 2   | D |
| 53712100 | Cereal or Granola bar, NFS                                                                                     | 1000_Grains | 35 | 40 | -5  | 4 | 2   | D |
| 51320530 | Roll, whole wheat, NS as to 100%, made from home recipe or purchased at bakery                                 | 1000_Grains | 35 | 39 | -4  | 4 | 3.5 | D |
| 55212000 | Waffle, whole grain, reduced fat                                                                               | 1000_Grains | 35 | 38 | -3  | 4 | 2   | E |
| 56201061 | Grits, cooked, corn or hominy, with cheese, NS as to regular, quick, or instant, fat not added in cooking      | 1000_Grains | 35 | 29 | 6   | 3 | 3.5 | C |

|          |                                                                                            |             |    |    |     |   |     |   |
|----------|--------------------------------------------------------------------------------------------|-------------|----|----|-----|---|-----|---|
| 56201090 | Grits, with cheese, NS as to fat                                                           | 1000_Grains | 35 | 29 | 6   | 2 | 3.5 | C |
| 56201092 | Grits, with cheese, fat added                                                              | 1000_Grains | 35 | 29 | 6   | 2 | 3.5 | C |
| 53400300 | Blintz, fruit-filled                                                                       | 1000_Grains | 35 | 28 | 7   | 2 | 3   | C |
| 56201091 | Grits, with cheese, no added fat                                                           | 1000_Grains | 35 | 27 | 8   | 2 | 3.5 | C |
| 56201530 | Cornmeal mush, made with milk                                                              | 1000_Grains | 35 | 27 | 8   | 1 | 3.5 | C |
| 56205320 | Rice, white and wild, cooked, fat added                                                    | 1000_Grains | 35 | 27 | 8   | 1 | 3   | C |
| 56205330 | Rice, white and wild, cooked, NS as to fat                                                 | 1000_Grains | 35 | 27 | 8   | 1 | 3   | C |
| 56101000 | Macaroni, cooked, NS as to fat added in cooking                                            | 1000_Grains | 35 | 25 | 10  | 1 | 3.5 | B |
| 56101010 | Macaroni, cooked, fat not added in cooking                                                 | 1000_Grains | 35 | 25 | 10  | 1 | 3.5 | B |
| 56130000 | Pasta, cooked                                                                              | 1000_Grains | 35 | 25 | 10  | 1 | 3.5 | B |
| 56130010 | Spaghetti, cooked, fat not added in cooking                                                | 1000_Grains | 35 | 25 | 10  | 1 | 3.5 | B |
| 56132000 | Spaghetti, cooked, high protein type (assume no fat added)                                 | 1000_Grains | 35 | 25 | 10  | 1 | 3.5 | B |
| 56200410 | Barley, fat added                                                                          | 1000_Grains | 35 | 25 | 10  | 1 | 3.5 | C |
| 57305600 | Cereal (Malt-O-Meal Marshmallow Mateys)                                                    | 1000_Grains | 34 | 49 | -15 | 4 | 1.5 | E |
| 53710902 | Cereal or granola bar, with yogurt coating (General Mills Nature Valley Chewy Granola Bar) | 1000_Grains | 34 | 48 | -14 | 4 | 2   | D |
| 53710900 | Cereal or granola bar (General Mills Nature Valley Chewy Trail Mix)                        | 1000_Grains | 34 | 46 | -12 | 4 | 2   | E |
| 57224000 | Cereal (General Mills Golden Grahams)                                                      | 1000_Grains | 34 | 46 | -12 | 4 | 2   | E |
| 57305400 | Cereal (Malt-O-Meal Honey Graham Squares)                                                  | 1000_Grains | 34 | 46 | -12 | 4 | 2   | E |
| 57221800 | Cereal, fruit whirls                                                                       | 1000_Grains | 34 | 44 | -10 | 4 | 2.5 | D |
| 57240100 | Cereal (General Mills Chex Honey Nut)                                                      | 1000_Grains | 34 | 43 | -9  | 4 | 2   | D |
| 57307600 | Mini-Swirlz Cinnamon Bun Cereal, Kellogg's                                                 | 1000_Grains | 34 | 40 | -6  | 4 | 3   | D |
| 51102020 | Bread, white with whole wheat swirl, toasted                                               | 1000_Grains | 34 | 38 | -4  | 4 | 4   | C |
| 51404010 | Bread, pumpernickel                                                                        | 1000_Grains | 34 | 37 | -3  | 4 | 4   | C |
| 51404550 | Muffin, English, pumpernickel                                                              | 1000_Grains | 34 | 37 | -3  | 4 | 4   | C |
| 51407010 | Bread, black                                                                               | 1000_Grains | 34 | 37 | -3  | 4 | 4   | C |
| 51404020 | Bread, pumpernickel, toasted                                                               | 1000_Grains | 34 | 36 | -2  | 4 | 4   | C |
| 51407020 | Bread, black, toasted                                                                      | 1000_Grains | 34 | 36 | -2  | 4 | 4   | C |
| 51808100 | Roll, gluten free                                                                          | 1000_Grains | 34 | 35 | -1  | 4 | 3.5 | C |
| 53400200 | Blintz, cheese-filled                                                                      | 1000_Grains | 34 | 26 | 8   | 2 | 3   | D |
| 55300010 | French toast, NFS                                                                          | 1000_Grains | 34 | 25 | 9   | 3 | 3   | D |
| 55301000 | French toast, plain                                                                        | 1000_Grains | 34 | 24 | 10  | 3 | 3   | D |
| 56209000 | Cream of rye                                                                               | 1000_Grains | 34 | 22 | 12  | 1 | 3.5 | A |
| 57407100 | Cereal (General Mills Trix)                                                                | 1000_Grains | 33 | 47 | -14 | 4 | 2   | D |
| 57148600 | Harmony cereal, General Mills                                                              | 1000_Grains | 33 | 44 | -11 | 4 | 2   | D |
| 57344010 | Cereal (Kellogg's Special K Red Berries)                                                   | 1000_Grains | 33 | 42 | -9  | 4 | 2.5 | D |
| 56207102 | Cream of wheat, instant, made with non-dairy milk, no added fat                            | 1000_Grains | 33 | 40 | -7  | 4 | 3.5 | C |
| 55200100 | Waffle, plain, from fast food / restaurant                                                 | 1000_Grains | 33 | 39 | -6  | 4 | 2   | E |
| 53540906 | Nature Valley Crunchy Granola Bar                                                          | 1000_Grains | 33 | 38 | -5  | 4 | 2   | D |

|          |                                                                              |             |    |    |     |   |     |   |
|----------|------------------------------------------------------------------------------|-------------|----|----|-----|---|-----|---|
| 56207092 | Wheat, cream of, cooked, quick, made with milk, fat not added in cooking     | 1000_Grains | 33 | 36 | -3  | 4 | 3.5 | C |
| 56207342 | Whole wheat cereal, wheat and barley, cooked, made with milk                 | 1000_Grains | 33 | 36 | -3  | 4 | 4   | A |
| 52202060 | Cornbread, made from home recipe                                             | 1000_Grains | 33 | 26 | 7   | 1 | 3   | D |
| 52206060 | Cornbread muffin, stick, round, made from home recipe                        | 1000_Grains | 33 | 26 | 7   | 1 | 3   | D |
| 56205400 | Rice, cooked, NS as to type, fat added in cooking                            | 1000_Grains | 33 | 25 | 8   | 1 | 3   | C |
| 56201550 | Cornmeal dumpling                                                            | 1000_Grains | 33 | 20 | 13  | 1 | 3.5 | C |
| 57409100 | Cereal (Post Waffle Crisp)                                                   | 1000_Grains | 32 | 45 | -13 | 4 | 2   | E |
| 57124200 | Cereal, chocolate flavored, frosted, puffed corn                             | 1000_Grains | 32 | 42 | -10 | 4 | 1.5 | E |
| 57303200 | Cereal (Kellogg's Krave)                                                     | 1000_Grains | 32 | 39 | -7  | 4 | 2   | E |
| 55100080 | Pancakes, from school, NFS                                                   | 1000_Grains | 32 | 34 | -2  | 4 | 3.5 | C |
| 51300185 | Bread, paratha, wheat                                                        | 1000_Grains | 32 | 32 | 0   | 4 | 3   | C |
| 55100005 | Pancakes, NFS                                                                | 1000_Grains | 32 | 28 | 4   | 3 | 3   | D |
| 55101000 | Pancakes, plain                                                              | 1000_Grains | 32 | 28 | 4   | 3 | 3   | D |
| 56205006 | Rice, white, cooked, made with margarine                                     | 1000_Grains | 32 | 24 | 8   | 1 | 3.5 | C |
| 57245000 | Just Right Fruit and Nut (formerly Just Right with raisins, dates, and nuts) | 1000_Grains | 31 | 41 | -10 | 4 | 2.5 | D |
| 53540900 | Nature Valley Chewy Trail Mix Granola Bar                                    | 1000_Grains | 31 | 39 | -8  | 4 | 1.5 | E |
| 52304200 | Muffin, oat bran with fruit and/or nuts                                      | 1000_Grains | 31 | 37 | -6  | 4 | 3.5 | C |
| 55100055 | Pancakes, with fruit, from fast food / restaurant                            | 1000_Grains | 31 | 36 | -5  | 4 | 3   | D |
| 51122050 | Bread, reduced calorie and/or high fiber, Italian                            | 1000_Grains | 31 | 31 | 0   | 4 | 4.5 | A |
| 56205007 | Rice, white, cooked, fat added, NS as to fat type                            | 1000_Grains | 31 | 22 | 9   | 1 | 3.5 | C |
| 57104000 | Cereal (Kellogg's Apple Jacks)                                               | 1000_Grains | 30 | 48 | -18 | 4 | 2.5 | D |
| 57344005 | Cereal (Kellogg's Special K Chocolatey Delight)                              | 1000_Grains | 30 | 40 | -10 | 4 | 2   | E |
| 57125900 | Cereal (General Mills Honey Nut Clusters)                                    | 1000_Grains | 30 | 39 | -9  | 4 | 2.5 | D |
| 53544400 | Granola bar, with rice cereal                                                | 1000_Grains | 30 | 37 | -7  | 4 | 2   | E |
| 56207230 | Wheat, cream of, cooked, quick, fat added in cooking                         | 1000_Grains | 30 | 34 | -4  | 4 | 3.5 | B |
| 51108100 | Naan, Indian flatbread                                                       | 1000_Grains | 30 | 32 | -2  | 4 | 3.5 | D |
| 55200020 | Waffle, plain, from frozen                                                   | 1000_Grains | 30 | 32 | -2  | 4 | 3   | D |
| 56207050 | Wheat, cream of, cooked, made with milk and sugar, Puerto Rican style        | 1000_Grains | 30 | 24 | 6   | 1 | 3   | C |
| 55101015 | Pancakes, plain, reduced fat                                                 | 1000_Grains | 30 | 23 | 7   | 3 | 3   | D |
| 56207015 | Cream of wheat, regular or quick, made with water, NS as to fat              | 1000_Grains | 30 | 23 | 7   | 3 | 3.5 | B |
| 56207017 | Cream of wheat, regular or quick, made with water, fat added                 | 1000_Grains | 30 | 23 | 7   | 3 | 3.5 | B |
| 56207016 | Cream of wheat, regular or quick, made with water, no added fat              | 1000_Grains | 30 | 22 | 8   | 3 | 3.5 | A |
| 56117110 | Chow fun rice noodles, cooked, fat added in cooking                          | 1000_Grains | 30 | 21 | 9   | 1 | 3.5 | C |
| 56201515 | Cornmeal mush, NS as to fat                                                  | 1000_Grains | 30 | 21 | 9   | 1 | 3.5 | B |
| 56205420 | Rice, white, cooked, regular, fat added in cooking                           | 1000_Grains | 30 | 21 | 9   | 1 | 3   | C |
| 56205430 | Rice, white, cooked, instant, fat added in cooking                           | 1000_Grains | 30 | 21 | 9   | 1 | 3   | C |
| 56201517 | Cornmeal mush, fat added                                                     | 1000_Grains | 30 | 20 | 10  | 1 | 3.5 | B |
| 56204980 | Rice, white, cooked, converted, NS as to fat added in cooking                | 1000_Grains | 30 | 20 | 10  | 1 | 3   | C |

|          |                                                                                 |             |    |    |     |   |     |   |
|----------|---------------------------------------------------------------------------------|-------------|----|----|-----|---|-----|---|
| 56205040 | Rice, white, cooked, converted, fat not added in cooking                        | 1000_Grains | 30 | 20 | 10  | 1 | 3   | C |
| 56201516 | Cornmeal mush, no added fat                                                     | 1000_Grains | 30 | 19 | 11  | 1 | 3.5 | A |
| 56207010 | Wheat, cream of, cooked, regular, fat not added in cooking                      | 1000_Grains | 30 | 19 | 11  | 1 | 3.5 | B |
| 57213000 | Cereal (Kellogg's Froot Loops)                                                  | 1000_Grains | 29 | 46 | -17 | 4 | 2.5 | D |
| 57221650 | Fruit Harvest cereal, Kellogg's                                                 | 1000_Grains | 29 | 44 | -15 | 4 | 2.5 | D |
| 57106530 | Cereal (Post Selects Blueberry Morning)                                         | 1000_Grains | 29 | 40 | -11 | 4 | 2.5 | D |
| 53710904 | Cereal or granola bar (General Mills Nature Valley Sweet and Salty Granola Bar) | 1000_Grains | 29 | 37 | -8  | 4 | 1   | E |
| 53712200 | Cereal or granola bar, lowfat, NFS                                              | 1000_Grains | 29 | 35 | -6  | 4 | 2   | D |
| 57243870 | Jenny O's                                                                       | 1000_Grains | 29 | 32 | -3  | 4 | 4   | B |
| 56201355 | Grits, instant, made with non-dairy milk, no added fat                          | 1000_Grains | 29 | 31 | -2  | 4 | 3.5 | C |
| 55200010 | Waffle, NFS                                                                     | 1000_Grains | 29 | 30 | -1  | 4 | 3   | D |
| 55200040 | Waffle, fruit, from frozen                                                      | 1000_Grains | 29 | 30 | -1  | 4 | 3   | D |
| 55105400 | Pancakes, rye                                                                   | 1000_Grains | 29 | 23 | 6   | 2 | 3   | D |
| 56206990 | Cream of wheat, NS as to regular, quick, or instant, NS as to fat               | 1000_Grains | 29 | 23 | 6   | 3 | 3.5 | B |
| 56207005 | Cream of wheat, NS as to regular, quick, or instant, fat added                  | 1000_Grains | 29 | 23 | 6   | 3 | 3.5 | B |
| 56201051 | Grits, regular or quick, made with water, no added fat                          | 1000_Grains | 29 | 20 | 9   | 3 | 3.5 | A |
| 56205060 | Rice, cooked, with milk                                                         | 1000_Grains | 29 | 19 | 10  | 1 | 3.5 | C |
| 56201010 | Grits, cooked, corn or hominy, regular, fat not added in cooking                | 1000_Grains | 29 | 17 | 12  | 1 | 3.5 | B |
| 56201030 | Grits, cooked, corn or hominy, regular, NS as to fat added in cooking           | 1000_Grains | 29 | 17 | 12  | 1 | 3.5 | B |
| 57124900 | Cereal (Kellogg's Cinnabon)                                                     | 1000_Grains | 28 | 42 | -14 | 4 | 1.5 | E |
| 57341300 | Cereal (Kellogg's Smorz)                                                        | 1000_Grains | 28 | 42 | -14 | 4 | 1.5 | E |
| 57355000 | Cereal (Post Golden Crisp)                                                      | 1000_Grains | 28 | 42 | -14 | 4 | 2   | D |
| 56201082 | Grits, cooked, corn or hominy, with cheese, quick, fat added in cooking         | 1000_Grains | 28 | 28 | 0   | 4 | 3   | C |
| 56201050 | Grits, regular or quick, made with water, NS as to fat                          | 1000_Grains | 28 | 21 | 7   | 3 | 3.5 | B |
| 56201052 | Grits, regular or quick, made with water, fat added                             | 1000_Grains | 28 | 21 | 7   | 3 | 3.5 | B |
| 56207000 | Cream of wheat, NS as to regular, quick, or instant, no added fat               | 1000_Grains | 28 | 21 | 7   | 3 | 3.5 | A |
| 51000250 | Roll, made from home recipe or purchased at a bakery, NS as to major flour      | 1000_Grains | 28 | 18 | 10  | 2 | 3   | D |
| 51151060 | Roll, white, soft, made from home recipe or purchased at a bakery               | 1000_Grains | 28 | 18 | 10  | 2 | 3   | D |
| 56205300 | Rice, white and wild, cooked, no added fat                                      | 1000_Grains | 28 | 16 | 12  | 1 | 3   | C |
| 56207150 | Couscous, plain, cooked, fat not added in cooking                               | 1000_Grains | 28 | 16 | 12  | 1 | 3.5 | B |
| 56207160 | Couscous, plain, cooked                                                         | 1000_Grains | 28 | 16 | 12  | 1 | 3.5 | B |
| 56201600 | Masa harina, cooked                                                             | 1000_Grains | 28 | 15 | 13  | 1 | 3.5 | C |
| 57213010 | Cereal (Kellogg's Froot Loops Marshmallow)                                      | 1000_Grains | 27 | 45 | -18 | 4 | 2   | D |
| 53540904 | Nature Valley Sweet and Salty Nut Granola Bar                                   | 1000_Grains | 27 | 36 | -9  | 4 | 1   | E |
| 53714230 | Cereal or granola bar, oats, nuts, coated with non-chocolate coating            | 1000_Grains | 27 | 35 | -8  | 4 | 1.5 | E |
| 53544230 | Granola bar, oats, nuts, coated with non-chocolate coating                      | 1000_Grains | 27 | 34 | -7  | 4 | 1.5 | E |
| 53542000 | Snack bar, oatmeal                                                              | 1000_Grains | 27 | 33 | -6  | 4 | 2   | D |
| 53542000 | Snack bar, oatmeal                                                              | 1000_Grains | 27 | 32 | -5  | 4 | 2   | D |



|          |                                                                             |             |    |    |     |   |     |   |
|----------|-----------------------------------------------------------------------------|-------------|----|----|-----|---|-----|---|
| 55100050 | Pancakes, plain, from fast food / restaurant                                | 1000_Grains | 27 | 32 | -5  | 4 | 2.5 | D |
| 55200110 | Waffle, chocolate, from fast food / restaurant                              | 1000_Grains | 27 | 31 | -4  | 4 | 1   | E |
| 57131000 | Cereal (Quaker Corn Bran Crunch)                                            | 1000_Grains | 27 | 30 | -3  | 4 | 3   | D |
| 51302520 | Muffin, English, wheat bran, with raisins                                   | 1000_Grains | 27 | 28 | -1  | 4 | 4   | B |
| 51501010 | Bread, oatmeal                                                              | 1000_Grains | 27 | 28 | -1  | 4 | 3.5 | C |
| 51501020 | Bread, oatmeal, toasted                                                     | 1000_Grains | 27 | 28 | -1  | 4 | 3.5 | C |
| 51501040 | Bread, oat bran                                                             | 1000_Grains | 27 | 28 | -1  | 4 | 3.5 | C |
| 51501050 | Bread, oat bran, toasted                                                    | 1000_Grains | 27 | 28 | -1  | 4 | 3.5 | C |
| 51502010 | Roll, oatmeal                                                               | 1000_Grains | 27 | 28 | -1  | 4 | 3.5 | C |
| 51503000 | Muffin, English, oat bran                                                   | 1000_Grains | 27 | 28 | -1  | 4 | 3.5 | C |
| 51303050 | Muffin, English, wheat or cracked wheat, with raisins                       | 1000_Grains | 27 | 27 | 0   | 4 | 4   | C |
| 51303070 | Muffin, English, whole wheat, with raisins                                  | 1000_Grains | 27 | 27 | 0   | 4 | 4   | C |
| 52307120 | Muffin, multigrain, with fruit                                              | 1000_Grains | 27 | 25 | 2   | 4 | 3.5 | C |
| 53430100 | Crepe, chocolate filled                                                     | 1000_Grains | 27 | 20 | 7   | 3 | 3   | C |
| 56200990 | Grits, NS as to regular, quick, or instant, NS as to fat                    | 1000_Grains | 27 | 20 | 7   | 3 | 3.5 | B |
| 56201040 | Grits, NS as to regular, quick, or instant, fat added                       | 1000_Grains | 27 | 20 | 7   | 3 | 3.5 | B |
| 56201000 | Grits, NS as to regular, quick, or instant, no added fat                    | 1000_Grains | 27 | 19 | 8   | 3 | 3.5 | A |
| 53430250 | Crepe suzette                                                               | 1000_Grains | 27 | 16 | 11  | 2 | 2.5 | D |
| 57323000 | Cereal (Quaker Sweet Crunch)                                                | 1000_Grains | 26 | 37 | -11 | 4 | 0.5 | E |
| 53540800 | Kashi GOLEAN Chewy Bars                                                     | 1000_Grains | 26 | 34 | -8  | 4 | 2   | D |
| 56207101 | Cream of wheat, instant, made with non-dairy milk, NS as to fat             | 1000_Grains | 26 | 32 | -6  | 4 | 3   | C |
| 56207103 | Cream of wheat, instant, made with non-dairy milk, fat added                | 1000_Grains | 26 | 32 | -6  | 4 | 3   | C |
| 53720210 | Nutrition bar (Clif Kids Organic Zbar)                                      | 1000_Grains | 26 | 30 | -4  | 4 | 2.5 | D |
| 52306300 | Muffin, cheese                                                              | 1000_Grains | 26 | 29 | -3  | 4 | 2   | D |
| 55203000 | Waffle, fruit                                                               | 1000_Grains | 26 | 28 | -2  | 4 | 2.5 | D |
| 51320010 | Roll, wheat or cracked wheat                                                | 1000_Grains | 26 | 27 | -1  | 4 | 3.5 | C |
| 51320500 | Roll, whole wheat                                                           | 1000_Grains | 26 | 27 | -1  | 4 | 3.5 | C |
| 51320510 | Roll, whole wheat, NS as to 100%, toasted                                   | 1000_Grains | 26 | 26 | 0   | 4 | 3.5 | C |
| 56201081 | Grits, cooked, corn or hominy, with cheese, quick, fat not added in cooking | 1000_Grains | 26 | 25 | 1   | 4 | 3   | C |
| 51301510 | Bread, wheat or cracked wheat, reduced calorie and/or high fiber            | 1000_Grains | 26 | 22 | 4   | 4 | 4.5 | A |
| 51602010 | Bread, multigrain, reduced calorie and/or high fiber                        | 1000_Grains | 26 | 22 | 4   | 4 | 4.5 | A |
| 55301030 | French toast sticks, NFS                                                    | 1000_Grains | 26 | 22 | 4   | 3 | 2.5 | D |
| 56205090 | Rice, cream of, cooked, fat added                                           | 1000_Grains | 26 | 17 | 9   | 1 | 3.5 | B |
| 56205092 | Rice, cream of, cooked, NS as to fat                                        | 1000_Grains | 26 | 17 | 9   | 1 | 3.5 | B |
| 55105100 | Pancakes, cornmeal                                                          | 1000_Grains | 26 | 16 | 10  | 2 | 2.5 | D |
| 57416010 | Cereal, puffed wheat, sweetened                                             | 1000_Grains | 25 | 37 | -12 | 4 | 2   | D |
| 53710800 | Cereal or granola bar (Kashi Chewy)                                         | 1000_Grains | 25 | 34 | -9  | 4 | 2   | D |
| 53540000 | Breakfast bar, NFS                                                          | 1000_Grains | 25 | 34 | -9  | 4 | 2   | E |

|          |                                                                           |             |    |    |     |   |     |   |
|----------|---------------------------------------------------------------------------|-------------|----|----|-----|---|-----|---|
| 53540200 | Breakfast bar, cereal crust with fruit filling, lowfat                    | 1000_Grains | 25 | 34 | -9  | 4 | 2   | D |
| 51184260 | Breadsticks, soft, stuffed with melted cheese                             | 1000_Grains | 25 | 30 | -5  | 4 | 2   | D |
| 51207010 | Bread, sprouted wheat                                                     | 1000_Grains | 25 | 27 | -2  | 4 | 3.5 | C |
| 51207020 | Bread, sprouted wheat, toasted                                            | 1000_Grains | 25 | 27 | -2  | 4 | 3.5 | C |
| 51301010 | Bread, wheat or cracked wheat                                             | 1000_Grains | 25 | 27 | -2  | 4 | 3.5 | C |
| 51801010 | Bread, barley                                                             | 1000_Grains | 25 | 27 | -2  | 4 | 3.5 | C |
| 52401000 | Bread, Boston Brown                                                       | 1000_Grains | 25 | 27 | -2  | 4 | 3.5 | C |
| 55200050 | Waffle, chocolate, from frozen                                            | 1000_Grains | 25 | 27 | -2  | 4 | 3   | D |
| 56201340 | Grits, instant, made with milk, fat added                                 | 1000_Grains | 25 | 27 | -2  | 4 | 3   | C |
| 56201344 | Grits, instant, made with milk, NS as to fat                              | 1000_Grains | 25 | 27 | -2  | 4 | 3   | C |
| 56207094 | Cream of wheat, instant, made with milk, fat added                        | 1000_Grains | 25 | 27 | -2  | 4 | 3.5 | C |
| 51320020 | Roll, wheat or cracked wheat, toasted                                     | 1000_Grains | 25 | 26 | -1  | 4 | 3.5 | C |
| 51320070 | Roll, wheat or cracked wheat, hamburger bun                               | 1000_Grains | 25 | 26 | -1  | 4 | 4   | C |
| 56201342 | Grits, instant, made with milk, no added fat                              | 1000_Grains | 25 | 26 | -1  | 4 | 3.5 | C |
| 51320060 | Roll, wheat or cracked wheat, hot dog bun                                 | 1000_Grains | 25 | 25 | 0   | 4 | 4   | C |
| 51301520 | Bread, wheat or cracked wheat, reduced calorie and/or high fiber, toasted | 1000_Grains | 25 | 21 | 4   | 4 | 4.5 | A |
| 51602020 | Bread, multigrain, reduced calorie and/or high fiber, toasted             | 1000_Grains | 25 | 21 | 4   | 4 | 4.5 | A |
| 55103100 | Pancakes, with chocolate                                                  | 1000_Grains | 25 | 20 | 5   | 3 | 2   | E |
| 55610300 | Dumpling, plain                                                           | 1000_Grains | 25 | 16 | 9   | 2 | 3   | C |
| 56205050 | Rice, cream of, cooked, no added fat                                      | 1000_Grains | 25 | 14 | 11  | 1 | 3.5 | A |
| 57342010 | Smorz, Kellogg's                                                          | 1000_Grains | 24 | 39 | -15 | 4 | 1.5 | E |
| 57120000 | Cereal (Quaker Cap'n Crunch's Peanut Butter Crunch)                       | 1000_Grains | 24 | 38 | -14 | 4 | 1   | E |
| 53540200 | Breakfast bar, cereal crust with fruit filling, lowfat                    | 1000_Grains | 24 | 31 | -7  | 4 | 2   | D |
| 51183990 | Breadsticks, NFS                                                          | 1000_Grains | 24 | 29 | -5  | 4 | 3   | D |
| 51184200 | Breadsticks, soft, NFS                                                    | 1000_Grains | 24 | 29 | -5  | 4 | 3   | D |
| 51184210 | Breadsticks, soft, from fast food / restaurant                            | 1000_Grains | 24 | 29 | -5  | 4 | 3   | D |
| 52303500 | Muffin, wheat                                                             | 1000_Grains | 24 | 29 | -5  | 4 | 2   | D |
| 52304000 | Muffin, whole grain                                                       | 1000_Grains | 24 | 29 | -5  | 4 | 2   | D |
| 53544250 | Granola bar, coated with non-chocolate coating                            | 1000_Grains | 24 | 29 | -5  | 4 | 0.5 | E |
| 53713000 | Cereal or granola bar, reduced sugar, NFS                                 | 1000_Grains | 24 | 29 | -5  | 4 | 2   | D |
| 53714250 | Cereal or granola bar, coated with non-chocolate coating                  | 1000_Grains | 24 | 29 | -5  | 4 | 0.5 | E |
| 51184250 | Breadsticks, soft, topped with melted cheese                              | 1000_Grains | 24 | 28 | -4  | 4 | 2   | D |
| 52304150 | Muffin, oat bran                                                          | 1000_Grains | 24 | 27 | -3  | 4 | 3.5 | C |
| 56207096 | Cream of wheat, instant, made with milk, NS as to fat                     | 1000_Grains | 24 | 27 | -3  | 4 | 3.5 | C |
| 57349020 | Cereal (Kellogg's Frosted Flakes, Reduced Sugar)                          | 1000_Grains | 24 | 27 | -3  | 4 | 3   | D |
| 51301020 | Bread, wheat or cracked wheat, toasted                                    | 1000_Grains | 24 | 26 | -2  | 4 | 4   | C |
| 51801020 | Bread, barley, toasted                                                    | 1000_Grains | 24 | 26 | -2  | 4 | 4   | C |
| 56207095 | Cream of wheat, instant, made with milk, no added fat                     | 1000_Grains | 24 | 26 | -2  | 4 | 3.5 | C |

|          |                                                                                |             |    |    |     |   |     |   |
|----------|--------------------------------------------------------------------------------|-------------|----|----|-----|---|-----|---|
| 57325000 | Cereal (Kellogg's Product 19)                                                  | 1000_Grains | 24 | 26 | -2  | 4 | 2   | D |
| 51303020 | Muffin, English, wheat or cracked wheat, toasted                               | 1000_Grains | 24 | 24 | 0   | 4 | 4   | B |
| 51303040 | Muffin, English, whole wheat, NS as to 100%, toasted                           | 1000_Grains | 24 | 24 | 0   | 4 | 4   | B |
| 52215100 | Tortilla, corn                                                                 | 1000_Grains | 24 | 21 | 3   | 4 | 4.5 | A |
| 57305170 | Cereal (Malt-O-Meal Coco-Roos)                                                 | 1000_Grains | 23 | 39 | -16 | 4 | 1.5 | E |
| 57243000 | Cereal (Kellogg's Honey Smacks)                                                | 1000_Grains | 23 | 37 | -14 | 4 | 2   | D |
| 57306500 | Cereal (Malt-O-Meal Golden Puffs)                                              | 1000_Grains | 23 | 37 | -14 | 4 | 2   | D |
| 53711002 | Cereal or granola bar (Quaker Chewy 90 Calorie Granola Bar)                    | 1000_Grains | 23 | 35 | -12 | 4 | 2   | D |
| 57302100 | Cereal (Quaker King Vitaman)                                                   | 1000_Grains | 23 | 31 | -8  | 4 | 2   | E |
| 57239000 | Honeycomb, strawberry                                                          | 1000_Grains | 23 | 29 | -6  | 4 | 2   | E |
| 51184030 | Bread stick, soft, prepared with garlic and parmesan cheese                    | 1000_Grains | 23 | 28 | -5  | 4 | 3.5 | D |
| 51184230 | Breadsticks, soft, with parmesan cheese, from fast food / restaurant           | 1000_Grains | 23 | 28 | -5  | 4 | 2   | D |
| 53543000 | Granola bar, reduced sugar, NFS                                                | 1000_Grains | 23 | 28 | -5  | 4 | 2   | D |
| 55203500 | Waffle, nut and honey                                                          | 1000_Grains | 23 | 27 | -4  | 4 | 2   | D |
| 56201350 | Grits, instant, made with non-dairy milk, NS as to fat                         | 1000_Grains | 23 | 26 | -3  | 4 | 3   | C |
| 56201360 | Grits, instant, made with non-dairy milk, fat added                            | 1000_Grains | 23 | 26 | -3  | 4 | 3   | C |
| 51301820 | Bagel, wheat, with fruit and nuts                                              | 1000_Grains | 23 | 25 | -2  | 4 | 3.5 | C |
| 56201330 | Grits, cooked, corn or hominy, quick, made with milk, fat added in cooking     | 1000_Grains | 23 | 24 | -1  | 4 | 3.5 | C |
| 56201332 | Grits, cooked, corn or hominy, quick, made with milk, fat not added in cooking | 1000_Grains | 23 | 24 | -1  | 4 | 3.5 | C |
| 51302500 | Muffin, English, wheat bran                                                    | 1000_Grains | 23 | 23 | 0   | 4 | 4   | B |
| 51303010 | Muffin, English, wheat or cracked wheat                                        | 1000_Grains | 23 | 23 | 0   | 4 | 4   | B |
| 51303030 | Muffin, English, whole wheat                                                   | 1000_Grains | 23 | 23 | 0   | 4 | 4   | B |
| 51630200 | Muffin, English, multigrain                                                    | 1000_Grains | 23 | 23 | 0   | 4 | 4   | B |
| 55100060 | Pancakes, with chocolate, from fast food / restaurant                          | 1000_Grains | 23 | 23 | 0   | 4 | 1.5 | E |
| 51122000 | Bread, reduced calorie and/or high fiber, white or NFS                         | 1000_Grains | 23 | 19 | 4   | 4 | 4.5 | A |
| 56205000 | Rice, cooked, NFS                                                              | 1000_Grains | 23 | 11 | 12  | 1 | 3.5 | C |
| 56205001 | Rice, white, cooked, NS as to fat                                              | 1000_Grains | 23 | 11 | 12  | 1 | 3.5 | C |
| 56205008 | Rice, white, cooked, no added fat                                              | 1000_Grains | 23 | 11 | 12  | 1 | 3.5 | C |
| 57322500 | Oreo O's cereal, Post                                                          | 1000_Grains | 22 | 38 | -16 | 4 | 1.5 | E |
| 53541000 | Quaker Chewy Granola Bar                                                       | 1000_Grains | 22 | 36 | -14 | 4 | 2   | E |
| 53541002 | Quaker Chewy 90 Calorie Granola Bar                                            | 1000_Grains | 22 | 34 | -12 | 4 | 2   | D |
| 53542100 | Granola bar, NFS                                                               | 1000_Grains | 22 | 27 | -5  | 4 | 1   | E |
| 56201120 | Grits, cooked, corn or hominy, quick, fat added in cooking                     | 1000_Grains | 22 | 24 | -2  | 4 | 3   | C |
| 55206000 | Waffle, oat bran                                                               | 1000_Grains | 22 | 23 | -1  | 4 | 3   | D |
| 57306100 | Malt-O-Meal Puffed Rice                                                        | 1000_Grains | 22 | 23 | -1  | 4 | 3.5 | B |
| 57340000 | Cereal, puffed rice                                                            | 1000_Grains | 22 | 23 | -1  | 4 | 3.5 | B |
| 51302050 | Bread, wheat bran, with raisins                                                | 1000_Grains | 22 | 22 | 0   | 4 | 3.5 | D |
| 51421000 | Roll, pumpernickel                                                             | 1000_Grains | 22 | 22 | 0   | 4 | 4   | B |

|          |                                                                                      |             |    |    |     |   |     |   |
|----------|--------------------------------------------------------------------------------------|-------------|----|----|-----|---|-----|---|
| 56201240 | Grits, cooked, flavored, corn or hominy, instant, fat not added in cooking           | 1000_Grains | 22 | 22 | 0   | 4 | 3.5 | C |
| 51122010 | Bread, reduced calorie and/or high fiber, white or NFS, toasted                      | 1000_Grains | 22 | 18 | 4   | 4 | 4.5 | B |
| 51000180 | Bread, made from home recipe or purchased at a bakery, NS as to major flour          | 1000_Grains | 22 | 10 | 12  | 1 | 3   | D |
| 51101050 | Bread, white, made from home recipe or purchased at a bakery                         | 1000_Grains | 22 | 10 | 12  | 1 | 3   | D |
| 56204990 | Rice, white, cooked, regular, NS as to fat added in cooking                          | 1000_Grains | 22 | 10 | 12  | 1 | 3   | C |
| 56205010 | Rice, white, cooked, regular, fat not added in cooking                               | 1000_Grains | 22 | 10 | 12  | 1 | 3   | C |
| 56205020 | Rice, white, cooked, instant, NS as to fat added in cooking                          | 1000_Grains | 22 | 10 | 12  | 1 | 3   | C |
| 56205030 | Rice, white, cooked, instant, fat not added in cooking                               | 1000_Grains | 22 | 10 | 12  | 1 | 3   | C |
| 57307150 | Marshmallow Safari, Quaker                                                           | 1000_Grains | 21 | 37 | -16 | 4 | 1.5 | E |
| 57328000 | Cereal (Quaker Quisp)                                                                | 1000_Grains | 21 | 37 | -16 | 4 | 0.5 | E |
| 57126500 | Cocoa Blasts, Quaker                                                                 | 1000_Grains | 21 | 30 | -9  | 4 | 1.5 | E |
| 52405010 | Bread, fruit                                                                         | 1000_Grains | 21 | 28 | -7  | 4 | 2   | D |
| 52304100 | Muffin, oatmeal                                                                      | 1000_Grains | 21 | 25 | -4  | 4 | 2   | D |
| 51121065 | Garlic bread, with melted cheese, from fast food / restaurant                        | 1000_Grains | 21 | 24 | -3  | 4 | 2   | D |
| 55100020 | Pancakes, with fruit, from frozen                                                    | 1000_Grains | 21 | 23 | -2  | 4 | 3   | C |
| 51804010 | Bread, soy                                                                           | 1000_Grains | 21 | 22 | -1  | 4 | 3.5 | C |
| 51805010 | Bread, sunflower meal                                                                | 1000_Grains | 21 | 22 | -1  | 4 | 3.5 | C |
| 55100010 | Pancakes, plain, from frozen                                                         | 1000_Grains | 21 | 22 | -1  | 4 | 3   | C |
| 51301805 | Bagel, whole wheat, with raisins                                                     | 1000_Grains | 21 | 21 | 0   | 4 | 3.5 | C |
| 51302060 | Bread, wheat bran, with raisins, toasted                                             | 1000_Grains | 21 | 21 | 0   | 4 | 3   | C |
| 51421100 | Roll, pumpernickel, toasted                                                          | 1000_Grains | 21 | 21 | 0   | 4 | 4   | B |
| 55301040 | French toast sticks, plain, from fast food / restaurant                              | 1000_Grains | 21 | 21 | 0   | 4 | 2   | D |
| 57134000 | Cereal, corn flakes                                                                  | 1000_Grains | 21 | 21 | 0   | 4 | 2.5 | D |
| 57135000 | Cereal (Kellogg's Corn Flakes)                                                       | 1000_Grains | 21 | 21 | 0   | 4 | 2.5 | D |
| 51301800 | Bagel, wheat, with raisins                                                           | 1000_Grains | 21 | 20 | 1   | 4 | 3.5 | C |
| 51630100 | Bagel, multigrain, with raisins                                                      | 1000_Grains | 21 | 20 | 1   | 4 | 3.5 | C |
| 51630110 | Bagel, multigrain, with raisins, toasted                                             | 1000_Grains | 21 | 20 | 1   | 4 | 3.5 | C |
| 51122100 | Bread, reduced calorie and/or high fiber, white or NFS, with fruit and/or nuts       | 1000_Grains | 21 | 19 | 2   | 4 | 4   | C |
| 51000190 | Bread, made from home recipe or purchased at a bakery, toasted, NS as to major flour | 1000_Grains | 21 | 9  | 12  | 1 | 3   | D |
| 51101060 | Bread, white, made from home recipe or purchased at a bakery, toasted                | 1000_Grains | 21 | 9  | 12  | 1 | 3   | D |
| 56205101 | Congee                                                                               | 1000_Grains | 21 | 8  | 13  | 1 | 3.5 | C |
| 56201510 | Cornmeal mush, made with water                                                       | 1000_Grains | 21 | 7  | 14  | 1 | 3.5 | C |
| 53711000 | Cereal or granola bar (Quaker Chewy Granola Bar)                                     | 1000_Grains | 20 | 33 | -13 | 4 | 1.5 | E |
| 53540700 | Kellogg's Special K bar                                                              | 1000_Grains | 20 | 29 | -9  | 4 | 1.5 | E |
| 52403000 | Bread, nut                                                                           | 1000_Grains | 20 | 26 | -6  | 4 | 2   | D |
| 56202910 | Oatmeal, from fast food, fruit flavored                                              | 1000_Grains | 20 | 25 | -5  | 4 | 3   | C |
| 51108010 | Focaccia, Italian flatbread, plain                                                   | 1000_Grains | 20 | 22 | -2  | 4 | 3   | C |

|          |                                                                                         |             |    |    |     |   |     |   |
|----------|-----------------------------------------------------------------------------------------|-------------|----|----|-----|---|-----|---|
| 51121055 | Garlic bread, with parmesan cheese, from frozen                                         | 1000_Grains | 20 | 22 | -2  | 4 | 2   | D |
| 51121075 | Garlic bread, with melted cheese, from frozen                                           | 1000_Grains | 20 | 22 | -2  | 4 | 2   | D |
| 51184010 | Bread stick, soft                                                                       | 1000_Grains | 20 | 22 | -2  | 4 | 2.5 | D |
| 55201000 | Waffle, plain                                                                           | 1000_Grains | 20 | 22 | -2  | 4 | 2   | D |
| 55207000 | Waffle, multi-bran                                                                      | 1000_Grains | 20 | 22 | -2  | 4 | 3   | D |
| 51804020 | Bread, soy, toasted                                                                     | 1000_Grains | 20 | 21 | -1  | 4 | 4   | D |
| 51805020 | Bread, sunflower meal, toasted                                                          | 1000_Grains | 20 | 21 | -1  | 4 | 3.5 | D |
| 55300050 | French toast, plain, from fast food / restaurant                                        | 1000_Grains | 20 | 20 | 0   | 4 | 2   | D |
| 55301050 | French toast sticks, plain                                                              | 1000_Grains | 20 | 20 | 0   | 4 | 2   | D |
| 57326000 | Cereal (Barbara's Puffins)                                                              | 1000_Grains | 20 | 20 | 0   | 4 | 3.5 | D |
| 51122110 | Bread, reduced calorie and/or high fiber, white or NFS, with fruit and/or nuts, toasted | 1000_Grains | 20 | 18 | 2   | 4 | 4   | C |
| 51502100 | Roll, oat bran                                                                          | 1000_Grains | 20 | 18 | 2   | 4 | 4   | C |
| 52308020 | Matzo ball                                                                              | 1000_Grains | 20 | 15 | 5   | 4 | 3.5 | A |
| 56205080 | Rice, creamed, made with milk and sugar, Puerto Rican style                             | 1000_Grains | 20 | 14 | 6   | 1 | 3.5 | C |
| 56205004 | Rice, white, cooked, made with butter                                                   | 1000_Grains | 20 | 9  | 11  | 1 | 3   | C |
| 57124500 | Cinnamon Grahams, General Mills                                                         | 1000_Grains | 19 | 31 | -12 | 4 | 1.5 | E |
| 57238000 | Cereal (Post Honeycomb)                                                                 | 1000_Grains | 19 | 29 | -10 | 4 | 2   | E |
| 53540000 | Breakfast bar, NFS                                                                      | 1000_Grains | 19 | 25 | -6  | 4 | 1.5 | E |
| 56202905 | Oatmeal, from fast food, maple flavored                                                 | 1000_Grains | 19 | 25 | -6  | 4 | 3.5 | C |
| 56202920 | Oatmeal, from fast food, other flavors                                                  | 1000_Grains | 19 | 25 | -6  | 4 | 3.5 | C |
| 51111010 | Bread, cheese                                                                           | 1000_Grains | 19 | 24 | -5  | 4 | 1.5 | E |
| 51111040 | Bread, cheese, toasted                                                                  | 1000_Grains | 19 | 23 | -4  | 4 | 1.5 | E |
| 53544220 | Granola bar with nuts, chocolate-coated                                                 | 1000_Grains | 19 | 23 | -4  | 4 | 1   | E |
| 51121015 | Garlic bread, NFS                                                                       | 1000_Grains | 19 | 22 | -3  | 4 | 2   | D |
| 56207060 | Cream of wheat, instant, made with water, fat added                                     | 1000_Grains | 19 | 22 | -3  | 4 | 3.5 | C |
| 56207070 | Cream of wheat, instant, made with water, NS as to fat                                  | 1000_Grains | 19 | 22 | -3  | 4 | 3.5 | C |
| 51121025 | Garlic bread, from fast food / restaurant                                               | 1000_Grains | 19 | 21 | -2  | 4 | 2   | D |
| 52208760 | Gordita/sope shell, plain, no filling                                                   | 1000_Grains | 19 | 21 | -2  | 4 | 3   | C |
| 51302010 | Bread, wheat bran                                                                       | 1000_Grains | 19 | 20 | -1  | 4 | 3.5 | C |
| 51301700 | Bagel, wheat                                                                            | 1000_Grains | 19 | 18 | 1   | 4 | 4   | C |
| 51301710 | Bagel, wheat, toasted                                                                   | 1000_Grains | 19 | 18 | 1   | 4 | 3.5 | C |
| 51301750 | Bagel, whole wheat                                                                      | 1000_Grains | 19 | 18 | 1   | 4 | 4   | C |
| 51301760 | Bagel, whole wheat, NS as to 100%, toasted                                              | 1000_Grains | 19 | 18 | 1   | 4 | 3.5 | C |
| 51301900 | Bagel, wheat bran                                                                       | 1000_Grains | 19 | 18 | 1   | 4 | 4   | C |
| 51404500 | Bagel, pumpernickel                                                                     | 1000_Grains | 19 | 18 | 1   | 4 | 4   | C |
| 51501080 | Bagel, oat bran                                                                         | 1000_Grains | 19 | 18 | 1   | 4 | 4   | C |
| 51630000 | Bagel, multigrain                                                                       | 1000_Grains | 19 | 18 | 1   | 4 | 4   | C |
| 55310100 | Fried bread, Puerto Rican style                                                         | 1000_Grains | 19 | 17 | 2   | 2 | 2   | D |

|          |                                                                 |             |    |    |     |   |     |   |
|----------|-----------------------------------------------------------------|-------------|----|----|-----|---|-----|---|
| 56201520 | Cornmeal mush, fried                                            | 1000_Grains | 19 | 6  | 13  | 1 | 3.5 | C |
| 57221700 | Cereal, fruit rings                                             | 1000_Grains | 18 | 27 | -9  | 4 | 1.5 | E |
| 52306500 | Muffin, pumpkin                                                 | 1000_Grains | 18 | 23 | -5  | 4 | 2   | D |
| 52404060 | Bread, pumpkin                                                  | 1000_Grains | 18 | 23 | -5  | 4 | 2   | D |
| 51184220 | Breadsticks, soft, from frozen                                  | 1000_Grains | 18 | 22 | -4  | 4 | 3.5 | D |
| 51184240 | Breadsticks, soft, with parmesan cheese, from frozen            | 1000_Grains | 18 | 22 | -4  | 4 | 3.5 | D |
| 52306700 | Muffin, carrot                                                  | 1000_Grains | 18 | 22 | -4  | 4 | 2   | D |
| 53714220 | Cereal or granola bar with nuts, chocolate coated               | 1000_Grains | 18 | 22 | -4  | 4 | 1   | E |
| 51302020 | Bread, wheat bran, toasted                                      | 1000_Grains | 18 | 19 | -1  | 4 | 3.5 | C |
| 55100025 | Pancakes, with chocolate, from frozen                           | 1000_Grains | 18 | 19 | -1  | 4 | 2.5 | D |
| 51301830 | Bagel, wheat, with fruit and nuts, toasted                      | 1000_Grains | 18 | 18 | 0   | 4 | 3.5 | C |
| 56201540 | Cornmeal, Puerto Rican Style                                    | 1000_Grains | 18 | 13 | 5   | 1 | 3   | C |
| 53711004 | Cereal or granola bar (Quaker Chewy 25% Less Sugar Granola Bar) | 1000_Grains | 17 | 29 | -12 | 4 | 2   | D |
| 57100500 | Character cereals, TV or movie, Kellogg's                       | 1000_Grains | 17 | 26 | -9  | 4 | 1.5 | E |
| 57347000 | Cereal (Kellogg's Corn Pops)                                    | 1000_Grains | 17 | 26 | -9  | 4 | 3   | D |
| 53710700 | Cereal or granola bar (Kellogg's Special K bar)                 | 1000_Grains | 17 | 23 | -6  | 4 | 2   | E |
| 52302600 | Muffin, chocolate                                               | 1000_Grains | 17 | 21 | -4  | 4 | 1.5 | E |
| 51121035 | Garlic bread, from frozen                                       | 1000_Grains | 17 | 20 | -3  | 4 | 2   | D |
| 56207030 | Cream of wheat, instant, made with water, no added fat          | 1000_Grains | 17 | 20 | -3  | 4 | 3.5 | B |
| 57344000 | Cereal (Kellogg's Special K)                                    | 1000_Grains | 17 | 20 | -3  | 4 | 2   | D |
| 51121045 | Garlic bread, with parmesan cheese, from fast food / restaurant | 1000_Grains | 17 | 19 | -2  | 4 | 2   | D |
| 57403100 | Toasties, Post                                                  | 1000_Grains | 17 | 19 | -2  | 4 | 3   | D |
| 56205170 | Yellow rice, cooked, fat added                                  | 1000_Grains | 17 | 18 | -1  | 4 | 3   | C |
| 51620020 | Roll, multigrain, hot dog bun                                   | 1000_Grains | 17 | 16 | 1   | 4 | 3.5 | C |
| 56206970 | Wheat, cream of, cooked, quick, NS as to fat added in cooking   | 1000_Grains | 17 | 16 | 1   | 4 | 3.5 | B |
| 56207020 | Wheat, cream of, cooked, quick, fat not added in cooking        | 1000_Grains | 17 | 16 | 1   | 4 | 3.5 | B |
| 53541004 | Quaker Chewy 25% Less Sugar Granola Bar                         | 1000_Grains | 16 | 28 | -12 | 4 | 2   | D |
| 57126000 | Cereal (Kellogg's Cocoa Krispies)                               | 1000_Grains | 16 | 28 | -12 | 4 | 1.5 | E |
| 53711100 | Cereal or granola bar (Quaker Granola Bites)                    | 1000_Grains | 16 | 23 | -7  | 4 | 1.5 | E |
| 53714200 | Cereal or granola bar, chocolate coated, NFS                    | 1000_Grains | 16 | 22 | -6  | 4 | 1   | E |
| 52306550 | Muffin, zucchini                                                | 1000_Grains | 16 | 20 | -4  | 4 | 2   | D |
| 52407000 | Bread, zucchini                                                 | 1000_Grains | 16 | 20 | -4  | 4 | 2   | D |
| 51121040 | Bread, garlic, toasted                                          | 1000_Grains | 16 | 19 | -3  | 4 | 2   | D |
| 51121010 | Bread, garlic                                                   | 1000_Grains | 16 | 18 | -2  | 4 | 2   | D |
| 55211050 | Waffle, plain, reduced fat                                      | 1000_Grains | 16 | 18 | -2  | 4 | 2   | D |
| 56201220 | Grits, instant, made with water, fat added                      | 1000_Grains | 16 | 17 | -1  | 4 | 3   | C |
| 56201230 | Grits, instant, made with water, NS as to fat                   | 1000_Grains | 16 | 17 | -1  | 4 | 3   | C |
| 55203600 | Waffle, chocolate                                               | 1000_Grains | 16 | 16 | 0   | 4 | 1.5 | E |
| 51000400 | Roll, bran, NS as to type of bran                               | 1000_Grains | 16 | 15 | 1   | 4 | 3.5 | C |

|          |                                                              |             |    |    |     |   |     |   |
|----------|--------------------------------------------------------------|-------------|----|----|-----|---|-----|---|
| 51301120 | Bread, wheat or cracked wheat, with raisins                  | 1000_Grains | 16 | 15 | 1   | 4 | 2.5 | D |
| 51301130 | Bread, wheat or cracked wheat, with raisins, toasted         | 1000_Grains | 16 | 15 | 1   | 4 | 2.5 | D |
| 51620000 | Roll, multigrain                                             | 1000_Grains | 16 | 15 | 1   | 4 | 3.5 | C |
| 51620030 | Roll, multigrain, hamburger bun                              | 1000_Grains | 16 | 15 | 1   | 4 | 3.5 | C |
| 51401010 | Bread, rye                                                   | 1000_Grains | 16 | 13 | 3   | 4 | 4   | C |
| 51401030 | Bread, marble rye and pumpernickel                           | 1000_Grains | 16 | 13 | 3   | 4 | 4   | C |
| 51420000 | Roll, rye                                                    | 1000_Grains | 16 | 13 | 3   | 4 | 4   | C |
| 52104010 | Biscuit, home recipe                                         | 1000_Grains | 16 | 8  | 8   | 1 | 1.5 | E |
| 56205070 | Rice, sweet, cooked with honey                               | 1000_Grains | 16 | 3  | 13  | 1 | 3   | C |
| 57305174 | Cereal (Malt-O-Meal Colossal Crunch)                         | 1000_Grains | 15 | 30 | -15 | 4 | 1   | E |
| 53544410 | Quaker Granola Bites                                         | 1000_Grains | 15 | 22 | -7  | 4 | 1.5 | E |
| 57323050 | Sweet Puffs, Quaker                                          | 1000_Grains | 15 | 22 | -7  | 4 | 2   | D |
| 52304040 | Muffin, bran with fruit, lowfat                              | 1000_Grains | 15 | 16 | -1  | 4 | 3   | D |
| 51129010 | Bread, raisin                                                | 1000_Grains | 15 | 15 | 0   | 4 | 3.5 | D |
| 52209010 | Hush puppy                                                   | 1000_Grains | 15 | 15 | 0   | 4 | 2.5 | D |
| 57148000 | Cereal (Kellogg's Crispix)                                   | 1000_Grains | 15 | 14 | 1   | 4 | 2   | D |
| 51401020 | Bread, rye, toasted                                          | 1000_Grains | 15 | 12 | 3   | 4 | 4   | C |
| 51401040 | Bread, marble rye and pumpernickel, toasted                  | 1000_Grains | 15 | 12 | 3   | 4 | 4   | C |
| 51152000 | Roll, white, soft, reduced calorie and/or high fiber         | 1000_Grains | 15 | 10 | 5   | 4 | 4   | B |
| 56205190 | Rice, white, cooked, glutinous                               | 1000_Grains | 15 | 2  | 13  | 1 | 3.5 | C |
| 57316750 | Oh's, Fruitangy, Quaker                                      | 1000_Grains | 14 | 29 | -15 | 4 | 1.5 | E |
| 57306800 | Cereal (Malt-O-Meal Tootie Fruities)                         | 1000_Grains | 14 | 27 | -13 | 4 | 1.5 | E |
| 51184020 | Bread stick, NS as to hard or soft                           | 1000_Grains | 14 | 16 | -2  | 4 | 2.5 | D |
| 52320110 | Toaster muffin, fruit, toasted                               | 1000_Grains | 14 | 16 | -2  | 4 | 2   | D |
| 52304060 | Muffin, bran with fruit, no fat, no cholesterol              | 1000_Grains | 14 | 15 | -1  | 4 | 4   | C |
| 51129020 | Bread, raisin, toasted                                       | 1000_Grains | 14 | 14 | 0   | 4 | 3.5 | D |
| 57148500 | Cereal, crispy brown rice                                    | 1000_Grains | 14 | 14 | 0   | 4 | 2.5 | D |
| 55100015 | Pancakes, plain, reduced fat, from frozen                    | 1000_Grains | 14 | 13 | 1   | 4 | 3   | D |
| 56201210 | Grits, instant, made with water, no added fat                | 1000_Grains | 14 | 13 | 1   | 4 | 3.5 | B |
| 57151000 | Cereal, crispy rice                                          | 1000_Grains | 14 | 13 | 1   | 4 | 2.5 | D |
| 57305200 | Cereal (Malt-O-Meal Crispy Rice)                             | 1000_Grains | 14 | 13 | 1   | 4 | 2.5 | D |
| 57337000 | Cereal, rice flakes                                          | 1000_Grains | 14 | 13 | 1   | 4 | 2.5 | D |
| 57339000 | Cereal (Kellogg's Rice Krispies)                             | 1000_Grains | 14 | 13 | 1   | 4 | 2.5 | D |
| 51127010 | Bread, potato                                                | 1000_Grains | 14 | 12 | 2   | 4 | 4   | A |
| 51127020 | Bread, potato, toasted                                       | 1000_Grains | 14 | 11 | 3   | 4 | 4   | C |
| 52208750 | Gordita/sope shell, plain, no filling, grilled, no fat added | 1000_Grains | 14 | 11 | 3   | 4 | 4   | B |
| 51207010 | Bread, sprouted wheat                                        | 1000_Grains | 14 | 9  | 5   | 4 | 4   | C |
| 52301000 | Muffin, NFS                                                  | 1000_Grains | 13 | 20 | -7  | 4 | 2   | E |
| 52302010 | Muffin, fruit                                                | 1000_Grains | 13 | 20 | -7  | 4 | 2   | E |

|          |                                                         |             |    |    |     |   |     |   |
|----------|---------------------------------------------------------|-------------|----|----|-----|---|-----|---|
| 52306010 | Muffin, plain                                           | 1000_Grains | 13 | 17 | -4  | 4 | 2   | D |
| 53544200 | Granola bar, chocolate-coated, NFS                      | 1000_Grains | 13 | 17 | -4  | 4 | 0.5 | E |
| 53714210 | Cereal or granola bar, with coconut, chocolate coated   | 1000_Grains | 13 | 17 | -4  | 4 | 0.5 | E |
| 52405100 | Bread, fruit and nut                                    | 1000_Grains | 13 | 16 | -3  | 4 | 2   | D |
| 53544210 | Granola bar, with coconut, chocolate-coated             | 1000_Grains | 13 | 16 | -3  | 4 | 0.5 | E |
| 55301031 | French toast sticks, plain, from frozen                 | 1000_Grains | 13 | 14 | -1  | 4 | 2.5 | D |
| 51000300 | Roll, hard, NS as to major flour                        | 1000_Grains | 13 | 13 | 0   | 4 | 3.5 | C |
| 51153000 | Roll, white, hard                                       | 1000_Grains | 13 | 13 | 0   | 4 | 3.5 | C |
| 51156500 | Roll, garlic                                            | 1000_Grains | 13 | 13 | 0   | 4 | 3.5 | C |
| 51153010 | Roll, white, hard, toasted                              | 1000_Grains | 13 | 12 | 1   | 4 | 3.5 | D |
| 55200030 | Waffle, plain, reduced fat, from frozen                 | 1000_Grains | 13 | 12 | 1   | 4 | 3   | D |
| 51207020 | Bread, sprouted wheat, toasted                          | 1000_Grains | 13 | 9  | 4   | 4 | 4.5 | C |
| 57305175 | Cereal (Malt-O-Meal Cocoa Dyno-Bites)                   | 1000_Grains | 12 | 22 | -10 | 4 | 1.5 | E |
| 57213900 | Frosted Chex                                            | 1000_Grains | 12 | 18 | -6  | 4 | 1.5 | E |
| 57349000 | Cereal (Kellogg's Frosted Flakes)                       | 1000_Grains | 12 | 17 | -5  | 4 | 2   | E |
| 51154600 | Roll, cheese                                            | 1000_Grains | 12 | 14 | -2  | 4 | 3   | D |
| 51155000 | Roll, French or Vienna                                  | 1000_Grains | 12 | 11 | 1   | 4 | 3.5 | C |
| 51119010 | Bread, egg, Challah                                     | 1000_Grains | 12 | 10 | 2   | 4 | 3.5 | C |
| 51119100 | Bread, lowfat, 98% fat free                             | 1000_Grains | 12 | 10 | 2   | 4 | 3.5 | C |
| 51154550 | Roll, egg bread                                         | 1000_Grains | 12 | 10 | 2   | 4 | 3.5 | C |
| 52311010 | Popover                                                 | 1000_Grains | 12 | 7  | 5   | 4 | 3   | D |
| 56117090 | Rice noodles, cooked                                    | 1000_Grains | 12 | 1  | 11  | 1 | 3.5 | C |
| 56117100 | Chow fun rice noodles, cooked, fat not added in cooking | 1000_Grains | 12 | 1  | 11  | 1 | 3.5 | C |
| 57127000 | Cereal (Post Cocoa Pebbles)                             | 1000_Grains | 11 | 24 | -13 | 4 | 1.5 | E |
| 57239100 | Cereal (Kellogg's Honey Crunch Corn Flakes)             | 1000_Grains | 11 | 17 | -6  | 4 | 1.5 | E |
| 52302500 | Muffin, chocolate chip                                  | 1000_Grains | 11 | 16 | -5  | 4 | 1.5 | E |
| 53540500 | Breakfast bar, date, with yogurt coating                | 1000_Grains | 11 | 16 | -5  | 4 | 2   | C |
| 51000100 | Bread, NS as to major flour                             | 1000_Grains | 11 | 12 | -1  | 4 | 3.5 | C |
| 51101000 | Bread, white                                            | 1000_Grains | 11 | 12 | -1  | 4 | 3.5 | C |
| 51158100 | Roll, Mexican, bolillo                                  | 1000_Grains | 11 | 12 | -1  | 4 | 3.5 | D |
| 51133010 | Bread, sour dough                                       | 1000_Grains | 11 | 11 | 0   | 4 | 3.5 | D |
| 51159000 | Roll, sour dough                                        | 1000_Grains | 11 | 11 | 0   | 4 | 3.5 | D |
| 52302610 | Muffin, chocolate, lowfat                               | 1000_Grains | 11 | 10 | 1   | 4 | 2.5 | D |
| 51119040 | Bread, egg, Challah, toasted                            | 1000_Grains | 11 | 9  | 2   | 4 | 3.5 | C |
| 55105300 | Pancakes, sour dough                                    | 1000_Grains | 11 | 9  | 2   | 4 | 3   | C |
| 55300020 | French toast, plain, from frozen                        | 1000_Grains | 11 | 9  | 2   | 4 | 3.5 | C |
| 57117000 | Cereal (Quaker Cap'n Crunch)                            | 1000_Grains | 10 | 24 | -14 | 4 | 1   | E |
| 57117500 | Cereal (Quaker Christmas Crunch)                        | 1000_Grains | 10 | 24 | -14 | 4 | 1   | E |
| 57119000 | Cereal (Quaker Cap'n Crunch's Crunchberries)            | 1000_Grains | 10 | 24 | -14 | 4 | 1   | E |



|          |                                                          |             |    |    |     |   |     |   |
|----------|----------------------------------------------------------|-------------|----|----|-----|---|-----|---|
| 57144000 | Crisp Crunch                                             | 1000_Grains | 10 | 24 | -14 | 4 | 1   | E |
| 51113010 | Bread, cinnamon                                          | 1000_Grains | 10 | 12 | -2  | 4 | 3   | C |
| 51000110 | Bread, NS as to major flour, toasted                     | 1000_Grains | 10 | 11 | -1  | 4 | 3.5 | C |
| 51101010 | Bread, white, toasted                                    | 1000_Grains | 10 | 11 | -1  | 4 | 3.5 | C |
| 51113100 | Bread, cinnamon, toasted                                 | 1000_Grains | 10 | 11 | -1  | 4 | 3.5 | C |
| 51133020 | Bread, sour dough, toasted                               | 1000_Grains | 10 | 10 | 0   | 4 | 3.5 | D |
| 51186120 | Muffin, English, with raisins, toasted                   | 1000_Grains | 10 | 10 | 0   | 4 | 3.5 | C |
| 51000200 | Roll, NS as to major flour                               | 1000_Grains | 10 | 9  | 1   | 4 | 3.5 | D |
| 51000230 | Roll, NS as to major flour, toasted                      | 1000_Grains | 10 | 9  | 1   | 4 | 3.5 | D |
| 51150000 | Roll, white, soft                                        | 1000_Grains | 10 | 9  | 1   | 4 | 3.5 | D |
| 51150100 | Roll, white, soft, toasted                               | 1000_Grains | 10 | 9  | 1   | 4 | 3.5 | D |
| 51154010 | Roll, white, hot dog bun                                 | 1000_Grains | 10 | 9  | 1   | 4 | 3.5 | D |
| 51154100 | Roll, white, hamburger bun                               | 1000_Grains | 10 | 9  | 1   | 4 | 3.5 | D |
| 51157000 | Roll, white, hoagie, submarine                           | 1000_Grains | 10 | 9  | 1   | 4 | 3.5 | D |
| 51186100 | Muffin, English, with raisins                            | 1000_Grains | 10 | 8  | 2   | 4 | 3.5 | C |
| 51186160 | Muffin, English, with fruit other than raisins           | 1000_Grains | 10 | 8  | 2   | 4 | 4   | C |
| 57134090 | Corn flakes, low sodium                                  | 1000_Grains | 10 | 8  | 2   | 4 | 3.5 | B |
| 57305210 | Cereal (Malt-O-Meal Frosted Flakes)                      | 1000_Grains | 9  | 15 | -6  | 4 | 1.5 | E |
| 57348000 | Cereal, frosted corn flakes                              | 1000_Grains | 9  | 15 | -6  | 4 | 1.5 | E |
| 53714400 | Cereal or granola bar, with rice cereal                  | 1000_Grains | 9  | 12 | -3  | 4 | 2   | D |
| 52215350 | Taco shell, flour                                        | 1000_Grains | 9  | 9  | 0   | 4 | 1.5 | E |
| 52215000 | Tortilla, NFS                                            | 1000_Grains | 9  | 6  | 3   | 4 | 3.5 | C |
| 53541006 | Quaker Chewy Dipps Granola Bar                           | 1000_Grains | 8  | 20 | -12 | 4 | 1   | E |
| 57305180 | Cereal (Malt-O-Meal Corn Bursts)                         | 1000_Grains | 8  | 15 | -7  | 4 | 1   | E |
| 52215300 | Taco shell, corn                                         | 1000_Grains | 8  | 7  | 1   | 4 | 2.5 | D |
| 51154510 | Roll, diet                                               | 1000_Grains | 8  | 6  | 2   | 4 | 3.5 | D |
| 52101100 | Biscuit, baking powder or buttermilk type, made from mix | 1000_Grains | 8  | 6  | 2   | 4 | 1.5 | E |
| 52220110 | Arepa Dominicana                                         | 1000_Grains | 8  | 6  | 2   | 4 | 2   | D |
| 51186010 | Muffin, English                                          | 1000_Grains | 8  | 5  | 3   | 4 | 4   | C |
| 51204010 | Bread, wheat germ                                        | 1000_Grains | 8  | 5  | 3   | 4 | 3.5 | C |
| 52101040 | Crumpet                                                  | 1000_Grains | 8  | 5  | 3   | 4 | 4   | C |
| 53711006 | Cereal or granola bar (Quaker Chewy Dipps Granola Bar)   | 1000_Grains | 7  | 22 | -15 | 4 | 1   | E |
| 57216000 | Cereal, frosted rice                                     | 1000_Grains | 7  | 13 | -6  | 4 | 1.5 | E |
| 57218000 | Cereal (Kellogg's Frosted Krispies)                      | 1000_Grains | 7  | 13 | -6  | 4 | 1.5 | D |
| 52206010 | Cornbread muffin, stick, round                           | 1000_Grains | 7  | 7  | 0   | 4 | 3   | D |
| 52304010 | Muffin, wheat bran                                       | 1000_Grains | 7  | 7  | 0   | 4 | 3   | C |
| 56205130 | Yellow rice, cooked, NS as to fat                        | 1000_Grains | 7  | 6  | 1   | 4 | 3   | C |
| 56205150 | Yellow rice, cooked, no added fat                        | 1000_Grains | 7  | 6  | 1   | 4 | 3   | C |
| 51106010 | Bread, native, water, Puerto Rican style                 | 1000_Grains | 7  | 4  | 3   | 4 | 3   | C |

|          |                                                                     |             |   |    |     |   |     |   |
|----------|---------------------------------------------------------------------|-------------|---|----|-----|---|-----|---|
| 51109010 | Bread, Italian, Grecian, Armenian                                   | 1000_Grains | 7 | 4  | 3   | 4 | 3.5 | D |
| 51109150 | Bread, pita with fruit                                              | 1000_Grains | 7 | 4  | 3   | 4 | 3   | D |
| 51186020 | Muffin, English, toasted                                            | 1000_Grains | 7 | 4  | 3   | 4 | 3.5 | C |
| 56201110 | Grits, cooked, corn or hominy, quick, fat not added in cooking      | 1000_Grains | 7 | 4  | 3   | 4 | 3.5 | B |
| 56201130 | Grits, cooked, corn or hominy, quick, NS as to fat added in cooking | 1000_Grains | 7 | 3  | 4   | 4 | 3.5 | B |
| 51140100 | Bread, dough, fried                                                 | 1000_Grains | 6 | 6  | 0   | 4 | 3   | D |
| 51105010 | Bread, Cuban                                                        | 1000_Grains | 6 | 5  | 1   | 4 | 3.5 | D |
| 51107010 | Bread, French or Vienna                                             | 1000_Grains | 6 | 5  | 1   | 4 | 3.5 | D |
| 51110010 | Bread, batter                                                       | 1000_Grains | 6 | 5  | 1   | 4 | 3   | C |
| 52308010 | Matzo, fritters                                                     | 1000_Grains | 6 | 5  | 1   | 4 | 1.5 | D |
| 51155010 | Roll, French or Vienna, toasted                                     | 1000_Grains | 6 | 3  | 3   | 4 | 3.5 | C |
| 57305300 | Cereal (Malt-O-Meal Fruity Dyno-Bites)                              | 1000_Grains | 5 | 15 | -10 | 4 | 1.5 | E |
| 53540600 | Milk 'n Cereal bar                                                  | 1000_Grains | 5 | 12 | -7  | 4 | 0.5 | E |
| 57339500 | Cereal (Kellogg's Rice Krispies Treats Cereal)                      | 1000_Grains | 5 | 7  | -2  | 4 | 1.5 | E |
| 51105040 | Bread, Cuban, toasted                                               | 1000_Grains | 5 | 4  | 1   | 4 | 3.5 | D |
| 51107040 | Bread, French or Vienna, toasted                                    | 1000_Grains | 5 | 4  | 1   | 4 | 3.5 | D |
| 52102040 | Biscuit, from refrigerated dough                                    | 1000_Grains | 5 | 4  | 1   | 4 | 1.5 | E |
| 52215200 | Tortilla, flour                                                     | 1000_Grains | 5 | 4  | 1   | 4 | 2.5 | D |
| 52408000 | Bread, Irish soda                                                   | 1000_Grains | 5 | 3  | 2   | 4 | 2   | E |
| 51109040 | Bread, Italian, Grecian, Armenian, toasted                          | 1000_Grains | 5 | 2  | 3   | 4 | 3   | D |
| 55101010 | Pancakes, reduced calorie, high fiber                               | 1000_Grains | 5 | 2  | 3   | 4 | 3   | C |
| 51180090 | Bagel, with fruit other than raisins, toasted                       | 1000_Grains | 5 | 1  | 4   | 4 | 3.5 | C |
| 52207010 | Corn flour patty or tart, fried                                     | 1000_Grains | 5 | 1  | 4   | 4 | 3   | C |
| 57223000 | Cereal (Post Fruity Pebbles)                                        | 1000_Grains | 4 | 16 | -12 | 4 | 1   | E |
| 53540600 | Milk 'n Cereal bar                                                  | 1000_Grains | 4 | 11 | -7  | 4 | 0.5 | E |
| 57213005 | Froot Loops Cereal Straws                                           | 1000_Grains | 4 | 9  | -5  | 4 | 1.5 | E |
| 51161260 | Roll, sweet, crumb topping, Mexican (Pan Dulce)                     | 1000_Grains | 4 | 6  | -2  | 4 | 2   | D |
| 51109100 | Bread, pita                                                         | 1000_Grains | 4 | 1  | 3   | 4 | 3.5 | C |
| 51134000 | Bread, sweet potato                                                 | 1000_Grains | 4 | 1  | 3   | 4 | 3.5 | C |
| 51135000 | Bread, vegetable                                                    | 1000_Grains | 4 | 1  | 3   | 4 | 3   | D |
| 51180030 | Bagel, with raisins                                                 | 1000_Grains | 4 | 1  | 3   | 4 | 3   | D |
| 51180040 | Bagel, with raisins, toasted                                        | 1000_Grains | 4 | 1  | 3   | 4 | 3.5 | C |
| 52208010 | Corn pone, baked                                                    | 1000_Grains | 4 | 1  | 3   | 4 | 3   | C |
| 52104040 | Biscuit, wheat                                                      | 1000_Grains | 3 | 4  | -1  | 4 | 1   | E |
| 52104100 | Biscuit, cheese                                                     | 1000_Grains | 3 | 4  | -1  | 4 | 1   | E |
| 51109110 | Bread, pita, toasted                                                | 1000_Grains | 3 | 1  | 2   | 4 | 3.5 | C |
| 51121110 | Bread, onion                                                        | 1000_Grains | 3 | 1  | 2   | 4 | 3   | C |
| 51135010 | Bread, vegetable, toasted                                           | 1000_Grains | 3 | 1  | 2   | 4 | 3   | D |
| 51180080 | Bagel, with fruit other than raisins                                | 1000_Grains | 3 | 1  | 2   | 4 | 3.5 | C |

|          |                                                                                 |                 |     |     |     |   |     |   |
|----------|---------------------------------------------------------------------------------|-----------------|-----|-----|-----|---|-----|---|
| 52101150 | Biscuit, baking powder or buttermilk type, made from refrigerated dough, lowfat | 1000_Grains     | 3   | 1   | 2   | 4 | 2   | E |
| 57339100 | Rice Krispies with Real Strawberries, Kellogg's                                 | 1000_Grains     | 2   | 11  | -9  | 4 | 1.5 | E |
| 52302020 | Muffin, fruit, low fat                                                          | 1000_Grains     | 2   | 4   | -2  | 4 | 2.5 | D |
| 52104200 | Biscuit with fruit                                                              | 1000_Grains     | 2   | 3   | -1  | 4 | 1   | E |
| 51180010 | Bagel                                                                           | 1000_Grains     | 2   | 1   | 1   | 4 | 3.5 | C |
| 57316710 | Cereal (Quaker Honey Graham Oh's)                                               | 1000_Grains     | 1   | 12  | -11 | 4 | 0.5 | E |
| 57100400 | Character cereals, TV or movie, General Mills                                   | 1000_Grains     | 1   | 11  | -10 | 4 | 1.5 | E |
| 57201800 | Disney cereals, Kellogg's                                                       | 1000_Grains     | 1   | 11  | -10 | 4 | 1.5 | E |
| 51115010 | Bread, cornmeal and molasses                                                    | 1000_Grains     | 1   | 1   | 0   | 4 | 3   | D |
| 51115020 | Bread, cornmeal and molasses, toasted                                           | 1000_Grains     | 1   | 1   | 0   | 4 | 3   | D |
| 51126010 | Bread, milk and honey                                                           | 1000_Grains     | 1   | 1   | 0   | 4 | 3   | C |
| 51126020 | Bread, milk and honey, toasted                                                  | 1000_Grains     | 1   | 1   | 0   | 4 | 3.5 | C |
| 51180020 | Bagel, toasted                                                                  | 1000_Grains     | 1   | 1   | 0   | 4 | 3.5 | C |
| 52101000 | Biscuit, NFS                                                                    | 1000_Grains     | 1   | 1   | 0   | 4 | 1   | E |
| 52101030 | Biscuit dough, fried                                                            | 1000_Grains     | 1   | 1   | 0   | 4 | 1.5 | E |
| 52103000 | Biscuit, from fast food / restaurant                                            | 1000_Grains     | 1   | 1   | 0   | 4 | 1   | E |
| 52105100 | Scone                                                                           | 1000_Grains     | 1   | 1   | 0   | 4 | 1.5 | E |
| 52105200 | Scone, with fruit                                                               | 1000_Grains     | 1   | 1   | 0   | 4 | 1.5 | E |
| 52201000 | Cornbread, prepared from mix                                                    | 1000_Grains     | 1   | 1   | 0   | 4 | 2   | D |
| 52208020 | Corn pone, fried                                                                | 1000_Grains     | 1   | 1   | 0   | 4 | 3   | C |
| 52302100 | Muffin, fruit, fat free, cholesterol free                                       | 1000_Grains     | 1   | 1   | 0   | 4 | 3   | D |
| 55211000 | Waffle, plain, fat free                                                         | 1000_Grains     | 1   | 1   | 0   | 4 | 3   | D |
| 75132100 | Celery juice                                                                    | 10000_Beverages | 100 | 100 | 0   | 1 | 4   | B |
| 78101125 | Fruit and vegetable smoothie, no dairy                                          | 10000_Beverages | 98  | 100 | -2  | 1 | 5   | D |
| 78101130 | Vegetable smoothie                                                              | 10000_Beverages | 97  | 98  | -1  | 1 | 4.5 | C |
| 75132000 | Mixed vegetable juice                                                           | 10000_Beverages | 95  | 100 | -5  | 1 | 3   | B |
| 78101100 | Fruit and vegetable smoothie, with dairy                                        | 10000_Beverages | 95  | 99  | -4  | 1 | 5   | C |
| 78101118 | Fruit and vegetable smoothie, non-dairy, added protein                          | 10000_Beverages | 92  | 95  | -3  | 2 | 5   | C |
| 78101115 | Fruit and vegetable smoothie, non-dairy                                         | 10000_Beverages | 91  | 96  | -5  | 1 | 5   | C |
| 64134015 | Fruit smoothie, with whole fruit, no dairy                                      | 10000_Beverages | 90  | 93  | -3  | 1 | 5   | D |
| 92201010 | Coffee substitute                                                               | 10000_Beverages | 90  | 85  | 5   | 1 | 4   | B |
| 74301150 | Tomato juice, 100%, low sodium                                                  | 10000_Beverages | 89  | 97  | -8  | 1 | 4   | B |
| 74303100 | Tomato and vegetable juice, 100%, low sodium                                    | 10000_Beverages | 89  | 97  | -8  | 1 | 4   | B |
| 78101110 | Fruit and vegetable smoothie, added protein                                     | 10000_Beverages | 89  | 91  | -2  | 2 | 5   | B |
| 64134100 | Fruit smoothie, light                                                           | 10000_Beverages | 87  | 86  | 1   | 1 | 4.5 | C |
| 92203000 | Cereal beverage                                                                 | 10000_Beverages | 87  | 82  | 5   | 1 | 4   | B |
| 64134030 | Fruit smoothie juice drink, no dairy                                            | 10000_Beverages | 84  | 86  | -2  | 1 | 5   | D |
| 73105010 | Carrot juice, 100%                                                              | 10000_Beverages | 82  | 86  | -4  | 1 | 4   | B |

|          |                                                                                                          |                 |    |    |     |   |     |   |
|----------|----------------------------------------------------------------------------------------------------------|-----------------|----|----|-----|---|-----|---|
| 61210820 | Orange juice, 100%, with calcium added, frozen, reconstituted                                            | 10000_Beverages | 81 | 92 | -11 | 1 | 3   | D |
| 64104610 | Blueberry juice                                                                                          | 10000_Beverages | 81 | 91 | -10 | 1 | 2   | C |
| 73105000 | Beet juice                                                                                               | 10000_Beverages | 81 | 85 | -4  | 1 | 2.5 | C |
| 64104600 | Blackberry juice, 100%                                                                                   | 10000_Beverages | 80 | 96 | -16 | 1 | 3   | D |
| 64132500 | Strawberry juice, 100%                                                                                   | 10000_Beverages | 79 | 95 | -16 | 1 | 3   | D |
| 74301100 | Tomato juice, 100%                                                                                       | 10000_Beverages | 77 | 90 | -13 | 3 | 4   | B |
| 64133100 | Watermelon juice, 100%                                                                                   | 10000_Beverages | 77 | 87 | -10 | 1 | 4   | C |
| 61210250 | Orange juice, 100%, with calcium added, canned, bottled or in a carton                                   | 10000_Beverages | 77 | 85 | -8  | 1 | 3   | D |
| 61219000 | Orange and banana juice                                                                                  | 10000_Beverages | 77 | 83 | -6  | 1 | 1   | E |
| 61213900 | Fruit juice blend, citrus, 100% juice, with calcium added                                                | 10000_Beverages | 76 | 85 | -9  | 1 | 3   | C |
| 95120010 | Nutritional drink or shake, high protein, ready-to-drink, NFS                                            | 10000_Beverages | 74 | 87 | -13 | 4 | 5   | B |
| 74304000 | Tomato juice with clam or beef juice                                                                     | 10000_Beverages | 74 | 86 | -12 | 3 | 4   | C |
| 61210620 | Orange juice, 100%, frozen, reconstituted                                                                | 10000_Beverages | 74 | 83 | -9  | 1 | 3   | C |
| 11553110 | Fruit smoothie, with whole fruit and dairy                                                               | 10000_Beverages | 74 | 72 | 2   | 1 | 4.5 | D |
| 61210720 | Orange juice, 100%, frozen, not reconstituted                                                            | 10000_Beverages | 73 | 83 | -10 | 1 | 1   | E |
| 74302000 | Tomato juice cocktail                                                                                    | 10000_Beverages | 73 | 83 | -10 | 3 | 4   | B |
| 74303000 | Tomato and vegetable juice, 100%                                                                         | 10000_Beverages | 73 | 83 | -10 | 3 | 4   | B |
| 61210000 | Orange juice, 100%, NFS                                                                                  | 10000_Beverages | 73 | 81 | -8  | 1 | 3   | D |
| 64132020 | Prune juice, unsweetened                                                                                 | 10000_Beverages | 73 | 76 | -3  | 1 | 0.5 | E |
| 64134025 | Fruit smoothie, with whole fruit, non-dairy                                                              | 10000_Beverages | 73 | 75 | -2  | 3 | 4.5 | C |
| 95102010 | Carnation Instant Breakfast, nutritional drink, sugar free, ready-to-drink                               | 10000_Beverages | 72 | 83 | -11 | 4 | 5   | B |
| 64134020 | Fruit smoothie, with whole fruit, no dairy, added protein                                                | 10000_Beverages | 72 | 82 | -10 | 4 | 5   | C |
| 61210010 | Orange juice, 100%, freshly squeezed                                                                     | 10000_Beverages | 72 | 80 | -8  | 1 | 3   | D |
| 11553120 | Fruit smoothie, with whole fruit and dairy, added protein                                                | 10000_Beverages | 72 | 71 | 1   | 2 | 5   | C |
| 11553100 | Fruit smoothie, NFS                                                                                      | 10000_Beverages | 72 | 69 | 3   | 1 | 4.5 | C |
| 95106010 | Nutritional drink or shake, ready-to-drink, light (Muscle Milk)                                          | 10000_Beverages | 71 | 84 | -13 | 4 | 5   | B |
| 61219100 | Pineapple-orange-banana juice                                                                            | 10000_Beverages | 71 | 78 | -7  | 1 | 1   | D |
| 92102501 | Coffee, Iced Latte, nonfat                                                                               | 10000_Beverages | 71 | 67 | 4   | 1 | 4.5 | B |
| 92161001 | Coffee, Cappuccino, nonfat                                                                               | 10000_Beverages | 71 | 67 | 4   | 1 | 4.5 | B |
| 92162001 | Coffee, Cappuccino, decaffeinated, nonfat                                                                | 10000_Beverages | 71 | 67 | 4   | 1 | 4.5 | B |
| 95110020 | Nutritional drink or shake, high protein, ready-to-drink (Slim Fast)                                     | 10000_Beverages | 70 | 88 | -18 | 4 | 5   | B |
| 61201020 | Grapefruit juice, 100%, NS as to form                                                                    | 10000_Beverages | 70 | 81 | -11 | 1 | 3   | D |
| 61201220 | Grapefruit juice, 100%, canned, bottled or in a carton                                                   | 10000_Beverages | 70 | 81 | -11 | 1 | 3   | D |
| 61225000 | Pineapple-orange juice, NFS                                                                              | 10000_Beverages | 70 | 78 | -8  | 1 | 1.5 | D |
| 61225200 | Pineapple-orange juice, canned, NS as to sweetened or unsweetened; sweetened, NS as to type of sweetener | 10000_Beverages | 70 | 78 | -8  | 1 | 1.5 | D |
| 61225220 | Pineapple-orange juice, canned, bottled or in a carton                                                   | 10000_Beverages | 70 | 78 | -8  | 1 | 1.5 | D |
| 61210220 | Orange juice, 100%, canned, bottled or in a carton                                                       | 10000_Beverages | 70 | 77 | -7  | 1 | 3   | D |
| 61225600 | Pineapple-orange juice, frozen (reconstituted with water)                                                | 10000_Beverages | 70 | 77 | -7  | 1 | 1   | D |

|          |                                                                               |                 |    |    |     |   |     |   |
|----------|-------------------------------------------------------------------------------|-----------------|----|----|-----|---|-----|---|
| 64121000 | Passion fruit juice, 100%                                                     | 10000_Beverages | 70 | 77 | -7  | 1 | 2   | E |
| 11613000 | Instant breakfast, powder, sweetened with low calorie sweetener, milk added   | 10000_Beverages | 70 | 70 | 0   | 2 | 4   | C |
| 95110010 | Nutritional drink or shake, ready-to-drink, sugar free (Slim Fast)            | 10000_Beverages | 69 | 83 | -14 | 4 | 4.5 | B |
| 61201225 | Grapefruit juice, 100%, with calcium added                                    | 10000_Beverages | 69 | 80 | -11 | 1 | 3   | D |
| 64124060 | Pineapple juice, unsweetened, with added Vitamin C                            | 10000_Beverages | 69 | 74 | -5  | 1 | 0.5 | E |
| 92610010 | Horchata beverage, made with almonds or other nuts and seeds                  | 10000_Beverages | 69 | 74 | -5  | 1 | 0.5 | E |
| 64132010 | Prune juice, 100%                                                             | 10000_Beverages | 69 | 71 | -2  | 1 | 1   | E |
| 92101911 | Coffee, Latte, decaffeinated, nonfat                                          | 10000_Beverages | 69 | 64 | 5   | 1 | 4.5 | B |
| 61213220 | Tangerine juice, 100%                                                         | 10000_Beverages | 68 | 76 | -8  | 1 | 3   | D |
| 61213620 | Tangerine juice, frozen (reconstituted with water)                            | 10000_Beverages | 68 | 76 | -8  | 1 | 1.5 | D |
| 61216220 | Grapefruit and orange juice, canned                                           | 10000_Beverages | 68 | 76 | -8  | 1 | 1.5 | E |
| 61222000 | Pineapple-grapefruit juice, NFS                                               | 10000_Beverages | 68 | 76 | -8  | 1 | 1.5 | D |
| 64124010 | Pineapple juice, NS as to sweetened or unsweetened                            | 10000_Beverages | 68 | 74 | -6  | 1 | 0.5 | E |
| 64124200 | Pineapple-apple-guava juice, with added vitamin C                             | 10000_Beverages | 68 | 74 | -6  | 1 | 1   | D |
| 92101901 | Coffee, Latte, nonfat                                                         | 10000_Beverages | 68 | 64 | 4   | 1 | 4.5 | B |
| 64125000 | Pineapple juice-non-citrus juice blend, unsweetened, with added vitamin C     | 10000_Beverages | 67 | 71 | -4  | 1 | 0.5 | E |
| 11552200 | Orange Julius                                                                 | 10000_Beverages | 67 | 67 | 0   | 1 | 0.5 | D |
| 92102502 | Coffee, Iced Latte, with non-dairy milk                                       | 10000_Beverages | 66 | 78 | -12 | 3 | 4   | C |
| 61201000 | Grapefruit juice, NFS                                                         | 10000_Beverages | 66 | 75 | -9  | 1 | 2   | D |
| 61201010 | Grapefruit juice, 100%, freshly squeezed                                      | 10000_Beverages | 66 | 75 | -9  | 1 | 3   | D |
| 61216010 | Grapefruit and orange juice, fresh                                            | 10000_Beverages | 66 | 74 | -8  | 1 | 2   | C |
| 61219150 | Orange-white grape-peach juice                                                | 10000_Beverages | 66 | 73 | -7  | 1 | 1.5 | E |
| 95104000 | Nutritional drink or shake, ready-to-drink, sugar free (Glucerna)             | 10000_Beverages | 65 | 76 | -11 | 4 | 4   | B |
| 61201620 | Grapefruit juice, 100%, frozen, reconstituted                                 | 10000_Beverages | 65 | 73 | -8  | 1 | 3   | D |
| 64105400 | Cranberry juice, 100%, not a blend                                            | 10000_Beverages | 65 | 73 | -8  | 1 | 2.5 | E |
| 64104150 | Apple-cherry juice                                                            | 10000_Beverages | 65 | 71 | -6  | 1 | 1   | D |
| 61213800 | Fruit juice blend, citrus, 100% juice                                         | 10000_Beverages | 65 | 70 | -5  | 1 | 2.5 | E |
| 95106000 | Nutritional drink or shake, ready-to-drink (Muscle Milk)                      | 10000_Beverages | 64 | 77 | -13 | 4 | 5   | B |
| 41436000 | Nutritional supplement for people with diabetes, liquid                       | 10000_Beverages | 64 | 70 | -6  | 4 | 4   | B |
| 92161002 | Coffee, Cappuccino, with non-dairy milk                                       | 10000_Beverages | 63 | 75 | -12 | 3 | 4   | C |
| 61226000 | Strawberry-banana-orange juice                                                | 10000_Beverages | 63 | 71 | -8  | 1 | 2.5 | E |
| 64124020 | Pineapple juice, 100%                                                         | 10000_Beverages | 63 | 68 | -5  | 1 | 2.5 | E |
| 64134000 | Fruit smoothie drink, made with fruit or fruit juice only (no dairy products) | 10000_Beverages | 63 | 67 | -4  | 2 | 0.5 | D |
| 95110000 | Nutritional drink or shake, ready-to-drink (Slim Fast)                        | 10000_Beverages | 62 | 79 | -17 | 4 | 4.5 | B |
| 92101903 | Coffee, Latte, with non-dairy milk                                            | 10000_Beverages | 62 | 74 | -12 | 3 | 4   | C |
| 64104030 | Apple juice, 100%, with calcium added                                         | 10000_Beverages | 61 | 67 | -6  | 1 | 2.5 | D |
| 92101810 | Coffee, macchiato                                                             | 10000_Beverages | 61 | 57 | 4   | 1 | 4   | C |

|          |                                                                          |                 |    |    |     |   |     |   |
|----------|--------------------------------------------------------------------------|-----------------|----|----|-----|---|-----|---|
| 95105000 | Nutritional drink or shake, ready-to-drink (Kellogg's Special K Protein) | 10000_Beverages | 60 | 78 | -18 | 4 | 4.5 | B |
| 64116020 | Grape juice, 100%                                                        | 10000_Beverages | 60 | 63 | -3  | 1 | 1.5 | E |
| 64116050 | Grape juice, NS as to sweetened or unsweetened, with added vitamin C     | 10000_Beverages | 60 | 63 | -3  | 1 | 0.5 | E |
| 64116060 | Grape juice, 100%, with calcium added                                    | 10000_Beverages | 60 | 63 | -3  | 1 | 1.5 | E |
| 64116100 | Grape juice, unsweetened, with added vitamin C                           | 10000_Beverages | 60 | 63 | -3  | 1 | 0.5 | E |
| 92102500 | Coffee, Iced Latte                                                       | 10000_Beverages | 60 | 56 | 4   | 1 | 4.5 | B |
| 92161000 | Coffee, Cappuccino                                                       | 10000_Beverages | 60 | 56 | 4   | 1 | 4.5 | B |
| 92162000 | Coffee, Cappuccino, decaffeinated                                        | 10000_Beverages | 60 | 56 | 4   | 1 | 4.5 | B |
| 78101120 | Fruit and vegetable smoothie, bottled                                    | 10000_Beverages | 59 | 75 | -16 | 4 | 3.5 | D |
| 92552100 | Orange-cranberry juice drink, low calorie, with vitamin C added          | 10000_Beverages | 59 | 68 | -9  | 4 | 2.5 | B |
| 64104010 | Apple juice, 100%                                                        | 10000_Beverages | 59 | 65 | -6  | 1 | 2.5 | D |
| 64100220 | Cranberry juice blend, 100% juice, with calcium added                    | 10000_Beverages | 58 | 63 | -5  | 1 | 2.5 | D |
| 64100100 | Fruit juice, NFS                                                         | 10000_Beverages | 58 | 62 | -4  | 1 | 1   | E |
| 92101610 | Coffee, espresso                                                         | 10000_Beverages | 58 | 53 | 5   | 1 | 4   | B |
| 92101630 | Coffee, espresso, decaffeinated                                          | 10000_Beverages | 58 | 53 | 5   | 1 | 4   | B |
| 92101900 | Coffee, Latte                                                            | 10000_Beverages | 58 | 53 | 5   | 1 | 4.5 | B |
| 92101910 | Coffee, Latte, decaffeinated                                             | 10000_Beverages | 58 | 53 | 5   | 1 | 4.5 | B |
| 95120050 | Nutritional drink or shake, liquid, soy-based                            | 10000_Beverages | 56 | 66 | -10 | 4 | 4.5 | E |
| 64104090 | Apple juice with added vitamin C and calcium                             | 10000_Beverages | 56 | 61 | -5  | 1 | 1   | E |
| 64104200 | Apple-pear juice                                                         | 10000_Beverages | 56 | 61 | -5  | 1 | 1   | D |
| 64100110 | Fruit juice blend, 100% juice                                            | 10000_Beverages | 56 | 60 | -4  | 1 | 2.5 | E |
| 64126000 | Pomegranate juice, 100%                                                  | 10000_Beverages | 56 | 60 | -4  | 1 | 2   | E |
| 92306090 | Tea, hibiscus                                                            | 10000_Beverages | 56 | 51 | 5   | 1 | 1   | D |
| 64101010 | Apple cider                                                              | 10000_Beverages | 55 | 60 | -5  | 1 | 1.5 | D |
| 64104050 | Apple juice, with added vitamin C                                        | 10000_Beverages | 55 | 60 | -5  | 1 | 1   | D |
| 64100200 | Cranberry juice blend, 100% juice                                        | 10000_Beverages | 55 | 58 | -3  | 1 | 2.5 | E |
| 64116010 | Grape juice, NFS                                                         | 10000_Beverages | 55 | 58 | -3  | 1 | 0.5 | E |
| 61210230 | Orange juice, canned, bottled or in a carton, with sugar                 | 10000_Beverages | 54 | 65 | -11 | 3 | 1   | E |
| 92101906 | Coffee, Latte, with non-dairy milk, flavored                             | 10000_Beverages | 54 | 64 | -10 | 3 | 3.5 | D |
| 64104450 | Apple-raspberry juice                                                    | 10000_Beverages | 54 | 60 | -6  | 1 | 1.5 | D |
| 64105500 | Cranberry-white grape juice mixture, unsweetened                         | 10000_Beverages | 54 | 56 | -2  | 1 | 0.5 | E |
| 61213000 | Tangerine juice, NFS                                                     | 10000_Beverages | 53 | 62 | -9  | 3 | 1   | E |
| 95120020 | Nutritional drink or shake, high protein, light, ready-to-drink, NFS     | 10000_Beverages | 53 | 62 | -9  | 4 | 4.5 | E |
| 11561000 | Cafe con leche                                                           | 10000_Beverages | 53 | 49 | 4   | 1 | 4.5 | B |
| 64104500 | Apple-grape juice                                                        | 10000_Beverages | 52 | 56 | -4  | 1 | 0.5 | E |
| 92101918 | Coffee, Latte, decaffeinated, nonfat, flavored                           | 10000_Beverages | 52 | 52 | 0   | 1 | 4   | C |
| 95101000 | Nutritional drink or shake, ready-to-drink (Boost)                       | 10000_Beverages | 51 | 65 | -14 | 4 | 4   | E |
| 41440020 | Ensure with fiber, liquid                                                | 10000_Beverages | 51 | 63 | -12 | 4 | 4.5 | C |

|          |                                                                                      |                 |    |    |     |   |     |   |
|----------|--------------------------------------------------------------------------------------|-----------------|----|----|-----|---|-----|---|
| 92102505 | Coffee, Iced Latte, with non-dairy milk, flavored                                    | 10000_Beverages | 51 | 62 | -11 | 3 | 3.5 | C |
| 64120010 | Papaya juice, 100%                                                                   | 10000_Beverages | 51 | 52 | -1  | 1 | 1.5 | E |
| 11611000 | Instant breakfast, fluid, canned                                                     | 10000_Beverages | 51 | 51 | 0   | 3 | 3   | E |
| 11612000 | Instant breakfast, powder, milk added                                                | 10000_Beverages | 51 | 51 | 0   | 3 | 3   | E |
| 11551050 | Licudo or Batido                                                                     | 10000_Beverages | 51 | 50 | 1   | 1 | 3.5 | E |
| 92520810 | Grape drink, low calorie                                                             | 10000_Beverages | 50 | 57 | -7  | 4 | 2.5 | B |
| 92550210 | Cranberry-apple juice drink, low calorie, with vitamin C added                       | 10000_Beverages | 50 | 57 | -7  | 4 | 2.5 | B |
| 92101905 | Coffee, Latte, nonfat, flavored                                                      | 10000_Beverages | 50 | 49 | 1   | 1 | 4   | C |
| 64134200 | Fruit smoothie, bottled                                                              | 10000_Beverages | 49 | 63 | -14 | 4 | 3.5 | E |
| 95101010 | Nutritional drink or shake, ready-to-drink (Boost Plus)                              | 10000_Beverages | 49 | 62 | -13 | 4 | 4.5 | E |
| 92520410 | Fruit drink, low calorie                                                             | 10000_Beverages | 49 | 56 | -7  | 4 | 2.5 | B |
| 92801000 | Wine, nonalcoholic                                                                   | 10000_Beverages | 49 | 53 | -4  | 4 | 3   | B |
| 92802000 | Wine, light, nonalcoholic                                                            | 10000_Beverages | 49 | 53 | -4  | 4 | 3   | B |
| 92432000 | Fruit juice drink, citrus, carbonated                                                | 10000_Beverages | 47 | 64 | -17 | 4 | 2   | D |
| 92550350 | Orange juice beverage, 40-50% juice, light                                           | 10000_Beverages | 47 | 64 | -17 | 4 | 2.5 | B |
| 11553130 | Fruit smoothie juice drink, with dairy                                               | 10000_Beverages | 47 | 51 | -4  | 4 | 3   | E |
| 41440010 | Ensure liquid nutrition                                                              | 10000_Beverages | 46 | 56 | -10 | 4 | 4   | D |
| 92101850 | Coffee, cafe con leche                                                               | 10000_Beverages | 46 | 43 | 3   | 1 | 4.5 | C |
| 92550300 | Grapefruit juice drink, low calorie, with vitamin C added                            | 10000_Beverages | 45 | 52 | -7  | 4 | 2.5 | B |
| 92101851 | Coffee, cafe con leche, decaffeinated                                                | 10000_Beverages | 45 | 43 | 2   | 1 | 4.5 | C |
| 41430200 | Meal replacement or supplement, soy- and milk-base, powder, reconstituted with water | 10000_Beverages | 44 | 51 | -7  | 4 | 4.5 | C |
| 92101917 | Coffee, Latte, decaffeinated, flavored                                               | 10000_Beverages | 44 | 41 | 3   | 1 | 4   | C |
| 92101904 | Coffee, Latte, flavored                                                              | 10000_Beverages | 42 | 39 | 3   | 1 | 4   | C |
| 95120000 | Nutritional drink or shake, ready-to-drink, NFS                                      | 10000_Beverages | 41 | 48 | -7  | 4 | 3.5 | E |
| 78101000 | Vegetable and fruit juice, 100% juice, with high vitamin C                           | 10000_Beverages | 41 | 40 | 1   | 1 | 2.5 | E |
| 92102503 | Coffee, Iced Latte, flavored                                                         | 10000_Beverages | 41 | 40 | 1   | 1 | 4   | C |
| 41440100 | Meal replacement or supplement, liquid, soy-based                                    | 10000_Beverages | 40 | 48 | -8  | 4 | 4.5 | B |
| 92551700 | Juice drink, low calorie                                                             | 10000_Beverages | 40 | 47 | -7  | 4 | 2   | B |
| 92510650 | Tamarind drink                                                                       | 10000_Beverages | 40 | 42 | -2  | 1 | 0.5 | E |
| 92162005 | Cappuccino, decaffeinated, sweetened                                                 | 10000_Beverages | 40 | 37 | 3   | 2 | 4   | C |
| 42403010 | Coconut water, unsweetened                                                           | 10000_Beverages | 40 | 31 | 9   | 1 | 2   | C |
| 92101820 | Coffee, macchiato, sweetened                                                         | 10000_Beverages | 39 | 40 | -1  | 1 | 3.5 | D |
| 92431000 | Carbonated juice drink, NS as to type of juice                                       | 10000_Beverages | 38 | 51 | -13 | 4 | 2   | C |
| 92101955 | Coffee, Cafe Mocha, nonfat                                                           | 10000_Beverages | 38 | 39 | -1  | 2 | 3.5 | D |
| 92101970 | Coffee, Cafe Mocha, decaffeinated, nonfat                                            | 10000_Beverages | 38 | 39 | -1  | 2 | 3.5 | D |
| 95103000 | Nutritional drink or shake, ready-to-drink (Ensure)                                  | 10000_Beverages | 37 | 48 | -11 | 4 | 3.5 | E |
| 11623000 | Meal supplement or replacement, commercially prepared, ready-to-drink                | 10000_Beverages | 37 | 47 | -10 | 4 | 3.5 | E |
| 92511250 | Fruit juice beverage, 40-50% juice, citrus                                           | 10000_Beverages | 37 | 46 | -9  | 4 | 0.5 | E |

|          |                                                                                                                  |                 |    |    |     |   |     |   |
|----------|------------------------------------------------------------------------------------------------------------------|-----------------|----|----|-----|---|-----|---|
| 92510720 | Fruit punch, made with fruit juice and soda                                                                      | 10000_Beverages | 36 | 42 | -6  | 2 | 0.5 | E |
| 11553000 | Fruit smoothie drink, made with fruit or fruit juice and dairy products                                          | 10000_Beverages | 36 | 39 | -3  | 3 | 0.5 | E |
| 92161005 | Cappuccino, sweetened                                                                                            | 10000_Beverages | 36 | 32 | 4   | 2 | 4   | C |
| 95342000 | Fruit juice, acai blend                                                                                          | 10000_Beverages | 35 | 50 | -15 | 4 | 0.5 | E |
| 92101960 | Coffee, Cafe Mocha, with non-dairy milk                                                                          | 10000_Beverages | 35 | 49 | -14 | 4 | 3.5 | E |
| 92433000 | Fruit juice drink, noncitrus, carbonated                                                                         | 10000_Beverages | 35 | 46 | -11 | 4 | 1.5 | D |
| 92550380 | Pomegranate juice beverage, 40-50% juice, light                                                                  | 10000_Beverages | 35 | 43 | -8  | 4 | 0.5 | E |
| 92511290 | Papaya juice drink                                                                                               | 10000_Beverages | 35 | 42 | -7  | 4 | 0.5 | E |
| 92306800 | Tea, hot, chai, with milk                                                                                        | 10000_Beverages | 35 | 37 | -2  | 1 | 0.5 | D |
| 64122030 | Peach juice, with sugar                                                                                          | 10000_Beverages | 34 | 48 | -14 | 3 | 0.5 | E |
| 64116030 | Grape juice, with sugar                                                                                          | 10000_Beverages | 33 | 46 | -13 | 3 | 0.5 | E |
| 92101975 | Coffee, Cafe Mocha, decaffeinated, with non-dairy milk                                                           | 10000_Beverages | 33 | 46 | -13 | 4 | 3.5 | E |
| 11641000 | Meal supplement or replacement, milk-based, high protein, liquid                                                 | 10000_Beverages | 33 | 42 | -9  | 4 | 3.5 | E |
| 11641020 | Meal replacement or supplement, milk based, ready-to-drink                                                       | 10000_Beverages | 33 | 42 | -9  | 4 | 3.5 | E |
| 92550200 | Grape juice drink, light                                                                                         | 10000_Beverages | 32 | 42 | -10 | 4 | 2   | B |
| 92101950 | Coffee, Cafe Mocha                                                                                               | 10000_Beverages | 32 | 31 | 1   | 2 | 3.5 | D |
| 92101965 | Coffee, Cafe Mocha, decaffeinated                                                                                | 10000_Beverages | 32 | 31 | 1   | 2 | 3.5 | D |
| 92610110 | Coconut beverage, Puerto Rican                                                                                   | 10000_Beverages | 32 | 31 | 1   | 1 | 0.5 | E |
| 95103010 | Nutritional drink or shake, ready-to-drink (Ensure Plus)                                                         | 10000_Beverages | 31 | 40 | -9  | 4 | 4   | E |
| 92550050 | Apple-white grape juice drink, low calorie, with vitamin C added                                                 | 10000_Beverages | 31 | 39 | -8  | 4 | 2   | B |
| 95102000 | Nutritional drink or shake, ready-to-drink (Carnation Instant Breakfast)                                         | 10000_Beverages | 31 | 39 | -8  | 4 | 3   | E |
| 92307510 | Iced Tea / Lemonade juice drink, light                                                                           | 10000_Beverages | 30 | 50 | -20 | 4 | 2.5 | B |
| 92610030 | Horchata beverage, made with milk                                                                                | 10000_Beverages | 30 | 27 | 3   | 1 | 2.5 | E |
| 28400000 | Gelatin drink, powder, unflavored, unsweetened, reconstituted                                                    | 10000_Beverages | 30 | 19 | 11  | 2 | 3   | B |
| 28401200 | Gelatin drink, powder, flavored, with low-calorie sweetener, reconstituted                                       | 10000_Beverages | 30 | 19 | 11  | 2 | 3   | B |
| 92102602 | Coffee, Iced Cafe Mocha, with non-dairy milk                                                                     | 10000_Beverages | 29 | 43 | -14 | 4 | 3.5 | D |
| 92511280 | Orange-grape-banana juice drink                                                                                  | 10000_Beverages | 29 | 42 | -13 | 4 | 1   | D |
| 92610020 | Horchata beverage, made with water                                                                               | 10000_Beverages | 29 | 26 | 3   | 1 | 3   | E |
| 41440050 | Ensure Plus liquid nutrition                                                                                     | 10000_Beverages | 28 | 39 | -11 | 4 | 2.5 | E |
| 95312900 | Energy drink (XS)                                                                                                | 10000_Beverages | 28 | 29 | -1  | 4 | 3.5 | B |
| 95312905 | Energy drink (XS Gold Plus)                                                                                      | 10000_Beverages | 28 | 29 | -1  | 4 | 3.5 | B |
| 92101800 | Coffee, Cuban                                                                                                    | 10000_Beverages | 27 | 33 | -6  | 2 | 3.5 | D |
| 95312600 | Energy drink, sugar-free (Red Bull)                                                                              | 10000_Beverages | 27 | 32 | -5  | 4 | 3.5 | B |
| 92121030 | Coffee, mocha, instant, pre-lightened and pre-sweetened with low calorie sweetener, reconstituted                | 10000_Beverages | 27 | 30 | -3  | 4 | 4   | B |
| 92121050 | Coffee, mocha, instant, decaffeinated, pre-lightened and pre-sweetened with low calorie sweetener, reconstituted | 10000_Beverages | 27 | 30 | -3  | 4 | 4   | B |
| 92102600 | Coffee, Iced Cafe Mocha                                                                                          | 10000_Beverages | 27 | 27 | 0   | 3 | 3.5 | D |
| 92611600 | Horchata beverage, NFS                                                                                           | 10000_Beverages | 26 | 29 | -3  | 3 | 0.5 | E |



|          |                                                                                |                 |    |    |     |   |     |   |
|----------|--------------------------------------------------------------------------------|-----------------|----|----|-----|---|-----|---|
| 92650005 | Red Bull Energy Drink, sugar-free                                              | 10000_Beverages | 26 | 29 | -3  | 4 | 3.5 | B |
| 92130030 | Coffee, pre-sweetened with low calorie sweetener                               | 10000_Beverages | 26 | 27 | -1  | 4 | 4   | B |
| 92130031 | Coffee, decaffeinated, pre-sweetened with low calorie sweetener                | 10000_Beverages | 26 | 27 | -1  | 4 | 4   | B |
| 92550360 | Apple juice beverage, 40-50% juice, light                                      | 10000_Beverages | 25 | 36 | -11 | 4 | 2   | B |
| 11631000 | High calorie beverage, canned or powdered, reconstituted                       | 10000_Beverages | 25 | 33 | -8  | 4 | 3   | E |
| 92511340 | Pineapple-orange juice drink                                                   | 10000_Beverages | 24 | 35 | -11 | 4 | 0.5 | E |
| 92101923 | Frozen coffee drink, with non-dairy milk                                       | 10000_Beverages | 24 | 29 | -5  | 2 | 2.5 | E |
| 92101921 | Frozen coffee drink, nonfat                                                    | 10000_Beverages | 24 | 27 | -3  | 2 | 2.5 | E |
| 92611100 | Oatmeal beverage with milk                                                     | 10000_Beverages | 24 | 26 | -2  | 2 | 2.5 | E |
| 92552000 | Fruit flavored drink, made from powdered mix, low calorie, with high vitamin C | 10000_Beverages | 24 | 25 | -1  | 4 | 3.5 | B |
| 95312560 | Energy drink (Ocean Spray Cran-Energy Juice Drink)                             | 10000_Beverages | 24 | 25 | -1  | 4 | 2   | B |
| 11561010 | Cafe con leche prepared with sugar                                             | 10000_Beverages | 24 | 23 | 1   | 1 | 3.5 | D |
| 64201500 | Banana nectar                                                                  | 10000_Beverages | 23 | 36 | -13 | 4 | 0.5 | E |
| 92510730 | Fruit punch, made with soda, fruit juice, and sherbet or ice cream             | 10000_Beverages | 23 | 32 | -9  | 3 | 0.5 | E |
| 92171000 | Coffee, bottled/canned                                                         | 10000_Beverages | 23 | 31 | -8  | 4 | 3.5 | E |
| 92510200 | Apple-orange-pineapple juice drink                                             | 10000_Beverages | 23 | 30 | -7  | 4 | 0.5 | E |
| 92101931 | Frozen coffee drink, decaffeinated, nonfat                                     | 10000_Beverages | 23 | 27 | -4  | 2 | 2.5 | E |
| 92512090 | Pina Colada, nonalcoholic                                                      | 10000_Beverages | 23 | 26 | -3  | 2 | 0.5 | E |
| 92102010 | Frozen mocha coffee drink, nonfat                                              | 10000_Beverages | 22 | 26 | -4  | 3 | 3   | E |
| 92613510 | Cornmeal beverage with chocolate milk                                          | 10000_Beverages | 22 | 23 | -1  | 2 | 1.5 | E |
| 92511270 | Orange-peach juice drink                                                       | 10000_Beverages | 21 | 37 | -16 | 4 | 0.5 | E |
| 92550030 | Fruit juice drink, with high vitamin C, light                                  | 10000_Beverages | 21 | 36 | -15 | 4 | 2   | B |
| 92550110 | Cranberry juice drink, with high vitamin C, light                              | 10000_Beverages | 21 | 36 | -15 | 4 | 2   | B |
| 64203020 | Guava nectar                                                                   | 10000_Beverages | 21 | 34 | -13 | 4 | 0.5 | E |
| 94210300 | Water, bottled, flavored (SoBe Life Water)                                     | 10000_Beverages | 21 | 23 | -2  | 4 | 4.5 | B |
| 92510950 | Guava juice drink                                                              | 10000_Beverages | 20 | 35 | -15 | 4 | 0.5 | E |
| 92530840 | Guava juice drink with vitamin C added                                         | 10000_Beverages | 20 | 35 | -15 | 4 | 0.5 | E |
| 92102020 | Frozen mocha coffee drink, with non-dairy milk                                 | 10000_Beverages | 20 | 28 | -8  | 3 | 3   | E |
| 92306100 | Corn beverage                                                                  | 10000_Beverages | 20 | 5  | 15  | 1 | 3.5 | C |
| 92611010 | Oatmeal beverage with water                                                    | 10000_Beverages | 19 | 22 | -3  | 2 | 3   | E |
| 92101926 | Frozen coffee drink, nonfat, with whipped cream                                | 10000_Beverages | 19 | 20 | -1  | 2 | 3   | E |
| 92101936 | Frozen coffee drink, decaffeinated, nonfat, with whipped cream                 | 10000_Beverages | 19 | 20 | -1  | 2 | 3   | E |
| 92613010 | Cornmeal beverage                                                              | 10000_Beverages | 19 | 19 | 0   | 2 | 2.5 | E |
| 92101920 | Frozen coffee drink                                                            | 10000_Beverages | 18 | 20 | -2  | 2 | 2.5 | E |
| 92101925 | Frozen coffee drink, with whipped cream                                        | 10000_Beverages | 18 | 19 | -1  | 2 | 2.5 | E |
| 92101930 | Frozen coffee drink, decaffeinated                                             | 10000_Beverages | 18 | 19 | -1  | 2 | 2.5 | E |
| 92101935 | Frozen coffee drink, decaffeinated, with whipped cream                         | 10000_Beverages | 18 | 19 | -1  | 2 | 2.5 | E |
| 92102030 | Frozen mocha coffee drink, with whipped cream                                  | 10000_Beverages | 18 | 18 | 0   | 3 | 2.5 | E |

|          |                                                                                                           |                 |    |    |     |   |     |   |
|----------|-----------------------------------------------------------------------------------------------------------|-----------------|----|----|-----|---|-----|---|
| 92102090 | Frozen mocha coffee drink, decaffeinated, with whipped cream                                              | 10000_Beverages | 18 | 18 | 0   | 3 | 2.5 | E |
| 92101600 | Coffee, Turkish                                                                                           | 10000_Beverages | 17 | 23 | -6  | 2 | 3.5 | D |
| 92102000 | Frozen mocha coffee drink                                                                                 | 10000_Beverages | 17 | 18 | -1  | 2 | 3   | E |
| 92102040 | Frozen mocha coffee drink, nonfat, with whipped cream                                                     | 10000_Beverages | 17 | 18 | -1  | 3 | 3   | E |
| 92307500 | Iced Tea / Lemonade juice drink                                                                           | 10000_Beverages | 16 | 36 | -20 | 4 | 1.5 | D |
| 92531020 | Orange breakfast drink, made from frozen concentrate                                                      | 10000_Beverages | 15 | 30 | -15 | 4 | 0.5 | E |
| 92130011 | Coffee, decaffeinated, pre-lightened                                                                      | 10000_Beverages | 15 | 16 | -1  | 4 | 4   | B |
| 64204010 | Mango nectar                                                                                              | 10000_Beverages | 14 | 27 | -13 | 4 | 0.5 | E |
| 92510820 | Grape juice drink                                                                                         | 10000_Beverages | 14 | 25 | -11 | 4 | 0.5 | E |
| 92308530 | Tea, iced, brewed, green, decaffeinated, pre-sweetened with sugar                                         | 10000_Beverages | 14 | 21 | -7  | 3 | 1   | D |
| 92102050 | Frozen mocha coffee drink, with non-dairy milk and whipped cream                                          | 10000_Beverages | 14 | 20 | -6  | 3 | 2.5 | E |
| 92510170 | Apple-cranberry-grape juice drink                                                                         | 10000_Beverages | 14 | 19 | -5  | 4 | 0.5 | D |
| 92511260 | Orange-cranberry juice drink                                                                              | 10000_Beverages | 14 | 19 | -5  | 4 | 1   | D |
| 42404010 | Coconut water, sweetened                                                                                  | 10000_Beverages | 14 | 15 | -1  | 3 | 0.5 | C |
| 92121041 | Coffee, instant, decaffeinated, pre-lightened and pre-sweetened with low calorie sweetener, reconstituted | 10000_Beverages | 14 | 15 | -1  | 4 | 4   | B |
| 92130010 | Coffee, pre-lightened                                                                                     | 10000_Beverages | 14 | 15 | -1  | 4 | 4   | B |
| 92309010 | Tea, iced, bottled, black, decaffeinated                                                                  | 10000_Beverages | 14 | 15 | -1  | 1 | 0.5 | D |
| 92611510 | Horchata beverage, made with rice                                                                         | 10000_Beverages | 14 | 15 | -1  | 2 | 0.5 | E |
| 92121040 | Coffee, instant, pre-lightened and pre-sweetened with low calorie sweetener, reconstituted                | 10000_Beverages | 13 | 14 | -1  | 4 | 4   | B |
| 92130005 | Coffee, pre-lightened and pre-sweetened with low calorie sweetener                                        | 10000_Beverages | 13 | 14 | -1  | 4 | 4   | B |
| 92130006 | Coffee, decaffeinated, pre-lightened and pre-sweetened with low calorie sweetener                         | 10000_Beverages | 13 | 14 | -1  | 4 | 4   | B |
| 64200100 | Fruit nectar, NFS                                                                                         | 10000_Beverages | 12 | 27 | -15 | 4 | 0.5 | E |
| 92308000 | Tea, iced, brewed, black, pre-sweetened with sugar                                                        | 10000_Beverages | 12 | 19 | -7  | 3 | 1   | D |
| 92308030 | Tea, iced, brewed, black, decaffeinated, pre-sweetened with sugar                                         | 10000_Beverages | 12 | 19 | -7  | 3 | 1   | D |
| 92530950 | Vegetable and fruit juice drink, with high vitamin C                                                      | 10000_Beverages | 12 | 14 | -2  | 4 | 2   | C |
| 64213010 | Passion fruit nectar                                                                                      | 10000_Beverages | 11 | 27 | -16 | 4 | 0.5 | E |
| 64201010 | Apricot nectar                                                                                            | 10000_Beverages | 11 | 25 | -14 | 4 | 0.5 | E |
| 92171010 | Coffee, bottled/canned, light                                                                             | 10000_Beverages | 11 | 18 | -7  | 4 | 3.5 | C |
| 92308500 | Tea, iced, brewed, green, pre-sweetened with sugar                                                        | 10000_Beverages | 10 | 17 | -7  | 3 | 1   | D |
| 92204000 | Mate, sweetened beverage made from dried green leaves                                                     | 10000_Beverages | 10 | 15 | -5  | 2 | 2   | C |
| 64210010 | Papaya nectar                                                                                             | 10000_Beverages | 9  | 24 | -15 | 4 | 0.5 | E |
| 92121020 | Coffee, mocha, instant, pre-lightened and pre-sweetened with sugar, reconstituted                         | 10000_Beverages | 9  | 17 | -8  | 4 | 4   | C |
| 95312410 | Energy drink, sugar free (Monster)                                                                        | 10000_Beverages | 8  | 11 | -3  | 4 | 3   | B |
| 64215010 | Pear nectar                                                                                               | 10000_Beverages | 7  | 21 | -14 | 4 | 0.5 | E |
| 92511200 | Orange-mango juice drink                                                                                  | 10000_Beverages | 7  | 21 | -14 | 4 | 0.5 | E |
| 92530610 | Fruit juice drink, with high vitamin C                                                                    | 10000_Beverages | 7  | 21 | -14 | 4 | 0.5 | E |
| 64202010 | Cantaloupe nectar                                                                                         | 10000_Beverages | 6  | 21 | -15 | 4 | 0.5 | E |

|          |                                                                                  |                 |   |    |     |   |     |   |
|----------|----------------------------------------------------------------------------------|-----------------|---|----|-----|---|-----|---|
| 92582110 | Fruit juice drink, added calcium (Sunny D)                                       | 10000_Beverages | 5 | 20 | -15 | 4 | 0.5 | E |
| 64221010 | Soursop, nectar                                                                  | 10000_Beverages | 5 | 15 | -10 | 4 | 0.5 | D |
| 94210100 | Water, bottled, flavored (Propel Water)                                          | 10000_Beverages | 5 | 7  | -2  | 4 | 4.5 | B |
| 94220100 | Propel Zero Water                                                                | 10000_Beverages | 5 | 7  | -2  | 4 | 4.5 | B |
| 92530310 | Cherry drink with vitamin C added                                                | 10000_Beverages | 4 | 17 | -13 | 4 | 0.5 | E |
| 92530810 | Grapefruit juice drink with vitamin C added                                      | 10000_Beverages | 4 | 16 | -12 | 4 | 0.5 | E |
| 92510910 | Grapefruit juice drink                                                           | 10000_Beverages | 3 | 15 | -12 | 4 | 0.5 | E |
| 92511220 | Orange drink                                                                     | 10000_Beverages | 3 | 7  | -4  | 4 | 1   | C |
| 92553000 | Fruit-flavored thirst quencher beverage, low calorie                             | 10000_Beverages | 3 | 1  | 2   | 4 | 3   | B |
| 92542000 | Fruit flavored drink, with high vitamin C, powdered, reconstituted               | 10000_Beverages | 2 | 16 | -14 | 4 | 0.5 | E |
| 92531030 | Fruit juice drink (Sunny D)                                                      | 10000_Beverages | 1 | 14 | -13 | 4 | 0.5 | E |
| 92305000 | Tea, made from powdered instant, presweetened, NS as to sweetener                | 10000_Beverages | 1 | 13 | -12 | 4 | 1   | D |
| 92305040 | Tea, iced, instant, black, pre-sweetened with sugar                              | 10000_Beverages | 1 | 13 | -12 | 4 | 1   | D |
| 92510150 | Apple juice drink                                                                | 10000_Beverages | 1 | 12 | -11 | 4 | 0.5 | E |
| 92510410 | Black cherry drink                                                               | 10000_Beverages | 1 | 12 | -11 | 4 | 0.5 | E |
| 92301190 | Tea, NS as to type, decaffeinated, presweetened, NS as to sweetener              | 10000_Beverages | 1 | 11 | -10 | 4 | 2   | C |
| 92302800 | Tea, leaf, decaffeinated, presweetened, NS as to sweetener                       | 10000_Beverages | 1 | 11 | -10 | 4 | 2   | C |
| 92511000 | Lemonade, frozen concentrate, not reconstituted                                  | 10000_Beverages | 1 | 11 | -10 | 4 | 0.5 | E |
| 92302600 | Tea, leaf, decaffeinated, presweetened with sugar                                | 10000_Beverages | 1 | 10 | -9  | 4 | 2   | C |
| 94100300 | Water, bottled, flavored (Capri Sun Roarin' Waters)                              | 10000_Beverages | 1 | 10 | -9  | 4 | 2   | B |
| 64205010 | Peach nectar                                                                     | 10000_Beverages | 1 | 9  | -8  | 4 | 0.5 | E |
| 92530510 | Cranberry juice drink, with high vitamin C                                       | 10000_Beverages | 1 | 9  | -8  | 4 | 0.5 | E |
| 92301130 | Tea, NS as to type, presweetened, NS as to sweetener                             | 10000_Beverages | 1 | 8  | -7  | 4 | 1.5 | D |
| 92510630 | Fruit juice drink, NFS                                                           | 10000_Beverages | 1 | 8  | -7  | 4 | 0.5 | E |
| 92530910 | Lemonade with vitamin C added                                                    | 10000_Beverages | 1 | 8  | -7  | 4 | 0.5 | E |
| 94210200 | Water, bottled, flavored (Glaceau Vitamin Water)                                 | 10000_Beverages | 1 | 8  | -7  | 4 | 1.5 | C |
| 92130021 | Coffee, decaffeinated, pre-sweetened with sugar                                  | 10000_Beverages | 1 | 7  | -6  | 4 | 4   | C |
| 92301060 | Tea, NS as to type, presweetened with sugar                                      | 10000_Beverages | 1 | 7  | -6  | 4 | 1   | D |
| 92301160 | Tea, NS as to type, decaffeinated, presweetened with sugar                       | 10000_Beverages | 1 | 7  | -6  | 4 | 1   | D |
| 92302200 | Tea, leaf, presweetened with sugar                                               | 10000_Beverages | 1 | 7  | -6  | 4 | 1   | D |
| 92302400 | Tea, leaf, presweetened, NS as to sweetener                                      | 10000_Beverages | 1 | 7  | -6  | 4 | 1   | D |
| 92305800 | Tea, made from powdered instant, decaffeinated, presweetened, NS as to sweetener | 10000_Beverages | 1 | 6  | -5  | 4 | 2.5 | C |
| 92531010 | Orange drink and orangeade with vitamin C added                                  | 10000_Beverages | 1 | 5  | -4  | 4 | 0.5 | E |
| 95310700 | Energy drink (Rockstar)                                                          | 10000_Beverages | 1 | 5  | -4  | 4 | 0.5 | E |
| 92510810 | Grapeade and grape drink                                                         | 10000_Beverages | 1 | 4  | -3  | 4 | 1   | C |
| 95310550 | Energy drink (No Fear)                                                           | 10000_Beverages | 1 | 4  | -3  | 4 | 0.5 | E |
| 95310555 | Energy drink (No Fear Motherload)                                                | 10000_Beverages | 1 | 4  | -3  | 4 | 0.5 | E |
| 92121010 | Coffee, instant, pre-sweetened with sugar, reconstituted                         | 10000_Beverages | 1 | 3  | -2  | 4 | 4   | C |

|          |                                                                                           |                 |   |   |    |   |     |   |
|----------|-------------------------------------------------------------------------------------------|-----------------|---|---|----|---|-----|---|
| 92130020 | Coffee, pre-sweetened with sugar                                                          | 10000_Beverages | 1 | 3 | -2 | 4 | 4   | C |
| 92550370 | Lemonade, fruit juice drink, light                                                        | 10000_Beverages | 1 | 3 | -2 | 4 | 2   | B |
| 95312400 | Energy drink, low calorie (Monster)                                                       | 10000_Beverages | 1 | 3 | -2 | 4 | 3   | B |
| 92102450 | Iced Coffee, pre-lightened and pre-sweetened                                              | 10000_Beverages | 1 | 2 | -1 | 4 | 4   | C |
| 92305050 | Tea, iced, instant, black, decaffeinated, pre-sweetened with sugar                        | 10000_Beverages | 1 | 2 | -1 | 4 | 1   | D |
| 92306020 | Tea, herbal, presweetened with sugar                                                      | 10000_Beverages | 1 | 2 | -1 | 4 | 2   | C |
| 92306040 | Tea, herbal, presweetened, NS as to sweetener                                             | 10000_Beverages | 1 | 2 | -1 | 4 | 2   | C |
| 92309000 | Tea, iced, bottled, black                                                                 | 10000_Beverages | 1 | 2 | -1 | 4 | 0.5 | E |
| 92511110 | Limeade                                                                                   | 10000_Beverages | 1 | 2 | -1 | 4 | 0.5 | E |
| 92511240 | Orange-lemon drink                                                                        | 10000_Beverages | 1 | 2 | -1 | 4 | 0.5 | E |
| 92530520 | Cranberry-apple juice drink with vitamin C added                                          | 10000_Beverages | 1 | 2 | -1 | 4 | 0.5 | E |
| 92552030 | Fruit juice drink (Capri Sun)                                                             | 10000_Beverages | 1 | 2 | -1 | 4 | 0.5 | E |
| 75200700 | Aloe vera juice drink                                                                     | 10000_Beverages | 1 | 1 | 0  | 1 | 2   | B |
| 92121000 | Coffee, instant, pre-lightened and pre-sweetened with sugar, reconstituted                | 10000_Beverages | 1 | 1 | 0  | 4 | 4   | C |
| 92121001 | Coffee, instant, decaffeinated, pre-lightened and pre-sweetened with sugar, reconstituted | 10000_Beverages | 1 | 1 | 0  | 4 | 4   | C |
| 92130000 | Coffee, pre-lightened and pre-sweetened with sugar                                        | 10000_Beverages | 1 | 1 | 0  | 4 | 4   | C |
| 92130001 | Coffee, decaffeinated, pre-lightened and pre-sweetened with sugar                         | 10000_Beverages | 1 | 1 | 0  | 4 | 4   | C |
| 92305910 | Tea, iced, instant, green, pre-sweetened with sugar                                       | 10000_Beverages | 1 | 1 | 0  | 4 | 1.5 | C |
| 92309500 | Tea, iced, bottled, green                                                                 | 10000_Beverages | 1 | 1 | 0  | 4 | 1.5 | B |
| 92400000 | Soft drink, NFS                                                                           | 10000_Beverages | 1 | 1 | 0  | 4 | 0.5 | E |
| 92410110 | Carbonated water, sweetened                                                               | 10000_Beverages | 1 | 1 | 0  | 4 | 1   | D |
| 92410310 | Soft drink, cola                                                                          | 10000_Beverages | 1 | 1 | 0  | 4 | 0.5 | E |
| 92410315 | Soft drink, cola, reduced sugar                                                           | 10000_Beverages | 1 | 1 | 0  | 4 | 2   | B |
| 92410330 | Soft drink, cola-type, with higher caffeine                                               | 10000_Beverages | 1 | 1 | 0  | 4 | 0.5 | E |
| 92410340 | Soft drink, cola, decaffeinated                                                           | 10000_Beverages | 1 | 1 | 0  | 4 | 0.5 | E |
| 92410360 | Soft drink, pepper type                                                                   | 10000_Beverages | 1 | 1 | 0  | 4 | 0.5 | E |
| 92410390 | Soft drink, pepper type, decaffeinated                                                    | 10000_Beverages | 1 | 1 | 0  | 4 | 0.5 | E |
| 92410410 | Soft drink, cream soda                                                                    | 10000_Beverages | 1 | 1 | 0  | 4 | 0.5 | E |
| 92410510 | Soft drink, fruit flavored, caffeine free                                                 | 10000_Beverages | 1 | 1 | 0  | 4 | 0.5 | E |
| 92410550 | Soft drink, fruit flavored, caffeine containing                                           | 10000_Beverages | 1 | 1 | 0  | 4 | 0.5 | E |
| 92410610 | Soft drink, ginger ale                                                                    | 10000_Beverages | 1 | 1 | 0  | 4 | 1   | D |
| 92410710 | Soft drink, root beer                                                                     | 10000_Beverages | 1 | 1 | 0  | 4 | 0.5 | E |
| 92410810 | Soft drink, chocolate flavored                                                            | 10000_Beverages | 1 | 1 | 0  | 4 | 0.5 | E |
| 92411510 | Soft drink, cola, fruit or vanilla flavored                                               | 10000_Beverages | 1 | 1 | 0  | 4 | 0.5 | E |
| 92411520 | Soft drink, cola, chocolate flavored                                                      | 10000_Beverages | 1 | 1 | 0  | 4 | 0.5 | E |
| 92416010 | Mavi drink                                                                                | 10000_Beverages | 1 | 1 | 0  | 4 | 0.5 | E |
| 92417010 | Soft drink, ale type                                                                      | 10000_Beverages | 1 | 1 | 0  | 4 | 0.5 | D |
| 92510120 | Apple-cherry drink                                                                        | 10000_Beverages | 1 | 1 | 0  | 4 | 0.5 | E |

|          |                                                                                                                      |                 |   |   |   |   |     |   |
|----------|----------------------------------------------------------------------------------------------------------------------|-----------------|---|---|---|---|-----|---|
| 92510610 | Fruit juice drink                                                                                                    | 10000_Beverages | 1 | 1 | 0 | 4 | 2.5 | C |
| 92510955 | Lemonade, fruit juice drink                                                                                          | 10000_Beverages | 1 | 1 | 0 | 4 | 0.5 | E |
| 92510960 | Lemonade, fruit flavored drink                                                                                       | 10000_Beverages | 1 | 1 | 0 | 4 | 1.5 | D |
| 92511010 | Fruit flavored drink (formerly lemonade)                                                                             | 10000_Beverages | 1 | 1 | 0 | 4 | 0.5 | E |
| 92511015 | Fruit flavored drink                                                                                                 | 10000_Beverages | 1 | 1 | 0 | 4 | 0.5 | E |
| 92511400 | Raspberry-flavored drink                                                                                             | 10000_Beverages | 1 | 1 | 0 | 4 | 0.5 | E |
| 92511510 | Strawberry-flavored drink                                                                                            | 10000_Beverages | 1 | 1 | 0 | 4 | 2   | E |
| 92512040 | Frozen daiquiri mix, frozen concentrate, not reconstituted                                                           | 10000_Beverages | 1 | 1 | 0 | 4 | 0.5 | E |
| 92512050 | Frozen daiquiri mix, from frozen concentrate, reconstituted                                                          | 10000_Beverages | 1 | 1 | 0 | 4 | 0.5 | D |
| 92512110 | Margarita mix, nonalcoholic                                                                                          | 10000_Beverages | 1 | 1 | 0 | 4 | 0.5 | E |
| 92513000 | Slush frozen drink                                                                                                   | 10000_Beverages | 1 | 1 | 0 | 4 | 1   | D |
| 92513010 | Slush frozen drink, no sugar added                                                                                   | 10000_Beverages | 1 | 1 | 0 | 4 | 2.5 | B |
| 92530410 | Fruit flavored drink, with high vitamin C                                                                            | 10000_Beverages | 1 | 1 | 0 | 4 | 1.5 | C |
| 92530710 | Grape drink with vitamin C added                                                                                     | 10000_Beverages | 1 | 1 | 0 | 4 | 0.5 | E |
| 92541010 | Fruit flavored drink, powdered, reconstituted                                                                        | 10000_Beverages | 1 | 1 | 0 | 4 | 1.5 | D |
| 92541020 | Lemonade-flavored drink, made from powdered mix, with sugar                                                          | 10000_Beverages | 1 | 1 | 0 | 4 | 0.5 | E |
| 92541100 | Apple cider-flavored drink, made from powdered mix, with sugar and vitamin C added                                   | 10000_Beverages | 1 | 1 | 0 | 4 | 1   | D |
| 92544000 | Fruit-flavored drink, made from unsweetened powdered mix (fortified with vitamin C), with sugar added in preparation | 10000_Beverages | 1 | 1 | 0 | 4 | 0.5 | E |
| 92550035 | Fruit juice drink, light                                                                                             | 10000_Beverages | 1 | 1 | 0 | 4 | 0.5 | E |
| 92550610 | Fruit flavored drink, low calorie, with high vitamin C                                                               | 10000_Beverages | 1 | 1 | 0 | 4 | 0.5 | D |
| 92560000 | Fruit-flavored thirst quencher beverage                                                                              | 10000_Beverages | 1 | 1 | 0 | 4 | 1.5 | C |
| 92560100 | Gatorade Thirst Quencher sports drink                                                                                | 10000_Beverages | 1 | 1 | 0 | 4 | 1.5 | C |
| 92560200 | Powerade sports drink                                                                                                | 10000_Beverages | 1 | 1 | 0 | 4 | 1   | D |
| 92565100 | Gatorade G2 thirst quencher sports drink, low calorie                                                                | 10000_Beverages | 1 | 1 | 0 | 4 | 3   | B |
| 92570100 | Fluid replacement, electrolyte solution                                                                              | 10000_Beverages | 1 | 1 | 0 | 4 | 2.5 | C |
| 92570500 | Fluid replacement, 5% glucose in water                                                                               | 10000_Beverages | 1 | 1 | 0 | 4 | 2   | C |
| 92582100 | Fruit juice drink, with high vitamin C, plus added calcium                                                           | 10000_Beverages | 1 | 1 | 0 | 4 | 0.5 | E |
| 92582120 | Fruit flavored drink, reduced sugar, with high vitamin C, plus added calcium                                         | 10000_Beverages | 1 | 1 | 0 | 4 | 1.5 | C |
| 92612010 | Sugar cane beverage                                                                                                  | 10000_Beverages | 1 | 1 | 0 | 4 | 0.5 | E |
| 92650000 | Red Bull Energy Drink                                                                                                | 10000_Beverages | 1 | 1 | 0 | 4 | 0.5 | E |
| 92650100 | Full Throttle Energy Drink                                                                                           | 10000_Beverages | 1 | 1 | 0 | 4 | 0.5 | E |
| 92650200 | Monster Energy Drink                                                                                                 | 10000_Beverages | 1 | 1 | 0 | 4 | 0.5 | E |
| 92650205 | Mountain Dew AMP Energy Drink                                                                                        | 10000_Beverages | 1 | 1 | 0 | 4 | 0.5 | E |
| 92650700 | Rockstar Energy Drink                                                                                                | 10000_Beverages | 1 | 1 | 0 | 4 | 0.5 | E |
| 92650800 | Vault Energy Drink                                                                                                   | 10000_Beverages | 1 | 1 | 0 | 4 | 0.5 | E |
| 92651000 | Energy drink                                                                                                         | 10000_Beverages | 1 | 1 | 0 | 4 | 0.5 | E |
| 92731000 | Fruit-flavored drink, non-carbonated, made from powdered mix, with sugar                                             | 10000_Beverages | 1 | 1 | 0 | 4 | 1   | D |

|          |                                                    |                 |     |     |   |   |     |   |
|----------|----------------------------------------------------|-----------------|-----|-----|---|---|-----|---|
| 92803000 | Nonalcoholic malt beverage                         | 10000_Beverages | 1   | 1   | 0 | 4 | 0.5 | E |
| 92804000 | Shirley Temple                                     | 10000_Beverages | 1   | 1   | 0 | 4 | 0.5 | E |
| 95310200 | Energy drink (Full Throttle)                       | 10000_Beverages | 1   | 1   | 0 | 4 | 0.5 | E |
| 95310400 | Energy drink (Monster)                             | 10000_Beverages | 1   | 1   | 0 | 4 | 0.5 | E |
| 95310500 | Energy drink (Mountain Dew AMP)                    | 10000_Beverages | 1   | 1   | 0 | 4 | 0.5 | E |
| 95310560 | Energy drink (NOS)                                 | 10000_Beverages | 1   | 1   | 0 | 4 | 0.5 | E |
| 95310600 | Energy drink (Red Bull)                            | 10000_Beverages | 1   | 1   | 0 | 4 | 0.5 | E |
| 95310750 | Energy drink (SoBe Energize Energy Juice Drink)    | 10000_Beverages | 1   | 1   | 0 | 4 | 0.5 | E |
| 95310800 | Energy drink (Vault)                               | 10000_Beverages | 1   | 1   | 0 | 4 | 0.5 | E |
| 92651000 | Energy Drink                                       | 10000_Beverages | 1   | 1   | 0 | 4 | 0.5 | E |
| 95320200 | Sports drink (Gatorade G)                          | 10000_Beverages | 1   | 1   | 0 | 4 | 1.5 | C |
| 95320500 | Sports drink (Powerade)                            | 10000_Beverages | 1   | 1   | 0 | 4 | 1   | D |
| 95321000 | Sports drink, NFS                                  | 10000_Beverages | 1   | 1   | 0 | 4 | 1.5 | C |
| 95322200 | Sports drink, low calorie (Gatorade G2)            | 10000_Beverages | 1   | 1   | 0 | 4 | 3   | B |
| 95323000 | Sports drink, low calorie                          | 10000_Beverages | 1   | 1   | 0 | 4 | 3   | B |
| 92570100 | Fluid replacement, electrolyte solution            | 10000_Beverages | 1   | 1   | 0 | 4 | 2.5 | C |
| 92570500 | Fluid replacement, 5% glucose in water             | 10000_Beverages | 1   | 1   | 0 | 4 | 2   | C |
| 61104010 | Grapefruit and orange sections, raw                | 2000_Fruit      | 100 | 100 | 0 | 1 | 5   | A |
| 61113010 | Lemon, raw                                         | 2000_Fruit      | 100 | 100 | 0 | 1 | 5   | A |
| 61116010 | Lime, raw                                          | 2000_Fruit      | 100 | 100 | 0 | 1 | 5   | A |
| 61119010 | Orange, raw                                        | 2000_Fruit      | 100 | 100 | 0 | 1 | 5   | A |
| 61125000 | Tangelo, raw                                       | 2000_Fruit      | 100 | 100 | 0 | 1 | 5   | A |
| 63103010 | Apricot, raw                                       | 2000_Fruit      | 100 | 100 | 0 | 1 | 5   | A |
| 63103120 | Apricot, cooked or canned, unsweetened, water pack | 2000_Fruit      | 100 | 100 | 0 | 1 | 5   | A |
| 63109010 | Cantaloupe, raw                                    | 2000_Fruit      | 100 | 100 | 0 | 1 | 5   | A |
| 63109700 | Starfruit, raw                                     | 2000_Fruit      | 100 | 100 | 0 | 1 | 5   | A |
| 63110010 | Cassaba melon, raw                                 | 2000_Fruit      | 100 | 100 | 0 | 1 | 5   | A |
| 63125010 | Guava, raw                                         | 2000_Fruit      | 100 | 100 | 0 | 1 | 5   | A |
| 63131010 | Nectarine, raw                                     | 2000_Fruit      | 100 | 100 | 0 | 1 | 5   | A |
| 63133010 | Papaya, raw                                        | 2000_Fruit      | 100 | 100 | 0 | 1 | 5   | A |
| 63135120 | Peach, cooked or canned, unsweetened, water pack   | 2000_Fruit      | 100 | 100 | 0 | 1 | 5   | A |
| 63147010 | Rhubarb, raw                                       | 2000_Fruit      | 100 | 100 | 0 | 1 | 5   | A |
| 63147120 | Rhubarb, cooked or canned, unsweetened             | 2000_Fruit      | 100 | 100 | 0 | 1 | 5   | A |
| 63200100 | Berries, NFS                                       | 2000_Fruit      | 100 | 100 | 0 | 1 | 4.5 | A |
| 63201010 | Blackberries, raw                                  | 2000_Fruit      | 100 | 100 | 0 | 1 | 5   | A |
| 63201600 | Blackberries, frozen                               | 2000_Fruit      | 100 | 100 | 0 | 1 | 5   | A |
| 63205010 | Boysenberries, raw                                 | 2000_Fruit      | 100 | 100 | 0 | 1 | 5   | A |
| 63205600 | Boysenberries, frozen                              | 2000_Fruit      | 100 | 100 | 0 | 1 | 5   | A |
| 63207010 | Cranberries, raw                                   | 2000_Fruit      | 100 | 100 | 0 | 1 | 5   | A |

|          |                                                                 |            |     |     |    |   |     |   |
|----------|-----------------------------------------------------------------|------------|-----|-----|----|---|-----|---|
| 63215010 | Loganberries, raw                                               | 2000_Fruit | 100 | 100 | 0  | 1 | 5   | A |
| 63217010 | Mulberries, raw                                                 | 2000_Fruit | 100 | 100 | 0  | 1 | 5   | A |
| 63219000 | Raspberries, raw                                                | 2000_Fruit | 100 | 100 | 0  | 1 | 5   | A |
| 63219020 | Raspberries, red, raw                                           | 2000_Fruit | 100 | 100 | 0  | 1 | 5   | A |
| 63219120 | Raspberries, cooked or canned, unsweetened, water pack          | 2000_Fruit | 100 | 100 | 0  | 1 | 5   | A |
| 63219610 | Raspberries, frozen                                             | 2000_Fruit | 100 | 100 | 0  | 1 | 5   | A |
| 63223020 | Strawberries, raw                                               | 2000_Fruit | 100 | 100 | 0  | 1 | 5   | A |
| 63223120 | Strawberries, cooked or canned, unsweetened, water pack         | 2000_Fruit | 100 | 100 | 0  | 1 | 5   | A |
| 63223610 | Strawberries, frozen                                            | 2000_Fruit | 100 | 100 | 0  | 1 | 4.5 | A |
| 63311180 | Fruit mixture, frozen                                           | 2000_Fruit | 100 | 100 | 0  | 1 | 4   | A |
| 63126500 | Kiwi fruit, raw                                                 | 2000_Fruit | 100 | 99  | 1  | 1 | 5   | A |
| 63137050 | Pear, Asian, raw                                                | 2000_Fruit | 100 | 96  | 4  | 1 | 5   | A |
| 61122350 | Orange, mandarin, canned or frozen, drained                     | 2000_Fruit | 99  | 100 | -1 | 3 | 4   | A |
| 61101010 | Grapefruit, raw                                                 | 2000_Fruit | 99  | 99  | 0  | 1 | 5   | A |
| 63149010 | Watermelon, raw                                                 | 2000_Fruit | 98  | 100 | -2 | 1 | 5   | A |
| 63311050 | Fruit salad, fresh or raw, including citrus fruits, no dressing | 2000_Fruit | 98  | 98  | 0  | 1 | 5   | A |
| 61110010 | Kumquat, raw                                                    | 2000_Fruit | 98  | 92  | 6  | 1 | 5   | A |
| 63200200 | Berries, frozen, NFS                                            | 2000_Fruit | 97  | 98  | -1 | 1 | 4.5 | A |
| 63203570 | Blueberries, frozen, NS as to sweetened or unsweetened          | 2000_Fruit | 97  | 98  | -1 | 1 | 4.5 | A |
| 63203600 | Blueberries, frozen                                             | 2000_Fruit | 97  | 98  | -1 | 1 | 4.5 | A |
| 63135620 | Peach, frozen                                                   | 2000_Fruit | 97  | 97  | 0  | 1 | 4.5 | A |
| 63135010 | Peach, raw                                                      | 2000_Fruit | 97  | 96  | 1  | 1 | 5   | A |
| 63311080 | Fruit cocktail or mix, frozen                                   | 2000_Fruit | 97  | 96  | 1  | 1 | 4.5 | A |
| 63134010 | Passion fruit, raw                                              | 2000_Fruit | 97  | 89  | 8  | 1 | 5   | A |
| 62114000 | Lychee, dried                                                   | 2000_Fruit | 96  | 98  | -2 | 1 | 3   | D |
| 63203010 | Blueberries, raw                                                | 2000_Fruit | 96  | 96  | 0  | 1 | 5   | A |
| 63214000 | Huckleberries, raw                                              | 2000_Fruit | 96  | 96  | 0  | 1 | 5   | A |
| 63311000 | Fruit salad, fresh or raw, excluding citrus fruits, no dressing | 2000_Fruit | 96  | 96  | 0  | 1 | 5   | A |
| 63101000 | Apple, raw                                                      | 2000_Fruit | 95  | 94  | 1  | 1 | 5   | A |
| 62104100 | Apricot, dried                                                  | 2000_Fruit | 94  | 94  | 0  | 1 | 3.5 | D |
| 63143010 | Plum, raw                                                       | 2000_Fruit | 94  | 94  | 0  | 1 | 5   | A |
| 61125010 | Tangerine, raw                                                  | 2000_Fruit | 94  | 93  | 1  | 1 | 5   | A |
| 63100100 | Fruit, NFS                                                      | 2000_Fruit | 94  | 93  | 1  | 1 | 4.5 | A |
| 62116100 | Peach, dried                                                    | 2000_Fruit | 93  | 92  | 1  | 1 | 4   | C |
| 62116220 | Peach, dried, cooked, unsweetened                               | 2000_Fruit | 93  | 91  | 2  | 1 | 3.5 | C |
| 63101320 | Apple, baked, unsweetened                                       | 2000_Fruit | 93  | 91  | 2  | 1 | 5   | A |
| 63129050 | Mango, frozen                                                   | 2000_Fruit | 92  | 93  | -1 | 1 | 4   | A |
| 63141200 | Pineapple, frozen                                               | 2000_Fruit | 92  | 92  | 0  | 1 | 4   | A |
| 63127010 | Honeydew melon, raw                                             | 2000_Fruit | 91  | 93  | -2 | 1 | 5   | A |

|          |                                                                     |            |    |    |    |   |     |   |
|----------|---------------------------------------------------------------------|------------|----|----|----|---|-----|---|
| 63127610 | Honeydew, frozen                                                    | 2000_Fruit | 91 | 93 | -2 | 1 | 4   | A |
| 63141010 | Pineapple, raw                                                      | 2000_Fruit | 91 | 91 | 0  | 1 | 5   | A |
| 63129010 | Mango, raw                                                          | 2000_Fruit | 90 | 91 | -1 | 1 | 5   | A |
| 63141120 | Pineapple, cooked or canned, unsweetened, water pack                | 2000_Fruit | 90 | 90 | 0  | 1 | 5   | A |
| 62104220 | Apricot, dried, cooked, unsweetened                                 | 2000_Fruit | 90 | 88 | 2  | 1 | 3.5 | C |
| 63133050 | Papaya, green, cooked                                               | 2000_Fruit | 89 | 88 | 1  | 1 | 3.5 | A |
| 63139010 | Persimmon, raw                                                      | 2000_Fruit | 89 | 86 | 3  | 1 | 5   | A |
| 63137010 | Pear, raw                                                           | 2000_Fruit | 89 | 84 | 5  | 1 | 5   | A |
| 63123020 | Grapes, American type, slip skin, raw                               | 2000_Fruit | 88 | 89 | -1 | 1 | 5   | A |
| 63113110 | Cherries, sour, red, cooked, unsweetened                            | 2000_Fruit | 88 | 86 | 2  | 1 | 5   | A |
| 61100600 | Clementine, raw                                                     | 2000_Fruit | 87 | 85 | 2  | 1 | 5   | A |
| 63115010 | Cherries, raw                                                       | 2000_Fruit | 87 | 85 | 2  | 1 | 5   | A |
| 63115200 | Cherries, frozen                                                    | 2000_Fruit | 87 | 85 | 2  | 1 | 4   | A |
| 63203120 | Blueberries, cooked or canned, unsweetened, water pack              | 2000_Fruit | 87 | 85 | 2  | 1 | 5   | A |
| 62113100 | Fig, dried                                                          | 2000_Fruit | 87 | 84 | 3  | 1 | 4   | C |
| 63137120 | Pear, cooked or canned, unsweetened, water pack                     | 2000_Fruit | 86 | 81 | 5  | 1 | 5   | A |
| 61122320 | Orange, canned, juice pack                                          | 2000_Fruit | 85 | 92 | -7 | 3 | 3.5 | A |
| 63126510 | Lychee                                                              | 2000_Fruit | 85 | 85 | 0  | 1 | 4   | A |
| 62101100 | Apple, dried                                                        | 2000_Fruit | 85 | 82 | 3  | 1 | 3.5 | D |
| 62113220 | Fig, dried, cooked, unsweetened                                     | 2000_Fruit | 85 | 81 | 4  | 1 | 3.5 | A |
| 61119020 | Orange, sections, canned, juice pack                                | 2000_Fruit | 84 | 88 | -4 | 3 | 3.5 | A |
| 63123000 | Grapes, raw                                                         | 2000_Fruit | 84 | 84 | 0  | 1 | 5   | A |
| 63123010 | Grapes, European type, adherent skin, raw                           | 2000_Fruit | 84 | 84 | 0  | 1 | 5   | A |
| 62122100 | Prune, dried                                                        | 2000_Fruit | 84 | 82 | 2  | 1 | 4   | C |
| 63107010 | Banana, raw                                                         | 2000_Fruit | 83 | 81 | 2  | 1 | 5   | A |
| 63107050 | Banana, white, Guineo blanco maduro                                 | 2000_Fruit | 83 | 81 | 2  | 1 | 4.5 | A |
| 63107070 | Banana, Chinese, raw                                                | 2000_Fruit | 83 | 81 | 2  | 1 | 5   | A |
| 62101220 | Apple, dried, cooked, unsweetened                                   | 2000_Fruit | 83 | 80 | 3  | 1 | 4   | B |
| 63145010 | Pomegranate, raw                                                    | 2000_Fruit | 83 | 79 | 4  | 1 | 5   | A |
| 63403030 | Fruit salad, including citrus fruits, with nondairy whipped topping | 2000_Fruit | 82 | 90 | -8 | 2 | 4   | C |
| 61101220 | Grapefruit, canned or frozen, unsweetened, water pack               | 2000_Fruit | 82 | 82 | 0  | 1 | 5   | A |
| 63126700 | Longans, raw                                                        | 2000_Fruit | 82 | 81 | 1  | 1 | 5   | A |
| 63115120 | Cherries, sweet, cooked, unsweetened, water pack                    | 2000_Fruit | 82 | 80 | 2  | 1 | 5   | B |
| 62122220 | Prune, dried, cooked, unsweetened                                   | 2000_Fruit | 82 | 79 | 3  | 1 | 3.5 | C |
| 63223030 | Strawberries, raw, with sugar                                       | 2000_Fruit | 81 | 87 | -6 | 1 | 4.5 | B |
| 63320100 | Fruit salad, Puerto Rican style                                     | 2000_Fruit | 81 | 81 | 0  | 2 | 4   | A |
| 62119100 | Pear, dried                                                         | 2000_Fruit | 81 | 78 | 3  | 1 | 3.5 | D |
| 63107310 | Banana, ripe, boiled                                                | 2000_Fruit | 81 | 78 | 3  | 1 | 4.5 | B |
| 63403020 | Fruit salad, including citrus fruit, with whipped cream             | 2000_Fruit | 80 | 85 | -5 | 2 | 4   | B |



|          |                                                                         |            |    |    |    |   |     |   |
|----------|-------------------------------------------------------------------------|------------|----|----|----|---|-----|---|
| 63101120 | Applesauce, unsweetened                                                 | 2000_Fruit | 80 | 77 | 3  | 1 | 3.5 | B |
| 63119010 | Fig, raw                                                                | 2000_Fruit | 80 | 75 | 5  | 1 | 5   | A |
| 63402970 | Fruit salad, excluding citrus fruits, with nondairy whipped topping     | 2000_Fruit | 79 | 86 | -7 | 2 | 4   | B |
| 63103170 | Apricot, cooked or canned, juice pack                                   | 2000_Fruit | 79 | 82 | -3 | 3 | 3.5 | A |
| 62108100 | Currants, dried                                                         | 2000_Fruit | 79 | 77 | 2  | 1 | 3   | D |
| 63401030 | Apple and fruit salad with dressing                                     | 2000_Fruit | 79 | 76 | 3  | 1 | 4.5 | A |
| 63402960 | Fruit salad, excluding citrus fruits, with whipped cream                | 2000_Fruit | 77 | 82 | -5 | 2 | 4   | B |
| 61101200 | Grapefruit, canned                                                      | 2000_Fruit | 77 | 79 | -2 | 3 | 3.5 | A |
| 62110100 | Date                                                                    | 2000_Fruit | 77 | 73 | 4  | 1 | 3.5 | C |
| 63135170 | Peach, canned, juice pack                                               | 2000_Fruit | 76 | 80 | -4 | 3 | 4   | A |
| 63401010 | Apple salad with dressing                                               | 2000_Fruit | 76 | 80 | -4 | 2 | 4   | B |
| 63402990 | Fruit salad, including citrus fruits, with pudding                      | 2000_Fruit | 76 | 80 | -4 | 2 | 4   | A |
| 63403010 | Fruit salad, including citrus fruits, with salad dressing or mayonnaise | 2000_Fruit | 75 | 81 | -6 | 3 | 4   | B |
| 62101300 | Apple chips                                                             | 2000_Fruit | 75 | 80 | -5 | 3 | 3   | D |
| 63413010 | Pineapple salad with dressing                                           | 2000_Fruit | 75 | 80 | -5 | 3 | 4   | B |
| 63141150 | Pineapple, cooked or canned, drained solids                             | 2000_Fruit | 75 | 76 | -1 | 3 | 4   | B |
| 63403000 | Fruit salad, excluding citrus fruits, with pudding                      | 2000_Fruit | 74 | 77 | -3 | 2 | 4   | A |
| 61122300 | Orange, canned, NFS                                                     | 2000_Fruit | 74 | 76 | -2 | 3 | 3.5 | A |
| 63115170 | Cherries, sweet, cooked or canned, juice pack                           | 2000_Fruit | 74 | 76 | -2 | 3 | 3.5 | A |
| 63107210 | Banana, ripe, fried                                                     | 2000_Fruit | 74 | 75 | -1 | 1 | 4   | B |
| 63402045 | Fried dwarf banana, Puerto Rican style                                  | 2000_Fruit | 74 | 75 | -1 | 2 | 4   | A |
| 62114110 | Papaya, dried                                                           | 2000_Fruit | 74 | 71 | 3  | 1 | 2.5 | D |
| 63402950 | Fruit salad, excluding citrus fruits, with salad dressing or mayonnaise | 2000_Fruit | 73 | 78 | -5 | 3 | 3.5 | B |
| 63141170 | Pineapple, canned, juice pack                                           | 2000_Fruit | 73 | 77 | -4 | 3 | 3.5 | B |
| 62125100 | Raisins                                                                 | 2000_Fruit | 73 | 70 | 3  | 1 | 3   | D |
| 62120100 | Pineapple, dried                                                        | 2000_Fruit | 72 | 69 | 3  | 1 | 2.5 | D |
| 63301010 | Ambrosia                                                                | 2000_Fruit | 72 | 69 | 3  | 1 | 4   | A |
| 63129030 | Mango, canned                                                           | 2000_Fruit | 70 | 67 | 3  | 1 | 3.5 | A |
| 63412010 | Pear salad with dressing                                                | 2000_Fruit | 69 | 73 | -4 | 3 | 4   | B |
| 63148750 | Tamarind                                                                | 2000_Fruit | 69 | 65 | 4  | 1 | 4   | A |
| 62105000 | Blueberries, dried                                                      | 2000_Fruit | 68 | 76 | -8 | 3 | 3.5 | C |
| 63403040 | Fruit salad, including citrus fruits, with marshmallows                 | 2000_Fruit | 68 | 74 | -6 | 3 | 3.5 | C |
| 63201800 | Blackberries, frozen, sweetened, NS as to type of sweetener             | 2000_Fruit | 68 | 73 | -5 | 3 | 4   | C |
| 63141110 | Pineapple, canned, NFS                                                  | 2000_Fruit | 68 | 71 | -3 | 3 | 3.5 | C |
| 63137170 | Pear, canned, juice pack                                                | 2000_Fruit | 68 | 70 | -2 | 3 | 3.5 | C |
| 63143170 | Plum, cooked or canned, juice pack                                      | 2000_Fruit | 68 | 70 | -2 | 3 | 3.5 | B |
| 62101050 | Fruit mixture, dried                                                    | 2000_Fruit | 68 | 67 | 1  | 3 | 3   | D |
| 62120000 | Persimmon, dried                                                        | 2000_Fruit | 68 | 67 | 1  | 3 | 2.5 | C |

|          |                                                                                                          |            |    |    |     |   |     |   |
|----------|----------------------------------------------------------------------------------------------------------|------------|----|----|-----|---|-----|---|
| 63311120 | Fruit cocktail, cooked or canned, unsweetened, water pack                                                | 2000_Fruit | 67 | 73 | -6  | 4 | 5   | A |
| 62104200 | Apricot, dried, cooked, NS as to sweetened or unsweetened; sweetened, NS as to type of sweetener         | 2000_Fruit | 67 | 66 | 1   | 1 | 3.5 | C |
| 63402980 | Fruit salad, excluding citrus fruits, with marshmallows                                                  | 2000_Fruit | 66 | 72 | -6  | 3 | 3.5 | C |
| 63115150 | Cherries, sweet, cooked or canned, drained solids                                                        | 2000_Fruit | 66 | 67 | -1  | 3 | 3.5 | A |
| 63107110 | Banana, baked                                                                                            | 2000_Fruit | 66 | 65 | 1   | 1 | 4   | C |
| 62119200 | Pear, dried, cooked, NS as to sweetened or unsweetened; sweetened, NS as to type of sweetener            | 2000_Fruit | 65 | 62 | 3   | 1 | 3.5 | C |
| 63133100 | Papaya, canned                                                                                           | 2000_Fruit | 64 | 70 | -6  | 3 | 4   | A |
| 62116230 | Peach, dried, cooked, with sugar                                                                         | 2000_Fruit | 64 | 66 | -2  | 1 | 3.5 | C |
| 62122200 | Prune, dried, cooked, NS as to sweetened or unsweetened; sweetened, NS as to type of sweetener           | 2000_Fruit | 64 | 62 | 2   | 1 | 3   | C |
| 61122330 | Orange, canned, in syrup                                                                                 | 2000_Fruit | 63 | 65 | -2  | 3 | 3   | A |
| 62119230 | Pear, dried, cooked, with sugar                                                                          | 2000_Fruit | 63 | 61 | 2   | 1 | 3.5 | C |
| 63119110 | Fig, canned                                                                                              | 2000_Fruit | 63 | 60 | 3   | 3 | 3.5 | C |
| 63401015 | Apple and grape salad with yogurt and walnuts                                                            | 2000_Fruit | 62 | 74 | -12 | 4 | 4.5 | A |
| 62104230 | Apricot, dried, cooked, with sugar                                                                       | 2000_Fruit | 62 | 64 | -2  | 1 | 3.5 | C |
| 62126000 | Tamarind, dried                                                                                          | 2000_Fruit | 62 | 60 | 2   | 3 | 3.5 | C |
| 62122230 | Prune, dried, cooked, with sugar                                                                         | 2000_Fruit | 60 | 60 | 0   | 1 | 3   | C |
| 63219600 | Raspberries, frozen, NS as to added sweetener                                                            | 2000_Fruit | 59 | 67 | -8  | 3 | 4   | A |
| 63219620 | Raspberries, frozen, with sugar                                                                          | 2000_Fruit | 59 | 67 | -8  | 3 | 4   | A |
| 63101140 | Applesauce, stewed apples, sweetened with low calorie sweetener                                          | 2000_Fruit | 59 | 65 | -6  | 4 | 3.5 | A |
| 63103150 | Apricot, cooked or canned, drained solids                                                                | 2000_Fruit | 59 | 64 | -5  | 3 | 3.5 | B |
| 63115140 | Cherries, sweet, cooked or canned, in light syrup                                                        | 2000_Fruit | 59 | 63 | -4  | 3 | 3.5 | A |
| 63143110 | Plum, canned                                                                                             | 2000_Fruit | 59 | 59 | 0   | 3 | 3.5 | C |
| 63101330 | Apple, baked, with sugar                                                                                 | 2000_Fruit | 58 | 61 | -3  | 1 | 4   | B |
| 63125100 | Guava shell, canned in heavy syrup                                                                       | 2000_Fruit | 57 | 62 | -5  | 3 | 3.5 | C |
| 63203110 | Blubberies, canned                                                                                       | 2000_Fruit | 57 | 61 | -4  | 3 | 3   | C |
| 63119140 | Figs, cooked or canned, in light syrup                                                                   | 2000_Fruit | 57 | 57 | 0   | 3 | 3.5 | A |
| 62121100 | Plum, rock salt, dried                                                                                   | 2000_Fruit | 57 | 53 | 4   | 3 | 0.5 | E |
| 63103110 | Apricot, canned                                                                                          | 2000_Fruit | 56 | 64 | -8  | 3 | 3.5 | A |
| 63203550 | Blueberries, frozen, sweetened                                                                           | 2000_Fruit | 56 | 64 | -8  | 3 | 4   | C |
| 63135110 | Peach, canned, NFS                                                                                       | 2000_Fruit | 56 | 62 | -6  | 3 | 3.5 | B |
| 63115130 | Cherries, sweet, cooked or canned, in heavy syrup                                                        | 2000_Fruit | 56 | 57 | -1  | 3 | 3   | C |
| 63201110 | Blackberries, cooked or canned, NS as to sweetened or unsweetened; sweetened, NS as to type of sweetener | 2000_Fruit | 55 | 62 | -7  | 3 | 3.5 | C |
| 63131110 | Nectarine, cooked                                                                                        | 2000_Fruit | 55 | 60 | -5  | 2 | 4   | B |
| 63401020 | Apple and cabbage salad with dressing                                                                    | 2000_Fruit | 54 | 60 | -6  | 3 | 4.5 | A |
| 62101200 | Apple, dried, cooked, NS as to sweetened or unsweetened; sweetened, NS as to type of sweetener           | 2000_Fruit | 54 | 54 | 0   | 1 | 3.5 | C |
| 63311170 | Fruit cocktail, canned, juice pack                                                                       | 2000_Fruit | 53 | 62 | -9  | 4 | 3.5 | A |
| 63115110 | Cherries, canned                                                                                         | 2000_Fruit | 53 | 57 | -4  | 3 | 3   | C |

|          |                                                                                                              |            |    |    |     |   |     |   |
|----------|--------------------------------------------------------------------------------------------------------------|------------|----|----|-----|---|-----|---|
| 63135150 | Peach, cooked or canned, drained solids                                                                      | 2000_Fruit | 53 | 56 | -3  | 3 | 3.5 | A |
| 63137150 | Pear, cooked or canned, drained solids                                                                       | 2000_Fruit | 53 | 54 | -1  | 3 | 4   | C |
| 63147140 | Rhubarb, cooked or canned, in light syrup                                                                    | 2000_Fruit | 52 | 62 | -10 | 3 | 3.5 | B |
| 62101000 | Fruit, dried, NFS, uncooked                                                                                  | 2000_Fruit | 52 | 58 | -6  | 1 | 2.5 | C |
| 63101110 | Applesauce, regular                                                                                          | 2000_Fruit | 52 | 54 | -2  | 3 | 3.5 | C |
| 63101130 | Applesauce, stewed apples, with sugar                                                                        | 2000_Fruit | 52 | 54 | -2  | 3 | 3.5 | C |
| 63101410 | Apple rings, fried                                                                                           | 2000_Fruit | 52 | 51 | 1   | 2 | 4   | A |
| 63135140 | Peach, canned, in syrup                                                                                      | 2000_Fruit | 51 | 58 | -7  | 3 | 3.5 | A |
| 63219110 | Raspberries, cooked or canned, NS as to sweetened or unsweetened; sweetened, NS as to type of sweetener      | 2000_Fruit | 51 | 58 | -7  | 3 | 3.5 | B |
| 63219130 | Raspberries, cooked or canned, in heavy syrup                                                                | 2000_Fruit | 51 | 58 | -7  | 3 | 3.5 | B |
| 61101230 | Grapefruit, canned or frozen, in light syrup                                                                 | 2000_Fruit | 51 | 56 | -5  | 3 | 3   | A |
| 63137110 | Pear, canned, NFS                                                                                            | 2000_Fruit | 51 | 54 | -3  | 3 | 3.5 | A |
| 63103140 | Apricot, cooked or canned, in light syrup                                                                    | 2000_Fruit | 50 | 58 | -8  | 3 | 3.5 | B |
| 63141140 | Pineapple, canned, in syrup                                                                                  | 2000_Fruit | 50 | 55 | -5  | 3 | 3   | A |
| 62101230 | Apple, dried, cooked, with sugar                                                                             | 2000_Fruit | 50 | 52 | -2  | 1 | 3.5 | B |
| 63101310 | Apple, baked                                                                                                 | 2000_Fruit | 50 | 48 | 2   | 2 | 4   | B |
| 62109100 | Cranberries, dried                                                                                           | 2000_Fruit | 49 | 58 | -9  | 3 | 2.5 | C |
| 63135610 | Peach, frozen, NS as to added sweetener                                                                      | 2000_Fruit | 49 | 56 | -7  | 3 | 3.5 | C |
| 63135630 | Peach, frozen, with sugar                                                                                    | 2000_Fruit | 49 | 56 | -7  | 3 | 3.5 | C |
| 63119130 | Fig, cooked or canned, in heavy syrup                                                                        | 2000_Fruit | 49 | 52 | -3  | 3 | 3   | B |
| 62125110 | Raisins, cooked                                                                                              | 2000_Fruit | 49 | 50 | -1  | 1 | 3   | D |
| 63223600 | Strawberries, frozen, NS as to added sweetener                                                               | 2000_Fruit | 48 | 58 | -10 | 3 | 4   | C |
| 63223620 | Strawberries, frozen, with sugar                                                                             | 2000_Fruit | 48 | 58 | -10 | 3 | 4   | C |
| 63126600 | Lychee, cooked or canned, in sugar or syrup                                                                  | 2000_Fruit | 48 | 51 | -3  | 3 | 3   | C |
| 63147110 | Rhubarb                                                                                                      | 2000_Fruit | 47 | 56 | -9  | 3 | 3.5 | A |
| 62114050 | Mango, dried                                                                                                 | 2000_Fruit | 47 | 51 | -4  | 3 | 2.5 | D |
| 63137140 | Pear, canned, in syrup                                                                                       | 2000_Fruit | 46 | 50 | -4  | 3 | 3.5 | A |
| 63401990 | Banana, chocolate-covered with nuts                                                                          | 2000_Fruit | 46 | 45 | 1   | 3 | 3   | C |
| 63223110 | Strawberries, canned                                                                                         | 2000_Fruit | 45 | 55 | -10 | 3 | 4   | C |
| 63223130 | Strawberries, cooked or canned, in syrup                                                                     | 2000_Fruit | 45 | 55 | -10 | 3 | 4   | B |
| 63141130 | Pineapple, cooked or canned, in heavy syrup                                                                  | 2000_Fruit | 45 | 50 | -5  | 3 | 3   | A |
| 63203130 | Blueberries, cooked or canned, in heavy syrup                                                                | 2000_Fruit | 44 | 51 | -7  | 3 | 3   | C |
| 63401070 | Fruit, chocolate covered                                                                                     | 2000_Fruit | 44 | 49 | -5  | 3 | 3.5 | C |
| 63143140 | Plum, cooked or canned, in light syrup                                                                       | 2000_Fruit | 44 | 45 | -1  | 3 | 3   | B |
| 63103130 | Apricot, cooked or canned, in heavy syrup                                                                    | 2000_Fruit | 43 | 51 | -8  | 3 | 3   | B |
| 63107410 | Banana, fried                                                                                                | 2000_Fruit | 43 | 39 | 4   | 1 | 4   | C |
| 63411010 | Cranberry salad, congealed                                                                                   | 2000_Fruit | 42 | 59 | -17 | 4 | 3.5 | C |
| 63123110 | Grapes, seedless, cooked or canned, NS as to sweetened or unsweetened; sweetened, NS as to type of sweetener | 2000_Fruit | 42 | 46 | -4  | 3 | 3   | A |

|          |                                                                                           |                 |     |     |     |   |     |   |
|----------|-------------------------------------------------------------------------------------------|-----------------|-----|-----|-----|---|-----|---|
| 63135660 | Peach, spiced                                                                             | 2000_Fruit      | 41  | 49  | -8  | 3 | 3   | A |
| 63137130 | Pear, cooked or canned, in heavy syrup                                                    | 2000_Fruit      | 41  | 44  | -3  | 3 | 3.5 | A |
| 62106000 | Cherries, dried                                                                           | 2000_Fruit      | 40  | 48  | -8  | 3 | 2.5 | D |
| 63143150 | Plum, cooked or canned, drained solids                                                    | 2000_Fruit      | 40  | 44  | -4  | 3 | 3.5 | B |
| 63147600 | Rhubarb, frozen, NS as to sweetened or unsweetened; sweetened, NS as to type of sweetener | 2000_Fruit      | 38  | 48  | -10 | 3 | 3   | A |
| 63147620 | Rhubarb, frozen, with sugar                                                               | 2000_Fruit      | 38  | 48  | -10 | 3 | 3   | C |
| 63129020 | Mango, pickled                                                                            | 2000_Fruit      | 38  | 46  | -8  | 3 | 3   | C |
| 63135130 | Peach, cooked or canned, in heavy syrup                                                   | 2000_Fruit      | 38  | 46  | -8  | 3 | 3   | A |
| 63100110 | Fruit, pickled                                                                            | 2000_Fruit      | 38  | 37  | 1   | 3 | 2.5 | D |
| 63101420 | Apple, pickled                                                                            | 2000_Fruit      | 37  | 44  | -7  | 3 | 3.5 | C |
| 63101210 | Apple pie filling                                                                         | 2000_Fruit      | 37  | 31  | 6   | 3 | 3.5 | A |
| 63147130 | Rhubarb, cooked or canned, in heavy syrup                                                 | 2000_Fruit      | 36  | 45  | -9  | 3 | 3   | C |
| 63101150 | Applesauce, flavored                                                                      | 2000_Fruit      | 36  | 44  | -8  | 4 | 3.5 | B |
| 63311150 | Fruit cocktail, cooked or canned, drained solids                                          | 2000_Fruit      | 35  | 47  | -12 | 4 | 3.5 | A |
| 63311110 | Fruit cocktail, canned, NFS                                                               | 2000_Fruit      | 35  | 45  | -10 | 4 | 3   | A |
| 63401060 | Apple, candied                                                                            | 2000_Fruit      | 35  | 37  | -2  | 3 | 4   | C |
| 63101500 | Apple, fried                                                                              | 2000_Fruit      | 35  | 33  | 2   | 2 | 4   | C |
| 63143650 | Plum, pickled                                                                             | 2000_Fruit      | 34  | 42  | -8  | 3 | 3   | C |
| 62107200 | Banana chips                                                                              | 2000_Fruit      | 33  | 39  | -6  | 4 | 1.5 | D |
| 63311140 | Fruit cocktail, canned, in syrup                                                          | 2000_Fruit      | 32  | 42  | -10 | 4 | 3   | A |
| 63143130 | Plum, cooked or canned, in heavy syrup                                                    | 2000_Fruit      | 32  | 37  | -5  | 3 | 3   | C |
| 63311145 | Tropical fruit cocktail, cooked or canned, in light syrup                                 | 2000_Fruit      | 30  | 39  | -9  | 4 | 3.5 | A |
| 63307010 | Cranberry-orange relish, uncooked                                                         | 2000_Fruit      | 28  | 43  | -15 | 4 | 3   | C |
| 63311130 | Fruit cocktail, cooked or canned, in heavy syrup                                          | 2000_Fruit      | 25  | 37  | -12 | 4 | 3   | A |
| 63403100 | Fruit dessert with cream and/or pudding and nuts                                          | 2000_Fruit      | 19  | 25  | -6  | 3 | 2   | D |
| 63307100 | Cranberry-raspberry Sauce                                                                 | 2000_Fruit      | 17  | 30  | -13 | 4 | 3   | C |
| 63111010 | Cherries, maraschino                                                                      | 2000_Fruit      | 14  | 25  | -11 | 4 | 3   | C |
| 63207000 | Cranberries, NS as to raw, cooked, or canned                                              | 2000_Fruit      | 14  | 25  | -11 | 4 | 3.5 | C |
| 63207110 | Cranberry sauce                                                                           | 2000_Fruit      | 14  | 25  | -11 | 4 | 3   | C |
| 72101100 | Beet greens, raw                                                                          | 3000_Vegetables | 100 | 100 | 0   | 1 | 5   | A |
| 72101200 | Beet greens, cooked, NS as to fat added in cooking                                        | 3000_Vegetables | 100 | 100 | 0   | 2 | 4   | B |
| 72101210 | Beet greens, cooked, fat not added in cooking                                             | 3000_Vegetables | 100 | 100 | 0   | 1 | 4   | C |
| 72101220 | Beet greens, cooked                                                                       | 3000_Vegetables | 100 | 100 | 0   | 2 | 4   | B |
| 72101230 | Beet greens, cooked, made with oil                                                        | 3000_Vegetables | 100 | 100 | 0   | 2 | 4   | A |
| 72101250 | Beet greens, cooked, made with margarine                                                  | 3000_Vegetables | 100 | 100 | 0   | 2 | 4   | C |
| 72103000 | Broccoli raab, raw                                                                        | 3000_Vegetables | 100 | 100 | 0   | 1 | 5   | A |
| 72103020 | Broccoli raab, cooked, fat not added in cooking                                           | 3000_Vegetables | 100 | 100 | 0   | 1 | 4   | A |
| 72103030 | Broccoli raab, cooked                                                                     | 3000_Vegetables | 100 | 100 | 0   | 2 | 4.5 | A |

|          |                                                           |                 |     |     |   |   |     |   |
|----------|-----------------------------------------------------------|-----------------|-----|-----|---|---|-----|---|
| 72103040 | Broccoli raab, cooked, made with oil                      | 3000_Vegetables | 100 | 100 | 0 | 2 | 4   | A |
| 72103060 | Broccoli raab, cooked, made with margarine                | 3000_Vegetables | 100 | 100 | 0 | 2 | 4   | A |
| 72104100 | Chard, raw                                                | 3000_Vegetables | 100 | 100 | 0 | 1 | 5   | A |
| 72104200 | Chard, cooked, NS as to fat added in cooking              | 3000_Vegetables | 100 | 100 | 0 | 2 | 4   | A |
| 72104210 | Chard, cooked, fat not added in cooking                   | 3000_Vegetables | 100 | 100 | 0 | 1 | 4   | B |
| 72104220 | Chard, cooked                                             | 3000_Vegetables | 100 | 100 | 0 | 2 | 4   | B |
| 72104230 | Chard, cooked, made with oil                              | 3000_Vegetables | 100 | 100 | 0 | 2 | 4   | B |
| 72104250 | Chard, cooked, made with margarine                        | 3000_Vegetables | 100 | 100 | 0 | 2 | 4   | C |
| 72107100 | Collards, raw                                             | 3000_Vegetables | 100 | 100 | 0 | 1 | 5   | A |
| 72107210 | Collards, cooked, NS as to form, fat not added in cooking | 3000_Vegetables | 100 | 100 | 0 | 1 | 5   | A |
| 72107211 | Collards, fresh, cooked, no added fat                     | 3000_Vegetables | 100 | 100 | 0 | 1 | 5   | A |
| 72107212 | Collards, frozen, cooked, no added fat                    | 3000_Vegetables | 100 | 100 | 0 | 1 | 4   | A |
| 72107213 | Collards, canned, cooked, no added fat                    | 3000_Vegetables | 100 | 100 | 0 | 1 | 4   | A |
| 72107220 | Collards, NS as to form, cooked                           | 3000_Vegetables | 100 | 100 | 0 | 2 | 5   | A |
| 72107221 | Collards, fresh, cooked, fat added, NS as to fat type     | 3000_Vegetables | 100 | 100 | 0 | 2 | 5   | A |
| 72107222 | Collards, frozen, cooked, fat added, NS as to fat type    | 3000_Vegetables | 100 | 100 | 0 | 2 | 4   | A |
| 72107224 | Collards, cooked, NS as to form, made with oil            | 3000_Vegetables | 100 | 100 | 0 | 1 | 5   | A |
| 72107226 | Collards, cooked, NS as to form, made with margarine      | 3000_Vegetables | 100 | 100 | 0 | 2 | 5   | A |
| 72107227 | Collards, fresh, cooked with oil                          | 3000_Vegetables | 100 | 100 | 0 | 2 | 5   | A |
| 72107229 | Collards, cooked, from fresh, made with margarine         | 3000_Vegetables | 100 | 100 | 0 | 2 | 5   | A |
| 72107230 | Collards, frozen, cooked with oil                         | 3000_Vegetables | 100 | 100 | 0 | 2 | 4   | A |
| 72107232 | Collards, cooked, from frozen, made with margarine        | 3000_Vegetables | 100 | 100 | 0 | 2 | 4   | A |
| 72107233 | Collards, canned, cooked with oil                         | 3000_Vegetables | 100 | 100 | 0 | 2 | 4   | A |
| 72107235 | Collards, cooked, from canned, made with margarine        | 3000_Vegetables | 100 | 100 | 0 | 2 | 4   | A |
| 72110100 | Cress, raw                                                | 3000_Vegetables | 100 | 100 | 0 | 1 | 5   | A |
| 72110210 | Cress, cooked, NS as to form, fat not added in cooking    | 3000_Vegetables | 100 | 100 | 0 | 1 | 4   | A |
| 72110211 | Cress, cooked, from fresh, fat not added in cooking       | 3000_Vegetables | 100 | 100 | 0 | 1 | 4   | A |
| 72110213 | Cress, cooked, from canned, fat not added in cooking      | 3000_Vegetables | 100 | 100 | 0 | 1 | 4   | A |
| 72110221 | Cress, cooked                                             | 3000_Vegetables | 100 | 100 | 0 | 2 | 4,5 | A |
| 72110230 | Cress, cooked, NS as to form, made with oil               | 3000_Vegetables | 100 | 100 | 0 | 2 | 4   | A |
| 72110232 | Cress, cooked, NS as to form, made with margarine         | 3000_Vegetables | 100 | 100 | 0 | 2 | 4   | A |
| 72110233 | Cress, cooked, from fresh, made with oil                  | 3000_Vegetables | 100 | 100 | 0 | 2 | 4   | A |
| 72110236 | Cress, cooked, from canned, made with oil                 | 3000_Vegetables | 100 | 100 | 0 | 2 | 4   | A |
| 72110238 | Cress, cooked, from canned, made with margarine           | 3000_Vegetables | 100 | 100 | 0 | 2 | 4   | A |
| 72113100 | Dandelion greens, raw                                     | 3000_Vegetables | 100 | 100 | 0 | 1 | 5   | A |
| 72113210 | Dandelion greens, cooked, fat not added in cooking        | 3000_Vegetables | 100 | 100 | 0 | 1 | 4,5 | A |
| 72113220 | Dandelion greens, cooked                                  | 3000_Vegetables | 100 | 100 | 0 | 1 | 4,5 | A |
| 72113230 | Dandelion greens, cooked, made with oil                   | 3000_Vegetables | 100 | 100 | 0 | 2 | 4,5 | A |
| 72113250 | Dandelion greens, cooked, made with margarine             | 3000_Vegetables | 100 | 100 | 0 | 2 | 4,5 | A |

|          |                                                         |                 |     |     |   |   |     |   |
|----------|---------------------------------------------------------|-----------------|-----|-----|---|---|-----|---|
| 72116000 | Romaine lettuce, raw                                    | 3000_Vegetables | 100 | 100 | 0 | 1 | 5   | A |
| 72116200 | Escarole, cooked, NS as to fat added in cooking         | 3000_Vegetables | 100 | 100 | 0 | 2 | 4.5 | A |
| 72116210 | Escarole, cooked, fat not added in cooking              | 3000_Vegetables | 100 | 100 | 0 | 1 | 4.5 | A |
| 72116220 | Escarole, cooked                                        | 3000_Vegetables | 100 | 100 | 0 | 2 | 4.5 | A |
| 72118210 | Greens, cooked, NS as to form, fat not added in cooking | 3000_Vegetables | 100 | 100 | 0 | 1 | 4   | A |
| 72118211 | Greens, fresh, cooked, no added fat                     | 3000_Vegetables | 100 | 100 | 0 | 1 | 4.5 | A |
| 72118212 | Greens, frozen, cooked, no added fat                    | 3000_Vegetables | 100 | 100 | 0 | 1 | 4.5 | A |
| 72118213 | Greens, canned, cooked, no added fat                    | 3000_Vegetables | 100 | 100 | 0 | 1 | 4   | A |
| 72118220 | Greens, NS as to form, cooked                           | 3000_Vegetables | 100 | 100 | 0 | 2 | 4.5 | A |
| 72118221 | Greens, fresh, cooked, fat added                        | 3000_Vegetables | 100 | 100 | 0 | 2 | 4.5 | A |
| 72118222 | Greens, frozen, cooked, fat added                       | 3000_Vegetables | 100 | 100 | 0 | 2 | 4.5 | A |
| 72118223 | Greens, canned, cooked, fat added                       | 3000_Vegetables | 100 | 100 | 0 | 2 | 4   | B |
| 72118224 | Greens, cooked, NS as to form, made with oil            | 3000_Vegetables | 100 | 100 | 0 | 2 | 4.5 | A |
| 72118226 | Greens, cooked, NS as to form, made with margarine      | 3000_Vegetables | 100 | 100 | 0 | 2 | 4   | A |
| 72118227 | Greens, cooked, from fresh, made with oil               | 3000_Vegetables | 100 | 100 | 0 | 2 | 4.5 | A |
| 72118229 | Greens, cooked, from fresh, made with margarine         | 3000_Vegetables | 100 | 100 | 0 | 2 | 4   | A |
| 72118230 | Greens, cooked, from frozen, made with oil              | 3000_Vegetables | 100 | 100 | 0 | 2 | 4   | A |
| 72118232 | Greens, cooked, from frozen, made with margarine        | 3000_Vegetables | 100 | 100 | 0 | 2 | 4.5 | A |
| 72118233 | Greens, cooked, from canned, made with oil              | 3000_Vegetables | 100 | 100 | 0 | 2 | 4.5 | A |
| 72118235 | Greens, cooked, from canned, made with margarine        | 3000_Vegetables | 100 | 100 | 0 | 2 | 4   | A |
| 72118300 | Chamnamul, cooked, NS as to fat added in cooking        | 3000_Vegetables | 100 | 100 | 0 | 2 | 4   | B |
| 72118305 | Chamnamul, cooked, fat not added in cooking             | 3000_Vegetables | 100 | 100 | 0 | 1 | 4   | A |
| 72119190 | Kale, raw                                               | 3000_Vegetables | 100 | 100 | 0 | 1 | 5   | A |
| 72119210 | Kale, cooked, NS as to form, fat not added in cooking   | 3000_Vegetables | 100 | 100 | 0 | 1 | 4.5 | B |
| 72119211 | Kale, fresh, cooked, no added fat                       | 3000_Vegetables | 100 | 100 | 0 | 1 | 5   | A |
| 72119212 | Kale, frozen, cooked, no added fat                      | 3000_Vegetables | 100 | 100 | 0 | 1 | 4   | A |
| 72119213 | Kale, canned, cooked, no added fat                      | 3000_Vegetables | 100 | 100 | 0 | 1 | 4   | B |
| 72119220 | Kale, NS as to form, cooked                             | 3000_Vegetables | 100 | 100 | 0 | 2 | 5   | A |
| 72119221 | Kale, fresh, cooked, fat added                          | 3000_Vegetables | 100 | 100 | 0 | 2 | 5   | A |
| 72119222 | Kale, frozen, cooked, fat added                         | 3000_Vegetables | 100 | 100 | 0 | 2 | 4   | A |
| 72119223 | Kale, canned, cooked, fat added                         | 3000_Vegetables | 100 | 100 | 0 | 2 | 4   | A |
| 72119224 | Kale, cooked, NS as to form, made with oil              | 3000_Vegetables | 100 | 100 | 0 | 2 | 4.5 | A |
| 72119226 | Kale, cooked, NS as to form, made with margarine        | 3000_Vegetables | 100 | 100 | 0 | 2 | 4.5 | A |
| 72119227 | Kale, cooked, from fresh, made with oil                 | 3000_Vegetables | 100 | 100 | 0 | 2 | 4.5 | A |
| 72119230 | Kale, cooked, from frozen, made with oil                | 3000_Vegetables | 100 | 100 | 0 | 2 | 4   | A |
| 72119233 | Kale, cooked, from canned, made with oil                | 3000_Vegetables | 100 | 100 | 0 | 2 | 4   | A |
| 72120210 | Lambsquarter, cooked, fat not added in cooking          | 3000_Vegetables | 100 | 100 | 0 | 1 | 4   | A |
| 72120220 | Lambsquarter, cooked                                    | 3000_Vegetables | 100 | 100 | 0 | 2 | 4   | A |
| 72120230 | Lambsquarter, cooked, made with oil                     | 3000_Vegetables | 100 | 100 | 0 | 1 | 4   | A |

|          |                                                                 |                 |     |     |   |   |     |   |
|----------|-----------------------------------------------------------------|-----------------|-----|-----|---|---|-----|---|
| 72121210 | Mustard cabbage, cooked, fat not added in cooking               | 3000_Vegetables | 100 | 100 | 0 | 1 | 4   | A |
| 72121211 | Mustard cabbage, cooked                                         | 3000_Vegetables | 100 | 100 | 0 | 2 | 4   | A |
| 72122100 | Mustard greens, raw                                             | 3000_Vegetables | 100 | 100 | 0 | 1 | 5   | A |
| 72122210 | Mustard greens, cooked, NS as to form, fat not added in cooking | 3000_Vegetables | 100 | 100 | 0 | 1 | 4   | A |
| 72122211 | Mustard greens, fresh, cooked, no added fat                     | 3000_Vegetables | 100 | 100 | 0 | 1 | 4.5 | A |
| 72122212 | Mustard greens, frozen, cooked, no added fat                    | 3000_Vegetables | 100 | 100 | 0 | 1 | 4.5 | A |
| 72122213 | Mustard greens, canned, cooked, no added fat                    | 3000_Vegetables | 100 | 100 | 0 | 1 | 4   | A |
| 72122220 | Mustard greens, NS as to form, cooked                           | 3000_Vegetables | 100 | 100 | 0 | 2 | 4.5 | A |
| 72122221 | Mustard greens, fresh, cooked, fat added                        | 3000_Vegetables | 100 | 100 | 0 | 2 | 4.5 | A |
| 72122222 | Mustard greens, frozen, cooked, fat added                       | 3000_Vegetables | 100 | 100 | 0 | 2 | 4.5 | A |
| 72122223 | Mustard greens, canned, cooked, fat added                       | 3000_Vegetables | 100 | 100 | 0 | 2 | 4   | A |
| 72122224 | Mustard greens, cooked, NS as to form, made with oil            | 3000_Vegetables | 100 | 100 | 0 | 2 | 4   | A |
| 72122226 | Mustard greens, cooked, NS as to form, made with margarine      | 3000_Vegetables | 100 | 100 | 0 | 2 | 4   | A |
| 72122227 | Mustard greens, cooked, from fresh, made with oil               | 3000_Vegetables | 100 | 100 | 0 | 2 | 4   | A |
| 72122229 | Mustard greens, cooked, from fresh, made with margarine         | 3000_Vegetables | 100 | 100 | 0 | 2 | 4   | A |
| 72122230 | Mustard greens, cooked, from frozen, made with oil              | 3000_Vegetables | 100 | 100 | 0 | 2 | 4   | A |
| 72122232 | Mustard greens, cooked, from frozen, made with margarine        | 3000_Vegetables | 100 | 100 | 0 | 2 | 4   | B |
| 72122233 | Mustard greens, cooked, from canned, made with oil              | 3000_Vegetables | 100 | 100 | 0 | 2 | 4   | A |
| 72122235 | Mustard greens, cooked, from canned, made with margarine        | 3000_Vegetables | 100 | 100 | 0 | 2 | 4   | A |
| 72123010 | Poke greens, cooked, fat not added in cooking                   | 3000_Vegetables | 100 | 100 | 0 | 1 | 4   | A |
| 72123020 | Poke greens, cooked                                             | 3000_Vegetables | 100 | 100 | 0 | 2 | 4   | A |
| 72123030 | Poke greens, cooked, made with oil                              | 3000_Vegetables | 100 | 100 | 0 | 2 | 4   | A |
| 72123050 | Poke greens, cooked, made with margarine                        | 3000_Vegetables | 100 | 100 | 0 | 2 | 4   | B |
| 72124100 | Radicchio, raw                                                  | 3000_Vegetables | 100 | 100 | 0 | 1 | 5   | A |
| 72125100 | Spinach, raw                                                    | 3000_Vegetables | 100 | 100 | 0 | 1 | 5   | A |
| 72125200 | Spinach, cooked, NS as to form, NS as to fat added in cooking   | 3000_Vegetables | 100 | 100 | 0 | 2 | 4   | A |
| 72125201 | Spinach, cooked, from fresh, NS as to fat added in cooking      | 3000_Vegetables | 100 | 100 | 0 | 2 | 4   | A |
| 72125202 | Spinach, cooked, from frozen, NS as to fat added in cooking     | 3000_Vegetables | 100 | 100 | 0 | 2 | 4   | A |
| 72125203 | Spinach, cooked, from canned, NS as to fat added in cooking     | 3000_Vegetables | 100 | 100 | 0 | 3 | 4   | B |
| 72125211 | Spinach, fresh, cooked, no added fat                            | 3000_Vegetables | 100 | 100 | 0 | 1 | 4.5 | A |
| 72125212 | Spinach, frozen, cooked, no added fat                           | 3000_Vegetables | 100 | 100 | 0 | 1 | 4.5 | A |
| 72125213 | Spinach, canned, cooked, no added fat                           | 3000_Vegetables | 100 | 100 | 0 | 3 | 4   | A |
| 72125216 | Spinach, cooked, NS as to form, made with margarine             | 3000_Vegetables | 100 | 100 | 0 | 2 | 4.5 | A |
| 72125217 | Spinach, fresh, cooked with oil                                 | 3000_Vegetables | 100 | 100 | 0 | 2 | 4.5 | A |
| 72125218 | Spinach, fresh, cooked with butter or margarine                 | 3000_Vegetables | 100 | 100 | 0 | 2 | 4   | A |
| 72125219 | Spinach, cooked, from fresh, made with margarine                | 3000_Vegetables | 100 | 100 | 0 | 2 | 4   | A |
| 72125220 | Spinach, NS as to form, cooked                                  | 3000_Vegetables | 100 | 100 | 0 | 2 | 4.5 | A |
| 72125221 | Spinach, fresh, cooked, fat added, NS as to fat type            | 3000_Vegetables | 100 | 100 | 0 | 2 | 4.5 | A |
| 72125222 | Spinach, frozen, cooked, fat added, NS as to fat type           | 3000_Vegetables | 100 | 100 | 0 | 2 | 4.5 | A |

|          |                                                                                                          |                 |     |     |   |   |     |   |
|----------|----------------------------------------------------------------------------------------------------------|-----------------|-----|-----|---|---|-----|---|
| 72125223 | Spinach, canned, cooked, fat added, NS as to fat type                                                    | 3000_Vegetables | 100 | 100 | 0 | 3 | 4   | A |
| 72125224 | Spinach, frozen, cooked with oil                                                                         | 3000_Vegetables | 100 | 100 | 0 | 2 | 4.5 | A |
| 72125227 | Spinach, canned, cooked with oil                                                                         | 3000_Vegetables | 100 | 100 | 0 | 3 | 4   | A |
| 72126000 | Taro leaves, cooked, fat not added in cooking                                                            | 3000_Vegetables | 100 | 100 | 0 | 1 | 4.5 | A |
| 72126001 | Taro leaves, cooked                                                                                      | 3000_Vegetables | 100 | 100 | 0 | 2 | 5   | A |
| 72127000 | Thistle leaves, cooked, fat not added in cooking                                                         | 3000_Vegetables | 100 | 100 | 0 | 1 | 4   | A |
| 72127001 | Thistle leaves, cooked                                                                                   | 3000_Vegetables | 100 | 100 | 0 | 2 | 4   | A |
| 72128210 | Turnip greens, cooked, NS as to form, fat not added in cooking                                           | 3000_Vegetables | 100 | 100 | 0 | 1 | 4.5 | A |
| 72128211 | Turnip greens, fresh, cooked, no added fat                                                               | 3000_Vegetables | 100 | 100 | 0 | 1 | 4.5 | A |
| 72128212 | Turnip greens, frozen, cooked, no added fat                                                              | 3000_Vegetables | 100 | 100 | 0 | 1 | 4.5 | A |
| 72128213 | Turnip greens, canned, cooked, no added fat                                                              | 3000_Vegetables | 100 | 100 | 0 | 1 | 4   | A |
| 72128220 | Turnip greens, NS as to form, cooked                                                                     | 3000_Vegetables | 100 | 100 | 0 | 2 | 4.5 | A |
| 72128221 | Turnip greens, fresh, cooked, fat added                                                                  | 3000_Vegetables | 100 | 100 | 0 | 2 | 4.5 | A |
| 72128222 | Turnip greens, frozen, cooked, fat added                                                                 | 3000_Vegetables | 100 | 100 | 0 | 2 | 4.5 | A |
| 72128226 | Turnip greens, cooked, NS as to form, made with margarine                                                | 3000_Vegetables | 100 | 100 | 0 | 2 | 4.5 | A |
| 72128227 | Turnip greens, cooked, from fresh, made with oil                                                         | 3000_Vegetables | 100 | 100 | 0 | 2 | 4   | A |
| 72128229 | Turnip greens, cooked, from fresh, made with margarine                                                   | 3000_Vegetables | 100 | 100 | 0 | 2 | 4   | A |
| 72128230 | Turnip greens, cooked, from frozen, made with oil                                                        | 3000_Vegetables | 100 | 100 | 0 | 2 | 4.5 | A |
| 72128232 | Turnip greens, cooked, from frozen, made with margarine                                                  | 3000_Vegetables | 100 | 100 | 0 | 2 | 4.5 | A |
| 72128233 | Turnip greens, cooked, from canned, made with oil                                                        | 3000_Vegetables | 100 | 100 | 0 | 2 | 4   | B |
| 72128235 | Turnip greens, cooked, from canned, made with margarine                                                  | 3000_Vegetables | 100 | 100 | 0 | 2 | 4   | A |
| 72128236 | Turnip greens, canned, reduced sodium, cooked, NS as to fat added in cooking                             | 3000_Vegetables | 100 | 100 | 0 | 2 | 4   | A |
| 72128237 | Turnip greens, canned, reduced sodium, cooked, no added fat                                              | 3000_Vegetables | 100 | 100 | 0 | 1 | 4   | A |
| 72128238 | Turnip greens, canned, reduced sodium, cooked, fat added                                                 | 3000_Vegetables | 100 | 100 | 0 | 2 | 4   | A |
| 72128410 | Turnip greens with roots, cooked, NS as to form, fat not added in cooking                                | 3000_Vegetables | 100 | 100 | 0 | 1 | 4.5 | A |
| 72128411 | Turnip greens with roots, cooked, from fresh, fat not added in cooking                                   | 3000_Vegetables | 100 | 100 | 0 | 1 | 4   | A |
| 72128412 | Turnip greens with roots, cooked, from frozen, fat not added in cooking                                  | 3000_Vegetables | 100 | 100 | 0 | 1 | 4.5 | A |
| 72128413 | Turnip greens with roots, cooked, from canned, fat not added in cooking                                  | 3000_Vegetables | 100 | 100 | 0 | 1 | 4   | A |
| 72128500 | Turnip greens, canned, low sodium, cooked, NS as to fat added in cooking                                 | 3000_Vegetables | 100 | 100 | 0 | 2 | 4   | A |
| 72128510 | Turnip greens, canned, low sodium, cooked, fat not added in cooking                                      | 3000_Vegetables | 100 | 100 | 0 | 1 | 4   | A |
| 72128520 | Turnip greens, canned, low sodium, cooked, fat added in cooking                                          | 3000_Vegetables | 100 | 100 | 0 | 2 | 4   | A |
| 72130100 | Watercress, raw                                                                                          | 3000_Vegetables | 100 | 100 | 0 | 1 | 5   | A |
| 72130200 | Watercress, cooked, fat not added in cooking                                                             | 3000_Vegetables | 100 | 100 | 0 | 1 | 4   | A |
| 72130201 | Watercress, cooked                                                                                       | 3000_Vegetables | 100 | 100 | 0 | 2 | 4.5 | A |
| 72132200 | Bitter melon leaves, horseradish leaves, jute leaves, or radish leaves, cooked, fat not added in cooking | 3000_Vegetables | 100 | 100 | 0 | 1 | 4   | B |



|          |                                                                                                                                           |                 |     |     |   |   |     |   |
|----------|-------------------------------------------------------------------------------------------------------------------------------------------|-----------------|-----|-----|---|---|-----|---|
| 72132201 | Bitter melon, horseradish, jute, or radish leaves, cooked                                                                                 | 3000_Vegetables | 100 | 100 | 0 | 2 | 4.5 | A |
| 72133200 | Sweet potato leaves, squash leaves, pumpkin leaves, chrysanthemum leaves, bean leaves, or swamp cabbage, cooked, fat not added in cooking | 3000_Vegetables | 100 | 100 | 0 | 1 | 4   | C |
| 72133201 | Sweet potato, squash, pumpkin, chrysanthemum, or bean leaves, cooked                                                                      | 3000_Vegetables | 100 | 100 | 0 | 2 | 4.5 | A |
| 72201100 | Broccoli, raw                                                                                                                             | 3000_Vegetables | 100 | 100 | 0 | 1 | 5   | A |
| 72201210 | Broccoli, cooked, NS as to form, fat not added in cooking                                                                                 | 3000_Vegetables | 100 | 100 | 0 | 1 | 4.5 | A |
| 72201211 | Broccoli, fresh, cooked, no added fat                                                                                                     | 3000_Vegetables | 100 | 100 | 0 | 1 | 4.5 | A |
| 72201212 | Broccoli, frozen, cooked, no added fat                                                                                                    | 3000_Vegetables | 100 | 100 | 0 | 1 | 4.5 | A |
| 72203000 | Broccoli, chinese, raw                                                                                                                    | 3000_Vegetables | 100 | 100 | 0 | 1 | 5   | A |
| 72203040 | Broccoli, chinese, cooked, NS as to form, fat not added in cooking                                                                        | 3000_Vegetables | 100 | 100 | 0 | 1 | 4   | A |
| 72203050 | Broccoli, chinese cooked, from fresh, fat not added in cooking                                                                            | 3000_Vegetables | 100 | 100 | 0 | 1 | 4   | A |
| 72203060 | Broccoli, chinese, cooked, from frozen, fat not added in cooking                                                                          | 3000_Vegetables | 100 | 100 | 0 | 1 | 4   | A |
| 72203070 | Broccoli, Chinese, cooked                                                                                                                 | 3000_Vegetables | 100 | 100 | 0 | 2 | 4.5 | A |
| 73103010 | Carrots, canned, reduced sodium, cooked, no added fat                                                                                     | 3000_Vegetables | 100 | 100 | 0 | 1 | 4   | A |
| 73103021 | Carrots, canned, reduced sodium, cooked with oil                                                                                          | 3000_Vegetables | 100 | 100 | 0 | 2 | 4   | A |
| 73111250 | Peas and carrots, canned, low sodium, NS as to fat added in cooking                                                                       | 3000_Vegetables | 100 | 100 | 0 | 2 | 5   | A |
| 73111260 | Peas and carrots, canned, low sodium, fat added in cooking                                                                                | 3000_Vegetables | 100 | 100 | 0 | 2 | 5   | A |
| 73111270 | Peas and carrots, canned, low sodium, fat not added in cooking                                                                            | 3000_Vegetables | 100 | 100 | 0 | 1 | 5   | A |
| 73302010 | Winter squash, raw                                                                                                                        | 3000_Vegetables | 100 | 100 | 0 | 1 | 5   | A |
| 74101000 | Tomatoes, raw                                                                                                                             | 3000_Vegetables | 100 | 100 | 0 | 1 | 5   | A |
| 74102000 | Tomatoes, green, raw                                                                                                                      | 3000_Vegetables | 100 | 100 | 0 | 1 | 5   | A |
| 74202010 | Tomatoes, NS as to form, broiled                                                                                                          | 3000_Vegetables | 100 | 100 | 0 | 1 | 3.5 | B |
| 74202011 | Tomatoes, from fresh, broiled                                                                                                             | 3000_Vegetables | 100 | 100 | 0 | 1 | 3.5 | B |
| 74206000 | Sun-dried tomatoes                                                                                                                        | 3000_Vegetables | 100 | 100 | 0 | 1 | 5   | C |
| 74403110 | Tomato paste                                                                                                                              | 3000_Vegetables | 100 | 100 | 0 | 1 | 5   | A |
| 74403120 | Tomato puree                                                                                                                              | 3000_Vegetables | 100 | 100 | 0 | 1 | 4.5 | A |
| 74504010 | Tomato and okra, cooked, fat not added in cooking                                                                                         | 3000_Vegetables | 100 | 100 | 0 | 2 | 4   | B |
| 74504021 | Tomato and okra, cooked, made with oil                                                                                                    | 3000_Vegetables | 100 | 100 | 0 | 2 | 4   | B |
| 74504150 | Tomato and celery, cooked, fat not added in cooking                                                                                       | 3000_Vegetables | 100 | 100 | 0 | 1 | 3.5 | A |
| 75100250 | Raw vegetable, NFS                                                                                                                        | 3000_Vegetables | 100 | 100 | 0 | 1 | 4.5 | A |
| 75100300 | Sprouts, NFS                                                                                                                              | 3000_Vegetables | 100 | 100 | 0 | 1 | 4.5 | A |
| 75100500 | Alfalfa sprouts, raw                                                                                                                      | 3000_Vegetables | 100 | 100 | 0 | 1 | 5   | A |
| 75100800 | Asparagus, raw                                                                                                                            | 3000_Vegetables | 100 | 100 | 0 | 1 | 5   | A |
| 75101000 | Bean sprouts, raw                                                                                                                         | 3000_Vegetables | 100 | 100 | 0 | 1 | 5   | A |
| 75101800 | Green beans, raw                                                                                                                          | 3000_Vegetables | 100 | 100 | 0 | 1 | 5   | A |
| 75102600 | Broccoli, raw                                                                                                                             | 3000_Vegetables | 100 | 100 | 0 | 1 | 5   | A |
| 75102750 | Brussels sprouts, raw                                                                                                                     | 3000_Vegetables | 100 | 100 | 0 | 1 | 5   | A |
| 75103000 | Cabbage, green, raw                                                                                                                       | 3000_Vegetables | 100 | 100 | 0 | 1 | 5   | A |

|          |                                                                                                    |                 |     |     |   |   |     |   |
|----------|----------------------------------------------------------------------------------------------------|-----------------|-----|-----|---|---|-----|---|
| 75104000 | Cabbage, Chinese, raw                                                                              | 3000_Vegetables | 100 | 100 | 0 | 1 | 5   | A |
| 75105000 | Cabbage, red, raw                                                                                  | 3000_Vegetables | 100 | 100 | 0 | 1 | 5   | A |
| 75105500 | Cactus, raw                                                                                        | 3000_Vegetables | 100 | 100 | 0 | 1 | 5   | A |
| 75107000 | Cauliflower, raw                                                                                   | 3000_Vegetables | 100 | 100 | 0 | 1 | 5   | A |
| 75109000 | Celery, raw                                                                                        | 3000_Vegetables | 100 | 100 | 0 | 1 | 5   | A |
| 75109010 | Fennel bulb, raw                                                                                   | 3000_Vegetables | 100 | 100 | 0 | 1 | 5   | A |
| 75111000 | Cucumber, raw                                                                                      | 3000_Vegetables | 100 | 100 | 0 | 1 | 5   | A |
| 75111200 | Eggplant, raw                                                                                      | 3000_Vegetables | 100 | 100 | 0 | 1 | 5   | A |
| 75112000 | Kohlrabi, raw                                                                                      | 3000_Vegetables | 100 | 100 | 0 | 1 | 5   | A |
| 75113000 | Lettuce, raw                                                                                       | 3000_Vegetables | 100 | 100 | 0 | 1 | 5   | A |
| 75113060 | Lettuce, Boston, raw                                                                               | 3000_Vegetables | 100 | 100 | 0 | 1 | 5   | A |
| 75113070 | Lettuce, manoa                                                                                     | 3000_Vegetables | 100 | 100 | 0 | 1 | 4,5 | A |
| 75113080 | Lettuce, arugula, raw                                                                              | 3000_Vegetables | 100 | 100 | 0 | 1 | 5   | A |
| 75114000 | Mixed salad greens, raw                                                                            | 3000_Vegetables | 100 | 100 | 0 | 1 | 5   | A |
| 75115000 | Mushrooms, raw                                                                                     | 3000_Vegetables | 100 | 100 | 0 | 1 | 5   | A |
| 75117010 | Onions, green, raw                                                                                 | 3000_Vegetables | 100 | 100 | 0 | 1 | 5   | A |
| 75120000 | Green peas, raw                                                                                    | 3000_Vegetables | 100 | 100 | 0 | 1 | 5   | A |
| 75121400 | Pepper, poblano, raw                                                                               | 3000_Vegetables | 100 | 100 | 0 | 1 | 5   | A |
| 75121500 | Pepper, Serrano, raw                                                                               | 3000_Vegetables | 100 | 100 | 0 | 1 | 5   | A |
| 75122000 | Pepper, raw, NFS                                                                                   | 3000_Vegetables | 100 | 100 | 0 | 1 | 5   | A |
| 75122100 | Pepper, sweet, green, raw                                                                          | 3000_Vegetables | 100 | 100 | 0 | 1 | 5   | A |
| 75122200 | Pepper, sweet, red, raw                                                                            | 3000_Vegetables | 100 | 100 | 0 | 1 | 5   | A |
| 75124000 | Pepper, banana, raw                                                                                | 3000_Vegetables | 100 | 100 | 0 | 1 | 5   | A |
| 75125000 | Radish, raw                                                                                        | 3000_Vegetables | 100 | 100 | 0 | 1 | 5   | A |
| 75127000 | Rutabaga, raw                                                                                      | 3000_Vegetables | 100 | 100 | 0 | 1 | 5   | A |
| 75127750 | Snowpeas, raw                                                                                      | 3000_Vegetables | 100 | 100 | 0 | 1 | 5   | A |
| 75128000 | Summer squash, yellow, raw                                                                         | 3000_Vegetables | 100 | 100 | 0 | 1 | 5   | A |
| 75128010 | Summer squash, green, raw                                                                          | 3000_Vegetables | 100 | 100 | 0 | 1 | 5   | A |
| 75143000 | Lettuce, salad with assorted vegetables including tomatoes and/or carrots, no dressing             | 3000_Vegetables | 100 | 100 | 0 | 1 | 4,5 | A |
| 75143050 | Lettuce, salad with assorted vegetables excluding tomatoes and carrots, no dressing                | 3000_Vegetables | 100 | 100 | 0 | 1 | 4,5 | A |
| 75143100 | Lettuce, salad with avocado, tomato, and/or carrots, with or without other vegetables, no dressing | 3000_Vegetables | 100 | 100 | 0 | 1 | 4,5 | A |
| 75202010 | Asparagus, cooked, NS as to form, fat not added in cooking                                         | 3000_Vegetables | 100 | 100 | 0 | 1 | 4   | A |
| 75202011 | Asparagus, fresh, cooked, no added fat                                                             | 3000_Vegetables | 100 | 100 | 0 | 1 | 4   | A |
| 75202012 | Asparagus, frozen, cooked, no added fat                                                            | 3000_Vegetables | 100 | 100 | 0 | 1 | 4   | A |
| 75202013 | Asparagus, canned, cooked, no added fat                                                            | 3000_Vegetables | 100 | 100 | 0 | 3 | 4   | B |
| 75202021 | Asparagus, fresh, cooked, fat added, NS as to fat type                                             | 3000_Vegetables | 100 | 100 | 0 | 2 | 4   | A |
| 75202022 | Asparagus, frozen, cooked, fat added, NS as to fat type                                            | 3000_Vegetables | 100 | 100 | 0 | 2 | 4   | A |
| 75202024 | Asparagus, cooked, NS as to form, made with oil                                                    | 3000_Vegetables | 100 | 100 | 0 | 2 | 4   | A |

|          |                                                                            |                 |     |     |   |   |     |   |
|----------|----------------------------------------------------------------------------|-----------------|-----|-----|---|---|-----|---|
| 75202027 | Asparagus, fresh, cooked with oil                                          | 3000_Vegetables | 100 | 100 | 0 | 2 | 4   | A |
| 75205021 | Green beans, fresh, cooked, no added fat                                   | 3000_Vegetables | 100 | 100 | 0 | 1 | 4.5 | A |
| 75205120 | Green beans, canned, reduced sodium, cooked, no added fat                  | 3000_Vegetables | 100 | 100 | 0 | 1 | 4.5 | A |
| 75208300 | Bitter melon, cooked, fat not added in cooking                             | 3000_Vegetables | 100 | 100 | 0 | 1 | 4   | A |
| 75208710 | Broccoflower, cooked, fat not added in cooking                             | 3000_Vegetables | 100 | 100 | 0 | 1 | 4.5 | A |
| 75209010 | Brussels sprouts, cooked, NS as to form, fat not added in cooking          | 3000_Vegetables | 100 | 100 | 0 | 1 | 4.5 | A |
| 75209011 | Brussels sprouts, fresh, cooked, no added fat                              | 3000_Vegetables | 100 | 100 | 0 | 1 | 4.5 | A |
| 75209012 | Brussels sprouts, frozen, cooked, no added fat                             | 3000_Vegetables | 100 | 100 | 0 | 1 | 4.5 | A |
| 75210000 | Cabbage, Chinese, cooked, NS as to fat added in cooking                    | 3000_Vegetables | 100 | 100 | 0 | 2 | 4   | A |
| 75210010 | Cabbage, Chinese, cooked, no added fat                                     | 3000_Vegetables | 100 | 100 | 0 | 1 | 4   | A |
| 75210021 | Cabbage, Chinese, cooked, made with oil                                    | 3000_Vegetables | 100 | 100 | 0 | 2 | 4   | A |
| 75213010 | Cabbage, savoy, cooked, fat not added in cooking                           | 3000_Vegetables | 100 | 100 | 0 | 1 | 4.5 | A |
| 75213110 | Cactus, cooked, no added fat                                               | 3000_Vegetables | 100 | 100 | 0 | 1 | 4   | A |
| 75214010 | Cauliflower, cooked, NS as to form, fat not added in cooking               | 3000_Vegetables | 100 | 100 | 0 | 1 | 4.5 | A |
| 75214012 | Cauliflower, frozen, cooked, no added fat                                  | 3000_Vegetables | 100 | 100 | 0 | 1 | 4.5 | A |
| 75214013 | Cauliflower, cooked, from canned, fat not added in cooking                 | 3000_Vegetables | 100 | 100 | 0 | 1 | 4   | A |
| 75214030 | Cauliflower, frozen, cooked with oil                                       | 3000_Vegetables | 100 | 100 | 0 | 2 | 4.5 | A |
| 75215010 | Celery, cooked, fat not added in cooking                                   | 3000_Vegetables | 100 | 100 | 0 | 1 | 4   | A |
| 75217010 | Eggplant, cooked, no added fat                                             | 3000_Vegetables | 100 | 100 | 0 | 1 | 4.5 | A |
| 75217300 | Flowers or blossoms of sesbania, squash, or lily, fat not added in cooking | 3000_Vegetables | 100 | 100 | 0 | 1 | 4   | A |
| 75219010 | Mushrooms, cooked, NS as to form, fat not added in cooking                 | 3000_Vegetables | 100 | 100 | 0 | 1 | 4   | B |
| 75219011 | Mushrooms, fresh, cooked, no added fat                                     | 3000_Vegetables | 100 | 100 | 0 | 1 | 4.5 | A |
| 75219012 | Mushrooms, cooked, from frozen, fat not added in cooking                   | 3000_Vegetables | 100 | 100 | 0 | 1 | 4   | B |
| 75219033 | Mushrooms, fresh, cooked with oil                                          | 3000_Vegetables | 100 | 100 | 0 | 2 | 4.5 | A |
| 75220010 | Okra, cooked, NS as to form, fat not added in cooking                      | 3000_Vegetables | 100 | 100 | 0 | 1 | 4   | B |
| 75220011 | Okra, fresh, cooked, no added fat                                          | 3000_Vegetables | 100 | 100 | 0 | 1 | 4.5 | A |
| 75220012 | Okra, frozen, cooked, no added fat                                         | 3000_Vegetables | 100 | 100 | 0 | 1 | 4   | A |
| 75220013 | Okra, cooked, from canned, fat not added in cooking                        | 3000_Vegetables | 100 | 100 | 0 | 3 | 4   | B |
| 75220020 | Okra, NS as to form, cooked                                                | 3000_Vegetables | 100 | 100 | 0 | 2 | 4   | A |
| 75220021 | Okra, fresh, cooked, fat added                                             | 3000_Vegetables | 100 | 100 | 0 | 2 | 4.5 | A |
| 75220027 | Okra, cooked, from fresh, made with oil                                    | 3000_Vegetables | 100 | 100 | 0 | 2 | 4   | B |
| 75220050 | Lettuce, cooked, fat not added in cooking                                  | 3000_Vegetables | 100 | 100 | 0 | 1 | 4.5 | A |
| 75220100 | Luffa, cooked, fat not added in cooking                                    | 3000_Vegetables | 100 | 100 | 0 | 1 | 4   | A |
| 75220101 | Luffa, cooked                                                              | 3000_Vegetables | 100 | 100 | 0 | 2 | 4.5 | A |
| 75227100 | Radish, daikon, cooked, fat not added in cooking                           | 3000_Vegetables | 100 | 100 | 0 | 1 | 4   | B |
| 75230010 | Sauerkraut, cooked, fat not added in cooking                               | 3000_Vegetables | 100 | 100 | 0 | 3 | 3.5 | C |
| 75230100 | Sauerkraut, canned, low sodium                                             | 3000_Vegetables | 100 | 100 | 0 | 3 | 4   | A |
| 75232100 | Seaweed, cooked, NS as to fat added in cooking                             | 3000_Vegetables | 100 | 100 | 0 | 2 | 4.5 | A |

|          |                                                                                                                         |                 |     |     |   |   |     |   |
|----------|-------------------------------------------------------------------------------------------------------------------------|-----------------|-----|-----|---|---|-----|---|
| 75232110 | Seaweed, cooked, no added fat                                                                                           | 3000_Vegetables | 100 | 100 | 0 | 1 | 4   | A |
| 75232121 | Seaweed, cooked, made with oil                                                                                          | 3000_Vegetables | 100 | 100 | 0 | 2 | 4.5 | A |
| 75233010 | Squash, summer, yellow or green, cooked, NS as to form, fat not added in cooking                                        | 3000_Vegetables | 100 | 100 | 0 | 1 | 4   | A |
| 75233011 | Summer squash, yellow or green, fresh, cooked, no added fat                                                             | 3000_Vegetables | 100 | 100 | 0 | 1 | 4   | A |
| 75233012 | Summer squash, yellow or green, frozen, cooked, no added fat                                                            | 3000_Vegetables | 100 | 100 | 0 | 1 | 4   | A |
| 75233013 | Summer squash, yellow or green, canned, cooked, no added fat                                                            | 3000_Vegetables | 100 | 100 | 0 | 1 | 3.5 | A |
| 75316030 | Squash, summer, yellow or green, with tomato sauce, cooked, fat not added in cooking                                    | 3000_Vegetables | 100 | 100 | 0 | 2 | 4   | A |
| 75330050 | Broccoli and cauliflower, cooked, no added fat                                                                          | 3000_Vegetables | 100 | 100 | 0 | 1 | 4.5 | A |
| 75330080 | Broccoli, cauliflower and carrots, cooked, no added fat                                                                 | 3000_Vegetables | 100 | 100 | 0 | 1 | 4.5 | B |
| 75340140 | Vegetable combination (green beans, broccoli, onions, mushrooms), cooked, fat not added in cooking                      | 3000_Vegetables | 100 | 100 | 0 | 1 | 4   | A |
| 75502520 | Kimchi                                                                                                                  | 3000_Vegetables | 100 | 100 | 0 | 3 | 3.5 | B |
| 89902010 | Cucumber, for use on a sandwich                                                                                         | 3000_Vegetables | 100 | 100 | 0 | 1 | 4.5 | A |
| 89902020 | Lettuce, for use on a sandwich                                                                                          | 3000_Vegetables | 100 | 100 | 0 | 1 | 4.5 | A |
| 89902030 | Mushrooms, for use on a sandwich                                                                                        | 3000_Vegetables | 100 | 100 | 0 | 1 | 4.5 | A |
| 89902050 | Pepper, for use on a sandwich                                                                                           | 3000_Vegetables | 100 | 100 | 0 | 1 | 4.5 | A |
| 89902060 | Spinach, for use on a sandwich                                                                                          | 3000_Vegetables | 100 | 100 | 0 | 1 | 5   | A |
| 89902070 | Tomatoes, for use on a sandwich                                                                                         | 3000_Vegetables | 100 | 100 | 0 | 1 | 4.5 | A |
| 75143300 | Lettuce, salad with egg, tomato, and/or carrots, with or without other vegetables, no dressing                          | 3000_Vegetables | 100 | 99  | 1 | 1 | 4.5 | A |
| 75203000 | Bamboo shoots, cooked, fat not added in cooking                                                                         | 3000_Vegetables | 100 | 99  | 1 | 1 | 4.5 | A |
| 75204993 | Beans, string, cooked, from canned, NS as to color, fat not added in cooking                                            | 3000_Vegetables | 100 | 99  | 1 | 1 | 4   | A |
| 75205022 | Green beans, frozen, cooked, no added fat                                                                               | 3000_Vegetables | 100 | 99  | 1 | 1 | 4.5 | A |
| 75205023 | Green beans, canned, cooked, no added fat                                                                               | 3000_Vegetables | 100 | 99  | 1 | 1 | 4   | A |
| 75330110 | Vegetable combination, including carrots, broccoli, and/or dark-green leafy; cooked, no sauce, fat not added in cooking | 3000_Vegetables | 100 | 99  | 1 | 1 | 4   | A |
| 75212010 | Cabbage, red, cooked, fat not added in cooking                                                                          | 3000_Vegetables | 100 | 98  | 2 | 1 | 4   | A |
| 75100750 | Artichoke, raw                                                                                                          | 3000_Vegetables | 100 | 97  | 3 | 1 | 5   | A |
| 75206011 | Beans, string, yellow, cooked, from fresh, fat not added in cooking                                                     | 3000_Vegetables | 100 | 97  | 3 | 1 | 4.5 | A |
| 75231012 | Snowpea, frozen, cooked, no added fat                                                                                   | 3000_Vegetables | 100 | 97  | 3 | 1 | 4.5 | A |
| 73101010 | Carrots, raw                                                                                                            | 3000_Vegetables | 100 | 96  | 4 | 1 | 5   | A |
| 73112000 | Carrot chips, dried                                                                                                     | 3000_Vegetables | 100 | 96  | 4 | 1 | 5   | D |
| 75204990 | Beans, string, cooked, NS as to form, NS as to color, fat not added in cooking                                          | 3000_Vegetables | 100 | 96  | 4 | 1 | 4.5 | A |
| 75205020 | Beans, string, green, cooked, NS as to form, fat not added in cooking                                                   | 3000_Vegetables | 100 | 96  | 4 | 1 | 4.5 | A |
| 75221051 | Onions, green, cooked, from fresh, fat not added in cooking                                                             | 3000_Vegetables | 100 | 95  | 5 | 1 | 3.5 | C |
| 75127500 | Seaweed, raw                                                                                                            | 3000_Vegetables | 100 | 94  | 6 | 1 | 5   | A |
| 75211020 | Cabbage, green, cooked, no added fat                                                                                    | 3000_Vegetables | 100 | 93  | 7 | 1 | 4   | A |
| 72125210 | Spinach, cooked, NS as to form, fat not added in cooking                                                                | 3000_Vegetables | 100 | 100 | 0 | 1 | 4.5 | A |
| 72125214 | Spinach, cooked, NS as to form, made with oil                                                                           | 3000_Vegetables | 100 | 100 | 0 | 2 | 4   | A |

|          |                                                                              |                 |     |     |    |   |     |   |
|----------|------------------------------------------------------------------------------|-----------------|-----|-----|----|---|-----|---|
| 72125226 | Spinach, cooked, from frozen, made with margarine                            | 3000_Vegetables | 100 | 100 | 0  | 2 | 4   | A |
| 72125229 | Spinach, cooked, from canned, made with margarine                            | 3000_Vegetables | 100 | 100 | 0  | 3 | 4   | C |
| 72107223 | Collards, canned, cooked, fat added, NS as to fat type                       | 3000_Vegetables | 99  | 100 | -1 | 2 | 4   | A |
| 72116221 | Escarole, cooked, made with oil                                              | 3000_Vegetables | 99  | 100 | -1 | 2 | 4.5 | A |
| 72118310 | Chamnamul, cooked, fat added in cooking                                      | 3000_Vegetables | 99  | 100 | -1 | 2 | 4   | C |
| 72119232 | Kale, cooked, from frozen, made with margarine                               | 3000_Vegetables | 99  | 100 | -1 | 2 | 4   | A |
| 72120250 | Lambsquarter, cooked, made with margarine                                    | 3000_Vegetables | 99  | 100 | -1 | 2 | 4   | A |
| 72201213 | Broccoli, cooked, NS as to form, made with oil                               | 3000_Vegetables | 99  | 100 | -1 | 2 | 4.5 | A |
| 72201226 | Broccoli, frozen, cooked with oil                                            | 3000_Vegetables | 99  | 100 | -1 | 2 | 4.5 | A |
| 74204500 | Tomatoes, canned, reduced sodium, cooked                                     | 3000_Vegetables | 99  | 100 | -1 | 2 | 4   | A |
| 75202026 | Asparagus, cooked, NS as to form, made with margarine                        | 3000_Vegetables | 99  | 100 | -1 | 2 | 4   | A |
| 75202029 | Asparagus, cooked, from fresh, made with margarine                           | 3000_Vegetables | 99  | 100 | -1 | 2 | 4   | A |
| 75213121 | Cactus, cooked, made with oil                                                | 3000_Vegetables | 99  | 100 | -1 | 2 | 4   | A |
| 73201010 | Pumpkin, cooked, NS as to form, fat not added in cooking                     | 3000_Vegetables | 99  | 97  | 2  | 1 | 3.5 | A |
| 73201011 | Pumpkin, cooked, from fresh, fat not added in cooking                        | 3000_Vegetables | 99  | 97  | 2  | 1 | 3.5 | A |
| 73201012 | Pumpkin, cooked, from frozen, fat not added in cooking                       | 3000_Vegetables | 99  | 97  | 2  | 1 | 3.5 | A |
| 75302010 | Beans, string, green, with tomatoes, cooked, fat not added in cooking        | 3000_Vegetables | 99  | 97  | 2  | 2 | 4   | A |
| 75231011 | Snowpea, fresh, cooked, no added fat                                         | 3000_Vegetables | 99  | 96  | 3  | 1 | 4   | A |
| 75206012 | Beans, string, yellow, cooked, from frozen, fat not added in cooking         | 3000_Vegetables | 99  | 94  | 5  | 1 | 4   | A |
| 75204992 | Beans, string, cooked, from frozen, NS as to color, fat not added in cooking | 3000_Vegetables | 99  | 93  | 6  | 1 | 4   | A |
| 72103010 | Broccoli raab, cooked, NS as to fat added in cooking                         | 3000_Vegetables | 98  | 100 | -2 | 2 | 4   | B |
| 72116223 | Escarole, cooked, made with margarine                                        | 3000_Vegetables | 98  | 100 | -2 | 2 | 4.5 | A |
| 72125225 | Spinach, frozen, cooked with butter or margarine                             | 3000_Vegetables | 98  | 100 | -2 | 2 | 4   | A |
| 72125228 | Spinach, canned, cooked with butter or margarine                             | 3000_Vegetables | 98  | 100 | -2 | 3 | 4   | A |
| 72203080 | Broccoli, chinese, cooked, NS as to form, made with oil                      | 3000_Vegetables | 98  | 100 | -2 | 2 | 4   | A |
| 72203160 | Broccoli, chinese, cooked, from frozen, made with oil                        | 3000_Vegetables | 98  | 100 | -2 | 2 | 4   | A |
| 73103023 | Carrots, canned, low sodium, made with margarine                             | 3000_Vegetables | 98  | 100 | -2 | 2 | 4.5 | A |
| 75205131 | Green beans, canned, reduced sodium, cooked with oil                         | 3000_Vegetables | 98  | 100 | -2 | 2 | 4.5 | A |
| 75210020 | Cabbage, Chinese, cooked, fat added                                          | 3000_Vegetables | 98  | 100 | -2 | 2 | 4   | A |
| 75214027 | Cauliflower, fresh, cooked with oil                                          | 3000_Vegetables | 98  | 100 | -2 | 2 | 4.5 | A |
| 75219030 | Mushrooms, cooked, NS as to form, made with oil                              | 3000_Vegetables | 98  | 100 | -2 | 2 | 4   | B |
| 75219036 | Mushrooms, cooked, from frozen, made with oil                                | 3000_Vegetables | 98  | 100 | -2 | 2 | 4   | B |
| 75511100 | Pickles, NFS                                                                 | 3000_Vegetables | 98  | 100 | -2 | 3 | 3.5 | C |
| 72107228 | Collards, fresh, cooked with butter or margarine                             | 3000_Vegetables | 98  | 99  | -1 | 2 | 5   | A |
| 72128224 | Turnip greens, cooked, NS as to form, made with oil                          | 3000_Vegetables | 98  | 99  | -1 | 2 | 4.5 | A |
| 75302040 | Beans, string, green, with almonds, cooked, fat not added in cooking         | 3000_Vegetables | 98  | 98  | 0  | 1 | 4.5 | A |
| 75340010 | Asian stir fry vegetables, cooked, no added fat                              | 3000_Vegetables | 98  | 95  | 3  | 1 | 5   | A |
| 75214011 | Cauliflower, fresh, cooked, no added fat                                     | 3000_Vegetables | 98  | 93  | 5  | 1 | 4.5 | A |

|          |                                                                                                                    |                 |    |     |    |   |     |   |
|----------|--------------------------------------------------------------------------------------------------------------------|-----------------|----|-----|----|---|-----|---|
| 72119229 | Kale, cooked, from fresh, made with margarine                                                                      | 3000_Vegetables | 97 | 100 | -3 | 2 | 4.5 | A |
| 72119235 | Kale, cooked, from canned, made with margarine                                                                     | 3000_Vegetables | 97 | 100 | -3 | 2 | 4   | A |
| 75112500 | Leek, raw                                                                                                          | 3000_Vegetables | 97 | 100 | -3 | 1 | 5   | A |
| 75211031 | Cabbage, green, cooked with oil                                                                                    | 3000_Vegetables | 97 | 99  | -2 | 2 | 4   | A |
| 75214024 | Cauliflower, cooked, NS as to form, made with oil                                                                  | 3000_Vegetables | 97 | 99  | -2 | 2 | 4.5 | A |
| 74504023 | Tomato and okra, cooked, made with margarine                                                                       | 3000_Vegetables | 97 | 98  | -1 | 3 | 4   | B |
| 75232120 | Seaweed, cooked, fat added                                                                                         | 3000_Vegetables | 97 | 94  | 3  | 2 | 4   | A |
| 72110235 | Cress, cooked, from fresh, made with margarine                                                                     | 3000_Vegetables | 96 | 100 | -4 | 2 | 4   | A |
| 72128223 | Turnip greens, canned, cooked, fat added                                                                           | 3000_Vegetables | 96 | 100 | -4 | 2 | 4   | B |
| 72201223 | Broccoli, fresh, cooked with oil                                                                                   | 3000_Vegetables | 96 | 100 | -4 | 2 | 4.5 | A |
| 72203140 | Broccoli, chinese, cooked, from fresh, made with margarine                                                         | 3000_Vegetables | 96 | 100 | -4 | 3 | 4   | A |
| 75202020 | Asparagus, NS as to form, cooked                                                                                   | 3000_Vegetables | 96 | 99  | -3 | 2 | 4   | A |
| 75203020 | Bamboo shoots, cooked, fat added in cooking                                                                        | 3000_Vegetables | 96 | 99  | -3 | 2 | 4   | A |
| 72125215 | Spinach, cooked, NS as to form, made with butter                                                                   | 3000_Vegetables | 96 | 98  | -2 | 1 | 4   | A |
| 75209030 | Brussels sprouts, cooked, NS as to form, made with oil                                                             | 3000_Vegetables | 96 | 98  | -2 | 1 | 4.5 | A |
| 75209050 | Brussels sprouts, cooked, from frozen, made with oil                                                               | 3000_Vegetables | 96 | 98  | -2 | 1 | 4.5 | A |
| 75330060 | Broccoli and cauliflower, cooked, fat added                                                                        | 3000_Vegetables | 96 | 98  | -2 | 2 | 4.5 | A |
| 72118200 | Greens, cooked, NS as to form, NS as to fat added in cooking                                                       | 3000_Vegetables | 96 | 97  | -1 | 2 | 4   | A |
| 72118201 | Greens, cooked, from fresh, NS as to fat added in cooking                                                          | 3000_Vegetables | 96 | 97  | -1 | 2 | 4   | A |
| 72125999 | Taro leaves, cooked, NS as to fat added in cooking                                                                 | 3000_Vegetables | 96 | 97  | -1 | 2 | 4.5 | A |
| 72128202 | Turnip greens, cooked, from frozen, NS as to fat added in cooking                                                  | 3000_Vegetables | 96 | 97  | -1 | 2 | 4.5 | A |
| 63105010 | Avocado, raw                                                                                                       | 3000_Vegetables | 96 | 96  | 0  | 1 | 5   | A |
| 72101240 | Beet greens, cooked, made with butter                                                                              | 3000_Vegetables | 96 | 96  | 0  | 1 | 4   | B |
| 72122202 | Mustard greens, cooked, from frozen, NS as to fat added in cooking                                                 | 3000_Vegetables | 96 | 96  | 0  | 2 | 4   | A |
| 89902000 | Avocado, for use on a sandwich                                                                                     | 3000_Vegetables | 96 | 95  | 1  | 1 | 4.5 | A |
| 75302020 | Beans, string, green, with onions, cooked, fat not added in cooking                                                | 3000_Vegetables | 96 | 91  | 5  | 1 | 4   | A |
| 72130199 | Watercress, cooked, NS as to fat added in cooking                                                                  | 3000_Vegetables | 95 | 100 | -5 | 2 | 4   | A |
| 72203100 | Broccoli, chinese, cooked, NS as to form, made with margarine                                                      | 3000_Vegetables | 95 | 100 | -5 | 3 | 4   | A |
| 72203120 | Broccoli, chinese, cooked, from fresh, made with oil                                                               | 3000_Vegetables | 95 | 100 | -5 | 2 | 4   | A |
| 75202023 | Asparagus, canned, cooked, fat added, NS as to fat type                                                            | 3000_Vegetables | 95 | 100 | -5 | 3 | 4   | B |
| 75205133 | Beans, string, green, canned, low sodium, made with margarine                                                      | 3000_Vegetables | 95 | 100 | -5 | 2 | 4.5 | A |
| 75330121 | Vegetable combination, including carrots, broccoli, and/or dark-green leafy; cooked, no sauce, made with oil       | 3000_Vegetables | 95 | 100 | -5 | 2 | 4   | B |
| 75209040 | Brussels sprouts, cooked, from fresh, made with oil                                                                | 3000_Vegetables | 95 | 99  | -4 | 2 | 4   | A |
| 75330123 | Vegetable combination, including carrots, broccoli, and/or dark-green leafy; cooked, no sauce, made with margarine | 3000_Vegetables | 95 | 98  | -3 | 2 | 4   | A |
| 72128200 | Turnip greens, cooked, NS as to form, NS as to fat added in cooking                                                | 3000_Vegetables | 95 | 97  | -2 | 2 | 4.5 | A |
| 72118203 | Greens, cooked, from canned, NS as to fat added in cooking                                                         | 3000_Vegetables | 95 | 96  | -1 | 2 | 4   | A |
| 73201013 | Pumpkin, canned, cooked                                                                                            | 3000_Vegetables | 95 | 96  | -1 | 2 | 4   | A |
| 75209021 | Brussels sprouts, fresh, cooked, fat added                                                                         | 3000_Vegetables | 95 | 96  | -1 | 1 | 4.5 | A |

|          |                                                                             |                 |    |     |    |   |     |   |
|----------|-----------------------------------------------------------------------------|-----------------|----|-----|----|---|-----|---|
| 75214032 | Cauliflower, cooked, from frozen, made with margarine                       | 3000_Vegetables | 95 | 96  | -1 | 2 | 4.5 | A |
| 72104240 | Chard, cooked, made with butter                                             | 3000_Vegetables | 95 | 95  | 0  | 1 | 4   | C |
| 72128225 | Turnip greens, cooked, NS as to form, made with butter                      | 3000_Vegetables | 95 | 95  | 0  | 1 | 4.5 | A |
| 73303010 | Winter squash, cooked, no added fat                                         | 3000_Vegetables | 95 | 93  | 2  | 1 | 4   | A |
| 75204991 | Beans, string, cooked, from fresh, NS as to color, fat not added in cooking | 3000_Vegetables | 95 | 91  | 4  | 1 | 4.5 | A |
| 75224120 | Green peas, canned, reduced sodium, cooked, no added fat                    | 3000_Vegetables | 95 | 91  | 4  | 1 | 5   | A |
| 73102212 | Carrots, frozen, cooked, no added fat                                       | 3000_Vegetables | 95 | 90  | 5  | 1 | 4.5 | A |
| 73111211 | Peas and carrots, fresh, cooked, no added fat                               | 3000_Vegetables | 95 | 90  | 5  | 1 | 5   | A |
| 72121209 | Mustard Cabbage, cooked, NS as to fat added in cooking                      | 3000_Vegetables | 94 | 100 | -6 | 2 | 4   | A |
| 75205044 | Green beans, fresh, cooked with oil                                         | 3000_Vegetables | 94 | 98  | -4 | 2 | 4.5 | A |
| 75220031 | Okra, cooked, from frozen, made with oil                                    | 3000_Vegetables | 94 | 97  | -3 | 2 | 4   | B |
| 72118202 | Greens, cooked, from frozen, NS as to fat added in cooking                  | 3000_Vegetables | 94 | 96  | -2 | 2 | 4   | A |
| 72201225 | Broccoli, cooked, from fresh, made with margarine                           | 3000_Vegetables | 94 | 96  | -2 | 2 | 4   | A |
| 75208720 | Broccoflower, cooked                                                        | 3000_Vegetables | 94 | 96  | -2 | 2 | 4.5 | A |
| 75219038 | Mushrooms, cooked, from frozen, made with margarine                         | 3000_Vegetables | 94 | 96  | -2 | 2 | 4   | B |
| 75220033 | Okra, cooked, from frozen, made with margarine                              | 3000_Vegetables | 94 | 96  | -2 | 2 | 4   | A |
| 72120200 | Lambsquarter, cooked, NS as to fat added in cooking                         | 3000_Vegetables | 94 | 95  | -1 | 2 | 4   | A |
| 72128231 | Turnip greens, cooked, from frozen, made with butter                        | 3000_Vegetables | 94 | 95  | -1 | 1 | 4.5 | A |
| 75202001 | Asparagus, cooked, from fresh, NS as to fat added in cooking                | 3000_Vegetables | 94 | 95  | -1 | 2 | 4   | A |
| 75202028 | Asparagus, fresh, cooked with butter or margarine                           | 3000_Vegetables | 94 | 95  | -1 | 2 | 4   | A |
| 75219035 | Mushrooms, cooked, from fresh, made with margarine                          | 3000_Vegetables | 94 | 95  | -1 | 2 | 4   | B |
| 72128201 | Turnip greens, cooked, from fresh, NS as to fat added in cooking            | 3000_Vegetables | 94 | 94  | 0  | 2 | 4   | A |
| 73201033 | Pumpkin, cooked, from canned, made with oil                                 | 3000_Vegetables | 94 | 94  | 0  | 1 | 4   | A |
| 72107200 | Collards, cooked, NS as to form, NS as to fat added in cooking              | 3000_Vegetables | 94 | 93  | 1  | 2 | 5   | A |
| 72107201 | Collards, cooked, from fresh, NS as to fat added in cooking                 | 3000_Vegetables | 94 | 93  | 1  | 2 | 5   | A |
| 72201215 | Broccoli, cooked, NS as to form, made with margarine                        | 3000_Vegetables | 94 | 93  | 1  | 2 | 4.5 | A |
| 72201228 | Broccoli, cooked, from frozen, made with margarine                          | 3000_Vegetables | 94 | 93  | 1  | 2 | 4.5 | A |
| 75234012 | Turnip, cooked, from frozen, fat not added in cooking                       | 3000_Vegetables | 94 | 92  | 2  | 1 | 4   | A |
| 75129000 | Turnip, raw                                                                 | 3000_Vegetables | 94 | 91  | 3  | 1 | 5   | A |
| 75219013 | Mushrooms, cooked, from canned, fat not added in cooking                    | 3000_Vegetables | 94 | 89  | 5  | 3 | 3.5 | C |
| 75224021 | Green peas, fresh, cooked, no added fat                                     | 3000_Vegetables | 94 | 89  | 5  | 1 | 5   | A |
| 75201011 | Artichoke, fresh, cooked, no added fat                                      | 3000_Vegetables | 94 | 87  | 7  | 1 | 4.5 | A |
| 75201012 | Artichoke, frozen, cooked, no added fat                                     | 3000_Vegetables | 94 | 87  | 7  | 1 | 4.5 | A |
| 75201013 | Artichoke, canned, cooked, no added fat                                     | 3000_Vegetables | 94 | 87  | 7  | 1 | 4.5 | A |
| 72203180 | Broccoli, chinese, cooked, from frozen, made with margarine                 | 3000_Vegetables | 93 | 99  | -6 | 3 | 4   | A |
| 75208290 | Bitter melon, cooked, NS as to fat added in cooking                         | 3000_Vegetables | 93 | 98  | -5 | 2 | 4   | A |
| 73103020 | Carrots, canned, reduced sodium, cooked, fat added, NS as to fat type       | 3000_Vegetables | 93 | 97  | -4 | 2 | 4   | A |
| 73201024 | Pumpkin, cooked, NS as to form, made with oil                               | 3000_Vegetables | 93 | 97  | -4 | 2 | 3.5 | A |

|          |                                                                                                          |                 |    |    |    |   |     |   |
|----------|----------------------------------------------------------------------------------------------------------|-----------------|----|----|----|---|-----|---|
| 73201030 | Pumpkin, cooked, from frozen, made with oil                                                              | 3000_Vegetables | 93 | 97 | -4 | 2 | 3.5 | A |
| 72107231 | Collards, frozen, cooked with butter or margarine                                                        | 3000_Vegetables | 93 | 95 | -2 | 2 | 4   | A |
| 75213120 | Cactus, cooked, fat added                                                                                | 3000_Vegetables | 93 | 95 | -2 | 2 | 4   | A |
| 75202000 | Asparagus, cooked, NS as to form, NS as to fat added in cooking                                          | 3000_Vegetables | 93 | 94 | -1 | 2 | 4   | A |
| 75209022 | Brussels sprouts, frozen, cooked, fat added                                                              | 3000_Vegetables | 93 | 94 | -1 | 2 | 4.5 | A |
| 72201222 | Broccoli, frozen, cooked, fat added, NS as to fat type                                                   | 3000_Vegetables | 93 | 93 | 0  | 2 | 4.5 | A |
| 75311110 | Classic mixed vegetables, canned, reduced sodium, cooked, no added fat                                   | 3000_Vegetables | 93 | 92 | 1  | 2 | 4.5 | A |
| 75316000 | Squash, summer, yellow or green, and onions, cooked, fat not added in cooking                            | 3000_Vegetables | 93 | 92 | 1  | 1 | 3.5 | A |
| 75117020 | Onions, raw                                                                                              | 3000_Vegetables | 93 | 91 | 2  | 1 | 5   | A |
| 89902040 | Onions, for use on a sandwich                                                                            | 3000_Vegetables | 93 | 91 | 2  | 1 | 4   | A |
| 75202036 | Asparagus, cooked, from canned, made with margarine                                                      | 3000_Vegetables | 92 | 97 | -5 | 3 | 3.5 | A |
| 75233024 | Squash, summer, yellow or green, cooked, NS as to form, made with oil                                    | 3000_Vegetables | 92 | 97 | -5 | 2 | 4   | A |
| 73201027 | Pumpkin, cooked, from fresh, made with oil                                                               | 3000_Vegetables | 92 | 96 | -4 | 2 | 3.5 | A |
| 75208310 | Bitter melon, cooked                                                                                     | 3000_Vegetables | 92 | 94 | -2 | 2 | 4.5 | A |
| 75340021 | Vegetable combinations, Asian style, broccoli, green pepper, water chestnut, etc., cooked, made with oil | 3000_Vegetables | 92 | 94 | -2 | 1 | 4   | A |
| 75206013 | Beans, string, yellow, cooked, from canned, fat not added in cooking                                     | 3000_Vegetables | 92 | 93 | -1 | 3 | 4   | A |
| 75209032 | Brussels sprouts, cooked, NS as to form, made with margarine                                             | 3000_Vegetables | 92 | 93 | -1 | 2 | 4.5 | A |
| 75231001 | Snowpea, cooked, from fresh, NS as to fat added in cooking                                               | 3000_Vegetables | 92 | 93 | -1 | 1 | 4   | A |
| 75330090 | Broccoli, cauliflower and carrots, cooked, fat added                                                     | 3000_Vegetables | 92 | 93 | -1 | 2 | 4.5 | B |
| 75224043 | Green peas, fresh, cooked with oil                                                                       | 3000_Vegetables | 92 | 90 | 2  | 1 | 5   | A |
| 73301010 | Squash, winter type, mashed, no fat or sugar added in cooking                                            | 3000_Vegetables | 92 | 89 | 3  | 1 | 4   | B |
| 73102210 | Carrots, cooked, NS as to form, fat not added in cooking                                                 | 3000_Vegetables | 92 | 87 | 5  | 1 | 4   | A |
| 75231010 | Snowpea, cooked, NS as to form, fat not added in cooking                                                 | 3000_Vegetables | 92 | 87 | 5  | 1 | 4.5 | A |
| 75201010 | Artichoke, cooked, NS as to form, fat not added in cooking                                               | 3000_Vegetables | 92 | 84 | 8  | 1 | 4   | A |
| 75220051 | Lettuce, cooked                                                                                          | 3000_Vegetables | 91 | 98 | -7 | 2 | 4.5 | A |
| 75233027 | Summer squash, yellow or green, fresh, cooked with oil                                                   | 3000_Vegetables | 91 | 97 | -6 | 2 | 4   | A |
| 75217301 | Flowers or blossoms of sesbania, squash, or lily, cooked                                                 | 3000_Vegetables | 91 | 96 | -5 | 2 | 4.5 | A |
| 75227099 | Radish, daikon, cooked, NS as to fat added in cooking                                                    | 3000_Vegetables | 91 | 96 | -5 | 2 | 4   | B |
| 75215030 | Celery, cooked, made with oil                                                                            | 3000_Vegetables | 91 | 95 | -4 | 2 | 4   | A |
| 75219021 | Mushrooms, fresh, cooked, fat added, NS as to fat type                                                   | 3000_Vegetables | 91 | 94 | -3 | 2 | 4.5 | A |
| 72107202 | Collards, cooked, from frozen, NS as to fat added in cooking                                             | 3000_Vegetables | 91 | 93 | -2 | 2 | 4   | A |
| 72123000 | Poke greens, cooked, NS as to fat added in cooking                                                       | 3000_Vegetables | 91 | 93 | -2 | 2 | 4   | A |
| 75202032 | Asparagus, frozen, cooked with butter or margarine                                                       | 3000_Vegetables | 91 | 93 | -2 | 2 | 4   | A |
| 75207010 | Bean sprouts, cooked, NS as to form, fat not added in cooking                                            | 3000_Vegetables | 91 | 93 | -2 | 1 | 4   | A |
| 75207011 | Bean sprouts, cooked, from fresh, fat not added in cooking                                               | 3000_Vegetables | 91 | 93 | -2 | 1 | 4   | A |
| 75212021 | Cabbage, red, cooked, made with oil                                                                      | 3000_Vegetables | 91 | 93 | -2 | 2 | 4   | A |
| 75220022 | Okra, frozen, cooked, fat added                                                                          | 3000_Vegetables | 91 | 93 | -2 | 2 | 4   | A |



|          |                                                                                                         |                 |    |    |    |   |     |   |
|----------|---------------------------------------------------------------------------------------------------------|-----------------|----|----|----|---|-----|---|
| 75340130 | Vegetable combination (green beans, broccoli, onions, mushrooms), cooked, NS as to fat added in cooking | 3000_Vegetables | 91 | 93 | -2 | 2 | 4   | A |
| 75340150 | Vegetable combination (green beans, broccoli, onions, mushrooms), cooked, fat added in cooking          | 3000_Vegetables | 91 | 93 | -2 | 2 | 4   | A |
| 72120240 | Lambsquarter, cooked, made with butter                                                                  | 3000_Vegetables | 91 | 92 | -1 | 1 | 4   | A |
| 72122200 | Mustard greens, cooked, NS as to form, NS as to fat added in cooking                                    | 3000_Vegetables | 91 | 92 | -1 | 2 | 4   | A |
| 72128400 | Turnip greens with roots, cooked, NS as to form, NS as to fat added in cooking                          | 3000_Vegetables | 91 | 92 | -1 | 2 | 4   | A |
| 72128402 | Turnip greens with roots, cooked, from frozen, NS as to fat added in cooking                            | 3000_Vegetables | 91 | 92 | -1 | 2 | 4   | A |
| 72128420 | Turnip greens with roots, cooked, NS as to form, fat added in cooking                                   | 3000_Vegetables | 91 | 92 | -1 | 2 | 4   | A |
| 72128422 | Turnip greens with roots, cooked, from frozen, fat added in cooking                                     | 3000_Vegetables | 91 | 92 | -1 | 2 | 4   | A |
| 73102224 | Carrots, frozen, cooked with oil                                                                        | 3000_Vegetables | 91 | 92 | -1 | 2 | 4.5 | A |
| 75231026 | Snowpea, cooked, from fresh, made with oil                                                              | 3000_Vegetables | 91 | 92 | -1 | 1 | 4   | A |
| 75221061 | Onions, green, cooked                                                                                   | 3000_Vegetables | 91 | 91 | 0  | 2 | 4   | A |
| 73201035 | Pumpkin, cooked, from canned, made with margarine                                                       | 3000_Vegetables | 91 | 90 | 1  | 2 | 4   | B |
| 75209052 | Brussels sprouts, cooked, from frozen, made with margarine                                              | 3000_Vegetables | 91 | 90 | 1  | 2 | 4.5 | A |
| 75215120 | Fennel bulb, cooked                                                                                     | 3000_Vegetables | 91 | 90 | 1  | 2 | 4.5 | A |
| 72128228 | Turnip greens, cooked, from fresh, made with butter                                                     | 3000_Vegetables | 91 | 89 | 2  | 2 | 4   | A |
| 74504110 | Tomato and onion, cooked, fat not added in cooking                                                      | 3000_Vegetables | 91 | 89 | 2  | 1 | 4   | A |
| 72107203 | Collards, cooked, from canned, NS as to fat added in cooking                                            | 3000_Vegetables | 91 | 88 | 3  | 2 | 4   | A |
| 75102500 | Beets, raw                                                                                              | 3000_Vegetables | 91 | 86 | 5  | 1 | 5   | A |
| 75340110 | Vegetable combinations (broccoli, carrots, corn, cauliflower, etc.), cooked, fat not added in cooking   | 3000_Vegetables | 91 | 86 | 5  | 1 | 4.5 | A |
| 73102211 | Carrots, fresh, cooked, no added fat                                                                    | 3000_Vegetables | 91 | 85 | 6  | 1 | 4   | A |
| 72107234 | Collards, canned, cooked with butter or margarine                                                       | 3000_Vegetables | 90 | 95 | -5 | 2 | 3.5 | A |
| 75233029 | Squash, summer, yellow or green, cooked, from fresh, made with margarine                                | 3000_Vegetables | 90 | 95 | -5 | 2 | 4   | A |
| 72122201 | Mustard greens, cooked, from fresh, NS as to fat added in cooking                                       | 3000_Vegetables | 90 | 92 | -2 | 2 | 4   | A |
| 72122203 | Mustard greens, cooked, from canned, NS as to fat added in cooking                                      | 3000_Vegetables | 90 | 92 | -2 | 2 | 4   | A |
| 72201221 | Broccoli, fresh, cooked, fat added, NS as to fat type                                                   | 3000_Vegetables | 90 | 92 | -2 | 2 | 4.5 | A |
| 73201026 | Pumpkin, cooked, NS as to form, made with margarine                                                     | 3000_Vegetables | 90 | 92 | -2 | 2 | 3.5 | B |
| 73201029 | Pumpkin, cooked, from fresh, made with margarine                                                        | 3000_Vegetables | 90 | 92 | -2 | 2 | 3.5 | B |
| 73201032 | Pumpkin, cooked, from frozen, made with margarine                                                       | 3000_Vegetables | 90 | 92 | -2 | 2 | 3.5 | A |
| 73303021 | Squash, winter type, baked, no sugar added in cooking, made with oil                                    | 3000_Vegetables | 90 | 92 | -2 | 1 | 3.5 | B |
| 75205047 | Green beans, frozen, cooked with oil                                                                    | 3000_Vegetables | 90 | 92 | -2 | 2 | 4.5 | A |
| 75214021 | Cauliflower, fresh, cooked, fat added, NS as to fat type                                                | 3000_Vegetables | 90 | 92 | -2 | 2 | 4.5 | A |
| 75214022 | Cauliflower, frozen, cooked, fat added, NS as to fat type                                               | 3000_Vegetables | 90 | 92 | -2 | 2 | 4.5 | A |
| 72103050 | Broccoli raab, cooked, made with butter                                                                 | 3000_Vegetables | 90 | 91 | -1 | 1 | 4   | A |
| 72128401 | Turnip greens with roots, cooked, from fresh, NS as to fat added in cooking                             | 3000_Vegetables | 90 | 91 | -1 | 2 | 4   | A |

|          |                                                                           |                 |    |    |    |   |     |   |
|----------|---------------------------------------------------------------------------|-----------------|----|----|----|---|-----|---|
| 72128421 | Turnip greens with roots, cooked, from fresh, fat added in cooking        | 3000_Vegetables | 90 | 91 | -1 | 2 | 4   | A |
| 75209020 | Brussels sprouts, NS as to form, cooked                                   | 3000_Vegetables | 90 | 90 | 0  | 2 | 4.5 | A |
| 72118225 | Greens, cooked, NS as to form, made with butter                           | 3000_Vegetables | 90 | 89 | 1  | 1 | 4   | A |
| 73102213 | Carrots, canned, cooked, no added fat                                     | 3000_Vegetables | 90 | 89 | 1  | 3 | 4   | A |
| 75220001 | Okra, cooked, from fresh, NS as to fat added in cooking                   | 3000_Vegetables | 90 | 89 | 1  | 2 | 4   | C |
| 75102000 | Beans, lima, raw                                                          | 3000_Vegetables | 90 | 88 | 2  | 1 | 5   | A |
| 75201040 | Artichoke, cooked, from frozen, made with oil                             | 3000_Vegetables | 90 | 88 | 2  | 1 | 4   | A |
| 27420080 | Greens with ham or pork                                                   | 3000_Vegetables | 90 | 87 | 3  | 2 | 4   | A |
| 72122231 | Mustard greens, cooked, from frozen, made with butter                     | 3000_Vegetables | 90 | 87 | 3  | 2 | 4   | B |
| 75234011 | Turnip, cooked, from fresh, fat not added in cooking                      | 3000_Vegetables | 90 | 83 | 7  | 1 | 4   | A |
| 75111800 | Jicama, raw                                                               | 3000_Vegetables | 90 | 82 | 8  | 1 | 5   | A |
| 75215510 | Christophine, cooked, fat not added in cooking                            | 3000_Vegetables | 90 | 82 | 8  | 1 | 4   | A |
| 72126999 | Thistle leaves, cooked, NS as to fat added in cooking                     | 3000_Vegetables | 89 | 94 | -5 | 2 | 4   | A |
| 75205130 | Green beans, canned, reduced sodium, cooked, fat added, NS as to fat type | 3000_Vegetables | 89 | 93 | -4 | 2 | 4.5 | A |
| 75233030 | Summer squash, yellow or green, frozen, cooked with oil                   | 3000_Vegetables | 89 | 93 | -4 | 2 | 4   | A |
| 74201003 | Tomatoes, canned, cooked                                                  | 3000_Vegetables | 89 | 92 | -3 | 3 | 4   | A |
| 75207021 | Bean sprouts, cooked                                                      | 3000_Vegetables | 89 | 91 | -2 | 1 | 5   | A |
| 75210022 | Cabbage, Chinese, cooked, made with butter                                | 3000_Vegetables | 89 | 91 | -2 | 2 | 3.5 | A |
| 75226060 | Peppers, red, cooked                                                      | 3000_Vegetables | 89 | 91 | -2 | 2 | 4.5 | A |
| 73102217 | Carrots, fresh, cooked with oil                                           | 3000_Vegetables | 89 | 90 | -1 | 1 | 4   | A |
| 75215121 | Fennel bulb, cooked, made with oil                                        | 3000_Vegetables | 89 | 90 | -1 | 2 | 4.5 | A |
| 75217020 | Eggplant, cooked, fat added                                               | 3000_Vegetables | 89 | 89 | 0  | 2 | 4.5 | A |
| 75231000 | Snowpea, cooked, NS as to form, NS as to fat added in cooking             | 3000_Vegetables | 89 | 89 | 0  | 1 | 4.5 | A |
| 72118234 | Greens, cooked, from canned, made with butter                             | 3000_Vegetables | 89 | 88 | 1  | 1 | 4   | A |
| 75218011 | Kohlrabi, cooked                                                          | 3000_Vegetables | 89 | 87 | 2  | 2 | 4.5 | A |
| 75302060 | Beans, string, green, with pinto beans, cooked, fat not added in cooking  | 3000_Vegetables | 89 | 87 | 2  | 3 | 5   | A |
| 72107225 | Collards, cooked, NS as to form, made with butter                         | 3000_Vegetables | 89 | 86 | 3  | 1 | 4.5 | A |
| 75201034 | Artichoke, cooked, from fresh, made with oil                              | 3000_Vegetables | 89 | 86 | 3  | 1 | 4.5 | A |
| 75226010 | Peppers, green, cooked, fat not added in cooking                          | 3000_Vegetables | 89 | 86 | 3  | 1 | 4   | A |
| 75226050 | Peppers, red, cooked, fat not added in cooking                            | 3000_Vegetables | 89 | 86 | 3  | 1 | 4   | A |
| 75306998 | Peppers and onions, cooked, no added fat                                  | 3000_Vegetables | 89 | 85 | 4  | 1 | 4.5 | A |
| 73102227 | Carrots, canned, cooked with oil                                          | 3000_Vegetables | 88 | 94 | -6 | 3 | 4   | A |
| 75226061 | Peppers, red, cooked, made with oil                                       | 3000_Vegetables | 88 | 92 | -4 | 2 | 4   | A |
| 75205031 | Green beans, fresh, cooked, fat added, NS as to fat type                  | 3000_Vegetables | 88 | 90 | -2 | 2 | 4.5 | A |
| 72113200 | Dandelion greens, cooked, NS as to fat added in cooking                   | 3000_Vegetables | 88 | 89 | -1 | 2 | 4   | B |
| 73102214 | Carrots, cooked, NS as to form, made with oil                             | 3000_Vegetables | 88 | 89 | -1 | 2 | 4   | A |
| 75224131 | Green peas, canned, reduced sodium, cooked with oil                       | 3000_Vegetables | 88 | 89 | -1 | 1 | 5   | A |
| 75220023 | Okra, cooked, from canned, fat added in cooking, NS as to type of fat     | 3000_Vegetables | 88 | 88 | 0  | 2 | 4   | C |

|          |                                                                                                            |                 |    |    |    |   |     |   |
|----------|------------------------------------------------------------------------------------------------------------|-----------------|----|----|----|---|-----|---|
| 75231022 | Snowpea, frozen, cooked, fat added                                                                         | 3000_Vegetables | 88 | 88 | 0  | 1 | 4.5 | A |
| 75231029 | Snowpea, cooked, from frozen, made with oil                                                                | 3000_Vegetables | 88 | 88 | 0  | 1 | 4.5 | A |
| 75340020 | Asian stir fry vegetables, cooked, fat added                                                               | 3000_Vegetables | 88 | 88 | 0  | 2 | 5   | A |
| 75340100 | Vegetable combinations (broccoli, carrots, corn, cauliflower, etc.), cooked, NS as to fat added in cooking | 3000_Vegetables | 88 | 88 | 0  | 2 | 4   | A |
| 75340120 | Vegetable combinations (broccoli, carrots, corn, cauliflower, etc.), cooked, fat added in cooking          | 3000_Vegetables | 88 | 88 | 0  | 2 | 4   | A |
| 75218010 | Kohlrabi, cooked, fat not added in cooking                                                                 | 3000_Vegetables | 88 | 86 | 2  | 1 | 4   | B |
| 74505010 | Tomato with corn and okra, cooked, fat not added in cooking                                                | 3000_Vegetables | 88 | 85 | 3  | 3 | 4   | B |
| 75228010 | Rutabaga, cooked, fat not added in cooking                                                                 | 3000_Vegetables | 88 | 85 | 3  | 1 | 4   | B |
| 72128203 | Turnip greens, cooked, from canned, NS as to fat added in cooking                                          | 3000_Vegetables | 87 | 92 | -5 | 2 | 4   | A |
| 72119200 | Kale, cooked, NS as to form, NS as to fat added in cooking                                                 | 3000_Vegetables | 87 | 91 | -4 | 2 | 4   | C |
| 72119201 | Kale, cooked, from fresh, NS as to fat added in cooking                                                    | 3000_Vegetables | 87 | 91 | -4 | 2 | 4   | C |
| 75226021 | Peppers, green, cooked, made with oil                                                                      | 3000_Vegetables | 87 | 91 | -4 | 2 | 4   | A |
| 72119202 | Kale, cooked, from frozen, NS as to fat added in cooking                                                   | 3000_Vegetables | 87 | 90 | -3 | 2 | 4   | B |
| 75203028 | Bamboo shoots, cooked                                                                                      | 3000_Vegetables | 87 | 90 | -3 | 2 | 4.5 | A |
| 75211033 | Cabbage, green, cooked, made with margarine                                                                | 3000_Vegetables | 87 | 89 | -2 | 2 | 4   | A |
| 75212020 | Cabbage, red, cooked                                                                                       | 3000_Vegetables | 87 | 89 | -2 | 2 | 4   | A |
| 75215020 | Celery, cooked                                                                                             | 3000_Vegetables | 87 | 89 | -2 | 2 | 4   | A |
| 75219034 | Mushrooms, fresh, cooked with butter or margarine                                                          | 3000_Vegetables | 87 | 89 | -2 | 2 | 4   | B |
| 75226020 | Peppers, green, cooked                                                                                     | 3000_Vegetables | 87 | 89 | -2 | 2 | 4   | A |
| 73103000 | Carrots, canned, low sodium, NS as to fat added in cooking                                                 | 3000_Vegetables | 87 | 87 | 0  | 2 | 4   | A |
| 73111224 | Peas and carrots, cooked, NS as to form, made with oil                                                     | 3000_Vegetables | 87 | 87 | 0  | 1 | 4.5 | A |
| 73111227 | Peas and carrots, cooked, from fresh, made with oil                                                        | 3000_Vegetables | 87 | 87 | 0  | 1 | 4.5 | A |
| 73111230 | Peas and carrots, cooked, from frozen, made with oil                                                       | 3000_Vegetables | 87 | 87 | 0  | 1 | 4.5 | A |
| 75302045 | Beans, string, green, with almonds, cooked, fat added in cooking, NS as to type of fat                     | 3000_Vegetables | 87 | 87 | 0  | 1 | 4.5 | A |
| 72118228 | Greens, cooked, from fresh, made with butter                                                               | 3000_Vegetables | 87 | 86 | 1  | 1 | 4   | A |
| 74504000 | Tomato and okra, cooked, NS as to fat added in cooking                                                     | 3000_Vegetables | 87 | 86 | 1  | 2 | 4   | B |
| 74504020 | Tomato and okra, cooked, fat added in cooking, NS as to type of fat                                        | 3000_Vegetables | 87 | 86 | 1  | 2 | 4   | B |
| 75230020 | Sauerkraut, cooked, fat added in cooking                                                                   | 3000_Vegetables | 87 | 86 | 1  | 3 | 3.5 | C |
| 73111220 | Peas and carrots, cooked, NS as to form                                                                    | 3000_Vegetables | 87 | 85 | 2  | 1 | 5   | A |
| 73111221 | Peas and carrots, fresh, cooked, fat added                                                                 | 3000_Vegetables | 87 | 85 | 2  | 1 | 5   | A |
| 73111212 | Peas and carrots, frozen, cooked, no added fat                                                             | 3000_Vegetables | 87 | 81 | 6  | 1 | 4.5 | A |
| 75205052 | Beans, string, green, cooked, from canned, made with margarine                                             | 3000_Vegetables | 86 | 90 | -4 | 2 | 4   | A |
| 72119203 | Kale, cooked, from canned, NS as to fat added in cooking                                                   | 3000_Vegetables | 86 | 89 | -3 | 2 | 4   | C |
| 75340300 | Pinacbet                                                                                                   | 3000_Vegetables | 86 | 89 | -3 | 2 | 3.5 | A |
| 75231021 | Snowpea, fresh, cooked, fat added                                                                          | 3000_Vegetables | 86 | 86 | 0  | 2 | 4   | A |
| 72123040 | Poke greens, cooked, made with butter                                                                      | 3000_Vegetables | 86 | 85 | 1  | 2 | 4   | B |
| 73102216 | Carrots, cooked, NS as to form, made with margarine                                                        | 3000_Vegetables | 86 | 85 | 1  | 2 | 4   | A |
| 73102226 | Carrots, cooked, from frozen, made with margarine                                                          | 3000_Vegetables | 86 | 85 | 1  | 2 | 4   | B |

|          |                                                                                  |                 |    |    |    |   |     |   |
|----------|----------------------------------------------------------------------------------|-----------------|----|----|----|---|-----|---|
| 75511040 | Pepper, hot, pickled                                                             | 3000_Vegetables | 85 | 90 | -5 | 4 | 2.5 | D |
| 75214029 | Cauliflower, cooked, from fresh, made with margarine                             | 3000_Vegetables | 85 | 88 | -3 | 2 | 4.5 | B |
| 72128234 | Turnip greens, cooked, from canned, made with butter                             | 3000_Vegetables | 85 | 87 | -2 | 2 | 4   | B |
| 74201001 | Tomatoes, fresh, cooked                                                          | 3000_Vegetables | 85 | 87 | -2 | 2 | 4   | A |
| 74504121 | Tomato and onion, cooked, made with oil                                          | 3000_Vegetables | 85 | 87 | -2 | 2 | 4   | A |
| 75204960 | Beans, string, cooked, NS as to form, NS as to color, made with oil              | 3000_Vegetables | 85 | 86 | -1 | 2 | 4.5 | A |
| 75204963 | Beans, string, cooked, from fresh, NS as to color, made with oil                 | 3000_Vegetables | 85 | 86 | -1 | 2 | 4.5 | A |
| 75204966 | Beans, string, cooked, from frozen, NS as to color, made with oil                | 3000_Vegetables | 85 | 86 | -1 | 2 | 4   | A |
| 75205041 | Beans, string, green, cooked, NS as to form, made with oil                       | 3000_Vegetables | 85 | 86 | -1 | 2 | 4.5 | A |
| 75206030 | Beans, string, yellow, cooked, NS as to form, made with oil                      | 3000_Vegetables | 85 | 86 | -1 | 2 | 4.5 | A |
| 72118231 | Greens, cooked, from frozen, made with butter                                    | 3000_Vegetables | 85 | 85 | 0  | 1 | 4   | B |
| 72201220 | Broccoli, NS as to form, cooked                                                  | 3000_Vegetables | 85 | 85 | 0  | 2 | 4.5 | A |
| 73103022 | Carrots, canned, reduced sodium, cooked with butter or margarine                 | 3000_Vegetables | 85 | 85 | 0  | 2 | 4   | A |
| 73303023 | Squash, winter type, baked, no sugar added in cooking, made with margarine       | 3000_Vegetables | 85 | 85 | 0  | 2 | 3.5 | A |
| 72122234 | Mustard greens, cooked, from canned, made with butter                            | 3000_Vegetables | 85 | 84 | 1  | 1 | 4   | A |
| 75231025 | Snowpea, cooked, NS as to form, made with margarine                              | 3000_Vegetables | 85 | 84 | 1  | 2 | 4.5 | A |
| 75202025 | Asparagus, cooked, NS as to form, made with butter                               | 3000_Vegetables | 85 | 83 | 2  | 2 | 4   | A |
| 75231031 | Snowpea, cooked, from frozen, made with margarine                                | 3000_Vegetables | 85 | 83 | 2  | 2 | 4.5 | A |
| 72201200 | Broccoli, cooked, NS as to form, NS as to fat added in cooking                   | 3000_Vegetables | 85 | 82 | 3  | 2 | 4.5 | A |
| 75216710 | Cucumber, cooked, fat not added in cooking                                       | 3000_Vegetables | 85 | 82 | 3  | 1 | 3.5 | A |
| 75224031 | Green peas, fresh, cooked, fat added, NS as to fat type                          | 3000_Vegetables | 85 | 82 | 3  | 1 | 5   | A |
| 75204110 | Beans, lima, immature, canned, low sodium, fat not added in cooking              | 3000_Vegetables | 85 | 80 | 5  | 1 | 5   | A |
| 73111210 | Peas and carrots, cooked, NS as to form, fat not added in cooking                | 3000_Vegetables | 85 | 79 | 6  | 1 | 4.5 | A |
| 72110200 | Cress, cooked, NS as to form, NS as to fat added in cooking                      | 3000_Vegetables | 84 | 89 | -5 | 2 | 4   | A |
| 72110201 | Cress, cooked, from fresh, NS as to fat added in cooking                         | 3000_Vegetables | 84 | 89 | -5 | 2 | 4   | A |
| 72110203 | Cress, cooked, from canned, NS as to fat added in cooking                        | 3000_Vegetables | 84 | 89 | -5 | 2 | 4   | A |
| 72110220 | Cress, cooked, NS as to form, fat added in cooking, NS as to type of fat         | 3000_Vegetables | 84 | 89 | -5 | 2 | 4   | A |
| 72110223 | Cress, cooked, from canned, fat added in cooking, NS as to type of fat           | 3000_Vegetables | 84 | 89 | -5 | 2 | 4   | A |
| 75233021 | Summer squash, yellow or green, fresh, cooked, fat added, NS as to fat type      | 3000_Vegetables | 84 | 89 | -5 | 2 | 4   | A |
| 73210010 | Calabaza, cooked                                                                 | 3000_Vegetables | 84 | 88 | -4 | 2 | 4   | A |
| 72110237 | Cress, cooked, from canned, made with butter                                     | 3000_Vegetables | 84 | 87 | -3 | 2 | 4   | A |
| 75202035 | Asparagus, canned, cooked with butter or margarine                               | 3000_Vegetables | 84 | 86 | -2 | 3 | 3.5 | A |
| 75219020 | Mushrooms, NS as to form, cooked                                                 | 3000_Vegetables | 84 | 86 | -2 | 2 | 4.5 | A |
| 75316031 | Squash, summer, yellow or green, with tomato sauce, cooked, fat added in cooking | 3000_Vegetables | 84 | 86 | -2 | 2 | 4   | A |
| 73303020 | Winter squash, cooked, fat added                                                 | 3000_Vegetables | 84 | 85 | -1 | 2 | 4   | A |
| 73102222 | Carrots, frozen, cooked, fat added, NS as to fat type                            | 3000_Vegetables | 84 | 84 | 0  | 2 | 4.5 | A |

|          |                                                                                                               |                 |    |    |    |   |     |   |
|----------|---------------------------------------------------------------------------------------------------------------|-----------------|----|----|----|---|-----|---|
| 75204965 | Beans, string, cooked, from fresh, NS as to color, made with margarine                                        | 3000_Vegetables | 84 | 84 | 0  | 2 | 4.5 | A |
| 75205046 | Beans, string, green, cooked, from fresh, made with margarine                                                 | 3000_Vegetables | 84 | 84 | 0  | 2 | 4.5 | A |
| 72113240 | Dandelion greens, cooked, made with butter                                                                    | 3000_Vegetables | 84 | 83 | 1  | 1 | 4   | B |
| 73102219 | Carrots, cooked, from fresh, made with margarine                                                              | 3000_Vegetables | 84 | 83 | 1  | 2 | 4   | A |
| 75204962 | Beans, string, cooked, NS as to form, NS as to color, made with margarine                                     | 3000_Vegetables | 84 | 83 | 1  | 2 | 4.5 | A |
| 72201202 | Broccoli, cooked, from frozen, NS as to fat added in cooking                                                  | 3000_Vegetables | 84 | 82 | 2  | 2 | 4.5 | A |
| 72201227 | Broccoli, frozen, cooked with butter or margarine                                                             | 3000_Vegetables | 84 | 82 | 2  | 2 | 4.5 | A |
| 75209000 | Brussels sprouts, cooked, NS as to form, NS as to fat added in cooking                                        | 3000_Vegetables | 84 | 82 | 2  | 2 | 4.5 | A |
| 75201020 | Artichokes, NS as to form, cooked                                                                             | 3000_Vegetables | 84 | 80 | 4  | 1 | 4.5 | A |
| 75201021 | Artichoke, fresh, cooked, fat added                                                                           | 3000_Vegetables | 84 | 80 | 4  | 1 | 4.5 | A |
| 75201023 | Artichoke, canned, cooked, fat added                                                                          | 3000_Vegetables | 84 | 80 | 4  | 1 | 4.5 | A |
| 75503010 | Pickles, dill                                                                                                 | 3000_Vegetables | 83 | 91 | -8 | 4 | 3.5 | C |
| 72110231 | Cress, cooked, NS as to form, made with butter                                                                | 3000_Vegetables | 83 | 86 | -3 | 2 | 4   | A |
| 72110234 | Cress, cooked, from fresh, made with butter                                                                   | 3000_Vegetables | 83 | 86 | -3 | 2 | 4   | A |
| 72132199 | Bitter melon leaves, horseradish leaves, jute leaves, or radish leaves, cooked, NS as to fat added in cooking | 3000_Vegetables | 83 | 86 | -3 | 2 | 4   | C |
| 75209001 | Brussels sprouts, cooked, from fresh, NS as to fat added in cooking                                           | 3000_Vegetables | 83 | 86 | -3 | 2 | 4   | A |
| 75316022 | Squash, summer, yellow or green, and onions, cooked, made with oil                                            | 3000_Vegetables | 83 | 86 | -3 | 2 | 3.5 | A |
| 72128403 | Turnip greens with roots, cooked, from canned, NS as to fat added in cooking                                  | 3000_Vegetables | 83 | 85 | -2 | 2 | 3.5 | A |
| 72128423 | Turnip greens with roots, cooked, from canned, fat added in cooking                                           | 3000_Vegetables | 83 | 85 | -2 | 2 | 3.5 | A |
| 72201190 | Broccoli, cooked, from restaurant                                                                             | 3000_Vegetables | 83 | 85 | -2 | 2 | 4   | A |
| 75215511 | Christophine, cooked                                                                                          | 3000_Vegetables | 83 | 85 | -2 | 2 | 4   | A |
| 75340200 | Jai, Monk's Food                                                                                              | 3000_Vegetables | 83 | 85 | -2 | 2 | 4   | A |
| 73403021 | Sweet potato, baked, peel not eaten, made with oil                                                            | 3000_Vegetables | 83 | 84 | -1 | 1 | 4   | B |
| 75214020 | Cauliflower, NS as to form, cooked                                                                            | 3000_Vegetables | 83 | 84 | -1 | 2 | 4.5 | A |
| 72201201 | Broccoli, cooked, from fresh, NS as to fat added in cooking                                                   | 3000_Vegetables | 83 | 83 | 0  | 2 | 4   | A |
| 75205032 | Green beans, frozen, cooked, fat added, NS as to fat type                                                     | 3000_Vegetables | 83 | 83 | 0  | 2 | 4.5 | A |
| 75205043 | Beans, string, green, cooked, NS as to form, made with margarine                                              | 3000_Vegetables | 83 | 83 | 0  | 2 | 4.5 | A |
| 75211030 | Cabbage, green, cooked, fat added, NS as to fat type                                                          | 3000_Vegetables | 83 | 83 | 0  | 2 | 4   | A |
| 73111226 | Peas and carrots, cooked, NS as to form, made with margarine                                                  | 3000_Vegetables | 83 | 82 | 1  | 2 | 4.5 | A |
| 73111229 | Peas and carrots, cooked, from fresh, made with margarine                                                     | 3000_Vegetables | 83 | 82 | 1  | 2 | 4.5 | A |
| 73111232 | Peas and carrots, cooked, from frozen, made with margarine                                                    | 3000_Vegetables | 83 | 82 | 1  | 2 | 4.5 | A |
| 75205049 | Beans, string, green, cooked, from frozen, made with margarine                                                | 3000_Vegetables | 83 | 82 | 1  | 2 | 4   | A |
| 75214028 | Cauliflower, fresh, cooked with butter or margarine                                                           | 3000_Vegetables | 83 | 82 | 1  | 2 | 4.5 | A |
| 75224133 | Peas, green, canned, low sodium, made with margarine                                                          | 3000_Vegetables | 83 | 82 | 1  | 3 | 5   | A |
| 75302047 | Beans, string, green, with almonds, cooked, made with butter                                                  | 3000_Vegetables | 83 | 82 | 1  | 1 | 4   | A |
| 75209002 | Brussels sprouts, cooked, from frozen, NS as to fat added in cooking                                          | 3000_Vegetables | 83 | 81 | 2  | 2 | 4.5 | A |
| 75219000 | Mushrooms, cooked, NS as to form, NS as to fat added in cooking                                               | 3000_Vegetables | 83 | 81 | 2  | 2 | 4   | B |

|          |                                                                                                        |                 |    |    |    |   |     |   |
|----------|--------------------------------------------------------------------------------------------------------|-----------------|----|----|----|---|-----|---|
| 75219001 | Mushrooms, cooked, from fresh, NS as to fat added in cooking                                           | 3000_Vegetables | 83 | 81 | 2  | 2 | 4   | B |
| 75219002 | Mushrooms, cooked, from frozen, NS as to fat added in cooking                                          | 3000_Vegetables | 83 | 81 | 2  | 2 | 4   | B |
| 75219022 | Mushrooms, cooked, from frozen, fat added in cooking, NS as to type of fat                             | 3000_Vegetables | 83 | 81 | 2  | 2 | 4   | B |
| 75220000 | Okra, cooked, NS as to form, NS as to fat added in cooking                                             | 3000_Vegetables | 83 | 81 | 2  | 2 | 4   | B |
| 75311027 | Classic mixed vegetables, frozen, cooked with oil                                                      | 3000_Vegetables | 83 | 81 | 2  | 1 | 4.5 | A |
| 75315216 | Peas and mushrooms, cooked, made with oil                                                              | 3000_Vegetables | 83 | 81 | 2  | 1 | 4.5 | B |
| 75143350 | Lettuce, salad with egg, cheese, tomato, and/or carrots, with or without other vegetables, no dressing | 3000_Vegetables | 83 | 80 | 3  | 2 | 4   | A |
| 75220028 | Okra, cooked, from fresh, made with butter                                                             | 3000_Vegetables | 83 | 79 | 4  | 1 | 4   | C |
| 72203030 | Broccoli, chinese, cooked, from frozen, NS as to fat added in cooking                                  | 3000_Vegetables | 82 | 87 | -5 | 2 | 4   | B |
| 72203110 | Broccoli, chinese, cooked, from fresh, fat added in cooking, NS as to type of fat                      | 3000_Vegetables | 82 | 87 | -5 | 2 | 4   | B |
| 73201020 | Pumpkin, cooked                                                                                        | 3000_Vegetables | 82 | 86 | -4 | 2 | 3.5 | A |
| 75207000 | Bean sprouts, cooked, NS as to form, NS as to fat added in cooking                                     | 3000_Vegetables | 82 | 86 | -4 | 2 | 4   | A |
| 75207001 | Bean sprouts, cooked, from fresh, NS as to fat added in cooking                                        | 3000_Vegetables | 82 | 86 | -4 | 2 | 4   | A |
| 75207020 | Bean sprouts, cooked, NS as to form, fat added in cooking                                              | 3000_Vegetables | 82 | 86 | -4 | 2 | 4   | A |
| 75204971 | Beans, string, cooked, from canned, NS as to color, made with margarine                                | 3000_Vegetables | 82 | 85 | -3 | 2 | 4   | A |
| 75204969 | Beans, string, cooked, from canned, NS as to color, made with oil                                      | 3000_Vegetables | 82 | 84 | -2 | 2 | 4   | A |
| 75205050 | Green beans, canned, cooked with oil                                                                   | 3000_Vegetables | 82 | 84 | -2 | 2 | 4   | A |
| 75219003 | Mushrooms, cooked, from canned, NS as to fat added in cooking                                          | 3000_Vegetables | 82 | 84 | -2 | 3 | 3.5 | C |
| 73402021 | Sweet potato, baked, peel eaten, made with oil                                                         | 3000_Vegetables | 82 | 83 | -1 | 1 | 4   | B |
| 75234027 | Turnip, cooked, from fresh, made with oil                                                              | 3000_Vegetables | 82 | 83 | -1 | 2 | 4   | A |
| 72201224 | Broccoli, fresh, cooked with butter or margarine                                                       | 3000_Vegetables | 82 | 82 | 0  | 2 | 4   | A |
| 75206020 | Yellow string beans, cooked                                                                            | 3000_Vegetables | 82 | 82 | 0  | 2 | 4.5 | A |
| 75302009 | Beans, string, green, with tomatoes, cooked, NS as to fat added in cooking                             | 3000_Vegetables | 82 | 82 | 0  | 2 | 4   | A |
| 75302011 | Beans, string, green, with tomatoes, cooked, fat added in cooking                                      | 3000_Vegetables | 82 | 82 | 0  | 2 | 4   | A |
| 75214000 | Cauliflower, cooked, NS as to form, NS as to fat added in cooking                                      | 3000_Vegetables | 82 | 81 | 1  | 2 | 4.5 | B |
| 75220002 | Okra, cooked, from frozen, NS as to fat added in cooking                                               | 3000_Vegetables | 82 | 81 | 1  | 2 | 4   | B |
| 75231020 | Snowpea, NS as to form, cooked                                                                         | 3000_Vegetables | 82 | 81 | 1  | 2 | 4   | A |
| 73102221 | Carrots, fresh, cooked, fat added, NS as to fat type                                                   | 3000_Vegetables | 82 | 80 | 2  | 2 | 4   | A |
| 73201003 | Pumpkin, cooked, from canned, NS as to fat added in cooking                                            | 3000_Vegetables | 82 | 78 | 4  | 1 | 4   | B |
| 73201023 | Pumpkin, cooked, from canned, fat added in cooking, NS as to type of fat                               | 3000_Vegetables | 82 | 78 | 4  | 1 | 4   | B |
| 73402010 | Sweet potato, baked, peel eaten, no added fat                                                          | 3000_Vegetables | 82 | 78 | 4  | 1 | 4   | B |
| 75302020 | Beans, string, green, with onions, cooked, fat not added in cooking                                    | 3000_Vegetables | 82 | 77 | 5  | 1 | 4   | A |
| 75315210 | Peas and mushrooms, cooked, fat not added in cooking                                                   | 3000_Vegetables | 82 | 75 | 7  | 1 | 4.5 | B |
| 72203150 | Broccoli, chinese, cooked, from frozen, fat added in cooking, NS as to type of fat                     | 3000_Vegetables | 81 | 85 | -4 | 2 | 4   | B |
| 75205110 | Beans, string, green, canned, low sodium, NS as to fat added in cooking                                | 3000_Vegetables | 81 | 84 | -3 | 2 | 4   | A |

|          |                                                                                                                                           |                 |    |    |    |   |     |   |
|----------|-------------------------------------------------------------------------------------------------------------------------------------------|-----------------|----|----|----|---|-----|---|
| 75226023 | Peppers, green, cooked, made with margarine                                                                                               | 3000_Vegetables | 81 | 84 | -3 | 2 | 4   | B |
| 75227110 | Daikon radish, cooked                                                                                                                     | 3000_Vegetables | 81 | 83 | -2 | 2 | 4   | A |
| 74504123 | Tomato and onion, cooked, made with margarine                                                                                             | 3000_Vegetables | 81 | 82 | -1 | 2 | 3.5 | A |
| 74505021 | Tomato with corn and okra, cooked, made with oil                                                                                          | 3000_Vegetables | 81 | 82 | -1 | 2 | 4   | B |
| 74504148 | Tomato and celery, cooked, NS as to fat added in cooking                                                                                  | 3000_Vegetables | 81 | 81 | 0  | 3 | 3.5 | B |
| 75214031 | Cauliflower, frozen, cooked with butter or margarine                                                                                      | 3000_Vegetables | 81 | 81 | 0  | 2 | 4.5 | A |
| 75307000 | Peppers and onions, cooked, fat added                                                                                                     | 3000_Vegetables | 81 | 81 | 0  | 2 | 4.5 | A |
| 75205045 | Green beans, fresh, cooked with butter or margarine                                                                                       | 3000_Vegetables | 81 | 80 | 1  | 2 | 4.5 | A |
| 75214002 | Cauliflower, cooked, from frozen, NS as to fat added in cooking                                                                           | 3000_Vegetables | 81 | 80 | 1  | 2 | 4.5 | B |
| 75330120 | Vegetable combination, including carrots, broccoli, and/or dark-green leafy; cooked, no sauce, fat added in cooking, NS as to type of fat | 3000_Vegetables | 81 | 80 | 1  | 2 | 4   | B |
| 73111222 | Peas and carrots, frozen, cooked, fat added                                                                                               | 3000_Vegetables | 81 | 78 | 3  | 1 | 4.5 | A |
| 75200121 | Vegetables, NS as to type, cooked, made with oil                                                                                          | 3000_Vegetables | 81 | 78 | 3  | 1 | 4.5 | A |
| 75211032 | Cabbage, green, cooked with butter or margarine                                                                                           | 3000_Vegetables | 81 | 78 | 3  | 2 | 4   | A |
| 75224046 | Green peas, frozen, cooked with oil                                                                                                       | 3000_Vegetables | 81 | 78 | 3  | 1 | 5   | A |
| 72201214 | Broccoli, cooked, NS as to form, made with butter                                                                                         | 3000_Vegetables | 81 | 77 | 4  | 1 | 4   | A |
| 73403010 | Sweet potato, baked, peel not eaten, no added fat                                                                                         | 3000_Vegetables | 81 | 77 | 4  | 1 | 4   | B |
| 75311024 | Mixed vegetables, cooked, NS as to form, made with oil                                                                                    | 3000_Vegetables | 81 | 77 | 4  | 1 | 4.5 | A |
| 75311012 | Classic mixed vegetables, frozen, cooked, no added fat                                                                                    | 3000_Vegetables | 81 | 74 | 7  | 1 | 4.5 | A |
| 75503110 | Cucumber pickles, dill, reduced salt                                                                                                      | 3000_Vegetables | 80 | 87 | -7 | 4 | 4   | A |
| 72203010 | Broccoli, chinese, cooked, NS as to form, NS as to fat added in cooking                                                                   | 3000_Vegetables | 80 | 84 | -4 | 2 | 4   | B |
| 72203020 | Broccoli, chinese, cooked, from fresh, NS as to fat added in cooking                                                                      | 3000_Vegetables | 80 | 84 | -4 | 2 | 4   | B |
| 73102223 | Carrots, canned, cooked, fat added, NS as to fat type                                                                                     | 3000_Vegetables | 80 | 83 | -3 | 3 | 4   | A |
| 75205132 | Green beans, canned, reduced sodium, cooked with butter or margarine                                                                      | 3000_Vegetables | 80 | 83 | -3 | 2 | 4   | A |
| 75228021 | Rutabaga, cooked, made with oil                                                                                                           | 3000_Vegetables | 80 | 82 | -2 | 2 | 4   | B |
| 72119228 | Kale, cooked, from fresh, made with butter                                                                                                | 3000_Vegetables | 80 | 81 | -1 | 1 | 4   | A |
| 75311120 | Classic mixed vegetables, canned, reduced sodium, cooked, fat added, NS as to fat type                                                    | 3000_Vegetables | 80 | 81 | -1 | 2 | 4.5 | A |
| 75230000 | Sauerkraut                                                                                                                                | 3000_Vegetables | 80 | 80 | 0  | 3 | 3.5 | C |
| 75302211 | Beans, string, green, with onions, cooked, made with oil                                                                                  | 3000_Vegetables | 80 | 80 | 0  | 2 | 4   | A |
| 75330100 | Vegetable combination, including carrots, broccoli, and/or dark-green leafy; cooked, no sauce, NS as to fat added in cooking              | 3000_Vegetables | 80 | 80 | 0  | 2 | 4   | A |
| 72122225 | Mustard greens, cooked, NS as to form, made with butter                                                                                   | 3000_Vegetables | 80 | 79 | 1  | 1 | 4   | A |
| 72122228 | Mustard greens, cooked, from fresh, made with butter                                                                                      | 3000_Vegetables | 80 | 79 | 1  | 1 | 4   | B |
| 73402023 | Sweet potato, baked, peel eaten, made with margarine                                                                                      | 3000_Vegetables | 80 | 79 | 1  | 1 | 4   | B |
| 75311100 | Mixed vegetables, canned, low sodium, NS as to fat added in cooking                                                                       | 3000_Vegetables | 80 | 79 | 1  | 3 | 4.5 | A |
| 75213100 | Cactus, cooked, NS as to fat added in cooking                                                                                             | 3000_Vegetables | 80 | 78 | 2  | 2 | 4   | A |
| 75224130 | Green peas, canned, reduced sodium, cooked, fat added, NS as to fat type                                                                  | 3000_Vegetables | 80 | 78 | 2  | 1 | 5   | A |

|          |                                                                                                                                                |                 |    |    |    |   |     |   |
|----------|------------------------------------------------------------------------------------------------------------------------------------------------|-----------------|----|----|----|---|-----|---|
| 71001000 | White potato, raw, with or without peel (assume peel not eaten)                                                                                | 3000_Vegetables | 80 | 77 | 3  | 1 | 5   | A |
| 75204120 | Beans, lima, immature, canned, low sodium, fat added in cooking                                                                                | 3000_Vegetables | 80 | 77 | 3  | 1 | 5   | A |
| 72116222 | Escarole, cooked, made with butter                                                                                                             | 3000_Vegetables | 80 | 76 | 4  | 2 | 4   | A |
| 75219100 | Mushroom, Asian, cooked, from dried                                                                                                            | 3000_Vegetables | 80 | 75 | 5  | 1 | 4.5 | B |
| 75208011 | Beets, fresh, cooked, no added fat                                                                                                             | 3000_Vegetables | 80 | 72 | 8  | 1 | 4   | A |
| 72116150 | Caesar salad, with romaine, no dressing                                                                                                        | 3000_Vegetables | 79 | 82 | -3 | 3 | 4.5 | A |
| 75205005 | Green beans, cooked, from restaurant                                                                                                           | 3000_Vegetables | 79 | 81 | -2 | 2 | 4.5 | A |
| 75233022 | Summer squash, yellow or green, frozen, cooked, fat added, NS as to fat type                                                                   | 3000_Vegetables | 79 | 81 | -2 | 2 | 4   | A |
| 72119231 | Kale, cooked, from frozen, made with butter                                                                                                    | 3000_Vegetables | 79 | 80 | -1 | 1 | 4   | A |
| 75316024 | Squash, summer, yellow or green, and onions, cooked, made with margarine                                                                       | 3000_Vegetables | 79 | 80 | -1 | 2 | 3.5 | A |
| 75316032 | Squash, summer, yellow or green, with tomato sauce, cooked, NS as to fat added in cooking                                                      | 3000_Vegetables | 79 | 80 | -1 | 2 | 4   | A |
| 73403023 | Sweet potato, baked, peel not eaten, made with margarine                                                                                       | 3000_Vegetables | 79 | 78 | 1  | 2 | 4   | B |
| 75221040 | Onions, green, cooked, NS as to form, NS as to fat added in cooking                                                                            | 3000_Vegetables | 79 | 77 | 2  | 2 | 3.5 | B |
| 75221060 | Onions, green, cooked, NS as to form, fat added in cooking                                                                                     | 3000_Vegetables | 79 | 77 | 2  | 2 | 3.5 | B |
| 75223024 | Peas, cowpeas, field peas, or blackeye peas, not dried, cooked, NS as to form, made with oil                                                   | 3000_Vegetables | 79 | 76 | 3  | 1 | 5   | A |
| 75223030 | Peas, cowpeas, field peas, or blackeye peas, not dried, cooked, from frozen, made with oil                                                     | 3000_Vegetables | 79 | 76 | 3  | 1 | 5   | A |
| 75224000 | Green peas, cooked, from restaurant                                                                                                            | 3000_Vegetables | 79 | 76 | 3  | 1 | 5   | A |
| 75223012 | Peas, cowpeas, field peas, or blackeye peas, not dried, cooked, from frozen, fat not added in cooking                                          | 3000_Vegetables | 79 | 74 | 5  | 1 | 5   | A |
| 75224044 | Green peas, fresh, cooked with butter or margarine                                                                                             | 3000_Vegetables | 79 | 74 | 5  | 1 | 5   | A |
| 75223010 | Peas, cowpeas, field peas, or blackeye peas, not dried, cooked, NS as to form, fat not added in cooking                                        | 3000_Vegetables | 79 | 73 | 6  | 1 | 5   | A |
| 75221012 | Onions, cooked, from frozen, fat not added in cooking                                                                                          | 3000_Vegetables | 79 | 72 | 7  | 1 | 3.5 | A |
| 75224022 | Green peas, frozen, cooked, no added fat                                                                                                       | 3000_Vegetables | 79 | 72 | 7  | 1 | 5   | A |
| 72133199 | Sweet potato leaves, squash leaves, pumpkin leaves, chrysanthemum leaves, bean leaves, or swamp cabbage, cooked, NS as to fat added in cooking | 3000_Vegetables | 78 | 80 | -2 | 2 | 3.5 | C |
| 73111233 | Peas and carrots, cooked, from canned, made with oil                                                                                           | 3000_Vegetables | 78 | 79 | -1 | 3 | 4   | A |
| 72119225 | Kale, cooked, NS as to form, made with butter                                                                                                  | 3000_Vegetables | 78 | 78 | 0  | 1 | 4   | A |
| 73201000 | Pumpkin, cooked, NS as to form, NS as to fat added in cooking                                                                                  | 3000_Vegetables | 78 | 78 | 0  | 2 | 3.5 | B |
| 74504149 | Tomato and celery, cooked, fat added in cooking                                                                                                | 3000_Vegetables | 78 | 78 | 0  | 2 | 3.5 | A |
| 75317011 | Vegetables, stew type, cooked, made with oil                                                                                                   | 3000_Vegetables | 78 | 78 | 0  | 1 | 4   | A |
| 73201001 | Pumpkin, cooked, from fresh, NS as to fat added in cooking                                                                                     | 3000_Vegetables | 78 | 77 | 1  | 2 | 3.5 | B |
| 73201002 | Pumpkin, cooked, from frozen, NS as to fat added in cooking                                                                                    | 3000_Vegetables | 78 | 77 | 1  | 2 | 3.5 | B |
| 73201021 | Pumpkin, cooked, from fresh, fat added in cooking, NS as to type of fat                                                                        | 3000_Vegetables | 78 | 77 | 1  | 2 | 3.5 | B |
| 73201022 | Pumpkin, cooked, from frozen, fat added in cooking, NS as to type of fat                                                                       | 3000_Vegetables | 78 | 77 | 1  | 2 | 3.5 | B |
| 75212000 | Cabbage, red, cooked, NS as to fat added in cooking                                                                                            | 3000_Vegetables | 78 | 76 | 2  | 2 | 4   | A |



|          |                                                                                                                          |                 |    |    |    |   |     |   |
|----------|--------------------------------------------------------------------------------------------------------------------------|-----------------|----|----|----|---|-----|---|
| 75340000 | Vegetable combinations, Asian style, broccoli, green pepper, water chestnut, etc., cooked, NS as to fat added in cooking | 3000_Vegetables | 78 | 76 | 2  | 2 | 4   | A |
| 73111213 | Peas and carrots, canned, cooked, no added fat                                                                           | 3000_Vegetables | 78 | 75 | 3  | 3 | 4.5 | A |
| 75224040 | Peas, green, cooked, NS as to form, made with oil                                                                        | 3000_Vegetables | 78 | 75 | 3  | 1 | 4.5 | B |
| 75204027 | Beans, lima, immature, cooked, from fresh, made with oil                                                                 | 3000_Vegetables | 78 | 74 | 4  | 1 | 5   | A |
| 71103210 | White potato, boiled, without peel, canned, low sodium, fat not added in cooking                                         | 3000_Vegetables | 78 | 73 | 5  | 1 | 4.5 | A |
| 74502010 | Tomato and lima beans, cooked, fat not added cooking                                                                     | 3000_Vegetables | 78 | 73 | 5  | 1 | 4   | A |
| 75311026 | Mixed vegetables, cooked, NS as to form, made with margarine                                                             | 3000_Vegetables | 78 | 73 | 5  | 2 | 4.5 | A |
| 75311029 | Mixed vegetables, cooked, from frozen, made with margarine                                                               | 3000_Vegetables | 78 | 73 | 5  | 2 | 4.5 | A |
| 75200110 | Vegetables, NS as to type, cooked, fat not added in cooking                                                              | 3000_Vegetables | 78 | 70 | 8  | 1 | 4.5 | A |
| 75311010 | Mixed vegetables, cooked, NS as to form, fat not added in cooking                                                        | 3000_Vegetables | 78 | 70 | 8  | 1 | 4.5 | A |
| 75217021 | Eggplant, cooked, made with oil                                                                                          | 3000_Vegetables | 77 | 79 | -2 | 2 | 4   | A |
| 73410340 | Sweet potato fries, from fresh, baked                                                                                    | 3000_Vegetables | 77 | 78 | -1 | 2 | 3.5 | C |
| 74201000 | Tomatoes, NS as to form, cooked                                                                                          | 3000_Vegetables | 77 | 78 | -1 | 2 | 4   | A |
| 72119234 | Kale, cooked, from canned, made with butter                                                                              | 3000_Vegetables | 77 | 77 | 0  | 1 | 4   | A |
| 73102190 | Carrots, cooked, from restaurant                                                                                         | 3000_Vegetables | 77 | 77 | 0  | 2 | 4   | A |
| 73405021 | Sweet potato, boiled, made with oil                                                                                      | 3000_Vegetables | 77 | 77 | 0  | 1 | 3.5 | B |
| 74505023 | Tomato with corn and okra, cooked, made with margarine                                                                   | 3000_Vegetables | 77 | 77 | 0  | 3 | 4   | B |
| 75215000 | Celery, cooked, NS as to fat added in cooking                                                                            | 3000_Vegetables | 77 | 77 | 0  | 2 | 4   | A |
| 75228020 | Rutabaga, cooked                                                                                                         | 3000_Vegetables | 77 | 77 | 0  | 2 | 4   | A |
| 75221160 | Palm hearts, cooked                                                                                                      | 3000_Vegetables | 77 | 76 | 1  | 1 | 4   | C |
| 73102220 | Carrots, NS as to form, cooked                                                                                           | 3000_Vegetables | 77 | 75 | 2  | 2 | 4   | A |
| 73301000 | Squash, winter type, mashed, NS as to fat or sugar added in cooking                                                      | 3000_Vegetables | 77 | 75 | 2  | 1 | 3.5 | A |
| 73301020 | Squash, winter type, mashed, fat added in cooking, no sugar added in cooking                                             | 3000_Vegetables | 77 | 75 | 2  | 1 | 3.5 | A |
| 73303000 | Squash, winter type, baked, NS as to fat or sugar added in cooking                                                       | 3000_Vegetables | 77 | 75 | 2  | 1 | 3.5 | B |
| 75221014 | Onions, cooked, NS as to form, made with oil                                                                             | 3000_Vegetables | 77 | 75 | 2  | 1 | 3.5 | A |
| 73102225 | Carrots, frozen, cooked with butter or margarine                                                                         | 3000_Vegetables | 77 | 74 | 3  | 2 | 4   | A |
| 75220032 | Okra, cooked, from frozen, made with butter                                                                              | 3000_Vegetables | 77 | 74 | 3  | 1 | 4   | A |
| 75223027 | Peas, cowpeas, field peas, or blackeye peas, not dried, cooked, from fresh, made with oil                                | 3000_Vegetables | 77 | 74 | 3  | 1 | 4.5 | A |
| 74504022 | Tomato and okra, cooked, made with butter                                                                                | 3000_Vegetables | 77 | 73 | 4  | 2 | 3.5 | B |
| 75209031 | Brussels sprouts, cooked, NS as to form, made with butter                                                                | 3000_Vegetables | 77 | 73 | 4  | 1 | 4.5 | A |
| 75209051 | Brussels sprouts, cooked, from frozen, made with butter                                                                  | 3000_Vegetables | 77 | 73 | 4  | 1 | 4.5 | A |
| 71980100 | Poi                                                                                                                      | 3000_Vegetables | 77 | 72 | 5  | 1 | 4   | A |
| 75235000 | Water Chestnut                                                                                                           | 3000_Vegetables | 77 | 71 | 6  | 1 | 5   | A |
| 73102229 | Carrots, cooked, from canned, made with margarine                                                                        | 3000_Vegetables | 76 | 82 | -6 | 3 | 4   | B |
| 75233020 | Summer squash, yellow or green, NS as to form, cooked                                                                    | 3000_Vegetables | 76 | 79 | -3 | 2 | 4   | A |
| 75205030 | Green beans, NS as to form, cooked                                                                                       | 3000_Vegetables | 76 | 77 | -1 | 2 | 4.5 | A |
| 75209041 | Brussels sprouts, cooked, from fresh, made with butter                                                                   | 3000_Vegetables | 76 | 76 | 0  | 1 | 4   | B |

|          |                                                                                                           |                 |    |    |    |   |     |   |
|----------|-----------------------------------------------------------------------------------------------------------|-----------------|----|----|----|---|-----|---|
| 75219023 | Mushrooms, canned, cooked                                                                                 | 3000_Vegetables | 76 | 76 | 0  | 3 | 4   | C |
| 75307001 | Green peppers and onions, cooked, made with oil                                                           | 3000_Vegetables | 76 | 76 | 0  | 1 | 4   | B |
| 75208124 | Beets, cooked, from fresh, made with oil                                                                  | 3000_Vegetables | 76 | 75 | 1  | 1 | 3.5 | A |
| 75221023 | Onions, cooked, from frozen, made with oil                                                                | 3000_Vegetables | 76 | 75 | 1  | 1 | 3.5 | A |
| 75440400 | Pakora                                                                                                    | 3000_Vegetables | 76 | 74 | 2  | 1 | 4   | B |
| 73407010 | Sweet potato, canned without syrup                                                                        | 3000_Vegetables | 76 | 73 | 3  | 1 | 4   | A |
| 75219031 | Mushrooms, cooked, NS as to form, made with butter                                                        | 3000_Vegetables | 76 | 73 | 3  | 1 | 4   | C |
| 75223022 | Blackeyed peas, from frozen                                                                               | 3000_Vegetables | 76 | 73 | 3  | 1 | 5   | A |
| 73102218 | Carrots, fresh, cooked with butter or margarine                                                           | 3000_Vegetables | 76 | 72 | 4  | 2 | 4   | A |
| 75205048 | Green beans, frozen, cooked with butter or margarine                                                      | 3000_Vegetables | 76 | 72 | 4  | 2 | 4.5 | A |
| 75214025 | Cauliflower, cooked, NS as to form, made with butter                                                      | 3000_Vegetables | 76 | 72 | 4  | 1 | 4   | A |
| 75215100 | Fennel bulb, cooked, NS as to fat added in cooking                                                        | 3000_Vegetables | 76 | 72 | 4  | 2 | 4   | A |
| 75311020 | Classic mixed vegetables, NS as to form, cooked                                                           | 3000_Vegetables | 76 | 72 | 4  | 1 | 4.5 | A |
| 75311022 | Classic mixed vegetables, frozen, cooked, fat added, NS as to fat type                                    | 3000_Vegetables | 76 | 72 | 4  | 1 | 4.5 | A |
| 75317020 | Vegetables, stew type, cooked, no added fat                                                               | 3000_Vegetables | 76 | 72 | 4  | 1 | 4   | B |
| 73111201 | Peas and carrots, cooked, from fresh, NS as to fat added in cooking                                       | 3000_Vegetables | 76 | 71 | 5  | 1 | 4   | A |
| 75224048 | Peas, green, cooked, from frozen, made with margarine                                                     | 3000_Vegetables | 76 | 71 | 5  | 2 | 4.5 | B |
| 75223011 | Peas, cowpeas, field peas, or blackeye peas, not dried, cooked, from fresh, fat not added in cooking      | 3000_Vegetables | 76 | 69 | 7  | 1 | 4.5 | A |
| 75315110 | Peas and onions, cooked, fat not added in cooking                                                         | 3000_Vegetables | 76 | 69 | 7  | 1 | 4   | B |
| 75224020 | Peas, green, cooked, NS as to form, fat not added in cooking                                              | 3000_Vegetables | 76 | 68 | 8  | 1 | 5   | A |
| 75534500 | Tsukemono, Japanese pickles                                                                               | 3000_Vegetables | 75 | 78 | -3 | 4 | 3.5 | B |
| 75233001 | Squash, summer, yellow or green, cooked, from fresh, NS as to fat added in cooking                        | 3000_Vegetables | 75 | 77 | -2 | 2 | 4   | A |
| 75311032 | Mixed vegetables, cooked, from canned, made with margarine                                                | 3000_Vegetables | 75 | 77 | -2 | 3 | 4   | A |
| 75205033 | Green beans, canned, cooked, fat added, NS as to fat type                                                 | 3000_Vegetables | 75 | 76 | -1 | 2 | 4   | A |
| 75218400 | Leek, cooked                                                                                              | 3000_Vegetables | 75 | 76 | -1 | 1 | 4   | B |
| 75311030 | Classic mixed vegetables, canned, cooked with oil                                                         | 3000_Vegetables | 75 | 76 | -1 | 3 | 4.5 | A |
| 73402000 | Sweet potato, baked, peel eaten, NS as to fat                                                             | 3000_Vegetables | 75 | 74 | 1  | 1 | 3.5 | B |
| 73402020 | Sweet potato, baked, peel eaten, fat added, NS as to fat type                                             | 3000_Vegetables | 75 | 74 | 1  | 1 | 3.5 | B |
| 73403000 | Sweet potato, baked, peel not eaten, NS as to fat                                                         | 3000_Vegetables | 75 | 74 | 1  | 1 | 3.5 | B |
| 73403020 | Sweet potato, baked, peel not eaten, fat added, NS as to fat type                                         | 3000_Vegetables | 75 | 74 | 1  | 1 | 3.5 | B |
| 75310990 | Classic mixed vegetables, cooked, from restaurant                                                         | 3000_Vegetables | 75 | 74 | 1  | 2 | 4   | B |
| 75218499 | Lotus root, cooked, NS as to fat added in cooking                                                         | 3000_Vegetables | 75 | 73 | 2  | 1 | 4.5 | C |
| 75330151 | Vegetable combination, excluding carrots, broccoli, and dark-green leafy; cooked, no sauce, made with oil | 3000_Vegetables | 75 | 73 | 2  | 1 | 4   | A |
| 75223033 | Peas, cowpeas, field peas, or blackeye peas, not dried, cooked, from canned, made with oil                | 3000_Vegetables | 75 | 71 | 4  | 1 | 5   | A |
| 75231027 | Snowpea, cooked, from fresh, made with butter                                                             | 3000_Vegetables | 75 | 71 | 4  | 1 | 4   | A |
| 73201034 | Pumpkin, cooked, from canned, made with butter                                                            | 3000_Vegetables | 75 | 70 | 5  | 1 | 3.5 | B |
| 75201000 | Artichoke, cooked, NS as to form, NS as to fat added in cooking                                           | 3000_Vegetables | 75 | 69 | 6  | 1 | 4   | A |

|          |                                                                                                                      |                 |    |    |    |   |     |   |
|----------|----------------------------------------------------------------------------------------------------------------------|-----------------|----|----|----|---|-----|---|
| 75204011 | Beans, lima, immature, cooked, from fresh, fat not added in cooking                                                  | 3000_Vegetables | 75 | 69 | 6  | 1 | 5   | A |
| 75225010 | Pigeon peas, cooked, NS as to form, fat not added in cooking                                                         | 3000_Vegetables | 75 | 69 | 6  | 1 | 5   | A |
| 75225011 | Pigeon peas, cooked, from fresh, fat not added in cooking                                                            | 3000_Vegetables | 75 | 69 | 6  | 1 | 5   | A |
| 75225013 | Pigeon peas, cooked, from canned, fat not added in cooking                                                           | 3000_Vegetables | 75 | 69 | 6  | 1 | 5   | A |
| 75221010 | Onions, cooked, NS as to form, fat not added in cooking                                                              | 3000_Vegetables | 75 | 67 | 8  | 1 | 3.5 | A |
| 73410330 | Sweet potato fries, from fresh, fried                                                                                | 3000_Vegetables | 74 | 77 | -3 | 2 | 3.5 | C |
| 75216721 | Cucumber, cooked, made with oil                                                                                      | 3000_Vegetables | 74 | 77 | -3 | 2 | 3.5 | A |
| 75233028 | Summer squash, yellow or green, fresh, cooked with butter or margarine                                               | 3000_Vegetables | 74 | 76 | -2 | 2 | 4   | A |
| 72203090 | Broccoli, chinese, cooked, NS as to form, made with butter                                                           | 3000_Vegetables | 74 | 75 | -1 | 2 | 4   | B |
| 72203130 | Broccoli, chinese, cooked, from fresh, made with butter                                                              | 3000_Vegetables | 74 | 75 | -1 | 2 | 4   | B |
| 72203170 | Broccoli, chinese, cooked, from frozen, made with butter                                                             | 3000_Vegetables | 74 | 75 | -1 | 2 | 4   | B |
| 75233023 | Summer squash, yellow or green, canned, cooked, fat added, NS as to fat type                                         | 3000_Vegetables | 74 | 75 | -1 | 2 | 3.5 | A |
| 75208110 | Beets, canned, reduced sodium, cooked                                                                                | 3000_Vegetables | 74 | 74 | 0  | 2 | 4   | A |
| 73111223 | Peas and carrots, canned, cooked, fat added                                                                          | 3000_Vegetables | 74 | 73 | 1  | 3 | 4.5 | A |
| 74504100 | Tomato and onion, cooked, NS as to fat added in cooking                                                              | 3000_Vegetables | 74 | 73 | 1  | 2 | 3.5 | A |
| 74504120 | Tomato and onion, cooked, fat added in cooking, NS as to type of fat                                                 | 3000_Vegetables | 74 | 73 | 1  | 2 | 3.5 | A |
| 75221017 | Onions, cooked, from fresh, made with oil                                                                            | 3000_Vegetables | 74 | 73 | 1  | 1 | 3.5 | A |
| 75233000 | Squash, summer, yellow or green, cooked, NS as to form, NS as to fat added in cooking                                | 3000_Vegetables | 74 | 73 | 1  | 2 | 4   | A |
| 75233002 | Squash, summer, yellow or green, cooked, from frozen, NS as to fat added in cooking                                  | 3000_Vegetables | 74 | 73 | 1  | 2 | 4   | A |
| 75206021 | Beans, string, yellow, cooked, from fresh, fat added in cooking, NS as to type of fat                                | 3000_Vegetables | 74 | 72 | 2  | 2 | 4.5 | C |
| 75311013 | Classic mixed vegetables, canned, cooked, no added fat                                                               | 3000_Vegetables | 74 | 71 | 3  | 3 | 4.5 | A |
| 75330122 | Vegetable combination, including carrots, broccoli, and/or dark-green leafy; cooked, no sauce, made with butter      | 3000_Vegetables | 74 | 71 | 3  | 1 | 4   | A |
| 73102200 | Carrots, cooked, NS as to form, NS as to fat added in cooking                                                        | 3000_Vegetables | 74 | 70 | 4  | 2 | 4   | A |
| 73102201 | Carrots, cooked, from fresh, NS as to fat added in cooking                                                           | 3000_Vegetables | 74 | 70 | 4  | 2 | 4   | A |
| 73102202 | Carrots, cooked, from frozen, NS as to fat added in cooking                                                          | 3000_Vegetables | 74 | 70 | 4  | 2 | 4   | A |
| 75224032 | Green peas, frozen, cooked, fat added, NS as to fat type                                                             | 3000_Vegetables | 74 | 70 | 4  | 1 | 5   | A |
| 75221011 | Onions, cooked, no added fat                                                                                         | 3000_Vegetables | 74 | 68 | 6  | 1 | 4   | A |
| 75224011 | Peas, green, cooked, from fresh, NS as to fat added in cooking                                                       | 3000_Vegetables | 74 | 68 | 6  | 1 | 4.5 | B |
| 75221032 | Onions, pearl, cooked, from frozen                                                                                   | 3000_Vegetables | 74 | 67 | 7  | 1 | 4   | A |
| 75330140 | Vegetable combination, excluding carrots, broccoli, and dark-green leafy; cooked, no sauce, fat not added in cooking | 3000_Vegetables | 74 | 67 | 7  | 1 | 4   | A |
| 75214001 | Cauliflower, cooked, from fresh, NS as to fat added in cooking                                                       | 3000_Vegetables | 73 | 75 | -2 | 2 | 4   | C |
| 75234021 | Turnip, cooked                                                                                                       | 3000_Vegetables | 73 | 72 | 1  | 2 | 4   | A |
| 73405100 | Sweet potato, boiled with peel, peel not eaten, NS as to fat added in cooking                                        | 3000_Vegetables | 73 | 71 | 2  | 2 | 3.5 | C |
| 73405120 | Sweet potato, boiled with peel, peel not eaten, fat added in cooking                                                 | 3000_Vegetables | 73 | 71 | 2  | 2 | 3.5 | C |
| 75302511 | Beans, string, green, and potatoes, cooked, made with oil                                                            | 3000_Vegetables | 73 | 71 | 2  | 1 | 4   | A |

|          |                                                                                                                 |                 |    |    |    |   |     |   |
|----------|-----------------------------------------------------------------------------------------------------------------|-----------------|----|----|----|---|-----|---|
| 73111200 | Peas and carrots, cooked, NS as to form, NS as to fat added in cooking                                          | 3000_Vegetables | 73 | 69 | 4  | 1 | 4.5 | A |
| 73111202 | Peas and carrots, cooked, from frozen, NS as to fat added in cooking                                            | 3000_Vegetables | 73 | 69 | 4  | 1 | 4.5 | A |
| 75208013 | Beets, canned, cooked, no added fat                                                                             | 3000_Vegetables | 73 | 69 | 4  | 3 | 3.5 | A |
| 75224132 | Green peas, canned, reduced sodium, cooked with butter or margarine                                             | 3000_Vegetables | 73 | 69 | 4  | 1 | 5   | B |
| 75223013 | Peas, cowpeas, field peas, or blackeye peas, not dried, cooked, from canned, fat not added in cooking           | 3000_Vegetables | 73 | 66 | 7  | 1 | 5   | A |
| 75315300 | Peas and potatoes, cooked, fat not added in cooking                                                             | 3000_Vegetables | 73 | 66 | 7  | 1 | 4.5 | C |
| 73111235 | Peas and carrots, cooked, from canned, made with margarine                                                      | 3000_Vegetables | 72 | 73 | -1 | 3 | 4   | A |
| 75143200 | Lettuce, salad with cheese, tomato and/or carrots, with or without other vegetables, no dressing                | 3000_Vegetables | 72 | 73 | -1 | 3 | 4   | A |
| 73102228 | Carrots, canned, cooked with butter or margarine                                                                | 3000_Vegetables | 72 | 72 | 0  | 3 | 4   | B |
| 75233031 | Summer squash, yellow or green, frozen, cooked with butter or margarine                                         | 3000_Vegetables | 72 | 72 | 0  | 2 | 4   | A |
| 75316020 | Squash, summer, yellow or green, and onions, cooked, fat added in cooking                                       | 3000_Vegetables | 72 | 72 | 0  | 2 | 3.5 | A |
| 73405023 | Sweet potato, boiled, made with margarine                                                                       | 3000_Vegetables | 72 | 71 | 1  | 2 | 3.5 | B |
| 75307003 | Green peppers and onions, cooked, made with margarine                                                           | 3000_Vegetables | 72 | 71 | 1  | 2 | 4   | B |
| 75211010 | Cabbage, green, cooked, NS as to fat added in cooking                                                           | 3000_Vegetables | 72 | 70 | 2  | 2 | 4   | A |
| 73201025 | Pumpkin, cooked, NS as to form, made with butter                                                                | 3000_Vegetables | 72 | 69 | 3  | 1 | 3.5 | B |
| 73201028 | Pumpkin, cooked, from fresh, made with butter                                                                   | 3000_Vegetables | 72 | 69 | 3  | 1 | 3.5 | B |
| 73201031 | Pumpkin, cooked, from frozen, made with butter                                                                  | 3000_Vegetables | 72 | 69 | 3  | 1 | 3.5 | B |
| 74503010 | Tomato and corn, cooked, fat not added in cooking                                                               | 3000_Vegetables | 72 | 69 | 3  | 3 | 4   | B |
| 75204980 | Beans, string, cooked, NS as to form, NS as to color, fat added in cooking, NS as to type of fat                | 3000_Vegetables | 72 | 69 | 3  | 2 | 4   | A |
| 75205000 | Beans, string, cooked, NS as to form, NS as to color, NS as to fat added in cooking                             | 3000_Vegetables | 72 | 69 | 3  | 2 | 4   | A |
| 75205010 | Beans, string, green, cooked, NS as to form, NS as to fat added in cooking                                      | 3000_Vegetables | 72 | 69 | 3  | 2 | 4   | A |
| 75330153 | Vegetable combination, excluding carrots, broccoli, and dark-green leafy; cooked, no sauce, made with margarine | 3000_Vegetables | 72 | 69 | 3  | 2 | 4   | A |
| 71104010 | White potato, roasted, fat not added in cooking                                                                 | 3000_Vegetables | 72 | 68 | 4  | 1 | 4.5 | B |
| 75109600 | Corn, raw                                                                                                       | 3000_Vegetables | 72 | 68 | 4  | 1 | 5   | B |
| 75208021 | Beets, fresh, cooked, fat added                                                                                 | 3000_Vegetables | 72 | 68 | 4  | 1 | 4   | B |
| 73405010 | Sweet potato, boiled, no added fat                                                                              | 3000_Vegetables | 72 | 66 | 6  | 1 | 3.5 | B |
| 75208010 | Beets, cooked, NS as to form, fat not added in cooking                                                          | 3000_Vegetables | 72 | 65 | 7  | 1 | 4   | A |
| 75503030 | Cucumber pickles, sour                                                                                          | 3000_Vegetables | 71 | 76 | -5 | 4 | 2.5 | D |
| 71104070 | Potato, roasted, from fresh, peel eaten, made with oil                                                          | 3000_Vegetables | 71 | 70 | 1  | 1 | 4.5 | B |
| 71704000 | Stewed potatoes with tomatoes                                                                                   | 3000_Vegetables | 71 | 70 | 1  | 1 | 4.5 | B |
| 73410110 | Sweet potato, fried                                                                                             | 3000_Vegetables | 71 | 70 | 1  | 1 | 3.5 | C |
| 71961010 | Celeriac, cooked                                                                                                | 3000_Vegetables | 71 | 69 | 2  | 2 | 4   | B |
| 74505000 | Tomato with corn and okra, cooked, NS as to fat added in cooking                                                | 3000_Vegetables | 71 | 68 | 3  | 2 | 4   | B |
| 74505020 | Tomato with corn and okra, cooked, fat added in cooking, NS as to type of fat                                   | 3000_Vegetables | 71 | 68 | 3  | 2 | 4   | B |

|          |                                                                                                              |                 |    |    |    |   |     |   |
|----------|--------------------------------------------------------------------------------------------------------------|-----------------|----|----|----|---|-----|---|
| 75218501 | Lotus root, cooked                                                                                           | 3000_Vegetables | 71 | 68 | 3  | 1 | 4.5 | B |
| 73303022 | Squash, winter type, baked, no sugar added in cooking, made with butter                                      | 3000_Vegetables | 71 | 67 | 4  | 1 | 3.5 | B |
| 75204982 | Beans, string, cooked, from frozen, NS as to color, fat added in cooking, NS as to type of fat               | 3000_Vegetables | 71 | 67 | 4  | 2 | 4   | A |
| 75205012 | Beans, string, green, cooked, from frozen, NS as to fat added in cooking                                     | 3000_Vegetables | 71 | 67 | 4  | 2 | 4   | A |
| 75206000 | Beans, string, yellow, cooked, NS as to form, NS as to fat added in cooking                                  | 3000_Vegetables | 71 | 67 | 4  | 2 | 4   | A |
| 75206010 | Beans, string, yellow, cooked, NS as to form, fat not added in cooking                                       | 3000_Vegetables | 71 | 67 | 4  | 2 | 4   | A |
| 75206022 | Beans, string, yellow, cooked, from frozen, fat added in cooking, NS as to type of fat                       | 3000_Vegetables | 71 | 67 | 4  | 2 | 4   | B |
| 75204030 | Beans, lima, immature, cooked, from frozen, made with oil                                                    | 3000_Vegetables | 71 | 66 | 5  | 1 | 4.5 | A |
| 75215509 | Christophine, cooked, NS as to fat added in cooking                                                          | 3000_Vegetables | 71 | 66 | 5  | 2 | 4   | A |
| 75223023 | Blackeyed peas, from canned                                                                                  | 3000_Vegetables | 71 | 66 | 5  | 1 | 5   | A |
| 75224030 | Green peas, NS as to form, cooked                                                                            | 3000_Vegetables | 71 | 66 | 5  | 1 | 5   | A |
| 75315023 | Peas and corn, cooked, made with margarine                                                                   | 3000_Vegetables | 71 | 66 | 5  | 1 | 4.5 | C |
| 73421000 | Sweet potato, yellow, Puerto Rican, cooked                                                                   | 3000_Vegetables | 71 | 65 | 6  | 1 | 4   | B |
| 75221031 | Onions, pearl, cooked, from fresh                                                                            | 3000_Vegetables | 71 | 65 | 6  | 1 | 4   | B |
| 75221033 | Onions, pearl, cooked, from canned                                                                           | 3000_Vegetables | 71 | 65 | 6  | 1 | 4   | B |
| 75302050 | Beans, string, green, and potatoes, cooked, fat not added in cooking                                         | 3000_Vegetables | 71 | 64 | 7  | 1 | 4.5 | A |
| 75222010 | Parsnips, cooked, fat not added in cooking                                                                   | 3000_Vegetables | 71 | 63 | 8  | 1 | 4.5 | B |
| 75507000 | Okra, pickled                                                                                                | 3000_Vegetables | 70 | 73 | -3 | 3 | 3   | C |
| 73102203 | Carrots, cooked, from canned, NS as to fat added in cooking                                                  | 3000_Vegetables | 70 | 71 | -1 | 3 | 4   | A |
| 75214023 | Cauliflower, cooked, from canned, fat added in cooking, NS as to type of fat                                 | 3000_Vegetables | 70 | 71 | -1 | 2 | 4   | A |
| 71104000 | White potato, roasted, NS as to fat added in cooking                                                         | 3000_Vegetables | 70 | 70 | 0  | 1 | 4.5 | C |
| 71104020 | White potato, roasted, fat added in cooking                                                                  | 3000_Vegetables | 70 | 70 | 0  | 1 | 4.5 | C |
| 75221019 | Onions, cooked, from fresh, made with margarine                                                              | 3000_Vegetables | 70 | 68 | 2  | 2 | 3.5 | B |
| 75317010 | Vegetables, stew type, cooked, fat added                                                                     | 3000_Vegetables | 70 | 68 | 2  | 1 | 4   | B |
| 71905000 | Ripe plantain, raw                                                                                           | 3000_Vegetables | 70 | 67 | 3  | 1 | 5   | C |
| 75204981 | Beans, string, cooked, from fresh, NS as to color, fat added in cooking, NS as to type of fat                | 3000_Vegetables | 70 | 67 | 3  | 2 | 4.5 | A |
| 75205001 | Beans, string, cooked, from fresh, NS as to color, NS as to fat added in cooking                             | 3000_Vegetables | 70 | 67 | 3  | 2 | 4.5 | A |
| 75205011 | Beans, string, green, cooked, from fresh, NS as to fat added in cooking                                      | 3000_Vegetables | 70 | 67 | 3  | 2 | 4.5 | A |
| 75302200 | Beans, string, green, with onions, NS as to fat added in cooking                                             | 3000_Vegetables | 70 | 67 | 3  | 2 | 4   | A |
| 75302210 | Beans, string, green, with onions, cooked, fat added in cooking, NS as to type of fat                        | 3000_Vegetables | 70 | 67 | 3  | 2 | 4   | A |
| 75222020 | Parsnips, cooked                                                                                             | 3000_Vegetables | 70 | 65 | 5  | 1 | 4.5 | A |
| 75223000 | Peas, cowpeas, field peas, or blackeye peas, not dried, cooked, NS as to form, NS as to fat added in cooking | 3000_Vegetables | 70 | 64 | 6  | 1 | 5   | A |
| 75223001 | Peas, cowpeas, field peas, or blackeye peas, not dried, cooked, from fresh, NS as to fat added in cooking    | 3000_Vegetables | 70 | 64 | 6  | 1 | 5   | A |

|          |                                                                                                                           |                 |    |    |    |   |     |   |
|----------|---------------------------------------------------------------------------------------------------------------------------|-----------------|----|----|----|---|-----|---|
| 75223002 | Peas, cowpeas, field peas, or blackeye peas, not dried, cooked, from frozen, NS as to fat added in cooking                | 3000_Vegetables | 70 | 64 | 6  | 1 | 5   | A |
| 75223020 | Peas, cowpeas, field peas, or blackeye peas, not dried, cooked, NS as to form, fat added in cooking, NS as to type of fat | 3000_Vegetables | 70 | 64 | 6  | 1 | 5   | A |
| 75224023 | Green peas, canned, cooked, no added fat                                                                                  | 3000_Vegetables | 70 | 64 | 6  | 3 | 5   | A |
| 75218500 | Lotus root, cooked, fat not added in cooking                                                                              | 3000_Vegetables | 70 | 63 | 7  | 1 | 4.5 | B |
| 75204012 | Lima beans, from frozen, no added fat                                                                                     | 3000_Vegetables | 70 | 62 | 8  | 1 | 5   | A |
| 75216720 | Cucumber, cooked                                                                                                          | 3000_Vegetables | 69 | 71 | -2 | 2 | 4   | A |
| 71104130 | Potato, roasted, from fresh, peel not eaten, made with oil                                                                | 3000_Vegetables | 69 | 69 | 0  | 1 | 4.5 | B |
| 75235750 | Winter melon, cooked                                                                                                      | 3000_Vegetables | 69 | 69 | 0  | 2 | 4   | A |
| 71103135 | Potato, boiled, from fresh, peel eaten, made with oil                                                                     | 3000_Vegetables | 69 | 68 | 1  | 1 | 4.5 | B |
| 75226040 | Peppers, red, cooked, NS as to fat added in cooking                                                                       | 3000_Vegetables | 69 | 68 | 1  | 2 | 4   | A |
| 75311023 | Classic mixed vegetables, canned, cooked, fat added, NS as to fat type                                                    | 3000_Vegetables | 69 | 68 | 1  | 3 | 4.5 | A |
| 73405000 | Sweet potato, boiled, NS as to fat                                                                                        | 3000_Vegetables | 69 | 67 | 2  | 1 | 3.5 | C |
| 73405020 | Sweet potato, boiled, fat added, NS as to fat type                                                                        | 3000_Vegetables | 69 | 67 | 2  | 1 | 3.5 | C |
| 75221030 | Onions, pearl, cooked                                                                                                     | 3000_Vegetables | 69 | 67 | 2  | 2 | 4   | A |
| 75315200 | Peas and mushrooms, cooked, NS as to fat added in cooking                                                                 | 3000_Vegetables | 69 | 64 | 5  | 1 | 4   | C |
| 75315215 | Peas and mushrooms, cooked, fat added in cooking, NS as to type of fat                                                    | 3000_Vegetables | 69 | 64 | 5  | 1 | 4   | C |
| 73405110 | Sweet potato, boiled with peel, peel not eaten, fat not added in cooking                                                  | 3000_Vegetables | 69 | 63 | 6  | 1 | 3.5 | B |
| 75302050 | Beans, string, green, and potatoes, cooked, fat not added in cooking                                                      | 3000_Vegetables | 69 | 63 | 6  | 1 | 4.5 | A |
| 75311028 | Classic mixed vegetables, frozen, cooked with butter or margarine                                                         | 3000_Vegetables | 69 | 62 | 7  | 1 | 4.5 | A |
| 75315010 | Peas and corn, cooked, no added fat                                                                                       | 3000_Vegetables | 69 | 62 | 7  | 1 | 4.5 | A |
| 75220049 | Lettuce, cooked, NS as to fat added in cooking                                                                            | 3000_Vegetables | 68 | 69 | -1 | 2 | 4   | A |
| 71103030 | Potato, boiled, from fresh, peel not eaten, made with oil                                                                 | 3000_Vegetables | 68 | 68 | 0  | 1 | 4.5 | B |
| 75204983 | Beans, string, cooked, from canned, NS as to color, fat added in cooking, NS as to type of fat                            | 3000_Vegetables | 68 | 68 | 0  | 2 | 4   | A |
| 75205003 | Beans, string, cooked, from canned, NS as to color, NS as to fat added in cooking                                         | 3000_Vegetables | 68 | 68 | 0  | 2 | 4   | A |
| 75205013 | Beans, string, green, cooked, from canned, NS as to fat added in cooking                                                  | 3000_Vegetables | 68 | 68 | 0  | 2 | 4   | A |
| 75315999 | Squash, summer, yellow or green, and onions, cooked, NS as to fat added in cooking                                        | 3000_Vegetables | 68 | 67 | 1  | 2 | 3.5 | A |
| 75510030 | Olives, stuffed                                                                                                           | 3000_Vegetables | 68 | 67 | 1  | 3 | 2.5 | D |
| 71703990 | Stewed potatoes                                                                                                           | 3000_Vegetables | 68 | 66 | 2  | 1 | 4.5 | B |
| 75221021 | Onions, cooked, fat added                                                                                                 | 3000_Vegetables | 68 | 66 | 2  | 2 | 3.5 | A |
| 75302513 | Beans, string, green, and potatoes, cooked, made with margarine                                                           | 3000_Vegetables | 68 | 66 | 2  | 2 | 4   | A |
| 75208120 | Beets, canned, low sodium, fat added in cooking, NS as to type of fat                                                     | 3000_Vegetables | 68 | 65 | 3  | 2 | 4   | A |
| 71901010 | Green plantains, boiled                                                                                                   | 3000_Vegetables | 68 | 64 | 4  | 1 | 4   | C |
| 73407050 | Sweet potato, canned, no added fat                                                                                        | 3000_Vegetables | 68 | 63 | 5  | 1 | 3.5 | B |
| 75204032 | Beans, lima, immature, cooked, from frozen, made with margarine                                                           | 3000_Vegetables | 68 | 62 | 6  | 1 | 4.5 | A |

|          |                                                                               |                 |    |    |    |   |     |   |
|----------|-------------------------------------------------------------------------------|-----------------|----|----|----|---|-----|---|
| 75224047 | Green peas, frozen, cooked with butter or margarine                           | 3000_Vegetables | 68 | 62 | 6  | 1 | 4.5 | B |
| 75200100 | Vegetables, NS as to type, cooked, NS as to fat added in cooking              | 3000_Vegetables | 68 | 61 | 7  | 1 | 4.5 | A |
| 75200120 | Vegetables, NS as to type, cooked, fat added in cooking, NS as to type of fat | 3000_Vegetables | 68 | 61 | 7  | 1 | 4.5 | A |
| 75311000 | Mixed vegetables, cooked, NS as to form, NS as to fat added in cooking        | 3000_Vegetables | 68 | 61 | 7  | 1 | 4.5 | A |
| 75311002 | Mixed vegetables, cooked, from frozen, NS as to fat added in cooking          | 3000_Vegetables | 68 | 61 | 7  | 1 | 4.5 | A |
| 75204010 | Beans, lima, immature, cooked, NS as to form, fat not added in cooking        | 3000_Vegetables | 68 | 59 | 9  | 1 | 4.5 | A |
| 75204013 | Beans, lima, immature, cooked, from canned, fat not added in cooking          | 3000_Vegetables | 68 | 59 | 9  | 1 | 4.5 | A |
| 75205051 | Green beans, canned, cooked with butter or margarine                          | 3000_Vegetables | 67 | 68 | -1 | 2 | 4   | A |
| 75233220 | Spaghetti squash, cooked                                                      | 3000_Vegetables | 67 | 68 | -1 | 2 | 4   | A |
| 75233223 | Squash, spaghetti, cooked, made with margarine                                | 3000_Vegetables | 67 | 68 | -1 | 2 | 4   | A |
| 71910310 | Pickled green bananas, Puerto Rican style                                     | 3000_Vegetables | 67 | 67 | 0  | 2 | 3   | C |
| 75226000 | Peppers, green, cooked, NS as to fat added in cooking                         | 3000_Vegetables | 67 | 66 | 1  | 2 | 4   | A |
| 75228000 | Rutabaga, cooked, NS as to fat added in cooking                               | 3000_Vegetables | 67 | 65 | 2  | 2 | 4   | B |
| 75311003 | Mixed vegetables, cooked, from canned, NS as to fat added in cooking          | 3000_Vegetables | 67 | 65 | 2  | 3 | 4   | B |
| 73111225 | Peas and carrots, cooked, NS as to form, made with butter                     | 3000_Vegetables | 67 | 62 | 5  | 1 | 4.5 | A |
| 73111228 | Peas and carrots, cooked, from fresh, made with butter                        | 3000_Vegetables | 67 | 62 | 5  | 1 | 4.5 | A |
| 73111231 | Peas and carrots, cooked, from frozen, made with butter                       | 3000_Vegetables | 67 | 62 | 5  | 1 | 4.5 | A |
| 75215040 | Celery, cooked, made with butter                                              | 3000_Vegetables | 67 | 62 | 5  | 2 | 4   | A |
| 75225015 | Pigeon peas, cooked, NS as to form, fat added in cooking                      | 3000_Vegetables | 67 | 62 | 5  | 1 | 5   | B |
| 73102215 | Carrots, cooked, NS as to form, made with butter                              | 3000_Vegetables | 67 | 61 | 6  | 1 | 4   | A |
| 75225014 | Pigeon peas, cooked, NS as to form, NS as to fat added in cooking             | 3000_Vegetables | 67 | 61 | 6  | 1 | 5   | B |
| 72125230 | Spinach, creamed                                                              | 3000_Vegetables | 66 | 68 | -2 | 3 | 4   | C |
| 71905110 | Fried ripe plantain, Puerto Rican style                                       | 3000_Vegetables | 66 | 67 | -1 | 2 | 3.5 | C |
| 71900200 | Plantain, cooked with oil                                                     | 3000_Vegetables | 66 | 64 | 2  | 1 | 3.5 | C |
| 73407060 | Sweet potato, canned, fat added                                               | 3000_Vegetables | 66 | 64 | 2  | 1 | 3.5 | A |
| 75234000 | Turnip, cooked, NS as to form, NS as to fat added in cooking                  | 3000_Vegetables | 66 | 64 | 2  | 2 | 4   | B |
| 75234003 | Turnip, cooked, from canned, NS as to fat added in cooking                    | 3000_Vegetables | 66 | 64 | 2  | 2 | 4   | B |
| 75234022 | Turnip, cooked, from frozen, fat added in cooking, NS as to type of fat       | 3000_Vegetables | 66 | 64 | 2  | 2 | 4   | A |
| 75513010 | Seaweed, pickled                                                              | 3000_Vegetables | 66 | 64 | 2  | 3 | 3   | D |
| 75204033 | Beans, lima, immature, cooked, from canned, made with oil                     | 3000_Vegetables | 66 | 63 | 3  | 3 | 4.5 | A |
| 75216134 | Corn, fresh, cooked with oil                                                  | 3000_Vegetables | 66 | 63 | 3  | 1 | 4   | B |
| 75216137 | Corn, frozen, cooked with oil                                                 | 3000_Vegetables | 66 | 63 | 3  | 1 | 4.5 | B |
| 75303021 | Corn with peppers, red or green, cooked, made with oil                        | 3000_Vegetables | 66 | 63 | 3  | 1 | 4   | B |
| 75315020 | Peas and corn, cooked, fat added                                              | 3000_Vegetables | 66 | 61 | 5  | 1 | 4.5 | B |
| 71103125 | Potato, boiled, from fresh, peel eaten, no added fat                          | 3000_Vegetables | 66 | 60 | 6  | 1 | 4.5 | B |
| 71104050 | Potato, roasted, from fresh, peel eaten, no added fat                         | 3000_Vegetables | 66 | 60 | 6  | 1 | 4.5 | B |

|          |                                                                                                                        |                 |    |    |    |   |     |   |
|----------|------------------------------------------------------------------------------------------------------------------------|-----------------|----|----|----|---|-----|---|
| 75204001 | Beans, lima, immature, cooked, from fresh, NS as to fat added in cooking                                               | 3000_Vegetables | 66 | 60 | 6  | 1 | 5   | B |
| 75204021 | Beans, lima, immature, cooked, from fresh, fat added in cooking, NS as to type of fat                                  | 3000_Vegetables | 66 | 60 | 6  | 1 | 5   | B |
| 75204022 | Lima beans, from frozen, fat added                                                                                     | 3000_Vegetables | 66 | 60 | 6  | 1 | 5   | A |
| 75224010 | Peas, green, cooked, NS as to form, NS as to fat added in cooking                                                      | 3000_Vegetables | 66 | 59 | 7  | 1 | 4.5 | C |
| 75224012 | Peas, green, cooked, from frozen, NS as to fat added in cooking                                                        | 3000_Vegetables | 66 | 59 | 7  | 1 | 4.5 | C |
| 75301110 | Lima beans and corn, cooked, no added fat                                                                              | 3000_Vegetables | 66 | 58 | 8  | 1 | 4.5 | A |
| 74204010 | Tomatoes, NS as to form, stewed                                                                                        | 3000_Vegetables | 65 | 70 | -5 | 4 | 4   | B |
| 74204013 | Tomatoes, from canned, stewed                                                                                          | 3000_Vegetables | 65 | 70 | -5 | 4 | 4   | A |
| 75208023 | Beets, canned, cooked, fat added                                                                                       | 3000_Vegetables | 65 | 64 | 1  | 3 | 3.5 | B |
| 75510010 | Olives, green                                                                                                          | 3000_Vegetables | 65 | 64 | 1  | 3 | 2.5 | D |
| 71962040 | Taro, cooked                                                                                                           | 3000_Vegetables | 65 | 61 | 4  | 1 | 4.5 | A |
| 73111203 | Peas and carrots, cooked, from canned, NS as to fat added in cooking                                                   | 3000_Vegetables | 65 | 61 | 4  | 3 | 4   | A |
| 75224033 | Green peas, canned, cooked, fat added, NS as to fat type                                                               | 3000_Vegetables | 65 | 61 | 4  | 3 | 4.5 | B |
| 75233025 | Squash, summer, yellow or green, cooked, NS as to form, made with butter                                               | 3000_Vegetables | 65 | 61 | 4  | 1 | 3.5 | A |
| 75317000 | Vegetables, stew type, cooked, NS as to fat added in cooking                                                           | 3000_Vegetables | 65 | 61 | 4  | 1 | 4   | A |
| 71950010 | Tannier, cooked                                                                                                        | 3000_Vegetables | 65 | 60 | 5  | 1 | 4.5 | A |
| 71962020 | Dasheen, cooked                                                                                                        | 3000_Vegetables | 65 | 60 | 5  | 1 | 4.5 | A |
| 75301121 | Beans, lima and corn, cooked, made with oil                                                                            | 3000_Vegetables | 65 | 60 | 5  | 1 | 4.5 | B |
| 71508001 | Potato, baked, peel eaten                                                                                              | 3000_Vegetables | 65 | 59 | 6  | 1 | 4.5 | B |
| 75223003 | Peas, cowpeas, field peas, or blackeye peas, not dried, cooked, from canned, NS as to fat added in cooking             | 3000_Vegetables | 65 | 59 | 6  | 1 | 5   | B |
| 75223021 | Peas, cowpeas, field peas, or blackeye peas, not dried, cooked, from fresh, fat added in cooking, NS as to type of fat | 3000_Vegetables | 65 | 59 | 6  | 1 | 4.5 | B |
| 75303010 | Corn with peppers, red or green, cooked, fat not added in cooking                                                      | 3000_Vegetables | 65 | 59 | 6  | 1 | 4   | C |
| 71101150 | White potato skins, with adhering flesh, baked                                                                         | 3000_Vegetables | 65 | 58 | 7  | 1 | 4.5 | B |
| 71941120 | Sweet potatoes, white, Puerto Rican, boiled                                                                            | 3000_Vegetables | 65 | 58 | 7  | 1 | 4.5 | B |
| 71945010 | Yam, cooked, Puerto Rican                                                                                              | 3000_Vegetables | 65 | 58 | 7  | 1 | 4.5 | B |
| 75223031 | Peas, cowpeas, field peas, or blackeye peas, not dried, cooked, from frozen, made with butter                          | 3000_Vegetables | 65 | 58 | 7  | 1 | 5   | A |
| 71401010 | Potato, french fries, from fresh, fried                                                                                | 3000_Vegetables | 64 | 65 | -1 | 2 | 4   | C |
| 75206003 | Beans, string, yellow, cooked, from canned, NS as to fat added in cooking                                              | 3000_Vegetables | 64 | 64 | 0  | 3 | 4   | A |
| 75206023 | Beans, string, yellow, cooked, from canned, fat added in cooking, NS as to type of fat                                 | 3000_Vegetables | 64 | 64 | 0  | 3 | 4   | A |
| 75510000 | Olives, NFS                                                                                                            | 3000_Vegetables | 64 | 63 | 1  | 3 | 3   | C |
| 75510020 | Olives, black                                                                                                          | 3000_Vegetables | 64 | 63 | 1  | 3 | 3   | C |
| 71103150 | Potato, boiled, from fresh, peel eaten, made with margarine                                                            | 3000_Vegetables | 64 | 61 | 3  | 2 | 4.5 | C |
| 71104090 | Potato, roasted, from fresh, peel eaten, made with margarine                                                           | 3000_Vegetables | 64 | 61 | 3  | 2 | 4.5 | C |
| 73401000 | Sweet potato, NFS                                                                                                      | 3000_Vegetables | 64 | 61 | 3  | 1 | 3.5 | C |
| 75216310 | Corn, canned, reduced sodium, cooked, no added fat                                                                     | 3000_Vegetables | 64 | 61 | 3  | 3 | 4.5 | B |



|          |                                                                          |                 |    |    |    |   |     |   |
|----------|--------------------------------------------------------------------------|-----------------|----|----|----|---|-----|---|
| 75224051 | Peas, green, cooked, from canned, made with margarine                    | 3000_Vegetables | 64 | 61 | 3  | 3 | 4.5 | B |
| 75216024 | Corn, cooked, NS as to form, NS as to color, made with oil               | 3000_Vegetables | 64 | 60 | 4  | 1 | 4   | B |
| 75216027 | Corn, cooked, from fresh, NS as to color, made with oil                  | 3000_Vegetables | 64 | 60 | 4  | 1 | 4.5 | C |
| 75216131 | Corn, yellow, cooked, NS as to form, made with oil                       | 3000_Vegetables | 64 | 60 | 4  | 1 | 4   | B |
| 75216177 | Corn, yellow and white, cooked, from fresh, made with oil                | 3000_Vegetables | 64 | 60 | 4  | 1 | 4   | C |
| 75234001 | Turnip, cooked, from fresh, NS as to fat added in cooking                | 3000_Vegetables | 64 | 60 | 4  | 2 | 4   | B |
| 75216111 | Corn, fresh, cooked, no added fat                                        | 3000_Vegetables | 64 | 57 | 7  | 1 | 4.5 | B |
| 71103320 | Potato, canned, no added fat                                             | 3000_Vegetables | 64 | 56 | 8  | 1 | 4.5 | B |
| 73410300 | Sweet potato fries, NS as to fresh or frozen                             | 3000_Vegetables | 63 | 68 | -5 | 3 | 4   | C |
| 73410310 | Sweet potato fries, frozen, fried                                        | 3000_Vegetables | 63 | 68 | -5 | 3 | 4   | B |
| 71603010 | Potato salad, made with mayonnaise                                       | 3000_Vegetables | 63 | 66 | -3 | 3 | 4   | C |
| 71401015 | Potato, french fries, from fresh, baked                                  | 3000_Vegetables | 63 | 63 | 0  | 2 | 4   | C |
| 71905120 | Plantain, ripe, rolled in flour, fried                                   | 3000_Vegetables | 63 | 63 | 0  | 1 | 4   | C |
| 71104150 | Potato, roasted, from fresh, peel not eaten, made with margarine         | 3000_Vegetables | 63 | 61 | 2  | 2 | 4.5 | C |
| 75204970 | Beans, string, cooked, from canned, NS as to color, made with butter     | 3000_Vegetables | 63 | 61 | 2  | 2 | 4   | A |
| 75226062 | Peppers, red, cooked, made with butter                                   | 3000_Vegetables | 63 | 60 | 3  | 1 | 4   | A |
| 71701000 | Potato pancake                                                           | 3000_Vegetables | 63 | 59 | 4  | 1 | 4   | C |
| 73402022 | Sweet potato, baked, peel eaten, made with butter                        | 3000_Vegetables | 63 | 59 | 4  | 1 | 3.5 | C |
| 75216227 | Corn, white, cooked, from fresh, made with oil                           | 3000_Vegetables | 63 | 59 | 4  | 1 | 4   | C |
| 71103010 | Potato, boiled, from fresh, peel not eaten, no added fat                 | 3000_Vegetables | 63 | 58 | 5  | 1 | 4.5 | B |
| 71941130 | Sweet potatoes, white, Puerto Rican, roasted or baked                    | 3000_Vegetables | 63 | 58 | 5  | 2 | 4   | B |
| 73403022 | Sweet potato, baked, peel not eaten, made with butter                    | 3000_Vegetables | 63 | 58 | 5  | 1 | 3.5 | C |
| 75301120 | Lima beans and corn, cooked, fat added                                   | 3000_Vegetables | 63 | 58 | 5  | 1 | 4.5 | A |
| 75315100 | Peas and onions, cooked, NS as to fat added in cooking                   | 3000_Vegetables | 63 | 58 | 5  | 1 | 4   | B |
| 75315120 | Peas and onions, cooked, fat added in cooking, NS as to type of fat      | 3000_Vegetables | 63 | 58 | 5  | 1 | 4   | B |
| 71101110 | White potato, baked, peel eaten, fat not added in cooking                | 3000_Vegetables | 63 | 57 | 6  | 1 | 4.5 | C |
| 71104120 | Potato, roasted, from fresh, peel not eaten, no added fat                | 3000_Vegetables | 63 | 57 | 6  | 1 | 4.5 | B |
| 75204023 | Lima beans, from canned                                                  | 3000_Vegetables | 63 | 57 | 6  | 1 | 4.5 | B |
| 75204964 | Beans, string, cooked, from fresh, NS as to color, made with butter      | 3000_Vegetables | 63 | 57 | 6  | 1 | 4.5 | A |
| 75205042 | Beans, string, green, cooked, NS as to form, made with butter            | 3000_Vegetables | 63 | 57 | 6  | 1 | 4   | A |
| 71103110 | White potato, boiled with peel, peel not eaten, fat not added in cooking | 3000_Vegetables | 63 | 56 | 7  | 1 | 4.5 | C |
| 75204967 | Beans, string, cooked, from frozen, NS as to color, made with butter     | 3000_Vegetables | 63 | 56 | 7  | 1 | 4   | A |
| 75206037 | Beans, string, yellow, cooked, from frozen, made with butter             | 3000_Vegetables | 63 | 56 | 7  | 1 | 4   | A |
| 71603030 | Potato salad, made with creamy dressing                                  | 3000_Vegetables | 62 | 66 | -4 | 3 | 4   | C |
| 71403500 | Potato, home fries, with vegetables                                      | 3000_Vegetables | 62 | 63 | -1 | 2 | 4   | C |
| 73407000 | Sweet potato, canned, NS as to fat                                       | 3000_Vegetables | 62 | 62 | 0  | 3 | 3.5 | C |
| 71403000 | White potato, home fries                                                 | 3000_Vegetables | 62 | 61 | 1  | 2 | 4   | C |
| 71103050 | Potato, boiled, from fresh, peel not eaten, made with margarine          | 3000_Vegetables | 62 | 60 | 2  | 2 | 4.5 | C |

|          |                                                                                                                                        |                 |    |    |    |   |     |   |
|----------|----------------------------------------------------------------------------------------------------------------------------------------|-----------------|----|----|----|---|-----|---|
| 71103105 | Potato, boiled, from fresh, peel eaten, NS as to fat                                                                                   | 3000_Vegetables | 62 | 59 | 3  | 1 | 4.5 | C |
| 71104040 | Potato, roasted, from fresh, peel eaten, NS as to fat                                                                                  | 3000_Vegetables | 62 | 59 | 3  | 1 | 4.5 | C |
| 71104060 | Potato, roasted, from fresh, peel eaten, fat added, NS as to fat type                                                                  | 3000_Vegetables | 62 | 59 | 3  | 1 | 4.5 | C |
| 71603045 | Potato salad, made with light Italian dressing                                                                                         | 3000_Vegetables | 62 | 59 | 3  | 2 | 4   | C |
| 74504122 | Tomato and onion, cooked, made with butter                                                                                             | 3000_Vegetables | 62 | 59 | 3  | 1 | 3.5 | B |
| 75311031 | Classic mixed vegetables, canned, cooked with butter or margarine                                                                      | 3000_Vegetables | 62 | 59 | 3  | 3 | 4   | A |
| 71103115 | Potato, boiled, from fresh, peel eaten, fat added, NS as to fat type                                                                   | 3000_Vegetables | 62 | 58 | 4  | 1 | 4.5 | C |
| 74505022 | Tomato with corn and okra, cooked, made with butter                                                                                    | 3000_Vegetables | 62 | 58 | 4  | 2 | 4   | C |
| 71101000 | Potato, baked, peel not eaten                                                                                                          | 3000_Vegetables | 62 | 57 | 5  | 1 | 4.5 | C |
| 75216224 | Corn, white, cooked, NS as to form, made with oil                                                                                      | 3000_Vegetables | 62 | 57 | 5  | 1 | 4   | B |
| 75216232 | Corn, white, cooked, from frozen, made with oil                                                                                        | 3000_Vegetables | 62 | 57 | 5  | 1 | 4   | B |
| 71100100 | Potato, baked, NFS                                                                                                                     | 3000_Vegetables | 62 | 56 | 6  | 1 | 4.5 | C |
| 75221000 | Onions, cooked, NS as to form, NS as to fat added in cooking                                                                           | 3000_Vegetables | 62 | 56 | 6  | 2 | 3.5 | A |
| 75221002 | Onions, cooked, from frozen, NS as to fat added in cooking                                                                             | 3000_Vegetables | 62 | 56 | 6  | 2 | 3.5 | A |
| 75221020 | Onions, cooked, NS as to form, fat added in cooking, NS as to type of fat                                                              | 3000_Vegetables | 62 | 56 | 6  | 2 | 3.5 | A |
| 75221022 | Onions, cooked, from frozen, fat added in cooking, NS as to type of fat                                                                | 3000_Vegetables | 62 | 56 | 6  | 2 | 3.5 | A |
| 75301123 | Beans, lima and corn, cooked, made with margarine                                                                                      | 3000_Vegetables | 62 | 56 | 6  | 1 | 4.5 | B |
| 75315305 | Peas and potatoes, cooked, NS as to fat added in cooking                                                                               | 3000_Vegetables | 62 | 56 | 6  | 1 | 4.5 | C |
| 75315310 | Peas and potatoes, cooked, fat added in cooking, NS as to type of fat                                                                  | 3000_Vegetables | 62 | 56 | 6  | 1 | 4.5 | C |
| 75330130 | Vegetable combination, excluding carrots, broccoli, and dark-green leafy; cooked, no sauce, NS as to fat added in cooking              | 3000_Vegetables | 62 | 56 | 6  | 1 | 4   | A |
| 75330150 | Vegetable combination, excluding carrots, broccoli, and dark-green leafy; cooked, no sauce, fat added in cooking, NS as to type of fat | 3000_Vegetables | 62 | 56 | 6  | 1 | 4   | A |
| 75216011 | Corn, cooked, from fresh, NS as to color, fat not added in cooking                                                                     | 3000_Vegetables | 62 | 55 | 7  | 1 | 4.5 | C |
| 75216211 | Corn, white, cooked, from fresh, fat not added in cooking                                                                              | 3000_Vegetables | 62 | 55 | 7  | 1 | 4   | C |
| 75315000 | Peas and corn, cooked, NS as to fat added in cooking                                                                                   | 3000_Vegetables | 62 | 55 | 7  | 1 | 4.5 | C |
| 71962010 | Dasheen, boiled                                                                                                                        | 3000_Vegetables | 62 | 54 | 8  | 1 | 4.5 | B |
| 75216112 | Corn, frozen, cooked, no added fat                                                                                                     | 3000_Vegetables | 62 | 54 | 8  | 1 | 4.5 | B |
| 75311025 | Mixed vegetables, cooked, NS as to form, made with butter                                                                              | 3000_Vegetables | 62 | 54 | 8  | 1 | 4   | A |
| 75208500 | Breadfruit, cooked, fat not added in cooking                                                                                           | 3000_Vegetables | 62 | 53 | 9  | 1 | 4   | C |
| 73410200 | Sweet potato fries, NFS                                                                                                                | 3000_Vegetables | 61 | 66 | -5 | 3 | 4   | C |
| 71602950 | Potato salad, from restaurant                                                                                                          | 3000_Vegetables | 61 | 64 | -3 | 3 | 4   | C |
| 73303040 | Squash, winter type, baked, no fat added in cooking, sugar added in cooking                                                            | 3000_Vegetables | 61 | 62 | -1 | 1 | 3.5 | B |
| 71403040 | Potato, home fries, from fresh                                                                                                         | 3000_Vegetables | 61 | 61 | 0  | 2 | 4   | C |
| 71405010 | Potato, hash brown, from fresh                                                                                                         | 3000_Vegetables | 61 | 61 | 0  | 2 | 4   | C |
| 71601030 | Potato salad with egg, made with creamy dressing                                                                                       | 3000_Vegetables | 61 | 61 | 0  | 2 | 3.5 | C |
| 74205011 | Tomatoes, green, cooked, from fresh                                                                                                    | 3000_Vegetables | 61 | 61 | 0  | 2 | 3.5 | C |
| 71603035 | Potato salad, made with light creamy dressing                                                                                          | 3000_Vegetables | 61 | 60 | 1  | 2 | 4   | C |

|          |                                                                                       |                 |    |    |    |   |     |   |
|----------|---------------------------------------------------------------------------------------|-----------------|----|----|----|---|-----|---|
| 71410000 | Potato skins without topping                                                          | 3000_Vegetables | 61 | 59 | 2  | 2 | 4   | C |
| 75217000 | Eggplant, cooked, NS as to fat added in cooking                                       | 3000_Vegetables | 61 | 57 | 4  | 2 | 4   | B |
| 75316023 | Squash, summer, yellow or green, and onions, cooked, made with butter                 | 3000_Vegetables | 61 | 57 | 4  | 1 | 3.5 | A |
| 71103200 | White potato, boiled, without peel, canned, low sodium, NS as to fat added in cooking | 3000_Vegetables | 61 | 56 | 5  | 1 | 4.5 | A |
| 71103220 | White potato, boiled, without peel, canned, low sodium, fat added in cooking          | 3000_Vegetables | 61 | 56 | 5  | 1 | 4.5 | A |
| 71900100 | Plantain, cooked, no added fat                                                        | 3000_Vegetables | 61 | 55 | 6  | 1 | 4   | C |
| 75208520 | Breadfruit, fried                                                                     | 3000_Vegetables | 61 | 55 | 6  | 1 | 4   | C |
| 75216179 | Corn, yellow and white, cooked, from fresh, made with margarine                       | 3000_Vegetables | 61 | 55 | 6  | 1 | 4   | C |
| 75216171 | Corn, yellow and white, cooked, from fresh, fat not added in cooking                  | 3000_Vegetables | 61 | 54 | 7  | 1 | 4   | C |
| 75224041 | Peas, green, cooked, NS as to form, made with butter                                  | 3000_Vegetables | 61 | 53 | 8  | 1 | 4.5 | C |
| 71403020 | Potato, home fries, NFS                                                               | 3000_Vegetables | 60 | 61 | -1 | 2 | 4   | C |
| 71603025 | Potato salad, made with light mayonnaise-type salad dressing                          | 3000_Vegetables | 60 | 61 | -1 | 2 | 4   | C |
| 71600950 | Potato salad with egg, from restaurant                                                | 3000_Vegetables | 60 | 60 | 0  | 3 | 3.5 | C |
| 75440200 | Vegetable tempura                                                                     | 3000_Vegetables | 60 | 59 | 1  | 2 | 3.5 | A |
| 71102990 | Potato, boiled, ready-to-heat                                                         | 3000_Vegetables | 60 | 57 | 3  | 1 | 4.5 | C |
| 71103000 | Potato, boiled, from fresh, peel not eaten, NS as to fat                              | 3000_Vegetables | 60 | 57 | 3  | 1 | 4.5 | C |
| 71103020 | Potato, boiled, from fresh, peel not eaten, fat added, NS as to fat type              | 3000_Vegetables | 60 | 57 | 3  | 1 | 4.5 | C |
| 71104030 | Potato, roasted, NFS                                                                  | 3000_Vegetables | 60 | 57 | 3  | 1 | 4.5 | C |
| 71104100 | Potato, roasted, from fresh, peel not eaten, NS as to fat                             | 3000_Vegetables | 60 | 57 | 3  | 1 | 4.5 | C |
| 71104110 | Potato, roasted, from fresh, peel not eaten, fat added, NS as to fat type             | 3000_Vegetables | 60 | 57 | 3  | 1 | 4.5 | C |
| 71104200 | Potato, roasted, ready-to-heat                                                        | 3000_Vegetables | 60 | 57 | 3  | 1 | 4.5 | C |
| 71910210 | Green banana, fried                                                                   | 3000_Vegetables | 60 | 57 | 3  | 1 | 4   | C |
| 71103300 | Potato, canned, NS as to fat                                                          | 3000_Vegetables | 60 | 56 | 4  | 2 | 4   | C |
| 71103310 | Potato, canned, fat added, NS as to fat type                                          | 3000_Vegetables | 60 | 56 | 4  | 2 | 4   | C |
| 71703040 | Stewed potatoes with tomatoes, Mexican style (Papas guisadas con tomate)              | 3000_Vegetables | 60 | 56 | 4  | 2 | 4   | C |
| 75216121 | Corn, fresh, cooked, fat added, NS as to fat type                                     | 3000_Vegetables | 60 | 56 | 4  | 1 | 4   | C |
| 71106000 | Stewed potatoes, Puerto Rican style                                                   | 3000_Vegetables | 60 | 55 | 5  | 1 | 4   | C |
| 71910110 | Green banana, cooked in salt water                                                    | 3000_Vegetables | 60 | 55 | 5  | 1 | 4   | C |
| 75216026 | Corn, cooked, NS as to form, NS as to color, made with margarine                      | 3000_Vegetables | 60 | 55 | 5  | 1 | 4   | C |
| 75216033 | Corn, cooked, from frozen, NS as to color, made with margarine                        | 3000_Vegetables | 60 | 55 | 5  | 1 | 4   | C |
| 75216122 | Corn, frozen, cooked, fat added, NS as to fat type                                    | 3000_Vegetables | 60 | 55 | 5  | 1 | 4.5 | B |
| 75216133 | Corn, yellow, cooked, NS as to form, made with margarine                              | 3000_Vegetables | 60 | 55 | 5  | 1 | 4   | C |
| 75216136 | Corn, yellow, cooked, from fresh, made with margarine                                 | 3000_Vegetables | 60 | 55 | 5  | 1 | 4.5 | C |
| 75216139 | Corn, yellow, cooked, from frozen, made with margarine                                | 3000_Vegetables | 60 | 55 | 5  | 1 | 4   | C |
| 75216229 | Corn, white, cooked, from fresh, made with margarine                                  | 3000_Vegetables | 60 | 55 | 5  | 1 | 4   | C |
| 75221001 | Onions, cooked, from fresh, NS as to fat added in cooking                             | 3000_Vegetables | 60 | 55 | 5  | 1 | 3.5 | A |

|          |                                                                                               |                 |    |    |    |   |     |   |
|----------|-----------------------------------------------------------------------------------------------|-----------------|----|----|----|---|-----|---|
| 75228022 | Rutabaga, cooked, made with butter                                                            | 3000_Vegetables | 60 | 55 | 5  | 1 | 3.5 | C |
| 75208000 | Beets, cooked, NS as to form, NS as to fat added in cooking                                   | 3000_Vegetables | 60 | 54 | 6  | 1 | 3.5 | A |
| 75208001 | Beets, cooked, from fresh, NS as to fat added in cooking                                      | 3000_Vegetables | 60 | 54 | 6  | 1 | 3.5 | A |
| 75234028 | Turnip, cooked, from fresh, made with butter                                                  | 3000_Vegetables | 60 | 54 | 6  | 1 | 4   | A |
| 75222000 | Parsnips, cooked, NS as to fat added in cooking                                               | 3000_Vegetables | 60 | 53 | 7  | 1 | 4.5 | C |
| 75223028 | Peas, cowpeas, field peas, or blackeye peas, not dried, cooked, from fresh, made with butter  | 3000_Vegetables | 60 | 53 | 7  | 1 | 4.5 | B |
| 75223034 | Peas, cowpeas, field peas, or blackeye peas, not dried, cooked, from canned, made with butter | 3000_Vegetables | 60 | 53 | 7  | 1 | 5   | B |
| 75505000 | Mushrooms, pickled                                                                            | 3000_Vegetables | 59 | 66 | -7 | 3 | 3.5 | C |
| 71603015 | Potato salad, made with light mayonnaise                                                      | 3000_Vegetables | 59 | 60 | -1 | 2 | 4   | C |
| 75208020 | Beets, NS as to form, cooked                                                                  | 3000_Vegetables | 59 | 57 | 2  | 3 | 3.5 | A |
| 75216320 | Corn, canned, reduced sodium, cooked, fat added, NS as to fat type                            | 3000_Vegetables | 59 | 57 | 2  | 3 | 4.5 | B |
| 73111234 | Peas and carrots, cooked, from canned, made with butter                                       | 3000_Vegetables | 59 | 55 | 4  | 3 | 4   | B |
| 74503009 | Tomato and corn, cooked, NS as to fat added in cooking                                        | 3000_Vegetables | 59 | 55 | 4  | 3 | 4   | B |
| 74503011 | Tomato and corn, cooked, fat added in cooking                                                 | 3000_Vegetables | 59 | 55 | 4  | 3 | 4   | B |
| 75306999 | Green peppers and onions, cooked, NS as to fat added in cooking                               | 3000_Vegetables | 59 | 55 | 4  | 2 | 4   | B |
| 77121010 | Fried stuffed potatoes, Puerto Rican style                                                    | 3000_Vegetables | 59 | 55 | 4  | 2 | 4   | C |
| 71905008 | Plantain, cooked, fat added, NS as to fat type                                                | 3000_Vegetables | 59 | 54 | 5  | 1 | 4   | C |
| 75224050 | Green peas, canned, cooked with butter or margarine                                           | 3000_Vegetables | 59 | 54 | 5  | 3 | 4.5 | B |
| 75302500 | Beans, string, green, and potatoes, cooked, NS as to fat added in cooking                     | 3000_Vegetables | 59 | 54 | 5  | 1 | 4   | A |
| 75302510 | Beans, string, green, and potatoes, cooked, fat added in cooking, NS as to type of fat        | 3000_Vegetables | 59 | 54 | 5  | 1 | 4   | A |
| 71106010 | Potato only from Puerto Rican mixed dishes, gravy and other components reported separately    | 3000_Vegetables | 59 | 53 | 6  | 1 | 4.5 | C |
| 71501080 | White potato, from fresh, mashed, not made with milk or fat                                   | 3000_Vegetables | 59 | 53 | 6  | 1 | 4   | C |
| 71601035 | Potato salad with egg, made with light creamy dressing                                        | 3000_Vegetables | 59 | 53 | 6  | 2 | 4   | B |
| 75302212 | Beans, string, green, with onions, cooked, made with butter                                   | 3000_Vegetables | 59 | 53 | 6  | 1 | 4   | A |
| 71501090 | White potato, from dry, mashed, made with milk, no fat                                        | 3000_Vegetables | 59 | 52 | 7  | 1 | 4   | B |
| 75204000 | Beans, lima, immature, cooked, NS as to form, NS as to fat added in cooking                   | 3000_Vegetables | 59 | 51 | 8  | 1 | 4.5 | B |
| 75204002 | Beans, lima, immature, cooked, from frozen, NS as to fat added in cooking                     | 3000_Vegetables | 59 | 51 | 8  | 1 | 4.5 | B |
| 75204020 | Beans, lima, immature, cooked, NS as to form, fat added in cooking, NS as to type of fat      | 3000_Vegetables | 59 | 51 | 8  | 1 | 4.5 | B |
| 75502010 | Cauliflower, pickled                                                                          | 3000_Vegetables | 58 | 62 | -4 | 3 | 3   | C |
| 71603040 | Potato salad, made with Italian dressing                                                      | 3000_Vegetables | 58 | 58 | 0  | 2 | 4   | C |
| 75216323 | Corn, yellow, canned, low sodium, made with margarine                                         | 3000_Vegetables | 58 | 58 | 0  | 3 | 4.5 | B |
| 71603020 | Potato salad, made with mayonnaise-type salad dressing                                        | 3000_Vegetables | 58 | 57 | 1  | 2 | 4   | C |
| 74202051 | Tomatoes, red, from fresh, fried                                                              | 3000_Vegetables | 58 | 57 | 1  | 2 | 3.5 | C |
| 71601015 | Potato salad with egg, made with light mayonnaise                                             | 3000_Vegetables | 58 | 55 | 3  | 2 | 4   | B |
| 71601025 | Potato salad with egg, made with light mayonnaise-type salad dressing                         | 3000_Vegetables | 58 | 54 | 4  | 2 | 4   | B |

|          |                                                                                                              |                 |    |    |    |   |     |   |
|----------|--------------------------------------------------------------------------------------------------------------|-----------------|----|----|----|---|-----|---|
| 75215990 | Corn, cooked, from restaurant                                                                                | 3000_Vegetables | 58 | 54 | 4  | 1 | 4   | C |
| 71508040 | White potato, stuffed, baked, peel eaten, stuffed with broccoli and cheese sauce                             | 3000_Vegetables | 58 | 53 | 5  | 2 | 4.5 | C |
| 75224013 | Peas, green, cooked, from canned, NS as to fat added in cooking                                              | 3000_Vegetables | 58 | 53 | 5  | 3 | 4.5 | C |
| 75226022 | Peppers, green, cooked, made with butter                                                                     | 3000_Vegetables | 58 | 53 | 5  | 1 | 4   | B |
| 75317012 | Vegetables, stew type, cooked, made with butter                                                              | 3000_Vegetables | 58 | 53 | 5  | 1 | 4   | B |
| 75216226 | Corn, white, cooked, NS as to form, made with margarine                                                      | 3000_Vegetables | 58 | 52 | 6  | 1 | 4   | C |
| 75315022 | Peas and corn, cooked, made with butter                                                                      | 3000_Vegetables | 58 | 50 | 8  | 1 | 4.5 | C |
| 75216010 | Corn, cooked, NS as to form, NS as to color, fat not added in cooking                                        | 3000_Vegetables | 58 | 49 | 9  | 1 | 4   | B |
| 75216012 | Corn, cooked, from frozen, NS as to color, fat not added in cooking                                          | 3000_Vegetables | 58 | 49 | 9  | 1 | 4   | B |
| 75216110 | Corn, yellow, cooked, NS as to form, fat not added in cooking                                                | 3000_Vegetables | 58 | 49 | 9  | 1 | 4   | B |
| 75515100 | Vegetables, pickled                                                                                          | 3000_Vegetables | 57 | 60 | -3 | 3 | 3   | D |
| 75216141 | Corn, canned, cooked with oil                                                                                | 3000_Vegetables | 57 | 55 | 2  | 3 | 4   | C |
| 75233210 | Squash, spaghetti, cooked, fat added in cooking, NS as to type of fat                                        | 3000_Vegetables | 57 | 54 | 3  | 2 | 4   | A |
| 71601020 | Potato salad with egg, made with mayonnaise-type salad dressing                                              | 3000_Vegetables | 57 | 53 | 4  | 2 | 4   | B |
| 71601040 | Potato salad with egg, made with Italian dressing                                                            | 3000_Vegetables | 57 | 53 | 4  | 2 | 4   | B |
| 71305011 | White potato, scalloped, fat not added in cooking                                                            | 3000_Vegetables | 57 | 51 | 6  | 1 | 4   | B |
| 71970200 | Fufu                                                                                                         | 3000_Vegetables | 57 | 51 | 6  | 1 | 4.5 | B |
| 73420000 | Sweet potato tots, NFS                                                                                       | 3000_Vegetables | 56 | 60 | -4 | 4 | 4   | B |
| 75510050 | Olive tapenade                                                                                               | 3000_Vegetables | 56 | 55 | 1  | 3 | 2   | D |
| 75216700 | Cucumber, cooked, NS as to fat added in cooking                                                              | 3000_Vegetables | 56 | 54 | 2  | 2 | 3.5 | A |
| 71401031 | Potato, french fries, restaurant                                                                             | 3000_Vegetables | 56 | 53 | 3  | 1 | 4   | C |
| 71000100 | Potato, NFS                                                                                                  | 3000_Vegetables | 56 | 52 | 4  | 1 | 4.5 | C |
| 71102980 | Potato, boiled, NFS                                                                                          | 3000_Vegetables | 56 | 52 | 4  | 1 | 4.5 | C |
| 71507040 | White potato, stuffed, baked, peel not eaten, stuffed with broccoli and cheese sauce                         | 3000_Vegetables | 56 | 52 | 4  | 2 | 4   | C |
| 71941110 | Sweet potatoes, white, Puerto Rican, fried                                                                   | 3000_Vegetables | 56 | 52 | 4  | 1 | 4.5 | C |
| 75208003 | Beets, cooked, from canned, NS as to fat added in cooking                                                    | 3000_Vegetables | 56 | 52 | 4  | 3 | 3.5 | B |
| 71601045 | Potato salad with egg, made with light Italian dressing                                                      | 3000_Vegetables | 56 | 50 | 6  | 1 | 4   | B |
| 73405022 | Sweet potato, boiled, made with butter                                                                       | 3000_Vegetables | 56 | 50 | 6  | 1 | 3.5 | C |
| 75216135 | Corn, fresh, cooked with butter or margarine                                                                 | 3000_Vegetables | 56 | 50 | 6  | 1 | 4   | C |
| 71905010 | Ripe plantain, boiled                                                                                        | 3000_Vegetables | 56 | 49 | 7  | 1 | 4   | C |
| 75330152 | Vegetable combination, excluding carrots, broccoli, and dark-green leafy; cooked, no sauce, made with butter | 3000_Vegetables | 56 | 49 | 7  | 1 | 4   | A |
| 71403010 | White potato, home fries, fat not added in cooking                                                           | 3000_Vegetables | 56 | 48 | 8  | 1 | 4   | C |
| 75216170 | Corn, yellow and white, cooked, NS as to form, fat not added in cooking                                      | 3000_Vegetables | 56 | 48 | 8  | 1 | 4.5 | B |
| 75216172 | Corn, yellow and white, cooked, from frozen, fat not added in cooking                                        | 3000_Vegetables | 56 | 48 | 8  | 1 | 4.5 | B |
| 75221015 | Onions, cooked, NS as to form, made with butter                                                              | 3000_Vegetables | 56 | 48 | 8  | 1 | 3.5 | A |
| 73410320 | Sweet potato fries, frozen, baked                                                                            | 3000_Vegetables | 55 | 61 | -6 | 4 | 4   | C |
| 73410500 | Sweet potato fries, school                                                                                   | 3000_Vegetables | 55 | 61 | -6 | 4 | 4   | B |

|          |                                                                                                                     |                 |    |    |    |   |     |   |
|----------|---------------------------------------------------------------------------------------------------------------------|-----------------|----|----|----|---|-----|---|
| 73420200 | Sweet potato tots, school                                                                                           | 3000_Vegetables | 55 | 61 | -6 | 4 | 4   | B |
| 75502510 | Cabbage, red, pickled                                                                                               | 3000_Vegetables | 55 | 59 | -4 | 3 | 3.5 | C |
| 71405019 | Potato, hash brown, from fresh, with cheese                                                                         | 3000_Vegetables | 55 | 54 | 1  | 2 | 3.5 | C |
| 74204011 | Tomatoes, from fresh, stewed                                                                                        | 3000_Vegetables | 55 | 54 | 1  | 3 | 4   | B |
| 71930190 | Yuca fries                                                                                                          | 3000_Vegetables | 55 | 53 | 2  | 2 | 4   | C |
| 77201210 | Green plantain with cracklings, Puerto Rican style                                                                  | 3000_Vegetables | 55 | 53 | 2  | 2 | 3   | D |
| 71405100 | White potato, hash brown, with cheese                                                                               | 3000_Vegetables | 55 | 51 | 4  | 1 | 3.5 | D |
| 71305010 | White potato, scalloped                                                                                             | 3000_Vegetables | 55 | 50 | 5  | 2 | 3.5 | C |
| 71101100 | White potato, baked, peel eaten, NS as to fat added in cooking                                                      | 3000_Vegetables | 55 | 49 | 6  | 1 | 4.5 | B |
| 71101120 | White potato, baked, peel eaten, fat added in cooking                                                               | 3000_Vegetables | 55 | 49 | 6  | 1 | 4.5 | B |
| 75221018 | Onions, cooked, from fresh, made with butter                                                                        | 3000_Vegetables | 55 | 49 | 6  | 1 | 3.5 | A |
| 75303000 | Corn with peppers, red or green, cooked, NS as to fat added in cooking                                              | 3000_Vegetables | 55 | 49 | 6  | 1 | 4   | C |
| 75303020 | Corn with peppers, red or green, cooked, fat added in cooking, NS as to type of fat                                 | 3000_Vegetables | 55 | 49 | 6  | 1 | 4   | C |
| 75307002 | Green peppers and onions, cooked, made with butter                                                                  | 3000_Vegetables | 55 | 49 | 6  | 1 | 3.5 | B |
| 71970110 | Starchy vegetables, NFS, Puerto Rican style                                                                         | 3000_Vegetables | 55 | 47 | 8  | 1 | 4.5 | C |
| 71970120 | Starchy vegetables, including tannier, white sweet potato and yam, with green or ripe plantains, Puerto Rican style | 3000_Vegetables | 55 | 47 | 8  | 1 | 4.5 | C |
| 71970130 | Starchy vegetables, including tannier, white sweet potato and yam, no plantain, Puerto Rican style                  | 3000_Vegetables | 55 | 47 | 8  | 1 | 4.5 | C |
| 75222022 | Parsnips, cooked, made with butter                                                                                  | 3000_Vegetables | 55 | 47 | 8  | 1 | 4.5 | C |
| 75216210 | Corn, white, cooked, NS as to form, fat not added in cooking                                                        | 3000_Vegetables | 55 | 46 | 9  | 1 | 4.5 | B |
| 75216212 | Corn, white, cooked, from frozen, fat not added in cooking                                                          | 3000_Vegetables | 55 | 46 | 9  | 1 | 4.5 | B |
| 75500110 | Green beans, pickled                                                                                                | 3000_Vegetables | 54 | 56 | -2 | 3 | 3   | D |
| 77205110 | Ripe plantain fritters, Puerto Rican style                                                                          | 3000_Vegetables | 54 | 50 | 4  | 2 | 3.5 | D |
| 71103100 | White potato, boiled with peel, peel not eaten, NS as to fat added in cooking                                       | 3000_Vegetables | 54 | 48 | 6  | 1 | 4   | C |
| 71103120 | White potato, boiled with peel, peel not eaten, fat added in cooking                                                | 3000_Vegetables | 54 | 48 | 6  | 1 | 4   | C |
| 75204003 | Beans, lima, immature, cooked, from canned, NS as to fat added in cooking                                           | 3000_Vegetables | 54 | 48 | 6  | 3 | 4.5 | B |
| 71602010 | Potato salad, German style                                                                                          | 3000_Vegetables | 54 | 47 | 7  | 1 | 4.5 | C |
| 75216138 | Corn, frozen, cooked with butter or margarine                                                                       | 3000_Vegetables | 54 | 47 | 7  | 1 | 4   | B |
| 75204031 | Beans, lima, immature, cooked, from frozen, made with butter                                                        | 3000_Vegetables | 54 | 45 | 9  | 1 | 4.5 | B |
| 73420020 | Sweet potato tots, from frozen, baked                                                                               | 3000_Vegetables | 53 | 58 | -5 | 4 | 4   | B |
| 75503080 | Eggplant, pickled                                                                                                   | 3000_Vegetables | 53 | 54 | -1 | 3 | 3.5 | D |
| 73301030 | Squash, winter type, mashed, fat and sugar added in cooking                                                         | 3000_Vegetables | 53 | 53 | 0  | 2 | 3.5 | C |
| 71703000 | Stewed potatoes, Mexican style (Papas guisadas)                                                                     | 3000_Vegetables | 53 | 49 | 4  | 2 | 4   | C |
| 75503085 | Ginger root, pickled                                                                                                | 3000_Vegetables | 53 | 49 | 4  | 4 | 2.5 | C |
| 75216113 | Corn, canned, cooked, no added fat                                                                                  | 3000_Vegetables | 53 | 48 | 5  | 3 | 4.5 | C |
| 71106070 | Potato from Puerto Rican chicken fricassee, with sauce                                                              | 3000_Vegetables | 53 | 47 | 6  | 2 | 4   | B |
| 71930130 | Cassava, cooked, made with oil                                                                                      | 3000_Vegetables | 53 | 47 | 6  | 1 | 4   | C |

|          |                                                                                         |                 |    |    |    |   |     |   |
|----------|-----------------------------------------------------------------------------------------|-----------------|----|----|----|---|-----|---|
| 73407030 | Sweet potato, canned in syrup, with fat added in cooking                                | 3000_Vegetables | 52 | 58 | -6 | 3 | 3.5 | C |
| 73407020 | Sweet potato, canned in syrup                                                           | 3000_Vegetables | 52 | 56 | -4 | 3 | 3.5 | C |
| 73303030 | Squash, winter type, baked, fat and sugar added in cooking                              | 3000_Vegetables | 52 | 53 | -1 | 2 | 3.5 | B |
| 75205200 | Fried green beans                                                                       | 3000_Vegetables | 52 | 50 | 2  | 2 | 3.5 | A |
| 71508060 | White potato, stuffed, baked, peel eaten, stuffed with bacon and cheese                 | 3000_Vegetables | 52 | 49 | 3  | 3 | 4   | C |
| 77121110 | Potato and ham fritters, Puerto Rican style                                             | 3000_Vegetables | 52 | 49 | 3  | 2 | 3.5 | C |
| 71501050 | White potato, from fresh, mashed, made with milk, fat and cheese                        | 3000_Vegetables | 52 | 48 | 4  | 2 | 3.5 | C |
| 75216300 | Corn, yellow, canned, low sodium, NS as to fat added in cooking                         | 3000_Vegetables | 52 | 48 | 4  | 3 | 4   | B |
| 75216322 | Corn, canned, reduced sodium, cooked with butter or margarine                           | 3000_Vegetables | 52 | 48 | 4  | 3 | 4   | C |
| 71301021 | White potato, cooked, with cheese, fat not added in cooking                             | 3000_Vegetables | 52 | 46 | 6  | 2 | 3.5 | C |
| 75302512 | Beans, string, green, and potatoes, cooked, made with butter                            | 3000_Vegetables | 52 | 46 | 6  | 1 | 4   | A |
| 71905100 | Plantain, cooked with butter or margarine                                               | 3000_Vegetables | 52 | 45 | 7  | 1 | 4   | C |
| 75216000 | Corn, cooked, NS as to form, NS as to color, NS as to fat added in cooking              | 3000_Vegetables | 52 | 45 | 7  | 1 | 4   | C |
| 75216001 | Corn, cooked, from fresh, NS as to color, NS as to fat added in cooking                 | 3000_Vegetables | 52 | 45 | 7  | 1 | 4   | C |
| 75216002 | Corn, cooked, from frozen, NS as to color, NS as to fat added in cooking                | 3000_Vegetables | 52 | 45 | 7  | 1 | 4   | C |
| 75216020 | Corn, cooked, NS as to form, NS as to color, fat added in cooking, NS as to type of fat | 3000_Vegetables | 52 | 45 | 7  | 1 | 4   | C |
| 75216021 | Corn, cooked, from fresh, NS as to color, fat added in cooking, NS as to type of fat    | 3000_Vegetables | 52 | 45 | 7  | 1 | 4   | C |
| 75216022 | Corn, cooked, from frozen, NS as to color, fat added in cooking, NS as to type of fat   | 3000_Vegetables | 52 | 45 | 7  | 1 | 4   | C |
| 75216100 | Corn, yellow, cooked, NS as to form, NS as to fat added in cooking                      | 3000_Vegetables | 52 | 45 | 7  | 1 | 4   | C |
| 75216101 | Corn, yellow, cooked, from fresh, NS as to fat added in cooking                         | 3000_Vegetables | 52 | 45 | 7  | 1 | 4   | C |
| 75216102 | Corn, yellow, cooked, from frozen, NS as to fat added in cooking                        | 3000_Vegetables | 52 | 45 | 7  | 1 | 4   | C |
| 75216161 | Corn, yellow and white, cooked, from fresh, NS as to fat added in cooking               | 3000_Vegetables | 52 | 45 | 7  | 1 | 4   | C |
| 75216181 | Corn, yellow and white, cooked, from fresh, fat added in cooking, NS as to type of fat  | 3000_Vegetables | 52 | 45 | 7  | 1 | 4   | C |
| 75216201 | Corn, white, cooked, from fresh, NS as to fat added in cooking                          | 3000_Vegetables | 52 | 45 | 7  | 1 | 4   | C |
| 75216221 | Corn, white, cooked, from fresh, fat added in cooking, NS as to type of fat             | 3000_Vegetables | 52 | 45 | 7  | 1 | 4   | C |
| 71601050 | Potato salad with egg, made with any type of fat free dressing                          | 3000_Vegetables | 52 | 41 | 11 | 1 | 4   | B |
| 75535000 | Zucchini, pickled                                                                       | 3000_Vegetables | 51 | 60 | -9 | 3 | 3   | D |
| 75502500 | Cabbage, fresh, pickled, Japanese style                                                 | 3000_Vegetables | 51 | 52 | -1 | 3 | 3.5 | C |
| 72202030 | Fried broccoli                                                                          | 3000_Vegetables | 51 | 49 | 2  | 2 | 3.5 | B |
| 75216143 | Corn, yellow, cooked, from canned, made with margarine                                  | 3000_Vegetables | 51 | 49 | 2  | 3 | 4   | C |
| 71410500 | Potato skins, with cheese                                                               | 3000_Vegetables | 51 | 48 | 3  | 2 | 3.5 | D |
| 75216123 | Corn, canned, cooked, fat added, NS as to fat type                                      | 3000_Vegetables | 51 | 48 | 3  | 3 | 4   | C |
| 71301020 | White potato, cooked, with cheese                                                       | 3000_Vegetables | 51 | 46 | 5  | 2 | 3.5 | C |
| 71301000 | White potato, cooked, with sauce, NS as to sauce                                        | 3000_Vegetables | 51 | 45 | 6  | 2 | 3.5 | C |

|          |                                                                                           |                 |    |    |    |   |     |   |
|----------|-------------------------------------------------------------------------------------------|-----------------|----|----|----|---|-----|---|
| 75216013 | Corn, cooked, from canned, NS as to color, fat not added in cooking                       | 3000_Vegetables | 51 | 45 | 6  | 3 | 4   | C |
| 71508050 | White potato, stuffed, baked, peel eaten, stuffed with meat in cream sauce                | 3000_Vegetables | 51 | 44 | 7  | 1 | 4   | C |
| 75216213 | Corn, white, cooked, from canned, fat not added in cooking                                | 3000_Vegetables | 51 | 44 | 7  | 3 | 4   | C |
| 75303022 | Corn with peppers, red or green, cooked, made with butter                                 | 3000_Vegetables | 51 | 44 | 7  | 1 | 4   | C |
| 73409000 | Sweet potato, casserole or mashed                                                         | 3000_Vegetables | 51 | 43 | 8  | 1 | 3.5 | A |
| 71400990 | Potato, french fries, NFS                                                                 | 3000_Vegetables | 50 | 53 | -3 | 3 | 4   | C |
| 71401000 | Potato, french fries, NS as to fresh or frozen                                            | 3000_Vegetables | 50 | 53 | -3 | 3 | 4   | C |
| 75414030 | Fried mushrooms                                                                           | 3000_Vegetables | 50 | 48 | 2  | 2 | 4   | C |
| 71901110 | Fried green plantain, Puerto Rican style                                                  | 3000_Vegetables | 50 | 47 | 3  | 2 | 2   | E |
| 75216036 | Corn, cooked, from canned, NS as to color, made with margarine                            | 3000_Vegetables | 50 | 47 | 3  | 3 | 4   | C |
| 75412010 | Fried eggplant                                                                            | 3000_Vegetables | 50 | 47 | 3  | 2 | 3.5 | A |
| 71508035 | Potato, baked, peel eaten, with vegetables                                                | 3000_Vegetables | 50 | 45 | 5  | 2 | 4   | C |
| 75216722 | Cucumber, cooked, made with butter                                                        | 3000_Vegetables | 50 | 45 | 5  | 2 | 3.5 | A |
| 71501020 | White potato, from fresh, mashed, made with milk and fat                                  | 3000_Vegetables | 50 | 44 | 6  | 1 | 4   | C |
| 71501030 | White potato, from fresh, mashed, made with fat                                           | 3000_Vegetables | 50 | 44 | 6  | 1 | 4   | C |
| 71501310 | White potato, from fresh, mashed, NS as to milk or fat                                    | 3000_Vegetables | 50 | 44 | 6  | 1 | 4   | C |
| 75216173 | Corn, yellow and white, cooked, from canned, fat not added in cooking                     | 3000_Vegetables | 50 | 44 | 6  | 3 | 4   | C |
| 71603050 | Potato salad, made with any type of fat free dressing                                     | 3000_Vegetables | 50 | 43 | 7  | 2 | 4   | C |
| 75216162 | Corn, yellow and white, cooked, from frozen, NS as to fat added in cooking                | 3000_Vegetables | 50 | 43 | 7  | 1 | 4   | C |
| 75216180 | Corn, yellow and white, cooked, NS as to form, fat added in cooking, NS as to type of fat | 3000_Vegetables | 50 | 43 | 7  | 1 | 4   | C |
| 75216182 | Corn, yellow and white, cooked, from frozen, fat added in cooking, NS as to type of fat   | 3000_Vegetables | 50 | 43 | 7  | 1 | 4   | C |
| 75216160 | Corn, yellow and white, cooked, NS as to form, NS as to fat added in cooking              | 3000_Vegetables | 50 | 42 | 8  | 1 | 4   | C |
| 75511020 | Peppers, pickled                                                                          | 3000_Vegetables | 49 | 53 | -4 | 3 | 3   | C |
| 71508070 | White potato, stuffed, baked, peel not eaten, stuffed with bacon and cheese               | 3000_Vegetables | 49 | 45 | 4  | 3 | 3.5 | D |
| 71507035 | Potato, baked, peel not eaten, with vegetables                                            | 3000_Vegetables | 49 | 44 | 5  | 2 | 4   | C |
| 75233222 | Squash, spaghetti, cooked, made with butter                                               | 3000_Vegetables | 49 | 44 | 5  | 1 | 4   | A |
| 71930120 | Cassava, cooked                                                                           | 3000_Vegetables | 49 | 43 | 6  | 1 | 4   | C |
| 71103140 | Potato, boiled, from fresh, peel eaten, made with butter                                  | 3000_Vegetables | 49 | 42 | 7  | 1 | 4   | C |
| 71104080 | Potato, roasted, from fresh, peel eaten, made with butter                                 | 3000_Vegetables | 49 | 42 | 7  | 1 | 4   | C |
| 71508005 | Potato, baked, peel eaten, with butter                                                    | 3000_Vegetables | 49 | 42 | 7  | 1 | 4   | C |
| 71930150 | Cassava, cooked, made with margarine                                                      | 3000_Vegetables | 49 | 42 | 7  | 1 | 4   | C |
| 71702000 | Potato pudding                                                                            | 3000_Vegetables | 49 | 41 | 8  | 2 | 3   | C |
| 75216178 | Corn, yellow and white, cooked, from fresh, made with butter                              | 3000_Vegetables | 49 | 41 | 8  | 1 | 4   | C |
| 75216200 | Corn, white, cooked, NS as to form, NS as to fat added in cooking                         | 3000_Vegetables | 49 | 41 | 8  | 1 | 4   | C |
| 75216202 | Corn, white, cooked, from frozen, NS as to fat added in cooking                           | 3000_Vegetables | 49 | 41 | 8  | 1 | 4   | C |



|          |                                                                                |                 |    |    |    |   |     |   |
|----------|--------------------------------------------------------------------------------|-----------------|----|----|----|---|-----|---|
| 75216220 | Corn, white, cooked, NS as to form, fat added in cooking, NS as to type of fat | 3000_Vegetables | 49 | 41 | 8  | 1 | 4   | C |
| 75216222 | Corn, white, cooked, from frozen, fat added in cooking, NS as to type of fat   | 3000_Vegetables | 49 | 41 | 8  | 1 | 4   | C |
| 75216228 | Corn, white, cooked, from fresh, made with butter                              | 3000_Vegetables | 49 | 41 | 8  | 1 | 4   | C |
| 75500510 | Celery, pickled                                                                | 3000_Vegetables | 48 | 53 | -5 | 3 | 3   | D |
| 73406010 | Sweet potato with fruit                                                        | 3000_Vegetables | 48 | 49 | -1 | 3 | 3.5 | B |
| 73102240 | Carrots, cooked, NS as to form, glazed                                         | 3000_Vegetables | 48 | 45 | 3  | 2 | 4   | B |
| 71501011 | Potato, mashed, from fresh, made with milk, with cheese                        | 3000_Vegetables | 48 | 43 | 5  | 2 | 3.5 | C |
| 71508030 | Potato, baked, peel eaten, with chili                                          | 3000_Vegetables | 48 | 43 | 5  | 2 | 4   | B |
| 75216120 | Corn, NS as to form, cooked                                                    | 3000_Vegetables | 48 | 43 | 5  | 3 | 4   | C |
| 71501000 | Potato, mashed, NFS                                                            | 3000_Vegetables | 48 | 42 | 6  | 1 | 4   | C |
| 71501010 | Potato, mashed, from fresh, made with milk                                     | 3000_Vegetables | 48 | 42 | 6  | 1 | 4   | C |
| 71501013 | Potato, mashed, from fresh, NFS                                                | 3000_Vegetables | 48 | 42 | 6  | 1 | 4   | C |
| 71508020 | Potato, baked, peel eaten, with cheese                                         | 3000_Vegetables | 48 | 42 | 6  | 2 | 4   | C |
| 71507050 | White potato, stuffed, baked, peel not eaten, stuffed with meat in cream sauce | 3000_Vegetables | 48 | 41 | 7  | 2 | 4   | C |
| 71106020 | Potato from Puerto Rican style stuffed pot roast, with gravy                   | 3000_Vegetables | 48 | 40 | 8  | 2 | 4   | B |
| 71106050 | Potato from Puerto Rican beef stew, with gravy                                 | 3000_Vegetables | 48 | 40 | 8  | 2 | 4   | B |
| 75216028 | Corn, cooked, from fresh, NS as to color, made with butter                     | 3000_Vegetables | 48 | 40 | 8  | 1 | 4   | C |
| 75217022 | Eggplant, cooked, made with butter                                             | 3000_Vegetables | 48 | 40 | 8  | 2 | 4   | B |
| 75216025 | Corn, cooked, NS as to form, NS as to color, made with butter                  | 3000_Vegetables | 48 | 39 | 9  | 1 | 4   | C |
| 75216132 | Corn, yellow, cooked, NS as to form, made with butter                          | 3000_Vegetables | 48 | 39 | 9  | 1 | 4   | C |
| 71411000 | Potato skins, with cheese and bacon                                            | 3000_Vegetables | 47 | 44 | 3  | 2 | 3.5 | D |
| 75414500 | Fried okra                                                                     | 3000_Vegetables | 47 | 44 | 3  | 2 | 3   | C |
| 71507030 | Potato, baked, peel not eaten, with chili                                      | 3000_Vegetables | 47 | 42 | 5  | 2 | 4   | C |
| 71103040 | Potato, boiled, from fresh, peel not eaten, made with butter                   | 3000_Vegetables | 47 | 41 | 6  | 1 | 4   | C |
| 71104140 | Potato, roasted, from fresh, peel not eaten, made with butter                  | 3000_Vegetables | 47 | 41 | 6  | 1 | 4   | C |
| 71507005 | Potato, baked, peel not eaten, with butter                                     | 3000_Vegetables | 47 | 40 | 7  | 1 | 4   | C |
| 71508000 | White potato, stuffed, baked, peel eaten, NS as to topping                     | 3000_Vegetables | 47 | 40 | 7  | 2 | 4   | C |
| 71508010 | Potato, baked, peel eaten, with sour cream                                     | 3000_Vegetables | 47 | 40 | 7  | 1 | 4   | C |
| 71501070 | White potato, from dry, mashed, made with milk, fat, egg and cheese            | 3000_Vegetables | 47 | 39 | 8  | 2 | 2   | D |
| 71508120 | White potato, stuffed with ham, broccoli and cheese sauce, baked, peel eaten   | 3000_Vegetables | 47 | 39 | 8  | 2 | 4   | A |
| 73102241 | Carrots, glazed, cooked                                                        | 3000_Vegetables | 46 | 45 | 1  | 2 | 4   | B |
| 75409020 | Fried cauliflower                                                              | 3000_Vegetables | 46 | 43 | 3  | 2 | 3.5 | C |
| 71305015 | Potato, scalloped, NFS                                                         | 3000_Vegetables | 46 | 41 | 5  | 2 | 3   | D |
| 71503010 | Potato patty                                                                   | 3000_Vegetables | 46 | 41 | 5  | 3 | 3   | C |
| 71507020 | Potato, baked, peel not eaten, with cheese                                     | 3000_Vegetables | 46 | 41 | 5  | 2 | 4   | C |
| 71508025 | Potato, baked, peel eaten, with meat                                           | 3000_Vegetables | 46 | 40 | 6  | 2 | 4   | C |
| 71501060 | White potato, from dry, mashed, made with milk, fat and egg                    | 3000_Vegetables | 46 | 37 | 9  | 2 | 3.5 | D |

|          |                                                                                         |                 |    |    |    |   |     |   |
|----------|-----------------------------------------------------------------------------------------|-----------------|----|----|----|---|-----|---|
| 74205020 | Tomato, green, pickled                                                                  | 3000_Vegetables | 45 | 45 | 0  | 2 | 2.5 | C |
| 74205010 | Fried green tomatoes                                                                    | 3000_Vegetables | 45 | 42 | 3  | 2 | 3.5 | C |
| 75418010 | Fried summer squash, yellow or green                                                    | 3000_Vegetables | 45 | 42 | 3  | 2 | 3   | C |
| 71305030 | Potato, scalloped, from fresh                                                           | 3000_Vegetables | 45 | 41 | 4  | 2 | 3   | D |
| 75415021 | Onion rings, from fresh, batter-dipped, baked or fried                                  | 3000_Vegetables | 45 | 41 | 4  | 2 | 3   | C |
| 71501045 | Potato, mashed, from dry mix, made with milk, with cheese                               | 3000_Vegetables | 45 | 40 | 5  | 2 | 3   | C |
| 75216142 | Corn, canned, cooked with butter or margarine                                           | 3000_Vegetables | 45 | 40 | 5  | 3 | 4   | C |
| 71501012 | Potato, mashed, from fresh, made with milk, with gravy                                  | 3000_Vegetables | 45 | 39 | 6  | 2 | 4   | C |
| 71507010 | Potato, baked, peel not eaten, with sour cream                                          | 3000_Vegetables | 45 | 39 | 6  | 1 | 4   | C |
| 75216233 | Corn, white, cooked, from frozen, made with butter                                      | 3000_Vegetables | 45 | 35 | 10 | 1 | 4   | C |
| 71401033 | Potato, french fries, school                                                            | 3000_Vegetables | 44 | 51 | -7 | 4 | 4   | C |
| 71505020 | Potato tots, school                                                                     | 3000_Vegetables | 44 | 51 | -7 | 4 | 4   | C |
| 71404050 | Potato, hash brown, from school lunch                                                   | 3000_Vegetables | 44 | 49 | -5 | 4 | 4.5 | B |
| 75216070 | Corn, dried, cooked                                                                     | 3000_Vegetables | 44 | 43 | 1  | 3 | 4   | C |
| 71305050 | Potato, scalloped, from dry mix                                                         | 3000_Vegetables | 44 | 40 | 4  | 2 | 3   | D |
| 71305070 | Potato, scalloped, ready-to-heat                                                        | 3000_Vegetables | 44 | 39 | 5  | 2 | 3   | D |
| 71501016 | Potato, mashed, from restaurant                                                         | 3000_Vegetables | 44 | 39 | 5  | 2 | 3.5 | C |
| 71501300 | White potato, from dry, mashed, NS as to milk or fat                                    | 3000_Vegetables | 44 | 39 | 5  | 2 | 3   | C |
| 71507025 | Potato, baked, peel not eaten, with meat                                                | 3000_Vegetables | 44 | 39 | 5  | 2 | 4   | C |
| 75216003 | Corn, cooked, from canned, NS as to color, NS as to fat added in cooking                | 3000_Vegetables | 44 | 38 | 6  | 3 | 4   | C |
| 75216023 | Corn, cooked, from canned, NS as to color, fat added in cooking, NS as to type of fat   | 3000_Vegetables | 44 | 38 | 6  | 3 | 4   | C |
| 75216103 | Corn, yellow, cooked, from canned, NS as to fat added in cooking                        | 3000_Vegetables | 44 | 38 | 6  | 3 | 4   | C |
| 71930100 | Cassava, cooked, fat not added in cooking                                               | 3000_Vegetables | 44 | 36 | 8  | 1 | 4   | C |
| 73102242 | Carrots, cooked, from frozen, glazed                                                    | 3000_Vegetables | 43 | 42 | 1  | 2 | 3.5 | C |
| 71305020 | Potato, scalloped, from fast food or restaurant                                         | 3000_Vegetables | 43 | 38 | 5  | 2 | 2   | D |
| 71305040 | Potato, scalloped, from fresh, with meat                                                | 3000_Vegetables | 43 | 38 | 5  | 2 | 3   | D |
| 71501035 | Potato, mashed, from dry mix, NFS                                                       | 3000_Vegetables | 43 | 38 | 5  | 2 | 3.5 | C |
| 75216163 | Corn, yellow and white, cooked, from canned, NS as to fat added in cooking              | 3000_Vegetables | 43 | 38 | 5  | 3 | 4   | C |
| 75216183 | Corn, yellow and white, cooked, from canned, fat added in cooking, NS as to type of fat | 3000_Vegetables | 43 | 38 | 5  | 3 | 4   | C |
| 75216223 | Corn, white, cooked, from canned, fat added in cooking, NS as to type of fat            | 3000_Vegetables | 43 | 37 | 6  | 3 | 4   | C |
| 71507000 | White potato, stuffed, baked, peel not eaten, NS as to topping                          | 3000_Vegetables | 43 | 36 | 7  | 2 | 3.5 | C |
| 71401041 | Potato, french fries, with cheese, school                                               | 3000_Vegetables | 42 | 49 | -7 | 4 | 4   | C |
| 73410400 | Sweet potato fries, fast food / restaurant                                              | 3000_Vegetables | 42 | 47 | -5 | 4 | 3   | C |
| 71501040 | Potato, mashed, from dry mix, made with milk                                            | 3000_Vegetables | 42 | 37 | 5  | 2 | 3.5 | C |
| 71301120 | White potato, cooked, with ham and cheese                                               | 3000_Vegetables | 42 | 35 | 7  | 2 | 3.5 | C |
| 71305110 | White potato, scalloped, with ham                                                       | 3000_Vegetables | 42 | 34 | 8  | 2 | 3.5 | C |
| 71403050 | Potato, home fries, ready-to-heat                                                       | 3000_Vegetables | 41 | 49 | -8 | 4 | 4   | C |

|          |                                                                                              |                 |    |    |    |   |     |   |
|----------|----------------------------------------------------------------------------------------------|-----------------|----|----|----|---|-----|---|
| 71405030 | Potato, hash brown, from dry mix                                                             | 3000_Vegetables | 41 | 46 | -5 | 4 | 4   | C |
| 71405040 | Potato, hash brown, ready-to-heat                                                            | 3000_Vegetables | 41 | 46 | -5 | 4 | 4   | C |
| 75515010 | Vegetable relish                                                                             | 3000_Vegetables | 41 | 46 | -5 | 3 | 3.5 | B |
| 71305080 | Potato, scalloped, ready-to-heat, with meat                                                  | 3000_Vegetables | 41 | 36 | 5  | 2 | 2.5 | D |
| 71501017 | Potato, mashed, from restaurant, with gravy                                                  | 3000_Vegetables | 41 | 36 | 5  | 2 | 3   | C |
| 71501025 | White potato, from fresh, mashed, made with milk, and sour cream and/or cream cheese and fat | 3000_Vegetables | 41 | 36 | 5  | 2 | 3   | C |
| 71305060 | Potato, scalloped, from dry mix, with meat                                                   | 3000_Vegetables | 41 | 35 | 6  | 2 | 3   | D |
| 71501055 | White potato, from fresh, mashed, made with sour cream and/or cream cheese and fat           | 3000_Vegetables | 41 | 35 | 6  | 2 | 3   | C |
| 71501015 | White potato, from fresh, mashed, made with milk, and sour cream and/or cream cheese         | 3000_Vegetables | 41 | 34 | 7  | 2 | 3.5 | C |
| 71404000 | Potato, hash brown, NFS                                                                      | 3000_Vegetables | 40 | 46 | -6 | 4 | 4   | C |
| 71402500 | Potato, french fries, with cheese                                                            | 3000_Vegetables | 40 | 42 | -2 | 4 | 3   | C |
| 71501200 | White potato, from complete dry mix, mashed, made with water                                 | 3000_Vegetables | 40 | 42 | -2 | 4 | 4   | B |
| 75534030 | Turnip, pickled                                                                              | 3000_Vegetables | 40 | 41 | -1 | 3 | 2.5 | D |
| 75511300 | Pickles, fried                                                                               | 3000_Vegetables | 40 | 36 | 4  | 2 | 2.5 | C |
| 71501054 | Potato, mashed, from dry mix, made with milk, with gravy                                     | 3000_Vegetables | 40 | 34 | 6  | 2 | 3   | C |
| 75216035 | Corn, cooked, from canned, NS as to color, made with butter                                  | 3000_Vegetables | 40 | 33 | 7  | 3 | 4   | C |
| 71930090 | Cassava, cooked, NS as to fat added in cooking                                               | 3000_Vegetables | 40 | 32 | 8  | 1 | 4   | C |
| 71401032 | Potato, french fries, from frozen, fried                                                     | 3000_Vegetables | 39 | 46 | -7 | 4 | 4   | C |
| 71501018 | Potato, mashed, from school lunch                                                            | 3000_Vegetables | 39 | 42 | -3 | 4 | 4   | B |
| 75216188 | Corn, yellow and white, cooked, from canned, made with butter                                | 3000_Vegetables | 39 | 33 | 6  | 3 | 4   | C |
| 71401030 | Potato, french fries, fast food                                                              | 3000_Vegetables | 38 | 42 | -4 | 4 | 4.5 | C |
| 71402510 | Potato, french fries, with chili and cheese                                                  | 3000_Vegetables | 38 | 40 | -2 | 4 | 3   | C |
| 71404040 | Potato, hash brown, from restaurant, with cheese                                             | 3000_Vegetables | 37 | 39 | -2 | 4 | 3   | D |
| 71505000 | Potato tots, NFS                                                                             | 3000_Vegetables | 37 | 38 | -1 | 4 | 3.5 | C |
| 75500210 | Beets, pickled                                                                               | 3000_Vegetables | 37 | 34 | 3  | 3 | 3.5 | A |
| 71405000 | White potato, hash brown, NS as to from fresh, frozen, or dry mix                            | 3000_Vegetables | 36 | 41 | -5 | 4 | 3.5 | D |
| 71405020 | White potato, hash brown, from frozen                                                        | 3000_Vegetables | 36 | 41 | -5 | 4 | 3.5 | D |
| 71405050 | Potato, hash brown, ready-to-heat, with cheese                                               | 3000_Vegetables | 36 | 41 | -5 | 4 | 3.5 | D |
| 71404010 | Potato, hash brown, from fast food                                                           | 3000_Vegetables | 36 | 40 | -4 | 4 | 3.5 | D |
| 71404030 | Potato, hash brown, from restaurant                                                          | 3000_Vegetables | 36 | 40 | -4 | 4 | 3.5 | D |
| 71402520 | Potato, french fries, with chili                                                             | 3000_Vegetables | 36 | 39 | -3 | 4 | 3.5 | C |
| 73406000 | Sweet potato, candied                                                                        | 3000_Vegetables | 36 | 39 | -3 | 2 | 2.5 | C |
| 71505030 | Potato tots, from fresh, fried or baked                                                      | 3000_Vegetables | 36 | 38 | -2 | 4 | 3.5 | C |
| 71930140 | Cassava, cooked, made with butter                                                            | 3000_Vegetables | 36 | 27 | 9  | 1 | 4   | C |
| 71401020 | Potato, french fries, from frozen, baked                                                     | 3000_Vegetables | 35 | 39 | -4 | 4 | 4.5 | C |
| 71401035 | White potato, french fries, from frozen, NS as to deep fried or oven baked                   | 3000_Vegetables | 35 | 39 | -4 | 4 | 4.5 | C |
| 71401045 | Potato, french fries, with chili, fast food / restaurant                                     | 3000_Vegetables | 35 | 38 | -3 | 4 | 3.5 | C |

|          |                                                                     |                 |    |    |     |   |     |   |
|----------|---------------------------------------------------------------------|-----------------|----|----|-----|---|-----|---|
| 71601010 | Potato salad with egg, made with mayonnaise                         | 3000_Vegetables | 34 | 41 | -7  | 4 | 3.5 | C |
| 71905210 | Candied ripe plantain, Puerto Rican style                           | 3000_Vegetables | 34 | 36 | -2  | 2 | 2   | D |
| 71401039 | Potato, french fries, with cheese, fast food / restaurant           | 3000_Vegetables | 33 | 37 | -4  | 4 | 3   | C |
| 71404020 | Potato, hash brown, from fast food, with cheese                     | 3000_Vegetables | 33 | 37 | -4  | 4 | 3   | D |
| 71401050 | Potato, french fries, with chili and cheese, fast food / restaurant | 3000_Vegetables | 33 | 36 | -3  | 4 | 3   | C |
| 73102243 | Carrots, cooked, from canned, glazed                                | 3000_Vegetables | 33 | 34 | -1  | 2 | 3   | C |
| 71701500 | Lefse (Norwegian)                                                   | 3000_Vegetables | 33 | 25 | 8   | 1 | 4   | C |
| 71501005 | Potato, mashed, from fast food                                      | 3000_Vegetables | 32 | 35 | -3  | 4 | 4   | C |
| 71402505 | White potato, french fries, with cheese and bacon                   | 3000_Vegetables | 32 | 34 | -2  | 4 | 1.5 | E |
| 71403030 | Potato, home fries, from restaurant / fast food                     | 3000_Vegetables | 31 | 34 | -3  | 4 | 3.5 | C |
| 73304010 | Squash fritter or cake                                              | 3000_Vegetables | 31 | 23 | 8   | 2 | 3   | D |
| 74202050 | Tomatoes, red, NS as to form, fried                                 | 3000_Vegetables | 31 | 22 | 9   | 3 | 3   | C |
| 71501071 | Potato, mashed, ready-to-heat, with cheese                          | 3000_Vegetables | 30 | 32 | -2  | 4 | 3   | C |
| 71505050 | Potato tots, frozen, fried                                          | 3000_Vegetables | 29 | 33 | -4  | 4 | 3.5 | C |
| 71505060 | Potato tots, frozen, NS as to fried or baked                        | 3000_Vegetables | 29 | 33 | -4  | 4 | 3.5 | C |
| 75216153 | Corn, creamed                                                       | 3000_Vegetables | 29 | 28 | 1   | 4 | 4   | C |
| 71501006 | Potato, mashed, from fast food, with gravy                          | 3000_Vegetables | 28 | 30 | -2  | 4 | 3.5 | C |
| 75216193 | Corn, yellow, from canned, cream style, fat added in cooking        | 3000_Vegetables | 28 | 27 | 1   | 4 | 3.5 | C |
| 75216053 | Corn, from canned, NS as to color, cream style                      | 3000_Vegetables | 27 | 27 | 0   | 4 | 3.5 | C |
| 75216190 | Corn, yellow, NS as to form, cream style, fat added in cooking      | 3000_Vegetables | 27 | 25 | 2   | 4 | 3.5 | C |
| 75411020 | Corn fritter                                                        | 3000_Vegetables | 27 | 18 | 9   | 3 | 2.5 | D |
| 75512010 | Radishes, pickled, Hawaiian style                                   | 3000_Vegetables | 25 | 35 | -10 | 4 | 3   | C |
| 71501007 | Potato, mashed, ready-to-heat                                       | 3000_Vegetables | 25 | 26 | -1  | 4 | 3.5 | C |
| 71501061 | Potato, mashed, ready-to-heat, NFS                                  | 3000_Vegetables | 25 | 26 | -1  | 4 | 3.5 | C |
| 71505040 | Potato tots, frozen, baked                                          | 3000_Vegetables | 25 | 26 | -1  | 4 | 4   | C |
| 75216050 | Corn, NS as to form, NS as to color, cream style                    | 3000_Vegetables | 25 | 24 | 1   | 4 | 3.5 | C |
| 75216150 | Corn, yellow, NS as to form, cream style                            | 3000_Vegetables | 25 | 24 | 1   | 4 | 3.5 | C |
| 75216253 | Corn, white, from canned, cream style                               | 3000_Vegetables | 24 | 23 | 1   | 4 | 3.5 | C |
| 71505010 | Potato tots, fast food / restaurant                                 | 3000_Vegetables | 23 | 25 | -2  | 4 | 3.5 | D |
| 71501075 | Potato, mashed, ready-to-heat, with gravy                           | 3000_Vegetables | 23 | 23 | 0   | 4 | 3.5 | C |
| 75216250 | Corn, white, NS as to form, cream style                             | 3000_Vegetables | 23 | 21 | 2   | 4 | 3.5 | C |
| 75415022 | Fried onion rings                                                   | 3000_Vegetables | 21 | 25 | -4  | 4 | 2.5 | D |
| 71402040 | White potato, french fries, breaded or battered                     | 3000_Vegetables | 21 | 21 | 0   | 4 | 3   | D |
| 75503100 | Mustard pickles                                                     | 3000_Vegetables | 20 | 25 | -5  | 3 | 2.5 | C |
| 75501010 | Relish, corn                                                        | 3000_Vegetables | 20 | 21 | -1  | 3 | 3   | C |
| 75415020 | Onion rings, NS as to form, batter-dipped, baked or fried           | 3000_Vegetables | 18 | 24 | -6  | 4 | 3   | C |
| 91408100 | Chinese preserved sweet vegetable                                   | 3000_Vegetables | 15 | 20 | -5  | 2 | 0.5 | D |
| 75503140 | Cucumber pickles, sweet, reduced salt                               | 3000_Vegetables | 9  | 21 | -12 | 4 | 3   | C |
| 75503040 | Pickles, sweet                                                      | 3000_Vegetables | 1  | 10 | -9  | 4 | 3   | C |

|          |                                                     |                 |     |     |    |   |     |   |
|----------|-----------------------------------------------------|-----------------|-----|-----|----|---|-----|---|
| 75503050 | Cucumber pickles, fresh                             | 3000_Vegetables | 1   | 10  | -9 | 4 | 3   | C |
| 75503020 | Relish, pickle                                      | 3000_Vegetables | 1   | 2   | -1 | 4 | 2   | D |
| 75511200 | Pickles, mixed                                      | 3000_Vegetables | 1   | 2   | -1 | 4 | 2   | D |
| 41107000 | Soybeans, dry, cooked, fat not added in cooking     | 4000_LegNut     | 100 | 100 | 0  | 1 | 5   | A |
| 41420020 | Edamame, cooked                                     | 4000_LegNut     | 100 | 100 | 0  | 1 | 5   | A |
| 41422010 | Soybean meal                                        | 4000_LegNut     | 100 | 100 | 0  | 1 | 5   | A |
| 41440000 | Textured vegetable protein, dry                     | 4000_LegNut     | 100 | 100 | 0  | 1 | 5   | A |
| 42100100 | Almonds, NFS                                        | 4000_LegNut     | 100 | 100 | 0  | 1 | 5   | A |
| 42101000 | Almonds, unroasted                                  | 4000_LegNut     | 100 | 100 | 0  | 1 | 5   | A |
| 42101210 | Almonds, dry roasted, without salt                  | 4000_LegNut     | 100 | 100 | 0  | 1 | 5   | A |
| 42111040 | Peanuts, unroasted                                  | 4000_LegNut     | 100 | 100 | 0  | 1 | 5   | A |
| 43101000 | Pumpkin and/or squash seeds, hulled, unroasted      | 4000_LegNut     | 100 | 100 | 0  | 1 | 5   | A |
| 43102000 | Sunflower seeds, plain, unsalted                    | 4000_LegNut     | 100 | 100 | 0  | 1 | 5   | A |
| 43102100 | Sunflower seeds, plain, salted                      | 4000_LegNut     | 100 | 100 | 0  | 1 | 4.5 | B |
| 43102110 | Sunflower seeds, hulled, roasted, without salt      | 4000_LegNut     | 100 | 100 | 0  | 3 | 5   | A |
| 43102400 | Sunflower seeds, NFS                                | 4000_LegNut     | 100 | 100 | 0  | 1 | 5   | A |
| 43103050 | Sesame seeds, whole seed                            | 4000_LegNut     | 100 | 100 | 0  | 1 | 5   | A |
| 43104000 | Flax seeds                                          | 4000_LegNut     | 100 | 100 | 0  | 1 | 5   | A |
| 43107000 | Mixed seeds                                         | 4000_LegNut     | 100 | 100 | 0  | 1 | 5   | A |
| 43108010 | Chia seeds                                          | 4000_LegNut     | 100 | 100 | 0  | 1 | 5   | A |
| 41301020 | Cowpeas, dry, cooked, fat not added in cooking      | 4000_LegNut     | 100 | 99  | 1  | 1 | 5   | A |
| 41103020 | Lima beans, dry, cooked, fat not added in cooking   | 4000_LegNut     | 100 | 98  | 2  | 1 | 5   | A |
| 41305000 | Lentils, from dried, no added fat                   | 4000_LegNut     | 100 | 98  | 2  | 1 | 5   | A |
| 42110050 | Mixed nuts, unroasted                               | 4000_LegNut     | 99  | 100 | -1 | 1 | 5   | A |
| 43101050 | Pumpkin seeds, NFS                                  | 4000_LegNut     | 99  | 100 | -1 | 1 | 5   | A |
| 43101150 | Pumpkin seeds, unsalted                             | 4000_LegNut     | 99  | 100 | -1 | 1 | 5   | A |
| 41304991 | Lentils, dry, cooked, made with oil                 | 4000_LegNut     | 98  | 100 | -2 | 1 | 5   | A |
| 42110500 | Mixed nuts, in shell                                | 4000_LegNut     | 98  | 100 | -2 | 1 | 4.5 | A |
| 43102300 | Sunflower seeds, flavored                           | 4000_LegNut     | 98  | 100 | -2 | 1 | 4.5 | C |
| 42114130 | Pistachio nuts, NFS                                 | 4000_LegNut     | 98  | 99  | -1 | 1 | 5   | A |
| 41102020 | Black beans, from dried, no added fat               | 4000_LegNut     | 98  | 95  | 3  | 1 | 5   | A |
| 42202200 | Peanut butter, vitamin and mineral fortified        | 4000_LegNut     | 97  | 100 | -3 | 3 | 3.5 | C |
| 42107000 | Hazelnuts                                           | 4000_LegNut     | 97  | 99  | -2 | 1 | 5   | A |
| 41304980 | Lentils, dry, cooked, NS as to fat added in cooking | 4000_LegNut     | 97  | 98  | -1 | 1 | 5   | A |
| 41108000 | Mung beans, dry, cooked, fat not added in cooking   | 4000_LegNut     | 97  | 91  | 6  | 1 | 5   | A |
| 42114145 | Pistachio nuts, unsalted                            | 4000_LegNut     | 96  | 98  | -2 | 1 | 5   | A |
| 41106020 | Kidney beans, from dried, no added fat              | 4000_LegNut     | 96  | 94  | 2  | 1 | 5   | A |
| 43102005 | Sunflower seeds, hulled, unroasted, salted          | 4000_LegNut     | 95  | 100 | -5 | 3 | 4.5 | B |
| 42113000 | Pine nuts                                           | 4000_LegNut     | 95  | 98  | -3 | 1 | 4   | B |

|          |                                                                                    |             |    |     |    |   |     |   |
|----------|------------------------------------------------------------------------------------|-------------|----|-----|----|---|-----|---|
| 43103200 | Sesame paste (sesame butter made from whole seeds)                                 | 4000_LegNut | 95 | 97  | -2 | 1 | 4.5 | A |
| 43103300 | Tahini                                                                             | 4000_LegNut | 95 | 97  | -2 | 1 | 4.5 | A |
| 42110020 | Mixed nuts, without salt                                                           | 4000_LegNut | 95 | 96  | -1 | 1 | 4.5 | A |
| 41304993 | Lentils, dry, cooked, made with margarine                                          | 4000_LegNut | 95 | 95  | 0  | 2 | 5   | A |
| 41109000 | Mungo beans, cooked, fat not added in cooking                                      | 4000_LegNut | 95 | 94  | 1  | 1 | 5   | A |
| 41102120 | Black, brown, or Bayo beans, canned, drained, low sodium, fat not added in cooking | 4000_LegNut | 95 | 93  | 2  | 3 | 5   | A |
| 41104020 | Pinto beans, from dried, no added fat                                              | 4000_LegNut | 95 | 92  | 3  | 1 | 5   | A |
| 42101130 | Almonds, unsalted                                                                  | 4000_LegNut | 94 | 99  | -5 | 3 | 5   | A |
| 43102200 | Sunflower seeds, hulled, dry roasted                                               | 4000_LegNut | 94 | 98  | -4 | 3 | 4.5 | C |
| 42114140 | Pistachio nuts, salted                                                             | 4000_LegNut | 94 | 96  | -2 | 1 | 5   | C |
| 43103000 | Sesame seeds                                                                       | 4000_LegNut | 94 | 96  | -2 | 1 | 5   | A |
| 41304990 | Lentils, from dried, fat added                                                     | 4000_LegNut | 94 | 95  | -1 | 1 | 5   | A |
| 41106520 | Yellow, canary, or Peruvian beans, dry, cooked, fat not added in cooking           | 4000_LegNut | 94 | 90  | 4  | 1 | 5   | A |
| 41202505 | Beans and tomatoes, no added fat                                                   | 4000_LegNut | 94 | 90  | 4  | 1 | 5   | A |
| 42110160 | Mixed nuts, without peanuts, unsalted                                              | 4000_LegNut | 93 | 100 | -7 | 3 | 4.5 | A |
| 42101120 | Almonds, lightly salted                                                            | 4000_LegNut | 93 | 98  | -5 | 3 | 5   | A |
| 41106000 | Red kidney beans, dry, cooked, NS as to fat added in cooking                       | 4000_LegNut | 93 | 95  | -2 | 1 | 5   | A |
| 41301000 | Cowpeas, dry, cooked, NS as to fat added in cooking                                | 4000_LegNut | 93 | 95  | -2 | 1 | 5   | A |
| 41301010 | Blackeyed peas, from dried                                                         | 4000_LegNut | 93 | 95  | -2 | 1 | 5   | A |
| 42500100 | Trail mix with nuts                                                                | 4000_LegNut | 93 | 95  | -2 | 1 | 4.5 | B |
| 41102000 | Black, brown, or Bayo beans, dry, cooked, NS as to fat added in cooking            | 4000_LegNut | 93 | 94  | -1 | 1 | 5   | A |
| 41102010 | Black beans, from dried, fat added                                                 | 4000_LegNut | 93 | 94  | -1 | 1 | 5   | A |
| 41305020 | Lentils, from canned                                                               | 4000_LegNut | 93 | 94  | -1 | 1 | 5   | A |
| 42102000 | Brazil nuts                                                                        | 4000_LegNut | 93 | 94  | -1 | 1 | 4   | B |
| 41101020 | Beans, from dried, NS as to type, no added fat                                     | 4000_LegNut | 93 | 89  | 4  | 1 | 5   | A |
| 41303000 | Split peas, from dried, no added fat                                               | 4000_LegNut | 93 | 87  | 6  | 1 | 5   | A |
| 42116000 | Walnuts, excluding honey roasted                                                   | 4000_LegNut | 92 | 99  | -7 | 1 | 4.5 | A |
| 42116050 | Walnuts                                                                            | 4000_LegNut | 92 | 98  | -6 | 1 | 4.5 | A |
| 42116055 | Walnuts, roasted, without salt                                                     | 4000_LegNut | 92 | 98  | -6 | 1 | 4.5 | A |
| 41103000 | Lima beans, dry, cooked, NS as to fat added in cooking                             | 4000_LegNut | 92 | 93  | -1 | 1 | 5   | A |
| 41103011 | Lima beans, dry, cooked, made with oil                                             | 4000_LegNut | 92 | 93  | -1 | 1 | 5   | A |
| 42105000 | Chestnuts                                                                          | 4000_LegNut | 92 | 93  | -1 | 1 | 4.5 | B |
| 42111210 | Peanuts, dry roasted, unsalted                                                     | 4000_LegNut | 92 | 93  | -1 | 1 | 5   | A |
| 41101120 | White beans, from dried, no added fat                                              | 4000_LegNut | 92 | 89  | 3  | 1 | 5   | A |
| 41102220 | Fava beans, dry, cooked, fat not added in cooking                                  | 4000_LegNut | 92 | 88  | 4  | 1 | 5   | A |
| 42110120 | Mixed nuts, with peanuts, unsalted                                                 | 4000_LegNut | 91 | 97  | -6 | 3 | 5   | A |
| 41107010 | Soybeans, cooked                                                                   | 4000_LegNut | 91 | 95  | -4 | 1 | 5   | A |
| 41107020 | Soybeans, dry, cooked, NS as to fat added in cooking                               | 4000_LegNut | 91 | 95  | -4 | 1 | 5   | A |

|          |                                                                                         |             |    |    |    |   |     |   |
|----------|-----------------------------------------------------------------------------------------|-------------|----|----|----|---|-----|---|
| 42112000 | Pecans, NFS                                                                             | 4000_LegNut | 91 | 94 | -3 | 1 | 4.5 | A |
| 41103010 | Lima beans, from dried                                                                  | 4000_LegNut | 91 | 93 | -2 | 1 | 5   | A |
| 41106011 | Red kidney beans, dry, cooked, made with oil                                            | 4000_LegNut | 91 | 93 | -2 | 1 | 5   | A |
| 41101000 | Beans, dry, cooked, NS as to type and as to fat added in cooking                        | 4000_LegNut | 91 | 92 | -1 | 1 | 5   | A |
| 41102011 | Black, brown, or Bayo beans, dry, cooked, made with oil                                 | 4000_LegNut | 91 | 92 | -1 | 1 | 5   | A |
| 41102110 | Black beans, from canned, reduced sodium                                                | 4000_LegNut | 91 | 92 | -1 | 3 | 5   | A |
| 41104000 | Pinto, calico, or red Mexican beans, dry, cooked, NS as to fat added in cooking         | 4000_LegNut | 91 | 92 | -1 | 1 | 5   | A |
| 41104010 | Pinto beans, from dried, fat added                                                      | 4000_LegNut | 91 | 92 | -1 | 1 | 5   | A |
| 41104011 | Pinto, calico, or red Mexican beans, dry, cooked, made with oil                         | 4000_LegNut | 91 | 92 | -1 | 1 | 5   | A |
| 41106010 | Kidney beans, from dried, fat added                                                     | 4000_LegNut | 91 | 92 | -1 | 1 | 5   | A |
| 41202500 | Beans and tomatoes, NS as to fat added in cooking                                       | 4000_LegNut | 91 | 92 | -1 | 1 | 5   | A |
| 43101100 | Pumpkin seeds, salted                                                                   | 4000_LegNut | 91 | 92 | -1 | 1 | 4.5 | C |
| 41302020 | Chickpeas, from dried, no added fat                                                     | 4000_LegNut | 91 | 88 | 3  | 1 | 5   | A |
| 42112100 | Pecans, unroasted                                                                       | 4000_LegNut | 90 | 93 | -3 | 1 | 4.5 | A |
| 41102100 | Black, brown, or Bayo beans, canned, drained, low sodium, NS as to fat added in cooking | 4000_LegNut | 90 | 92 | -2 | 3 | 5   | A |
| 42100050 | Nuts, NFS                                                                               | 4000_LegNut | 90 | 92 | -2 | 1 | 4.5 | B |
| 42110000 | Mixed nuts, NFS                                                                         | 4000_LegNut | 90 | 92 | -2 | 1 | 4.5 | B |
| 42110100 | Mixed nuts, with peanuts, salted                                                        | 4000_LegNut | 90 | 92 | -2 | 1 | 4.5 | B |
| 41103013 | Lima beans, dry, cooked, made with margarine                                            | 4000_LegNut | 90 | 90 | 0  | 2 | 5   | A |
| 41108020 | Mung beans, dry, cooked, NS as to fat added in cooking                                  | 4000_LegNut | 90 | 90 | 0  | 1 | 5   | A |
| 41103060 | Pink beans, dry, cooked, fat not added in cooking                                       | 4000_LegNut | 90 | 89 | 1  | 1 | 5   | A |
| 41310310 | Stewed blackeye peas or cowpeas, Puerto Rican style                                     | 4000_LegNut | 90 | 89 | 1  | 1 | 5   | A |
| 41106120 | Red kidney beans, canned, drained, low sodium, fat not added in cooking                 | 4000_LegNut | 90 | 88 | 2  | 3 | 5   | A |
| 42200510 | Almond butter, lower sodium                                                             | 4000_LegNut | 89 | 94 | -5 | 3 | 4.5 | A |
| 42111110 | Peanuts, roasted, unsalted                                                              | 4000_LegNut | 89 | 92 | -3 | 3 | 5   | A |
| 42104000 | Cashews, NFS                                                                            | 4000_LegNut | 89 | 91 | -2 | 1 | 4   | B |
| 42104205 | Cashew nuts, dry roasted, without salt                                                  | 4000_LegNut | 89 | 91 | -2 | 1 | 4   | B |
| 41101110 | White beans, from dried, fat added                                                      | 4000_LegNut | 89 | 90 | -1 | 1 | 5   | A |
| 41106013 | Red kidney beans, dry, cooked, made with margarine                                      | 4000_LegNut | 89 | 90 | -1 | 2 | 5   | A |
| 41106500 | Yellow, canary, or Peruvian beans, dry, cooked, NS as to fat added in cooking           | 4000_LegNut | 89 | 90 | -1 | 1 | 5   | A |
| 41202510 | Beans and tomatoes, fat added                                                           | 4000_LegNut | 89 | 90 | -1 | 1 | 4.5 | A |
| 41106511 | Yellow, canary, or Peruvian beans, dry, cooked, made with oil                           | 4000_LegNut | 89 | 89 | 0  | 1 | 5   | A |
| 41108010 | Mung beans, cooked                                                                      | 4000_LegNut | 89 | 89 | 0  | 1 | 5   | A |
| 41303011 | Green or yellow split peas, dry, cooked, made with oil                                  | 4000_LegNut | 89 | 89 | 0  | 1 | 5   | A |
| 41102013 | Black, brown, or Bayo beans, dry, cooked, made with margarine                           | 4000_LegNut | 89 | 88 | 1  | 2 | 5   | A |
| 41104013 | Pinto, calico, or red Mexican beans, dry, cooked, made with margarine                   | 4000_LegNut | 89 | 88 | 1  | 2 | 5   | A |

|          |                                                                                                |             |    |    |    |   |     |   |
|----------|------------------------------------------------------------------------------------------------|-------------|----|----|----|---|-----|---|
| 41303020 | Green or yellow split peas, dry, cooked, NS as to fat added in cooking                         | 4000_LegNut | 89 | 88 | 1  | 1 | 5   | A |
| 41102080 | Black beans, from canned, no added fat                                                         | 4000_LegNut | 89 | 86 | 3  | 3 | 5   | A |
| 41303500 | Stewed green peas, Puerto Rican style                                                          | 4000_LegNut | 89 | 85 | 4  | 1 | 5   | A |
| 42101200 | Almonds, dry roasted, salted                                                                   | 4000_LegNut | 88 | 91 | -3 | 3 | 5   | C |
| 42104050 | Cashews, unroasted                                                                             | 4000_LegNut | 88 | 91 | -3 | 1 | 4   | B |
| 42104110 | Cashews, unsalted                                                                              | 4000_LegNut | 88 | 91 | -3 | 1 | 4   | B |
| 41101100 | White beans, dry, cooked, NS as to fat added in cooking                                        | 4000_LegNut | 88 | 90 | -2 | 1 | 5   | A |
| 41101111 | White beans, dry, cooked, made with oil                                                        | 4000_LegNut | 88 | 90 | -2 | 1 | 5   | A |
| 41103050 | Pink beans, dry, cooked, NS as to fat added in cooking                                         | 4000_LegNut | 88 | 90 | -2 | 1 | 5   | A |
| 41103070 | Pink beans, cooked                                                                             | 4000_LegNut | 88 | 89 | -1 | 1 | 5   | A |
| 41106510 | Peruvian beans, from dried                                                                     | 4000_LegNut | 88 | 87 | 1  | 1 | 5   | A |
| 41303010 | Split peas, from dried, fat added                                                              | 4000_LegNut | 88 | 87 | 1  | 1 | 5   | A |
| 41303013 | Green or yellow split peas, dry, cooked, made with margarine                                   | 4000_LegNut | 88 | 86 | 2  | 2 | 5   | A |
| 42200500 | Almond butter                                                                                  | 4000_LegNut | 87 | 92 | -5 | 3 | 4.5 | A |
| 41106100 | Red kidney beans, canned, drained, low sodium, NS as to fat added in cooking                   | 4000_LegNut | 87 | 90 | -3 | 3 | 5   | A |
| 42101100 | Almonds, roasted                                                                               | 4000_LegNut | 87 | 90 | -3 | 3 | 5   | A |
| 42101110 | Almonds, salted                                                                                | 4000_LegNut | 87 | 90 | -3 | 3 | 5   | A |
| 41106110 | Kidney beans, from canned, reduced sodium                                                      | 4000_LegNut | 87 | 89 | -2 | 3 | 5   | A |
| 41102030 | Black, brown, or Bayo beans, canned, drained, NS as to fat added in cooking                    | 4000_LegNut | 87 | 88 | -1 | 3 | 5   | A |
| 41102040 | Black beans, from canned, fat added                                                            | 4000_LegNut | 87 | 88 | -1 | 3 | 5   | A |
| 41102050 | Black, brown, or Bayo beans, canned, drained, made with oil                                    | 4000_LegNut | 87 | 88 | -1 | 3 | 5   | A |
| 42202010 | Peanut butter, lower sodium                                                                    | 4000_LegNut | 87 | 88 | -1 | 1 | 3.5 | C |
| 41101113 | White beans, dry, cooked, made with margarine                                                  | 4000_LegNut | 87 | 87 | 0  | 2 | 5   | A |
| 41108030 | Mung beans, canned, drained, NS as to fat added in cooking                                     | 4000_LegNut | 87 | 87 | 0  | 1 | 5   | A |
| 41304970 | Lentils, NFS                                                                                   | 4000_LegNut | 87 | 87 | 0  | 1 | 5   | A |
| 41106540 | Yellow, canary, or Peruvian beans, canned, drained, fat added in cooking, NS as to type of fat | 4000_LegNut | 87 | 86 | 1  | 1 | 5   | A |
| 41420010 | Soybean curd                                                                                   | 4000_LegNut | 86 | 94 | -8 | 3 | 4   | A |
| 42110150 | Mixed nuts, without peanuts, salted                                                            | 4000_LegNut | 86 | 92 | -6 | 3 | 4   | C |
| 42110110 | Mixed nuts, with peanuts, lightly salted                                                       | 4000_LegNut | 86 | 91 | -5 | 3 | 4.5 | A |
| 42114142 | Pistachio nuts, lightly salted                                                                 | 4000_LegNut | 86 | 90 | -4 | 3 | 5   | A |
| 42203200 | Soy nut butter                                                                                 | 4000_LegNut | 86 | 89 | -3 | 3 | 3   | C |
| 41106150 | Kidney beans, from fast food / restaurant                                                      | 4000_LegNut | 86 | 88 | -2 | 1 | 5   | A |
| 41102150 | Black beans, from fast food / restaurant                                                       | 4000_LegNut | 86 | 87 | -1 | 1 | 5   | A |
| 41102210 | Fava beans, cooked                                                                             | 4000_LegNut | 86 | 87 | -1 | 1 | 5   | A |
| 41104120 | Pinto, calico, or red Mexican beans, canned, drained, low sodium, fat not added in cooking     | 4000_LegNut | 86 | 86 | 0  | 3 | 5   | A |
| 41104200 | Pinto beans, from fast food / restaurant                                                       | 4000_LegNut | 86 | 86 | 0  | 1 | 5   | A |
| 41300990 | Blackeyed peas, NFS                                                                            | 4000_LegNut | 86 | 86 | 0  | 1 | 5   | A |



|          |                                                                                                 |             |    |    |    |   |     |   |
|----------|-------------------------------------------------------------------------------------------------|-------------|----|----|----|---|-----|---|
| 41106513 | Yellow, canary, or Peruvian beans, dry, cooked, made with margarine                             | 4000_LegNut | 86 | 85 | 1  | 2 | 5   | A |
| 41302120 | Chickpeas, canned, drained, low sodium, fat not added in cooking                                | 4000_LegNut | 86 | 85 | 1  | 3 | 5   | A |
| 41103100 | Pink beans, canned, drained, fat not added in cooking                                           | 4000_LegNut | 86 | 83 | 3  | 1 | 5   | A |
| 42112210 | Pecans, unsalted                                                                                | 4000_LegNut | 85 | 90 | -5 | 3 | 4.5 | A |
| 41410010 | Soy nuts                                                                                        | 4000_LegNut | 85 | 89 | -4 | 3 | 5   | C |
| 41102200 | Fava beans, dry, cooked, NS as to fat added in cooking                                          | 4000_LegNut | 85 | 87 | -2 | 1 | 5   | A |
| 41103090 | Pink beans, canned, drained, fat added in cooking                                               | 4000_LegNut | 85 | 86 | -1 | 1 | 5   | A |
| 41101990 | Black beans, NFS                                                                                | 4000_LegNut | 85 | 85 | 0  | 1 | 5   | A |
| 41102990 | Lima beans, NFS                                                                                 | 4000_LegNut | 85 | 85 | 0  | 1 | 5   | A |
| 41302000 | Chickpeas, dry, cooked, NS as to fat added in cooking                                           | 4000_LegNut | 85 | 85 | 0  | 1 | 5   | A |
| 41302010 | Chickpeas, from dried, fat added                                                                | 4000_LegNut | 85 | 85 | 0  | 1 | 5   | A |
| 41302011 | Chickpeas, dry, cooked, made with oil                                                           | 4000_LegNut | 85 | 85 | 0  | 1 | 5   | A |
| 41103990 | Pinto beans, NFS                                                                                | 4000_LegNut | 85 | 84 | 1  | 1 | 5   | A |
| 42110015 | Mixed nuts, salted                                                                              | 4000_LegNut | 84 | 89 | -5 | 3 | 4   | C |
| 41104100 | Pinto, calico, or red Mexican beans, canned, drained, low sodium, NS as to fat added in cooking | 4000_LegNut | 84 | 87 | -3 | 3 | 5   | A |
| 41104110 | Pinto beans, from canned, reduced sodium                                                        | 4000_LegNut | 84 | 87 | -3 | 3 | 5   | A |
| 42110200 | Mixed nuts, dry roasted                                                                         | 4000_LegNut | 84 | 87 | -3 | 3 | 4.5 | C |
| 41102260 | Fava beans, canned, drained, fat added in cooking                                               | 4000_LegNut | 84 | 85 | -1 | 1 | 5   | A |
| 41101090 | White beans, NFS                                                                                | 4000_LegNut | 84 | 84 | 0  | 1 | 5   | A |
| 59003000 | Meat substitute, cereal- and vegetable protein-based, fried                                     | 4000_LegNut | 84 | 83 | 1  | 1 | 4.5 | A |
| 41101070 | Beans, from canned, NS as to type, no added fat                                                 | 4000_LegNut | 84 | 82 | 2  | 3 | 5   | A |
| 41106080 | Kidney beans, from canned, no added fat                                                         | 4000_LegNut | 84 | 82 | 2  | 3 | 5   | A |
| 41221010 | Baked beans, low sodium                                                                         | 4000_LegNut | 83 | 86 | -3 | 3 | 4.5 | A |
| 41302100 | Chickpeas, canned, drained, low sodium, NS as to fat added in cooking                           | 4000_LegNut | 83 | 85 | -2 | 3 | 5   | A |
| 41302110 | Chickpeas, from canned, reduced sodium                                                          | 4000_LegNut | 83 | 85 | -2 | 3 | 5   | A |
| 41101080 | Beans, from fast food / restaurant, NS as to type                                               | 4000_LegNut | 83 | 84 | -1 | 1 | 5   | A |
| 41105990 | Kidney beans, NFS                                                                               | 4000_LegNut | 83 | 83 | 0  | 1 | 5   | A |
| 41100990 | Beans, NFS                                                                                      | 4000_LegNut | 83 | 82 | 1  | 1 | 5   | A |
| 41101010 | Beans, from dried, NS as to type, fat added                                                     | 4000_LegNut | 83 | 82 | 1  | 1 | 5   | A |
| 41221000 | Baked beans, reduced sodium                                                                     | 4000_LegNut | 83 | 82 | 1  | 3 | 5   | A |
| 41304992 | Lentils, dry, cooked, made with animal fat or meat drippings                                    | 4000_LegNut | 83 | 78 | 5  | 1 | 5   | A |
| 41101050 | Beans, canned, drained, NS as to type and as to fat added in cooking                            | 4000_LegNut | 82 | 84 | -2 | 3 | 5   | A |
| 41104030 | Pinto, calico, or red Mexican beans, canned, drained, NS as to fat added in cooking             | 4000_LegNut | 82 | 84 | -2 | 3 | 5   | A |
| 41104050 | Pinto, calico, or red Mexican beans, canned, drained, made with oil                             | 4000_LegNut | 82 | 84 | -2 | 3 | 5   | A |
| 41106050 | Red kidney beans, canned, drained, made with oil                                                | 4000_LegNut | 82 | 84 | -2 | 3 | 5   | A |
| 42111010 | Peanuts, in shell, NFS (shell not eaten)                                                        | 4000_LegNut | 82 | 84 | -2 | 3 | 4.5 | C |
| 42111100 | Peanuts, roasted, salted                                                                        | 4000_LegNut | 82 | 84 | -2 | 3 | 4.5 | C |

|          |                                                                         |             |    |    |    |   |     |   |
|----------|-------------------------------------------------------------------------|-------------|----|----|----|---|-----|---|
| 42111205 | Peanuts, dry roasted, lightly salted                                    | 4000_LegNut | 82 | 84 | -2 | 3 | 5   | B |
| 41106040 | Kidney beans, from canned, fat added                                    | 4000_LegNut | 82 | 83 | -1 | 3 | 5   | A |
| 42202100 | Peanut butter, lower sodium and lower sugar                             | 4000_LegNut | 82 | 83 | -1 | 2 | 4   | C |
| 41104080 | Pinto beans, from canned, no added fat                                  | 4000_LegNut | 82 | 81 | 1  | 3 | 5   | A |
| 41302013 | Chickpeas, dry, cooked, made with margarine                             | 4000_LegNut | 82 | 81 | 1  | 2 | 5   | A |
| 41302080 | Chickpeas, from canned, no added fat                                    | 4000_LegNut | 82 | 81 | 1  | 3 | 5   | A |
| 41104040 | Pinto beans, from canned, fat added                                     | 4000_LegNut | 81 | 84 | -3 | 3 | 5   | A |
| 42502000 | Nut mixture with seeds                                                  | 4000_LegNut | 81 | 82 | -1 | 3 | 5   | A |
| 41210200 | Black beans, Cuban style                                                | 4000_LegNut | 81 | 80 | 1  | 1 | 4.5 | A |
| 41205015 | Refried beans, fat not added in cooking                                 | 4000_LegNut | 81 | 79 | 2  | 3 | 5   | A |
| 41102070 | Black, brown, or Bayo beans, canned, drained, made with margarine       | 4000_LegNut | 80 | 82 | -2 | 3 | 5   | A |
| 41302030 | Chickpeas, canned, drained, NS as to fat added in cooking               | 4000_LegNut | 80 | 82 | -2 | 3 | 5   | A |
| 41302050 | Chickpeas, canned, drained, made with oil                               | 4000_LegNut | 80 | 82 | -2 | 3 | 5   | A |
| 42104100 | Cashews, salted                                                         | 4000_LegNut | 80 | 82 | -2 | 1 | 3.5 | C |
| 41101200 | White beans, canned, drained, low sodium, NS as to fat added in cooking | 4000_LegNut | 80 | 81 | -1 | 3 | 5   | A |
| 41302040 | Chickpeas, from canned, fat added                                       | 4000_LegNut | 80 | 81 | -1 | 3 | 5   | A |
| 41311000 | Papad, grilled or broiled                                               | 4000_LegNut | 80 | 81 | -1 | 3 | 4.5 | E |
| 42500000 | Trail mix, NFS                                                          | 4000_LegNut | 80 | 80 | 0  | 1 | 4   | C |
| 42501000 | Trail mix with nuts and fruit                                           | 4000_LegNut | 80 | 80 | 0  | 1 | 4   | C |
| 41104250 | Pinto beans with meat                                                   | 4000_LegNut | 80 | 78 | 2  | 1 | 5   | A |
| 41301990 | Chickpeas, NFS                                                          | 4000_LegNut | 80 | 78 | 2  | 1 | 5   | A |
| 41101210 | White beans, from canned, reduced sodium                                | 4000_LegNut | 79 | 81 | -2 | 3 | 5   | A |
| 41101150 | White beans, canned, drained, made with oil                             | 4000_LegNut | 79 | 80 | -1 | 3 | 5   | A |
| 41205040 | Refried beans, from canned, reduced sodium                              | 4000_LegNut | 79 | 80 | -1 | 3 | 5   | A |
| 42111000 | Peanuts, NFS                                                            | 4000_LegNut | 79 | 80 | -1 | 3 | 4.5 | C |
| 42111200 | Peanuts, dry roasted, salted                                            | 4000_LegNut | 79 | 80 | -1 | 3 | 4.5 | C |
| 41101220 | White beans, canned, drained, low sodium, fat not added in cooking      | 4000_LegNut | 79 | 77 | 2  | 3 | 5   | A |
| 41102170 | Black beans with meat                                                   | 4000_LegNut | 79 | 77 | 2  | 1 | 5   | A |
| 41106170 | Kidney beans with meat                                                  | 4000_LegNut | 79 | 77 | 2  | 1 | 5   | A |
| 41421010 | Soybean curd, deep fried                                                | 4000_LegNut | 78 | 85 | -7 | 3 | 4.5 | A |
| 41203020 | Kidney bean salad                                                       | 4000_LegNut | 78 | 81 | -3 | 2 | 5   | A |
| 41101140 | White beans, from canned, fat added                                     | 4000_LegNut | 78 | 80 | -2 | 3 | 5   | A |
| 41205011 | Refried beans, made with oil                                            | 4000_LegNut | 78 | 78 | 0  | 2 | 5   | A |
| 41205016 | Refried beans, NS as to fat added in cooking                            | 4000_LegNut | 78 | 78 | 0  | 2 | 5   | A |
| 42111030 | Peanuts, boiled                                                         | 4000_LegNut | 78 | 78 | 0  | 3 | 4.5 | C |
| 42104105 | Cashews, lightly salted                                                 | 4000_LegNut | 77 | 81 | -4 | 3 | 3.5 | C |
| 42202130 | Peanut butter, lower sugar                                              | 4000_LegNut | 77 | 80 | -3 | 3 | 4   | C |
| 41101060 | Beans, from canned, NS as to type, fat added                            | 4000_LegNut | 77 | 77 | 0  | 3 | 5   | A |

|          |                                                                                          |             |    |    |     |   |     |   |
|----------|------------------------------------------------------------------------------------------|-------------|----|----|-----|---|-----|---|
| 41205013 | Refried beans, made with margarine                                                       | 4000_LegNut | 77 | 76 | 1   | 2 | 5   | A |
| 41101180 | White beans, from canned, no added fat                                                   | 4000_LegNut | 77 | 75 | 2   | 3 | 5   | A |
| 41207030 | Beans, dry, cooked with ground beef                                                      | 4000_LegNut | 77 | 75 | 2   | 1 | 4.5 | A |
| 41811200 | Fish stick, meatless                                                                     | 4000_LegNut | 76 | 89 | -13 | 4 | 4   | C |
| 41210110 | Stewed dry lima beans, Puerto Rican style                                                | 4000_LegNut | 76 | 72 | 4   | 2 | 4   | B |
| 41102012 | Black, brown, or Bayo beans, dry, cooked, made with animal fat or meat drippings         | 4000_LegNut | 76 | 71 | 5   | 1 | 5   | A |
| 41103012 | Lima beans, dry, cooked, made with animal fat or meat drippings                          | 4000_LegNut | 76 | 71 | 5   | 1 | 5   | A |
| 41104012 | Pinto, calico, or red Mexican beans, dry, cooked, made with animal fat or meat drippings | 4000_LegNut | 76 | 71 | 5   | 1 | 5   | A |
| 41812000 | Sandwich spread, meat substitute type                                                    | 4000_LegNut | 75 | 89 | -14 | 4 | 3.5 | C |
| 41104070 | Pinto, calico, or red Mexican beans, canned, drained, made with margarine                | 4000_LegNut | 75 | 78 | -3  | 3 | 5   | A |
| 42202150 | Peanut butter, reduced fat                                                               | 4000_LegNut | 75 | 78 | -3  | 3 | 4   | C |
| 41210150 | Stewed pink beans with white potatoes and ham, Puerto Rican style                        | 4000_LegNut | 75 | 72 | 3   | 1 | 4   | B |
| 41106012 | Red kidney beans, dry, cooked, made with animal fat or meat drippings                    | 4000_LegNut | 75 | 71 | 4   | 1 | 5   | A |
| 41303012 | Green or yellow split peas, dry, cooked, made with animal fat or meat drippings          | 4000_LegNut | 75 | 68 | 7   | 1 | 5   | A |
| 42104200 | Cashew nuts, dry roasted, salted                                                         | 4000_LegNut | 74 | 78 | -4  | 3 | 3   | D |
| 42101350 | Almonds, honey roasted                                                                   | 4000_LegNut | 74 | 76 | -2  | 3 | 2.5 | C |
| 42110300 | Mixed nuts, honey roasted                                                                | 4000_LegNut | 74 | 76 | -2  | 3 | 2.5 | C |
| 41205017 | Refried beans, from fast food / restaurant                                               | 4000_LegNut | 74 | 72 | 2   | 1 | 4.5 | A |
| 41101112 | White beans, dry, cooked, made with animal fat or meat drippings                         | 4000_LegNut | 74 | 70 | 4   | 1 | 5   | A |
| 41208100 | Beans with meat, NS as to type                                                           | 4000_LegNut | 74 | 70 | 4   | 1 | 5   | A |
| 41106512 | Yellow, canary, or Peruvian beans, dry, cooked, made with animal fat or meat drippings   | 4000_LegNut | 74 | 69 | 5   | 1 | 5   | A |
| 41205010 | Refried beans                                                                            | 4000_LegNut | 73 | 72 | 1   | 3 | 4.5 | A |
| 42111500 | Peanuts, honey roasted                                                                   | 4000_LegNut | 73 | 72 | 1   | 3 | 4   | C |
| 41210100 | Stewed red beans, Puerto Rican style                                                     | 4000_LegNut | 73 | 70 | 3   | 2 | 4   | B |
| 42200600 | Almond paste                                                                             | 4000_LegNut | 72 | 78 | -6  | 3 | 2.5 | C |
| 42201000 | Cashew butter                                                                            | 4000_LegNut | 72 | 76 | -4  | 3 | 2.5 | C |
| 42202000 | Peanut butter                                                                            | 4000_LegNut | 72 | 75 | -3  | 3 | 3   | D |
| 42502100 | Trail mix with pretzels, cereal, or granola                                              | 4000_LegNut | 72 | 73 | -1  | 2 | 4   | C |
| 41102060 | Black, brown, or Bayo beans, canned, drained, made with animal fat or meat drippings     | 4000_LegNut | 72 | 68 | 4   | 3 | 5   | A |
| 41812600 | Vegetarian, fillet                                                                       | 4000_LegNut | 71 | 84 | -13 | 4 | 4   | C |
| 42101300 | Almonds, flavored                                                                        | 4000_LegNut | 71 | 79 | -8  | 4 | 5   | C |
| 42112200 | Pecans, salted                                                                           | 4000_LegNut | 71 | 73 | -2  | 3 | 4   | B |
| 41310160 | Stewed chickpeas, with potatoes, Puerto Rican style                                      | 4000_LegNut | 71 | 66 | 5   | 1 | 5   | B |
| 41302012 | Chickpeas, dry, cooked, made with animal fat or meat drippings                           | 4000_LegNut | 71 | 65 | 6   | 1 | 5   | A |
| 42501500 | Trail mix with chocolate                                                                 | 4000_LegNut | 70 | 72 | -2  | 2 | 3.5 | D |
| 41205020 | Refried beans with cheese                                                                | 4000_LegNut | 70 | 69 | 1   | 3 | 4.5 | A |

|          |                                                                                              |             |    |    |     |   |     |   |
|----------|----------------------------------------------------------------------------------------------|-------------|----|----|-----|---|-----|---|
| 41812900 | Vegetarian meat loaf                                                                         | 4000_LegNut | 68 | 78 | -10 | 4 | 4   | A |
| 42109105 | Macadamia nuts, roasted, without salt                                                        | 4000_LegNut | 68 | 68 | 0   | 3 | 3.5 | C |
| 41104060 | Pinto, calico, or red Mexican beans, canned, drained, made with animal fat or meat drippings | 4000_LegNut | 68 | 65 | 3   | 3 | 5   | A |
| 41205012 | Refried beans, made with animal fat or meat drippings                                        | 4000_LegNut | 68 | 64 | 4   | 2 | 4.5 | A |
| 41310150 | Stewed chickpeas, Puerto Rican style                                                         | 4000_LegNut | 68 | 63 | 5   | 1 | 3.5 | A |
| 42116100 | Walnuts, honey roasted                                                                       | 4000_LegNut | 67 | 71 | -4  | 3 | 2   | C |
| 42109000 | Macadamia nuts, unroasted                                                                    | 4000_LegNut | 67 | 68 | -1  | 3 | 3.5 | C |
| 42109100 | Macadamia nuts                                                                               | 4000_LegNut | 67 | 68 | -1  | 3 | 3.5 | C |
| 41306000 | Loaf, lentil                                                                                 | 4000_LegNut | 67 | 67 | 0   | 1 | 3.5 | A |
| 41310100 | Stewed pigeon peas, Puerto Rican style (Gandules guisados, Gandur, Gandules)                 | 4000_LegNut | 67 | 62 | 5   | 1 | 4   | C |
| 42112300 | Pecans, honey roasted                                                                        | 4000_LegNut | 66 | 67 | -1  | 3 | 2.5 | C |
| 41304130 | Cowpeas, dry, cooked with pork                                                               | 4000_LegNut | 66 | 64 | 2   | 2 | 4.5 | A |
| 42104500 | Cashews, honey roasted                                                                       | 4000_LegNut | 65 | 67 | -2  | 3 | 1.5 | D |
| 41304030 | Peas, dry, cooked with pork                                                                  | 4000_LegNut | 65 | 61 | 4   | 2 | 4.5 | A |
| 41811900 | Soyburger, meatless, no bun                                                                  | 4000_LegNut | 64 | 73 | -9  | 4 | 4   | A |
| 41811910 | Vegetable burger or patty, meatless, no bun                                                  | 4000_LegNut | 64 | 73 | -9  | 4 | 4   | A |
| 41201020 | Baked beans, vegetarian                                                                      | 4000_LegNut | 63 | 63 | 0   | 3 | 4   | A |
| 41310220 | Fried chickpeas with bacon, Puerto Rican style                                               | 4000_LegNut | 63 | 60 | 3   | 2 | 4.5 | C |
| 41205030 | Refried beans with meat                                                                      | 4000_LegNut | 62 | 58 | 4   | 3 | 4.5 | A |
| 41310200 | Chickpeas stewed with pig's feet, Puerto Rican style                                         | 4000_LegNut | 62 | 56 | 6   | 1 | 4   | A |
| 41810610 | Chicken, meatless, breaded, fried                                                            | 4000_LegNut | 61 | 70 | -9  | 4 | 4.5 | A |
| 41811400 | Frankfurter or hot dog, meatless                                                             | 4000_LegNut | 60 | 69 | -9  | 4 | 4   | A |
| 41810400 | Breakfast link, pattie, or slice, meatless                                                   | 4000_LegNut | 59 | 71 | -12 | 4 | 2   | D |
| 41201050 | Baked beans from fast food / restaurant                                                      | 4000_LegNut | 59 | 62 | -3  | 4 | 4   | C |
| 41310210 | Stewed chickpeas with Spanish sausages, Puerto Rican style                                   | 4000_LegNut | 59 | 56 | 3   | 2 | 3.5 | B |
| 41210180 | Stewed white beans with pig's feet, Puerto Rican style                                       | 4000_LegNut | 59 | 52 | 7   | 1 | 4   | B |
| 41811890 | Vegetarian burger or patty, meatless, no bun                                                 | 4000_LegNut | 58 | 63 | -5  | 4 | 4   | B |
| 41210160 | Stewed pink beans with pig's feet, Puerto Rican style                                        | 4000_LegNut | 58 | 51 | 7   | 1 | 4   | B |
| 41210170 | Stewed red beans with pig's feet, Puerto Rican style                                         | 4000_LegNut | 58 | 51 | 7   | 1 | 4   | B |
| 41303550 | Stewed green peas with pig's feet and potatoes, Puerto Rican style                           | 4000_LegNut | 58 | 50 | 8   | 1 | 4   | A |
| 41420050 | Soybean curd cheese                                                                          | 4000_LegNut | 57 | 68 | -11 | 4 | 4   | A |
| 41811800 | Meatball, meatless                                                                           | 4000_LegNut | 56 | 65 | -9  | 4 | 4   | A |
| 42203000 | Peanut butter and jelly                                                                      | 4000_LegNut | 56 | 58 | -2  | 3 | 2   | D |
| 41210190 | Stewed red beans with pig's feet and potatoes, Puerto Rican style                            | 4000_LegNut | 56 | 49 | 7   | 1 | 4   | A |
| 41811600 | Luncheon slice, meatless-beef, chicken, salami or turkey                                     | 4000_LegNut | 55 | 65 | -10 | 4 | 3.5 | D |
| 41210090 | Stewed beans with pork, tomatoes, and chili peppers, Mexican style                           | 4000_LegNut | 54 | 48 | 6   | 1 | 3.5 | C |
| 42106000 | Coconut, fresh                                                                               | 4000_LegNut | 53 | 47 | 6   | 1 | 2   | C |
| 41210120 | Stewed white beans, Puerto Rican style                                                       | 4000_LegNut | 53 | 46 | 7   | 1 | 3   | C |

|          |                                                                                                  |             |    |    |     |   |     |   |
|----------|--------------------------------------------------------------------------------------------------|-------------|----|----|-----|---|-----|---|
| 41810600 | Chicken, meatless, NFS                                                                           | 4000_LegNut | 49 | 55 | -6  | 4 | 4   | C |
| 41810200 | Bacon strip, meatless                                                                            | 4000_LegNut | 47 | 57 | -10 | 4 | 1   | E |
| 42203100 | Peanut butter and chocolate spread                                                               | 4000_LegNut | 46 | 49 | -3  | 3 | 1   | D |
| 41420380 | Yogurt, soy                                                                                      | 4000_LegNut | 39 | 46 | -7  | 4 | 3.5 | A |
| 41425010 | Vermicelli, made from soybeans                                                                   | 4000_LegNut | 39 | 42 | -3  | 4 | 3.5 | B |
| 41421020 | Soybean curd, breaded, fried                                                                     | 4000_LegNut | 38 | 40 | -2  | 3 | 3.5 | B |
| 41901020 | Soyburger, meatless, with cheese on bun                                                          | 4000_LegNut | 36 | 39 | -3  | 4 | 3.5 | D |
| 41304000 | Wasabi peas                                                                                      | 4000_LegNut | 34 | 37 | -3  | 4 | 4   | D |
| 41204020 | Boston baked beans                                                                               | 4000_LegNut | 33 | 37 | -4  | 4 | 4   | A |
| 41208030 | Pork and beans                                                                                   | 4000_LegNut | 33 | 37 | -4  | 4 | 4   | A |
| 41201010 | Baked beans                                                                                      | 4000_LegNut | 33 | 36 | -3  | 4 | 4   | B |
| 41202020 | Chili beans, barbecue beans, ranch style beans or Mexican- style beans                           | 4000_LegNut | 32 | 35 | -3  | 4 | 4   | A |
| 43105200 | Psyllium seed, husks                                                                             | 4000_LegNut | 32 | 24 | 8   | 4 | 5   | B |
| 42106020 | Coconut, packaged                                                                                | 4000_LegNut | 26 | 22 | 4   | 3 | 0.5 | E |
| 41206030 | Beans and franks                                                                                 | 4000_LegNut | 17 | 15 | 2   | 4 | 3.5 | C |
| 41480020 | Frozen dessert, non-dairy                                                                        | 4000_LegNut | 1  | 6  | -5  | 4 | 2   | D |
| 25110420 | Chicken liver, braised                                                                           | 5000_MPE    | 81 | 74 | 7   | 1 | 4   | C |
| 32105020 | Egg omelet or scrambled egg, with fish                                                           | 5000_MPE    | 77 | 65 | 12  | 2 | 3.5 | C |
| 32105130 | Egg omelet or scrambled egg, Spanish omelet, made with onions, peppers, tomatoes, and mushrooms  | 5000_MPE    | 76 | 68 | 8   | 2 | 4   | B |
| 25120000 | Heart, cooked                                                                                    | 5000_MPE    | 75 | 66 | 9   | 1 | 4   | C |
| 25110120 | Beef liver, braised                                                                              | 5000_MPE    | 74 | 66 | 8   | 1 | 4   | C |
| 32130440 | Egg omelet or scrambled egg, with dark-green vegetables, no added fat                            | 5000_MPE    | 74 | 63 | 11  | 1 | 3.5 | B |
| 32130470 | Egg omelet or scrambled egg, with tomatoes and dark-green vegetables, no fat added               | 5000_MPE    | 74 | 62 | 12  | 1 | 3.5 | B |
| 23333100 | Squirrel, cooked                                                                                 | 5000_MPE    | 74 | 58 | 16  | 1 | 4.5 | C |
| 24402100 | Dove, cooked, NS as to cooking method                                                            | 5000_MPE    | 73 | 66 | 7   | 1 | 4   | A |
| 25130000 | Kidney, cooked                                                                                   | 5000_MPE    | 73 | 64 | 9   | 1 | 4   | C |
| 32105040 | Egg omelet or scrambled egg, with dark-green vegetables                                          | 5000_MPE    | 73 | 64 | 9   | 2 | 3.5 | C |
| 31101010 | Egg, whole, raw                                                                                  | 5000_MPE    | 73 | 61 | 12  | 1 | 4   | A |
| 31103010 | Egg, whole, boiled or poached                                                                    | 5000_MPE    | 72 | 60 | 12  | 1 | 4   | A |
| 32130500 | Egg omelet or scrambled egg, with vegetables other than dark green and/or tomatoes, no added fat | 5000_MPE    | 72 | 59 | 13  | 1 | 3.5 | B |
| 33401220 | Egg substitute, omelet, scrambled, or fried, with vegetables, NS as to fat added in cooking      | 5000_MPE    | 71 | 75 | -4  | 3 | 3.5 | C |
| 25110450 | Chicken liver, fried                                                                             | 5000_MPE    | 71 | 63 | 8   | 1 | 3.5 | C |
| 31110010 | Egg, yolk only, raw                                                                              | 5000_MPE    | 71 | 59 | 12  | 1 | 2   | D |
| 32105013 | Egg omelet or scrambled egg, with seafood                                                        | 5000_MPE    | 71 | 57 | 14  | 2 | 3.5 | C |
| 32130430 | Egg omelet or scrambled egg, with dark-green vegetables, fat added                               | 5000_MPE    | 70 | 61 | 9   | 1 | 3.5 | C |
| 32130450 | Egg omelet or scrambled egg, with dark-green vegetables, NS as to fat                            | 5000_MPE    | 70 | 61 | 9   | 1 | 3.5 | C |

|          |                                                                                        |          |    |    |    |   |     |   |
|----------|----------------------------------------------------------------------------------------|----------|----|----|----|---|-----|---|
| 25110140 | Beef liver, fried                                                                      | 5000_MPE | 70 | 60 | 10 | 1 | 4   | C |
| 25150000 | Brains, cooked                                                                         | 5000_MPE | 70 | 54 | 16 | 1 | 3.5 | C |
| 32400320 | Egg white, omelet, scrambled, or fried, with vegetables, NS as to fat added in cooking | 5000_MPE | 69 | 71 | -2 | 2 | 3.5 | B |
| 24198720 | Chicken, ground                                                                        | 5000_MPE | 69 | 61 | 8  | 1 | 4   | B |
| 24207000 | Turkey, ground                                                                         | 5000_MPE | 69 | 61 | 8  | 1 | 4   | B |
| 31102000 | Egg, whole, cooked, NS as to cooking method                                            | 5000_MPE | 69 | 59 | 10 | 1 | 3.5 | C |
| 32130640 | Egg omelet or scrambled egg, with cheese and dark-green vegetables, no added fat       | 5000_MPE | 69 | 59 | 10 | 2 | 3.5 | C |
| 32130410 | Egg omelet or scrambled egg, with tomatoes, no added fat                               | 5000_MPE | 69 | 56 | 13 | 1 | 3.5 | B |
| 32131210 | Egg omelet or scrambled egg, with potatoes and/or onions, no added fat                 | 5000_MPE | 69 | 56 | 13 | 1 | 3.5 | B |
| 24403100 | Quail, cooked                                                                          | 5000_MPE | 68 | 63 | 5  | 1 | 4   | A |
| 24123301 | Chicken breast, grilled without sauce, skin not eaten                                  | 5000_MPE | 68 | 61 | 7  | 1 | 4   | A |
| 24124201 | Chicken breast, sauteed, skin not eaten                                                | 5000_MPE | 68 | 61 | 7  | 1 | 4   | A |
| 24127501 | Chicken breast, baked, coated, skin / coating not eaten                                | 5000_MPE | 68 | 61 | 7  | 1 | 4   | A |
| 24122161 | Chicken breast, baked, broiled, or roasted with marinade, skin not eaten, from raw     | 5000_MPE | 68 | 60 | 8  | 1 | 4   | A |
| 24202500 | Turkey, thigh, cooked, skin not eaten                                                  | 5000_MPE | 68 | 59 | 9  | 1 | 4   | B |
| 32105048 | Egg omelet or scrambled egg, with mushrooms                                            | 5000_MPE | 68 | 59 | 9  | 1 | 3.5 | B |
| 32130010 | Egg omelet or scrambled egg, made with oil                                             | 5000_MPE | 68 | 59 | 9  | 1 | 3.5 | C |
| 32130080 | Egg omelet or scrambled egg, from fast food / restaurant                               | 5000_MPE | 68 | 59 | 9  | 1 | 3.5 | C |
| 24201220 | Turkey, dark meat, roasted, skin not eaten                                             | 5000_MPE | 68 | 58 | 10 | 1 | 4   | B |
| 32105170 | Egg omelet or scrambled egg, with chicken or turkey                                    | 5000_MPE | 68 | 58 | 10 | 1 | 4   | A |
| 32130460 | Egg omelet or scrambled egg, with tomatoes and dark-green vegetables, fat added        | 5000_MPE | 68 | 58 | 10 | 1 | 3.5 | C |
| 32130480 | Egg omelet or scrambled egg, with tomatoes and dark-green vegetables, NS as to fat     | 5000_MPE | 68 | 58 | 10 | 1 | 3.5 | C |
| 32130060 | Egg omelet or scrambled egg, made with cooking spray                                   | 5000_MPE | 68 | 56 | 12 | 1 | 3.5 | B |
| 31106010 | Egg, whole, baked, no added fat                                                        | 5000_MPE | 68 | 54 | 14 | 1 | 3.5 | B |
| 32130070 | Egg omelet or scrambled egg, no added fat                                              | 5000_MPE | 68 | 54 | 14 | 1 | 3.5 | B |
| 33401210 | Egg substitute, omelet, scrambled, or fried, with vegetables, fat not added in cooking | 5000_MPE | 67 | 66 | 1  | 3 | 4   | A |
| 23332100 | Opossum, cooked                                                                        | 5000_MPE | 67 | 59 | 8  | 1 | 4.5 | C |
| 23350100 | Ostrich, cooked                                                                        | 5000_MPE | 67 | 59 | 8  | 1 | 4   | B |
| 24103050 | Chicken, NS as to part, grilled without sauce, NS as to skin eaten                     | 5000_MPE | 67 | 59 | 8  | 1 | 4   | A |
| 24103060 | Chicken, NS as to part, grilled without sauce, skin not eaten                          | 5000_MPE | 67 | 59 | 8  | 1 | 4   | A |
| 24104051 | Chicken, NS as to part, sauteed, skin not eaten                                        | 5000_MPE | 67 | 59 | 8  | 1 | 4   | A |
| 32110150 | Shrimp-egg patty                                                                       | 5000_MPE | 67 | 59 | 8  | 2 | 1   | E |
| 24201320 | Turkey, light and dark meat, roasted, skin not eaten                                   | 5000_MPE | 67 | 58 | 9  | 1 | 4   | A |
| 24202010 | Turkey, drumstick, cooked, skin not eaten                                              | 5000_MPE | 67 | 58 | 9  | 1 | 4   | A |
| 24202060 | Turkey, drumstick, roasted, skin not eaten                                             | 5000_MPE | 67 | 58 | 9  | 1 | 4   | A |
| 32104950 | Egg omelet or scrambled egg, fat not added in cooking                                  | 5000_MPE | 67 | 54 | 13 | 1 | 3.5 | C |

|          |                                                                                                  |          |    |    |    |   |     |   |
|----------|--------------------------------------------------------------------------------------------------|----------|----|----|----|---|-----|---|
| 23150270 | Goat head, cooked                                                                                | 5000_MPE | 67 | 49 | 18 | 1 | 4   | C |
| 33401200 | Egg substitute, omelet, scrambled, or fried, with vegetables                                     | 5000_MPE | 66 | 70 | -4 | 3 | 3.5 | B |
| 24201310 | Turkey, light and dark meat, roasted, NS as to skin eaten                                        | 5000_MPE | 66 | 58 | 8  | 1 | 4   | B |
| 24201330 | Turkey, light and dark meat, roasted, skin eaten                                                 | 5000_MPE | 66 | 58 | 8  | 1 | 4   | B |
| 32130630 | Egg omelet or scrambled egg, with cheese and dark-green vegetables, fat added                    | 5000_MPE | 66 | 58 | 8  | 2 | 3   | D |
| 32130650 | Egg omelet or scrambled egg, with cheese and dark-green vegetables, NS as to fat                 | 5000_MPE | 66 | 58 | 8  | 2 | 3   | D |
| 24142501 | Chicken drumstick, grilled without sauce, skin not eaten                                         | 5000_MPE | 66 | 57 | 9  | 1 | 4   | B |
| 24201000 | Turkey, NFS                                                                                      | 5000_MPE | 66 | 57 | 9  | 1 | 4   | A |
| 24201010 | Turkey, light meat, cooked, NS as to skin eaten                                                  | 5000_MPE | 66 | 57 | 9  | 1 | 4   | A |
| 24201020 | Turkey, light meat, skin not eaten                                                               | 5000_MPE | 66 | 57 | 9  | 1 | 4   | A |
| 24201120 | Turkey, light meat, roasted, skin not eaten                                                      | 5000_MPE | 66 | 57 | 9  | 1 | 4   | A |
| 24201410 | Turkey, light or dark meat, stewed, skin not eaten                                               | 5000_MPE | 66 | 57 | 9  | 1 | 4   | B |
| 24203010 | Turkey, wing, cooked, skin not eaten                                                             | 5000_MPE | 66 | 57 | 9  | 1 | 4   | A |
| 24144301 | Chicken drumstick, sauteed, skin not eaten                                                       | 5000_MPE | 66 | 56 | 10 | 1 | 4   | B |
| 24147401 | Chicken drumstick, baked, coated, skin / coating not eaten                                       | 5000_MPE | 66 | 56 | 10 | 1 | 4   | B |
| 32130490 | Egg omelet or scrambled egg, with vegetables other than dark green and/or tomatoes, fat added    | 5000_MPE | 66 | 56 | 10 | 1 | 3.5 | C |
| 32130510 | Egg omelet or scrambled egg, with vegetables other than dark green and/or tomatoes, NS as to fat | 5000_MPE | 66 | 56 | 10 | 1 | 3.5 | C |
| 32130670 | Egg omelet or scrambled egg, with cheese, tomatoes, and dark-green vegetables, no added fat      | 5000_MPE | 66 | 56 | 10 | 2 | 3.5 | C |
| 24400020 | Cornish game hen, cooked, skin not eaten                                                         | 5000_MPE | 66 | 54 | 12 | 1 | 4   | A |
| 24401020 | Cornish game hen, roasted, skin not eaten                                                        | 5000_MPE | 66 | 54 | 12 | 1 | 4   | A |
| 31104000 | Egg, whole, poached                                                                              | 5000_MPE | 66 | 53 | 13 | 1 | 3.5 | B |
| 33001100 | Egg substitute, cheese flavored, omelet, scrambled, or fried, fat added in cooking               | 5000_MPE | 65 | 68 | -3 | 3 | 3.5 | C |
| 33001120 | Egg substitute, cheese flavored, omelet, scrambled, or fried, NS as to fat added in cooking      | 5000_MPE | 65 | 68 | -3 | 3 | 3.5 | C |
| 33001200 | Egg substitute, vegetable flavored, omelet, scrambled, or fried, fat added in cooking            | 5000_MPE | 65 | 68 | -3 | 3 | 3.5 | C |
| 33001220 | Egg substitute, vegetable flavored, omelet, scrambled, or fried, NS as to fat added in cooking   | 5000_MPE | 65 | 68 | -3 | 3 | 3.5 | C |
| 32400010 | Egg white omelet or scrambled egg, NS as to fat added in cooking                                 | 5000_MPE | 65 | 65 | 0  | 2 | 4   | A |
| 32400012 | Egg white omelet or scrambled egg, fat added in cooking                                          | 5000_MPE | 65 | 65 | 0  | 2 | 4   | A |
| 31201000 | Duck egg, cooked                                                                                 | 5000_MPE | 65 | 59 | 6  | 1 | 3.5 | C |
| 32400310 | Egg white, omelet, scrambled, or fried, with vegetables, fat not added in cooking                | 5000_MPE | 65 | 58 | 7  | 1 | 4   | A |
| 24201030 | Turkey, light meat, skin eaten                                                                   | 5000_MPE | 65 | 57 | 8  | 1 | 4   | B |
| 24201110 | Turkey, light meat, roasted, NS as to skin eaten                                                 | 5000_MPE | 65 | 57 | 8  | 1 | 4   | B |
| 24201130 | Turkey, light meat, roasted, skin eaten                                                          | 5000_MPE | 65 | 57 | 8  | 1 | 4   | B |
| 24202460 | Turkey, thigh, cooked, skin eaten                                                                | 5000_MPE | 65 | 57 | 8  | 1 | 4   | B |
| 24402110 | Dove, fried                                                                                      | 5000_MPE | 65 | 57 | 8  | 1 | 4   | A |

|          |                                                                                                                |          |    |    |    |   |     |   |
|----------|----------------------------------------------------------------------------------------------------------------|----------|----|----|----|---|-----|---|
| 24201210 | Turkey, dark meat, roasted, NS as to skin eaten                                                                | 5000_MPE | 65 | 55 | 10 | 1 | 4   | B |
| 24201230 | Turkey, dark meat, roasted, skin eaten                                                                         | 5000_MPE | 65 | 55 | 10 | 1 | 4   | B |
| 32105100 | Egg omelet or scrambled egg, with potatoes and/or onions (Tortilla Espanola, traditional style Spanish omelet) | 5000_MPE | 65 | 55 | 10 | 1 | 3.5 | C |
| 32130000 | Egg omelet or scrambled egg, made with margarine                                                               | 5000_MPE | 65 | 55 | 10 | 2 | 3.5 | C |
| 24142301 | Chicken drumstick, baked, broiled, or roasted, skin not eaten, from raw                                        | 5000_MPE | 65 | 54 | 11 | 1 | 4   | A |
| 32130400 | Egg omelet or scrambled egg, with tomatoes, fat added                                                          | 5000_MPE | 65 | 54 | 11 | 1 | 3.5 | C |
| 32130420 | Egg omelet or scrambled egg, with tomatoes, NS as to fat                                                       | 5000_MPE | 65 | 54 | 11 | 1 | 3.5 | C |
| 32130610 | Egg omelet or scrambled egg, with cheese and tomatoes, no added fat                                            | 5000_MPE | 65 | 54 | 11 | 2 | 3.5 | C |
| 32130700 | Egg omelet or scrambled egg, with cheese and vegetables other than dark green and/or tomatoes, no added fat    | 5000_MPE | 65 | 54 | 11 | 2 | 3.5 | C |
| 31111010 | Egg, yolk only, cooked, no added fat                                                                           | 5000_MPE | 65 | 52 | 13 | 1 | 2   | D |
| 33401420 | Egg substitute, omelet, scrambled, or fried, with cheese and vegetables, NS as to fat added in cooking         | 5000_MPE | 64 | 67 | -3 | 3 | 3.5 | C |
| 31202000 | Goose egg, cooked                                                                                              | 5000_MPE | 64 | 60 | 4  | 1 | 3.5 | C |
| 24198683 | Chicken fillet, grilled                                                                                        | 5000_MPE | 64 | 58 | 6  | 1 | 4   | A |
| 24124200 | Chicken breast, sauteed, skin eaten                                                                            | 5000_MPE | 64 | 57 | 7  | 1 | 4   | B |
| 24123300 | Chicken breast, grilled without sauce, skin eaten                                                              | 5000_MPE | 64 | 56 | 8  | 1 | 4   | B |
| 32105045 | Egg omelet or scrambled egg, with cheese and dark-green vegetables                                             | 5000_MPE | 64 | 56 | 8  | 2 | 3   | C |
| 32130110 | Egg omelet or scrambled egg, with cheese, made with oil                                                        | 5000_MPE | 64 | 56 | 8  | 2 | 3   | D |
| 24134101 | Chicken leg, drumstick and thigh, grilled without sauce, skin not eaten                                        | 5000_MPE | 64 | 55 | 9  | 1 | 4   | B |
| 24134301 | Chicken leg, drumstick and thigh, sauteed, skin not eaten                                                      | 5000_MPE | 64 | 55 | 9  | 1 | 4   | B |
| 24137311 | Chicken leg, drumstick and thigh, baked, coated, skin / coating not eaten                                      | 5000_MPE | 64 | 55 | 9  | 1 | 4   | B |
| 32105180 | Huevos rancheros                                                                                               | 5000_MPE | 64 | 55 | 9  | 2 | 3.5 | C |
| 32130660 | Egg omelet or scrambled egg, with cheese, tomatoes, and dark-green vegetables, fat added                       | 5000_MPE | 64 | 55 | 9  | 2 | 3   | D |
| 32130680 | Egg omelet or scrambled egg, with cheese, tomatoes, and dark-green vegetables, NS as to fat                    | 5000_MPE | 64 | 55 | 9  | 2 | 3   | D |
| 24102000 | Chicken, NS as to part, baked, broiled, or roasted, NS as to skin eaten                                        | 5000_MPE | 64 | 54 | 10 | 1 | 4   | A |
| 24102020 | Chicken, NS as to part, baked, broiled, or roasted, skin not eaten                                             | 5000_MPE | 64 | 54 | 10 | 1 | 4   | A |
| 24132231 | Chicken leg, drumstick and thigh, baked or broiled, skin not eaten                                             | 5000_MPE | 64 | 54 | 10 | 1 | 4   | A |
| 24140200 | Chicken, drumstick, NS as to cooking method, NS as to skin eaten                                               | 5000_MPE | 64 | 54 | 10 | 1 | 4   | A |
| 24142200 | Chicken, drumstick, roasted, broiled, or baked, NS as to skin eaten                                            | 5000_MPE | 64 | 54 | 10 | 1 | 4   | A |
| 24142220 | Chicken, drumstick, roasted, broiled, or baked, skin not eaten                                                 | 5000_MPE | 64 | 54 | 10 | 1 | 4   | A |
| 32131200 | Egg omelet or scrambled egg, with potatoes and/or onions, fat added                                            | 5000_MPE | 64 | 54 | 10 | 1 | 3.5 | C |
| 32131220 | Egg omelet or scrambled egg, with potatoes and/or onions, NS as to fat                                         | 5000_MPE | 64 | 54 | 10 | 1 | 3.5 | C |
| 24103000 | Chicken, NS as to part, stewed, NS as to skin eaten                                                            | 5000_MPE | 64 | 53 | 11 | 1 | 4   | A |
| 24103020 | Chicken, NS as to part, stewed, skin not eaten                                                                 | 5000_MPE | 64 | 53 | 11 | 1 | 4   | A |



|          |                                                                                                             |          |    |    |    |   |     |   |
|----------|-------------------------------------------------------------------------------------------------------------|----------|----|----|----|---|-----|---|
| 24123120 | Chicken breast, stewed, skin not eaten                                                                      | 5000_MPE | 64 | 53 | 11 | 1 | 4.5 | A |
| 24152231 | Chicken thigh, baked, broiled, or roasted, skin not eaten, from raw                                         | 5000_MPE | 64 | 53 | 11 | 1 | 4   | B |
| 32104900 | Egg omelet or scrambled egg, NS as to fat added in cooking                                                  | 5000_MPE | 64 | 53 | 11 | 2 | 3.5 | C |
| 24160120 | Chicken, wing, NS as to cooking method, skin not eaten                                                      | 5000_MPE | 64 | 51 | 13 | 1 | 4   | B |
| 24162120 | Chicken, wing, roasted, broiled, or baked, skin not eaten                                                   | 5000_MPE | 64 | 51 | 13 | 1 | 4   | B |
| 32110100 | Eggs a la Malaguena, Puerto Rican style                                                                     | 5000_MPE | 64 | 51 | 13 | 2 | 3.5 | C |
| 32400065 | Egg white omelet, scrambled, or fried, made with oil                                                        | 5000_MPE | 63 | 63 | 0  | 2 | 4   | A |
| 32105310 | Ripe plantain omelet, Puerto Rican style                                                                    | 5000_MPE | 63 | 56 | 7  | 1 | 3   | D |
| 24127201 | Chicken breast, fried, coated, skin / coating not eaten, from raw                                           | 5000_MPE | 63 | 55 | 8  | 1 | 4   | A |
| 24154011 | Chicken thigh, grilled without sauce, skin not eaten                                                        | 5000_MPE | 63 | 55 | 8  | 1 | 4   | B |
| 24154301 | Chicken thigh, sauteed, skin not eaten                                                                      | 5000_MPE | 63 | 54 | 9  | 1 | 4   | B |
| 24157401 | Chicken thigh, baked, coated, skin / coating not eaten                                                      | 5000_MPE | 63 | 54 | 9  | 1 | 4   | B |
| 24201360 | Turkey, light or dark meat, fried, coated, skin not eaten                                                   | 5000_MPE | 63 | 54 | 9  | 1 | 4   | A |
| 24122130 | Chicken breast, baked, broiled, or roasted, skin eaten, from raw                                            | 5000_MPE | 63 | 53 | 10 | 1 | 4   | B |
| 24122131 | Chicken breast, baked, broiled, or roasted, skin not eaten, from raw                                        | 5000_MPE | 63 | 53 | 10 | 1 | 4.5 | A |
| 24122171 | Chicken breast, rotisserie, skin not eaten                                                                  | 5000_MPE | 63 | 53 | 10 | 1 | 4.5 | A |
| 31105030 | Egg, whole, fried with oil                                                                                  | 5000_MPE | 63 | 53 | 10 | 1 | 3.5 | C |
| 31105090 | Egg, whole, fried, from fast food / restaurant                                                              | 5000_MPE | 63 | 53 | 10 | 1 | 3.5 | C |
| 31106000 | Egg, whole, baked, NS as to fat                                                                             | 5000_MPE | 63 | 53 | 10 | 1 | 3.5 | C |
| 31106020 | Egg, whole, baked, fat added                                                                                | 5000_MPE | 63 | 53 | 10 | 1 | 3.5 | C |
| 32129990 | Egg omelet or scrambled egg, NS as to fat                                                                   | 5000_MPE | 63 | 53 | 10 | 1 | 3.5 | C |
| 32130065 | Egg omelet or scrambled egg, NS as to fat type                                                              | 5000_MPE | 63 | 53 | 10 | 1 | 3.5 | C |
| 32130690 | Egg omelet or scrambled egg, with cheese and vegetables other than dark green and/or tomatoes, fat added    | 5000_MPE | 63 | 53 | 10 | 2 | 3   | D |
| 32130710 | Egg omelet or scrambled egg, with cheese and vegetables other than dark green and/or tomatoes, NS as to fat | 5000_MPE | 63 | 53 | 10 | 2 | 3   | D |
| 24130200 | Chicken, leg (drumstick and thigh), NS as to cooking method, NS as to skin eaten                            | 5000_MPE | 63 | 52 | 11 | 1 | 4   | B |
| 24132200 | Chicken, leg (drumstick and thigh), roasted, broiled, or baked, NS as to skin eaten                         | 5000_MPE | 63 | 52 | 11 | 1 | 4   | B |
| 24132220 | Chicken, leg (drumstick and thigh), roasted, broiled, or baked, skin not eaten                              | 5000_MPE | 63 | 52 | 11 | 1 | 4   | B |
| 24140220 | Chicken drumstick, NS as to cooking method, skin not eaten                                                  | 5000_MPE | 63 | 52 | 11 | 1 | 4   | B |
| 24142401 | Chicken drumstick, rotisserie, skin not eaten                                                               | 5000_MPE | 63 | 52 | 11 | 1 | 4   | B |
| 24202000 | Turkey, drumstick, cooked, NS as to skin eaten                                                              | 5000_MPE | 63 | 52 | 11 | 1 | 4   | C |
| 24202050 | Turkey, drumstick, roasted, NS as to skin eaten                                                             | 5000_MPE | 63 | 52 | 11 | 1 | 4   | C |
| 24202070 | Turkey, drumstick, roasted, skin eaten                                                                      | 5000_MPE | 63 | 52 | 11 | 1 | 4   | C |
| 24202600 | Turkey, neck                                                                                                | 5000_MPE | 63 | 52 | 11 | 1 | 3.5 | D |
| 32130160 | Egg omelet or scrambled egg, with cheese, made with cooking spray                                           | 5000_MPE | 63 | 52 | 11 | 2 | 3.5 | C |
| 32130170 | Egg omelet or scrambled egg, with cheese, no added fat                                                      | 5000_MPE | 63 | 52 | 11 | 2 | 3   | C |
| 24164120 | Chicken, wing, fried, no coating, skin not eaten, NS as to type of fat added in cooking                     | 5000_MPE | 63 | 51 | 12 | 1 | 4   | B |

|          |                                                                                                                            |          |    |    |    |   |     |   |
|----------|----------------------------------------------------------------------------------------------------------------------------|----------|----|----|----|---|-----|---|
| 24164123 | Chicken, wing, fried, no coating, skin not eaten, made with oil                                                            | 5000_MPE | 63 | 51 | 12 | 1 | 4   | B |
| 24167120 | Chicken, wing, coated, baked or fried, prepared with skin, skin/coating not eaten, NS as to type of fat added in cooking   | 5000_MPE | 63 | 51 | 12 | 1 | 4   | B |
| 24167123 | Chicken, wing, coated, baked or fried, prepared with skin, skin/coating not eaten, made with oil                           | 5000_MPE | 63 | 51 | 12 | 1 | 4   | B |
| 31103000 | Egg, whole, boiled                                                                                                         | 5000_MPE | 63 | 51 | 12 | 1 | 3.5 | B |
| 31111000 | Egg, yolk only, cooked, NS as to fat                                                                                       | 5000_MPE | 63 | 51 | 12 | 1 | 2   | D |
| 31111020 | Egg, yolk only, cooked, fat added                                                                                          | 5000_MPE | 63 | 51 | 12 | 1 | 2   | D |
| 32130840 | Egg omelet or scrambled egg, with meat and dark-green vegetables, no added fat                                             | 5000_MPE | 63 | 50 | 13 | 1 | 3.5 | B |
| 24104000 | Chicken, NS as to part, fried, no coating, NS as to skin eaten, fat added in cooking                                       | 5000_MPE | 62 | 54 | 8  | 1 | 4   | B |
| 24104020 | Chicken, NS as to part, fried, no coating, skin not eaten, fat added in cooking                                            | 5000_MPE | 62 | 54 | 8  | 1 | 4   | B |
| 24107020 | Chicken, NS as to part, coated, baked or fried, prepared with skin, skin/coating not eaten, fat added in cooking           | 5000_MPE | 62 | 54 | 8  | 1 | 4   | B |
| 24107060 | Chicken, NS as to part, coated, baked or fried, prepared skinless, coating not eaten, fat added in cooking                 | 5000_MPE | 62 | 54 | 8  | 1 | 4   | B |
| 24122160 | Chicken breast, baked, broiled, or roasted with marinade, skin eaten, from raw                                             | 5000_MPE | 62 | 54 | 8  | 1 | 4   | B |
| 24124100 | Chicken, breast, fried, no coating, NS as to skin eaten, fat added in cooking                                              | 5000_MPE | 62 | 54 | 8  | 1 | 4   | B |
| 24124120 | Chicken, breast, fried, no coating, skin not eaten, NS as to type of fat added in cooking                                  | 5000_MPE | 62 | 54 | 8  | 1 | 4   | B |
| 24124123 | Chicken, breast, fried, no coating, skin not eaten, made with oil                                                          | 5000_MPE | 62 | 54 | 8  | 1 | 4   | B |
| 24127120 | Chicken, breast, coated, baked or fried, prepared with skin, skin/coating not eaten, NS as to type of fat added in cooking | 5000_MPE | 62 | 54 | 8  | 1 | 4   | B |
| 24127160 | Chicken, breast, coated, baked or fried, prepared skinless, coating not eaten, NS as to type of fat added in cooking       | 5000_MPE | 62 | 54 | 8  | 1 | 4   | B |
| 24127163 | Chicken, breast, coated, baked or fried, prepared skinless, coating not eaten, made with oil                               | 5000_MPE | 62 | 54 | 8  | 1 | 4   | B |
| 32102000 | Egg, deviled                                                                                                               | 5000_MPE | 62 | 54 | 8  | 2 | 3   | C |
| 24203020 | Turkey, wing, cooked, skin eaten                                                                                           | 5000_MPE | 62 | 53 | 9  | 1 | 4   | B |
| 32130620 | Egg omelet or scrambled egg, with cheese and tomatoes, NS as to fat                                                        | 5000_MPE | 62 | 53 | 9  | 2 | 3   | D |
| 24102050 | Chicken, NS as to part, rotisserie, NS as to skin eaten                                                                    | 5000_MPE | 62 | 52 | 10 | 1 | 4   | A |
| 24102070 | Chicken, NS as to part, rotisserie, skin not eaten                                                                         | 5000_MPE | 62 | 52 | 10 | 1 | 4   | A |
| 24120120 | Chicken breast, NS as to cooking method, skin not eaten                                                                    | 5000_MPE | 62 | 52 | 10 | 1 | 4.5 | A |
| 24123110 | Chicken breast, stewed, skin eaten                                                                                         | 5000_MPE | 62 | 52 | 10 | 1 | 4   | A |
| 24147301 | Chicken drumstick, fried, coated, skin / coating not eaten, from raw                                                       | 5000_MPE | 62 | 52 | 10 | 1 | 4   | A |
| 24150200 | Chicken, thigh, NS as to cooking method, NS as to skin eaten                                                               | 5000_MPE | 62 | 52 | 10 | 1 | 4   | B |
| 24152200 | Chicken, thigh, roasted, broiled, or baked, NS as to skin eaten                                                            | 5000_MPE | 62 | 52 | 10 | 1 | 4   | B |
| 24152220 | Chicken, thigh, roasted, broiled, or baked, skin not eaten                                                                 | 5000_MPE | 62 | 52 | 10 | 1 | 4   | B |
| 32130100 | Egg omelet or scrambled egg, with cheese, made with margarine                                                              | 5000_MPE | 62 | 52 | 10 | 2 | 3   | D |
| 32130600 | Egg omelet or scrambled egg, with cheese and tomatoes, fat added                                                           | 5000_MPE | 62 | 52 | 10 | 2 | 3   | D |
| 89901006 | Chicken, for use with vegetables                                                                                           | 5000_MPE | 62 | 52 | 10 | 1 | 4   | A |
| 24100000 | Chicken, NS as to part and cooking method, NS as to skin eaten                                                             | 5000_MPE | 62 | 51 | 11 | 1 | 4   | A |

|          |                                                                                                                           |          |    |    |    |   |     |   |
|----------|---------------------------------------------------------------------------------------------------------------------------|----------|----|----|----|---|-----|---|
| 24100020 | Chicken, NS as to part and cooking method, skin not eaten                                                                 | 5000_MPE | 62 | 51 | 11 | 1 | 4   | A |
| 24120100 | Chicken, breast, NS as to cooking method, NS as to skin eaten                                                             | 5000_MPE | 62 | 51 | 11 | 1 | 4   | B |
| 24122100 | Chicken, breast, roasted, broiled, or baked, NS as to skin eaten                                                          | 5000_MPE | 62 | 51 | 11 | 1 | 4   | B |
| 24122110 | Chicken, breast, roasted, broiled, or baked, skin eaten                                                                   | 5000_MPE | 62 | 51 | 11 | 1 | 4   | B |
| 24122120 | Chicken, breast, roasted, broiled, or baked, skin not eaten                                                               | 5000_MPE | 62 | 51 | 11 | 1 | 4   | B |
| 24143220 | Chicken drumstick, stewed, skin not eaten                                                                                 | 5000_MPE | 62 | 51 | 11 | 1 | 4   | A |
| 25170420 | Gizzard, cooked                                                                                                           | 5000_MPE | 62 | 51 | 11 | 1 | 4.5 | C |
| 32105050 | Egg omelet or scrambled egg, with vegetables other than dark-green                                                        | 5000_MPE | 62 | 51 | 11 | 2 | 3.5 | C |
| 23335100 | Raccoon, cooked                                                                                                           | 5000_MPE | 62 | 50 | 12 | 1 | 4   | C |
| 31105010 | Egg, whole, fried no added fat                                                                                            | 5000_MPE | 62 | 48 | 14 | 1 | 3.5 | B |
| 31105080 | Egg, whole, fried with cooking spray                                                                                      | 5000_MPE | 62 | 48 | 14 | 1 | 3.5 | B |
| 23324100 | Caribou, cooked                                                                                                           | 5000_MPE | 62 | 47 | 15 | 1 | 4.5 | C |
| 24127202 | Chicken breast, fried, coated, prepared skinless, coating eaten, from raw                                                 | 5000_MPE | 61 | 56 | 5  | 1 | 4   | A |
| 24201350 | Turkey, light or dark meat, battered, fried, NS as to skin eaten                                                          | 5000_MPE | 61 | 53 | 8  | 1 | 4   | A |
| 24201370 | Turkey, light or dark meat, fried, coated, skin eaten                                                                     | 5000_MPE | 61 | 53 | 8  | 1 | 4   | A |
| 32103020 | Egg salad, made with mayonnaise-type salad dressing                                                                       | 5000_MPE | 61 | 53 | 8  | 2 | 3   | C |
| 24142500 | Chicken drumstick, grilled without sauce, skin eaten                                                                      | 5000_MPE | 61 | 52 | 9  | 1 | 4   | B |
| 24154223 | Chicken, thigh, fried, no coating, skin not eaten, made with oil                                                          | 5000_MPE | 61 | 52 | 9  | 1 | 4   | B |
| 24157223 | Chicken, thigh, coated, baked or fried, prepared with skin, skin/coating not eaten, made with oil                         | 5000_MPE | 61 | 52 | 9  | 1 | 4   | B |
| 32105150 | Egg omelet or scrambled egg, with cheese, beans, tomatoes, and chili sauce                                                | 5000_MPE | 61 | 52 | 9  | 2 | 3   | C |
| 24133220 | Chicken leg, drumstick and thigh, stewed, skin not eaten                                                                  | 5000_MPE | 61 | 51 | 10 | 1 | 4   | B |
| 24154200 | Chicken, thigh, fried, no coating, NS as to skin eaten, fat added in cooking                                              | 5000_MPE | 61 | 51 | 10 | 1 | 4   | B |
| 24154220 | Chicken, thigh, fried, no coating, skin not eaten, NS as to type of fat added in cooking                                  | 5000_MPE | 61 | 51 | 10 | 1 | 4   | B |
| 24157220 | Chicken, thigh, coated, baked or fried, prepared with skin, skin/coating not eaten, NS as to type of fat added in cooking | 5000_MPE | 61 | 51 | 10 | 1 | 4   | B |
| 24157260 | Chicken, thigh, coated, baked or fried, prepared skinless, coating not eaten, NS as to type of fat added in cooking       | 5000_MPE | 61 | 51 | 10 | 1 | 4   | B |
| 24157263 | Chicken, thigh, coated, baked or fried, prepared skinless, coating not eaten, made with oil                               | 5000_MPE | 61 | 51 | 10 | 1 | 4   | B |
| 24132241 | Chicken leg, drumstick and thigh, rotisserie, skin not eaten                                                              | 5000_MPE | 61 | 50 | 11 | 1 | 4   | B |
| 24153220 | Chicken thigh, stewed, skin not eaten                                                                                     | 5000_MPE | 61 | 50 | 11 | 1 | 4   | B |
| 24202020 | Turkey, drumstick, cooked, skin eaten                                                                                     | 5000_MPE | 61 | 50 | 11 | 1 | 4   | B |
| 24202450 | Turkey, thigh, cooked, NS as to skin eaten                                                                                | 5000_MPE | 61 | 50 | 11 | 1 | 4   | B |
| 32105000 | Egg omelet or scrambled egg, fat added in cooking                                                                         | 5000_MPE | 61 | 50 | 11 | 2 | 3.5 | C |
| 32130830 | Egg omelet or scrambled egg, with meat and dark-green vegetables, fat added                                               | 5000_MPE | 61 | 50 | 11 | 2 | 3   | C |
| 32130850 | Egg omelet or scrambled egg, with meat and dark-green vegetables, NS as to fat                                            | 5000_MPE | 61 | 50 | 11 | 2 | 3   | C |
| 24143200 | Chicken, drumstick, stewed, NS as to skin eaten                                                                           | 5000_MPE | 61 | 49 | 12 | 1 | 4   | B |

|          |                                                                                                                               |          |    |    |    |   |     |   |
|----------|-------------------------------------------------------------------------------------------------------------------------------|----------|----|----|----|---|-----|---|
| 32400300 | Egg white, omelet, scrambled, or fried, with vegetables                                                                       | 5000_MPE | 60 | 58 | 2  | 2 | 3.5 | B |
| 32103000 | Egg salad, made with mayonnaise                                                                                               | 5000_MPE | 60 | 56 | 4  | 3 | 3   | D |
| 33201500 | Scrambled egg, made from cholesterol-free frozen mixture with vegetables                                                      | 5000_MPE | 60 | 56 | 4  | 2 | 4   | B |
| 24127500 | Chicken breast, baked, coated, skin / coating eaten                                                                           | 5000_MPE | 60 | 52 | 8  | 1 | 4   | A |
| 24300120 | Duck, cooked, skin not eaten                                                                                                  | 5000_MPE | 60 | 52 | 8  | 1 | 4   | A |
| 24301000 | Duck, roasted, NS as to skin eaten                                                                                            | 5000_MPE | 60 | 52 | 8  | 1 | 4   | A |
| 24301020 | Duck, roasted, skin not eaten                                                                                                 | 5000_MPE | 60 | 52 | 8  | 1 | 4   | A |
| 24404100 | Pheasant, cooked                                                                                                              | 5000_MPE | 60 | 52 | 8  | 1 | 4   | A |
| 24134200 | Chicken, leg (drumstick and thigh), fried, no coating, NS as to skin eaten, fat added in cooking                              | 5000_MPE | 60 | 51 | 9  | 1 | 4   | B |
| 24134220 | Chicken, leg (drumstick and thigh), fried, no coating, skin not eaten, fat added in cooking                                   | 5000_MPE | 60 | 51 | 9  | 1 | 4   | B |
| 24137220 | Chicken, leg (drumstick and thigh), coated, baked or fried, prepared with skin, skin/coating not eaten, fat added in cooking  | 5000_MPE | 60 | 51 | 9  | 1 | 4   | B |
| 24137260 | Chicken, leg (drumstick and thigh), coated, baked or fried, prepared skinless, coating not eaten, fat added in cooking        | 5000_MPE | 60 | 51 | 9  | 1 | 4   | B |
| 24144200 | Chicken, drumstick, fried, no coating, NS as to skin eaten, fat added in cooking                                              | 5000_MPE | 60 | 51 | 9  | 1 | 4   | B |
| 24144220 | Chicken, drumstick, fried, no coating, skin not eaten, NS as to type of fat added in cooking                                  | 5000_MPE | 60 | 51 | 9  | 1 | 4   | B |
| 24144223 | Chicken, drumstick, fried, no coating, skin not eaten, made with oil                                                          | 5000_MPE | 60 | 51 | 9  | 1 | 4   | B |
| 24147220 | Chicken, drumstick, coated, baked or fried, prepared with skin, skin/coating not eaten, NS as to type of fat added in cooking | 5000_MPE | 60 | 51 | 9  | 1 | 4   | B |
| 24147223 | Chicken, drumstick, coated, baked or fried, prepared with skin, skin/coating not eaten, made with oil                         | 5000_MPE | 60 | 51 | 9  | 1 | 4   | B |
| 24147260 | Chicken, drumstick, coated, baked or fried, prepared skinless, coating not eaten, NS as to type of fat added in cooking       | 5000_MPE | 60 | 51 | 9  | 1 | 4   | B |
| 24147263 | Chicken, drumstick, coated, baked or fried, prepared skinless, coating not eaten, made with oil                               | 5000_MPE | 60 | 51 | 9  | 1 | 4   | B |
| 24201400 | Turkey, light or dark meat, stewed, NS as to skin eaten                                                                       | 5000_MPE | 60 | 51 | 9  | 1 | 4   | C |
| 24201420 | Turkey light or dark meat, stewed, skin eaten                                                                                 | 5000_MPE | 60 | 51 | 9  | 1 | 4   | C |
| 32103045 | Egg salad, made with light Italian dressing                                                                                   | 5000_MPE | 60 | 51 | 9  | 2 | 3   | C |
| 23323500 | Bear, cooked                                                                                                                  | 5000_MPE | 60 | 50 | 10 | 1 | 4   | C |
| 24102010 | Chicken, NS as to part, baked, broiled, or roasted, skin eaten                                                                | 5000_MPE | 60 | 50 | 10 | 1 | 4   | B |
| 24137301 | Chicken leg, drumstick and thigh, fried, coated, skin / coating not eaten                                                     | 5000_MPE | 60 | 50 | 10 | 1 | 4   | B |
| 24123100 | Chicken, breast, stewed, NS as to skin eaten                                                                                  | 5000_MPE | 60 | 49 | 11 | 1 | 4   | B |
| 24130220 | Chicken leg, drumstick and thigh, NS as to cooking method, skin not eaten                                                     | 5000_MPE | 60 | 49 | 11 | 1 | 4   | B |
| 24142300 | Chicken drumstick, baked, broiled, or roasted, skin eaten, from raw                                                           | 5000_MPE | 60 | 49 | 11 | 1 | 4   | B |
| 24198670 | Chicken, chicken roll, roasted                                                                                                | 5000_MPE | 60 | 49 | 11 | 1 | 4   | B |
| 32105048 | Egg omelet or scrambled egg, with mushrooms                                                                                   | 5000_MPE | 60 | 49 | 11 | 2 | 3.5 | B |
| 24133200 | Chicken, leg (drumstick and thigh), stewed, NS as to skin eaten                                                               | 5000_MPE | 60 | 48 | 12 | 1 | 4   | B |
| 31105020 | Egg, whole, fried with margarine                                                                                              | 5000_MPE | 60 | 48 | 12 | 2 | 3.5 | C |
| 32130900 | Egg omelet or scrambled egg, with meat and vegetables other than dark-green and/or tomatoes, no added fat                     | 5000_MPE | 60 | 46 | 14 | 1 | 3.5 | B |

|          |                                                                                                                    |          |    |    |    |   |     |   |
|----------|--------------------------------------------------------------------------------------------------------------------|----------|----|----|----|---|-----|---|
| 24164125 | Chicken, wing, fried, no coating, skin not eaten, made without fat                                                 | 5000_MPE | 60 | 45 | 15 | 1 | 4   | B |
| 24167119 | Chicken, wing, coated, baked or fried, prepared with skin, skin/coating not eaten, made without fat                | 5000_MPE | 60 | 45 | 15 | 1 | 4   | B |
| 23321250 | Venison/deer steak, breaded or floured, cooked, NS as to cooking method                                            | 5000_MPE | 59 | 55 | 4  | 2 | 4   | C |
| 32103030 | Egg salad, made with creamy dressing                                                                               | 5000_MPE | 59 | 55 | 4  | 2 | 3   | D |
| 24107050 | Chicken, NS as to part, coated, baked or fried, prepared skinless, coating eaten, fat added in cooking             | 5000_MPE | 59 | 53 | 6  | 1 | 4   | B |
| 24127140 | Chicken, breast, coated, baked or fried, prepared skinless, NS as to coating eaten, fat added in cooking           | 5000_MPE | 59 | 53 | 6  | 1 | 4   | B |
| 24127150 | Chicken, breast, coated, baked or fried, prepared skinless, coating eaten, NS as to type of fat added in cooking   | 5000_MPE | 59 | 53 | 6  | 1 | 4   | B |
| 24127153 | Chicken, breast, coated, baked or fried, prepared skinless, coating eaten, made with oil                           | 5000_MPE | 59 | 53 | 6  | 1 | 4   | B |
| 24201060 | Turkey, light meat, breaded, baked or fried, skin not eaten                                                        | 5000_MPE | 59 | 53 | 6  | 2 | 4.5 | A |
| 24123311 | Chicken breast, grilled with sauce, skin not eaten                                                                 | 5000_MPE | 59 | 52 | 7  | 2 | 4   | B |
| 24137250 | Chicken, leg (drumstick and thigh), coated, baked or fried, prepared skinless, coating eaten, fat added in cooking | 5000_MPE | 59 | 52 | 7  | 1 | 4   | A |
| 32103025 | Egg salad, made with light mayonnaise-type salad dressing                                                          | 5000_MPE | 59 | 52 | 7  | 2 | 3   | C |
| 24144300 | Chicken drumstick, sauteed, skin eaten                                                                             | 5000_MPE | 59 | 50 | 9  | 1 | 4   | B |
| 24103010 | Chicken, NS as to part, stewed, skin eaten                                                                         | 5000_MPE | 59 | 49 | 10 | 1 | 4   | B |
| 24120110 | Chicken breast, NS as to cooking method, skin eaten                                                                | 5000_MPE | 59 | 49 | 10 | 1 | 4   | A |
| 24122170 | Chicken breast, rotisserie, skin eaten                                                                             | 5000_MPE | 59 | 49 | 10 | 1 | 4   | A |
| 24124124 | Chicken, breast, fried, no coating, skin not eaten, made with cooking spray                                        | 5000_MPE | 59 | 49 | 10 | 1 | 4   | B |
| 24142210 | Chicken, drumstick, roasted, broiled, or baked, skin eaten                                                         | 5000_MPE | 59 | 49 | 10 | 1 | 3.5 | B |
| 24157301 | Chicken thigh, fried, coated, skin / coating not eaten, from raw                                                   | 5000_MPE | 59 | 49 | 10 | 1 | 4   | B |
| 32104100 | Egg, scrambled, made from dry eggs                                                                                 | 5000_MPE | 59 | 49 | 10 | 2 | 3   | C |
| 89901004 | Beef, for use with vegetables                                                                                      | 5000_MPE | 59 | 49 | 10 | 1 | 4.5 | B |
| 24154224 | Chicken, thigh, fried, no coating, skin not eaten, made with cooking spray                                         | 5000_MPE | 59 | 48 | 11 | 1 | 4   | B |
| 32103050 | Egg Salad, made with any type of fat free dressing                                                                 | 5000_MPE | 59 | 47 | 12 | 1 | 3.5 | C |
| 24153200 | Chicken, thigh, stewed, NS as to skin eaten                                                                        | 5000_MPE | 59 | 46 | 13 | 1 | 4   | B |
| 24163120 | Chicken, wing, stewed, skin not eaten                                                                              | 5000_MPE | 59 | 46 | 13 | 1 | 4   | A |
| 24198570 | Chicken, canned, meat only                                                                                         | 5000_MPE | 59 | 46 | 13 | 3 | 4   | C |
| 33401410 | Egg substitute, omelet, scrambled, or fried, with cheese and vegetables, fat not added in cooking                  | 5000_MPE | 58 | 57 | 1  | 3 | 3.5 | C |
| 24107040 | Chicken, NS as to part, coated, baked or fried, prepared skinless, NS as to coating eaten, fat added in cooking    | 5000_MPE | 58 | 52 | 6  | 1 | 4   | C |
| 24201070 | Turkey, light meat, breaded, baked or fried, skin eaten                                                            | 5000_MPE | 58 | 52 | 6  | 2 | 4   | A |
| 32103015 | Egg salad, made with light mayonnaise                                                                              | 5000_MPE | 58 | 51 | 7  | 2 | 3   | C |
| 24134100 | Chicken leg, drumstick and thigh, grilled without sauce, skin eaten                                                | 5000_MPE | 58 | 49 | 9  | 1 | 3.5 | C |
| 24134300 | Chicken leg, drumstick and thigh, sauteed, skin eaten                                                              | 5000_MPE | 58 | 49 | 9  | 1 | 3.5 | C |
| 32103035 | Egg salad, made with light creamy dressing                                                                         | 5000_MPE | 58 | 49 | 9  | 2 | 3.5 | C |
| 32105049 | Egg omelet or scrambled egg, with cheese and mushrooms                                                             | 5000_MPE | 58 | 49 | 9  | 2 | 3   | D |

|          |                                                                                                           |          |    |    |    |   |     |   |
|----------|-----------------------------------------------------------------------------------------------------------|----------|----|----|----|---|-----|---|
| 24100010 | Chicken, NS as to part and cooking method, skin eaten                                                     | 5000_MPE | 58 | 48 | 10 | 1 | 4   | B |
| 24102060 | Chicken, NS as to part, rotisserie, skin eaten                                                            | 5000_MPE | 58 | 48 | 10 | 1 | 4   | B |
| 24124110 | Chicken, breast, fried, no coating, skin eaten, NS as to type of fat added in cooking                     | 5000_MPE | 58 | 48 | 10 | 1 | 4   | C |
| 24124113 | Chicken, breast, fried, no coating, skin eaten, made with oil                                             | 5000_MPE | 58 | 48 | 10 | 1 | 4   | C |
| 24132230 | Chicken leg, drumstick and thigh, baked or broiled, skin eaten                                            | 5000_MPE | 58 | 48 | 10 | 1 | 4   | B |
| 24144210 | Chicken, drumstick, fried, no coating, skin eaten, NS as to type of fat added in cooking                  | 5000_MPE | 58 | 48 | 10 | 1 | 3.5 | D |
| 24144213 | Chicken, drumstick, fried, no coating, skin eaten, made with oil                                          | 5000_MPE | 58 | 48 | 10 | 1 | 3.5 | D |
| 24152301 | Chicken thigh, rotisserie, skin not eaten                                                                 | 5000_MPE | 58 | 48 | 10 | 1 | 4   | B |
| 24203000 | Turkey, wing, cooked, NS as to skin eaten                                                                 | 5000_MPE | 58 | 48 | 10 | 1 | 4   | B |
| 24140210 | Chicken drumstick, NS as to cooking method, skin eaten                                                    | 5000_MPE | 58 | 47 | 11 | 1 | 4   | B |
| 24142400 | Chicken drumstick, rotisserie, skin eaten                                                                 | 5000_MPE | 58 | 47 | 11 | 1 | 4   | B |
| 24143210 | Chicken drumstick, stewed, skin eaten                                                                     | 5000_MPE | 58 | 47 | 11 | 1 | 4   | B |
| 24150220 | Chicken thigh, NS as to cooking method, skin not eaten                                                    | 5000_MPE | 58 | 47 | 11 | 1 | 4   | B |
| 24154225 | Chicken, thigh, fried, no coating, skin not eaten, made without fat                                       | 5000_MPE | 58 | 47 | 11 | 1 | 4   | B |
| 31105005 | Egg, whole, fried, NS as to fat                                                                           | 5000_MPE | 58 | 47 | 11 | 1 | 3.5 | C |
| 32105110 | Egg omelet or scrambled egg, with beef                                                                    | 5000_MPE | 58 | 47 | 11 | 1 | 3.5 | C |
| 32131070 | Egg omelet or scrambled egg, with cheese, meat, tomatoes, and dark-green vegetables, no added fat         | 5000_MPE | 58 | 47 | 11 | 2 | 3.5 | C |
| 24144225 | Chicken, drumstick, fried, no coating, skin not eaten, made without fat                                   | 5000_MPE | 58 | 46 | 12 | 1 | 4   | B |
| 24147265 | Chicken, drumstick, coated, baked or fried, prepared skinless, coating not eaten, made without fat        | 5000_MPE | 58 | 46 | 12 | 1 | 4   | B |
| 31105085 | Egg, whole, fried, NS as to fat type                                                                      | 5000_MPE | 58 | 46 | 12 | 1 | 3.5 | C |
| 32131040 | Egg omelet or scrambled egg, with cheese, meat, and dark-green vegetables, no added fat                   | 5000_MPE | 58 | 46 | 12 | 2 | 3   | C |
| 32130810 | Egg omelet or scrambled egg, with meat and tomatoes, no added fat                                         | 5000_MPE | 58 | 44 | 14 | 1 | 3.5 | B |
| 24201050 | Turkey, light meat, breaded, baked or fried, NS as to skin eaten                                          | 5000_MPE | 57 | 51 | 6  | 2 | 4   | A |
| 23334100 | Beaver, cooked                                                                                            | 5000_MPE | 57 | 48 | 9  | 1 | 4   | C |
| 32130310 | Egg omelet or scrambled egg, with cheese and meat, made with oil                                          | 5000_MPE | 57 | 48 | 9  | 2 | 3   | D |
| 24132210 | Chicken, leg (drumstick and thigh), roasted, broiled, or baked, skin eaten                                | 5000_MPE | 57 | 47 | 10 | 1 | 3.5 | C |
| 32105055 | Egg omelet or scrambled egg, with cheese and vegetables other than dark-green                             | 5000_MPE | 57 | 47 | 10 | 2 | 3   | C |
| 32131060 | Egg omelet or scrambled egg, with cheese, meat, tomatoes, and dark-green vegetables, fat added            | 5000_MPE | 57 | 47 | 10 | 2 | 3   | D |
| 32131080 | Egg omelet or scrambled egg, with cheese, meat, tomatoes, and dark-green vegetables, NS as to fat         | 5000_MPE | 57 | 47 | 10 | 2 | 3   | D |
| 32130890 | Egg omelet or scrambled egg, with meat and vegetables other than dark-green and/or tomatoes, fat added    | 5000_MPE | 57 | 46 | 11 | 2 | 3   | C |
| 32130910 | Egg omelet or scrambled egg, with meat and vegetables other than dark-green and/or tomatoes, NS as to fat | 5000_MPE | 57 | 46 | 11 | 2 | 3   | C |
| 24127165 | Chicken, breast, coated, baked or fried, prepared skinless, coating not eaten, made without fat           | 5000_MPE | 57 | 45 | 12 | 1 | 4   | B |

|          |                                                                                                                    |          |    |    |    |   |     |   |
|----------|--------------------------------------------------------------------------------------------------------------------|----------|----|----|----|---|-----|---|
| 32130040 | Egg omelet or scrambled egg, made with animal fat or meat drippings                                                | 5000_MPE | 57 | 44 | 13 | 1 | 3   | C |
| 32400520 | Egg white, omelet, scrambled, or fried, with cheese and vegetables, NS as to fat added in cooking                  | 5000_MPE | 56 | 56 | 0  | 2 | 3.5 | C |
| 31109000 | Egg, white only, cooked, NS as to fat added in cooking                                                             | 5000_MPE | 56 | 53 | 3  | 2 | 4   | B |
| 31109020 | Egg, white only, cooked, fat added in cooking                                                                      | 5000_MPE | 56 | 53 | 3  | 2 | 4   | B |
| 25112200 | Liver paste or pate, chicken                                                                                       | 5000_MPE | 56 | 50 | 6  | 3 | 3.5 | C |
| 24103070 | Chicken, NS as to part, grilled with sauce, NS as to skin eaten                                                    | 5000_MPE | 56 | 48 | 8  | 2 | 3.5 | C |
| 24103080 | Chicken, NS as to part, grilled with sauce, skin not eaten                                                         | 5000_MPE | 56 | 48 | 8  | 2 | 3.5 | C |
| 31203000 | Quail egg, canned                                                                                                  | 5000_MPE | 56 | 48 | 8  | 3 | 3.5 | B |
| 24124121 | Chicken, breast, fried, no coating, skin not eaten, made with shortening                                           | 5000_MPE | 56 | 47 | 9  | 1 | 4   | B |
| 24154010 | Chicken thigh, grilled without sauce, skin eaten                                                                   | 5000_MPE | 56 | 47 | 9  | 1 | 3.5 | D |
| 24154300 | Chicken thigh, sauteed, skin eaten                                                                                 | 5000_MPE | 56 | 47 | 9  | 1 | 3.5 | D |
| 24152230 | Chicken thigh, baked, broiled, or roasted, skin eaten, from raw                                                    | 5000_MPE | 56 | 46 | 10 | 1 | 3.5 | C |
| 31107000 | Egg, whole, pickled                                                                                                | 5000_MPE | 56 | 46 | 10 | 3 | 3.5 | C |
| 32105116 | Egg omelet or scrambled egg, with sausage and dark-green vegetables                                                | 5000_MPE | 56 | 46 | 10 | 2 | 3.5 | C |
| 32131030 | Egg omelet or scrambled egg, with cheese, meat, and dark-green vegetables, fat added                               | 5000_MPE | 56 | 46 | 10 | 2 | 3   | D |
| 32131050 | Egg omelet or scrambled egg, with cheese, meat, and dark-green vegetables, NS as to fat                            | 5000_MPE | 56 | 46 | 10 | 2 | 3   | D |
| 24104010 | Chicken, NS as to part, fried, no coating, skin eaten, fat added in cooking                                        | 5000_MPE | 56 | 45 | 11 | 1 | 3.5 | D |
| 24124125 | Chicken, breast, fried, no coating, skin not eaten, made without fat                                               | 5000_MPE | 56 | 45 | 11 | 1 | 4   | B |
| 32130210 | Egg omelet or scrambled egg, with meat, made with oil                                                              | 5000_MPE | 56 | 45 | 11 | 2 | 3.5 | C |
| 32130800 | Egg omelet or scrambled egg, with meat and tomatoes, fat added                                                     | 5000_MPE | 56 | 45 | 11 | 2 | 3   | C |
| 32130820 | Egg omelet or scrambled egg, with meat and tomatoes, NS as to fat                                                  | 5000_MPE | 56 | 45 | 11 | 2 | 3   | C |
| 32131020 | Egg omelet or scrambled egg, with cheese, meat, and tomatoes, NS as to fat                                         | 5000_MPE | 56 | 45 | 11 | 2 | 3   | D |
| 24124115 | Chicken, breast, fried, no coating, skin eaten, made without fat                                                   | 5000_MPE | 56 | 44 | 12 | 1 | 4   | C |
| 24127115 | Chicken, breast, coated, baked or fried, prepared with skin, skin/coating eaten, made without fat                  | 5000_MPE | 56 | 44 | 12 | 1 | 4   | A |
| 24147255 | Chicken, drumstick, coated, baked or fried, prepared skinless, coating eaten, made without fat                     | 5000_MPE | 56 | 44 | 12 | 1 | 4   | A |
| 32130140 | Egg omelet or scrambled egg, with cheese, made with animal fat or meat drippings                                   | 5000_MPE | 56 | 44 | 12 | 2 | 3   | D |
| 32131010 | Egg omelet or scrambled egg, with cheese, meat, and tomatoes, no added fat                                         | 5000_MPE | 56 | 44 | 12 | 2 | 3   | C |
| 32131100 | Egg omelet or scrambled egg, with cheese, meat, and vegetables other than dark-green and/or tomatoes, no added fat | 5000_MPE | 56 | 44 | 12 | 2 | 3   | C |
| 24144215 | Chicken, drumstick, fried, no coating, skin eaten, made without fat                                                | 5000_MPE | 56 | 43 | 13 | 1 | 4   | C |
| 31105000 | Egg, whole, fried                                                                                                  | 5000_MPE | 56 | 43 | 13 | 2 | 3   | C |
| 31108100 | Egg, white, cooked, NS as to fat                                                                                   | 5000_MPE | 55 | 53 | 2  | 2 | 3.5 | B |
| 31108120 | Egg, white, cooked, fat added                                                                                      | 5000_MPE | 55 | 53 | 2  | 2 | 3.5 | B |
| 32400060 | Egg white omelet, scrambled, or fried, made with margarine                                                         | 5000_MPE | 55 | 52 | 3  | 2 | 4   | A |

|          |                                                                                                                             |          |    |    |    |   |     |   |
|----------|-----------------------------------------------------------------------------------------------------------------------------|----------|----|----|----|---|-----|---|
| 32400510 | Egg white, omelet, scrambled, or fried, with cheese and vegetables, fat not added in cooking                                | 5000_MPE | 55 | 50 | 5  | 2 | 3.5 | C |
| 24137240 | Chicken, leg (drumstick and thigh), coated, baked or fried, prepared skinless, NS as to coating eaten, fat added in cooking | 5000_MPE | 55 | 48 | 7  | 1 | 3.5 | C |
| 24147240 | Chicken, drumstick, coated, baked or fried, prepared skinless, NS as to coating eaten, fat added in cooking                 | 5000_MPE | 55 | 48 | 7  | 1 | 3.5 | C |
| 24147250 | Chicken, drumstick, coated, baked or fried, prepared skinless, coating eaten, NS as to type of fat added in cooking         | 5000_MPE | 55 | 48 | 7  | 1 | 3.5 | C |
| 24147253 | Chicken, drumstick, coated, baked or fried, prepared skinless, coating eaten, made with oil                                 | 5000_MPE | 55 | 48 | 7  | 1 | 3.5 | C |
| 24157240 | Chicken, thigh, coated, baked or fried, prepared skinless, NS as to coating eaten, fat added in cooking                     | 5000_MPE | 55 | 48 | 7  | 1 | 3.5 | C |
| 24157250 | Chicken, thigh, coated, baked or fried, prepared skinless, coating eaten, NS as to type of fat added in cooking             | 5000_MPE | 55 | 48 | 7  | 1 | 3.5 | C |
| 24157253 | Chicken, thigh, coated, baked or fried, prepared skinless, coating eaten, made with oil                                     | 5000_MPE | 55 | 48 | 7  | 1 | 3.5 | C |
| 32103040 | Egg salad, made with Italian dressing                                                                                       | 5000_MPE | 55 | 48 | 7  | 2 | 3   | C |
| 23322300 | Deer chop, cooked                                                                                                           | 5000_MPE | 55 | 47 | 8  | 2 | 4   | C |
| 24147302 | Chicken drumstick, fried, coated, prepared skinless, coating eaten, from raw                                                | 5000_MPE | 55 | 47 | 8  | 1 | 3.5 | B |
| 24311010 | Goose, wild, roasted                                                                                                        | 5000_MPE | 55 | 47 | 8  | 1 | 3.5 | D |
| 24147400 | Chicken drumstick, baked, coated, skin / coating eaten                                                                      | 5000_MPE | 55 | 46 | 9  | 1 | 4   | B |
| 24133210 | Chicken leg, drumstick and thigh, stewed, skin eaten                                                                        | 5000_MPE | 55 | 45 | 10 | 1 | 3.5 | B |
| 24152210 | Chicken, thigh, roasted, broiled, or baked, skin eaten                                                                      | 5000_MPE | 55 | 45 | 10 | 1 | 3.5 | D |
| 32105059 | Egg omelet or scrambled egg, with ham or bacon, and dark-green vegetables                                                   | 5000_MPE | 55 | 45 | 10 | 2 | 3.5 | C |
| 32131090 | Egg omelet or scrambled egg, with cheese, meat, and vegetables other than dark-green and/or tomatoes, fat added             | 5000_MPE | 55 | 45 | 10 | 2 | 3   | D |
| 32131110 | Egg omelet or scrambled egg, with cheese, meat, and vegetables other than dark-green and/or tomatoes, NS as to fat          | 5000_MPE | 55 | 45 | 10 | 2 | 3   | D |
| 24127154 | Chicken, breast, coated, baked or fried, prepared skinless, coating eaten, made with cooking spray                          | 5000_MPE | 55 | 44 | 11 | 1 | 4   | A |
| 24130210 | Chicken leg, drumstick and thigh, NS as to cooking method, skin eaten                                                       | 5000_MPE | 55 | 44 | 11 | 1 | 4   | B |
| 24132240 | Chicken leg, drumstick and thigh, rotisserie, skin eaten                                                                    | 5000_MPE | 55 | 44 | 11 | 1 | 4   | B |
| 24144221 | Chicken, drumstick, fried, no coating, skin not eaten, made with shortening                                                 | 5000_MPE | 55 | 44 | 11 | 1 | 3.5 | C |
| 24154221 | Chicken, thigh, fried, no coating, skin not eaten, made with shortening                                                     | 5000_MPE | 55 | 44 | 11 | 1 | 4   | C |
| 32130300 | Egg omelet or scrambled egg, with cheese and meat, made with margarine                                                      | 5000_MPE | 55 | 44 | 11 | 2 | 3   | D |
| 32131000 | Egg omelet or scrambled egg, with cheese, meat, and tomatoes, fat added                                                     | 5000_MPE | 55 | 44 | 11 | 2 | 3   | D |
| 32130360 | Egg omelet or scrambled egg, with cheese and meat, made with cooking spray                                                  | 5000_MPE | 55 | 43 | 12 | 2 | 3.5 | D |
| 32130370 | Egg omelet or scrambled egg, with cheese and meat, no added fat                                                             | 5000_MPE | 55 | 43 | 12 | 2 | 3.5 | D |
| 32130880 | Egg omelet or scrambled egg, with meat, tomatoes, and dark-green vegetables, NS as to fat                                   | 5000_MPE | 55 | 43 | 12 | 2 | 3   | C |
| 32130020 | Egg omelet or scrambled egg, made with butter                                                                               | 5000_MPE | 55 | 42 | 13 | 1 | 3   | D |



|          |                                                                                                                        |          |    |    |    |   |     |   |
|----------|------------------------------------------------------------------------------------------------------------------------|----------|----|----|----|---|-----|---|
| 32130870 | Egg omelet or scrambled egg, with meat, tomatoes, and dark-green vegetables, no added fat                              | 5000_MPE | 55 | 41 | 14 | 2 | 3.5 | C |
| 33401400 | Egg substitute, omelet, scrambled, or fried, with cheese and vegetables                                                | 5000_MPE | 54 | 56 | -2 | 3 | 3.5 | C |
| 33001010 | Egg substitute, omelet, scrambled, or fried, fat added                                                                 | 5000_MPE | 54 | 55 | -1 | 3 | 3.5 | B |
| 32400500 | Egg white, omelet, scrambled, or fried, with cheese and vegetables                                                     | 5000_MPE | 54 | 53 | 1  | 2 | 3.5 | C |
| 24127200 | Chicken breast, fried, coated, skin / coating eaten, from raw                                                          | 5000_MPE | 54 | 48 | 6  | 1 | 4   | B |
| 27146010 | Chicken or turkey with barbecue sauce, skin not eaten                                                                  | 5000_MPE | 54 | 47 | 7  | 2 | 4   | B |
| 24142511 | Chicken drumstick, grilled with sauce, skin not eaten                                                                  | 5000_MPE | 54 | 45 | 9  | 2 | 3.5 | D |
| 24164000 | Chicken wing, grilled without sauce                                                                                    | 5000_MPE | 54 | 45 | 9  | 1 | 3.5 | D |
| 32105117 | Egg omelet or scrambled egg, with sausage, cheese, and dark-green vegetables                                           | 5000_MPE | 54 | 45 | 9  | 2 | 3   | D |
| 22701020 | Pork, spareribs, cooked, lean only eaten                                                                               | 5000_MPE | 54 | 44 | 10 | 1 | 4   | C |
| 24153210 | Chicken thigh, stewed, skin eaten                                                                                      | 5000_MPE | 54 | 44 | 10 | 1 | 3.5 | C |
| 32105010 | Egg omelet or scrambled egg, with cheese                                                                               | 5000_MPE | 54 | 44 | 10 | 2 | 2   | D |
| 32130290 | Egg omelet or scrambled egg, with cheese and meat, NS as to fat                                                        | 5000_MPE | 54 | 44 | 10 | 2 | 3   | D |
| 32130365 | Egg omelet or scrambled egg, with cheese and meat, NS as to fat type                                                   | 5000_MPE | 54 | 44 | 10 | 2 | 3   | D |
| 24127155 | Chicken, breast, coated, baked or fried, prepared skinless, coating eaten, made without fat                            | 5000_MPE | 54 | 43 | 11 | 1 | 4   | A |
| 24150210 | Chicken thigh, NS as to cooking method, skin eaten                                                                     | 5000_MPE | 54 | 43 | 11 | 1 | 4   | B |
| 24152300 | Chicken thigh, rotisserie, skin eaten                                                                                  | 5000_MPE | 54 | 43 | 11 | 1 | 4   | B |
| 32130120 | Egg omelet or scrambled egg, with cheese, made with butter                                                             | 5000_MPE | 54 | 43 | 11 | 2 | 2   | D |
| 32130860 | Egg omelet or scrambled egg, with meat, tomatoes, and dark-green vegetables, fat added                                 | 5000_MPE | 54 | 43 | 11 | 2 | 3   | C |
| 24164122 | Chicken, wing, fried, no coating, skin not eaten, made with butter                                                     | 5000_MPE | 54 | 39 | 15 | 1 | 4   | C |
| 32400075 | Egg white omelet, scrambled, or fried, made with cooking spray                                                         | 5000_MPE | 53 | 47 | 6  | 1 | 4   | A |
| 24127100 | Chicken, breast, coated, baked or fried, prepared with skin, NS as to skin/coating eaten, fat added in cooking         | 5000_MPE | 53 | 45 | 8  | 1 | 3.5 | D |
| 24127110 | Chicken, breast, coated, baked or fried, prepared with skin, skin/coating eaten, NS as to type of fat added in cooking | 5000_MPE | 53 | 45 | 8  | 1 | 3.5 | D |
| 24127113 | Chicken, breast, coated, baked or fried, prepared with skin, skin/coating eaten, made with oil                         | 5000_MPE | 53 | 45 | 8  | 1 | 3.5 | D |
| 24157302 | Chicken thigh, fried, coated, prepared skinless, coating eaten, from raw                                               | 5000_MPE | 53 | 45 | 8  | 1 | 4   | B |
| 23310000 | Rabbit, NS as to domestic or wild, cooked                                                                              | 5000_MPE | 53 | 44 | 9  | 1 | 4   | C |
| 23311100 | Rabbit, domestic, NS as to cooking method                                                                              | 5000_MPE | 53 | 44 | 9  | 1 | 4   | C |
| 24123310 | Chicken breast, grilled with sauce, skin eaten                                                                         | 5000_MPE | 53 | 44 | 9  | 2 | 3.5 | C |
| 24137310 | Chicken leg, drumstick and thigh, baked, coated, skin / coating eaten                                                  | 5000_MPE | 53 | 44 | 9  | 1 | 3.5 | C |
| 24157400 | Chicken thigh, baked, coated, skin / coating eaten                                                                     | 5000_MPE | 53 | 44 | 9  | 1 | 3.5 | C |
| 24164200 | Chicken wing, sauteed                                                                                                  | 5000_MPE | 53 | 44 | 9  | 1 | 3.5 | D |
| 32105081 | Egg omelet or scrambled egg, with ham or bacon, cheese, and dark-green vegetables                                      | 5000_MPE | 53 | 44 | 9  | 2 | 3   | D |
| 22201020 | Pork steak or cutlet, NS as to cooking method, lean only eaten                                                         | 5000_MPE | 53 | 42 | 11 | 1 | 4   | C |

|          |                                                                                                                           |          |    |    |    |   |     |   |
|----------|---------------------------------------------------------------------------------------------------------------------------|----------|----|----|----|---|-----|---|
| 22201120 | Pork steak or cutlet, broiled or baked, lean only eaten                                                                   | 5000_MPE | 53 | 42 | 11 | 1 | 4   | C |
| 23150100 | Goat, boiled                                                                                                              | 5000_MPE | 53 | 42 | 11 | 1 | 4   | C |
| 23150250 | Goat, baked                                                                                                               | 5000_MPE | 53 | 42 | 11 | 1 | 4   | C |
| 23150300 | Goat ribs, cooked                                                                                                         | 5000_MPE | 53 | 42 | 11 | 1 | 4   | C |
| 24127141 | Chicken, breast, coated, baked or fried, prepared skinless, NS as to coating eaten, fat not added in cooking              | 5000_MPE | 53 | 42 | 11 | 1 | 4   | A |
| 24162130 | Chicken wing, baked, broiled, or roasted, from raw                                                                        | 5000_MPE | 53 | 42 | 11 | 1 | 3.5 | D |
| 23311200 | Rabbit, wild, cooked                                                                                                      | 5000_MPE | 53 | 41 | 12 | 1 | 4.5 | C |
| 24122151 | Chicken breast, baked or broiled, skin not eaten, from fast food / restaurant                                             | 5000_MPE | 52 | 53 | -1 | 4 | 4   | B |
| 33401020 | Egg substitute, omelet, scrambled, or fried, with cheese, NS as to fat added in cooking                                   | 5000_MPE | 52 | 52 | 0  | 3 | 3   | D |
| 24134151 | Chicken leg, drumstick and thigh, grilled with sauce, skin not eaten                                                      | 5000_MPE | 52 | 44 | 8  | 2 | 3.5 | D |
| 24147200 | Chicken, drumstick, coated, baked or fried, prepared with skin, NS as to skin/coating eaten, fat added in cooking         | 5000_MPE | 52 | 44 | 8  | 1 | 3.5 | D |
| 24147210 | Chicken, drumstick, coated, baked or fried, prepared with skin, skin/coating eaten, NS as to type of fat added in cooking | 5000_MPE | 52 | 44 | 8  | 1 | 3.5 | D |
| 24147213 | Chicken, drumstick, coated, baked or fried, prepared with skin, skin/coating eaten, made with oil                         | 5000_MPE | 52 | 44 | 8  | 1 | 3.5 | D |
| 24205000 | Turkey, tail                                                                                                              | 5000_MPE | 52 | 44 | 8  | 1 | 2   | D |
| 24154021 | Chicken thigh, grilled with sauce, skin not eaten                                                                         | 5000_MPE | 52 | 43 | 9  | 2 | 3.5 | D |
| 23150200 | Goat, fried                                                                                                               | 5000_MPE | 52 | 42 | 10 | 1 | 4   | C |
| 24134210 | Chicken, leg (drumstick and thigh), fried, no coating, skin eaten, fat added in cooking                                   | 5000_MPE | 52 | 42 | 10 | 1 | 3.5 | D |
| 24160100 | Chicken, wing, NS as to cooking method, NS as to skin eaten                                                               | 5000_MPE | 52 | 42 | 10 | 1 | 3.5 | D |
| 24162100 | Chicken, wing, roasted, broiled, or baked, NS as to skin eaten                                                            | 5000_MPE | 52 | 42 | 10 | 1 | 3.5 | D |
| 24162110 | Chicken, wing, roasted, broiled, or baked, skin eaten                                                                     | 5000_MPE | 52 | 42 | 10 | 1 | 3.5 | D |
| 22000100 | Pork, NS as to cut, cooked, NS as to fat eaten                                                                            | 5000_MPE | 52 | 41 | 11 | 1 | 3.5 | D |
| 22000110 | Pork, NS as to cut, cooked, lean and fat eaten                                                                            | 5000_MPE | 52 | 41 | 11 | 1 | 3.5 | D |
| 22101000 | Pork chop, NS as to cooking method, NS as to fat eaten                                                                    | 5000_MPE | 52 | 41 | 11 | 1 | 3.5 | D |
| 22101010 | Pork chop, NS as to cooking method, lean and fat eaten                                                                    | 5000_MPE | 52 | 41 | 11 | 1 | 3.5 | D |
| 22101100 | Pork chop, broiled or baked, NS as to fat eaten                                                                           | 5000_MPE | 52 | 41 | 11 | 1 | 3.5 | D |
| 22101110 | Pork chop, broiled or baked, lean and fat eaten                                                                           | 5000_MPE | 52 | 41 | 11 | 1 | 3.5 | D |
| 23326100 | Bison, cooked                                                                                                             | 5000_MPE | 52 | 41 | 11 | 1 | 4.5 | B |
| 24170200 | Chicken, back                                                                                                             | 5000_MPE | 52 | 41 | 11 | 1 | 3.5 | D |
| 24137251 | Chicken, leg (drumstick and thigh), coated, baked or fried, prepared skinless, coating eaten, fat not added in cooking    | 5000_MPE | 52 | 40 | 12 | 1 | 4   | B |
| 24157255 | Chicken, thigh, coated, baked or fried, prepared skinless, coating eaten, made without fat                                | 5000_MPE | 52 | 40 | 12 | 1 | 4   | B |
| 24400000 | Cornish game hen, cooked, NS as to skin eaten                                                                             | 5000_MPE | 52 | 40 | 12 | 1 | 3.5 | D |
| 24400010 | Cornish game hen, cooked, skin eaten                                                                                      | 5000_MPE | 52 | 40 | 12 | 1 | 3.5 | D |
| 24401000 | Cornish game hen, roasted, NS as to skin eaten                                                                            | 5000_MPE | 52 | 40 | 12 | 1 | 3.5 | D |
| 24401010 | Cornish game hen, roasted, skin eaten                                                                                     | 5000_MPE | 52 | 40 | 12 | 1 | 3.5 | D |
| 32130190 | Egg omelet or scrambled egg, with meat, NS as to fat                                                                      | 5000_MPE | 52 | 40 | 12 | 2 | 3   | C |

|          |                                                                                                                       |          |    |    |    |   |     |   |
|----------|-----------------------------------------------------------------------------------------------------------------------|----------|----|----|----|---|-----|---|
| 32130200 | Egg omelet or scrambled egg, with meat, made with margarine                                                           | 5000_MPE | 52 | 40 | 12 | 2 | 3.5 | C |
| 32130265 | Egg omelet or scrambled egg, with meat, NS as to fat type                                                             | 5000_MPE | 52 | 40 | 12 | 2 | 3   | C |
| 24154222 | Chicken, thigh, fried, no coating, skin not eaten, made with butter                                                   | 5000_MPE | 52 | 39 | 13 | 1 | 3.5 | C |
| 32130260 | Egg omelet or scrambled egg, with meat, made with cooking spray                                                       | 5000_MPE | 52 | 39 | 13 | 2 | 3.5 | C |
| 31105060 | Egg, whole, fried with animal fat or meat drippings                                                                   | 5000_MPE | 52 | 38 | 14 | 1 | 3   | C |
| 32130270 | Egg omelet or scrambled egg, with meat, no added fat                                                                  | 5000_MPE | 52 | 37 | 15 | 2 | 3.5 | C |
| 33000990 | Egg substitute, omelet, scrambled, or fried, NS as to fat added in cooking                                            | 5000_MPE | 51 | 52 | -1 | 3 | 3.5 | C |
| 33001035 | Egg substitute, omelet, scrambled, or fried, NS as to type of fat                                                     | 5000_MPE | 51 | 52 | -1 | 3 | 3.5 | C |
| 32400050 | Egg white omelet or scrambled egg, with cheese                                                                        | 5000_MPE | 51 | 49 | 2  | 2 | 3.5 | C |
| 24302010 | Duck, pressed, Chinese                                                                                                | 5000_MPE | 51 | 47 | 4  | 1 | 3   | C |
| 24208000 | Turkey, nuggets                                                                                                       | 5000_MPE | 51 | 46 | 5  | 3 | 4   | B |
| 21401400 | Beef, roast, canned                                                                                                   | 5000_MPE | 51 | 45 | 6  | 3 | 4   | C |
| 24107000 | Chicken, NS as to part, coated, baked or fried, prepared with skin, NS as to skin/coating eaten, fat added in cooking | 5000_MPE | 51 | 43 | 8  | 1 | 3.5 | D |
| 24107010 | Chicken, NS as to part, coated, baked or fried, prepared with skin, skin/coating eaten, fat added in cooking          | 5000_MPE | 51 | 43 | 8  | 1 | 3.5 | D |
| 24147300 | Chicken drumstick, fried, coated, skin / coating eaten, from raw                                                      | 5000_MPE | 51 | 43 | 8  | 1 | 3.5 | B |
| 23331100 | Ground hog, cooked                                                                                                    | 5000_MPE | 51 | 41 | 10 | 1 | 4   | C |
| 24162200 | Chicken wing, rotisserie                                                                                              | 5000_MPE | 51 | 41 | 10 | 1 | 2   | D |
| 21000100 | Beef, NS as to cut, cooked, NS as to fat eaten                                                                        | 5000_MPE | 51 | 40 | 11 | 1 | 4   | C |
| 21000120 | Beef, NS as to cut, cooked, lean only eaten                                                                           | 5000_MPE | 51 | 40 | 11 | 1 | 4   | C |
| 21001000 | Steak, NS as to type of meat, cooked, NS as to fat eaten                                                              | 5000_MPE | 51 | 40 | 11 | 1 | 4   | C |
| 21001020 | Steak, NS as to type of meat, cooked, lean only eaten                                                                 | 5000_MPE | 51 | 40 | 11 | 1 | 4   | C |
| 21101000 | Beef steak, NS as to cooking method, NS as to fat eaten                                                               | 5000_MPE | 51 | 40 | 11 | 1 | 4   | C |
| 21101020 | Beef steak, NS as to cooking method, lean only eaten                                                                  | 5000_MPE | 51 | 40 | 11 | 1 | 4   | C |
| 21101110 | Beef steak, broiled or baked, NS as to fat eaten                                                                      | 5000_MPE | 51 | 40 | 11 | 1 | 4   | C |
| 21101130 | Beef steak, broiled or baked, lean only eaten                                                                         | 5000_MPE | 51 | 40 | 11 | 1 | 4   | C |
| 21401110 | Beef, roast, roasted, lean and fat eaten                                                                              | 5000_MPE | 51 | 40 | 11 | 1 | 4   | C |
| 22210300 | Pork, tenderloin, cooked, NS as to cooking method                                                                     | 5000_MPE | 51 | 40 | 11 | 1 | 4   | C |
| 22210400 | Pork, tenderloin, baked                                                                                               | 5000_MPE | 51 | 40 | 11 | 1 | 4   | C |
| 22301120 | Ham, fresh, cooked, lean only eaten                                                                                   | 5000_MPE | 51 | 40 | 11 | 1 | 4   | C |
| 24160110 | Chicken wing, NS as to cooking method                                                                                 | 5000_MPE | 51 | 40 | 11 | 1 | 2   | D |
| 23321000 | Venison/deer, NFS                                                                                                     | 5000_MPE | 51 | 39 | 12 | 1 | 4.5 | C |
| 23321100 | Venison/deer, roasted                                                                                                 | 5000_MPE | 51 | 39 | 12 | 1 | 4.5 | C |
| 23322350 | Venison/deer ribs, cooked                                                                                             | 5000_MPE | 51 | 39 | 12 | 1 | 4.5 | C |
| 23322400 | Venison/deer, stewed                                                                                                  | 5000_MPE | 51 | 39 | 12 | 1 | 4.5 | C |
| 23323100 | Moose, cooked                                                                                                         | 5000_MPE | 51 | 39 | 12 | 1 | 4.5 | B |
| 32101000 | Egg, creamed                                                                                                          | 5000_MPE | 51 | 39 | 12 | 1 | 3   | C |
| 24198500 | Chicken feet                                                                                                          | 5000_MPE | 51 | 38 | 13 | 1 | 4   | A |

|          |                                                                                                                                   |          |    |    |    |   |     |   |
|----------|-----------------------------------------------------------------------------------------------------------------------------------|----------|----|----|----|---|-----|---|
| 32130340 | Egg omelet or scrambled egg, with cheese and meat, made with animal fat or meat drippings                                         | 5000_MPE | 51 | 38 | 13 | 2 | 3   | D |
| 24144222 | Chicken, drumstick, fried, no coating, skin not eaten, made with butter                                                           | 5000_MPE | 51 | 37 | 14 | 1 | 3.5 | D |
| 32400055 | Egg white omelet, scrambled, or fried, NS as to fat                                                                               | 5000_MPE | 50 | 47 | 3  | 2 | 3.5 | B |
| 32400078 | Egg white omelet, scrambled, or fried, NS as to fat type                                                                          | 5000_MPE | 50 | 47 | 3  | 2 | 3.5 | B |
| 21500000 | Ground beef, raw                                                                                                                  | 5000_MPE | 50 | 41 | 9  | 1 | 3.5 | C |
| 24103075 | Chicken, NS as to part, grilled with sauce, skin eaten                                                                            | 5000_MPE | 50 | 41 | 9  | 2 | 3.5 | D |
| 24167300 | Chicken wing, baked, coated                                                                                                       | 5000_MPE | 50 | 41 | 9  | 1 | 3.5 | D |
| 24301210 | Duck, coated, fried                                                                                                               | 5000_MPE | 50 | 40 | 10 | 1 | 4   | B |
| 20000000 | Meat, NFS                                                                                                                         | 5000_MPE | 50 | 39 | 11 | 1 | 4   | C |
| 22400120 | Pork roast, NS as to cut, cooked, lean only eaten                                                                                 | 5000_MPE | 50 | 39 | 11 | 1 | 4   | C |
| 22401020 | Pork roast, loin, cooked, lean only eaten                                                                                         | 5000_MPE | 50 | 39 | 11 | 1 | 4   | C |
| 24164100 | Chicken, wing, fried, no coating, NS as to skin eaten, fat added in cooking                                                       | 5000_MPE | 50 | 39 | 11 | 1 | 3.5 | D |
| 24164110 | Chicken, wing, fried, no coating, skin eaten, NS as to type of fat added in cooking                                               | 5000_MPE | 50 | 39 | 11 | 1 | 3.5 | D |
| 24164113 | Chicken, wing, fried, no coating, skin eaten, made with oil                                                                       | 5000_MPE | 50 | 39 | 11 | 1 | 3.5 | D |
| 32105118 | Egg omelet or scrambled egg, with sausage and vegetables other than dark-green                                                    | 5000_MPE | 50 | 39 | 11 | 2 | 3.5 | C |
| 22000120 | Pork, NS as to cut, cooked, lean only eaten                                                                                       | 5000_MPE | 50 | 38 | 12 | 1 | 4   | C |
| 22101020 | Pork chop, NS as to cooking method, lean only eaten                                                                               | 5000_MPE | 50 | 38 | 12 | 1 | 4   | C |
| 22101120 | Pork chop, broiled or baked, lean only eaten                                                                                      | 5000_MPE | 50 | 38 | 12 | 1 | 4   | C |
| 23204030 | Veal cutlet or steak, NS as to cooking method, lean only eaten                                                                    | 5000_MPE | 50 | 38 | 12 | 1 | 4   | C |
| 23204220 | Veal cutlet or steak, broiled, lean only eaten                                                                                    | 5000_MPE | 50 | 38 | 12 | 1 | 4   | C |
| 24124122 | Chicken, breast, fried, no coating, skin not eaten, made with butter                                                              | 5000_MPE | 50 | 38 | 12 | 1 | 4   | C |
| 24163110 | Chicken wing, stewed                                                                                                              | 5000_MPE | 50 | 38 | 12 | 1 | 3.5 | D |
| 24144212 | Chicken, drumstick, fried, no coating, skin eaten, made with butter                                                               | 5000_MPE | 50 | 37 | 13 | 1 | 3.5 | D |
| 24163100 | Chicken, wing, stewed, NS as to skin eaten                                                                                        | 5000_MPE | 50 | 37 | 13 | 1 | 3.5 | D |
| 31105040 | Egg, whole, fried with butter                                                                                                     | 5000_MPE | 50 | 36 | 14 | 1 | 3   | D |
| 41810250 | bacon bits, meatless                                                                                                              | 5000_MPE | 49 | 56 | -7 | 4 | 1.5 | E |
| 32400120 | Egg white, omelet, scrambled, or fried, with cheese, NS as to fat added in cooking                                                | 5000_MPE | 49 | 47 | 2  | 2 | 3   | D |
| 22210310 | Pork, tenderloin, breaded, fried                                                                                                  | 5000_MPE | 49 | 46 | 3  | 2 | 3.5 | D |
| 24127151 | Chicken, breast, coated, baked or fried, prepared skinless, coating eaten, made with shortening                                   | 5000_MPE | 49 | 41 | 8  | 2 | 4   | C |
| 24137300 | Chicken leg, drumstick and thigh, fried, coated, skin / coating eaten                                                             | 5000_MPE | 49 | 41 | 8  | 1 | 3.5 | C |
| 24157300 | Chicken thigh, fried, coated, skin / coating eaten, from raw                                                                      | 5000_MPE | 49 | 41 | 8  | 1 | 3.5 | D |
| 31108010 | Egg, white only, raw                                                                                                              | 5000_MPE | 49 | 41 | 8  | 1 | 4   | A |
| 24137200 | Chicken, leg (drumstick and thigh), coated, baked or fried, prepared with skin, NS as to skin/coating eaten, fat added in cooking | 5000_MPE | 49 | 40 | 9  | 1 | 3.5 | D |
| 24137210 | Chicken, leg (drumstick and thigh), coated, baked or fried, prepared with skin, skin/coating eaten, fat added in cooking          | 5000_MPE | 49 | 40 | 9  | 1 | 3.5 | D |
| 24142510 | Chicken drumstick, grilled with sauce, skin eaten                                                                                 | 5000_MPE | 49 | 40 | 9  | 2 | 3.5 | D |

|          |                                                                                                                           |          |    |    |    |   |     |   |
|----------|---------------------------------------------------------------------------------------------------------------------------|----------|----|----|----|---|-----|---|
| 22201320 | Pork steak or cutlet, breaded or floured, broiled or baked, lean only eaten                                               | 5000_MPE | 49 | 39 | 10 | 1 | 3.5 | C |
| 23108020 | Lamb, shoulder, cooked, lean only eaten                                                                                   | 5000_MPE | 49 | 39 | 10 | 1 | 4   | C |
| 24134150 | Chicken leg, drumstick and thigh, grilled with sauce, skin eaten                                                          | 5000_MPE | 49 | 39 | 10 | 2 | 3   | D |
| 21401000 | Beef, roast, roasted, NS as to fat eaten                                                                                  | 5000_MPE | 49 | 38 | 11 | 1 | 4   | C |
| 22210350 | Pork, tenderloin, braised                                                                                                 | 5000_MPE | 49 | 37 | 12 | 1 | 4   | C |
| 23200120 | Veal, NS as to cut, cooked, lean only eaten                                                                               | 5000_MPE | 49 | 37 | 12 | 1 | 4   | C |
| 24107001 | Chicken, NS as to part, coated, baked or fried, prepared with skin, NS as to skin/coating eaten, fat not added in cooking | 5000_MPE | 49 | 37 | 12 | 1 | 3.5 | D |
| 24147215 | Chicken, drumstick, coated, baked or fried, prepared with skin, skin/coating eaten, made without fat                      | 5000_MPE | 49 | 37 | 12 | 1 | 4   | C |
| 24164115 | Chicken, wing, fried, no coating, skin eaten, made without fat                                                            | 5000_MPE | 49 | 37 | 12 | 1 | 3.5 | D |
| 24180200 | Chicken, neck or ribs                                                                                                     | 5000_MPE | 49 | 37 | 12 | 1 | 3.5 | D |
| 25170110 | Tripe, cooked                                                                                                             | 5000_MPE | 49 | 35 | 14 | 1 | 3.5 | C |
| 24198695 | Chicken patty, fillet, or tenders, breaded, cooked, from school lunch                                                     | 5000_MPE | 48 | 52 | -4 | 4 | 3.5 | C |
| 22101130 | Pork chop, breaded or floured, broiled or baked, NS as to fat eaten                                                       | 5000_MPE | 48 | 41 | 7  | 2 | 3.5 | D |
| 22101140 | Pork chop, breaded or floured, broiled or baked, lean and fat eaten                                                       | 5000_MPE | 48 | 41 | 7  | 2 | 3.5 | D |
| 22101150 | Pork chop, breaded or floured, broiled or baked, lean only eaten                                                          | 5000_MPE | 48 | 40 | 8  | 2 | 4   | C |
| 24167113 | Chicken, wing, coated, baked or fried, prepared with skin, skin/coating eaten, made with oil                              | 5000_MPE | 48 | 40 | 8  | 1 | 3.5 | D |
| 24167100 | Chicken, wing, coated, baked or fried, prepared with skin, NS as to skin/coating eaten, fat added in cooking              | 5000_MPE | 48 | 39 | 9  | 1 | 3.5 | D |
| 24167110 | Chicken, wing, coated, baked or fried, prepared with skin, skin/coating eaten, NS as to type of fat added in cooking      | 5000_MPE | 48 | 39 | 9  | 1 | 3.5 | D |
| 22201000 | Pork steak or cutlet, NS as to cooking method, NS as to fat eaten                                                         | 5000_MPE | 48 | 38 | 10 | 1 | 3.5 | D |
| 22201010 | Pork steak or cutlet, NS as to cooking method, lean and fat eaten                                                         | 5000_MPE | 48 | 38 | 10 | 1 | 3.5 | D |
| 22201100 | Pork steak or cutlet, broiled or baked, NS as to fat eaten                                                                | 5000_MPE | 48 | 38 | 10 | 1 | 3.5 | D |
| 22201110 | Pork steak or cutlet, broiled or baked, lean and fat eaten                                                                | 5000_MPE | 48 | 38 | 10 | 1 | 3.5 | D |
| 22400100 | Pork roast, NS as to cut, cooked, NS as to fat eaten                                                                      | 5000_MPE | 48 | 38 | 10 | 1 | 3.5 | D |
| 22400110 | Pork roast, NS as to cut, cooked, lean and fat eaten                                                                      | 5000_MPE | 48 | 38 | 10 | 1 | 3.5 | D |
| 22401000 | Pork roast, loin, cooked, NS as to fat eaten                                                                              | 5000_MPE | 48 | 38 | 10 | 1 | 3.5 | D |
| 22401010 | Pork roast, loin, cooked, lean and fat eaten                                                                              | 5000_MPE | 48 | 38 | 10 | 1 | 3.5 | D |
| 22705010 | Pork ears, tail, head, snout, miscellaneous parts, cooked                                                                 | 5000_MPE | 48 | 38 | 10 | 1 | 3.5 | C |
| 24154020 | Chicken thigh, grilled with sauce, skin eaten                                                                             | 5000_MPE | 48 | 38 | 10 | 1 | 3   | D |
| 32105119 | Egg omelet or scrambled egg, with sausage, cheese, and vegetables other than dark-green                                   | 5000_MPE | 48 | 38 | 10 | 2 | 3   | D |
| 21000110 | Beef, NS as to cut, cooked, lean and fat eaten                                                                            | 5000_MPE | 48 | 37 | 11 | 1 | 3.5 | D |
| 21101010 | Beef steak, NS as to cooking method, lean and fat eaten                                                                   | 5000_MPE | 48 | 37 | 11 | 1 | 3.5 | D |
| 21101120 | Beef steak, broiled or baked, lean and fat eaten                                                                          | 5000_MPE | 48 | 37 | 11 | 1 | 3.5 | D |
| 22411020 | Pork roast, shoulder, cooked, lean only eaten                                                                             | 5000_MPE | 48 | 37 | 11 | 1 | 3.5 | C |
| 32105082 | Egg omelet or scrambled egg, with ham or bacon, cheese, and vegetables other than dark-green                              | 5000_MPE | 48 | 37 | 11 | 2 | 3   | D |
| 22201220 | Pork steak or cutlet, fried, lean only eaten                                                                              | 5000_MPE | 48 | 36 | 12 | 1 | 4   | C |

|          |                                                                                      |          |    |    |    |   |     |   |
|----------|--------------------------------------------------------------------------------------|----------|----|----|----|---|-----|---|
| 23101020 | Lamb chop, NS as to cut, cooked, lean only eaten                                     | 5000_MPE | 48 | 36 | 12 | 1 | 4   | C |
| 23104020 | Lamb, loin chop, cooked, lean only eaten                                             | 5000_MPE | 48 | 36 | 12 | 1 | 4   | C |
| 23321200 | Venison/deer steak, cooked, NS as to cooking method                                  | 5000_MPE | 48 | 36 | 12 | 1 | 4   | C |
| 23340100 | Armadillo, cooked                                                                    | 5000_MPE | 48 | 36 | 12 | 1 | 4.5 | B |
| 32105060 | Egg omelet or scrambled egg, with ham or bacon and vegetables other than dark-green  | 5000_MPE | 48 | 36 | 12 | 2 | 3.5 | C |
| 32130320 | Egg omelet or scrambled egg, with cheese and meat, made with butter                  | 5000_MPE | 48 | 36 | 12 | 2 | 2   | D |
| 21401120 | Beef, roast, roasted, lean only eaten                                                | 5000_MPE | 48 | 35 | 13 | 1 | 4   | C |
| 33401000 | Egg substitute, omelet, scrambled, or fried, with cheese                             | 5000_MPE | 47 | 48 | -1 | 3 | 3.5 | C |
| 33401500 | Egg substitute, omelet, scrambled, or fried, with meat and vegetables                | 5000_MPE | 47 | 46 | 1  | 3 | 3.5 | C |
| 24300100 | Duck, cooked, NS as to skin eaten                                                    | 5000_MPE | 47 | 39 | 8  | 1 | 2   | D |
| 24300110 | Duck, cooked, skin eaten                                                             | 5000_MPE | 47 | 39 | 8  | 1 | 2   | D |
| 24301010 | Duck, roasted, skin eaten                                                            | 5000_MPE | 47 | 39 | 8  | 1 | 2   | D |
| 21540100 | Ground beef with textured vegetable protein, cooked                                  | 5000_MPE | 47 | 38 | 9  | 1 | 3.5 | D |
| 22708010 | Pork, pig's hocks, cooked                                                            | 5000_MPE | 47 | 37 | 10 | 1 | 3.5 | D |
| 24154210 | Chicken, thigh, fried, no coating, skin eaten, NS as to type of fat added in cooking | 5000_MPE | 47 | 37 | 10 | 1 | 2   | D |
| 24154213 | Chicken, thigh, fried, no coating, skin eaten, made with oil                         | 5000_MPE | 47 | 37 | 10 | 1 | 2   | D |
| 21001010 | Steak, NS as to type of meat, cooked, lean and fat eaten                             | 5000_MPE | 47 | 36 | 11 | 1 | 3.5 | D |
| 22101500 | Pork chop, stewed, NS as to fat eaten                                                | 5000_MPE | 47 | 36 | 11 | 1 | 3.5 | D |
| 22101510 | Pork chop, stewed, lean and fat eaten                                                | 5000_MPE | 47 | 36 | 11 | 1 | 3.5 | D |
| 24154214 | Chicken, thigh, fried, no coating, skin eaten, made with cooking spray               | 5000_MPE | 47 | 36 | 11 | 1 | 2   | D |
| 25160000 | Tongue, cooked                                                                       | 5000_MPE | 47 | 36 | 11 | 1 | 2   | D |
| 32105123 | Egg omelet or scrambled egg, with sausage, cheese, and mushrooms                     | 5000_MPE | 47 | 36 | 11 | 2 | 3   | D |
| 23204010 | Veal cutlet or steak, NS as to cooking method, NS as to fat eaten                    | 5000_MPE | 47 | 35 | 12 | 1 | 4   | C |
| 32105085 | Egg omelet or scrambled egg, with ham or bacon, cheese, and tomatoes                 | 5000_MPE | 47 | 35 | 12 | 2 | 2   | D |
| 23204020 | Veal cutlet or steak, NS as to cooking method, lean and fat eaten                    | 5000_MPE | 47 | 34 | 13 | 1 | 4   | C |
| 33301010 | Scrambled egg, made from packaged liquid mixture                                     | 5000_MPE | 46 | 48 | -2 | 4 | 3.5 | B |
| 32400100 | Egg white, omelet, scrambled, or fried, with cheese                                  | 5000_MPE | 46 | 43 | 3  | 2 | 3.5 | C |
| 32400600 | Egg white, omelet, scrambled, or fried, with meat and vegetables                     | 5000_MPE | 46 | 41 | 5  | 2 | 3.5 | B |
| 21420100 | Beef, sandwich steak, flaked, formed, thinly sliced                                  | 5000_MPE | 46 | 38 | 8  | 1 | 2   | D |
| 22201300 | Pork steak or cutlet, breaded or floured, broiled or baked, NS as to fat eaten       | 5000_MPE | 46 | 37 | 9  | 1 | 2   | D |
| 22201310 | Pork steak or cutlet, breaded or floured, broiled or baked, lean and fat eaten       | 5000_MPE | 46 | 37 | 9  | 1 | 2   | D |
| 24164010 | Chicken wing, grilled with sauce                                                     | 5000_MPE | 46 | 37 | 9  | 1 | 2   | D |
| 22301000 | Ham, fresh, cooked, NS as to fat eaten                                               | 5000_MPE | 46 | 36 | 10 | 1 | 2   | D |
| 22301110 | Ham, fresh, cooked, lean and fat eaten                                               | 5000_MPE | 46 | 36 | 10 | 1 | 2   | D |
| 23110000 | Lamb, ribs, cooked, lean only eaten                                                  | 5000_MPE | 46 | 36 | 10 | 1 | 3.5 | D |

|          |                                                                                                                              |          |    |    |    |   |     |   |
|----------|------------------------------------------------------------------------------------------------------------------------------|----------|----|----|----|---|-----|---|
| 32105161 | Egg omelet or scrambled egg, with chorizo and cheese                                                                         | 5000_MPE | 46 | 36 | 10 | 2 | 1.5 | D |
| 21410110 | Beef, stew meat, cooked, lean and fat eaten                                                                                  | 5000_MPE | 46 | 35 | 11 | 1 | 4   | C |
| 21417100 | Beef brisket, cooked, NS as to fat eaten                                                                                     | 5000_MPE | 46 | 35 | 11 | 1 | 4   | C |
| 21417120 | Beef brisket, cooked, lean only eaten                                                                                        | 5000_MPE | 46 | 35 | 11 | 1 | 4   | C |
| 22000200 | Pork, NS as to cut, fried, NS as to fat eaten                                                                                | 5000_MPE | 46 | 35 | 11 | 1 | 3.5 | D |
| 22000210 | Pork, NS as to cut, fried, lean and fat eaten                                                                                | 5000_MPE | 46 | 35 | 11 | 1 | 3.5 | D |
| 22101200 | Pork chop, fried, NS as to fat eaten                                                                                         | 5000_MPE | 46 | 35 | 11 | 1 | 3.5 | D |
| 22101210 | Pork chop, fried, lean and fat eaten                                                                                         | 5000_MPE | 46 | 35 | 11 | 1 | 3.5 | D |
| 23120120 | Lamb, roast, cooked, lean only eaten                                                                                         | 5000_MPE | 46 | 35 | 11 | 1 | 4   | C |
| 24154215 | Chicken, thigh, fried, no coating, skin eaten, made without fat                                                              | 5000_MPE | 46 | 35 | 11 | 1 | 2   | D |
| 24137211 | Chicken, leg (drumstick and thigh), coated, baked or fried, prepared with skin, skin/coating eaten, fat not added in cooking | 5000_MPE | 46 | 34 | 12 | 1 | 3.5 | D |
| 24164111 | Chicken, wing, fried, no coating, skin eaten, made with shortening                                                           | 5000_MPE | 46 | 34 | 12 | 1 | 3.5 | D |
| 32130240 | Egg omelet or scrambled egg, with meat, made with animal fat or meat drippings                                               | 5000_MPE | 46 | 32 | 14 | 2 | 3   | D |
| 33000100 | Egg substitute, NS as to powdered, frozen, or liquid                                                                         | 5000_MPE | 45 | 50 | -5 | 4 | 4   | A |
| 33201010 | Scrambled egg, made from cholesterol-free frozen mixture                                                                     | 5000_MPE | 45 | 48 | -3 | 4 | 3.5 | B |
| 24142321 | Chicken drumstick, baked or broiled, skin not eaten, from fast food / restaurant                                             | 5000_MPE | 45 | 44 | 1  | 4 | 4   | B |
| 21500200 | Ground beef or patty, breaded, cooked                                                                                        | 5000_MPE | 45 | 41 | 4  | 2 | 2   | D |
| 22002100 | Pork, ground or patty, breaded, cooked                                                                                       | 5000_MPE | 45 | 40 | 5  | 2 | 2   | D |
| 22000300 | Pork, NS as to cut, breaded or floured, fried, NS as to fat eaten                                                            | 5000_MPE | 45 | 39 | 6  | 2 | 3.5 | D |
| 22000320 | Pork, NS as to cut, breaded or floured, fried, lean only eaten                                                               | 5000_MPE | 45 | 39 | 6  | 2 | 3.5 | D |
| 22101320 | Pork chop, breaded or floured, fried, lean only eaten                                                                        | 5000_MPE | 45 | 39 | 6  | 2 | 3.5 | D |
| 22210450 | Pork, tenderloin, battered, fried                                                                                            | 5000_MPE | 45 | 37 | 8  | 2 | 4   | C |
| 24167200 | Chicken wing, fried, coated, from raw                                                                                        | 5000_MPE | 45 | 37 | 8  | 1 | 3.5 | D |
| 27146000 | Chicken or turkey with barbecue sauce, skin eaten                                                                            | 5000_MPE | 45 | 37 | 8  | 2 | 3.5 | D |
| 24147251 | Chicken, drumstick, coated, baked or fried, prepared skinless, coating eaten, made with shortening                           | 5000_MPE | 45 | 36 | 9  | 2 | 3.5 | D |
| 24157200 | Chicken, thigh, coated, baked or fried, prepared with skin, NS as to skin/coating eaten, fat added in cooking                | 5000_MPE | 45 | 36 | 9  | 1 | 2   | D |
| 24157210 | Chicken, thigh, coated, baked or fried, prepared with skin, skin/coating eaten, NS as to type of fat added in cooking        | 5000_MPE | 45 | 36 | 9  | 1 | 2   | D |
| 24157213 | Chicken, thigh, coated, baked or fried, prepared with skin, skin/coating eaten, made with oil                                | 5000_MPE | 45 | 36 | 9  | 1 | 2   | D |
| 23108000 | Lamb, shoulder, cooked, NS as to fat eaten                                                                                   | 5000_MPE | 45 | 35 | 10 | 1 | 2   | D |
| 23108010 | Lamb, shoulder, cooked, lean and fat eaten                                                                                   | 5000_MPE | 45 | 35 | 10 | 1 | 2   | D |
| 23107020 | Lamb, shoulder chop, cooked, lean only eaten                                                                                 | 5000_MPE | 45 | 34 | 11 | 1 | 3.5 | C |
| 24154211 | Chicken, thigh, fried, no coating, skin eaten, made with shortening                                                          | 5000_MPE | 45 | 34 | 11 | 1 | 2   | D |
| 21003000 | Beef, NS as to cut, fried, NS to fat eaten                                                                                   | 5000_MPE | 45 | 33 | 12 | 1 | 4   | C |
| 21102110 | Beef steak, fried, NS as to fat eaten                                                                                        | 5000_MPE | 45 | 33 | 12 | 1 | 4   | C |
| 21102130 | Beef steak, fried, lean only eaten                                                                                           | 5000_MPE | 45 | 33 | 12 | 1 | 4   | C |
| 21105110 | Beef steak, braised, NS as to fat eaten                                                                                      | 5000_MPE | 45 | 33 | 12 | 1 | 3.5 | D |

|          |                                                                                                  |          |    |    |    |   |     |   |
|----------|--------------------------------------------------------------------------------------------------|----------|----|----|----|---|-----|---|
| 21105120 | Beef steak, braised, lean and fat eaten                                                          | 5000_MPE | 45 | 33 | 12 | 1 | 3.5 | D |
| 21301000 | Beef, oxtails, cooked                                                                            | 5000_MPE | 45 | 33 | 12 | 1 | 3.5 | D |
| 21407000 | Beef, pot roast, braised or boiled, NS as to fat eaten                                           | 5000_MPE | 45 | 33 | 12 | 1 | 3.5 | D |
| 21407120 | Beef, pot roast, braised or boiled, lean only eaten                                              | 5000_MPE | 45 | 33 | 12 | 1 | 3.5 | D |
| 21410000 | Beef, stew meat, cooked, NS as to fat eaten                                                      | 5000_MPE | 45 | 33 | 12 | 1 | 3.5 | D |
| 21410120 | Beef, stew meat, cooked, lean only eaten                                                         | 5000_MPE | 45 | 33 | 12 | 1 | 3.5 | D |
| 21501300 | Ground beef, 85% - 89% lean, cooked (formerly extra lean)                                        | 5000_MPE | 45 | 33 | 12 | 1 | 3.5 | D |
| 21501350 | Ground beef, 90% - 94% lean, cooked                                                              | 5000_MPE | 45 | 33 | 12 | 1 | 3.5 | C |
| 23200100 | Veal, NS as to cut, cooked, NS as to fat eaten                                                   | 5000_MPE | 45 | 33 | 12 | 1 | 4   | D |
| 23200110 | Veal, NS as to cut, cooked, lean and fat eaten                                                   | 5000_MPE | 45 | 33 | 12 | 1 | 4   | D |
| 23210010 | Veal, roasted, NS as to fat eaten                                                                | 5000_MPE | 45 | 33 | 12 | 1 | 4   | D |
| 23210020 | Veal, roasted, lean and fat eaten                                                                | 5000_MPE | 45 | 33 | 12 | 1 | 4   | D |
| 21501360 | Ground beef, 95% or more lean, cooked                                                            | 5000_MPE | 45 | 32 | 13 | 1 | 4   | C |
| 22101520 | Pork chop, stewed, lean only eaten                                                               | 5000_MPE | 45 | 32 | 13 | 1 | 4   | C |
| 23205030 | Veal cutlet or steak, fried, lean only eaten                                                     | 5000_MPE | 45 | 32 | 13 | 1 | 4   | C |
| 24167115 | Chicken, wing, coated, baked or fried, prepared with skin, skin/coating eaten, made without fat  | 5000_MPE | 45 | 32 | 13 | 1 | 3.5 | D |
| 24164112 | Chicken, wing, fried, no coating, skin eaten, made with butter                                   | 5000_MPE | 45 | 31 | 14 | 1 | 2   | D |
| 24168022 | Chicken "wings", plain, from other sources                                                       | 5000_MPE | 44 | 39 | 5  | 3 | 2   | D |
| 22201420 | Pork steak or cutlet, breaded or floured, fried, lean only eaten                                 | 5000_MPE | 44 | 38 | 6  | 2 | 3.5 | D |
| 32105126 | Egg omelet or scrambled egg, with hot dog and cheese                                             | 5000_MPE | 44 | 34 | 10 | 2 | 2   | D |
| 21304000 | Beef, shortribs, cooked, NS as to fat eaten                                                      | 5000_MPE | 44 | 33 | 11 | 1 | 2   | D |
| 21304120 | Beef, shortribs, cooked, lean only eaten                                                         | 5000_MPE | 44 | 33 | 11 | 1 | 2   | D |
| 21305000 | Beef, cow head, cooked                                                                           | 5000_MPE | 44 | 33 | 11 | 1 | 2   | D |
| 21500310 | Ground beef patty, cooked                                                                        | 5000_MPE | 44 | 33 | 11 | 1 | 2   | D |
| 22002000 | Pork, ground or patty, cooked                                                                    | 5000_MPE | 44 | 33 | 11 | 1 | 2   | D |
| 22411000 | Pork roast, shoulder, cooked, NS as to fat eaten                                                 | 5000_MPE | 44 | 33 | 11 | 1 | 2   | D |
| 22411010 | Pork roast, shoulder, cooked, lean and fat eaten                                                 | 5000_MPE | 44 | 33 | 11 | 1 | 2   | D |
| 24127152 | Chicken, breast, coated, baked or fried, prepared skinless, coating eaten, made with butter      | 5000_MPE | 44 | 33 | 11 | 1 | 3.5 | D |
| 21501200 | Ground beef, 80% - 84% lean, cooked (formerly lean)                                              | 5000_MPE | 44 | 32 | 12 | 1 | 3.5 | D |
| 24157215 | Chicken, thigh, coated, baked or fried, prepared with skin, skin/coating eaten, made without fat | 5000_MPE | 44 | 32 | 12 | 1 | 3.5 | D |
| 32105120 | Egg omelet or scrambled egg, with sausage and mushrooms                                          | 5000_MPE | 44 | 32 | 12 | 2 | 3   | C |
| 32105122 | Egg omelet or scrambled egg, with sausage                                                        | 5000_MPE | 44 | 32 | 12 | 2 | 3   | C |
| 22000220 | Pork, NS as to cut, fried, lean only eaten                                                       | 5000_MPE | 44 | 31 | 13 | 1 | 4   | C |
| 22101220 | Pork chop, fried, lean only eaten                                                                | 5000_MPE | 44 | 31 | 13 | 1 | 4   | C |
| 23201030 | Veal chop, NS as to cooking method, lean only eaten                                              | 5000_MPE | 44 | 31 | 13 | 1 | 4   | C |
| 23203120 | Veal chop, broiled, lean only eaten                                                              | 5000_MPE | 44 | 31 | 13 | 1 | 4   | C |
| 23210030 | Veal, roasted, lean only eaten                                                                   | 5000_MPE | 44 | 31 | 13 | 1 | 4   | C |
| 23220010 | Veal, ground or patty, cooked                                                                    | 5000_MPE | 44 | 31 | 13 | 1 | 4   | C |



|          |                                                                                                                   |          |    |    |    |   |     |   |
|----------|-------------------------------------------------------------------------------------------------------------------|----------|----|----|----|---|-----|---|
| 23204200 | Veal cutlet or steak, broiled, NS as to fat eaten                                                                 | 5000_MPE | 44 | 30 | 14 | 1 | 4   | C |
| 23204210 | Veal cutlet or steak, broiled, lean and fat eaten                                                                 | 5000_MPE | 44 | 30 | 14 | 1 | 4   | C |
| 32130220 | Egg omelet or scrambled egg, with meat, made with butter                                                          | 5000_MPE | 44 | 30 | 14 | 2 | 3   | D |
| 24157331 | Chicken thigh, fried, coated, skin / coating not eaten, from restaurant                                           | 5000_MPE | 43 | 39 | 4  | 3 | 3.5 | D |
| 24204000 | Turkey, rolled roast, light or dark meat, cooked                                                                  | 5000_MPE | 43 | 39 | 4  | 4 | 3.5 | C |
| 32400700 | Egg white, omelet, scrambled, or fried, with cheese, meat, and vegetables                                         | 5000_MPE | 43 | 39 | 4  | 2 | 3.5 | C |
| 22000310 | Pork, NS as to cut, breaded or floured, fried, lean and fat eaten                                                 | 5000_MPE | 43 | 37 | 6  | 2 | 3.5 | D |
| 22101300 | Pork chop, breaded or floured, fried, NS as to fat eaten                                                          | 5000_MPE | 43 | 37 | 6  | 2 | 3.5 | D |
| 22101310 | Pork chop, breaded or floured, fried, lean and fat eaten                                                          | 5000_MPE | 43 | 37 | 6  | 2 | 3.5 | D |
| 21103110 | Beef steak, breaded or floured, baked or fried, NS as to fat eaten                                                | 5000_MPE | 43 | 36 | 7  | 2 | 3.5 | D |
| 21103130 | Beef steak, breaded or floured, baked or fried, lean only eaten                                                   | 5000_MPE | 43 | 36 | 7  | 2 | 3.5 | D |
| 14630200 | Cheese souffle                                                                                                    | 5000_MPE | 43 | 33 | 10 | 2 | 2   | D |
| 22701000 | Pork, spareribs, cooked, NS as to fat eaten                                                                       | 5000_MPE | 43 | 33 | 10 | 1 | 1.5 | E |
| 22701010 | Pork, spareribs, cooked, lean and fat eaten                                                                       | 5000_MPE | 43 | 33 | 10 | 1 | 1.5 | E |
| 23132000 | Lamb, ground or patty, cooked                                                                                     | 5000_MPE | 43 | 33 | 10 | 1 | 2   | D |
| 31108110 | Egg, white, cooked, no added fat                                                                                  | 5000_MPE | 43 | 33 | 10 | 1 | 4   | A |
| 20000200 | Ground meat, NFS                                                                                                  | 5000_MPE | 43 | 32 | 11 | 1 | 2   | D |
| 21302000 | Beef, neck bones, cooked                                                                                          | 5000_MPE | 43 | 32 | 11 | 1 | 2   | D |
| 21500100 | Ground beef, cooked                                                                                               | 5000_MPE | 43 | 32 | 11 | 1 | 2   | D |
| 21500110 | Ground beef, meatballs, meat only, cooked, NS as to percent lean (formerly NS as to regular, lean, or extra lean) | 5000_MPE | 43 | 32 | 11 | 1 | 2   | D |
| 23111010 | Lamb hocks, cooked                                                                                                | 5000_MPE | 43 | 32 | 11 | 1 | 3.5 | D |
| 23203030 | Veal chop, fried, lean only eaten                                                                                 | 5000_MPE | 43 | 32 | 11 | 1 | 4   | C |
| 32105121 | Egg omelet or scrambled egg, with sausage and cheese                                                              | 5000_MPE | 43 | 32 | 11 | 3 | 2   | D |
| 21102120 | Beef steak, fried, lean and fat eaten                                                                             | 5000_MPE | 43 | 31 | 12 | 1 | 3.5 | D |
| 21501000 | Ground beef, less than 80% lean, cooked (formerly regular)                                                        | 5000_MPE | 43 | 31 | 12 | 1 | 2   | D |
| 22201200 | Pork steak or cutlet, fried, NS as to fat eaten                                                                   | 5000_MPE | 43 | 31 | 12 | 1 | 3.5 | D |
| 22201210 | Pork steak or cutlet, fried, lean and fat eaten                                                                   | 5000_MPE | 43 | 31 | 12 | 1 | 3.5 | D |
| 24154212 | Chicken, thigh, fried, no coating, skin eaten, made with butter                                                   | 5000_MPE | 43 | 31 | 12 | 1 | 2   | D |
| 32105080 | Egg omelet or scrambled egg, with ham or bacon and cheese                                                         | 5000_MPE | 43 | 31 | 12 | 2 | 2   | D |
| 21105130 | Beef steak, braised, lean only eaten                                                                              | 5000_MPE | 43 | 30 | 13 | 1 | 4   | C |
| 21407110 | Beef, pot roast, braised or boiled, lean and fat eaten                                                            | 5000_MPE | 43 | 30 | 13 | 1 | 4   | C |
| 24122150 | Chicken breast, baked or broiled, skin eaten, from fast food / restaurant                                         | 5000_MPE | 42 | 42 | 0  | 4 | 4   | B |
| 24127211 | Chicken breast, fried, coated, skin / coating not eaten, from pre-cooked                                          | 5000_MPE | 42 | 42 | 0  | 4 | 4   | A |
| 33401600 | Egg substitute, omelet, scrambled, or fried, with cheese, meat, and vegetables                                    | 5000_MPE | 42 | 41 | 1  | 3 | 3.5 | C |
| 23220030 | Veal patty, breaded, cooked                                                                                       | 5000_MPE | 42 | 35 | 7  | 2 | 3.5 | D |
| 23000100 | Lamb, NS as to cut, cooked                                                                                        | 5000_MPE | 42 | 32 | 10 | 1 | 2   | D |

|          |                                                                                                      |          |    |    |    |   |     |   |
|----------|------------------------------------------------------------------------------------------------------|----------|----|----|----|---|-----|---|
| 23120100 | Lamb, roast, cooked, NS as to fat eaten                                                              | 5000_MPE | 42 | 32 | 10 | 1 | 2   | D |
| 23120110 | Lamb, roast, cooked, lean and fat eaten                                                              | 5000_MPE | 42 | 32 | 10 | 1 | 2   | D |
| 31109010 | Egg, white only, cooked, fat not added in cooking                                                    | 5000_MPE | 42 | 32 | 10 | 1 | 4   | A |
| 32400011 | Egg white omelet or scrambled egg, fat not added in cooking                                          | 5000_MPE | 42 | 32 | 10 | 1 | 4   | A |
| 21417110 | Beef brisket, cooked, lean and fat eaten                                                             | 5000_MPE | 42 | 31 | 11 | 1 | 2   | D |
| 24127112 | Chicken, breast, coated, baked or fried, prepared with skin, skin/coating eaten, made with butter    | 5000_MPE | 42 | 31 | 11 | 1 | 2   | D |
| 24198440 | Chicken skin                                                                                         | 5000_MPE | 42 | 31 | 11 | 1 | 1.5 | E |
| 24147252 | Chicken, drumstick, coated, baked or fried, prepared skinless, coating eaten, made with butter       | 5000_MPE | 42 | 30 | 12 | 1 | 3.5 | D |
| 25170310 | Hog maws, cooked                                                                                     | 5000_MPE | 42 | 28 | 14 | 1 | 2   | D |
| 33201110 | Scrambled egg, made from cholesterol-free frozen mixture with cheese                                 | 5000_MPE | 41 | 44 | -3 | 4 | 3.5 | C |
| 24122141 | Chicken breast, baked or broiled, skin not eaten, from pre-cooked                                    | 5000_MPE | 41 | 40 | 1  | 4 | 4.5 | A |
| 24152251 | Chicken thigh, baked or broiled, skin not eaten, from fast food / restaurant                         | 5000_MPE | 41 | 40 | 1  | 4 | 4   | C |
| 24142311 | Chicken drumstick, baked or broiled, skin not eaten, from pre-cooked                                 | 5000_MPE | 41 | 39 | 2  | 4 | 4   | B |
| 21103120 | Beef steak, breaded or floured, baked or fried, lean and fat eaten                                   | 5000_MPE | 41 | 34 | 7  | 2 | 3.5 | D |
| 22201410 | Pork steak or cutlet, breaded or floured, fried, lean and fat eaten                                  | 5000_MPE | 41 | 34 | 7  | 2 | 2   | D |
| 22704010 | Pork, cracklings, cooked                                                                             | 5000_MPE | 41 | 34 | 7  | 3 | 0.5 | E |
| 22201070 | Pork steak or cutlet, battered, fried, lean only eaten                                               | 5000_MPE | 41 | 33 | 8  | 2 | 3.5 | C |
| 23101000 | Lamb chop, NS as to cut, cooked, NS as to fat eaten                                                  | 5000_MPE | 41 | 32 | 9  | 1 | 1.5 | D |
| 23101010 | Lamb chop, NS as to cut, cooked, lean and fat eaten                                                  | 5000_MPE | 41 | 32 | 9  | 1 | 1.5 | D |
| 23104000 | Lamb, loin chop, cooked, NS as to fat eaten                                                          | 5000_MPE | 41 | 32 | 9  | 1 | 1.5 | D |
| 23104010 | Lamb, loin chop, cooked, lean and fat eaten                                                          | 5000_MPE | 41 | 32 | 9  | 1 | 1.5 | D |
| 23107000 | Lamb, shoulder chop, cooked, NS as to fat eaten                                                      | 5000_MPE | 41 | 31 | 10 | 1 | 2   | D |
| 23107010 | Lamb, shoulder chop, cooked, lean and fat eaten                                                      | 5000_MPE | 41 | 31 | 10 | 1 | 2   | D |
| 23203010 | Veal chop, fried, NS as to fat eaten                                                                 | 5000_MPE | 41 | 30 | 11 | 1 | 3.5 | C |
| 23203020 | Veal chop, fried, lean and fat eaten                                                                 | 5000_MPE | 41 | 30 | 11 | 1 | 3.5 | C |
| 23205010 | Veal cutlet or steak, fried, NS as to fat eaten                                                      | 5000_MPE | 41 | 30 | 11 | 1 | 3.5 | C |
| 23205020 | Veal cutlet or steak, fried, lean and fat eaten                                                      | 5000_MPE | 41 | 30 | 11 | 1 | 3.5 | C |
| 23201010 | Veal chop, NS as to cooking method, NS as to fat eaten                                               | 5000_MPE | 41 | 29 | 12 | 1 | 3.5 | D |
| 23201020 | Veal chop, NS as to cooking method, lean and fat eaten                                               | 5000_MPE | 41 | 29 | 12 | 1 | 3.5 | D |
| 23203100 | Veal chop, broiled, NS as to fat eaten                                                               | 5000_MPE | 41 | 29 | 12 | 1 | 3.5 | D |
| 23203110 | Veal chop, broiled, lean and fat eaten                                                               | 5000_MPE | 41 | 29 | 12 | 1 | 3.5 | D |
| 25160110 | Tongue, smoked, cured, or pickled, cooked                                                            | 5000_MPE | 41 | 29 | 12 | 1 | 1   | E |
| 33001000 | Egg substitute, omelet, scrambled, or fried, made with margarine                                     | 5000_MPE | 40 | 45 | -5 | 4 | 3.5 | C |
| 24198735 | Chicken nuggets, from school lunch                                                                   | 5000_MPE | 40 | 43 | -3 | 4 | 3.5 | D |
| 24198745 | Chicken tenders or strips, breaded, from school lunch                                                | 5000_MPE | 40 | 43 | -3 | 4 | 3.5 | D |
| 24157235 | Chicken, thigh, from fast food, coated, baked or broiled, prepared with skin, skin/coating not eaten | 5000_MPE | 40 | 38 | 2  | 4 | 3.5 | D |

|          |                                                                                                        |          |    |    |    |   |     |   |
|----------|--------------------------------------------------------------------------------------------------------|----------|----|----|----|---|-----|---|
| 24147311 | Chicken drumstick, fried, coated, skin / coating not eaten, from pre-cooked                            | 5000_MPE | 40 | 37 | 3  | 4 | 4   | B |
| 24168021 | Chicken "wings" with other sauces or seasoning, from other sources                                     | 5000_MPE | 40 | 33 | 7  | 2 | 1.5 | D |
| 22701050 | Pork, spareribs, barbecued, with sauce, lean only eaten                                                | 5000_MPE | 40 | 32 | 8  | 2 | 3.5 | D |
| 23311120 | Rabbit, NS as to domestic or wild, breaded, fried                                                      | 5000_MPE | 40 | 31 | 9  | 2 | 4   | C |
| 32105330 | Scrambled eggs with jerked beef, Puerto Rican style                                                    | 5000_MPE | 40 | 30 | 10 | 3 | 1   | E |
| 21104110 | Beef steak, battered, fried, NS as to fat eaten                                                        | 5000_MPE | 40 | 28 | 12 | 2 | 4   | C |
| 24147212 | Chicken, drumstick, coated, baked or fried, prepared with skin, skin/coating eaten, made with butter   | 5000_MPE | 40 | 28 | 12 | 1 | 2   | D |
| 24142320 | Chicken drumstick, baked or broiled, skin eaten, from fast food / restaurant                           | 5000_MPE | 39 | 38 | 1  | 4 | 3.5 | C |
| 24122140 | Chicken breast, baked or broiled, skin eaten, from pre-cooked                                          | 5000_MPE | 39 | 37 | 2  | 4 | 4   | A |
| 32400400 | Egg white, omelet, scrambled, or fried, with cheese and meat                                           | 5000_MPE | 39 | 34 | 5  | 2 | 3.5 | C |
| 22101420 | Pork chop, battered, fried, lean only eaten                                                            | 5000_MPE | 39 | 31 | 8  | 2 | 3.5 | C |
| 22201400 | Pork steak or cutlet, breaded or floured, fried, NS as to fat eaten                                    | 5000_MPE | 39 | 31 | 8  | 2 | 2   | D |
| 23110010 | Lamb, ribs, cooked, NS as to fat eaten                                                                 | 5000_MPE | 39 | 30 | 9  | 1 | 1.5 | D |
| 23110050 | Lamb, ribs, cooked, lean and fat eaten                                                                 | 5000_MPE | 39 | 30 | 9  | 1 | 1.5 | D |
| 23220020 | Mock chicken legs, cooked                                                                              | 5000_MPE | 39 | 29 | 10 | 2 | 3.5 | D |
| 24127221 | Chicken breast, fried, coated, skin / coating not eaten, from fast food / restaurant                   | 5000_MPE | 38 | 40 | -2 | 4 | 4   | B |
| 24147235 | Chicken, drumstick, from fast food, coated, baked or fried, prepared with skin, skin/coating not eaten | 5000_MPE | 38 | 36 | 2  | 4 | 4   | C |
| 22101400 | Pork chop, battered, fried, NS as to fat eaten                                                         | 5000_MPE | 38 | 30 | 8  | 2 | 3.5 | D |
| 22101410 | Pork chop, battered, fried, lean and fat eaten                                                         | 5000_MPE | 38 | 30 | 8  | 2 | 3.5 | D |
| 22201050 | Pork steak or cutlet, battered, fried, NS as to fat eaten                                              | 5000_MPE | 38 | 30 | 8  | 1 | 3   | D |
| 22201060 | Pork steak or cutlet, battered, fried, lean and fat eaten                                              | 5000_MPE | 38 | 30 | 8  | 1 | 3   | D |
| 21304220 | Beef, shortribs, barbecued, with sauce, lean only eaten                                                | 5000_MPE | 38 | 28 | 10 | 2 | 2   | D |
| 22701030 | Pork, spareribs, barbecued, with sauce, NS as to fat eaten                                             | 5000_MPE | 38 | 28 | 10 | 1 | 1.5 | E |
| 22701040 | Pork, spareribs, barbecued, with sauce, lean and fat eaten                                             | 5000_MPE | 38 | 28 | 10 | 1 | 1.5 | E |
| 24198840 | Fried chicken chunks, Puerto Rican style                                                               | 5000_MPE | 38 | 27 | 11 | 1 | 2   | D |
| 32400080 | Egg white omelet, scrambled, or fried, no added fat                                                    | 5000_MPE | 38 | 27 | 11 | 1 | 4   | A |
| 21104130 | Beef steak, battered, fried, lean only eaten                                                           | 5000_MPE | 38 | 26 | 12 | 2 | 3.5 | C |
| 24198710 | Chicken patty with cheese, breaded, cooked                                                             | 5000_MPE | 37 | 39 | -2 | 4 | 2   | D |
| 24157311 | Chicken thigh, fried, coated, skin / coating not eaten, from pre-cooked                                | 5000_MPE | 37 | 36 | 1  | 4 | 4   | B |
| 33401300 | Egg substitute, omelet, scrambled, or fried, with cheese and meat                                      | 5000_MPE | 37 | 36 | 1  | 3 | 3   | C |
| 24107071 | Chicken, NS as to part, fried, coated, skin / coating not eaten                                        | 5000_MPE | 37 | 35 | 2  | 4 | 4   | B |
| 24127135 | Chicken, breast, from fast food, coated, baked or fried, prepared with skin, skin/coating not eaten    | 5000_MPE | 37 | 35 | 2  | 4 | 4   | B |
| 24152241 | Chicken thigh, baked or broiled, skin not eaten, from pre-cooked                                       | 5000_MPE | 37 | 35 | 2  | 4 | 4   | B |
| 24142310 | Chicken drumstick, baked or broiled, skin eaten, from pre-cooked                                       | 5000_MPE | 37 | 34 | 3  | 4 | 4   | B |
| 24168020 | Chicken "wings" with hot sauce, from other sources                                                     | 5000_MPE | 37 | 30 | 7  | 2 | 1.5 | E |
| 21304110 | Beef, shortribs, cooked, lean and fat eaten                                                            | 5000_MPE | 37 | 27 | 10 | 1 | 1   | E |

|          |                                                                                                               |          |    |    |    |   |     |   |
|----------|---------------------------------------------------------------------------------------------------------------|----------|----|----|----|---|-----|---|
| 21104120 | Beef steak, battered, fried, lean and fat eaten                                                               | 5000_MPE | 37 | 25 | 12 | 2 | 3.5 | D |
| 32105030 | Egg omelet or scrambled egg, with ham or bacon                                                                | 5000_MPE | 37 | 23 | 14 | 2 | 3   | D |
| 24198677 | Chicken fillet, breaded                                                                                       | 5000_MPE | 36 | 39 | -3 | 4 | 3.5 | C |
| 24198700 | Chicken patty, fillet, or tenders, breaded, cooked                                                            | 5000_MPE | 36 | 39 | -3 | 4 | 3.5 | C |
| 24198746 | Chicken tenders or strips, breaded, from frozen                                                               | 5000_MPE | 36 | 39 | -3 | 4 | 3.5 | C |
| 24198742 | Chicken tenders or strips, breaded, from restaurant                                                           | 5000_MPE | 36 | 37 | -1 | 4 | 2   | D |
| 33001050 | Egg substitute, omelet, scrambled, or fried, no added fat                                                     | 5000_MPE | 36 | 37 | -1 | 4 | 4   | A |
| 33102010 | Scrambled egg, made from powdered mixture                                                                     | 5000_MPE | 36 | 37 | -1 | 4 | 3.5 | C |
| 33202010 | Scrambled egg, made from frozen mixture                                                                       | 5000_MPE | 36 | 33 | 3  | 4 | 3.5 | B |
| 33401010 | Egg substitute, omelet, scrambled, or fried, with cheese, fat not added in cooking                            | 5000_MPE | 36 | 33 | 3  | 3 | 3   | D |
| 32400110 | Egg white, omelet, scrambled, or fried, with cheese, fat not added in cooking                                 | 5000_MPE | 36 | 28 | 8  | 2 | 3.5 | C |
| 24198747 | Chicken tenders or strips, breaded, from other sources                                                        | 5000_MPE | 35 | 38 | -3 | 4 | 3.5 | D |
| 24198671 | Chicken patty, breaded                                                                                        | 5000_MPE | 35 | 37 | -2 | 4 | 3   | D |
| 24198690 | Chicken patty, fillet, or tenders, breaded, cooked, from fast food / restaurant                               | 5000_MPE | 35 | 37 | -2 | 4 | 2   | D |
| 24198739 | Chicken tenders or strips, NFS                                                                                | 5000_MPE | 35 | 37 | -2 | 4 | 2   | D |
| 24198741 | Chicken tenders or strips, breaded, from fast food                                                            | 5000_MPE | 35 | 37 | -2 | 4 | 2   | D |
| 33001040 | Egg substitute, omelet, scrambled, or fried, made with cooking spray                                          | 5000_MPE | 35 | 36 | -1 | 4 | 3.5 | B |
| 33001110 | Egg substitute, cheese flavored, omelet, scrambled, or fried, fat not added in cooking                        | 5000_MPE | 35 | 36 | -1 | 4 | 3.5 | B |
| 33001210 | Egg substitute, vegetable flavored, omelet, scrambled, or fried, fat not added in cooking                     | 5000_MPE | 35 | 36 | -1 | 4 | 3.5 | B |
| 33401520 | Egg substitute, omelet, scrambled, or fried, with meat and vegetables, NS as to fat added in cooking          | 5000_MPE | 35 | 32 | 3  | 3 | 3   | D |
| 32400620 | Egg white, omelet, scrambled, or fried, with meat and vegetables, NS as to fat added in cooking               | 5000_MPE | 35 | 29 | 6  | 3 | 3   | D |
| 21304200 | Beef, shortribs, barbecued, with sauce, NS as to fat eaten                                                    | 5000_MPE | 35 | 25 | 10 | 1 | 1   | E |
| 21304210 | Beef, shortribs, barbecued, with sauce, lean and fat eaten                                                    | 5000_MPE | 35 | 25 | 10 | 1 | 1   | E |
| 22706010 | Pork, neck bones, cooked                                                                                      | 5000_MPE | 35 | 23 | 12 | 2 | 3.5 | D |
| 24127210 | Chicken breast, fried, coated, skin / coating eaten, from pre-cooked                                          | 5000_MPE | 34 | 35 | -1 | 4 | 4   | B |
| 24147321 | Chicken drumstick, fried, coated, skin / coating not eaten, from fast food / restaurant                       | 5000_MPE | 34 | 34 | 0  | 4 | 3.5 | C |
| 24152250 | Chicken thigh, baked or broiled, skin eaten, from fast food / restaurant                                      | 5000_MPE | 34 | 33 | 1  | 4 | 3.5 | D |
| 24167135 | Chicken, wing, from fast food, coated, baked or fried, prepared with skin, skin/coating not eaten             | 5000_MPE | 34 | 32 | 2  | 4 | 3.5 | D |
| 33401100 | Egg substitute, omelet, scrambled, or fried, with meat                                                        | 5000_MPE | 34 | 31 | 3  | 3 | 3.5 | C |
| 33401620 | Egg substitute, omelet, scrambled, or fried, with cheese, meat, and vegetables, NS as to fat added in cooking | 5000_MPE | 34 | 31 | 3  | 3 | 3   | D |
| 22709110 | Pork skin, boiled                                                                                             | 5000_MPE | 34 | 24 | 10 | 1 | 0.5 | E |
| 32105160 | Egg omelet or scrambled egg, with chorizo                                                                     | 5000_MPE | 34 | 22 | 12 | 3 | 1.5 | D |
| 25170210 | Chitterlings, cooked                                                                                          | 5000_MPE | 34 | 18 | 16 | 1 | 2   | D |

|          |                                                                                                             |          |    |    |    |   |     |   |
|----------|-------------------------------------------------------------------------------------------------------------|----------|----|----|----|---|-----|---|
| 24198729 | Chicken nuggets, NFS                                                                                        | 5000_MPE | 33 | 35 | -2 | 4 | 3   | D |
| 24198730 | Chicken nuggets, from fast food / restaurant                                                                | 5000_MPE | 33 | 35 | -2 | 4 | 3   | D |
| 24198731 | Chicken nuggets, from fast food                                                                             | 5000_MPE | 33 | 35 | -2 | 4 | 3   | D |
| 24198732 | Chicken nuggets, from restaurant                                                                            | 5000_MPE | 33 | 35 | -2 | 4 | 3   | D |
| 24152240 | Chicken thigh, baked or broiled, skin eaten, from pre-cooked                                                | 5000_MPE | 33 | 31 | 2  | 4 | 4   | B |
| 32400720 | Egg white, omelet, scrambled, or fried, with cheese, meat, and vegetables, NS as to fat added in cooking    | 5000_MPE | 33 | 27 | 6  | 3 | 3   | D |
| 32400200 | Egg white, omelet, scrambled, or fried, with meat                                                           | 5000_MPE | 33 | 26 | 7  | 2 | 3.5 | C |
| 24107080 | Chicken, NS as to part, baked, coated, skin / coating eaten                                                 | 5000_MPE | 32 | 32 | 0  | 4 | 2   | D |
| 24157321 | Chicken thigh, fried, coated, skin / coating not eaten, from fast food                                      | 5000_MPE | 32 | 32 | 0  | 4 | 3.5 | D |
| 24162150 | Chicken wing, baked or broiled, from fast food / restaurant                                                 | 5000_MPE | 32 | 30 | 2  | 4 | 2   | D |
| 33001020 | Egg substitute, omelet, scrambled, or fried, made with butter                                               | 5000_MPE | 32 | 26 | 6  | 3 | 3   | D |
| 24198737 | Chicken nuggets, from other sources                                                                         | 5000_MPE | 31 | 33 | -2 | 4 | 3   | D |
| 32105190 | Egg casserole with bread, cheese, milk and meat                                                             | 5000_MPE | 31 | 21 | 10 | 3 | 3   | C |
| 24147310 | Chicken drumstick, fried, coated, skin / coating eaten, from pre-cooked                                     | 5000_MPE | 30 | 31 | -1 | 4 | 3.5 | D |
| 24162140 | Chicken wing, baked or broiled, from pre-cooked                                                             | 5000_MPE | 30 | 27 | 3  | 4 | 2   | D |
| 24157330 | Chicken thigh, fried, coated, skin / coating eaten, from restaurant                                         | 5000_MPE | 30 | 26 | 4  | 3 | 2   | D |
| 22709010 | Pork skin rinds                                                                                             | 5000_MPE | 30 | 21 | 9  | 3 | 0.5 | E |
| 22501010 | Canadian bacon, cooked                                                                                      | 5000_MPE | 30 | 18 | 12 | 3 | 2   | D |
| 23345100 | Wild pig, smoked                                                                                            | 5000_MPE | 30 | 15 | 15 | 1 | 3.5 | D |
| 24168012 | Chicken "wings", plain, from precooked                                                                      | 5000_MPE | 29 | 30 | -1 | 4 | 3   | D |
| 24147225 | Chicken, drumstick, from fast food, coated, baked or fried, prepared with skin, NS as to skin/coating eaten | 5000_MPE | 29 | 28 | 1  | 4 | 2   | D |
| 24147230 | Chicken, drumstick, from fast food, coated, baked or fried, prepared with skin, skin/coating eaten          | 5000_MPE | 29 | 28 | 1  | 4 | 2   | D |
| 24167230 | Chicken wing, fried, coated, from restaurant                                                                | 5000_MPE | 29 | 26 | 3  | 4 | 1.5 | D |
| 32400070 | Egg white omelet, scrambled, or fried, made with butter                                                     | 5000_MPE | 29 | 20 | 9  | 1 | 3.5 | C |
| 21601010 | Beef, bacon, reduced sodium, cooked                                                                         | 5000_MPE | 29 | 19 | 10 | 3 | 0.5 | E |
| 24208500 | Turkey bacon, cooked                                                                                        | 5000_MPE | 29 | 19 | 10 | 3 | 0.5 | E |
| 32101500 | Egg, Benedict                                                                                               | 5000_MPE | 29 | 18 | 11 | 2 | 1.5 | E |
| 32105125 | Egg omelet or scrambled egg, with hot dogs                                                                  | 5000_MPE | 29 | 16 | 13 | 3 | 2   | D |
| 22707010 | Pork, pig's feet, cooked                                                                                    | 5000_MPE | 29 | 14 | 15 | 1 | 3.5 | C |
| 24127220 | Chicken breast, fried, coated, skin / coating eaten, from fast food / restaurant                            | 5000_MPE | 28 | 29 | -1 | 4 | 3   | D |
| 24157310 | Chicken thigh, fried, coated, skin / coating eaten, from pre-cooked                                         | 5000_MPE | 28 | 28 | 0  | 4 | 3   | D |
| 24127125 | Chicken, breast, from fast food, coated, baked or fried, prepared with skin, NS as to skin/coating eaten    | 5000_MPE | 28 | 26 | 2  | 4 | 3.5 | D |
| 24127130 | Chicken, breast, from fast food, coated, baked or fried, prepared with skin, skin/coating eaten             | 5000_MPE | 28 | 26 | 2  | 4 | 3.5 | D |
| 27146050 | Chicken wing with hot pepper sauce                                                                          | 5000_MPE | 28 | 26 | 2  | 4 | 1.5 | E |
| 32400420 | Egg white, omelet, scrambled, or fried, with cheese and meat, NS as to fat added in cooking                 | 5000_MPE | 28 | 20 | 8  | 3 | 2   | D |

|          |                                                                                                     |          |    |    |    |   |     |   |
|----------|-----------------------------------------------------------------------------------------------------|----------|----|----|----|---|-----|---|
| 22300140 | Ham, fried, lean only eaten                                                                         | 5000_MPE | 28 | 19 | 9  | 3 | 1.5 | E |
| 22600210 | Pork bacon, NS as to fresh, smoked or cured, reduced sodium, cooked                                 | 5000_MPE | 28 | 19 | 9  | 3 | 0.5 | E |
| 22602010 | Pork bacon, smoked or cured, reduced sodium, cooked                                                 | 5000_MPE | 28 | 19 | 9  | 3 | 0.5 | E |
| 32400220 | Egg white, omelet, scrambled, or fried, with meat, NS as to fat added in cooking                    | 5000_MPE | 28 | 19 | 9  | 3 | 2   | D |
| 22311210 | Ham, smoked or cured, low sodium, cooked, lean and fat eaten                                        | 5000_MPE | 28 | 18 | 10 | 3 | 2   | D |
| 23321050 | Venison/deer, cured                                                                                 | 5000_MPE | 28 | 11 | 17 | 1 | 1.5 | D |
| 24168031 | Chicken "wings", boneless, with hot sauce, from other sources                                       | 5000_MPE | 27 | 27 | 0  | 4 | 2   | D |
| 24107070 | Chicken, NS as to part, fried, coated, skin / coating eaten                                         | 5000_MPE | 27 | 25 | 2  | 4 | 2   | D |
| 22300120 | Ham, fried, NS as to fat eaten                                                                      | 5000_MPE | 27 | 18 | 9  | 3 | 1.5 | D |
| 22300130 | Ham, fried, lean and fat eaten                                                                      | 5000_MPE | 27 | 18 | 9  | 3 | 1.5 | D |
| 22311200 | Ham, smoked or cured, low sodium, cooked, NS as to fat eaten                                        | 5000_MPE | 27 | 17 | 10 | 3 | 2   | D |
| 32400710 | Egg white, omelet, scrambled, or fried, with cheese, meat, and vegetables, fat not added in cooking | 5000_MPE | 27 | 17 | 10 | 3 | 3.5 | D |
| 22107020 | Pork chop, smoked or cured, cooked, lean only eaten                                                 | 5000_MPE | 27 | 16 | 11 | 3 | 1.5 | E |
| 24201520 | Turkey, light or dark meat, smoked, skin not eaten                                                  | 5000_MPE | 27 | 12 | 15 | 3 | 2   | D |
| 24202120 | Turkey, drumstick, smoked, skin eaten                                                               | 5000_MPE | 27 | 12 | 15 | 3 | 1.5 | D |
| 24168002 | Chicken "wings", plain, from fast food / restaurant                                                 | 5000_MPE | 26 | 27 | -1 | 4 | 1.5 | D |
| 24198736 | Chicken nuggets, from frozen                                                                        | 5000_MPE | 26 | 27 | -1 | 4 | 3   | D |
| 24198740 | Chicken nuggets                                                                                     | 5000_MPE | 26 | 27 | -1 | 4 | 3   | D |
| 24147320 | Chicken drumstick, fried, coated, skin / coating eaten, from fast food / restaurant                 | 5000_MPE | 26 | 26 | 0  | 4 | 2   | D |
| 22300170 | Ham, breaded or floured, fried, lean only eaten                                                     | 5000_MPE | 26 | 18 | 8  | 3 | 1.5 | D |
| 22600100 | Bacon, NS as to type of meat, cooked                                                                | 5000_MPE | 26 | 16 | 10 | 3 | 0.5 | E |
| 22600200 | Pork bacon, NS as to fresh, smoked or cured, cooked                                                 | 5000_MPE | 26 | 16 | 10 | 3 | 0.5 | E |
| 22601000 | Pork bacon, smoked or cured, cooked                                                                 | 5000_MPE | 26 | 16 | 10 | 3 | 0.5 | E |
| 22601040 | Bacon or side pork, fresh, cooked                                                                   | 5000_MPE | 26 | 16 | 10 | 3 | 0.5 | E |
| 89901000 | Bacon, for use with vegetables                                                                      | 5000_MPE | 26 | 16 | 10 | 3 | 0.5 | E |
| 89902100 | Bacon, for use on a sandwich                                                                        | 5000_MPE | 26 | 16 | 10 | 3 | 0.5 | E |
| 22421000 | Pork roast, smoked or cured, cooked, NS as to fat eaten                                             | 5000_MPE | 26 | 15 | 11 | 3 | 1.5 | E |
| 22421010 | Pork roast, smoked or cured, cooked, lean and fat eaten                                             | 5000_MPE | 26 | 15 | 11 | 3 | 1.5 | E |
| 22601020 | Pork bacon, smoked or cured, cooked, lean only eaten                                                | 5000_MPE | 26 | 15 | 11 | 3 | 1   | E |
| 32400610 | Egg white, omelet, scrambled, or fried, with meat and vegetables, fat not added in cooking          | 5000_MPE | 26 | 15 | 11 | 3 | 3.5 | C |
| 22311450 | Ham, prosciutto                                                                                     | 5000_MPE | 26 | 14 | 12 | 3 | 0.5 | E |
| 22421020 | Pork roast, smoked or cured, cooked, lean only eaten                                                | 5000_MPE | 26 | 14 | 12 | 3 | 1.5 | D |
| 24201500 | Turkey, light or dark meat, smoked, cooked, NS as to skin eaten                                     | 5000_MPE | 26 | 12 | 14 | 3 | 2   | D |
| 24201510 | Turkey, light or dark meat, smoked, skin eaten                                                      | 5000_MPE | 26 | 12 | 14 | 3 | 2   | D |
| 25240110 | Chicken salad spread                                                                                | 5000_MPE | 25 | 24 | 1  | 4 | 3   | D |
| 24168011 | Chicken "wings" with other sauces or seasoning, from precooked                                      | 5000_MPE | 25 | 23 | 2  | 4 | 2   | D |

|          |                                                                                                          |          |    |    |    |   |     |   |
|----------|----------------------------------------------------------------------------------------------------------|----------|----|----|----|---|-----|---|
| 33401510 | Egg substitute, omelet, scrambled, or fried, with meat and vegetables, fat not added in cooking          | 5000_MPE | 25 | 21 | 4  | 4 | 3.5 | C |
| 33401320 | Egg substitute, omelet, scrambled, or fried, with cheese and meat, NS as to fat added in cooking         | 5000_MPE | 25 | 20 | 5  | 3 | 2   | D |
| 22300150 | Ham, breaded or floured, fried, NS as to fat eaten                                                       | 5000_MPE | 25 | 17 | 8  | 3 | 2   | D |
| 22300160 | Ham, breaded or floured, fried, lean and fat eaten                                                       | 5000_MPE | 25 | 17 | 8  | 3 | 2   | D |
| 22311220 | Ham, smoked or cured, low sodium, cooked, lean only eaten                                                | 5000_MPE | 25 | 13 | 12 | 3 | 3.5 | D |
| 24203120 | Turkey, wing, smoked, skin eaten                                                                         | 5000_MPE | 25 | 11 | 14 | 3 | 1.5 | D |
| 24167210 | Chicken wing, fried, coated, from pre-cooked                                                             | 5000_MPE | 24 | 24 | 0  | 4 | 3   | D |
| 33401120 | Egg substitute, omelet, scrambled, or fried, with meat, NS as to fat added in cooking                    | 5000_MPE | 24 | 19 | 5  | 3 | 2   | D |
| 24168030 | Chicken "wings", boneless, with hot sauce, from fast food / restaurant                                   | 5000_MPE | 23 | 24 | -1 | 4 | 1.5 | D |
| 24168001 | Chicken "wings" with other sauces or seasoning, from fast food / restaurant                              | 5000_MPE | 23 | 23 | 0  | 4 | 1.5 | D |
| 25221855 | Turkey or chicken sausage, reduced sodium                                                                | 5000_MPE | 23 | 21 | 2  | 4 | 4   | B |
| 25221875 | Turkey or chicken, pork, and beef sausage, reduced sodium                                                | 5000_MPE | 23 | 21 | 2  | 4 | 3.5 | C |
| 25220108 | Beef sausage, reduced sodium                                                                             | 5000_MPE | 22 | 21 | 1  | 4 | 3.5 | C |
| 25221408 | Pork sausage, reduced sodium                                                                             | 5000_MPE | 22 | 21 | 1  | 4 | 3.5 | C |
| 33401610 | Egg substitute, omelet, scrambled, or fried, with cheese, meat, and vegetables, fat not added in cooking | 5000_MPE | 22 | 17 | 5  | 4 | 3   | D |
| 22311000 | Ham, smoked or cured, cooked, NS as to fat eaten                                                         | 5000_MPE | 22 | 13 | 9  | 3 | 1.5 | E |
| 22311010 | Ham, smoked or cured, cooked, lean and fat eaten                                                         | 5000_MPE | 22 | 13 | 9  | 3 | 1.5 | E |
| 22605010 | Pork bacon, formed, lean meat added, cooked                                                              | 5000_MPE | 22 | 13 | 9  | 3 | 0.5 | E |
| 32400410 | Egg white, omelet, scrambled, or fried, with cheese and meat, fat not added in cooking                   | 5000_MPE | 22 | 13 | 9  | 3 | 2   | D |
| 22107000 | Pork chop, smoked or cured, cooked, NS as to fat eaten                                                   | 5000_MPE | 22 | 12 | 10 | 3 | 1   | E |
| 22107010 | Pork chop, smoked or cured, cooked, lean and fat eaten                                                   | 5000_MPE | 22 | 12 | 10 | 3 | 1   | E |
| 22311520 | Ham, smoked or cured, canned, lean only eaten                                                            | 5000_MPE | 22 | 12 | 10 | 3 | 2   | D |
| 21601000 | Beef, bacon, cooked                                                                                      | 5000_MPE | 22 | 11 | 11 | 3 | 0.5 | E |
| 21601250 | Beef, bacon, cooked, lean only eaten                                                                     | 5000_MPE | 22 | 9  | 13 | 3 | 1.5 | E |
| 24157320 | Chicken thigh, fried, coated, skin / coating eaten, from fast food                                       | 5000_MPE | 21 | 21 | 0  | 4 | 2   | D |
| 24167220 | Chicken wing, fried, coated, from fast food                                                              | 5000_MPE | 21 | 21 | 0  | 4 | 1.5 | D |
| 24157225 | Chicken, thigh, from fast food, coated, baked or fried, prepared with skin, NS as to skin/coating eaten  | 5000_MPE | 21 | 19 | 2  | 4 | 2   | D |
| 24157230 | Chicken, thigh, from fast food, coated, baked or fried, prepared with skin, skin/coating eaten           | 5000_MPE | 21 | 19 | 2  | 4 | 2   | D |
| 24167125 | Chicken, wing, from fast food, coated, baked or fried, prepared with skin, NS as to skin/coating eaten   | 5000_MPE | 21 | 19 | 2  | 4 | 1.5 | D |
| 24167130 | Chicken, wing, from fast food, coated, baked or fried, prepared with skin, skin/coating eaten            | 5000_MPE | 21 | 19 | 2  | 4 | 1.5 | D |
| 22311020 | Ham, smoked or cured, cooked, lean only eaten                                                            | 5000_MPE | 21 | 11 | 10 | 3 | 1.5 | D |
| 89901002 | Ham, for use with vegetables                                                                             | 5000_MPE | 21 | 9  | 12 | 3 | 2   | D |
| 21500300 | Ground beef patty, cooked (for fast food sandwiches)                                                     | 5000_MPE | 20 | 17 | 3  | 4 | 2   | D |
| 22311500 | Ham, smoked or cured, canned, NS as to fat eaten                                                         | 5000_MPE | 20 | 10 | 10 | 3 | 2   | D |

|          |                                                                                             |          |    |    |    |   |     |   |
|----------|---------------------------------------------------------------------------------------------|----------|----|----|----|---|-----|---|
| 22311510 | Ham, smoked or cured, canned, lean and fat eaten                                            | 5000_MPE | 20 | 10 | 10 | 3 | 2   | D |
| 32400210 | Egg white, omelet, scrambled, or fried, with meat, fat not added in cooking                 | 5000_MPE | 20 | 10 | 10 | 3 | 2   | D |
| 24168010 | Chicken "wings" with hot sauce, from precooked                                              | 5000_MPE | 19 | 19 | 0  | 4 | 1.5 | D |
| 21601500 | Beef, bacon, formed, lean meat added, cooked                                                | 5000_MPE | 19 | 8  | 11 | 3 | 0.5 | E |
| 21002000 | Beef, pickled                                                                               | 5000_MPE | 19 | 6  | 13 | 3 | 1.5 | E |
| 21416000 | Corned beef, cooked, NS as to fat eaten                                                     | 5000_MPE | 19 | 6  | 13 | 3 | 1.5 | E |
| 21416110 | Corned beef, cooked, lean and fat eaten                                                     | 5000_MPE | 19 | 6  | 13 | 3 | 1.5 | E |
| 24168000 | Chicken "wings" with hot sauce, from fast food / restaurant                                 | 5000_MPE | 18 | 18 | 0  | 4 | 1.5 | E |
| 25230560 | Liverwurst                                                                                  | 5000_MPE | 18 | 14 | 4  | 4 | 1   | E |
| 33401310 | Egg substitute, omelet, scrambled, or fried, with cheese and meat, fat not added in cooking | 5000_MPE | 18 | 12 | 6  | 4 | 2   | D |
| 24208510 | Turkey bacon, reduced sodium, cooked                                                        | 5000_MPE | 18 | 9  | 9  | 3 | 1.5 | E |
| 22621000 | Salt pork, cooked                                                                           | 5000_MPE | 17 | 7  | 10 | 3 | 0.5 | E |
| 21602010 | Beef, dried, chipped, cooked in fat                                                         | 5000_MPE | 17 | 4  | 13 | 3 | 0.5 | E |
| 25230430 | Ham and cheese loaf                                                                         | 5000_MPE | 15 | 13 | 2  | 4 | 1.5 | E |
| 25221830 | Turkey or chicken sausage                                                                   | 5000_MPE | 15 | 10 | 5  | 4 | 3.5 | D |
| 21416120 | Corned beef, cooked, lean only eaten                                                        | 5000_MPE | 15 | 3  | 12 | 3 | 1.5 | E |
| 21416150 | Corned beef, canned, ready-to-eat                                                           | 5000_MPE | 15 | 3  | 12 | 3 | 1.5 | E |
| 23321900 | Venison/deer jerky                                                                          | 5000_MPE | 15 | 1  | 14 | 1 | 0.5 | E |
| 25221860 | Turkey or chicken sausage, reduced fat                                                      | 5000_MPE | 14 | 9  | 5  | 4 | 3.5 | D |
| 25220010 | Cold cut, NFS                                                                               | 5000_MPE | 14 | 8  | 6  | 4 | 2   | D |
| 25220510 | Capicola                                                                                    | 5000_MPE | 14 | 8  | 6  | 4 | 2   | D |
| 25230230 | Ham, sliced, extra lean, prepackaged or deli, luncheon meat                                 | 5000_MPE | 14 | 8  | 6  | 4 | 2   | D |
| 25230520 | Ham, luncheon meat, chopped, minced, pressed, spiced, lowfat, not canned                    | 5000_MPE | 14 | 8  | 6  | 4 | 2   | D |
| 25231120 | Beef, prepackaged or deli, luncheon meat, reduced sodium                                    | 5000_MPE | 14 | 8  | 6  | 4 | 3.5 | C |
| 21603000 | Beef, pastrami (beef, smoked, spiced)                                                       | 5000_MPE | 14 | 1  | 13 | 3 | 2   | D |
| 25220106 | Beef sausage, reduced fat                                                                   | 5000_MPE | 13 | 8  | 5  | 4 | 1.5 | D |
| 33401110 | Egg substitute, omelet, scrambled, or fried, with meat, fat not added in cooking            | 5000_MPE | 13 | 8  | 5  | 4 | 3   | D |
| 25230220 | Ham, prepackaged or deli, luncheon meat, reduced sodium                                     | 5000_MPE | 13 | 7  | 6  | 4 | 3.5 | D |
| 25221220 | Pastrami, made from any kind of meat, reduced fat                                           | 5000_MPE | 13 | 6  | 7  | 4 | 3.5 | D |
| 25231110 | Beef, prepackaged or deli, luncheon meat                                                    | 5000_MPE | 13 | 6  | 7  | 4 | 3.5 | D |
| 25221406 | Pork sausage, reduced fat                                                                   | 5000_MPE | 12 | 8  | 4  | 4 | 1.5 | D |
| 25221450 | Pork sausage rice links                                                                     | 5000_MPE | 12 | 8  | 4  | 4 | 1.5 | D |
| 25221505 | Salami, made from any type of meat, reduced fat                                             | 5000_MPE | 12 | 6  | 6  | 4 | 1.5 | D |
| 25230110 | Luncheon meat, NFS                                                                          | 5000_MPE | 12 | 6  | 6  | 4 | 2   | D |
| 25230210 | Ham, prepackaged or deli, luncheon meat                                                     | 5000_MPE | 12 | 6  | 6  | 4 | 2   | D |
| 21602000 | Beef, dried, chipped, uncooked                                                              | 5000_MPE | 12 | 1  | 11 | 3 | 0.5 | E |
| 25221405 | Pork sausage                                                                                | 5000_MPE | 11 | 7  | 4  | 4 | 1   | E |



|          |                                                                                                               |          |    |   |   |   |     |   |
|----------|---------------------------------------------------------------------------------------------------------------|----------|----|---|---|---|-----|---|
| 25230310 | Chicken or turkey loaf, prepackaged or deli, luncheon meat                                                    | 5000_MPE | 11 | 5 | 6 | 4 | 3   | D |
| 25230900 | Turkey or chicken breast, prepackaged or deli, luncheon meat                                                  | 5000_MPE | 11 | 5 | 6 | 4 | 3   | D |
| 25220710 | Chorizo                                                                                                       | 5000_MPE | 10 | 5 | 5 | 4 | 1   | E |
| 25230840 | Turkey salami                                                                                                 | 5000_MPE | 10 | 4 | 6 | 4 | 1.5 | D |
| 25230785 | Turkey, prepackaged or deli, luncheon meat, reduced sodium                                                    | 5000_MPE | 10 | 3 | 7 | 4 | 3.5 | C |
| 25240310 | Roast beef spread                                                                                             | 5000_MPE | 9  | 7 | 2 | 4 | 1.5 | E |
| 25220360 | Bratwurst, with cheese                                                                                        | 5000_MPE | 9  | 5 | 4 | 4 | 1   | E |
| 25221870 | Turkey or chicken and pork sausage                                                                            | 5000_MPE | 9  | 4 | 5 | 4 | 1.5 | E |
| 25221850 | Turkey sausage, smoked                                                                                        | 5000_MPE | 9  | 2 | 7 | 4 | 2   | D |
| 22431000 | Pork roll, cured, fried                                                                                       | 5000_MPE | 9  | 1 | 8 | 3 | 0.5 | E |
| 25230420 | Ham luncheon meat, loaf type                                                                                  | 5000_MPE | 9  | 1 | 8 | 4 | 2   | D |
| 25230780 | Turkey, prepackaged or deli, luncheon meat                                                                    | 5000_MPE | 9  | 1 | 8 | 4 | 3.5 | D |
| 21602100 | Beef jerky                                                                                                    | 5000_MPE | 8  | 4 | 4 | 4 | 0.5 | E |
| 22002800 | Pork jerky                                                                                                    | 5000_MPE | 8  | 4 | 4 | 4 | 0.5 | E |
| 25220310 | Bockwurst                                                                                                     | 5000_MPE | 8  | 3 | 5 | 4 | 2   | D |
| 25220350 | Bratwurst                                                                                                     | 5000_MPE | 8  | 3 | 5 | 4 | 1   | E |
| 25230790 | Turkey ham, sliced, extra lean, prepackaged or deli, luncheon meat                                            | 5000_MPE | 8  | 1 | 7 | 4 | 2   | D |
| 25230800 | Turkey ham, prepackaged or deli, luncheon meat                                                                | 5000_MPE | 8  | 1 | 7 | 4 | 2   | D |
| 25220120 | Beef sausage, smoked, stick                                                                                   | 5000_MPE | 6  | 1 | 5 | 4 | 0.5 | E |
| 25221400 | Sausage, NFS                                                                                                  | 5000_MPE | 6  | 1 | 5 | 4 | 1   | E |
| 25221515 | Salami, made from any type of meat, reduced sodium                                                            | 5000_MPE | 6  | 1 | 5 | 4 | 0.5 | E |
| 25221350 | Italian sausage                                                                                               | 5000_MPE | 5  | 2 | 3 | 4 | 1   | E |
| 25240220 | Ham salad spread                                                                                              | 5000_MPE | 5  | 2 | 3 | 4 | 1.5 | E |
| 22321110 | Ham, smoked or cured, ground patty                                                                            | 5000_MPE | 5  | 1 | 4 | 4 | 1   | E |
| 25221410 | Pork sausage, fresh, bulk, patty or link, cooked                                                              | 5000_MPE | 5  | 1 | 4 | 4 | 1   | E |
| 25221430 | Pork sausage, country style, fresh, cooked                                                                    | 5000_MPE | 5  | 1 | 4 | 4 | 1   | E |
| 25221840 | Turkey breakfast sausage, bulk, patty or link, cooked                                                         | 5000_MPE | 5  | 1 | 4 | 4 | 3   | D |
| 25230540 | Ham, pork and chicken, canned luncheon meat, chopped, minced, pressed, spiced, reduced fat and reduced sodium | 5000_MPE | 5  | 1 | 4 | 4 | 1   | E |
| 25230550 | Ham, pork, and chicken, canned luncheon meat, chopped, minced, pressed, spiced, reduced sodium                | 5000_MPE | 5  | 1 | 4 | 4 | 1   | E |
| 25230610 | Luncheon meat, loaf type                                                                                      | 5000_MPE | 5  | 1 | 4 | 4 | 1.5 | E |
| 25210170 | Frankfurter or hot dog, chili-filled                                                                          | 5000_MPE | 4  | 1 | 3 | 4 | 1   | E |
| 25220420 | Bologna, Lebanon                                                                                              | 5000_MPE | 4  | 1 | 3 | 4 | 1.5 | E |
| 25220650 | Turkey or chicken and beef sausage                                                                            | 5000_MPE | 4  | 1 | 3 | 4 | 1.5 | E |
| 25221255 | Pepperoni, reduced fat                                                                                        | 5000_MPE | 4  | 1 | 3 | 4 | 0.5 | E |
| 25221500 | Salami, NFS                                                                                                   | 5000_MPE | 4  | 1 | 3 | 4 | 0.5 | E |
| 25221520 | Salami, dry or hard                                                                                           | 5000_MPE | 4  | 1 | 3 | 4 | 0.5 | E |
| 25221610 | Scrapple, cooked                                                                                              | 5000_MPE | 4  | 1 | 3 | 4 | 3   | D |
| 25221920 | Vienna sausage, chicken, canned                                                                               | 5000_MPE | 4  | 1 | 3 | 4 | 2   | D |

|          |                                                                        |          |   |   |   |   |     |   |
|----------|------------------------------------------------------------------------|----------|---|---|---|---|-----|---|
| 25230340 | Chicken, prepackaged or deli, luncheon meat, reduced sodium            | 5000_MPE | 4 | 1 | 3 | 4 | 3.5 | C |
| 25210290 | Frankfurter or hot dog, meat and poultry, reduced fat or light         | 5000_MPE | 3 | 1 | 2 | 4 | 3   | D |
| 25210310 | Frankfurter or hot dog, chicken                                        | 5000_MPE | 3 | 1 | 2 | 4 | 1.5 | D |
| 25210410 | Frankfurter or hot dog, turkey                                         | 5000_MPE | 3 | 1 | 2 | 4 | 1.5 | D |
| 25210620 | Frankfurter or hot dog, beef, reduced fat or light                     | 5000_MPE | 3 | 1 | 2 | 4 | 3   | D |
| 25210700 | Frankfurter or hot dog, meat & poultry, lowfat                         | 5000_MPE | 3 | 1 | 2 | 4 | 3   | D |
| 25220460 | Bologna, pork                                                          | 5000_MPE | 3 | 1 | 2 | 4 | 1.5 | E |
| 25221510 | Salami, soft, cooked                                                   | 5000_MPE | 3 | 1 | 2 | 4 | 0.5 | E |
| 25221950 | Pickled sausage                                                        | 5000_MPE | 3 | 1 | 2 | 4 | 1   | E |
| 25230320 | Chicken, prepackaged or deli, luncheon meat                            | 5000_MPE | 3 | 1 | 2 | 4 | 3   | D |
| 25230510 | Ham, luncheon meat, chopped, minced, pressed, spiced, not canned       | 5000_MPE | 3 | 1 | 2 | 4 | 1.5 | E |
| 25230710 | Sandwich loaf, luncheon meat                                           | 5000_MPE | 3 | 1 | 2 | 4 | 2   | D |
| 25230820 | Turkey pastrami                                                        | 5000_MPE | 3 | 1 | 2 | 4 | 2   | D |
| 25230905 | Turkey or chicken breast, low salt, prepackaged or deli, luncheon meat | 5000_MPE | 3 | 1 | 2 | 4 | 3.5 | D |
| 22001000 | Pork, pickled, NS as to cut                                            | 5000_MPE | 2 | 1 | 1 | 3 | 2   | D |
| 22707020 | Pork, pig's feet, pickled                                              | 5000_MPE | 2 | 1 | 1 | 3 | 2   | D |
| 25210150 | Frankfurter or hot dog, cheese-filled                                  | 5000_MPE | 2 | 1 | 1 | 4 | 1   | E |
| 25210250 | Frankfurter or hot dog, meat and poultry, fat free                     | 5000_MPE | 2 | 1 | 1 | 4 | 3   | D |
| 25220140 | Beef sausage, fresh, bulk, patty or link, cooked                       | 5000_MPE | 2 | 1 | 1 | 4 | 1   | E |
| 25220490 | Bologna, with cheese                                                   | 5000_MPE | 2 | 1 | 1 | 4 | 1   | E |
| 25221420 | Pork sausage, brown and serve, cooked                                  | 5000_MPE | 2 | 1 | 1 | 4 | 1   | E |
| 23322100 | Deer sausage                                                           | 5000_MPE | 1 | 1 | 0 | 4 | 1   | E |
| 25210110 | Frankfurter or hot dog, NFS                                            | 5000_MPE | 1 | 1 | 0 | 4 | 1   | E |
| 25210210 | Frankfurter or hot dog, beef                                           | 5000_MPE | 1 | 1 | 0 | 4 | 1   | E |
| 25210220 | Frankfurter or hot dog, beef and pork                                  | 5000_MPE | 1 | 1 | 0 | 4 | 1.5 | E |
| 25210230 | Frankfurter or hot dog, beef and pork, lowfat                          | 5000_MPE | 1 | 1 | 0 | 4 | 1.5 | E |
| 25210240 | Frankfurter or hot dog, beef and pork, reduced fat or light            | 5000_MPE | 1 | 1 | 0 | 4 | 1.5 | E |
| 25210280 | Frankfurter or hot dog, meat and poultry                               | 5000_MPE | 1 | 1 | 0 | 4 | 1.5 | E |
| 25210510 | Frankfurter or hot dog, low salt                                       | 5000_MPE | 1 | 1 | 0 | 4 | 1.5 | D |
| 25210610 | Frankfurter or hot dog, beef, lowfat                                   | 5000_MPE | 1 | 1 | 0 | 4 | 1   | E |
| 25220100 | Beef sausage, NFS                                                      | 5000_MPE | 1 | 1 | 0 | 4 | 1   | E |
| 25220105 | Beef sausage                                                           | 5000_MPE | 1 | 1 | 0 | 4 | 1   | E |
| 25220110 | Beef sausage, brown and serve, links, cooked                           | 5000_MPE | 1 | 1 | 0 | 4 | 0.5 | E |
| 25220130 | Beef sausage, smoked                                                   | 5000_MPE | 1 | 1 | 0 | 4 | 1   | E |
| 25220150 | Beef sausage with cheese                                               | 5000_MPE | 1 | 1 | 0 | 4 | 0.5 | E |
| 25220210 | Blood sausage                                                          | 5000_MPE | 1 | 1 | 0 | 4 | 1   | E |
| 25220390 | Bologna, beef, lowfat                                                  | 5000_MPE | 1 | 1 | 0 | 4 | 1.5 | D |
| 25220400 | Bologna, pork and beef                                                 | 5000_MPE | 1 | 1 | 0 | 4 | 1   | E |

|          |                                                                           |          |   |   |   |   |     |   |
|----------|---------------------------------------------------------------------------|----------|---|---|---|---|-----|---|
| 25220410 | Bologna, NFS                                                              | 5000_MPE | 1 | 1 | 0 | 4 | 0.5 | E |
| 25220425 | Bologna, made from any kind of meat, reduced fat                          | 5000_MPE | 1 | 1 | 0 | 4 | 1.5 | D |
| 25220430 | Bologna, beef                                                             | 5000_MPE | 1 | 1 | 0 | 4 | 1   | E |
| 25220435 | Bologna, made from any kind of meat, reduced sodium                       | 5000_MPE | 1 | 1 | 0 | 4 | 1   | E |
| 25220440 | Bologna, turkey                                                           | 5000_MPE | 1 | 1 | 0 | 4 | 1.5 | E |
| 25220445 | Bologna, made from any kind of meat, reduced fat and reduced sodium       | 5000_MPE | 1 | 1 | 0 | 4 | 1.5 | D |
| 25220450 | Bologna ring, smoked                                                      | 5000_MPE | 1 | 1 | 0 | 4 | 1   | E |
| 25220470 | Bologna, beef, lower sodium                                               | 5000_MPE | 1 | 1 | 0 | 4 | 1   | E |
| 25220480 | Bologna, chicken, beef, and pork                                          | 5000_MPE | 1 | 1 | 0 | 4 | 1   | E |
| 25220500 | Bologna, beef and pork, lowfat                                            | 5000_MPE | 1 | 1 | 0 | 4 | 1   | E |
| 25220610 | Cervelat, soft                                                            | 5000_MPE | 1 | 1 | 0 | 4 | 0.5 | E |
| 25220910 | Head cheese                                                               | 5000_MPE | 1 | 1 | 0 | 4 | 2   | D |
| 25221110 | Knockwurst                                                                | 5000_MPE | 1 | 1 | 0 | 4 | 1   | E |
| 25221210 | Mortadella                                                                | 5000_MPE | 1 | 1 | 0 | 4 | 0.5 | E |
| 25221215 | Pastrami, NFS                                                             | 5000_MPE | 1 | 1 | 0 | 4 | 2   | D |
| 25221250 | Pepperoni, NFS                                                            | 5000_MPE | 1 | 1 | 0 | 4 | 0.5 | E |
| 25221260 | Pepperoni, reduced sodium                                                 | 5000_MPE | 1 | 1 | 0 | 4 | 0.5 | E |
| 25221310 | Polish sausage                                                            | 5000_MPE | 1 | 1 | 0 | 4 | 1   | E |
| 25221460 | Pork and beef sausage                                                     | 5000_MPE | 1 | 1 | 0 | 4 | 1   | E |
| 25221470 | Pork and beef sausage, brown and serve, cooked                            | 5000_MPE | 1 | 1 | 0 | 4 | 1   | E |
| 25221480 | Mettwurst                                                                 | 5000_MPE | 1 | 1 | 0 | 4 | 1   | E |
| 25221530 | Salami, beef                                                              | 5000_MPE | 1 | 1 | 0 | 4 | 1   | E |
| 25221650 | Smoked link sausage, pork                                                 | 5000_MPE | 1 | 1 | 0 | 4 | 1   | E |
| 25221660 | Smoked link sausage, pork and beef                                        | 5000_MPE | 1 | 1 | 0 | 4 | 1   | E |
| 25221680 | Smoked sausage, pork                                                      | 5000_MPE | 1 | 1 | 0 | 4 | 1   | E |
| 25221710 | Souse                                                                     | 5000_MPE | 1 | 1 | 0 | 4 | 3   | D |
| 25221810 | Thuringer                                                                 | 5000_MPE | 1 | 1 | 0 | 4 | 0.5 | E |
| 25221880 | Turkey or chicken, pork, and beef sausage, reduced fat                    | 5000_MPE | 1 | 1 | 0 | 4 | 1.5 | E |
| 25221890 | Turkey, pork, and beef sausage, lowfat, smoked                            | 5000_MPE | 1 | 1 | 0 | 4 | 3   | C |
| 25221910 | Vienna sausage, canned                                                    | 5000_MPE | 1 | 1 | 0 | 4 | 1.5 | E |
| 25230235 | Ham, sliced, extra lean, lower sodium, prepackaged or deli, luncheon meat | 5000_MPE | 1 | 1 | 0 | 4 | 2   | D |
| 25230410 | Ham loaf, luncheon meat                                                   | 5000_MPE | 1 | 1 | 0 | 4 | 0.5 | E |
| 25230450 | Honey loaf                                                                | 5000_MPE | 1 | 1 | 0 | 4 | 3.5 | D |
| 25230530 | Ham and pork, canned luncheon meat, chopped, minced, pressed, spiced      | 5000_MPE | 1 | 1 | 0 | 4 | 0.5 | E |
| 25230810 | Veal loaf                                                                 | 5000_MPE | 1 | 1 | 0 | 4 | 0.5 | E |
| 25231150 | Corned beef, pressed                                                      | 5000_MPE | 1 | 1 | 0 | 4 | 1.5 | E |
| 25240000 | Meat spread or potted meat, NFS                                           | 5000_MPE | 1 | 1 | 0 | 4 | 1.5 | E |
| 25240210 | Ham, deviled or potted                                                    | 5000_MPE | 1 | 1 | 0 | 4 | 0.5 | E |

|          |                                                      |              |     |     |    |   |     |   |
|----------|------------------------------------------------------|--------------|-----|-----|----|---|-----|---|
| 25240320 | Corned beef spread                                   | 5000_MPE     | 1   | 1   | 0  | 4 | 1.5 | E |
| 26118020 | Halibut, baked or broiled, made with oil             | 5800_Seafood | 100 | 100 | 0  | 1 | 4   | A |
| 26153100 | Tuna, fresh, raw                                     | 5800_Seafood | 100 | 100 | 0  | 1 | 4.5 | A |
| 26321110 | Snails, cooked, NS as to cooking method              | 5800_Seafood | 100 | 100 | 0  | 1 | 4   | A |
| 26137100 | Salmon, raw                                          | 5800_Seafood | 100 | 97  | 3  | 1 | 4.5 | A |
| 26100100 | Fish, NS as to type, raw                             | 5800_Seafood | 100 | 96  | 4  | 1 | 4.5 | A |
| 26117110 | Haddock, cooked, NS as to cooking method             | 5800_Seafood | 100 | 96  | 4  | 1 | 4   | A |
| 26117120 | Haddock, baked or broiled, fat added                 | 5800_Seafood | 100 | 96  | 4  | 1 | 4   | A |
| 26309160 | Crayfish, boiled or steamed                          | 5800_Seafood | 100 | 96  | 4  | 1 | 4   | A |
| 26315100 | Oysters, raw                                         | 5800_Seafood | 100 | 96  | 4  | 1 | 4   | A |
| 26153110 | Tuna, fresh, cooked, NS as to cooking method         | 5800_Seafood | 100 | 95  | 5  | 1 | 4   | A |
| 26153120 | Tuna, fresh, baked or broiled, fat added             | 5800_Seafood | 100 | 95  | 5  | 1 | 4   | A |
| 26315180 | Oysters, canned                                      | 5800_Seafood | 100 | 95  | 5  | 3 | 4   | A |
| 26118024 | Halibut, baked or broiled, made with cooking spray   | 5800_Seafood | 100 | 94  | 6  | 1 | 4   | A |
| 27150230 | Shrimp scampi                                        | 5800_Seafood | 100 | 93  | 7  | 1 | 4   | A |
| 26305120 | Crab, baked or broiled, fat added                    | 5800_Seafood | 100 | 92  | 8  | 1 | 3.5 | C |
| 26118023 | Halibut, baked or broiled, no added fat              | 5800_Seafood | 100 | 91  | 9  | 1 | 4   | A |
| 26118050 | Halibut, steamed or poached                          | 5800_Seafood | 100 | 91  | 9  | 1 | 4   | A |
| 26213100 | Squid, raw                                           | 5800_Seafood | 100 | 90  | 10 | 1 | 4.5 | A |
| 26137110 | Salmon, cooked, NS as to cooking method              | 5800_Seafood | 99  | 92  | 7  | 1 | 4   | B |
| 26137120 | Salmon, baked or broiled, made with oil              | 5800_Seafood | 99  | 92  | 7  | 1 | 4   | B |
| 26319120 | Shrimp, baked or broiled, made with oil              | 5800_Seafood | 99  | 90  | 9  | 1 | 4   | A |
| 26137170 | Salmon, dried                                        | 5800_Seafood | 98  | 93  | 5  | 3 | 4.5 | B |
| 26109120 | Cod, baked or broiled, made with oil                 | 5800_Seafood | 98  | 91  | 7  | 1 | 4   | A |
| 26121100 | Mackerel, raw                                        | 5800_Seafood | 98  | 91  | 7  | 1 | 4   | A |
| 26129120 | Pike, baked or broiled, fat added                    | 5800_Seafood | 98  | 91  | 7  | 1 | 4   | A |
| 26109110 | Cod, cooked, NS as to cooking method                 | 5800_Seafood | 98  | 90  | 8  | 1 | 4   | A |
| 26311120 | Lobster, baked or broiled, fat added                 | 5800_Seafood | 98  | 90  | 8  | 1 | 3.5 | D |
| 26127120 | Perch, baked or broiled, made with oil               | 5800_Seafood | 98  | 89  | 9  | 1 | 4   | A |
| 26207110 | Roe, shad, cooked                                    | 5800_Seafood | 98  | 88  | 10 | 1 | 4   | B |
| 26100120 | Fish, NS as to type, baked or broiled, made with oil | 5800_Seafood | 97  | 91  | 6  | 1 | 4   | B |
| 26100110 | Fish, NS as to type, cooked, NS as to cooking method | 5800_Seafood | 97  | 90  | 7  | 1 | 4   | B |
| 26319124 | Shrimp, baked or broiled, made with cooking spray    | 5800_Seafood | 97  | 87  | 10 | 1 | 4   | A |
| 26215120 | Turtle, cooked, NS as to cooking method              | 5800_Seafood | 96  | 91  | 5  | 1 | 4   | A |
| 26147110 | Sturgeon, cooked, NS as to cooking method            | 5800_Seafood | 96  | 90  | 6  | 1 | 4   | A |
| 26153170 | Tuna, fresh, dried                                   | 5800_Seafood | 96  | 90  | 6  | 3 | 4.5 | A |
| 26119100 | Herring, raw                                         | 5800_Seafood | 96  | 88  | 8  | 1 | 4   | A |
| 26137124 | Salmon, baked or broiled, made with cooking spray    | 5800_Seafood | 96  | 88  | 8  | 1 | 4   | B |
| 26319122 | Shrimp, baked or broiled, made with margarine        | 5800_Seafood | 96  | 86  | 10 | 2 | 4   | A |

|          |                                                            |              |    |    |    |   |     |   |
|----------|------------------------------------------------------------|--------------|----|----|----|---|-----|---|
| 26139180 | Sardines, canned in oil                                    | 5800_Seafood | 95 | 91 | 4  | 3 | 4   | A |
| 26139110 | Sardines, cooked                                           | 5800_Seafood | 95 | 90 | 5  | 3 | 4   | A |
| 26115120 | Flounder, baked or broiled, made with oil                  | 5800_Seafood | 95 | 88 | 7  | 1 | 4   | B |
| 26137122 | Salmon, baked or broiled, made with margarine              | 5800_Seafood | 95 | 87 | 8  | 1 | 4   | B |
| 26141110 | Sea bass, cooked, NS as to cooking method                  | 5800_Seafood | 95 | 87 | 8  | 1 | 4   | A |
| 26141120 | Sea bass, baked or broiled, fat added                      | 5800_Seafood | 95 | 87 | 8  | 1 | 4   | A |
| 26100160 | Fish, NS as to type, steamed                               | 5800_Seafood | 95 | 86 | 9  | 1 | 4   | A |
| 26137123 | Salmon, baked or broiled, no added fat                     | 5800_Seafood | 95 | 86 | 9  | 1 | 4   | A |
| 26137160 | Salmon, steamed or poached                                 | 5800_Seafood | 95 | 86 | 9  | 1 | 4   | A |
| 26157120 | Whiting, baked or broiled, made with oil                   | 5800_Seafood | 95 | 86 | 9  | 1 | 4   | A |
| 26213120 | Squid, baked or broiled, fat added                         | 5800_Seafood | 95 | 86 | 9  | 1 | 4   | A |
| 26313100 | Mussels, raw                                               | 5800_Seafood | 95 | 86 | 9  | 1 | 4   | A |
| 26100123 | Fish, NS as to type, baked or broiled, no added fat        | 5800_Seafood | 95 | 85 | 10 | 1 | 4   | A |
| 26115124 | Flounder, baked or broiled, made with cooking spray        | 5800_Seafood | 95 | 85 | 10 | 1 | 4   | A |
| 26319123 | Shrimp, baked or broiled, no added fat                     | 5800_Seafood | 95 | 83 | 12 | 1 | 4   | A |
| 26319130 | Shrimp, steamed or boiled                                  | 5800_Seafood | 95 | 83 | 12 | 1 | 4   | A |
| 26149110 | Swordfish, cooked, NS as to cooking method                 | 5800_Seafood | 94 | 87 | 7  | 1 | 4   | B |
| 26149120 | Swordfish, baked or broiled, fat added                     | 5800_Seafood | 94 | 87 | 7  | 1 | 4   | B |
| 26158000 | Tilapia, cooked, NS as to cooking method                   | 5800_Seafood | 94 | 87 | 7  | 1 | 4   | A |
| 26158010 | Tilapia, baked or broiled, made with oil                   | 5800_Seafood | 94 | 87 | 7  | 1 | 4   | A |
| 26100122 | Fish, NS as to type, baked or broiled, made with margarine | 5800_Seafood | 94 | 86 | 8  | 1 | 4   | A |
| 26125110 | Ocean perch, cooked, NS as to cooking method               | 5800_Seafood | 94 | 86 | 8  | 1 | 4   | A |
| 26125120 | Ocean perch, baked or broiled, fat added                   | 5800_Seafood | 94 | 86 | 8  | 1 | 4   | A |
| 26133120 | Porgy, baked or broiled, fat added                         | 5800_Seafood | 94 | 86 | 8  | 1 | 4   | A |
| 26133110 | Porgy, cooked, NS as to cooking method                     | 5800_Seafood | 94 | 85 | 9  | 1 | 4   | A |
| 26115123 | Flounder, baked or broiled, no added fat                   | 5800_Seafood | 94 | 83 | 11 | 1 | 4   | A |
| 26157124 | Whiting, baked or broiled, made with cooking spray         | 5800_Seafood | 94 | 83 | 11 | 1 | 4   | A |
| 26109122 | Cod, baked or broiled, made with margarine                 | 5800_Seafood | 93 | 85 | 8  | 2 | 4   | A |
| 26151110 | Trout, cooked, NS as to cooking method                     | 5800_Seafood | 93 | 85 | 8  | 1 | 4   | B |
| 26151120 | Trout, baked or broiled, made with oil                     | 5800_Seafood | 93 | 85 | 8  | 1 | 4   | B |
| 26111110 | Croaker, cooked, NS as to cooking method                   | 5800_Seafood | 93 | 84 | 9  | 1 | 4   | A |
| 26111120 | Croaker, baked or broiled, fat added                       | 5800_Seafood | 93 | 84 | 9  | 1 | 4   | A |
| 26149121 | Swordfish, baked or broiled, no added fat                  | 5800_Seafood | 93 | 83 | 10 | 1 | 4   | B |
| 26315120 | Oysters, baked or broiled, fat added                       | 5800_Seafood | 92 | 86 | 6  | 1 | 3.5 | C |
| 26137180 | Salmon, canned                                             | 5800_Seafood | 92 | 85 | 7  | 3 | 4   | A |
| 26115122 | Flounder, baked or broiled, made with margarine            | 5800_Seafood | 92 | 83 | 9  | 2 | 4   | B |
| 26149160 | Swordfish, steamed or poached                              | 5800_Seafood | 92 | 82 | 10 | 1 | 4   | B |
| 26151123 | Trout, baked or broiled, no added fat                      | 5800_Seafood | 92 | 82 | 10 | 1 | 4   | A |
| 26315121 | Oysters, baked or broiled, no added fat                    | 5800_Seafood | 92 | 82 | 10 | 1 | 3.5 | C |

|          |                                                    |              |    |    |    |   |     |   |
|----------|----------------------------------------------------|--------------|----|----|----|---|-----|---|
| 26117121 | Haddock, baked or broiled, no added fat            | 5800_Seafood | 92 | 81 | 11 | 1 | 4   | A |
| 26133121 | Porgy, baked or broiled, no added fat              | 5800_Seafood | 92 | 81 | 11 | 1 | 4   | A |
| 26115160 | Flounder, steamed or poached                       | 5800_Seafood | 92 | 80 | 12 | 1 | 4   | A |
| 26305110 | Crab, cooked, NS as to cooking method              | 5800_Seafood | 92 | 79 | 13 | 1 | 3.5 | B |
| 26305160 | Crab, hard shell, steamed                          | 5800_Seafood | 92 | 79 | 13 | 1 | 3.5 | B |
| 26105120 | Carp, baked or broiled, fat added                  | 5800_Seafood | 91 | 84 | 7  | 1 | 4   | A |
| 26109180 | Cod, dried, salted, salt removed in water          | 5800_Seafood | 91 | 83 | 8  | 3 | 4.5 | A |
| 26121110 | Mackerel, cooked, NS as to cooking method          | 5800_Seafood | 91 | 83 | 8  | 1 | 3.5 | D |
| 26121120 | Mackerel, baked or broiled, fat added              | 5800_Seafood | 91 | 83 | 8  | 1 | 3.5 | D |
| 26151122 | Trout, baked or broiled, made with margarine       | 5800_Seafood | 91 | 82 | 9  | 1 | 4   | B |
| 26158012 | Tilapia, baked or broiled, made with margarine     | 5800_Seafood | 91 | 82 | 9  | 1 | 4   | A |
| 26141121 | Sea bass, baked or broiled, no added fat           | 5800_Seafood | 91 | 81 | 10 | 1 | 4   | A |
| 26153122 | Tuna, fresh, baked or broiled, no added fat        | 5800_Seafood | 91 | 81 | 10 | 1 | 4.5 | A |
| 26157122 | Whiting, baked or broiled, made with margarine     | 5800_Seafood | 91 | 81 | 10 | 1 | 4   | A |
| 26158014 | Tilapia, baked or broiled, made with cooking spray | 5800_Seafood | 91 | 81 | 10 | 1 | 4   | A |
| 26115190 | Flounder, smoked                                   | 5800_Seafood | 91 | 80 | 11 | 1 | 4.5 | A |
| 26157123 | Whiting, baked or broiled, no added fat            | 5800_Seafood | 91 | 80 | 11 | 1 | 4   | A |
| 26117160 | Haddock, steamed or poached                        | 5800_Seafood | 91 | 79 | 12 | 1 | 4   | A |
| 26125121 | Ocean perch, baked or broiled, no added fat        | 5800_Seafood | 91 | 79 | 12 | 1 | 4   | A |
| 26157160 | Whiting, steamed or poached                        | 5800_Seafood | 91 | 79 | 12 | 1 | 4   | A |
| 26139170 | Sardines, dried                                    | 5800_Seafood | 90 | 84 | 6  | 3 | 4   | D |
| 26105160 | Carp, steamed or poached                           | 5800_Seafood | 90 | 81 | 9  | 1 | 4   | A |
| 26121121 | Mackerel, baked or broiled, no added fat           | 5800_Seafood | 90 | 81 | 9  | 1 | 4   | C |
| 26131100 | Pompano, raw                                       | 5800_Seafood | 90 | 81 | 9  | 1 | 4   | A |
| 26141160 | Sea bass, steamed or poached                       | 5800_Seafood | 90 | 80 | 10 | 1 | 4   | A |
| 26151160 | Trout, steamed or poached                          | 5800_Seafood | 90 | 80 | 10 | 1 | 4   | A |
| 26153160 | Tuna, fresh, steamed or poached                    | 5800_Seafood | 90 | 80 | 10 | 1 | 4.5 | A |
| 26125160 | Ocean perch, steamed or poached                    | 5800_Seafood | 90 | 79 | 11 | 1 | 4   | A |
| 26133160 | Porgy, steamed or poached                          | 5800_Seafood | 90 | 79 | 11 | 1 | 4   | A |
| 26158013 | Tilapia, baked or broiled, no added fat            | 5800_Seafood | 90 | 79 | 11 | 1 | 4   | A |
| 26315130 | Oysters, steamed                                   | 5800_Seafood | 90 | 79 | 11 | 1 | 3.5 | C |
| 26111121 | Croaker, baked or broiled, no added fat            | 5800_Seafood | 90 | 78 | 12 | 1 | 4   | A |
| 26100190 | Fish, NS as to type, smoked                        | 5800_Seafood | 89 | 84 | 5  | 3 | 3.5 | B |
| 26137190 | Salmon, smoked                                     | 5800_Seafood | 89 | 84 | 5  | 3 | 3.5 | B |
| 26123120 | Mullet, baked or broiled, fat added                | 5800_Seafood | 89 | 80 | 9  | 1 | 4   | A |
| 26113190 | Eel, smoked                                        | 5800_Seafood | 89 | 79 | 10 | 1 | 3.5 | D |
| 26127123 | Perch, baked or broiled, no added fat              | 5800_Seafood | 89 | 76 | 13 | 1 | 4   | A |
| 26305121 | Crab, baked or broiled, no added fat               | 5800_Seafood | 89 | 76 | 13 | 1 | 3.5 | C |
| 26100180 | Fish, NS as to type, canned                        | 5800_Seafood | 88 | 80 | 8  | 3 | 4   | A |

|          |                                                |              |    |    |    |   |     |   |
|----------|------------------------------------------------|--------------|----|----|----|---|-----|---|
| 26155110 | Tuna, canned, NS as to oil or water pack       | 5800_Seafood | 88 | 80 | 8  | 3 | 4   | A |
| 26155190 | Tuna, canned, water pack                       | 5800_Seafood | 88 | 80 | 8  | 3 | 4   | A |
| 26317110 | Scallops, cooked, NS as to cooking method      | 5800_Seafood | 88 | 80 | 8  | 1 | 4   | B |
| 26317120 | Scallops, baked or broiled, fat added          | 5800_Seafood | 88 | 80 | 8  | 1 | 4   | B |
| 26113160 | Eel, steamed or poached                        | 5800_Seafood | 88 | 79 | 9  | 1 | 4   | B |
| 26119120 | Herring, baked or broiled, fat added           | 5800_Seafood | 88 | 79 | 9  | 1 | 4   | C |
| 26135120 | Ray, baked or broiled, fat added               | 5800_Seafood | 88 | 79 | 9  | 1 | 4   | B |
| 26143110 | Shark, cooked, NS as to cooking method         | 5800_Seafood | 88 | 79 | 9  | 1 | 4   | B |
| 26143120 | Shark, baked or broiled, fat added             | 5800_Seafood | 88 | 79 | 9  | 1 | 4   | B |
| 26119121 | Herring, baked or broiled, no added fat        | 5800_Seafood | 88 | 78 | 10 | 1 | 4   | B |
| 26158050 | Tilapia, steamed or poached                    | 5800_Seafood | 88 | 77 | 11 | 1 | 4   | A |
| 26111160 | Croaker, steamed or poached                    | 5800_Seafood | 88 | 76 | 12 | 1 | 4   | A |
| 26127160 | Perch, steamed or poached                      | 5800_Seafood | 88 | 74 | 14 | 1 | 4   | A |
| 26155180 | Tuna, canned, oil pack                         | 5800_Seafood | 87 | 81 | 6  | 3 | 4   | B |
| 26315190 | Oysters, smoked                                | 5800_Seafood | 87 | 80 | 7  | 3 | 3.5 | C |
| 26213190 | Squid, canned                                  | 5800_Seafood | 87 | 78 | 9  | 3 | 4   | A |
| 26305180 | Crab, canned                                   | 5800_Seafood | 87 | 78 | 9  | 3 | 4   | B |
| 26303100 | Clams, raw                                     | 5800_Seafood | 87 | 76 | 11 | 1 | 4.5 | A |
| 26205160 | Octopus, steamed                               | 5800_Seafood | 87 | 75 | 12 | 1 | 4   | C |
| 26213160 | Squid, steamed or boiled                       | 5800_Seafood | 87 | 73 | 14 | 1 | 4   | A |
| 26319180 | Shrimp, canned                                 | 5800_Seafood | 86 | 77 | 9  | 3 | 3.5 | D |
| 26137121 | Salmon, baked or broiled, made with butter     | 5800_Seafood | 86 | 76 | 10 | 1 | 4   | B |
| 26123121 | Mullet, baked or broiled, no added fat         | 5800_Seafood | 86 | 74 | 12 | 1 | 4   | A |
| 26311110 | Lobster, cooked, NS as to cooking method       | 5800_Seafood | 86 | 73 | 13 | 1 | 3.5 | C |
| 26121180 | Mackerel, canned                               | 5800_Seafood | 85 | 77 | 8  | 3 | 4   | A |
| 26301110 | Abalone, cooked, NS as to cooking method       | 5800_Seafood | 85 | 77 | 8  | 1 | 4   | B |
| 26143160 | Shark, steamed or poached                      | 5800_Seafood | 85 | 74 | 11 | 1 | 4   | B |
| 26313110 | Mussels, cooked, NS as to cooking method       | 5800_Seafood | 85 | 74 | 11 | 1 | 3.5 | D |
| 26313160 | Mussels, steamed or poached                    | 5800_Seafood | 85 | 74 | 11 | 1 | 3.5 | D |
| 26109123 | Cod, baked or broiled, no added fat            | 5800_Seafood | 85 | 72 | 13 | 1 | 4   | A |
| 26109124 | Cod, baked or broiled, made with cooking spray | 5800_Seafood | 85 | 72 | 13 | 1 | 4   | A |
| 26151190 | Trout, smoked                                  | 5800_Seafood | 84 | 76 | 8  | 3 | 4   | D |
| 26131110 | Pompano, cooked, NS as to cooking method       | 5800_Seafood | 84 | 75 | 9  | 1 | 3.5 | C |
| 26131120 | Pompano, baked or broiled, fat added           | 5800_Seafood | 84 | 75 | 9  | 1 | 3.5 | C |
| 26303110 | Clams, cooked, NS as to cooking method         | 5800_Seafood | 84 | 75 | 9  | 1 | 4   | A |
| 26303120 | Clams, baked or broiled, fat added             | 5800_Seafood | 84 | 75 | 9  | 1 | 4   | A |
| 26319170 | Shrimp, dried                                  | 5800_Seafood | 84 | 74 | 10 | 3 | 0.5 | E |
| 26123160 | Mullet, steamed or poached                     | 5800_Seafood | 84 | 73 | 11 | 1 | 4   | A |
| 26311121 | Lobster, baked or broiled, no added fat        | 5800_Seafood | 84 | 71 | 13 | 1 | 3.5 | D |

|          |                                                              |              |    |    |    |   |     |   |
|----------|--------------------------------------------------------------|--------------|----|----|----|---|-----|---|
| 26109160 | Cod, steamed or poached                                      | 5800_Seafood | 84 | 70 | 14 | 1 | 4   | A |
| 26315110 | Oysters, cooked, NS as to cooking method                     | 5800_Seafood | 83 | 80 | 3  | 2 | 3   | C |
| 26119110 | Herring, cooked, NS as to cooking method                     | 5800_Seafood | 83 | 77 | 6  | 3 | 4   | C |
| 26139190 | Sardines, skinless, boneless, packed in water                | 5800_Seafood | 83 | 77 | 6  | 3 | 4   | B |
| 26100121 | Fish, NS as to type, baked or broiled, made with butter      | 5800_Seafood | 83 | 73 | 10 | 1 | 4   | B |
| 26213170 | Squid, dried                                                 | 5800_Seafood | 83 | 73 | 10 | 3 | 2   | D |
| 26107124 | Catfish, baked or broiled, made with cooking spray           | 5800_Seafood | 83 | 72 | 11 | 1 | 4   | A |
| 26107123 | Catfish, baked or broiled, no added fat                      | 5800_Seafood | 83 | 71 | 12 | 1 | 4   | A |
| 26315160 | Oysters, coated, baked or broiled, fat added                 | 5800_Seafood | 82 | 78 | 4  | 2 | 3   | C |
| 26137130 | Salmon, coated, baked or broiled, made with oil              | 5800_Seafood | 82 | 76 | 6  | 2 | 4   | A |
| 26118030 | Halibut, coated, baked or broiled, made with oil             | 5800_Seafood | 82 | 75 | 7  | 2 | 4   | A |
| 26151121 | Trout, baked or broiled, made with butter                    | 5800_Seafood | 82 | 72 | 10 | 1 | 4   | B |
| 26131121 | Pompano, baked or broiled, no added fat                      | 5800_Seafood | 82 | 71 | 11 | 1 | 3.5 | D |
| 26107160 | Catfish, steamed or poached                                  | 5800_Seafood | 82 | 70 | 12 | 1 | 4   | A |
| 26311160 | Lobster, steamed or boiled                                   | 5800_Seafood | 82 | 69 | 13 | 1 | 3.5 | B |
| 26153130 | Tuna, fresh, coated, baked or broiled, fat added             | 5800_Seafood | 81 | 77 | 4  | 2 | 4   | A |
| 26205110 | Octopus, cooked, NS as to cooking method                     | 5800_Seafood | 81 | 76 | 5  | 2 | 3.5 | C |
| 26107120 | Catfish, baked or broiled, made with oil                     | 5800_Seafood | 81 | 73 | 8  | 1 | 3.5 | B |
| 26305130 | Crab, coated, baked or broiled, fat added                    | 5800_Seafood | 81 | 73 | 8  | 2 | 3.5 | D |
| 26211100 | Roe, sturgeon                                                | 5800_Seafood | 81 | 71 | 10 | 3 | 1   | E |
| 26131190 | Pompano, smoked                                              | 5800_Seafood | 81 | 70 | 11 | 1 | 3.5 | D |
| 27150110 | Shrimp cocktail                                              | 5800_Seafood | 81 | 69 | 12 | 2 | 4   | B |
| 26121160 | Mackerel, pickled                                            | 5800_Seafood | 80 | 74 | 6  | 3 | 3   | D |
| 26149130 | Swordfish, coated, baked or broiled, fat added               | 5800_Seafood | 80 | 73 | 7  | 2 | 3.5 | B |
| 26131160 | Pompano, steamed or poached                                  | 5800_Seafood | 80 | 69 | 11 | 1 | 3.5 | C |
| 26317121 | Scallops, baked or broiled, no added fat                     | 5800_Seafood | 80 | 68 | 12 | 1 | 4   | B |
| 27150140 | Seafood sauce                                                | 5800_Seafood | 79 | 76 | 3  | 2 | 3   | C |
| 26113110 | Eel, cooked, NS as to cooking method                         | 5800_Seafood | 79 | 73 | 6  | 1 | 3.5 | B |
| 26137134 | Salmon, coated, baked or broiled, made with cooking spray    | 5800_Seafood | 79 | 71 | 8  | 1 | 4   | A |
| 26137133 | Salmon, coated, baked or broiled, no added fat               | 5800_Seafood | 79 | 70 | 9  | 1 | 4   | A |
| 26151150 | Trout, battered, fried                                       | 5800_Seafood | 79 | 69 | 10 | 1 | 4   | A |
| 26303121 | Clams, baked or broiled, no added fat                        | 5800_Seafood | 79 | 66 | 13 | 1 | 4   | A |
| 26315140 | Oysters, coated, fried                                       | 5800_Seafood | 78 | 73 | 5  | 2 | 3   | C |
| 26105110 | Carp, cooked, NS as to cooking method                        | 5800_Seafood | 78 | 72 | 6  | 2 | 3.5 | B |
| 26137140 | Salmon, coated, fried, made with oil                         | 5800_Seafood | 78 | 72 | 6  | 2 | 3.5 | B |
| 26100130 | Fish, NS as to type, coated, baked or broiled, made with oil | 5800_Seafood | 78 | 71 | 7  | 2 | 4   | A |
| 26117130 | Haddock, coated, baked or broiled, fat added                 | 5800_Seafood | 78 | 71 | 7  | 2 | 4   | A |
| 26151130 | Trout, coated, baked or broiled, made with oil               | 5800_Seafood | 78 | 71 | 7  | 2 | 4   | B |
| 26303180 | Clams, canned                                                | 5800_Seafood | 78 | 69 | 9  | 3 | 4.5 | A |



|          |                                                             |              |    |    |    |   |     |   |
|----------|-------------------------------------------------------------|--------------|----|----|----|---|-----|---|
| 26137150 | Salmon, battered, fried                                     | 5800_Seafood | 78 | 68 | 10 | 1 | 4   | A |
| 26319121 | Shrimp, baked or broiled, made with butter                  | 5800_Seafood | 78 | 65 | 13 | 1 | 3.5 | B |
| 26157110 | Whiting, cooked, NS as to cooking method                    | 5800_Seafood | 77 | 70 | 7  | 2 | 4   | A |
| 26309140 | Crayfish, coated, fried                                     | 5800_Seafood | 77 | 70 | 7  | 2 | 4   | A |
| 26119190 | Herring, smoked, kippered                                   | 5800_Seafood | 77 | 69 | 8  | 3 | 2   | D |
| 26127110 | Perch, cooked, NS as to cooking method                      | 5800_Seafood | 77 | 69 | 8  | 2 | 4   | A |
| 26153131 | Tuna, fresh, coated, baked or broiled, no added fat         | 5800_Seafood | 77 | 68 | 9  | 2 | 4   | A |
| 26100150 | Fish, NS as to type, battered, fried                        | 5800_Seafood | 77 | 67 | 10 | 1 | 4   | A |
| 26157150 | Whiting, battered, fried                                    | 5800_Seafood | 77 | 66 | 11 | 1 | 4   | A |
| 26115121 | Flounder, baked or broiled, made with butter                | 5800_Seafood | 77 | 65 | 12 | 1 | 3.5 | B |
| 26158011 | Tilapia, baked or broiled, made with butter                 | 5800_Seafood | 77 | 65 | 12 | 1 | 4   | B |
| 26127121 | Perch, baked or broiled, made with butter                   | 5800_Seafood | 77 | 63 | 14 | 1 | 4   | B |
| 26153140 | Tuna, fresh, coated, fried                                  | 5800_Seafood | 76 | 73 | 3  | 2 | 4   | A |
| 26133130 | Porgy, coated, baked or broiled, fat added                  | 5800_Seafood | 76 | 68 | 8  | 2 | 4   | A |
| 26307140 | Crab, soft shell, coated, fried                             | 5800_Seafood | 76 | 68 | 8  | 2 | 3.5 | D |
| 26127130 | Perch, coated, baked or broiled, made with oil              | 5800_Seafood | 76 | 67 | 9  | 2 | 4   | A |
| 26115110 | Flounder, cooked, NS as to cooking method                   | 5800_Seafood | 75 | 69 | 6  | 2 | 3.5 | C |
| 26121140 | Mackerel, coated, fried                                     | 5800_Seafood | 75 | 69 | 6  | 2 | 3.5 | D |
| 26109130 | Cod, coated, baked or broiled, made with oil                | 5800_Seafood | 75 | 68 | 7  | 2 | 3.5 | B |
| 26119130 | Herring, coated, baked or broiled, fat added                | 5800_Seafood | 75 | 68 | 7  | 2 | 3.5 | B |
| 26149140 | Swordfish, coated, fried                                    | 5800_Seafood | 75 | 68 | 7  | 2 | 3.5 | C |
| 26111130 | Croaker, coated, baked or broiled, fat added                | 5800_Seafood | 75 | 67 | 8  | 2 | 4   | B |
| 26157130 | Whiting, coated, baked or broiled, made with oil            | 5800_Seafood | 75 | 67 | 8  | 2 | 4   | A |
| 26319110 | Shrimp, cooked, NS as to cooking method                     | 5800_Seafood | 75 | 67 | 8  | 2 | 3.5 | B |
| 26213140 | Squid, coated, fried                                        | 5800_Seafood | 75 | 66 | 9  | 2 | 3.5 | B |
| 26319160 | Shrimp, coated, baked or broiled, made with oil             | 5800_Seafood | 75 | 66 | 9  | 2 | 3.5 | B |
| 26100133 | Fish, NS as to type, coated, baked or broiled, no added fat | 5800_Seafood | 75 | 65 | 10 | 2 | 4   | A |
| 26101110 | Anchovy, cooked, NS as to cooking method                    | 5800_Seafood | 75 | 65 | 10 | 3 | 0.5 | E |
| 26101180 | Anchovy, canned                                             | 5800_Seafood | 75 | 65 | 10 | 3 | 0.5 | E |
| 26151133 | Trout, coated, baked or broiled, no added fat               | 5800_Seafood | 75 | 65 | 10 | 1 | 4   | A |
| 26109150 | Cod, battered, fried                                        | 5800_Seafood | 75 | 64 | 11 | 1 | 4   | B |
| 26157121 | Whiting, baked or broiled, made with butter                 | 5800_Seafood | 75 | 61 | 14 | 1 | 4   | B |
| 26137142 | Salmon, coated, fried, made with margarine                  | 5800_Seafood | 74 | 67 | 7  | 2 | 3.5 | B |
| 26141130 | Sea bass, coated, baked or broiled, fat added               | 5800_Seafood | 74 | 67 | 7  | 2 | 4   | A |
| 26125130 | Ocean perch, coated, baked or broiled, fat added            | 5800_Seafood | 74 | 66 | 8  | 2 | 3.5 | B |
| 26151140 | Trout, coated, fried, made with oil                         | 5800_Seafood | 74 | 66 | 8  | 2 | 3.5 | B |
| 26137143 | Salmon, coated, fried, no added fat                         | 5800_Seafood | 74 | 64 | 10 | 2 | 4   | B |
| 26317130 | Scallops, steamed or boiled                                 | 5800_Seafood | 74 | 60 | 14 | 1 | 4   | B |
| 26100140 | Fish, NS as to type, coated, fried, made with oil           | 5800_Seafood | 73 | 66 | 7  | 2 | 3.5 | B |

|          |                                                            |              |    |    |    |   |     |   |
|----------|------------------------------------------------------------|--------------|----|----|----|---|-----|---|
| 26115130 | Flounder, coated, baked or broiled, made with oil          | 5800_Seafood | 73 | 66 | 7  | 2 | 3.5 | B |
| 26117140 | Haddock, coated, fried                                     | 5800_Seafood | 73 | 66 | 7  | 2 | 4   | B |
| 26119131 | Herring, coated, baked or broiled, no added fat            | 5800_Seafood | 73 | 63 | 10 | 1 | 3.5 | B |
| 26115150 | Flounder, battered, fried                                  | 5800_Seafood | 73 | 62 | 11 | 1 | 3.5 | B |
| 26127150 | Perch, battered, fried                                     | 5800_Seafood | 73 | 61 | 12 | 1 | 4   | A |
| 26109121 | Cod, baked or broiled, made with butter                    | 5800_Seafood | 73 | 60 | 13 | 1 | 3.5 | B |
| 26303160 | Clams, steamed or boiled                                   | 5800_Seafood | 73 | 59 | 14 | 1 | 4   | A |
| 26158020 | Tilapia, coated, baked or broiled, made with oil           | 5800_Seafood | 72 | 67 | 5  | 2 | 4   | A |
| 26105140 | Carp, coated, fried                                        | 5800_Seafood | 72 | 65 | 7  | 2 | 3.5 | B |
| 26111140 | Croaker, coated, fried                                     | 5800_Seafood | 72 | 64 | 8  | 2 | 3.5 | B |
| 26133140 | Porgy, coated, fried                                       | 5800_Seafood | 72 | 64 | 8  | 2 | 3.5 | B |
| 26311140 | Lobster, coated, fried                                     | 5800_Seafood | 72 | 64 | 8  | 2 | 3.5 | D |
| 26317160 | Scallops, coated, baked or broiled, fat added              | 5800_Seafood | 71 | 65 | 6  | 2 | 3.5 | C |
| 26109140 | Cod, coated, fried, made with oil                          | 5800_Seafood | 71 | 64 | 7  | 2 | 3.5 | B |
| 26157140 | Whiting, coated, fried, made with oil                      | 5800_Seafood | 71 | 64 | 7  | 2 | 4   | A |
| 26119140 | Herring, coated, fried                                     | 5800_Seafood | 71 | 63 | 8  | 2 | 3.5 | D |
| 26127140 | Perch, coated, fried, made with oil                        | 5800_Seafood | 71 | 63 | 8  | 2 | 4   | A |
| 26157132 | Whiting, coated, baked or broiled, made with margarine     | 5800_Seafood | 71 | 62 | 9  | 2 | 4   | B |
| 26158024 | Tilapia, coated, baked or broiled, made with cooking spray | 5800_Seafood | 71 | 61 | 10 | 2 | 4   | A |
| 26107121 | Catfish, baked or broiled, made with butter                | 5800_Seafood | 71 | 60 | 11 | 1 | 3.5 | C |
| 26117131 | Haddock, coated, baked or broiled, no added fat            | 5800_Seafood | 71 | 60 | 11 | 2 | 4   | A |
| 26131131 | Pompano, coated, baked or broiled, no added fat            | 5800_Seafood | 71 | 60 | 11 | 1 | 3.5 | B |
| 26131150 | Pompano, battered, fried                                   | 5800_Seafood | 71 | 60 | 11 | 1 | 3.5 | B |
| 26117150 | Haddock, battered, fried                                   | 5800_Seafood | 71 | 59 | 12 | 1 | 4   | A |
| 26127133 | Perch, coated, baked or broiled, no added fat              | 5800_Seafood | 71 | 58 | 13 | 2 | 4   | A |
| 26319164 | Shrimp, coated, baked or broiled, made with cooking spray  | 5800_Seafood | 71 | 58 | 13 | 2 | 4   | A |
| 26125140 | Ocean perch, coated, fried                                 | 5800_Seafood | 70 | 63 | 7  | 2 | 3.5 | B |
| 26100142 | Fish, NS as to type, coated, fried, made with margarine    | 5800_Seafood | 70 | 62 | 8  | 2 | 3.5 | B |
| 26141140 | Sea bass, coated, fried                                    | 5800_Seafood | 70 | 62 | 8  | 2 | 3.5 | B |
| 26151142 | Trout, coated, fried, made with margarine                  | 5800_Seafood | 70 | 62 | 8  | 2 | 4   | B |
| 26137131 | Salmon, coated, baked or broiled, made with butter         | 5800_Seafood | 70 | 61 | 9  | 2 | 3.5 | C |
| 26319140 | Shrimp, coated, fried, made with oil                       | 5800_Seafood | 70 | 61 | 9  | 2 | 3.5 | B |
| 26100143 | Fish, NS as to type, coated, fried, no added fat           | 5800_Seafood | 70 | 59 | 11 | 2 | 4   | B |
| 26151143 | Trout, coated, fried, no added fat                         | 5800_Seafood | 70 | 59 | 11 | 2 | 4   | B |
| 26157133 | Whiting, coated, baked or broiled, no added fat            | 5800_Seafood | 70 | 59 | 11 | 2 | 4   | A |
| 26100170 | Fish, NS as to type, dried                                 | 5800_Seafood | 70 | 58 | 12 | 3 | 0.5 | E |
| 26109170 | Cod, dried, salted                                         | 5800_Seafood | 70 | 58 | 12 | 3 | 0.5 | E |
| 26115140 | Flounder, coated, fried, made with oil                     | 5800_Seafood | 69 | 62 | 7  | 2 | 3.5 | C |
| 26115132 | Flounder, coated, baked or broiled, made with margarine    | 5800_Seafood | 69 | 61 | 8  | 2 | 3.5 | C |

|          |                                                        |              |    |    |    |   |     |   |
|----------|--------------------------------------------------------|--------------|----|----|----|---|-----|---|
| 26123140 | Mullet, coated, fried                                  | 5800_Seafood | 69 | 61 | 8  | 2 | 3.5 | B |
| 26131140 | Pompano, coated, fried                                 | 5800_Seafood | 69 | 61 | 8  | 2 | 3.5 | D |
| 26158023 | Tilapia, coated, baked or broiled, no added fat        | 5800_Seafood | 69 | 58 | 11 | 2 | 4   | A |
| 26319163 | Shrimp, coated, baked or broiled, no added fat         | 5800_Seafood | 69 | 55 | 14 | 2 | 4   | A |
| 26203110 | Frog legs, NS as to cooking method                     | 5800_Seafood | 68 | 67 | 1  | 2 | 4   | A |
| 26129140 | Pike, coated, fried                                    | 5800_Seafood | 68 | 63 | 5  | 2 | 4   | A |
| 26158030 | Tilapia, coated, fried, made with oil                  | 5800_Seafood | 68 | 63 | 5  | 2 | 4   | B |
| 26158040 | Tilapia, battered, fried                               | 5800_Seafood | 68 | 59 | 9  | 1 | 4   | A |
| 26115133 | Flounder, coated, baked or broiled, no added fat       | 5800_Seafood | 68 | 57 | 11 | 2 | 4   | A |
| 26127143 | Perch, coated, fried, no added fat                     | 5800_Seafood | 68 | 53 | 15 | 2 | 4   | A |
| 26109133 | Cod, coated, baked or broiled, no added fat            | 5800_Seafood | 67 | 56 | 11 | 2 | 4   | A |
| 26109134 | Cod, coated, baked or broiled, made with cooking spray | 5800_Seafood | 67 | 56 | 11 | 2 | 4   | A |
| 27250510 | Fish cake (Kamaboko) tempura                           | 5800_Seafood | 67 | 55 | 12 | 1 | 3   | D |
| 27150070 | Lobster with butter sauce                              | 5800_Seafood | 67 | 53 | 14 | 1 | 3.5 | D |
| 26107150 | Catfish, battered, fried                               | 5800_Seafood | 66 | 58 | 8  | 1 | 4   | A |
| 26319142 | Shrimp, coated, fried, made with margarine             | 5800_Seafood | 66 | 55 | 11 | 3 | 3.5 | C |
| 26109144 | Cod, coated, fried, made with cooking spray            | 5800_Seafood | 66 | 53 | 13 | 2 | 4   | A |
| 26158034 | Tilapia, coated, fried, made with cooking spray        | 5800_Seafood | 66 | 53 | 13 | 2 | 4   | B |
| 26107110 | Catfish, cooked, NS as to cooking method               | 5800_Seafood | 65 | 61 | 4  | 2 | 3.5 | C |
| 26317140 | Scallops, coated, fried                                | 5800_Seafood | 65 | 60 | 5  | 2 | 3.5 | C |
| 26301140 | Abalone, floured or breaded, fried                     | 5800_Seafood | 65 | 59 | 6  | 1 | 3.5 | D |
| 26125150 | Ocean perch, battered, fried                           | 5800_Seafood | 65 | 52 | 13 | 1 | 3.5 | B |
| 26158033 | Tilapia, coated, fried, no added fat                   | 5800_Seafood | 65 | 52 | 13 | 2 | 4   | B |
| 26107130 | Catfish, coated, baked or broiled, made with oil       | 5800_Seafood | 64 | 58 | 6  | 2 | 3.5 | B |
| 26303140 | Clams, coated, fried                                   | 5800_Seafood | 64 | 58 | 6  | 2 | 3.5 | B |
| 26158032 | Tilapia, coated, fried, made with margarine            | 5800_Seafood | 64 | 57 | 7  | 3 | 4   | B |
| 26315150 | Oysters, battered, fried                               | 5800_Seafood | 64 | 54 | 10 | 2 | 3   | C |
| 26319143 | Shrimp, coated, fried, no added fat                    | 5800_Seafood | 64 | 51 | 13 | 2 | 4   | B |
| 26109143 | Cod, coated, fried, no added fat                       | 5800_Seafood | 64 | 50 | 14 | 2 | 4   | A |
| 26137141 | Salmon, coated, fried, made with butter                | 5800_Seafood | 63 | 53 | 10 | 2 | 3.5 | D |
| 26145140 | Smelt, floured or breaded, fried                       | 5800_Seafood | 63 | 52 | 11 | 2 | 3.5 | D |
| 26107133 | Catfish, coated, baked or broiled, no added fat        | 5800_Seafood | 62 | 53 | 9  | 1 | 4   | B |
| 26119180 | Herring, pickled                                       | 5800_Seafood | 61 | 53 | 8  | 3 | 2   | D |
| 26107140 | Catfish, coated, fried, made with oil                  | 5800_Seafood | 60 | 55 | 5  | 2 | 3.5 | C |
| 26107144 | Catfish, coated, fried, made with cooking spray        | 5800_Seafood | 59 | 49 | 10 | 2 | 3.5 | B |
| 26319161 | Shrimp, coated, baked or broiled, made with butter     | 5800_Seafood | 59 | 45 | 14 | 2 | 3.5 | C |
| 26133150 | Porgy, battered, fried                                 | 5800_Seafood | 58 | 52 | 6  | 1 | 4   | A |
| 26158021 | Tilapia, coated, baked or broiled, made with butter    | 5800_Seafood | 58 | 49 | 9  | 2 | 3.5 | B |
| 26107143 | Catfish, coated, fried, no added fat                   | 5800_Seafood | 58 | 48 | 10 | 2 | 3.5 | B |

|          |                                                                               |              |    |    |     |   |     |   |
|----------|-------------------------------------------------------------------------------|--------------|----|----|-----|---|-----|---|
| 26119160 | Herring, pickled, in cream sauce                                              | 5800_Seafood | 57 | 47 | 10  | 3 | 2   | D |
| 26100200 | Fish, NS as to type, from fast food                                           | 5800_Seafood | 55 | 55 | 0   | 4 | 3.5 | C |
| 26317150 | Scallops, battered, fried                                                     | 5800_Seafood | 54 | 43 | 11  | 2 | 3   | D |
| 26127141 | Perch, coated, fried, made with butter                                        | 5800_Seafood | 54 | 41 | 13  | 2 | 3.5 | D |
| 26107131 | Catfish, coated, baked or broiled, made with butter                           | 5800_Seafood | 53 | 44 | 9   | 2 | 3.5 | D |
| 26109141 | Cod, coated, fried, made with butter                                          | 5800_Seafood | 53 | 41 | 12  | 2 | 3   | D |
| 26303150 | Clams, battered, fried                                                        | 5800_Seafood | 52 | 41 | 11  | 2 | 2   | D |
| 26115141 | Flounder, coated, fried, made with butter                                     | 5800_Seafood | 52 | 40 | 12  | 2 | 3   | D |
| 26319141 | Shrimp, coated, fried, made with butter                                       | 5800_Seafood | 52 | 38 | 14  | 2 | 3   | D |
| 26158031 | Tilapia, coated, fried, made with butter                                      | 5800_Seafood | 51 | 42 | 9   | 2 | 3.5 | D |
| 26100260 | Fish stick, patty or nugget from fast food                                    | 5800_Seafood | 41 | 40 | 1   | 4 | 3   | D |
| 26100270 | Fish stick, patty or nugget from restaurant, home, or other place             | 5800_Seafood | 41 | 40 | 1   | 4 | 3   | D |
| 26100210 | Fish stick, patty, or fillet, NS as to type, cooked, NS as to cooking method  | 5800_Seafood | 41 | 38 | 3   | 4 | 3   | D |
| 26100220 | Fish stick, patty, or fillet, NS as to type, baked or broiled                 | 5800_Seafood | 41 | 38 | 3   | 4 | 3   | D |
| 26100230 | Fish stick, patty, or fillet, NS as to type, breaded or battered, baked       | 5800_Seafood | 41 | 38 | 3   | 4 | 3   | D |
| 26100250 | Fish stick, patty, or fillet, NS as to type, battered, fried                  | 5800_Seafood | 40 | 38 | 2   | 4 | 3   | C |
| 26100240 | Fish stick, patty, or fillet, NS as to type, floured or breaded, fried        | 5800_Seafood | 38 | 35 | 3   | 4 | 3   | D |
| 26319145 | Shrimp, coated, fried, from fast food / restaurant                            | 5800_Seafood | 36 | 37 | -1  | 4 | 1.5 | E |
| 27250520 | Seafood restructured                                                          | 5800_Seafood | 30 | 30 | 0   | 4 | 3   | C |
| 11433500 | Yogurt, fruit, nonfat milk, light                                             | 6000_Dairy   | 87 | 99 | -12 | 4 | 4.5 | B |
| 11411300 | Yogurt, nonfat milk, plain                                                    | 6000_Dairy   | 86 | 86 | 0   | 1 | 5   | A |
| 11411420 | Yogurt, Greek, nonfat milk, plain                                             | 6000_Dairy   | 86 | 85 | 1   | 1 | 5   | A |
| 11513854 | Chocolate milk, made from sugar free syrup with fat free milk                 | 6000_Dairy   | 86 | 85 | 1   | 1 | 5   | B |
| 11410000 | Yogurt, NS as to type of milk or flavor                                       | 6000_Dairy   | 83 | 80 | 3   | 1 | 5   | A |
| 11400010 | Yogurt, Greek, NS as to type of milk or flavor                                | 6000_Dairy   | 82 | 77 | 5   | 1 | 5   | A |
| 11411390 | Yogurt, Greek, NS as to type of milk, plain                                   | 6000_Dairy   | 82 | 77 | 5   | 1 | 5   | A |
| 11411410 | Yogurt, Greek, low fat milk, plain                                            | 6000_Dairy   | 82 | 77 | 5   | 1 | 5   | A |
| 11513394 | Chocolate milk, made from no sugar added dry mix with fat free milk (Nesquik) | 6000_Dairy   | 81 | 81 | 0   | 2 | 4.5 | B |
| 11513370 | Chocolate milk, made from reduced sugar mix with fat free milk                | 6000_Dairy   | 80 | 80 | 0   | 2 | 4.5 | B |
| 11400000 | Yogurt, NFS                                                                   | 6000_Dairy   | 80 | 76 | 4   | 1 | 5   | A |
| 11411010 | Yogurt, NS as to type of milk, plain                                          | 6000_Dairy   | 80 | 76 | 4   | 1 | 5   | A |
| 11411200 | Yogurt, low fat milk, plain                                                   | 6000_Dairy   | 80 | 76 | 4   | 1 | 5   | A |
| 11411100 | Yogurt, whole milk, plain                                                     | 6000_Dairy   | 76 | 72 | 4   | 1 | 4.5 | B |
| 11350030 | Almond milk, unsweetened, chocolate                                           | 6000_Dairy   | 75 | 84 | -9  | 4 | 4   | B |
| 11411400 | Yogurt, Greek, whole milk, plain                                              | 6000_Dairy   | 74 | 71 | 3   | 1 | 5   | B |
| 11350020 | Almond milk, unsweetened                                                      | 6000_Dairy   | 73 | 83 | -10 | 4 | 4   | B |
| 11513365 | Chocolate milk, made from reduced sugar mix with low fat milk                 | 6000_Dairy   | 73 | 69 | 4   | 2 | 4.5 | B |
| 11513393 | Chocolate milk, made from no sugar added dry mix with low fat milk (Nesquik)  | 6000_Dairy   | 73 | 69 | 4   | 2 | 4.5 | B |

|          |                                                                                                                              |            |    |    |     |   |     |   |
|----------|------------------------------------------------------------------------------------------------------------------------------|------------|----|----|-----|---|-----|---|
| 11514350 | Hot chocolate / Cocoa, made with no sugar added dry mix and fat free milk                                                    | 6000_Dairy | 72 | 70 | 2   | 2 | 4   | B |
| 11513395 | Chocolate milk, made from no sugar added dry mix with non-dairy milk (Nesquik)                                               | 6000_Dairy | 71 | 79 | -8  | 4 | 4   | C |
| 11513855 | Chocolate milk, made from sugar free syrup with non-dairy milk                                                               | 6000_Dairy | 71 | 78 | -7  | 4 | 4   | B |
| 11513853 | Chocolate milk, made from sugar free syrup with low fat milk                                                                 | 6000_Dairy | 71 | 64 | 7   | 1 | 5   | B |
| 11513360 | Chocolate milk, made from reduced sugar mix with reduced fat milk                                                            | 6000_Dairy | 70 | 65 | 5   | 2 | 4   | B |
| 11513392 | Chocolate milk, made from no sugar added dry mix with reduced fat milk (Nesquik)                                             | 6000_Dairy | 70 | 65 | 5   | 2 | 4   | B |
| 11513350 | Chocolate milk, made from reduced sugar mix, NS as to type of milk                                                           | 6000_Dairy | 69 | 64 | 5   | 2 | 4   | B |
| 11513852 | Chocolate milk, made from sugar free syrup with reduced fat milk                                                             | 6000_Dairy | 69 | 62 | 7   | 1 | 4.5 | B |
| 11513850 | Chocolate milk, made from sugar free syrup, NS as to type of milk                                                            | 6000_Dairy | 68 | 61 | 7   | 1 | 4.5 | B |
| 11115400 | Kefir, NS as to fat content                                                                                                  | 6000_Dairy | 68 | 60 | 8   | 1 | 4.5 | B |
| 11513390 | Chocolate milk, made from no sugar added dry mix, NS as to type of milk (Nesquik)                                            | 6000_Dairy | 67 | 64 | 3   | 2 | 4   | B |
| 11518000 | Milk beverage with nonfat dry milk and low calorie sweetener, water added, chocolate                                         | 6000_Dairy | 66 | 72 | -6  | 4 | 4.5 | B |
| 11113000 | Milk, fat free (skim)                                                                                                        | 6000_Dairy | 66 | 61 | 5   | 1 | 4.5 | B |
| 11114320 | Milk, lactose free, fat free (skim)                                                                                          | 6000_Dairy | 66 | 61 | 5   | 1 | 4.5 | B |
| 11513355 | Chocolate milk, made from reduced sugar mix with whole milk                                                                  | 6000_Dairy | 66 | 60 | 6   | 2 | 4   | C |
| 11513391 | Chocolate milk, made from no sugar added dry mix with whole milk (Nesquik)                                                   | 6000_Dairy | 66 | 60 | 6   | 2 | 4   | C |
| 11516000 | Cocoa, whey, and low-calorie sweetener mixture, lowfat milk added                                                            | 6000_Dairy | 66 | 60 | 6   | 2 | 4.5 | B |
| 11330000 | Milk, soy, dry, reconstituted, not baby's                                                                                    | 6000_Dairy | 65 | 73 | -8  | 4 | 5   | B |
| 11111170 | Milk, calcium fortified, fat free (skim)                                                                                     | 6000_Dairy | 65 | 60 | 5   | 1 | 5   | B |
| 11114321 | Milk, cow's, fluid, lactose reduced, nonfat, fortified with calcium                                                          | 6000_Dairy | 65 | 60 | 5   | 1 | 5   | B |
| 11810000 | Milk, dry, not reconstituted, NS as to fat content                                                                           | 6000_Dairy | 65 | 60 | 5   | 1 | 1   | E |
| 11813000 | Milk, dry, not reconstituted, fat free (skim)                                                                                | 6000_Dairy | 65 | 60 | 5   | 1 | 1   | E |
| 11120000 | Milk, dry, reconstituted, NS as to fat content                                                                               | 6000_Dairy | 65 | 59 | 6   | 1 | 5   | B |
| 11424000 | Yogurt, vanilla, nonfat milk, light                                                                                          | 6000_Dairy | 64 | 73 | -9  | 4 | 4.5 | B |
| 11514360 | Hot chocolate / Cocoa, made with no sugar added dry mix and non-dairy milk                                                   | 6000_Dairy | 64 | 70 | -6  | 4 | 3.5 | C |
| 11812000 | Milk, dry, not reconstituted, low fat (1%)                                                                                   | 6000_Dairy | 64 | 59 | 5   | 1 | 1   | E |
| 11514340 | Hot chocolate / Cocoa, made with no sugar added dry mix and low fat milk                                                     | 6000_Dairy | 64 | 58 | 6   | 2 | 4   | C |
| 11514330 | Hot chocolate / Cocoa, made with no sugar added dry mix and reduced fat milk                                                 | 6000_Dairy | 64 | 57 | 7   | 2 | 3.5 | D |
| 11513851 | Chocolate milk, made from sugar free syrup with whole milk                                                                   | 6000_Dairy | 64 | 56 | 8   | 1 | 4.5 | B |
| 11320100 | Soy milk, light                                                                                                              | 6000_Dairy | 63 | 76 | -13 | 4 | 4.5 | B |
| 11112000 | Milk, cow's, fluid, other than whole, NS as to 2%, 1%, or skim (formerly milk, cow's, fluid, "lowfat", NS as to percent fat) | 6000_Dairy | 62 | 53 | 9   | 1 | 4.5 | B |
| 11428000 | Yogurt, Greek, chocolate, nonfat                                                                                             | 6000_Dairy | 61 | 72 | -11 | 4 | 5   | A |
| 11513375 | Chocolate milk, made from reduced sugar mix with non-dairy milk                                                              | 6000_Dairy | 61 | 71 | -10 | 4 | 4   | C |
| 11446000 | Yogurt parfait, low fat, with fruit                                                                                          | 6000_Dairy | 61 | 70 | -9  | 4 | 4.5 | C |

|          |                                                                            |            |    |    |     |   |     |   |
|----------|----------------------------------------------------------------------------|------------|----|----|-----|---|-----|---|
| 11514320 | Hot chocolate / Cocoa, made with no sugar added dry mix and whole milk     | 6000_Dairy | 61 | 55 | 6   | 2 | 3   | D |
| 11111160 | Milk, calcium fortified, low fat (1%)                                      | 6000_Dairy | 61 | 52 | 9   | 1 | 5   | B |
| 11112120 | Milk, acidophilus, low fat (1%)                                            | 6000_Dairy | 61 | 52 | 9   | 1 | 5   | B |
| 11112210 | Milk, low fat (1%)                                                         | 6000_Dairy | 61 | 52 | 9   | 1 | 5   | B |
| 11114300 | Milk, lactose free, low fat (1%)                                           | 6000_Dairy | 61 | 52 | 9   | 1 | 5   | B |
| 11114310 | Milk, cow's, fluid, lactose reduced, 1% fat, fortified with calcium        | 6000_Dairy | 61 | 52 | 9   | 1 | 4.5 | B |
| 11121300 | Milk, dry, reconstituted, fat free (skim)                                  | 6000_Dairy | 60 | 54 | 6   | 1 | 5   | B |
| 14206010 | Cheese, cottage, lowfat, low sodium                                        | 6000_Dairy | 60 | 53 | 7   | 3 | 5   | A |
| 11121210 | Milk, dry, reconstituted, low fat (1%)                                     | 6000_Dairy | 60 | 52 | 8   | 1 | 4.5 | B |
| 14107040 | Cheese, Mozzarella, reduced sodium                                         | 6000_Dairy | 59 | 51 | 8   | 3 | 5   | C |
| 11112110 | Milk, reduced fat (2%)                                                     | 6000_Dairy | 59 | 50 | 9   | 1 | 4.5 | B |
| 11112130 | Milk, acidophilus, reduced fat (2%)                                        | 6000_Dairy | 59 | 50 | 9   | 1 | 4.5 | B |
| 11114330 | Milk, lactose free, reduced fat (2%)                                       | 6000_Dairy | 59 | 50 | 9   | 1 | 4.5 | B |
| 11424520 | Yogurt, Greek, vanilla, nonfat                                             | 6000_Dairy | 58 | 69 | -11 | 4 | 5   | A |
| 11435030 | Yogurt, Greek, nonfat milk, flavors other than fruit                       | 6000_Dairy | 58 | 69 | -11 | 4 | 5   | A |
| 11527000 | Milk, malted, fortified, NS as to flavor, made with milk                   | 6000_Dairy | 58 | 56 | 2   | 2 | 3.5 | E |
| 11212100 | Milk, evaporated, skim, undiluted                                          | 6000_Dairy | 58 | 53 | 5   | 2 | 4.5 | E |
| 14109020 | Cheese, Swiss, reduced sodium                                              | 6000_Dairy | 58 | 52 | 6   | 3 | 5   | C |
| 11100000 | Milk, NFS                                                                  | 6000_Dairy | 58 | 49 | 9   | 1 | 4.5 | B |
| 11514300 | Cocoa with nonfat dry milk and low calorie sweetener, mixture, water added | 6000_Dairy | 57 | 62 | -5  | 4 | 4   | B |
| 11513300 | Chocolate milk, made from dry mix with fat free milk                       | 6000_Dairy | 57 | 59 | -2  | 2 | 4   | C |
| 11212000 | Milk, evaporated, skim, NS as to dilution                                  | 6000_Dairy | 57 | 52 | 5   | 2 | 4.5 | B |
| 11111100 | Milk, low sodium, whole                                                    | 6000_Dairy | 57 | 49 | 8   | 1 | 3.5 | C |
| 11519040 | Strawberry milk, NFS                                                       | 6000_Dairy | 57 | 49 | 8   | 1 | 4   | B |
| 11114200 | Milk, cow's, fluid, filled with vegetable oil, lowfat                      | 6000_Dairy | 57 | 48 | 9   | 1 | 5   | B |
| 11122000 | Buttermilk, dry, reconstituted                                             | 6000_Dairy | 57 | 46 | 11  | 1 | 5   | B |
| 11212050 | Milk, evaporated, fat free (skim)                                          | 6000_Dairy | 56 | 52 | 4   | 2 | 4.5 | E |
| 11320000 | Soy milk                                                                   | 6000_Dairy | 55 | 69 | -14 | 4 | 4.5 | B |
| 11514500 | Cocoa, whey, and low calorie sweetener, mixture, fortified, water added    | 6000_Dairy | 55 | 61 | -6  | 4 | 4   | B |
| 14109030 | Cheese, Swiss, reduced fat                                                 | 6000_Dairy | 55 | 45 | 10  | 3 | 5   | A |
| 11434020 | Yogurt, Greek, nonfat milk, fruit                                          | 6000_Dairy | 54 | 66 | -12 | 4 | 5   | B |
| 11514310 | Hot chocolate / Cocoa, made with no sugar added dry mix and water          | 6000_Dairy | 54 | 59 | -5  | 4 | 4   | C |
| 11111000 | Milk, whole                                                                | 6000_Dairy | 54 | 45 | 9   | 1 | 4.5 | B |
| 11111150 | Milk, calcium fortified, whole                                             | 6000_Dairy | 54 | 45 | 9   | 1 | 4.5 | B |
| 11114350 | Milk, lactose free, whole                                                  | 6000_Dairy | 54 | 45 | 9   | 1 | 4.5 | B |
| 11513384 | Chocolate milk, made from dry mix with fat free milk (Nesquik)             | 6000_Dairy | 53 | 60 | -7  | 2 | 4   | C |
| 11211400 | Milk, evaporated, reduced fat (2%)                                         | 6000_Dairy | 53 | 45 | 8   | 2 | 3.5 | E |
| 11811000 | Milk, dry, not reconstituted, whole                                        | 6000_Dairy | 53 | 44 | 9   | 1 | 0.5 | E |

|          |                                                                     |            |    |    |     |   |     |   |
|----------|---------------------------------------------------------------------|------------|----|----|-----|---|-----|---|
| 11121100 | Milk, dry, reconstituted, whole                                     | 6000_Dairy | 53 | 43 | 10  | 1 | 3.5 | C |
| 11434300 | Yogurt, nonfat milk, flavors other than fruit                       | 6000_Dairy | 52 | 60 | -8  | 4 | 4.5 | B |
| 14610520 | Cheese ball                                                         | 6000_Dairy | 52 | 53 | -1  | 3 | 5   | D |
| 11525000 | Milk, malted, natural flavor, made with milk                        | 6000_Dairy | 52 | 44 | 8   | 2 | 3.5 | C |
| 14108050 | Cheese, Parmesan, low sodium                                        | 6000_Dairy | 52 | 44 | 8   | 3 | 5   | C |
| 14110010 | Cheese, Cheddar, reduced sodium                                     | 6000_Dairy | 52 | 44 | 8   | 3 | 5   | C |
| 11300100 | Non-dairy milk, NFS                                                 | 6000_Dairy | 51 | 66 | -15 | 4 | 4   | C |
| 11513382 | Chocolate milk, made from dry mix with reduced fat milk (Nesquik)   | 6000_Dairy | 51 | 46 | 5   | 2 | 3.5 | D |
| 11519210 | Strawberry milk, reduced sugar                                      | 6000_Dairy | 51 | 42 | 9   | 1 | 4.5 | B |
| 11116000 | Goat's milk, whole                                                  | 6000_Dairy | 51 | 41 | 10  | 1 | 4   | C |
| 11526000 | Milk, malted                                                        | 6000_Dairy | 50 | 44 | 6   | 2 | 4   | C |
| 14200100 | Cheese, cottage, NFS                                                | 6000_Dairy | 50 | 41 | 9   | 3 | 4.5 | C |
| 14204010 | Cheese, cottage, low fat                                            | 6000_Dairy | 50 | 41 | 9   | 3 | 4.5 | C |
| 14207010 | Cheese, cottage, lowfat, lactose reduced                            | 6000_Dairy | 50 | 41 | 9   | 3 | 4.5 | C |
| 11115200 | Buttermilk, reduced fat (2%)                                        | 6000_Dairy | 50 | 40 | 10  | 1 | 3.5 | C |
| 11321100 | Soy milk, light, chocolate                                          | 6000_Dairy | 49 | 66 | -17 | 4 | 4   | C |
| 11321200 | Soy milk, nonfat, chocolate                                         | 6000_Dairy | 49 | 66 | -17 | 4 | 4   | C |
| 11433000 | Yogurt, nonfat milk, fruit                                          | 6000_Dairy | 49 | 59 | -10 | 4 | 4.5 | B |
| 11513200 | Chocolate milk, made from dry mix with low fat milk                 | 6000_Dairy | 49 | 46 | 3   | 2 | 4   | D |
| 11513150 | Chocolate milk, made from dry mix with reduced fat milk             | 6000_Dairy | 49 | 45 | 4   | 2 | 3.5 | D |
| 11513000 | Chocolate milk, made from dry mix, NS as to type of milk            | 6000_Dairy | 49 | 44 | 5   | 2 | 3.5 | D |
| 11513380 | Chocolate milk, made from dry mix, NS as to type of milk (Nesquik)  | 6000_Dairy | 49 | 44 | 5   | 2 | 3.5 | D |
| 14109040 | Cheese, Swiss, nonfat or fat free                                   | 6000_Dairy | 49 | 43 | 6   | 3 | 5   | C |
| 11115300 | Buttermilk, whole                                                   | 6000_Dairy | 49 | 41 | 8   | 1 | 4   | C |
| 11114000 | Milk, cow's, fluid, filled with vegetable oil, NS as to percent fat | 6000_Dairy | 49 | 40 | 9   | 1 | 3.5 | C |
| 11114100 | Milk, cow's, fluid, filled with vegetable oil, whole                | 6000_Dairy | 49 | 40 | 9   | 1 | 3.5 | C |
| 11115000 | Buttermilk, fat free (skim)                                         | 6000_Dairy | 49 | 38 | 11  | 1 | 4.5 | B |
| 11115100 | Buttermilk, low fat (1%)                                            | 6000_Dairy | 49 | 38 | 11  | 1 | 4.5 | B |
| 11422100 | Yogurt, vanilla, low fat milk, light                                | 6000_Dairy | 48 | 49 | -1  | 4 | 4.5 | A |
| 14107060 | Cheese, Mozzarella, nonfat or fat free                              | 6000_Dairy | 48 | 41 | 7   | 3 | 5   | C |
| 11425000 | Yogurt, chocolate, NS as to type of milk                            | 6000_Dairy | 47 | 56 | -9  | 4 | 4   | C |
| 11435100 | Yogurt, Greek, with oats                                            | 6000_Dairy | 47 | 56 | -9  | 4 | 5   | B |
| 11427000 | Yogurt, chocolate, nonfat milk                                      | 6000_Dairy | 47 | 55 | -8  | 4 | 4   | C |
| 11434090 | Yogurt, NS as to type of milk, flavors other than fruit             | 6000_Dairy | 47 | 51 | -4  | 4 | 4.5 | A |
| 11434200 | Yogurt, low fat milk, flavors other than fruit                      | 6000_Dairy | 47 | 51 | -4  | 4 | 4.5 | A |
| 11514140 | Hot chocolate / Cocoa, made with dry mix and fat free milk          | 6000_Dairy | 47 | 49 | -2  | 3 | 2.5 | E |
| 11513100 | Chocolate milk, made from dry mix with whole milk                   | 6000_Dairy | 47 | 41 | 6   | 2 | 3   | E |
| 14201500 | Cheese, Ricotta                                                     | 6000_Dairy | 47 | 40 | 7   | 3 | 4   | C |
| 11210000 | Milk, evaporated, NS as to fat content and dilution                 | 6000_Dairy | 47 | 39 | 8   | 2 | 3.5 | C |

|          |                                                               |            |    |    |     |   |     |   |
|----------|---------------------------------------------------------------|------------|----|----|-----|---|-----|---|
| 14109010 | Cheese, Swiss                                                 | 6000_Dairy | 47 | 37 | 10  | 3 | 5   | C |
| 11320200 | Soy milk, nonfat                                              | 6000_Dairy | 46 | 59 | -13 | 4 | 4.5 | B |
| 11520000 | Milk, malted, unfortified, NS as to flavor, made with milk    | 6000_Dairy | 46 | 41 | 5   | 2 | 3.5 | D |
| 11211000 | Milk, evaporated, whole, NS as to dilution                    | 6000_Dairy | 46 | 38 | 8   | 2 | 3.5 | C |
| 11211100 | Milk, evaporated, whole, undiluted                            | 6000_Dairy | 46 | 37 | 9   | 2 | 2   | E |
| 11321000 | Soy milk, chocolate                                           | 6000_Dairy | 45 | 60 | -15 | 4 | 4   | D |
| 11444000 | Yogurt, fruit and nuts, NS as to type of milk                 | 6000_Dairy | 45 | 55 | -10 | 4 | 3.5 | C |
| 11445000 | Yogurt, fruit and nuts, lowfat milk                           | 6000_Dairy | 45 | 55 | -10 | 4 | 3.5 | C |
| 14410130 | Cheese, American, nonfat or fat free                          | 6000_Dairy | 45 | 47 | -2  | 4 | 5   | D |
| 11513383 | Chocolate milk, made from dry mix with low fat milk (Nesquik) | 6000_Dairy | 45 | 46 | -1  | 2 | 4   | D |
| 11432500 | Yogurt, fruit, low fat milk, light                            | 6000_Dairy | 45 | 45 | 0   | 4 | 5   | A |
| 14202020 | Cheese, cottage, with vegetables                              | 6000_Dairy | 45 | 44 | 1   | 4 | 4.5 | B |
| 11513804 | Chocolate milk, made from light syrup with fat free milk      | 6000_Dairy | 45 | 43 | 2   | 2 | 4   | B |
| 14203010 | Cheese, cottage, dry curd                                     | 6000_Dairy | 45 | 39 | 6   | 3 | 5   | A |
| 11210050 | Milk, evaporated, NS as to fat content                        | 6000_Dairy | 45 | 36 | 9   | 2 | 2   | E |
| 11211050 | Milk, evaporated, whole                                       | 6000_Dairy | 45 | 36 | 9   | 2 | 2   | E |
| 14107010 | Cheese, Mozzarella, NFS                                       | 6000_Dairy | 45 | 35 | 10  | 3 | 5   | D |
| 14107030 | Cheese, Mozzarella, part skim                                 | 6000_Dairy | 45 | 35 | 10  | 3 | 5   | D |
| 14108420 | Cheese, provolone, reduced fat                                | 6000_Dairy | 45 | 35 | 10  | 3 | 5   | D |
| 11360000 | Rice milk                                                     | 6000_Dairy | 44 | 49 | -5  | 4 | 3.5 | D |
| 92205000 | Rice beverage                                                 | 6000_Dairy | 44 | 49 | -5  | 4 | 3.5 | D |
| 11433990 | Yogurt, Greek, NS as to type of milk, fruit                   | 6000_Dairy | 44 | 48 | -4  | 4 | 5   | B |
| 11434010 | Yogurt, Greek, low fat milk, fruit                            | 6000_Dairy | 44 | 48 | -4  | 4 | 5   | B |
| 11522000 | Milk, malted, unfortified, natural flavor, made with milk     | 6000_Dairy | 44 | 37 | 7   | 2 | 4   | D |
| 11211200 | Milk, evaporated, whole, diluted                              | 6000_Dairy | 44 | 35 | 9   | 2 | 3.5 | C |
| 14107250 | Cheese, Muenster, reduced fat                                 | 6000_Dairy | 44 | 35 | 9   | 3 | 5   | D |
| 14104015 | Cheese, natural, Cheddar or American type, reduced fat        | 6000_Dairy | 44 | 34 | 10  | 3 | 5   | D |
| 14201010 | Cheese, cottage, creamed, large or small curd                 | 6000_Dairy | 44 | 34 | 10  | 3 | 4.5 | B |
| 14104110 | Cheese, Cheddar, reduced fat                                  | 6000_Dairy | 44 | 33 | 11  | 3 | 5   | D |
| 11430000 | Yogurt, NS as to type of milk, fruit                          | 6000_Dairy | 43 | 47 | -4  | 4 | 4   | C |
| 11432000 | Yogurt, low fat milk, fruit                                   | 6000_Dairy | 43 | 47 | -4  | 4 | 4   | C |
| 14502000 | Imitation cheese                                              | 6000_Dairy | 43 | 47 | -4  | 4 | 5   | C |
| 14502040 | Imitation cheese, American or cheddar type, low cholesterol   | 6000_Dairy | 43 | 47 | -4  | 4 | 5   | C |
| 14410210 | Cheese, American, reduced sodium                              | 6000_Dairy | 43 | 42 | 1   | 4 | 5   | C |
| 14120020 | Cheese, Mexican blend, reduced fat                            | 6000_Dairy | 43 | 33 | 10  | 3 | 5   | D |
| 14110030 | Cheese, Cheddar or Colby, lowfat                              | 6000_Dairy | 43 | 32 | 11  | 3 | 5   | C |
| 11350000 | Almond milk, sweetened                                        | 6000_Dairy | 42 | 57 | -15 | 4 | 4   | C |
| 11436000 | Yogurt, liquid                                                | 6000_Dairy | 42 | 47 | -5  | 4 | 4.5 | D |
| 11513381 | Chocolate milk, made from dry mix with whole milk (Nesquik)   | 6000_Dairy | 42 | 41 | 1   | 2 | 3   | E |



|          |                                                                 |            |    |    |     |   |     |   |
|----------|-----------------------------------------------------------------|------------|----|----|-----|---|-----|---|
| 11514120 | Hot chocolate / Cocoa, made with dry mix and reduced fat milk   | 6000_Dairy | 42 | 37 | 5   | 3 | 2   | E |
| 11513803 | Chocolate milk, made from light syrup with low fat milk         | 6000_Dairy | 42 | 35 | 7   | 2 | 4   | C |
| 14203020 | Cheese, cottage, salted, dry curd                               | 6000_Dairy | 42 | 35 | 7   | 3 | 4   | C |
| 14108060 | Cheese, Parmesan, dry grated, fat free                          | 6000_Dairy | 42 | 33 | 9   | 3 | 5   | D |
| 14104400 | Cheese, Feta                                                    | 6000_Dairy | 42 | 32 | 10  | 3 | 4   | E |
| 14010000 | Cheese, NFS                                                     | 6000_Dairy | 42 | 31 | 11  | 3 | 3.5 | D |
| 11513310 | Chocolate milk, made from dry mix with non-dairy milk           | 6000_Dairy | 41 | 55 | -14 | 4 | 3.5 | E |
| 11513385 | Chocolate milk, made from dry mix with non-dairy milk (Nesquik) | 6000_Dairy | 41 | 55 | -14 | 4 | 3.5 | E |
| 11513805 | Chocolate milk, made from light syrup with non-dairy milk       | 6000_Dairy | 41 | 55 | -14 | 4 | 3.5 | D |
| 11435000 | Yogurt, Greek, NS as to type of milk, flavors other than fruit  | 6000_Dairy | 41 | 47 | -6  | 4 | 4.5 | B |
| 11431000 | Yogurt, whole milk, fruit                                       | 6000_Dairy | 41 | 43 | -2  | 4 | 3.5 | C |
| 14202010 | Cheese, cottage, with fruit                                     | 6000_Dairy | 41 | 40 | 1   | 4 | 4.5 | B |
| 11514130 | Hot chocolate / Cocoa, made with dry mix and low fat milk       | 6000_Dairy | 41 | 37 | 4   | 3 | 2.5 | E |
| 42401010 | Coconut milk, used in cooking                                   | 6000_Dairy | 41 | 36 | 5   | 2 | 0.5 | D |
| 11513800 | Chocolate milk, made from light syrup, NS as to type of milk    | 6000_Dairy | 41 | 34 | 7   | 2 | 3.5 | C |
| 11513802 | Chocolate milk, made from light syrup with reduced fat milk     | 6000_Dairy | 41 | 34 | 7   | 2 | 4   | C |
| 14103010 | Cheese, Camembert                                               | 6000_Dairy | 41 | 31 | 10  | 3 | 4   | D |
| 14133000 | Queso Fresco                                                    | 6000_Dairy | 41 | 30 | 11  | 3 | 5   | D |
| 14203510 | Puerto Rican white cheese                                       | 6000_Dairy | 41 | 30 | 11  | 3 | 0.5 | D |
| 11424510 | Yogurt, Greek, vanilla, low fat                                 | 6000_Dairy | 40 | 45 | -5  | 4 | 4.5 | B |
| 11435020 | Yogurt, Greek, low fat milk, flavors other than fruit           | 6000_Dairy | 40 | 45 | -5  | 4 | 4.5 | B |
| 14104115 | Cheese, Cheddar, nonfat or fat free                             | 6000_Dairy | 40 | 33 | 7   | 3 | 5   | C |
| 14105200 | Cheese, Gruyere                                                 | 6000_Dairy | 40 | 31 | 9   | 3 | 3.5 | D |
| 14108015 | Cheese, Parmesan, dry grated, reduced fat                       | 6000_Dairy | 40 | 31 | 9   | 3 | 3.5 | E |
| 14010100 | Cheese, Cheddar or American type, NS as to natural or processed | 6000_Dairy | 40 | 30 | 10  | 3 | 3   | D |
| 14108400 | Cheese, Provolone                                               | 6000_Dairy | 40 | 30 | 10  | 3 | 3.5 | D |
| 14134000 | Queso cotija                                                    | 6000_Dairy | 40 | 30 | 10  | 3 | 1.5 | E |
| 14100100 | Cheese, natural, NFS                                            | 6000_Dairy | 40 | 29 | 11  | 3 | 4   | D |
| 14104700 | Cheese, goat                                                    | 6000_Dairy | 40 | 29 | 11  | 3 | 4   | D |
| 11514110 | Hot chocolate / Cocoa, made with dry mix and whole milk         | 6000_Dairy | 39 | 33 | 6   | 3 | 2   | E |
| 14610250 | Cheese, cottage cheese, with gelatin dessert and vegetables     | 6000_Dairy | 39 | 32 | 7   | 3 | 4   | B |
| 11513801 | Chocolate milk, made from light syrup with whole milk           | 6000_Dairy | 39 | 31 | 8   | 2 | 3.5 | D |
| 14107020 | Cheese, Mozzarella, whole milk                                  | 6000_Dairy | 39 | 30 | 9   | 3 | 5   | D |
| 14108010 | Cheese, Parmesan, dry grated                                    | 6000_Dairy | 39 | 30 | 9   | 3 | 1   | E |
| 14108020 | Cheese, Parmesan, hard                                          | 6000_Dairy | 39 | 30 | 9   | 3 | 1   | E |
| 14102010 | Cheese, Brick                                                   | 6000_Dairy | 39 | 29 | 10  | 3 | 4   | D |
| 14107200 | Cheese, Muenster                                                | 6000_Dairy | 39 | 29 | 10  | 3 | 3.5 | D |
| 14105010 | Cheese, Gouda or Edam                                           | 6000_Dairy | 39 | 28 | 11  | 3 | 3.5 | D |
| 14106500 | Cheese, Monterey, reduced fat                                   | 6000_Dairy | 39 | 28 | 11  | 3 | 4.5 | D |

|          |                                                                   |            |    |    |     |   |     |   |
|----------|-------------------------------------------------------------------|------------|----|----|-----|---|-----|---|
| 14108200 | Cheese, Port du Salut                                             | 6000_Dairy | 39 | 28 | 11  | 3 | 3.5 | D |
| 14106010 | Cheese, Limburger                                                 | 6000_Dairy | 38 | 28 | 10  | 3 | 4   | D |
| 14103020 | Cheese, Brie                                                      | 6000_Dairy | 38 | 27 | 11  | 3 | 4   | D |
| 14201200 | Cottage cheese, farmer's                                          | 6000_Dairy | 38 | 27 | 11  | 3 | 3.5 | C |
| 14104100 | Cheese, Cheddar                                                   | 6000_Dairy | 38 | 26 | 12  | 3 | 3   | D |
| 14504010 | Imitation mozzarella cheese                                       | 6000_Dairy | 37 | 41 | -4  | 4 | 5   | D |
| 11426000 | Yogurt, chocolate, whole milk                                     | 6000_Dairy | 37 | 40 | -3  | 4 | 3.5 | C |
| 14660200 | Mozzarella sticks, breaded, baked, or fried                       | 6000_Dairy | 37 | 32 | 5   | 3 | 5   | D |
| 11519105 | Strawberry milk, reduced fat                                      | 6000_Dairy | 37 | 31 | 6   | 2 | 3   | D |
| 14101010 | Cheese, Blue or Roquefort                                         | 6000_Dairy | 37 | 27 | 10  | 3 | 2   | E |
| 14104200 | Cheese, Colby                                                     | 6000_Dairy | 37 | 27 | 10  | 3 | 3.5 | D |
| 14104250 | Cheese, Colby Jack                                                | 6000_Dairy | 37 | 26 | 11  | 3 | 3.5 | D |
| 14120010 | Cheese, Mexican blend                                             | 6000_Dairy | 37 | 26 | 11  | 3 | 4   | D |
| 11420000 | Yogurt, vanilla, NS as to type of milk                            | 6000_Dairy | 36 | 41 | -5  | 4 | 4   | B |
| 11422000 | Yogurt, vanilla, low fat milk                                     | 6000_Dairy | 36 | 41 | -5  | 4 | 4   | B |
| 11435010 | Yogurt, Greek, whole milk, flavors other than fruit               | 6000_Dairy | 36 | 40 | -4  | 4 | 4.5 | B |
| 11511700 | Chocolate milk, ready to drink, low fat, no sugar added (Nesquik) | 6000_Dairy | 36 | 35 | 1   | 4 | 4   | C |
| 14204020 | Cheese, cottage, lowfat, with fruit                               | 6000_Dairy | 36 | 35 | 1   | 4 | 4.5 | B |
| 11541110 | Milk shake, home recipe, chocolate                                | 6000_Dairy | 36 | 32 | 4   | 3 | 2   | E |
| 11541135 | Milk shake, home recipe, flavors other than chocolate, light      | 6000_Dairy | 36 | 31 | 5   | 3 | 3   | E |
| 11541120 | Milk shake, home recipe, flavors other than chocolate             | 6000_Dairy | 36 | 30 | 6   | 3 | 2   | E |
| 14104010 | Cheese, natural, Cheddar or American type                         | 6000_Dairy | 36 | 26 | 10  | 3 | 2.5 | D |
| 14104020 | Cheese, Cheddar or American type, dry, grated                     | 6000_Dairy | 36 | 26 | 10  | 3 | 0.5 | E |
| 14104600 | Cheese, Fontina                                                   | 6000_Dairy | 36 | 26 | 10  | 3 | 3   | D |
| 14102110 | Cheese, Brick, with salami                                        | 6000_Dairy | 36 | 25 | 11  | 3 | 4   | D |
| 14106200 | Cheese, Monterey                                                  | 6000_Dairy | 36 | 25 | 11  | 3 | 3.5 | D |
| 11434100 | Yogurt, whole milk, flavors other than fruit                      | 6000_Dairy | 35 | 39 | -4  | 4 | 4   | B |
| 11424500 | Yogurt, Greek, vanilla, whole milk                                | 6000_Dairy | 35 | 38 | -3  | 4 | 4   | C |
| 11519205 | Strawberry milk, fat free                                         | 6000_Dairy | 35 | 36 | -1  | 2 | 3.5 | D |
| 14410350 | Cheese, processed, American or Cheddar type, nonfat or fat free   | 6000_Dairy | 35 | 36 | -1  | 4 | 5   | D |
| 14131500 | Queso Asadero                                                     | 6000_Dairy | 35 | 24 | 11  | 3 | 4   | D |
| 14132000 | Queso Chihuahua                                                   | 6000_Dairy | 35 | 23 | 12  | 3 | 3.5 | D |
| 11350010 | Almond milk, sweetened, chocolate                                 | 6000_Dairy | 34 | 50 | -16 | 4 | 3.5 | D |
| 11423000 | Yogurt, vanilla, nonfat milk                                      | 6000_Dairy | 34 | 44 | -10 | 4 | 4.5 | A |
| 11519200 | Strawberry milk, low fat                                          | 6000_Dairy | 34 | 30 | 4   | 2 | 3.5 | D |
| 89901020 | Cheese sauce, for use with vegetables                             | 6000_Dairy | 34 | 24 | 10  | 3 | 5   | D |
| 14131000 | Queso Anejo, aged Mexican cheese                                  | 6000_Dairy | 34 | 23 | 11  | 3 | 2   | E |
| 11541500 | Milk shake, made with skim milk, chocolate                        | 6000_Dairy | 33 | 32 | 1   | 3 | 2.5 | E |
| 14410420 | Cheese, processed, Swiss, lowfat                                  | 6000_Dairy | 33 | 29 | 4   | 4 | 5   | D |

|          |                                                                   |            |    |    |     |   |     |   |
|----------|-------------------------------------------------------------------|------------|----|----|-----|---|-----|---|
| 11541400 | Milk shake with malt                                              | 6000_Dairy | 33 | 28 | 5   | 3 | 2   | E |
| 11519215 | Strawberry milk, non-dairy                                        | 6000_Dairy | 32 | 46 | -14 | 4 | 3   | E |
| 11421000 | Yogurt, vanilla, whole milk                                       | 6000_Dairy | 32 | 35 | -3  | 4 | 4   | C |
| 11513700 | Chocolate milk, made from syrup with fat free milk                | 6000_Dairy | 32 | 33 | -1  | 3 | 3.5 | E |
| 11541130 | Milk shake, home recipe, chocolate, light                         | 6000_Dairy | 32 | 30 | 2   | 3 | 3   | E |
| 11541510 | Milk shake, made with skim milk, flavors other than chocolate     | 6000_Dairy | 32 | 30 | 2   | 3 | 2.5 | E |
| 11519050 | Strawberry milk, whole                                            | 6000_Dairy | 32 | 26 | 6   | 2 | 2.5 | E |
| 11434000 | Yogurt, Greek, whole milk, fruit                                  | 6000_Dairy | 31 | 38 | -7  | 4 | 4.5 | B |
| 14610210 | Cheese, cottage cheese, with gelatin dessert and fruit            | 6000_Dairy | 31 | 27 | 4   | 3 | 4.5 | B |
| 11513400 | Chocolate milk, made from syrup, NS as to type of milk            | 6000_Dairy | 31 | 26 | 5   | 2 | 3.5 | E |
| 11531500 | Eggnog, lowfat / light                                            | 6000_Dairy | 31 | 25 | 6   | 4 | 4   | C |
| 11513750 | Chocolate milk, made from syrup with non-dairy milk               | 6000_Dairy | 30 | 44 | -14 | 4 | 3   | E |
| 11511200 | Chocolate milk, ready to drink, reduced fat                       | 6000_Dairy | 30 | 30 | 0   | 4 | 3   | E |
| 14410330 | Cheese spread, American or Cheddar cheese base, reduced fat       | 6000_Dairy | 30 | 28 | 2   | 4 | 5   | D |
| 11513550 | Chocolate milk, made from syrup with reduced fat milk             | 6000_Dairy | 30 | 26 | 4   | 2 | 3.5 | E |
| 11513600 | Chocolate milk, made from syrup with low fat milk                 | 6000_Dairy | 30 | 26 | 4   | 2 | 3.5 | E |
| 11519000 | Milk beverage, made with whole milk, flavors other than chocolate | 6000_Dairy | 30 | 25 | 5   | 2 | 2.5 | E |
| 14410300 | Cheese, processed, American or Cheddar type, lowfat               | 6000_Dairy | 30 | 24 | 6   | 4 | 5   | D |
| 11514150 | Hot chocolate / Cocoa, made with dry mix and non-dairy milk       | 6000_Dairy | 29 | 39 | -10 | 4 | 2.5 | E |
| 11512000 | Cocoa, hot chocolate, not from dry mix, made with whole milk      | 6000_Dairy | 29 | 32 | -3  | 4 | 3   | E |
| 14410120 | Cheese, American, reduced fat                                     | 6000_Dairy | 29 | 28 | 1   | 4 | 5   | E |
| 14410110 | Cheese, American                                                  | 6000_Dairy | 29 | 27 | 2   | 4 | 3.5 | E |
| 14410500 | Cheese, processed cheese food                                     | 6000_Dairy | 29 | 27 | 2   | 4 | 3.5 | E |
| 14410620 | Cheese, with wine                                                 | 6000_Dairy | 29 | 27 | 2   | 4 | 3.5 | E |
| 11541100 | Milk shake, homemade or fountain-type, NS as to flavor            | 6000_Dairy | 29 | 26 | 3   | 2 | 1   | E |
| 14410200 | Cheese, processed, American or Cheddar type                       | 6000_Dairy | 29 | 26 | 3   | 4 | 3   | E |
| 11513500 | Chocolate milk, made from syrup with whole milk                   | 6000_Dairy | 29 | 24 | 5   | 2 | 2.5 | E |
| 11521000 | Milk, malted, unfortified, chocolate, made with milk              | 6000_Dairy | 28 | 30 | -2  | 4 | 3.5 | D |
| 11512510 | Hot chocolate, Puerto Rican style, made with low fat milk         | 6000_Dairy | 28 | 27 | 1   | 4 | 2.5 | E |
| 11541000 | Milk shake, NS as to flavor or type                               | 6000_Dairy | 28 | 27 | 1   | 3 | 1   | E |
| 11511550 | Chocolate milk, ready to drink, reduced sugar, NS as to milk      | 6000_Dairy | 28 | 26 | 2   | 4 | 4.5 | B |
| 11511100 | Chocolate milk, ready to drink, whole                             | 6000_Dairy | 27 | 28 | -1  | 4 | 2   | E |
| 11511400 | Chocolate milk, ready to drink, low fat                           | 6000_Dairy | 26 | 27 | -1  | 4 | 4   | C |
| 11511600 | Chocolate milk, ready to drink, low fat (Nesquik)                 | 6000_Dairy | 26 | 27 | -1  | 4 | 4   | C |
| 14502010 | Imitation cheese, American or cheddar type                        | 6000_Dairy | 25 | 27 | -2  | 4 | 4.5 | E |
| 11511610 | Chocolate milk, ready to drink, fat free (Nesquik)                | 6000_Dairy | 24 | 27 | -3  | 4 | 4.5 | C |
| 11542100 | Milk shake, fast food, chocolate                                  | 6000_Dairy | 24 | 24 | 0   | 4 | 1   | E |
| 11543000 | Milk shake, bottled, chocolate                                    | 6000_Dairy | 24 | 24 | 0   | 4 | 1   | E |
| 11512500 | Hot chocolate, Puerto Rican style, made with whole milk           | 6000_Dairy | 24 | 22 | 2   | 4 | 1.5 | E |

|          |                                                                                   |                |    |    |     |   |     |   |
|----------|-----------------------------------------------------------------------------------|----------------|----|----|-----|---|-----|---|
| 11531000 | Eggnog                                                                            | 6000_Dairy     | 24 | 19 | 5   | 4 | 3   | E |
| 11512030 | Hot chocolate / Cocoa, ready to drink, made with non-dairy milk                   | 6000_Dairy     | 23 | 38 | -15 | 4 | 2.5 | E |
| 11511000 | Chocolate milk, NFS                                                               | 6000_Dairy     | 23 | 26 | -3  | 4 | 4.5 | C |
| 11511300 | Chocolate milk, ready to drink, fat free                                          | 6000_Dairy     | 23 | 26 | -3  | 4 | 4.5 | C |
| 14410400 | Cheese, processed, Swiss                                                          | 6000_Dairy     | 23 | 18 | 5   | 4 | 2   | E |
| 14410100 | Cheese, American and Swiss blends                                                 | 6000_Dairy     | 23 | 17 | 6   | 4 | 0.5 | E |
| 14420000 | Cheese spread, NFS                                                                | 6000_Dairy     | 21 | 18 | 3   | 4 | 2   | E |
| 14420100 | Cheese spread, American or Cheddar cheese base                                    | 6000_Dairy     | 21 | 18 | 3   | 4 | 2   | E |
| 14420160 | Cheese spread, Swiss cheese base                                                  | 6000_Dairy     | 21 | 18 | 3   | 4 | 2   | E |
| 14420300 | Cheese spread, pressurized can                                                    | 6000_Dairy     | 21 | 18 | 3   | 4 | 2   | E |
| 11542000 | Carry-out milk shake, NS as to flavor                                             | 6000_Dairy     | 20 | 22 | -2  | 4 | 1.5 | E |
| 11542200 | Milk shake, fast food, flavors other than chocolate                               | 6000_Dairy     | 20 | 20 | 0   | 4 | 1.5 | E |
| 11543010 | Milk shake, bottled, flavors other than chocolate                                 | 6000_Dairy     | 20 | 20 | 0   | 4 | 1.5 | E |
| 11310000 | Milk, imitation, fluid, soy based                                                 | 6000_Dairy     | 19 | 28 | -9  | 4 | 4   | D |
| 11560000 | Chocolate milk drink                                                              | 6000_Dairy     | 18 | 27 | -9  | 4 | 3   | E |
| 14610200 | Cheese, cottage cheese, with gelatin dessert                                      | 6000_Dairy     | 18 | 13 | 5   | 3 | 4.5 | B |
| 11560020 | Flavored milk drink, whey- and milk-based, flavors other than chocolate           | 6000_Dairy     | 17 | 26 | -9  | 4 | 3   | E |
| 14410600 | Cheese, processed, with vegetables                                                | 6000_Dairy     | 17 | 9  | 8   | 4 | 2.5 | E |
| 11220100 | Milk, condensed, sweetened, undiluted                                             | 6000_Dairy     | 16 | 15 | 1   | 3 | 0.5 | E |
| 11220200 | Milk, condensed, sweetened, diluted                                               | 6000_Dairy     | 16 | 15 | 1   | 3 | 0.5 | E |
| 11512120 | Hot chocolate / Cocoa, ready to drink, made with non-dairy milk and whipped cream | 6000_Dairy     | 15 | 27 | -12 | 4 | 1.5 | E |
| 11340000 | Imitation milk, non-soy, sweetened                                                | 6000_Dairy     | 15 | 22 | -7  | 4 | 3.5 | C |
| 11220000 | Milk, condensed, sweetened                                                        | 6000_Dairy     | 15 | 13 | 2   | 3 | 0.5 | E |
| 11514100 | Hot chocolate / Cocoa, made with dry mix and water                                | 6000_Dairy     | 13 | 22 | -9  | 4 | 3   | E |
| 11512020 | Hot chocolate / Cocoa, ready to drink, made with nonfat milk                      | 6000_Dairy     | 11 | 19 | -8  | 4 | 3   | E |
| 42402010 | Coconut cream, canned, sweetened                                                  | 6000_Dairy     | 10 | 11 | -1  | 3 | 0.5 | E |
| 11512010 | Hot chocolate / Cocoa, ready to drink                                             | 6000_Dairy     | 9  | 11 | -2  | 4 | 2.5 | E |
| 11512110 | Hot chocolate / Cocoa, ready to drink, made with nonfat milk and whipped cream    | 6000_Dairy     | 8  | 11 | -3  | 4 | 2   | E |
| 11512100 | Hot chocolate / Cocoa, ready to drink, with whipped cream                         | 6000_Dairy     | 8  | 10 | -2  | 4 | 2   | E |
| 42401100 | Yogurt, coconut milk                                                              | 6000_Dairy     | 5  | 8  | -3  | 4 | 3   | C |
| 13120810 | Ice cream soda, chocolate                                                         | 6000_Dairy     | 1  | 6  | -5  | 4 | 1.5 | E |
| 13120800 | Ice cream soda, flavors other than chocolate                                      | 6000_Dairy     | 1  | 4  | -3  | 4 | 1.5 | E |
| 11370000 | Coconut milk                                                                      | 6000_Dairy     | 1  | 2  | -1  | 4 | 3   | C |
| 82105750 | Canola and soybean oil                                                            | 7000_Fats Oils | 78 | 85 | -7  | 2 | 3.5 | B |
| 82105800 | Canola, soybean and sunflower oil                                                 | 7000_Fats Oils | 78 | 85 | -7  | 2 | 3.5 | C |
| 82101000 | Vegetable oil, NFS                                                                | 7000_Fats Oils | 78 | 84 | -6  | 2 | 3   | B |
| 82105500 | Canola oil                                                                        | 7000_Fats Oils | 78 | 84 | -6  | 2 | 4   | B |
| 82108250 | Soybean and sunflower oil                                                         | 7000_Fats Oils | 78 | 83 | -5  | 2 | 3.5 | C |

|          |                                                                      |                |    |    |     |   |     |   |
|----------|----------------------------------------------------------------------|----------------|----|----|-----|---|-----|---|
| 82101300 | Almond oil                                                           | 7000_Fats Oils | 78 | 80 | -2  | 2 | 4   | B |
| 82104000 | Olive oil                                                            | 7000_Fats Oils | 78 | 80 | -2  | 2 | 3   | B |
| 82106000 | Safflower oil                                                        | 7000_Fats Oils | 78 | 80 | -2  | 2 | 4   | B |
| 82108500 | Sunflower oil                                                        | 7000_Fats Oils | 78 | 80 | -2  | 2 | 3.5 | C |
| 82102500 | Corn and canola oil                                                  | 7000_Fats Oils | 77 | 84 | -7  | 2 | 4   | B |
| 82102000 | Corn oil                                                             | 7000_Fats Oils | 77 | 80 | -3  | 2 | 3.5 | C |
| 82103500 | Flaxseed oil                                                         | 7000_Fats Oils | 76 | 83 | -7  | 2 | 4   | B |
| 82108700 | Walnut oil                                                           | 7000_Fats Oils | 76 | 83 | -7  | 2 | 4   | B |
| 82108000 | Soybean oil                                                          | 7000_Fats Oils | 76 | 82 | -6  | 2 | 3   | B |
| 82107000 | Sesame oil                                                           | 7000_Fats Oils | 76 | 78 | -2  | 2 | 3   | C |
| 82105000 | Peanut oil                                                           | 7000_Fats Oils | 73 | 74 | -1  | 2 | 3   | C |
| 82109000 | Wheat germ oil                                                       | 7000_Fats Oils | 72 | 77 | -5  | 2 | 2.5 | C |
| 82103000 | Cottonseed oil                                                       | 7000_Fats Oils | 65 | 64 | 1   | 2 | 1.5 | C |
| 83112980 | Celery seed dressing                                                 | 7000_Fats Oils | 55 | 58 | -3  | 2 | 1   | E |
| 81103100 | Margarine-like spread, stick, unsalted                               | 7000_Fats Oils | 54 | 67 | -13 | 4 | 4   | C |
| 81103120 | Margarine-like spread, tub, unsalted                                 | 7000_Fats Oils | 54 | 67 | -13 | 4 | 4   | C |
| 81104070 | Margarine-like spread, reduced calorie, about 20% fat, tub, unsalted | 7000_Fats Oils | 52 | 60 | -8  | 4 | 5   | B |
| 83105100 | Fruit dressing, made with honey, oil, and water                      | 7000_Fats Oils | 52 | 56 | -4  | 2 | 1.5 | D |
| 81103060 | Margarine, tub, unsalted                                             | 7000_Fats Oils | 49 | 61 | -12 | 4 | 3.5 | C |
| 81103070 | Margarine, whipped, tub, unsalted                                    | 7000_Fats Oils | 49 | 61 | -12 | 4 | 3.5 | C |
| 83208500 | Korean dressing or marinade                                          | 7000_Fats Oils | 48 | 49 | -1  | 2 | 0.5 | E |
| 81103030 | Margarine, stick, unsalted                                           | 7000_Fats Oils | 47 | 57 | -10 | 4 | 3.5 | C |
| 83112600 | Cream cheese dressing                                                | 7000_Fats Oils | 43 | 44 | -1  | 2 | 0.5 | E |
| 12310100 | Sour cream, regular                                                  | 7000_Fats Oils | 40 | 27 | 13  | 2 | 1   | D |
| 83103500 | Feta Cheese Dressing                                                 | 7000_Fats Oils | 39 | 45 | -6  | 4 | 1   | E |
| 12100100 | Cream, NS as to light, heavy, or half and half                       | 7000_Fats Oils | 39 | 28 | 11  | 2 | 2.5 | D |
| 12120100 | Cream, half and half                                                 | 7000_Fats Oils | 39 | 28 | 11  | 2 | 2.5 | D |
| 83112960 | Peppercorn Dressing                                                  | 7000_Fats Oils | 38 | 46 | -8  | 4 | 0.5 | E |
| 83100100 | Salad dressing, NFS, for salads                                      | 7000_Fats Oils | 37 | 47 | -10 | 4 | 1   | E |
| 83101600 | Bacon and tomato dressing                                            | 7000_Fats Oils | 37 | 47 | -10 | 4 | 1.5 | E |
| 83104000 | French or Catalina dressing                                          | 7000_Fats Oils | 37 | 47 | -10 | 4 | 1.5 | E |
| 83112500 | Creamy dressing                                                      | 7000_Fats Oils | 37 | 47 | -10 | 4 | 1   | E |
| 81102020 | Margarine, tub                                                       | 7000_Fats Oils | 37 | 46 | -9  | 4 | 3   | D |
| 81103035 | Margarine-oil blend, NFS                                             | 7000_Fats Oils | 37 | 46 | -9  | 4 | 3   | D |
| 81103080 | Margarine-oil blend, tub                                             | 7000_Fats Oils | 37 | 46 | -9  | 4 | 3   | D |
| 12110100 | Cream, light                                                         | 7000_Fats Oils | 37 | 23 | 14  | 2 | 2.5 | D |
| 81103090 | Butter replacement, liquid                                           | 7000_Fats Oils | 36 | 45 | -9  | 4 | 3   | D |
| 81103130 | Margarine like spread, whipped, tub, salted                          | 7000_Fats Oils | 36 | 45 | -9  | 4 | 3   | D |
| 83114000 | Thousand Island dressing                                             | 7000_Fats Oils | 36 | 45 | -9  | 4 | 1   | E |

|          |                                                                                      |                |    |    |    |   |     |   |
|----------|--------------------------------------------------------------------------------------|----------------|----|----|----|---|-----|---|
| 81102000 | Margarine, NFS                                                                       | 7000_Fats Oils | 36 | 44 | -8 | 4 | 3   | D |
| 83112000 | Avocado dressing                                                                     | 7000_Fats Oils | 34 | 43 | -9 | 4 | 1.5 | E |
| 81104011 | Margarine like spread, reduced calorie, about 40% fat, made with yogurt, tub, salted | 7000_Fats Oils | 33 | 40 | -7 | 4 | 4.5 | D |
| 81104010 | Margarine-oil blend, tub, light                                                      | 7000_Fats Oils | 32 | 41 | -9 | 4 | 4   | D |
| 81104020 | Margarine-oil blend, stick, light                                                    | 7000_Fats Oils | 32 | 41 | -9 | 4 | 4   | D |
| 83101000 | Blue or roquefort cheese dressing                                                    | 7000_Fats Oils | 32 | 41 | -9 | 4 | 1   | E |
| 83112990 | Sesame dressing                                                                      | 7000_Fats Oils | 32 | 41 | -9 | 4 | 1   | E |
| 81105030 | Butter-margarine blend, stick, unsalted                                              | 7000_Fats Oils | 32 | 38 | -6 | 4 | 2   | D |
| 83102000 | Caesar dressing                                                                      | 7000_Fats Oils | 32 | 37 | -5 | 4 | 0.5 | E |
| 14410380 | Cream cheese spread, fat free                                                        | 7000_Fats Oils | 32 | 33 | -1 | 4 | 4   | C |
| 81104110 | Margarine like spread, fat free, liquid, salted                                      | 7000_Fats Oils | 32 | 33 | -1 | 4 | 5   | D |
| 14303010 | Cream cheese, light                                                                  | 7000_Fats Oils | 32 | 22 | 10 | 3 | 0.5 | D |
| 81103020 | Margarine, whipped, tub, salted                                                      | 7000_Fats Oils | 30 | 38 | -8 | 4 | 2.5 | D |
| 81102030 | Margarine, liquid, salted                                                            | 7000_Fats Oils | 30 | 36 | -6 | 4 | 2.5 | D |
| 81102010 | Margarine, stick                                                                     | 7000_Fats Oils | 29 | 34 | -5 | 4 | 2   | D |
| 81103040 | Margarine-oil blend, stick                                                           | 7000_Fats Oils | 29 | 34 | -5 | 4 | 2   | D |
| 81104050 | Margarine like spread, reduced calorie, about 20% fat, tub, salted                   | 7000_Fats Oils | 29 | 32 | -3 | 4 | 5   | C |
| 81100000 | Table fat, NFS                                                                       | 7000_Fats Oils | 29 | 22 | 7  | 3 | 0.5 | E |
| 81103041 | Margarine-like spread, made with yogurt, stick, salted                               | 7000_Fats Oils | 28 | 33 | -5 | 4 | 3   | D |
| 12120105 | Cream, half and half, low fat                                                        | 7000_Fats Oils | 28 | 26 | 2  | 4 | 3.5 | D |
| 14301100 | Cream cheese, regular, flavored                                                      | 7000_Fats Oils | 28 | 18 | 10 | 3 | 0.5 | D |
| 14301010 | Cream cheese, regular, plain                                                         | 7000_Fats Oils | 27 | 13 | 14 | 3 | 0.5 | D |
| 81101100 | Butter, stick, unsalted                                                              | 7000_Fats Oils | 27 | 7  | 20 | 2 | 1   | E |
| 81101110 | Butter, whipped, tub, unsalted                                                       | 7000_Fats Oils | 27 | 7  | 20 | 2 | 1   | E |
| 83109000 | Russian dressing                                                                     | 7000_Fats Oils | 26 | 35 | -9 | 4 | 1   | E |
| 81203000 | Shortening, NS as to vegetable or animal                                             | 7000_Fats Oils | 26 | 29 | -3 | 4 | 1.5 | C |
| 22621100 | Fat back, cooked                                                                     | 7000_Fats Oils | 26 | 14 | 12 | 1 | 0.5 | E |
| 81204000 | Ghee, clarified butter                                                               | 7000_Fats Oils | 26 | 7  | 19 | 2 | 1   | E |
| 81201000 | Animal fat or drippings                                                              | 7000_Fats Oils | 24 | 13 | 11 | 2 | 0.5 | E |
| 83202000 | French dressing, low-calorie                                                         | 7000_Fats Oils | 23 | 31 | -8 | 4 | 2   | D |
| 83105500 | Honey mustard dressing                                                               | 7000_Fats Oils | 23 | 28 | -5 | 4 | 1.5 | E |
| 81104560 | Vegetable oil-butter spread, reduced calorie, tub, salted                            | 7000_Fats Oils | 23 | 26 | -3 | 4 | 3   | D |
| 83106000 | Italian dressing, made with vinegar and oil                                          | 7000_Fats Oils | 22 | 31 | -9 | 4 | 1.5 | E |
| 83205000 | Italian dressing, low calorie                                                        | 7000_Fats Oils | 22 | 30 | -8 | 4 | 2.5 | D |
| 83200100 | Salad dressing, light, NFS                                                           | 7000_Fats Oils | 22 | 28 | -6 | 4 | 2   | D |
| 83210100 | Creamy dressing, light                                                               | 7000_Fats Oils | 22 | 28 | -6 | 4 | 2   | D |
| 81105020 | Butter-margarine blend, tub, salted                                                  | 7000_Fats Oils | 22 | 27 | -5 | 4 | 2.5 | D |
| 81105500 | Butter-vegetable oil blend                                                           | 7000_Fats Oils | 22 | 27 | -5 | 4 | 2.5 | D |

|          |                                                                                                    |                |    |    |     |   |     |   |
|----------|----------------------------------------------------------------------------------------------------|----------------|----|----|-----|---|-----|---|
| 12120110 | Cream, half and half, fat free                                                                     | 7000_Fats Oils | 22 | 24 | -2  | 4 | 3.5 | D |
| 83202020 | French or Catalina dressing, light                                                                 | 7000_Fats Oils | 21 | 30 | -9  | 4 | 2   | D |
| 83201000 | Blue or roquefort cheese dressing, light                                                           | 7000_Fats Oils | 21 | 27 | -6  | 4 | 2   | D |
| 12310370 | Sour cream, fat free                                                                               | 7000_Fats Oils | 21 | 20 | 1   | 4 | 4.5 | A |
| 81100500 | Butter, NFS                                                                                        | 7000_Fats Oils | 21 | 5  | 16  | 2 | 0.5 | E |
| 81101000 | Butter, stick                                                                                      | 7000_Fats Oils | 21 | 5  | 16  | 2 | 0.5 | E |
| 81101010 | Butter, tub                                                                                        | 7000_Fats Oils | 21 | 4  | 17  | 2 | 0.5 | E |
| 83112950 | Poppy seed dressing                                                                                | 7000_Fats Oils | 20 | 29 | -9  | 4 | 0.5 | E |
| 83103000 | Coleslaw dressing                                                                                  | 7000_Fats Oils | 20 | 26 | -6  | 4 | 1   | E |
| 12120106 | Cream, half and half, flavored                                                                     | 7000_Fats Oils | 20 | 16 | 4   | 4 | 3   | D |
| 83105000 | Fruit dressing, made with fruit juice and cream                                                    | 7000_Fats Oils | 20 | 15 | 5   | 3 | 2   | D |
| 12310300 | Sour cream, reduced fat                                                                            | 7000_Fats Oils | 19 | 17 | 2   | 4 | 2.5 | D |
| 12310350 | Sour cream, light                                                                                  | 7000_Fats Oils | 19 | 17 | 2   | 4 | 3   | D |
| 12130100 | Cream, heavy                                                                                       | 7000_Fats Oils | 19 | 13 | 6   | 4 | 1   | D |
| 12130200 | Cream, heavy, whipped, unsweetened                                                                 | 7000_Fats Oils | 19 | 13 | 6   | 4 | 0.5 | D |
| 12210305 | Cream substitute, sugar free, liquid                                                               | 7000_Fats Oils | 18 | 17 | 1   | 4 | 3   | C |
| 83201050 | Blue or roquefort cheese dressing, reduced calorie                                                 | 7000_Fats Oils | 18 | 17 | 1   | 4 | 2.5 | D |
| 12320200 | Sour cream, filled, sour dressing, nonbutterfat                                                    | 7000_Fats Oils | 18 | 16 | 2   | 4 | 0.5 | D |
| 12210280 | Coffee creamer, liquid, fat free, sugar free, flavored                                             | 7000_Fats Oils | 17 | 17 | 0   | 4 | 3.5 | B |
| 12210310 | Coffee creamer, liquid, sugar free, flavored                                                       | 7000_Fats Oils | 17 | 17 | 0   | 4 | 3.5 | B |
| 83201200 | Blue or roquefort cheese dressing, reduced calorie, fat-free, cholesterol-free                     | 7000_Fats Oils | 17 | 15 | 2   | 4 | 2.5 | D |
| 83300100 | Blue or roquefort cheese dressing, fat free                                                        | 7000_Fats Oils | 17 | 15 | 2   | 4 | 2.5 | D |
| 12310200 | Sour cream, half and half                                                                          | 7000_Fats Oils | 17 | 14 | 3   | 4 | 2.5 | D |
| 12110300 | Cream, light, whipped, unsweetened                                                                 | 7000_Fats Oils | 17 | 11 | 6   | 4 | 0.5 | D |
| 83204500 | Honey mustard dressing, light                                                                      | 7000_Fats Oils | 16 | 27 | -11 | 4 | 2   | D |
| 81103140 | Margarine-like spread, tub, sweetened                                                              | 7000_Fats Oils | 16 | 21 | -5  | 4 | 3.5 | D |
| 14420210 | Cheese spread, cream cheese, light                                                                 | 7000_Fats Oils | 16 | 12 | 4   | 4 | 0.5 | D |
| 83207000 | Thousand Island dressing, light                                                                    | 7000_Fats Oils | 15 | 24 | -9  | 4 | 2   | D |
| 12140100 | Cream, whipped, pressurized container                                                              | 7000_Fats Oils | 15 | 11 | 4   | 4 | 0.5 | D |
| 12140105 | Cream, whipped, pressurized container, light                                                       | 7000_Fats Oils | 15 | 11 | 4   | 4 | 0.5 | D |
| 83206500 | Sesame dressing, light                                                                             | 7000_Fats Oils | 14 | 24 | -10 | 4 | 2   | D |
| 83210250 | Creamy dressing, made with sour cream and/or buttermilk and oil, reduced calorie, cholesterol-free | 7000_Fats Oils | 14 | 16 | -2  | 4 | 2   | D |
| 83112900 | Milk, vinegar, and sugar dressing                                                                  | 7000_Fats Oils | 14 | 14 | 0   | 2 | 3   | C |
| 83115000 | Yogurt dressing                                                                                    | 7000_Fats Oils | 14 | 14 | 0   | 4 | 2   | D |
| 81101510 | Light butter, stick, unsalted                                                                      | 7000_Fats Oils | 14 | 10 | 4   | 4 | 1.5 | E |
| 83205450 | Italian dressing, light                                                                            | 7000_Fats Oils | 13 | 24 | -11 | 4 | 2   | D |
| 82101500 | Coconut oil                                                                                        | 7000_Fats Oils | 13 | 3  | 10  | 2 | 1   | E |
| 81105010 | Butter-margarine blend, stick, salted                                                              | 7000_Fats Oils | 12 | 13 | -1  | 4 | 0.5 | E |

|          |                                                                                                              |                |    |    |     |   |     |   |
|----------|--------------------------------------------------------------------------------------------------------------|----------------|----|----|-----|---|-----|---|
| 12140000 | Cream, whipped                                                                                               | 7000_Fats Oils | 12 | 6  | 6   | 4 | 0.5 | D |
| 83301000 | Thousand Island dressing, fat free                                                                           | 7000_Fats Oils | 11 | 14 | -3  | 4 | 2.5 | D |
| 81104100 | Margarine like spread, fat free, tub, salted                                                                 | 7000_Fats Oils | 11 | 10 | 1   | 4 | 5   | D |
| 13251000 | Chantilly Cream                                                                                              | 7000_Fats Oils | 11 | 4  | 7   | 4 | 0.5 | D |
| 83201400 | Coleslaw dressing, light                                                                                     | 7000_Fats Oils | 10 | 19 | -9  | 4 | 0.5 | E |
| 12140110 | Whipped topping, dairy based, fat free, pressurized container                                                | 7000_Fats Oils | 10 | 17 | -7  | 4 | 3   | D |
| 83205500 | Italian dressing, reduced calorie, fat-free                                                                  | 7000_Fats Oils | 9  | 20 | -11 | 4 | 2   | D |
| 83300600 | Italian dressing, fat free                                                                                   | 7000_Fats Oils | 9  | 20 | -11 | 4 | 2   | D |
| 12220280 | Whipped topping, sugar free                                                                                  | 7000_Fats Oils | 9  | 5  | 4   | 4 | 0.5 | E |
| 14420200 | Cheese spread, cream cheese, regular                                                                         | 7000_Fats Oils | 9  | 2  | 7   | 4 | 0.5 | D |
| 12210210 | Coffee creamer, liquid, flavored                                                                             | 7000_Fats Oils | 8  | 18 | -10 | 4 | 2   | D |
| 83207100 | Thousand Island dressing, reduced calorie, fat-free, cholesterol-free                                        | 7000_Fats Oils | 8  | 12 | -4  | 4 | 2.5 | D |
| 12210500 | Cream substitute, sugar free, powder                                                                         | 7000_Fats Oils | 7  | 7  | 0   | 4 | 1   | E |
| 12210505 | Coffee creamer, powder, sugar free, flavored                                                                 | 7000_Fats Oils | 7  | 7  | 0   | 4 | 1   | E |
| 12320100 | Sour cream, imitation                                                                                        | 7000_Fats Oils | 7  | 7  | 0   | 4 | 0.5 | D |
| 81322000 | Honey butter                                                                                                 | 7000_Fats Oils | 7  | 1  | 6   | 2 | 1   | E |
| 12200100 | Coffee creamer, NFS                                                                                          | 7000_Fats Oils | 6  | 10 | -4  | 4 | 3   | C |
| 12210100 | Cream substitute, frozen                                                                                     | 7000_Fats Oils | 6  | 10 | -4  | 4 | 3   | C |
| 12210200 | Coffee creamer, liquid                                                                                       | 7000_Fats Oils | 6  | 10 | -4  | 4 | 3   | C |
| 12210520 | Coffee creamer, soy, liquid                                                                                  | 7000_Fats Oils | 6  | 10 | -4  | 4 | 3   | C |
| 83203000 | Caesar dressing, light                                                                                       | 7000_Fats Oils | 5  | 15 | -10 | 4 | 1.5 | E |
| 83300300 | Creamy dressing, fat free                                                                                    | 7000_Fats Oils | 4  | 3  | 1   | 4 | 2.5 | D |
| 83300900 | Salad dressing, fat free, NFS                                                                                | 7000_Fats Oils | 4  | 3  | 1   | 4 | 2.5 | D |
| 81101500 | Light butter, stick, salted                                                                                  | 7000_Fats Oils | 4  | 1  | 3   | 4 | 1   | E |
| 81101520 | Butter, light                                                                                                | 7000_Fats Oils | 4  | 1  | 3   | 4 | 1   | E |
| 81104550 | Butter-oil blend, light                                                                                      | 7000_Fats Oils | 4  | 1  | 3   | 4 | 1   | E |
| 83206000 | Russian dressing, light                                                                                      | 7000_Fats Oils | 3  | 14 | -11 | 4 | 2   | D |
| 12210400 | Coffee creamer, powder                                                                                       | 7000_Fats Oils | 3  | 4  | -1  | 4 | 1   | E |
| 81104490 | Butter-oil blend, NFS                                                                                        | 7000_Fats Oils | 3  | 1  | 2   | 4 | 0.5 | E |
| 81104510 | Butter-oil blend, tub                                                                                        | 7000_Fats Oils | 3  | 1  | 2   | 4 | 0.5 | E |
| 83210200 | Creamy dressing, made with sour cream and/or buttermilk and oil, reduced calorie, fat-free, cholesterol-free | 7000_Fats Oils | 2  | 3  | -1  | 4 | 2.5 | D |
| 81104500 | Butter-oil blend, stick                                                                                      | 7000_Fats Oils | 2  | 1  | 1   | 4 | 0.5 | E |
| 12210250 | Cream substitute, light, liquid                                                                              | 7000_Fats Oils | 1  | 8  | -7  | 4 | 3.5 | B |
| 12210255 | Cream substitute, light, flavored, liquid                                                                    | 7000_Fats Oils | 1  | 8  | -7  | 4 | 3.5 | B |
| 12210260 | Coffee creamer, liquid, fat free                                                                             | 7000_Fats Oils | 1  | 8  | -7  | 4 | 3.5 | B |
| 12210410 | Cream substitute, light, powdered                                                                            | 7000_Fats Oils | 1  | 4  | -3  | 4 | 0.5 | E |
| 12210430 | Coffee creamer, powder, fat free                                                                             | 7000_Fats Oils | 1  | 4  | -3  | 4 | 0.5 | E |
| 12210440 | Coffee creamer, powder, fat free, flavored                                                                   | 7000_Fats Oils | 1  | 4  | -3  | 4 | 0.5 | E |



|          |                                                                                                         |                |     |     |    |   |     |   |
|----------|---------------------------------------------------------------------------------------------------------|----------------|-----|-----|----|---|-----|---|
| 12210270 | Coffee creamer, liquid, fat free, flavored                                                              | 7000_Fats Oils | 1   | 2   | -1 | 4 | 2.5 | C |
| 12210420 | Coffee creamer, powder, flavored                                                                        | 7000_Fats Oils | 1   | 1   | 0  | 4 | 0.5 | E |
| 12220000 | Whipped topping, nondairy, NS as to canned, frozen, or made from powdered mix                           | 7000_Fats Oils | 1   | 1   | 0  | 4 | 0.5 | E |
| 12220100 | Whipped topping, nondairy, pressurized can                                                              | 7000_Fats Oils | 1   | 1   | 0  | 4 | 0.5 | E |
| 12220200 | Whipped topping                                                                                         | 7000_Fats Oils | 1   | 1   | 0  | 4 | 0.5 | E |
| 12220250 | Whipped topping, nondairy, frozen, lowfat                                                               | 7000_Fats Oils | 1   | 1   | 0  | 4 | 0.5 | E |
| 12220270 | Whipped topping, fat free                                                                               | 7000_Fats Oils | 1   | 1   | 0  | 4 | 0.5 | E |
| 12220300 | Whipped cream substitute, nondairy, made from powdered mix                                              | 7000_Fats Oils | 1   | 1   | 0  | 4 | 0.5 | D |
| 12220400 | Whipped cream substitute, nondairy, lowfat, low sugar, made from powdered mix                           | 7000_Fats Oils | 1   | 1   | 0  | 4 | 2.5 | D |
| 81106010 | Butter replacement, powder                                                                              | 7000_Fats Oils | 1   | 1   | 0  | 4 | 4   | E |
| 83101500 | Bacon dressing (hot)                                                                                    | 7000_Fats Oils | 1   | 1   | 0  | 2 | 1   | E |
| 83113000 | Sweet and sour dressing                                                                                 | 7000_Fats Oils | 1   | 1   | 0  | 4 | 3.5 | C |
| 83202010 | French dressing, reduced calorie, fat-free, cholesterol-free                                            | 7000_Fats Oils | 1   | 1   | 0  | 4 | 2.5 | D |
| 83208000 | Vinegar, sugar, and water dressing                                                                      | 7000_Fats Oils | 1   | 1   | 0  | 2 | 2   | D |
| 83210000 | Creamy dressing, made with sour cream and/or buttermilk and oil, diet, NS as to low or reduced calorie  | 7000_Fats Oils | 1   | 1   | 0  | 4 | 1   | E |
| 83210050 | Creamy dressing made with sour cream and/or buttermilk and oil, low calorie                             | 7000_Fats Oils | 1   | 1   | 0  | 4 | 1   | E |
| 83220000 | Salad dressing, low calorie, oil-free                                                                   | 7000_Fats Oils | 1   | 1   | 0  | 4 | 1.5 | E |
| 83300200 | Caesar dressing, fat free                                                                               | 7000_Fats Oils | 1   | 1   | 0  | 4 | 1.5 | D |
| 83300400 | French or Catalina dressing, fat free                                                                   | 7000_Fats Oils | 1   | 1   | 0  | 4 | 2.5 | D |
| 83300500 | Honey mustard dressing, fat free                                                                        | 7000_Fats Oils | 1   | 1   | 0  | 4 | 1.5 | E |
| 27151030 | Ceviche                                                                                                 | 8000_Mixed     | 100 | 100 | 0  | 1 | 4   | A |
| 27151070 | Stewed codfish, no potatoes, Puerto Rican style                                                         | 8000_Mixed     | 100 | 100 | 0  | 1 | 4.5 | A |
| 27351030 | Stewed codfish, Puerto Rican style                                                                      | 8000_Mixed     | 100 | 100 | 0  | 1 | 4.5 | A |
| 27450180 | Seafood garden salad with seafood, lettuce, vegetables excluding tomato and carrots, no dressing        | 8000_Mixed     | 100 | 100 | 0  | 2 | 4   | A |
| 27450190 | Seafood garden salad with seafood, lettuce, tomato and/or carrots, other vegetables, no dressing        | 8000_Mixed     | 100 | 100 | 0  | 2 | 4.5 | A |
| 27450200 | Seafood garden salad with seafood, lettuce, eggs, vegetables excluding tomato and carrots, no dressing  | 8000_Mixed     | 100 | 100 | 0  | 2 | 4   | A |
| 27450310 | Lomi salmon                                                                                             | 8000_Mixed     | 100 | 100 | 0  | 3 | 4   | A |
| 27450400 | Shrimp and vegetables including carrots, broccoli, and/or dark-green leafy; no potatoes, no sauce       | 8000_Mixed     | 100 | 100 | 0  | 2 | 4   | A |
| 27450740 | Fish and vegetables including carrots, broccoli, and/or dark-green leafy; no potatoes, soy-based sauce  | 8000_Mixed     | 100 | 100 | 0  | 2 | 4   | A |
| 63415100 | Soup, fruit                                                                                             | 8000_Mixed     | 100 | 100 | 0  | 2 | 4   | A |
| 72125500 | Channa Saag                                                                                             | 8000_Mixed     | 100 | 100 | 0  | 1 | 4.5 | A |
| 75146000 | Greek Salad, no dressing                                                                                | 8000_Mixed     | 100 | 100 | 0  | 2 | 4.5 | A |
| 75316010 | Zucchini with tomato sauce, cooked, fat not added in cooking                                            | 8000_Mixed     | 100 | 100 | 0  | 2 | 3.5 | B |
| 75440300 | Vegetable combinations, including carrots, broccoli, and/or dark-green leafy; cooked, with tomato sauce | 8000_Mixed     | 100 | 100 | 0  | 2 | 4   | A |

|          |                                                                                                                     |            |     |    |    |   |     |   |
|----------|---------------------------------------------------------------------------------------------------------------------|------------|-----|----|----|---|-----|---|
| 27450760 | Fish shish kabob with vegetables, excluding potatoes                                                                | 8000_Mixed | 100 | 99 | 1  | 1 | 4   | A |
| 27450210 | Seafood garden salad with seafood, lettuce, eggs, tomato and/or carrots, other vegetables, no dressing              | 8000_Mixed | 100 | 98 | 2  | 2 | 4   | A |
| 27450410 | Shrimp and vegetables including carrots, broccoli, and/or dark-green leafy; no potatoes, soy-based sauce            | 8000_Mixed | 100 | 98 | 2  | 2 | 4   | A |
| 27450600 | Shellfish mixture and vegetables including carrots, broccoli, and/or dark-green leafy; no potatoes, soy-based sauce | 8000_Mixed | 100 | 98 | 2  | 2 | 4   | A |
| 27450750 | Fish and vegetables excluding carrots, broccoli, and dark-green leafy; no potatoes, soy-based sauce                 | 8000_Mixed | 100 | 98 | 2  | 2 | 4   | A |
| 27451060 | Octopus salad, Puerto Rican style                                                                                   | 8000_Mixed | 100 | 98 | 2  | 2 | 4   | A |
| 27150100 | Shrimp curry                                                                                                        | 8000_Mixed | 100 | 97 | 3  | 1 | 4   | A |
| 27150330 | Mussels with tomato-based sauce                                                                                     | 8000_Mixed | 100 | 96 | 4  | 1 | 4   | B |
| 28350120 | Crab soup, tomato-base                                                                                              | 8000_Mixed | 100 | 96 | 4  | 1 | 3.5 | B |
| 27450405 | Shrimp and vegetables excluding carrots, broccoli, and dark-green leafy; no potatoes, no sauce                      | 8000_Mixed | 100 | 95 | 5  | 2 | 4   | A |
| 27450110 | Shrimp garden salad, shrimp, lettuce, eggs, tomato and/or carrots, other vegetables, no dressing                    | 8000_Mixed | 100 | 94 | 6  | 2 | 4   | A |
| 27450120 | Shrimp garden salad, shrimp, lettuce, eggs, vegetables excluding tomato and carrots, no dressing                    | 8000_Mixed | 100 | 94 | 6  | 2 | 4   | A |
| 27450430 | Shrimp shish kabob with vegetables, excluding potatoes                                                              | 8000_Mixed | 100 | 93 | 7  | 1 | 4   | A |
| 27450040 | Shrimp chow mein or chop suey, no noodles                                                                           | 8000_Mixed | 100 | 90 | 10 | 1 | 4   | A |
| 27450420 | Shrimp and vegetables excluding carrots, broccoli, and dark-green leafy; no potatoes, soy-based sauce               | 8000_Mixed | 99  | 93 | 6  | 2 | 4   | B |
| 28351110 | Fish and vegetable soup, no potatoes, Mexican style                                                                 | 8000_Mixed | 99  | 92 | 7  | 1 | 3.5 | A |
| 28355470 | Seafood soup with vegetables including carrots, broccoli, and/or dark-green leafy; no potatoes                      | 8000_Mixed | 99  | 92 | 7  | 1 | 3.5 | B |
| 28355480 | Seafood soup with vegetables excluding carrots, broccoli, and dark-green leafy; no potatoes                         | 8000_Mixed | 98  | 91 | 7  | 1 | 3.5 | B |
| 27151040 | Crabs in tomato-based sauce, Puerto Rican style                                                                     | 8000_Mixed | 98  | 90 | 8  | 2 | 3.5 | C |
| 28355450 | Seafood soup with potatoes and vegetables including carrots, broccoli, and/or dark-green leafy                      | 8000_Mixed | 98  | 90 | 8  | 1 | 3.5 | A |
| 27350110 | Bouillabaisse                                                                                                       | 8000_Mixed | 98  | 89 | 9  | 1 | 4   | A |
| 27450450 | Shrimp creole, no rice                                                                                              | 8000_Mixed | 98  | 89 | 9  | 2 | 4   | A |
| 41221020 | Chili with beans, without meat                                                                                      | 8000_Mixed | 97  | 97 | 0  | 3 | 4   | A |
| 27450610 | Shellfish mixture and vegetables excluding carrots, broccoli, and dark-green leafy; no potatoes, soy-based sauce    | 8000_Mixed | 97  | 92 | 5  | 2 | 4   | A |
| 73111400 | Carrots in tomato sauce                                                                                             | 8000_Mixed | 97  | 92 | 5  | 2 | 4   | B |
| 27450470 | Kung Pao shrimp                                                                                                     | 8000_Mixed | 97  | 90 | 7  | 2 | 4   | A |
| 27451030 | Lobster with sauce, Puerto Rican style                                                                              | 8000_Mixed | 97  | 89 | 8  | 2 | 3.5 | C |
| 28355460 | Seafood soup with potatoes, and vegetables excluding carrots, broccoli, and dark-green leafy                        | 8000_Mixed | 97  | 89 | 8  | 1 | 3.5 | A |
| 75232050 | Seaweed, prepared with soy sauce                                                                                    | 8000_Mixed | 96  | 90 | 6  | 1 | 3.5 | C |
| 72306000 | Watercress broth with shrimp                                                                                        | 8000_Mixed | 96  | 87 | 9  | 1 | 3.5 | B |
| 72125253 | Spinach, cooked, from canned, with cheese sauce                                                                     | 8000_Mixed | 95  | 99 | -4 | 2 | 3.5 | B |
| 27450700 | Fish and vegetables including carrots, broccoli, and/or dark-green leafy; no potatoes, tomato-based sauce           | 8000_Mixed | 95  | 96 | -1 | 2 | 3.5 | B |

|          |                                                                                                                                    |            |    |    |    |   |     |   |
|----------|------------------------------------------------------------------------------------------------------------------------------------|------------|----|----|----|---|-----|---|
| 58146672 | Pasta, whole grain, with tomato-based sauce, seafood, and added vegetables, home recipe                                            | 8000_Mixed | 95 | 92 | 3  | 2 | 4   | B |
| 27250060 | Gefilte fish                                                                                                                       | 8000_Mixed | 95 | 85 | 10 | 1 | 4   | A |
| 75316050 | Ratatouille                                                                                                                        | 8000_Mixed | 94 | 96 | -2 | 2 | 4.5 | A |
| 75306010 | Eggplant in tomato sauce, cooked, fat not added in cooking                                                                         | 8000_Mixed | 94 | 90 | 4  | 2 | 4.5 | A |
| 28351120 | Fish soup with potatoes, Mexican style                                                                                             | 8000_Mixed | 94 | 87 | 7  | 1 | 3.5 | A |
| 75604600 | Gazpacho                                                                                                                           | 8000_Mixed | 93 | 98 | -5 | 2 | 4   | A |
| 72307000 | Spinach soup                                                                                                                       | 8000_Mixed | 93 | 96 | -3 | 2 | 3.5 | A |
| 27251010 | Stewed salmon, Puerto Rican style                                                                                                  | 8000_Mixed | 93 | 89 | 4  | 2 | 4   | A |
| 72125251 | Spinach, cooked, from fresh, with cheese sauce                                                                                     | 8000_Mixed | 92 | 97 | -5 | 3 | 3.5 | B |
| 41311020 | Sambar, vegetable stew                                                                                                             | 8000_Mixed | 92 | 92 | 0  | 1 | 4   | A |
| 41603010 | Lentil soup, home recipe, canned, or ready-to-serve                                                                                | 8000_Mixed | 91 | 88 | 3  | 1 | 4   | A |
| 58146662 | Pasta, whole grain, with tomato-based sauce and seafood, home recipe                                                               | 8000_Mixed | 91 | 88 | 3  | 2 | 4   | B |
| 27446300 | Chicken or turkey garden salad, chicken and/or turkey, tomato and/or carrots, other vegetables, no dressing                        | 8000_Mixed | 91 | 87 | 4  | 1 | 4.5 | A |
| 75147000 | Spinach salad, no dressing                                                                                                         | 8000_Mixed | 91 | 87 | 4  | 2 | 4.5 | A |
| 27350310 | Seafood stew with potatoes and vegetables including carrots, broccoli, and/or dark-green leafy; tomato-based sauce                 | 8000_Mixed | 91 | 79 | 12 | 1 | 4   | A |
| 27250220 | Oyster fritter                                                                                                                     | 8000_Mixed | 90 | 90 | 0  | 3 | 3   | C |
| 27446360 | Chicken or turkey caesar garden salad, chicken and/or turkey, lettuce, tomato, cheese, no dressing                                 | 8000_Mixed | 90 | 89 | 1  | 1 | 4.5 | A |
| 27446310 | Chicken or turkey garden salad, chicken and/or turkey, other vegetables excluding tomato and carrots, no dressing                  | 8000_Mixed | 90 | 86 | 4  | 1 | 4.5 | A |
| 27350030 | Seafood stew with potatoes and vegetables excluding carrots, broccoli, and dark-green leafy; tomato-based sauce                    | 8000_Mixed | 90 | 79 | 11 | 2 | 4   | A |
| 27446355 | Asian chicken or turkey garden salad with crispy noodles, chicken and/or turkey, lettuce, fruit, nuts, crispy noodles, no dressing | 8000_Mixed | 89 | 88 | 1  | 1 | 4.5 | A |
| 27250040 | Crab cake                                                                                                                          | 8000_Mixed | 89 | 85 | 4  | 2 | 3.5 | C |
| 27260550 | Liver hash                                                                                                                         | 8000_Mixed | 89 | 83 | 6  | 1 | 4.5 | A |
| 27150310 | Fish with tomato-based sauce                                                                                                       | 8000_Mixed | 89 | 78 | 11 | 1 | 4   | A |
| 28355260 | Lobster gumbo                                                                                                                      | 8000_Mixed | 89 | 78 | 11 | 1 | 3.5 | A |
| 72125231 | Spinach, from fresh, creamed                                                                                                       | 8000_Mixed | 88 | 90 | -2 | 1 | 3.5 | B |
| 58146612 | Pasta, whole grain, with tomato-based sauce and added vegetables, home recipe                                                      | 8000_Mixed | 88 | 89 | -1 | 2 | 4   | B |
| 27445180 | Moo Goo Gai Pan                                                                                                                    | 8000_Mixed | 88 | 87 | 1  | 1 | 4.5 | A |
| 27450710 | Fish and vegetables excluding carrots, broccoli, and dark- green leafy; no potatoes, tomato-based sauce                            | 8000_Mixed | 88 | 87 | 1  | 2 | 3.5 | B |
| 28350310 | Turtle and vegetable soup                                                                                                          | 8000_Mixed | 88 | 83 | 5  | 1 | 3.5 | B |
| 72125310 | Palak Paneer                                                                                                                       | 8000_Mixed | 87 | 93 | -6 | 2 | 4   | A |
| 27250400 | Shrimp cake or patty                                                                                                               | 8000_Mixed | 87 | 81 | 6  | 2 | 4   | A |
| 27361010 | Stewed variety meats, mostly liver, Puerto Rican style                                                                             | 8000_Mixed | 87 | 80 | 7  | 1 | 4   | A |
| 72125252 | Spinach, cooked, from frozen, with cheese sauce                                                                                    | 8000_Mixed | 86 | 91 | -5 | 2 | 3.5 | C |
| 75403200 | Green beans, cooked, Szechuan-style                                                                                                | 8000_Mixed | 86 | 90 | -4 | 2 | 4.5 | A |

|          |                                                                                                             |            |    |    |    |   |     |   |
|----------|-------------------------------------------------------------------------------------------------------------|------------|----|----|----|---|-----|---|
| 27141500 | Chili con carne with chicken or turkey and beans                                                            | 8000_Mixed | 86 | 83 | 3  | 2 | 4   | A |
| 32101530 | Egg curry                                                                                                   | 8000_Mixed | 86 | 82 | 4  | 1 | 4   | A |
| 27460750 | Liver, beef or calves, and onions                                                                           | 8000_Mixed | 86 | 80 | 6  | 1 | 4   | A |
| 72125250 | Spinach, cooked, NS as to form, with cheese sauce                                                           | 8000_Mixed | 85 | 90 | -5 | 2 | 3.5 | C |
| 27450150 | Fish, tofu, and vegetables, tempura                                                                         | 8000_Mixed | 85 | 87 | -2 | 2 | 4   | B |
| 58146602 | Pasta, whole grain, with tomato-based sauce, home recipe                                                    | 8000_Mixed | 85 | 86 | -1 | 2 | 4   | B |
| 75201030 | Artichoke salad in oil                                                                                      | 8000_Mixed | 85 | 86 | -1 | 3 | 5   | A |
| 58161321 | Kidney beans and brown rice                                                                                 | 8000_Mixed | 85 | 85 | 0  | 1 | 4.5 | A |
| 58146652 | Pasta, whole grain, with tomato-based sauce, poultry, and added vegetables, home recipe                     | 8000_Mixed | 85 | 84 | 1  | 1 | 4   | B |
| 58161322 | Black beans and brown rice                                                                                  | 8000_Mixed | 85 | 84 | 1  | 1 | 4.5 | A |
| 58161323 | Pinto beans and brown rice                                                                                  | 8000_Mixed | 85 | 84 | 1  | 1 | 4.5 | A |
| 58161325 | Rice, brown, with beans and tomatoes                                                                        | 8000_Mixed | 85 | 84 | 1  | 1 | 4   | A |
| 72116140 | Caesar salad (with romaine)                                                                                 | 8000_Mixed | 85 | 81 | 4  | 2 | 4   | A |
| 75440100 | Vegetable combination, including carrots, broccoli, and/or dark-green leafy; cooked, with soy-based sauce   | 8000_Mixed | 84 | 89 | -5 | 2 | 3.5 | C |
| 27150320 | Fish curry                                                                                                  | 8000_Mixed | 84 | 86 | -2 | 2 | 3.5 | B |
| 58161320 | Beans and brown rice                                                                                        | 8000_Mixed | 84 | 84 | 0  | 1 | 4   | A |
| 75450600 | Vegetable combination, including carrots, broccoli, and/or dark-green leafy; cooked, with butter sauce      | 8000_Mixed | 84 | 84 | 0  | 2 | 4   | A |
| 27250128 | Shrimp and noodles with soy-based sauce                                                                     | 8000_Mixed | 84 | 75 | 9  | 2 | 3.5 | B |
| 72125232 | Spinach, from frozen, creamed                                                                               | 8000_Mixed | 83 | 85 | -2 | 1 | 4   | B |
| 58132350 | Spaghetti with tomato sauce, meatless, whole wheat noodles                                                  | 8000_Mixed | 83 | 84 | -1 | 2 | 3.5 | C |
| 58146310 | Pasta, whole wheat, with tomato sauce, meatless                                                             | 8000_Mixed | 83 | 84 | -1 | 2 | 3.5 | C |
| 75439500 | Chow mein or chop suey, meatless, no noodles                                                                | 8000_Mixed | 83 | 84 | -1 | 1 | 4   | A |
| 41601080 | Pinto bean soup, home recipe, canned or ready-to-serve                                                      | 8000_Mixed | 83 | 79 | 4  | 1 | 5   | A |
| 27150350 | Sardines with tomato-based sauce                                                                            | 8000_Mixed | 83 | 77 | 6  | 3 | 4   | B |
| 27150370 | Sardines with mustard sauce                                                                                 | 8000_Mixed | 83 | 77 | 6  | 3 | 4   | B |
| 41812500 | Tofu and vegetables including carrots, broccoli, and/or dark-green leafy; no potatoes, with soy-based sauce | 8000_Mixed | 82 | 88 | -6 | 2 | 3.5 | B |
| 27450010 | Crab salad                                                                                                  | 8000_Mixed | 82 | 84 | -2 | 3 | 3   | C |
| 58175000 | Vada, fried dumpling                                                                                        | 8000_Mixed | 82 | 83 | -1 | 1 | 5   | A |
| 27450020 | Lobster salad                                                                                               | 8000_Mixed | 82 | 82 | 0  | 3 | 3   | C |
| 27250070 | Salmon cake or patty                                                                                        | 8000_Mixed | 82 | 80 | 2  | 3 | 3.5 | D |
| 27250160 | Tuna cake or patty                                                                                          | 8000_Mixed | 82 | 79 | 3  | 3 | 3.5 | B |
| 75417030 | Peas, cooked, NS as to form, with tomato sauce                                                              | 8000_Mixed | 82 | 76 | 6  | 1 | 4.5 | A |
| 75417032 | Peas, cooked, from frozen, with tomato sauce                                                                | 8000_Mixed | 82 | 76 | 6  | 1 | 4.5 | A |
| 27250250 | Flounder with crab stuffing                                                                                 | 8000_Mixed | 82 | 73 | 9  | 2 | 4   | B |
| 27451010 | Fried fish with sauce, Puerto Rican style                                                                   | 8000_Mixed | 82 | 72 | 10 | 2 | 3.5 | C |
| 27150030 | Crab imperial                                                                                               | 8000_Mixed | 82 | 71 | 11 | 2 | 3.5 | C |
| 28160810 | Livers, chicken, with vegetable (diet frozen meal)                                                          | 8000_Mixed | 81 | 86 | -5 | 4 | 4.5 | A |

|          |                                                                                                                        |            |    |    |    |   |     |   |
|----------|------------------------------------------------------------------------------------------------------------------------|------------|----|----|----|---|-----|---|
| 41601050 | Soybean soup, made with milk                                                                                           | 8000_Mixed | 81 | 84 | -3 | 1 | 3.5 | B |
| 27445125 | Chicken or turkey and vegetables including carrots, broccoli, and/or dark-green leafy; no potatoes, tomato-based sauce | 8000_Mixed | 81 | 83 | -2 | 2 | 3.5 | B |
| 58146642 | Pasta, whole grain, with tomato-based sauce and poultry, home recipe                                                   | 8000_Mixed | 81 | 80 | 1  | 1 | 4   | B |
| 58161474 | Rice, brown, with dark green vegetables, fat added                                                                     | 8000_Mixed | 81 | 80 | 1  | 1 | 3.5 | B |
| 58161494 | Rice, brown, with dark green vegetables and tomatoes and/or tomato-based sauce, fat added                              | 8000_Mixed | 81 | 80 | 1  | 1 | 3.5 | B |
| 27446350 | Asian chicken or turkey garden salad, chicken and/or turkey, lettuce, fruit, nuts, no dressing                         | 8000_Mixed | 81 | 79 | 2  | 1 | 4.5 | A |
| 27351010 | Codfish with starchy vegetables, Puerto Rican style                                                                    | 8000_Mixed | 81 | 78 | 3  | 2 | 5   | A |
| 75440310 | Vegetable combinations, excluding carrots, broccoli, and dark-green leafy; cooked, with tomato sauce                   | 8000_Mixed | 81 | 76 | 5  | 1 | 4   | A |
| 75148010 | Cobb salad, no dressing                                                                                                | 8000_Mixed | 81 | 74 | 7  | 1 | 4   | A |
| 27351060 | Shrimp and pasta garden salad (shrimp, pasta salad, tomato and/or carrots, other vegetables), no dressing              | 8000_Mixed | 81 | 73 | 8  | 2 | 4   | A |
| 75647000 | Seaweed soup                                                                                                           | 8000_Mixed | 81 | 72 | 9  | 2 | 3   | C |
| 28355440 | Shrimp gumbo                                                                                                           | 8000_Mixed | 81 | 68 | 13 | 2 | 3.5 | B |
| 41812450 | Vegetarian chili, made with meat substitute                                                                            | 8000_Mixed | 80 | 89 | -9 | 4 | 5   | A |
| 58161470 | Rice, brown, with dark green vegetables, NS as to fat                                                                  | 8000_Mixed | 80 | 80 | 0  | 1 | 3.5 | B |
| 27351040 | Biscayne codfish, Puerto Rican style                                                                                   | 8000_Mixed | 80 | 77 | 3  | 2 | 4   | A |
| 27450650 | Shellfish mixture and vegetables including carrots, broccoli, and/or dark-green leafy; no potatoes, mushroom sauce     | 8000_Mixed | 80 | 77 | 3  | 3 | 3.5 | C |
| 27351050 | Codfish salad, Puerto Rican style (Ensalada de bacalao)                                                                | 8000_Mixed | 80 | 76 | 4  | 2 | 4   | B |
| 28350040 | Fish stock, home recipe                                                                                                | 8000_Mixed | 80 | 69 | 11 | 1 | 3.5 | B |
| 27150410 | Shrimp teriyaki                                                                                                        | 8000_Mixed | 80 | 68 | 12 | 1 | 4   | B |
| 41601070 | Soybean soup, miso broth                                                                                               | 8000_Mixed | 79 | 80 | -1 | 3 | 3   | C |
| 72125233 | Spinach, from canned, creamed                                                                                          | 8000_Mixed | 79 | 80 | -1 | 1 | 3.5 | C |
| 58161435 | Rice, brown, with carrots, NS as to fat                                                                                | 8000_Mixed | 79 | 78 | 1  | 1 | 3.5 | C |
| 58161439 | Rice, brown, with carrots, fat added                                                                                   | 8000_Mixed | 79 | 78 | 1  | 1 | 3.5 | C |
| 58161490 | Rice, brown, with dark green vegetables and tomatoes and/or tomato-based sauce, NS as to fat                           | 8000_Mixed | 79 | 78 | 1  | 1 | 3.5 | B |
| 27250210 | Clam cake or patty                                                                                                     | 8000_Mixed | 79 | 77 | 2  | 3 | 3.5 | C |
| 27450067 | Tuna salad, made with light Italian dressing                                                                           | 8000_Mixed | 79 | 77 | 2  | 3 | 3.5 | B |
| 41812510 | Tofu and vegetables excluding carrots, broccoli, and dark-green leafy; no potatoes, with soy-based sauce               | 8000_Mixed | 78 | 83 | -5 | 2 | 3.5 | B |
| 75440110 | Vegetable combination, excluding carrots, broccoli, and dark-green leafy; cooked, with soy-based sauce                 | 8000_Mixed | 78 | 83 | -5 | 2 | 3.5 | C |
| 58146601 | Pasta, whole grain, with tomato-based sauce, restaurant                                                                | 8000_Mixed | 78 | 81 | -3 | 2 | 3.5 | C |
| 27420100 | Pork, tofu, and vegetables including carrots, broccoli, and/or dark-green leafy; no potatoes, soy-base sauce           | 8000_Mixed | 78 | 80 | -2 | 2 | 4   | B |
| 41311030 | Lentil curry                                                                                                           | 8000_Mixed | 78 | 80 | -2 | 2 | 4   | A |
| 75401011 | Asparagus, from fresh, creamed or with cheese sauce                                                                    | 8000_Mixed | 78 | 79 | -1 | 2 | 3.5 | B |
| 58161464 | Rice, brown, with tomatoes and/or tomato based sauce, fat added                                                        | 8000_Mixed | 78 | 78 | 0  | 1 | 3.5 | C |
| 58161510 | Grape leaves stuffed with rice                                                                                         | 8000_Mixed | 78 | 78 | 0  | 2 | 4.5 | A |

|          |                                                                                                                              |            |    |    |    |   |     |   |
|----------|------------------------------------------------------------------------------------------------------------------------------|------------|----|----|----|---|-----|---|
| 58175110 | Tabbouleh                                                                                                                    | 8000_Mixed | 78 | 78 | 0  | 2 | 3   | C |
| 75401010 | Asparagus, NS as to form, creamed or with cheese sauce                                                                       | 8000_Mixed | 78 | 78 | 0  | 2 | 3.5 | B |
| 58161460 | Rice, brown, with tomatoes and/or tomato based sauce, NS as to fat                                                           | 8000_Mixed | 78 | 77 | 1  | 1 | 3.5 | C |
| 58161480 | Rice, brown, with carrots and tomatoes and/or tomato-based sauce, NS as to fat                                               | 8000_Mixed | 78 | 77 | 1  | 1 | 3.5 | C |
| 58161484 | Rice, brown, with carrots and tomatoes and/or tomato-based sauce, fat added                                                  | 8000_Mixed | 78 | 77 | 1  | 1 | 3.5 | C |
| 58161500 | Rice, brown, with carrots and dark green vegetables, NS as to fat                                                            | 8000_Mixed | 78 | 77 | 1  | 1 | 3.5 | B |
| 58161504 | Rice, brown, with carrots and dark green vegetables, fat added                                                               | 8000_Mixed | 78 | 77 | 1  | 1 | 3.5 | B |
| 58161520 | Rice, brown, with carrots, dark green vegetables, and tomatoes and/or tomato-based sauce, NS as to fat                       | 8000_Mixed | 78 | 77 | 1  | 1 | 3.5 | C |
| 58161524 | Rice, brown, with carrots, dark green vegetables, and tomatoes and/or tomato-based sauce, fat added                          | 8000_Mixed | 78 | 77 | 1  | 1 | 3.5 | C |
| 58161472 | Rice, brown, with dark green vegetables, no added fat                                                                        | 8000_Mixed | 78 | 76 | 2  | 1 | 3.5 | B |
| 58146632 | Pasta, whole grain, with tomato-based sauce, meat, and added vegetables, home recipe                                         | 8000_Mixed | 78 | 75 | 3  | 1 | 4   | B |
| 75601200 | Cabbage soup, home recipe, canned or ready-to-serve                                                                          | 8000_Mixed | 78 | 75 | 3  | 2 | 3.5 | B |
| 28340150 | Mexican style chicken broth soup stock                                                                                       | 8000_Mixed | 78 | 74 | 4  | 1 | 4   | B |
| 27450250 | Oysters Rockefeller                                                                                                          | 8000_Mixed | 78 | 71 | 7  | 2 | 3   | C |
| 28355350 | Salmon soup, cream style                                                                                                     | 8000_Mixed | 78 | 70 | 8  | 2 | 3.5 | B |
| 28350110 | Crab soup, NS as to tomato-base or cream style                                                                               | 8000_Mixed | 78 | 68 | 10 | 1 | 3.5 | B |
| 28355210 | Crab soup, cream of, prepared with milk                                                                                      | 8000_Mixed | 78 | 68 | 10 | 1 | 3.5 | B |
| 75141025 | Cabbage salad or coleslaw, made with light Italian dressing                                                                  | 8000_Mixed | 77 | 80 | -3 | 3 | 4   | A |
| 27415110 | Beef and broccoli                                                                                                            | 8000_Mixed | 77 | 79 | -2 | 2 | 4   | A |
| 27450080 | Seafood salad                                                                                                                | 8000_Mixed | 77 | 77 | 0  | 4 | 3   | D |
| 75401012 | Asparagus, from frozen, creamed or with cheese sauce                                                                         | 8000_Mixed | 77 | 77 | 0  | 2 | 3.5 | B |
| 27450063 | Tuna salad, made with light mayonnaise-type salad dressing                                                                   | 8000_Mixed | 77 | 76 | 1  | 3 | 3.5 | B |
| 27341510 | Chicken or turkey stew with potatoes and vegetables including carrots, broccoli, and/or dark-green leafy; tomato-based sauce | 8000_Mixed | 77 | 72 | 5  | 1 | 4   | A |
| 27441120 | Chicken or turkey creole, without rice                                                                                       | 8000_Mixed | 77 | 71 | 6  | 1 | 4   | A |
| 27150250 | Fish moochim                                                                                                                 | 8000_Mixed | 77 | 68 | 9  | 2 | 0.5 | E |
| 27250410 | Shrimp with crab stuffing                                                                                                    | 8000_Mixed | 77 | 66 | 11 | 2 | 3.5 | C |
| 28355250 | Lobster bisque                                                                                                               | 8000_Mixed | 77 | 66 | 11 | 1 | 3.5 | B |
| 32105200 | Egg foo yung, NFS                                                                                                            | 8000_Mixed | 77 | 64 | 13 | 1 | 4   | B |
| 32105230 | Shrimp egg foo yung                                                                                                          | 8000_Mixed | 77 | 64 | 13 | 1 | 4   | B |
| 58146641 | Pasta, whole grain, with tomato-based sauce and poultry, restaurant                                                          | 8000_Mixed | 76 | 79 | -3 | 2 | 3.5 | C |
| 27415120 | Beef, tofu, and vegetables including carrots, broccoli, and/or dark-green leafy; no potatoes, soy-based sauce                | 8000_Mixed | 76 | 77 | -1 | 2 | 4   | A |
| 27420400 | Pork and vegetables including carrots, broccoli, and/or dark-green leafy; no potatoes, tomato-based sauce                    | 8000_Mixed | 76 | 76 | 0  | 2 | 3.5 | B |
| 27450061 | Tuna salad, made with light mayonnaise                                                                                       | 8000_Mixed | 76 | 76 | 0  | 3 | 3.5 | B |
| 27411100 | Beef with vegetables including carrots, broccoli, and/or dark-green leafy; no potatoes, tomato-based sauce                   | 8000_Mixed | 76 | 75 | 1  | 2 | 4   | B |

|          |                                                                                                                                                        |            |    |    |    |   |     |   |
|----------|--------------------------------------------------------------------------------------------------------------------------------------------------------|------------|----|----|----|---|-----|---|
| 27446330 | Chicken or turkey garden salad with cheese, chicken and/or turkey, cheese, lettuce and/or greens, tomato and/or carrots, other vegetables, no dressing | 8000_Mixed | 76 | 75 | 1  | 2 | 4   | A |
| 58146622 | Pasta, whole grain, with tomato-based sauce and meat, home recipe                                                                                      | 8000_Mixed | 76 | 75 | 1  | 1 | 4   | B |
| 58161437 | Rice, brown, with carrots, no added fat                                                                                                                | 8000_Mixed | 76 | 73 | 3  | 1 | 3.5 | C |
| 58161482 | Rice, brown, with carrots and tomatoes and/or tomato-based sauce, no added fat                                                                         | 8000_Mixed | 76 | 73 | 3  | 1 | 3.5 | C |
| 58161492 | Rice, brown, with dark green vegetables and tomatoes and/or tomato-based sauce, no added fat                                                           | 8000_Mixed | 76 | 73 | 3  | 1 | 3.5 | B |
| 58161502 | Rice, brown, with carrots and dark green vegetables, no added fat                                                                                      | 8000_Mixed | 76 | 73 | 3  | 1 | 3.5 | B |
| 75649110 | Vegetable soup, home recipe                                                                                                                            | 8000_Mixed | 76 | 73 | 3  | 2 | 3.5 | B |
| 27241000 | Chicken or turkey hash                                                                                                                                 | 8000_Mixed | 76 | 72 | 4  | 1 | 4.5 | A |
| 77316600 | Eggplant and meat casserole                                                                                                                            | 8000_Mixed | 76 | 70 | 6  | 1 | 4   | A |
| 75302080 | Bean salad, yellow and/or green string beans                                                                                                           | 8000_Mixed | 75 | 79 | -4 | 2 | 4   | B |
| 27550200 | Fish sandwich, from school cafeteria                                                                                                                   | 8000_Mixed | 75 | 76 | -1 | 3 | 4   | A |
| 75141035 | Cabbage salad or coleslaw, made with light creamy dressing                                                                                             | 8000_Mixed | 75 | 75 | 0  | 3 | 4   | A |
| 75401013 | Asparagus, from canned, creamed or with cheese sauce                                                                                                   | 8000_Mixed | 75 | 75 | 0  | 2 | 3.5 | C |
| 41601200 | Liquid from stewed kidney beans, Puerto Rican style                                                                                                    | 8000_Mixed | 75 | 74 | 1  | 1 | 3.5 | B |
| 58161440 | Rice, brown, with peas and carrots, NS as to fat                                                                                                       | 8000_Mixed | 75 | 74 | 1  | 1 | 3.5 | B |
| 58161444 | Rice, brown, with peas and carrots, fat added                                                                                                          | 8000_Mixed | 75 | 74 | 1  | 1 | 3.5 | B |
| 58161530 | Rice, brown, with other vegetables, NS as to fat                                                                                                       | 8000_Mixed | 75 | 73 | 2  | 1 | 3.5 | B |
| 58161534 | Rice, brown, with other vegetables, fat added                                                                                                          | 8000_Mixed | 75 | 73 | 2  | 1 | 3.5 | B |
| 58161462 | Rice, brown, with tomatoes and/or tomato based sauce, no added fat                                                                                     | 8000_Mixed | 75 | 72 | 3  | 1 | 3.5 | C |
| 58161522 | Rice, brown, with carrots, dark green vegetables, and tomatoes and/or tomato-based sauce, no added fat                                                 | 8000_Mixed | 75 | 72 | 3  | 1 | 3.5 | B |
| 28340580 | Chicken or turkey soup with vegetables, broccoli, carrots, celery, potatoes and onions, Asian style                                                    | 8000_Mixed | 75 | 71 | 4  | 1 | 3.5 | C |
| 58161402 | Rice, brown, with vegetables (including carrots, broccoli, and/or dark-green leafy), no sauce, fat not added in cooking                                | 8000_Mixed | 75 | 71 | 4  | 1 | 3.5 | C |
| 58403100 | Noodle and potato soup, Puerto Rican style                                                                                                             | 8000_Mixed | 75 | 70 | 5  | 1 | 3.5 | B |
| 27136100 | Chili con carne with venison/deer and beans                                                                                                            | 8000_Mixed | 75 | 69 | 6  | 2 | 4.5 | A |
| 27341520 | Chicken or turkey stew with potatoes and vegetables excluding carrots, broccoli, and dark-green leafy; tomato-based sauce                              | 8000_Mixed | 75 | 69 | 6  | 1 | 4.5 | A |
| 27350040 | Shad creole, with rice                                                                                                                                 | 8000_Mixed | 75 | 65 | 10 | 1 | 3.5 | C |
| 27350050 | Shrimp chow mein or chop suey with noodles                                                                                                             | 8000_Mixed | 75 | 63 | 12 | 1 | 4   | B |
| 27450064 | Tuna salad, made with creamy dressing                                                                                                                  | 8000_Mixed | 74 | 77 | -3 | 4 | 3.5 | C |
| 75440600 | Vegetable curry                                                                                                                                        | 8000_Mixed | 74 | 77 | -3 | 2 | 3.5 | B |
| 27450066 | Tuna salad, made with Italian dressing                                                                                                                 | 8000_Mixed | 74 | 75 | -1 | 3 | 3.5 | C |
| 27445130 | Chicken or turkey and vegetables excluding carrots, broccoli, and dark-green leafy; no potatoes, tomato-based sauce                                    | 8000_Mixed | 74 | 74 | 0  | 2 | 3.5 | B |
| 27450062 | Tuna salad, made with mayonnaise-type salad dressing                                                                                                   | 8000_Mixed | 74 | 74 | 0  | 4 | 3.5 | C |
| 58146300 | Pasta, whole wheat, with meat sauce                                                                                                                    | 8000_Mixed | 74 | 73 | 1  | 1 | 3.5 | B |

|          |                                                                                                                                                                                  |            |    |    |    |   |     |   |
|----------|----------------------------------------------------------------------------------------------------------------------------------------------------------------------------------|------------|----|----|----|---|-----|---|
| 58161400 | Rice, brown, with vegetables (including carrots, broccoli, and/or dark-green leafy), no sauce, NS as to fat added in cooking                                                     | 8000_Mixed | 74 | 73 | 1  | 1 | 3.5 | C |
| 58161404 | Rice, brown, with vegetables (including carrots, broccoli, and/or dark-green leafy), no sauce, fat added in cooking                                                              | 8000_Mixed | 74 | 73 | 1  | 1 | 3.5 | C |
| 75612010 | Zucchini soup, cream of, prepared with milk                                                                                                                                      | 8000_Mixed | 74 | 73 | 1  | 1 | 3.5 | B |
| 27120160 | Pork curry                                                                                                                                                                       | 8000_Mixed | 74 | 72 | 2  | 1 | 3.5 | B |
| 58160800 | Rice, white, with lentils, NS as to fat                                                                                                                                          | 8000_Mixed | 74 | 72 | 2  | 1 | 4   | A |
| 58160805 | Rice, white, with lentils, fat added                                                                                                                                             | 8000_Mixed | 74 | 72 | 2  | 1 | 4   | A |
| 58161310 | Rice, brown, with tomato sauce                                                                                                                                                   | 8000_Mixed | 74 | 72 | 2  | 1 | 3   | C |
| 58161430 | Rice, brown, with peas, NS as to fat                                                                                                                                             | 8000_Mixed | 74 | 72 | 2  | 1 | 3.5 | B |
| 58161434 | Rice, brown, with peas, fat added                                                                                                                                                | 8000_Mixed | 74 | 72 | 2  | 1 | 3.5 | B |
| 27451070 | Codfish salad, Puerto Rican style, Serenata                                                                                                                                      | 8000_Mixed | 74 | 71 | 3  | 2 | 3   | C |
| 58161452 | Rice, brown, with tomatoes, fat not added in cooking                                                                                                                             | 8000_Mixed | 74 | 70 | 4  | 1 | 3.5 | C |
| 28310160 | Beef broth, with tomato, home recipe                                                                                                                                             | 8000_Mixed | 73 | 77 | -4 | 2 | 3.5 | C |
| 27540240 | Chicken fillet, broiled, sandwich, on whole wheat roll, with lettuce, tomato and spread                                                                                          | 8000_Mixed | 73 | 75 | -2 | 3 | 4   | B |
| 28150210 | Haddock with chopped spinach, diet frozen meal                                                                                                                                   | 8000_Mixed | 73 | 73 | 0  | 4 | 4   | A |
| 27445120 | Chicken or turkey and vegetables excluding carrots, broccoli, and dark-green leafy; no potatoes, soy-based sauce                                                                 | 8000_Mixed | 73 | 72 | 1  | 2 | 4   | B |
| 58132360 | Spaghetti with tomato sauce and meatballs, whole wheat noodles or spaghetti with meat sauce, whole wheat noodles or spaghetti with meat sauce and meatballs, whole wheat noodles | 8000_Mixed | 73 | 72 | 1  | 2 | 3.5 | C |
| 27445110 | Chicken or turkey and vegetables including carrots, broccoli, and/or dark-green leafy; no potatoes, soy-based sauce                                                              | 8000_Mixed | 73 | 71 | 2  | 1 | 3.5 | B |
| 58160150 | Kidney beans and white rice                                                                                                                                                      | 8000_Mixed | 73 | 71 | 2  | 1 | 4   | A |
| 27450068 | Tuna salad, made with any type of fat free dressing                                                                                                                              | 8000_Mixed | 73 | 70 | 3  | 3 | 3.5 | B |
| 58160156 | Pinto beans and white rice                                                                                                                                                       | 8000_Mixed | 73 | 70 | 3  | 1 | 4   | A |
| 27450660 | Shellfish mixture and vegetables excluding carrots, broccoli, and dark-green leafy; no potatoes, mushroom sauce                                                                  | 8000_Mixed | 73 | 69 | 4  | 2 | 3.5 | C |
| 75601210 | Cabbage with meat soup, home recipe, canned or ready-to-serve                                                                                                                    | 8000_Mixed | 73 | 69 | 4  | 1 | 3.5 | B |
| 75651000 | Minestrone soup, home recipe                                                                                                                                                     | 8000_Mixed | 73 | 69 | 4  | 1 | 4   | B |
| 27151050 | Shrimp in garlic sauce, Puerto Rican style                                                                                                                                       | 8000_Mixed | 73 | 68 | 5  | 2 | 3   | D |
| 27150010 | Fish with cream or white sauce, not tuna or lobster                                                                                                                              | 8000_Mixed | 73 | 61 | 12 | 1 | 4   | A |
| 58134310 | Stuffed shells, with fish and/or shellfish, with tomato sauce                                                                                                                    | 8000_Mixed | 73 | 59 | 14 | 1 | 4   | B |
| 73101110 | Carrots, raw, salad                                                                                                                                                              | 8000_Mixed | 72 | 77 | -5 | 3 | 3.5 | C |
| 27450030 | Salmon salad                                                                                                                                                                     | 8000_Mixed | 72 | 76 | -4 | 4 | 3   | C |
| 28340130 | Chicken or turkey broth, with tomato, home recipe                                                                                                                                | 8000_Mixed | 72 | 76 | -4 | 2 | 3.5 | C |
| 27420370 | Pork, tofu, and vegetables, excluding carrots, broccoli, and dark-green leafy; no potatoes, soy-based sauce                                                                      | 8000_Mixed | 72 | 74 | -2 | 2 | 3.5 | B |
| 27341055 | Chicken or turkey, potatoes, and vegetables including carrots, broccoli, and/or dark-green leafy; tomato-based sauce                                                             | 8000_Mixed | 72 | 72 | 0  | 2 | 4   | B |
| 27330170 | Stuffed grape leaves with lamb and rice                                                                                                                                          | 8000_Mixed | 72 | 71 | 1  | 1 | 4.5 | A |
| 28150220 | Flounder with chopped broccoli, diet frozen meal                                                                                                                                 | 8000_Mixed | 72 | 71 | 1  | 4 | 4   | A |
| 58161450 | Rice, brown, with tomatoes, NS as to fat added in cooking                                                                                                                        | 8000_Mixed | 72 | 71 | 1  | 1 | 3.5 | C |



|          |                                                                                                                           |            |    |    |    |   |     |   |
|----------|---------------------------------------------------------------------------------------------------------------------------|------------|----|----|----|---|-----|---|
| 58161454 | Rice, brown, with tomatoes, fat added in cooking                                                                          | 8000_Mixed | 72 | 71 | 1  | 1 | 3.5 | C |
| 27420500 | Pork and vegetables including carrots, broccoli, and/or dark-green leafy; no potatoes, soy-based sauce                    | 8000_Mixed | 72 | 70 | 2  | 1 | 4   | B |
| 58160154 | Black beans and white rice                                                                                                | 8000_Mixed | 72 | 70 | 2  | 1 | 4.5 | A |
| 58161420 | Rice, brown, with corn, NS as to fat                                                                                      | 8000_Mixed | 72 | 70 | 2  | 1 | 3.5 | B |
| 58161424 | Rice, brown, with corn, fat added                                                                                         | 8000_Mixed | 72 | 70 | 2  | 1 | 3.5 | B |
| 58161442 | Rice, brown, with peas and carrots, no added fat                                                                          | 8000_Mixed | 72 | 68 | 4  | 1 | 3.5 | B |
| 58161532 | Rice, brown, with other vegetables, no added fat                                                                          | 8000_Mixed | 72 | 68 | 4  | 1 | 3.5 | B |
| 27420110 | Pork and vegetables, Hawaiian style                                                                                       | 8000_Mixed | 72 | 67 | 5  | 1 | 4   | A |
| 73501000 | Carrot soup, cream of, prepared with milk, home recipe, canned or ready-to-serve                                          | 8000_Mixed | 72 | 67 | 5  | 1 | 3.5 | B |
| 27440130 | Chicken or turkey shish kabob with vegetables, excluding potatoes                                                         | 8000_Mixed | 72 | 65 | 7  | 1 | 4   | A |
| 27150120 | Tuna with cream or white sauce                                                                                            | 8000_Mixed | 72 | 63 | 9  | 3 | 4   | A |
| 28351170 | Codfish soup with noodles, Puerto Rican style                                                                             | 8000_Mixed | 72 | 63 | 9  | 2 | 3.5 | B |
| 58155320 | Seafood paella, Puerto Rican style                                                                                        | 8000_Mixed | 72 | 62 | 10 | 1 | 3.5 | A |
| 27415220 | Beef, tofu, and vegetables excluding carrots, broccoli, and dark-green leafy; no potatoes, soy-based sauce                | 8000_Mixed | 71 | 73 | -2 | 2 | 3.5 | A |
| 27450100 | Tuna salad with egg                                                                                                       | 8000_Mixed | 71 | 73 | -2 | 4 | 3.5 | C |
| 72201241 | Broccoli, cooked, from fresh, with mushroom sauce                                                                         | 8000_Mixed | 71 | 72 | -1 | 2 | 3.5 | B |
| 58160106 | Pinto beans and rice, from fast food / restaurant                                                                         | 8000_Mixed | 71 | 70 | 1  | 1 | 4   | B |
| 75141040 | Cabbage salad or coleslaw, made with any type of fat free dressing                                                        | 8000_Mixed | 71 | 70 | 1  | 2 | 4.5 | A |
| 27130100 | Lamb or mutton curry                                                                                                      | 8000_Mixed | 71 | 69 | 2  | 1 | 3.5 | C |
| 27415100 | Beef and vegetables including carrots, broccoli, and/or dark-green leafy; no potatoes, soy-based sauce                    | 8000_Mixed | 71 | 69 | 2  | 1 | 4   | A |
| 27440110 | Chicken or turkey and vegetables including carrots, broccoli, and/or dark-green leafy; no potatoes, no sauce              | 8000_Mixed | 71 | 69 | 2  | 1 | 3.5 | B |
| 27445250 | Almond chicken                                                                                                            | 8000_Mixed | 71 | 69 | 2  | 1 | 4   | B |
| 58160104 | Black beans and rice, from fast food / restaurant                                                                         | 8000_Mixed | 71 | 69 | 2  | 1 | 4   | B |
| 58161405 | Rice, brown, with vegetables (excluding carrots, broccoli, and dark-green leafy), no sauce, NS as to fat added in cooking | 8000_Mixed | 71 | 69 | 2  | 1 | 3.5 | B |
| 58161409 | Rice, brown, with vegetables (excluding carrots, broccoli, and dark-green leafy), no sauce, fat added in cooking          | 8000_Mixed | 71 | 69 | 2  | 1 | 3.5 | B |
| 27420060 | Pork and vegetables including carrots, broccoli, and/or dark-green leafy; no potatoes, no sauce                           | 8000_Mixed | 71 | 68 | 3  | 1 | 4   | A |
| 75148000 | Cobb salad with dressing                                                                                                  | 8000_Mixed | 71 | 68 | 3  | 2 | 4   | B |
| 58132810 | Spaghetti with red clam sauce                                                                                             | 8000_Mixed | 71 | 67 | 4  | 2 | 4   | B |
| 58161407 | Rice, brown, with vegetables (excluding carrots, broccoli, and dark-green leafy), no sauce, fat not added in cooking      | 8000_Mixed | 71 | 67 | 4  | 1 | 3.5 | B |
| 72201250 | Broccoli, cooked, NS as to form, with cream sauce                                                                         | 8000_Mixed | 71 | 67 | 4  | 1 | 4   | A |
| 58150100 | Bibimbap, Korean                                                                                                          | 8000_Mixed | 71 | 66 | 5  | 1 | 4   | A |
| 27450065 | Tuna salad, made with light creamy dressing                                                                               | 8000_Mixed | 71 | 65 | 6  | 3 | 3.5 | B |
| 27460010 | Chow mein or chop suey, NS as to type of meat, no noodles                                                                 | 8000_Mixed | 71 | 65 | 6  | 1 | 4   | A |
| 58160810 | Rice, white, with lentils, no added fat                                                                                   | 8000_Mixed | 71 | 64 | 7  | 1 | 4   | A |
| 27250132 | Shrimp and noodles with tomato sauce                                                                                      | 8000_Mixed | 71 | 63 | 8  | 1 | 4   | B |

|          |                                                                                                                                                                         |            |    |    |    |   |     |   |
|----------|-------------------------------------------------------------------------------------------------------------------------------------------------------------------------|------------|----|----|----|---|-----|---|
| 27250080 | Salmon loaf                                                                                                                                                             | 8000_Mixed | 71 | 62 | 9  | 3 | 3   | D |
| 28351160 | Codfish, rice, and vegetable soup, Puerto Rican style                                                                                                                   | 8000_Mixed | 71 | 62 | 9  | 2 | 3.5 | B |
| 58146215 | Pasta with sauce, meatless, school lunch                                                                                                                                | 8000_Mixed | 70 | 79 | -9 | 4 | 4   | B |
| 73101210 | Carrots, raw, salad with apples                                                                                                                                         | 8000_Mixed | 70 | 78 | -8 | 3 | 4   | B |
| 75141020 | Cabbage salad or coleslaw, made with Italian dressing                                                                                                                   | 8000_Mixed | 70 | 77 | -7 | 3 | 4   | A |
| 27450060 | Tuna salad, made with mayonnaise                                                                                                                                        | 8000_Mixed | 70 | 74 | -4 | 4 | 3.5 | C |
| 27146150 | Chicken curry                                                                                                                                                           | 8000_Mixed | 70 | 71 | -1 | 2 | 3.5 | B |
| 58160102 | Kidney beans and rice, from fast food / restaurant                                                                                                                      | 8000_Mixed | 70 | 70 | 0  | 1 | 4   | A |
| 27320100 | Pork, potatoes, and vegetables including carrots, broccoli, and/or dark-green leafy; tomato-based sauce                                                                 | 8000_Mixed | 70 | 69 | 1  | 2 | 4   | A |
| 27420410 | Pork and vegetables excluding carrots, broccoli, and dark-green leafy; no potatoes, tomato-based sauce                                                                  | 8000_Mixed | 70 | 69 | 1  | 2 | 3.5 | B |
| 72201240 | Broccoli, cooked, NS as to form, with mushroom sauce                                                                                                                    | 8000_Mixed | 70 | 69 | 1  | 2 | 4   | B |
| 72201242 | Broccoli, cooked, from frozen, with mushroom sauce                                                                                                                      | 8000_Mixed | 70 | 69 | 1  | 2 | 4   | B |
| 27345310 | Chicken or turkey, rice, and vegetables including carrots, broccoli, and/or dark-green leafy; soy-based sauce                                                           | 8000_Mixed | 70 | 68 | 2  | 1 | 4   | B |
| 27446315 | Chicken or turkey garden salad with bacon and cheese, chicken and/or turkey, bacon, cheese, lettuce and/or greens, tomato and/or carrots, other vegetables, no dressing | 8000_Mixed | 70 | 68 | 2  | 2 | 4   | A |
| 58160110 | Beans and white rice                                                                                                                                                    | 8000_Mixed | 70 | 68 | 2  | 1 | 4   | A |
| 41812800 | Vegetarian stew                                                                                                                                                         | 8000_Mixed | 70 | 67 | 3  | 2 | 3.5 | B |
| 27410210 | Beef and vegetables including carrots, broccoli, and/or dark-green leafy; no potatoes, no sauce                                                                         | 8000_Mixed | 70 | 66 | 4  | 1 | 4   | B |
| 58161432 | Rice, brown, with peas, no added fat                                                                                                                                    | 8000_Mixed | 70 | 66 | 4  | 1 | 4   | B |
| 27250950 | Shellfish and noodles with tomato-based sauce                                                                                                                           | 8000_Mixed | 70 | 65 | 5  | 2 | 4   | B |
| 27443150 | Chicken or turkey divan                                                                                                                                                 | 8000_Mixed | 70 | 65 | 5  | 2 | 4   | A |
| 28340660 | Chicken or turkey vegetable soup, home recipe                                                                                                                           | 8000_Mixed | 70 | 65 | 5  | 1 | 3.5 | B |
| 27415150 | Beef chow mein or chop suey, no noodles                                                                                                                                 | 8000_Mixed | 70 | 64 | 6  | 1 | 4   | A |
| 27446100 | Chicken or turkey chow mein or chop suey, no noodles                                                                                                                    | 8000_Mixed | 70 | 64 | 6  | 1 | 4   | A |
| 27464000 | Gumbo, no rice                                                                                                                                                          | 8000_Mixed | 70 | 64 | 6  | 1 | 3.5 | C |
| 28340670 | Chicken or turkey vegetable soup with rice, home recipe, Mexican style                                                                                                  | 8000_Mixed | 70 | 63 | 7  | 1 | 4   | A |
| 27250030 | Codfish ball or cake                                                                                                                                                    | 8000_Mixed | 70 | 62 | 8  | 2 | 4   | B |
| 28311030 | Menudo soup, canned, prepared with water or ready-to-serve                                                                                                              | 8000_Mixed | 70 | 59 | 11 | 2 | 3.5 | C |
| 41209000 | Falafel                                                                                                                                                                 | 8000_Mixed | 69 | 73 | -4 | 2 | 4   | D |
| 72125260 | Spinach and cheese casserole                                                                                                                                            | 8000_Mixed | 69 | 73 | -4 | 3 | 3.5 | C |
| 27116100 | Beef curry                                                                                                                                                              | 8000_Mixed | 69 | 69 | 0  | 2 | 4   | B |
| 72201231 | Broccoli, cooked, from fresh, with cheese sauce                                                                                                                         | 8000_Mixed | 69 | 69 | 0  | 2 | 3.5 | C |
| 27341060 | Chicken or turkey, potatoes, and vegetables excluding carrots, broccoli, and dark-green leafy; tomato-based sauce                                                       | 8000_Mixed | 69 | 68 | 1  | 2 | 4   | B |
| 27510511 | Hamburger, 1 miniature patty, on miniature bun, from school                                                                                                             | 8000_Mixed | 69 | 68 | 1  | 3 | 4   | A |
| 58160100 | Beans and rice, from fast food / restaurant                                                                                                                             | 8000_Mixed | 69 | 68 | 1  | 1 | 4   | B |
| 75412070 | Eggplant with cheese and tomato sauce                                                                                                                                   | 8000_Mixed | 69 | 68 | 1  | 3 | 4.5 | A |

|          |                                                                                                                            |            |    |    |    |   |     |   |
|----------|----------------------------------------------------------------------------------------------------------------------------|------------|----|----|----|---|-----|---|
| 27315270 | Stuffed grape leaves with beef and rice                                                                                    | 8000_Mixed | 69 | 67 | 2  | 1 | 4.5 | A |
| 27411200 | Beef with vegetables excluding carrots, broccoli, and dark-green leafy; no potatoes, tomato-based sauce                    | 8000_Mixed | 69 | 67 | 2  | 2 | 3.5 | B |
| 27420510 | Pork and vegetables excluding carrots, broccoli, and dark- green leafy; no potatoes, soy-based sauce                       | 8000_Mixed | 69 | 67 | 2  | 1 | 4   | B |
| 27445220 | Kung pao chicken                                                                                                           | 8000_Mixed | 69 | 67 | 2  | 1 | 3.5 | C |
| 27540250 | Chicken fillet, broiled, sandwich with cheese, on whole wheat roll, with lettuce, tomato and non-mayonnaise type spread    | 8000_Mixed | 69 | 67 | 2  | 3 | 3.5 | C |
| 27260510 | Liver dumpling                                                                                                             | 8000_Mixed | 69 | 66 | 3  | 2 | 2   | D |
| 27341010 | Chicken or turkey, potatoes, and vegetables including carrots, broccoli, and/or dark-green leafy; no sauce                 | 8000_Mixed | 69 | 66 | 3  | 1 | 4   | B |
| 58160120 | Beans and rice, with tomatoes                                                                                              | 8000_Mixed | 69 | 66 | 3  | 1 | 4   | B |
| 75450500 | Vegetable combination, including carrots, broccoli, and/or dark-green leafy; cooked, with cream sauce                      | 8000_Mixed | 69 | 66 | 3  | 1 | 3.5 | B |
| 77250710 | Tannier fritters, Puerto Rican style                                                                                       | 8000_Mixed | 69 | 66 | 3  | 2 | 4.5 | A |
| 28150240 | Sole with vegetable (diet frozen meal)                                                                                     | 8000_Mixed | 69 | 65 | 4  | 4 | 3.5 | C |
| 58160130 | Rice with beans and chicken                                                                                                | 8000_Mixed | 69 | 65 | 4  | 1 | 4   | A |
| 27341310 | Chicken or turkey stew with potatoes and vegetables including carrots, broccoli, and/or dark-green leafy; gravy            | 8000_Mixed | 69 | 64 | 5  | 1 | 4   | A |
| 58161422 | Rice, brown, with corn, no added fat                                                                                       | 8000_Mixed | 69 | 64 | 5  | 1 | 3.5 | B |
| 27111400 | Chili con carne, NS as to beans                                                                                            | 8000_Mixed | 69 | 63 | 6  | 2 | 4   | B |
| 27111406 | Chili con carne with beans, home recipe                                                                                    | 8000_Mixed | 69 | 63 | 6  | 2 | 4   | B |
| 27336100 | Venison or deer stew with potatoes and vegetables including carrots, broccoli, and/or dark-green leafy; tomato-based sauce | 8000_Mixed | 69 | 61 | 8  | 1 | 4   | A |
| 27440150 | Chicken or turkey pate with vegetables, diet                                                                               | 8000_Mixed | 69 | 59 | 10 | 1 | 4.5 | A |
| 27150510 | Scallops with cheese sauce                                                                                                 | 8000_Mixed | 69 | 58 | 11 | 2 | 3.5 | C |
| 58155910 | Rice with squid, Puerto Rican style                                                                                        | 8000_Mixed | 69 | 57 | 12 | 1 | 3   | C |
| 27350060 | Shrimp creole, with rice                                                                                                   | 8000_Mixed | 69 | 56 | 13 | 2 | 3.5 | B |
| 14670000 | Mozzarella cheese, tomato, and basil, with oil and vinegar dressing                                                        | 8000_Mixed | 68 | 70 | -2 | 3 | 3.5 | C |
| 27446205 | Chicken or turkey salad with nuts and/or fruits                                                                            | 8000_Mixed | 68 | 70 | -2 | 3 | 3.5 | C |
| 27510150 | Cheeseburger, 1 miniature patty, on miniature bun, from school                                                             | 8000_Mixed | 68 | 69 | -1 | 3 | 4   | D |
| 27311625 | Beef, potatoes, and vegetables including carrots, broccoli, and/or dark-green leafy; tomato-based sauce                    | 8000_Mixed | 68 | 67 | 1  | 2 | 4   | B |
| 58163360 | Flavored rice, brown and wild                                                                                              | 8000_Mixed | 68 | 66 | 2  | 1 | 3.5 | C |
| 72201230 | Broccoli, cooked, NS as to form, with cheese sauce                                                                         | 8000_Mixed | 68 | 66 | 2  | 3 | 4   | B |
| 72201232 | Broccoli, cooked, from frozen, with cheese sauce                                                                           | 8000_Mixed | 68 | 66 | 2  | 3 | 4   | B |
| 27415200 | Beef and vegetables excluding carrots, broccoli, and dark-green leafy; no potatoes, soy-based sauce                        | 8000_Mixed | 68 | 65 | 3  | 1 | 4   | A |
| 27420160 | Moo Shu pork, without Chinese pancake                                                                                      | 8000_Mixed | 68 | 65 | 3  | 2 | 3   | D |
| 58165430 | Rice, brown, with vegetables and gravy, NS as to fat                                                                       | 8000_Mixed | 68 | 65 | 3  | 1 | 3.5 | C |
| 27351020 | Codfish salad, Puerto Rican style (Gazpacho de bacalao)                                                                    | 8000_Mixed | 68 | 64 | 4  | 2 | 3.5 | B |
| 41601090 | Bean soup, with macaroni, home recipe, canned, or ready-to-serve                                                           | 8000_Mixed | 68 | 64 | 4  | 1 | 4   | B |
| 41601170 | Bean and rice soup                                                                                                         | 8000_Mixed | 68 | 64 | 4  | 2 | 3.5 | B |
| 27250270 | Clams Casino                                                                                                               | 8000_Mixed | 68 | 62 | 6  | 3 | 4   | B |

|          |                                                                                                                         |            |    |    |    |   |     |   |
|----------|-------------------------------------------------------------------------------------------------------------------------|------------|----|----|----|---|-----|---|
| 28315140 | Beef vegetable soup, home recipe, Mexican style                                                                         | 8000_Mixed | 68 | 61 | 7  | 1 | 4   | A |
| 27336150 | Venison or deer stew with potatoes and vegetables excluding carrots, broccoli, and dark-green leafy; tomato-based sauce | 8000_Mixed | 68 | 60 | 8  | 1 | 4   | A |
| 28345170 | Duck soup                                                                                                               | 8000_Mixed | 68 | 60 | 8  | 1 | 4   | A |
| 28350050 | Fish chowder                                                                                                            | 8000_Mixed | 68 | 58 | 10 | 2 | 3.5 | B |
| 58151420 | Sushi, topped with salmon                                                                                               | 8000_Mixed | 68 | 57 | 11 | 1 | 3.5 | B |
| 75141030 | Cabbage salad or coleslaw, made with creamy dressing                                                                    | 8000_Mixed | 67 | 76 | -9 | 3 | 4   | B |
| 41203030 | Black bean salad                                                                                                        | 8000_Mixed | 67 | 71 | -4 | 3 | 4   | B |
| 74501010 | Tomato aspic                                                                                                            | 8000_Mixed | 67 | 70 | -3 | 2 | 3.5 | B |
| 75440500 | Vegetable combinations, including carrots, broccoli, and/or dark-green leafy; cooked, with cheese sauce                 | 8000_Mixed | 67 | 66 | 1  | 3 | 3.5 | C |
| 75651140 | Vegetable soup with chicken broth, home recipe, Mexican style                                                           | 8000_Mixed | 67 | 66 | 1  | 1 | 3.5 | A |
| 27311645 | Beef, potatoes, and vegetables including carrots, broccoli, and/or dark-green leafy; soy-based sauce                    | 8000_Mixed | 67 | 65 | 2  | 1 | 4   | A |
| 27440120 | Chicken or turkey and vegetables excluding carrots, broccoli, and dark-green leafy; no potatoes, no sauce               | 8000_Mixed | 67 | 65 | 2  | 2 | 3.5 | C |
| 58165450 | Rice, brown, with vegetables and gravy, fat added                                                                       | 8000_Mixed | 67 | 65 | 2  | 1 | 3.5 | C |
| 27345320 | Chicken or turkey, rice, and vegetables excluding carrots, broccoli, and dark-green leafy; soy-based sauce              | 8000_Mixed | 67 | 64 | 3  | 1 | 3.5 | B |
| 27416150 | Pepper steak                                                                                                            | 8000_Mixed | 67 | 64 | 3  | 1 | 4   | B |
| 58147110 | Pasta with tomato-based sauce and beans or lentils                                                                      | 8000_Mixed | 67 | 64 | 3  | 1 | 4   | B |
| 72201251 | Broccoli, cooked, from fresh, with cream sauce                                                                          | 8000_Mixed | 67 | 64 | 3  | 1 | 3.5 | B |
| 27211150 | Beef goulash with potatoes                                                                                              | 8000_Mixed | 67 | 63 | 4  | 1 | 4   | A |
| 58160140 | Rice with beans and pork                                                                                                | 8000_Mixed | 67 | 63 | 4  | 1 | 4   | A |
| 75417021 | Peas, cooked, from fresh, with mushroom sauce                                                                           | 8000_Mixed | 67 | 63 | 4  | 2 | 4   | B |
| 27341320 | Chicken or turkey stew with potatoes and vegetables excluding carrots, broccoli, and dark-green leafy; gravy            | 8000_Mixed | 67 | 61 | 6  | 1 | 4   | A |
| 75652010 | Vegetable beef soup, home recipe                                                                                        | 8000_Mixed | 67 | 61 | 6  | 1 | 3.5 | B |
| 27111310 | Beef stew, no potatoes, tomato-based sauce, with chili peppers, Mexican style                                           | 8000_Mixed | 67 | 60 | 7  | 1 | 4   | B |
| 27121000 | Pork with chili and tomatoes                                                                                            | 8000_Mixed | 67 | 60 | 7  | 1 | 4   | A |
| 58110200 | Roll with meat and/or shrimp, vegetables and rice paper, not fried                                                      | 8000_Mixed | 67 | 59 | 8  | 1 | 4   | B |
| 75646010 | Shav soup                                                                                                               | 8000_Mixed | 67 | 56 | 11 | 1 | 3.5 | B |
| 58151150 | Sushi, with seafood, no vegetables                                                                                      | 8000_Mixed | 67 | 55 | 12 | 1 | 3.5 | B |
| 27460100 | Lau lau                                                                                                                 | 8000_Mixed | 67 | 52 | 15 | 1 | 4   | A |
| 75412060 | Eggplant parmesan casserole, regular                                                                                    | 8000_Mixed | 66 | 66 | 0  | 2 | 4   | B |
| 27311650 | Beef, potatoes, and vegetables excluding carrots, broccoli, and dark-green leafy; soy-based sauce                       | 8000_Mixed | 66 | 64 | 2  | 1 | 4   | A |
| 27320110 | Pork, potatoes, and vegetables excluding carrots, broccoli, and dark-green leafy; tomato-based sauce                    | 8000_Mixed | 66 | 64 | 2  | 2 | 4   | B |
| 27420150 | Kung Pao pork                                                                                                           | 8000_Mixed | 66 | 64 | 2  | 1 | 4   | A |
| 27320320 | Pork, rice, and vegetables including carrots, broccoli, and/or dark-green leafy; soy-based sauce                        | 8000_Mixed | 66 | 63 | 3  | 1 | 4   | A |
| 58165440 | Rice, brown, with vegetables and gravy, no added fat                                                                    | 8000_Mixed | 66 | 62 | 4  | 1 | 3.5 | C |

|          |                                                                                                           |            |    |    |    |   |     |   |
|----------|-----------------------------------------------------------------------------------------------------------|------------|----|----|----|---|-----|---|
| 72201252 | Broccoli, cooked, from frozen, with cream sauce                                                           | 8000_Mixed | 66 | 62 | 4  | 1 | 3.5 | B |
| 75414011 | Mushrooms, from fresh, creamed                                                                            | 8000_Mixed | 66 | 62 | 4  | 1 | 3.5 | B |
| 27250150 | Tuna loaf                                                                                                 | 8000_Mixed | 66 | 61 | 5  | 3 | 4   | B |
| 27121410 | Chili con carne with beans, made with pork                                                                | 8000_Mixed | 66 | 60 | 6  | 2 | 4   | B |
| 28320300 | Pork with vegetable excluding carrots, broccoli and/or dark-green leafy; soup, Asian Style                | 8000_Mixed | 66 | 60 | 6  | 1 | 3.5 | B |
| 41601040 | Lima bean soup, home recipe, canned or ready-to-serve                                                     | 8000_Mixed | 66 | 57 | 9  | 2 | 4   | B |
| 27150160 | Shrimp with lobster sauce                                                                                 | 8000_Mixed | 66 | 54 | 12 | 2 | 2   | D |
| 27450090 | Tuna salad with cheese                                                                                    | 8000_Mixed | 65 | 68 | -3 | 4 | 3   | D |
| 75141100 | Cabbage salad or coleslaw with apples and/or raisins, with dressing                                       | 8000_Mixed | 65 | 68 | -3 | 3 | 4   | B |
| 27311630 | Beef, potatoes, and vegetables excluding carrots, broccoli, and dark-green leafy; tomato-based sauce      | 8000_Mixed | 65 | 64 | 1  | 2 | 4   | B |
| 27442110 | Chicken or turkey and vegetables including carrots, broccoli, and/or dark-green leafy; no potatoes, gravy | 8000_Mixed | 65 | 63 | 2  | 2 | 3.5 | C |
| 27450070 | Shrimp salad                                                                                              | 8000_Mixed | 65 | 63 | 2  | 4 | 3   | D |
| 58146371 | Pasta with tomato-based sauce, seafood, and added vegetables, restaurant                                  | 8000_Mixed | 65 | 63 | 2  | 2 | 3.5 | C |
| 58165480 | Rice, brown, with vegetables, soy-based sauce, fat added                                                  | 8000_Mixed | 65 | 63 | 2  | 1 | 3.5 | C |
| 75406011 | Brussels sprouts, from fresh, creamed                                                                     | 8000_Mixed | 65 | 63 | 2  | 1 | 3.5 | B |
| 27315510 | Beef, rice, and vegetables including carrots, broccoli, and/or dark-green leafy; soy-based sauce          | 8000_Mixed | 65 | 62 | 3  | 1 | 4   | A |
| 27415170 | Kung Pao beef                                                                                             | 8000_Mixed | 65 | 62 | 3  | 1 | 4   | A |
| 27420170 | Pork and onions with soy-based sauce                                                                      | 8000_Mixed | 65 | 62 | 3  | 1 | 3.5 | B |
| 27320040 | Pork, potatoes, and vegetables including carrots, broccoli, and/or dark-green leafy; no sauce             | 8000_Mixed | 65 | 61 | 4  | 1 | 4   | B |
| 58132800 | Spaghetti with clam sauce, NS as to red or white                                                          | 8000_Mixed | 65 | 61 | 4  | 2 | 3.5 | C |
| 58132820 | Spaghetti with white clam sauce                                                                           | 8000_Mixed | 65 | 61 | 4  | 2 | 3.5 | C |
| 58160132 | Beans and rice, with meat                                                                                 | 8000_Mixed | 65 | 61 | 4  | 1 | 4   | A |
| 58160135 | Rice with beans and beef                                                                                  | 8000_Mixed | 65 | 61 | 4  | 1 | 4   | A |
| 58406020 | Turkey noodle soup, home recipe                                                                           | 8000_Mixed | 65 | 61 | 4  | 2 | 3.5 | A |
| 75460700 | Vegetable combinations, including carrots, broccoli, and/or dark-green leafy; cooked, with pasta          | 8000_Mixed | 65 | 61 | 4  | 1 | 4   | A |
| 27415130 | Szechuan beef                                                                                             | 8000_Mixed | 65 | 60 | 5  | 1 | 3.5 | C |
| 27415140 | Hunan beef                                                                                                | 8000_Mixed | 65 | 60 | 5  | 1 | 3.5 | C |
| 28320160 | Pork vegetable soup with potato, pasta, or rice, stew type, chunky style                                  | 8000_Mixed | 65 | 60 | 5  | 1 | 3.5 | B |
| 75410530 | Chiles rellenos, filled with meat and cheese                                                              | 8000_Mixed | 65 | 60 | 5  | 2 | 3.5 | C |
| 27246505 | Meat loaf made with chicken or turkey, with tomato-based sauce                                            | 8000_Mixed | 65 | 58 | 7  | 2 | 3.5 | B |
| 27363000 | Gumbo with rice                                                                                           | 8000_Mixed | 65 | 58 | 7  | 1 | 3.5 | B |
| 28310220 | Chili beef soup, chunky style                                                                             | 8000_Mixed | 65 | 57 | 8  | 1 | 3.5 | C |
| 27250120 | Shrimp and noodles, no sauce                                                                              | 8000_Mixed | 65 | 55 | 10 | 1 | 4   | A |
| 75140990 | Cabbage salad or coleslaw, from fast food / restaurant                                                    | 8000_Mixed | 64 | 65 | -1 | 1 | 4   | B |
| 27341025 | Chicken or turkey, potatoes, and vegetables including carrots, broccoli, and/or dark-green leafy; gravy   | 8000_Mixed | 64 | 62 | 2  | 2 | 3.5 | C |

|          |                                                                                                         |            |    |    |    |   |     |   |
|----------|---------------------------------------------------------------------------------------------------------|------------|----|----|----|---|-----|---|
| 27550110 | Crab cake sandwich                                                                                      | 8000_Mixed | 64 | 62 | 2  | 3 | 3.5 | C |
| 58146361 | Pasta with tomato-based sauce and seafood, restaurant                                                   | 8000_Mixed | 64 | 62 | 2  | 2 | 3   | C |
| 58162140 | Stuffed tomato, with rice, meatless                                                                     | 8000_Mixed | 64 | 62 | 2  | 1 | 4   | A |
| 58164830 | Rice, brown, with gravy, NS as to fat                                                                   | 8000_Mixed | 64 | 62 | 2  | 2 | 3.5 | C |
| 58164850 | Rice, brown, with gravy, fat added                                                                      | 8000_Mixed | 64 | 62 | 2  | 2 | 3.5 | C |
| 58165460 | Rice, brown, with vegetables, soy-based sauce, NS as to fat                                             | 8000_Mixed | 64 | 62 | 2  | 1 | 3.5 | C |
| 75144100 | Lettuce, wilted, with bacon dressing                                                                    | 8000_Mixed | 64 | 62 | 2  | 2 | 4.5 | A |
| 27313150 | Beef, noodles, and vegetables including carrots, broccoli, and/or dark-green leafy; soy-based sauce     | 8000_Mixed | 64 | 61 | 3  | 1 | 4   | A |
| 27341020 | Chicken or turkey, potatoes, and vegetables excluding carrots, broccoli, and dark-green leafy; no sauce | 8000_Mixed | 64 | 61 | 3  | 1 | 4   | A |
| 58101820 | Mexican casserole made with ground beef, beans, tomato sauce, cheese, taco seasonings, and corn chips   | 8000_Mixed | 64 | 61 | 3  | 2 | 4   | C |
| 27311110 | Beef, potatoes, and vegetables including carrots, broccoli, and/or dark-green leafy; no sauce           | 8000_Mixed | 64 | 60 | 4  | 1 | 4   | B |
| 75649100 | Vegetable soup, cream of, made from dry mix, low sodium, prepared with water                            | 8000_Mixed | 64 | 60 | 4  | 2 | 4   | A |
| 27335500 | Stewed rabbit, Puerto Rican style,                                                                      | 8000_Mixed | 64 | 59 | 5  | 1 | 4   | B |
| 27450510 | Tuna casserole with vegetables and mushroom sauce, no noodles                                           | 8000_Mixed | 64 | 59 | 5  | 3 | 3.5 | C |
| 27111100 | Beef goulash                                                                                            | 8000_Mixed | 64 | 57 | 7  | 1 | 4   | A |
| 27360100 | Brunswick stew                                                                                          | 8000_Mixed | 64 | 57 | 7  | 1 | 4   | A |
| 27420520 | Pork shish kabob with vegetables, excluding potatoes                                                    | 8000_Mixed | 64 | 57 | 7  | 1 | 4   | A |
| 27362000 | Stewed tripe, with potatoes, Puerto Rican style                                                         | 8000_Mixed | 64 | 56 | 8  | 2 | 4   | C |
| 27463000 | Stewed gizzards, Puerto Rican style                                                                     | 8000_Mixed | 64 | 56 | 8  | 2 | 4   | A |
| 41601130 | Bean soup, mixed beans, home recipe, canned or ready-to-serve                                           | 8000_Mixed | 64 | 56 | 8  | 1 | 4   | B |
| 27142200 | Turkey with gravy                                                                                       | 8000_Mixed | 64 | 55 | 9  | 1 | 4   | A |
| 28311020 | Menudo soup, home recipe                                                                                | 8000_Mixed | 64 | 55 | 9  | 1 | 3.5 | B |
| 58151410 | Sushi, topped with eel                                                                                  | 8000_Mixed | 64 | 53 | 11 | 1 | 3.5 | C |
| 58409000 | Noodle soup, with fish ball, shrimp, and dark green leafy vegetable                                     | 8000_Mixed | 64 | 51 | 13 | 1 | 3.5 | B |
| 27261000 | Breaded brains, Puerto Rican style                                                                      | 8000_Mixed | 64 | 49 | 15 | 2 | 3   | C |
| 58146613 | Pasta, whole grain, with tomato-based sauce and added vegetables, ready-to-heat                         | 8000_Mixed | 63 | 72 | -9 | 4 | 3.5 | C |
| 75140510 | Broccoli slaw salad                                                                                     | 8000_Mixed | 63 | 69 | -6 | 3 | 4   | B |
| 27336200 | Venison or deer, potatoes, and vegetables including carrots, broccoli, and/or dark-green leafy; gravy   | 8000_Mixed | 63 | 61 | 2  | 2 | 3.5 | B |
| 28150230 | Turbot with vegetable (diet frozen meal)                                                                | 8000_Mixed | 63 | 61 | 2  | 4 | 3.5 | C |
| 73102250 | Carrots, cooked, NS as to form, with cheese sauce                                                       | 8000_Mixed | 63 | 61 | 2  | 2 | 3.5 | C |
| 73102251 | Carrots, cooked, from fresh, with cheese sauce                                                          | 8000_Mixed | 63 | 61 | 2  | 2 | 3.5 | C |
| 73102252 | Carrots, cooked, from frozen, with cheese sauce                                                         | 8000_Mixed | 63 | 61 | 2  | 2 | 3.5 | C |
| 27320330 | Pork, rice, and vegetables excluding carrots, broccoli, and dark-green leafy; soy-based sauce           | 8000_Mixed | 63 | 60 | 3  | 1 | 4   | A |
| 27545210 | Turkey or chicken burger, with condiments, on wheat bun                                                 | 8000_Mixed | 63 | 60 | 3  | 3 | 4   | B |
| 27545220 | Turkey or chicken burger, with condiments, on whole wheat bun                                           | 8000_Mixed | 63 | 60 | 3  | 3 | 4   | B |

|          |                                                                                                                                               |            |    |    |     |   |     |   |
|----------|-----------------------------------------------------------------------------------------------------------------------------------------------|------------|----|----|-----|---|-----|---|
| 27250020 | Clams, stuffed                                                                                                                                | 8000_Mixed | 63 | 59 | 4   | 3 | 3.5 | C |
| 27313160 | Beef, noodles, and vegetables excluding carrots, broccoli, and dark-green leafy; soy-based sauce                                              | 8000_Mixed | 63 | 59 | 4   | 1 | 4   | A |
| 27418210 | Beef stew with vegetables excluding potatoes, Puerto Rican style                                                                              | 8000_Mixed | 63 | 59 | 4   | 1 | 4   | C |
| 27420350 | Pork and vegetables excluding carrots, broccoli, and dark-green leafy; no potatoes, no sauce                                                  | 8000_Mixed | 63 | 59 | 4   | 1 | 4   | B |
| 58164840 | Rice, brown, with gravy, no added fat                                                                                                         | 8000_Mixed | 63 | 59 | 4   | 1 | 3.5 | C |
| 72116230 | Escarole, creamed                                                                                                                             | 8000_Mixed | 63 | 59 | 4   | 1 | 3.5 | B |
| 73111031 | Peas and carrots, from fresh, creamed                                                                                                         | 8000_Mixed | 63 | 58 | 5   | 1 | 3.5 | C |
| 75649150 | Vegetable noodle soup, home recipe                                                                                                            | 8000_Mixed | 63 | 58 | 5   | 1 | 3.5 | C |
| 77316510 | Stuffed cabbage, with meat and rice, Syrian dish, Puerto Rican style                                                                          | 8000_Mixed | 63 | 58 | 5   | 1 | 4.5 | A |
| 27111200 | Beef burgundy                                                                                                                                 | 8000_Mixed | 63 | 56 | 7   | 1 | 4   | A |
| 27150020 | Crab, deviled                                                                                                                                 | 8000_Mixed | 63 | 56 | 7   | 3 | 3   | D |
| 27420390 | Pork chow mein or chop suey, no noodles                                                                                                       | 8000_Mixed | 63 | 56 | 7   | 1 | 4   | A |
| 27410250 | Beef shish kabob with vegetables, excluding potatoes                                                                                          | 8000_Mixed | 63 | 55 | 8   | 1 | 4   | A |
| 55702000 | Cake or pancake made with rice flour and/or dried beans                                                                                       | 8000_Mixed | 63 | 54 | 9   | 1 | 4.5 | A |
| 28355310 | Oyster stew                                                                                                                                   | 8000_Mixed | 63 | 52 | 11  | 1 | 3   | C |
| 58136130 | Lo mein, with shrimp                                                                                                                          | 8000_Mixed | 63 | 50 | 13  | 1 | 3.5 | B |
| 58146603 | Pasta, whole grain, with tomato-based sauce, ready-to-heat                                                                                    | 8000_Mixed | 62 | 72 | -10 | 4 | 3.5 | C |
| 28355140 | Clam chowder, New England, reduced sodium, canned or ready-to-serve                                                                           | 8000_Mixed | 62 | 64 | -2  | 4 | 3.5 | B |
| 58146221 | Pasta with tomato-based sauce, restaurant                                                                                                     | 8000_Mixed | 62 | 63 | -1  | 2 | 3   | C |
| 58162120 | Stuffed pepper, with rice, meatless                                                                                                           | 8000_Mixed | 62 | 63 | -1  | 2 | 3.5 | C |
| 27341035 | Chicken or turkey, potatoes, and vegetables including carrots, broccoli, and/or dark-green leafy; cream sauce, white sauce, or mushroom sauce | 8000_Mixed | 62 | 61 | 1   | 2 | 3.5 | C |
| 58100625 | Enchilada with chicken and beans, green-chile or enchilada sauce                                                                              | 8000_Mixed | 62 | 61 | 1   | 3 | 4   | B |
| 58146741 | Pasta, whole grain, with cream sauce and seafood, restaurant                                                                                  | 8000_Mixed | 62 | 61 | 1   | 2 | 2.5 | D |
| 75403020 | Green bean casserole                                                                                                                          | 8000_Mixed | 62 | 61 | 1   | 3 | 4   | B |
| 58104110 | Nachos with beans, no cheese                                                                                                                  | 8000_Mixed | 62 | 60 | 2   | 3 | 4.5 | A |
| 58164860 | Rice, brown, with soy-based sauce, NS as to fat                                                                                               | 8000_Mixed | 62 | 60 | 2   | 1 | 3   | C |
| 58164880 | Rice, brown, with soy-based sauce, fat added                                                                                                  | 8000_Mixed | 62 | 60 | 2   | 1 | 3   | C |
| 27315520 | Beef, rice, and vegetables excluding carrots, broccoli, and dark-green leafy; soy-based sauce                                                 | 8000_Mixed | 62 | 59 | 3   | 1 | 4   | A |
| 27420120 | Pork and watercress with soy-based sauce                                                                                                      | 8000_Mixed | 62 | 59 | 3   | 1 | 3.5 | B |
| 27540205 | Chicken fillet sandwich, grilled, on wheat bun                                                                                                | 8000_Mixed | 62 | 59 | 3   | 3 | 4   | A |
| 58165400 | Rice, brown, with vegetables, cheese and/or cream based sauce, NS as to fat                                                                   | 8000_Mixed | 62 | 59 | 3   | 2 | 3.5 | C |
| 58165420 | Rice, brown, with vegetables, cheese and/or cream based sauce, fat added                                                                      | 8000_Mixed | 62 | 59 | 3   | 2 | 3.5 | C |
| 58174100 | Dosa (Indian), with filling                                                                                                                   | 8000_Mixed | 62 | 59 | 3   | 1 | 3.5 | C |
| 27343510 | Chicken or turkey, noodles, and vegetables including carrots, broccoli, and/or dark-green leafy; tomato-based sauce                           | 8000_Mixed | 62 | 58 | 4   | 1 | 3.5 | C |
| 27545110 | Turkey or chicken burger, on wheat bun                                                                                                        | 8000_Mixed | 62 | 58 | 4   | 2 | 4   | A |

|          |                                                                                                                   |            |    |    |    |   |     |   |
|----------|-------------------------------------------------------------------------------------------------------------------|------------|----|----|----|---|-----|---|
| 41601100 | Portuguese bean soup, home recipe, canned or ready-to-serve                                                       | 8000_Mixed | 62 | 58 | 4  | 2 | 4.5 | A |
| 58101910 | Taco or tostada salad with beef and cheese, corn chips                                                            | 8000_Mixed | 62 | 58 | 4  | 2 | 3.5 | C |
| 75403010 | Beans, string, green, NS as to form, creamed or with cheese sauce                                                 | 8000_Mixed | 62 | 58 | 4  | 2 | 3.5 | C |
| 27320210 | Pork, potatoes, and vegetables excluding carrots, broccoli, and dark-green leafy; no sauce                        | 8000_Mixed | 62 | 57 | 5  | 1 | 4   | A |
| 27336300 | Venison or deer, noodles, and vegetables including carrots, broccoli, and/or dark-green leafy; tomato-based sauce | 8000_Mixed | 62 | 57 | 5  | 1 | 3.5 | B |
| 27410220 | Beef and vegetables excluding carrots, broccoli, and dark-green leafy; no potatoes, no sauce                      | 8000_Mixed | 62 | 57 | 5  | 1 | 4   | B |
| 73102231 | Carrots, cooked, from fresh, creamed                                                                              | 8000_Mixed | 62 | 57 | 5  | 1 | 3.5 | C |
| 27211100 | Beef stew with potatoes, tomato-based sauce                                                                       | 8000_Mixed | 62 | 56 | 6  | 1 | 4   | A |
| 75417011 | Peas, from fresh, creamed                                                                                         | 8000_Mixed | 62 | 56 | 6  | 1 | 3.5 | B |
| 27311410 | Beef stew with potatoes and vegetables including carrots, broccoli, and/or dark-green leafy; gravy                | 8000_Mixed | 62 | 55 | 7  | 1 | 4   | A |
| 41601140 | Bean soup, home recipe                                                                                            | 8000_Mixed | 62 | 55 | 7  | 1 | 4   | A |
| 58115150 | Tamal in a leaf, Puerto Rican style                                                                               | 8000_Mixed | 62 | 55 | 7  | 1 | 4   | B |
| 58137240 | Pad Thai with seafood                                                                                             | 8000_Mixed | 62 | 55 | 7  | 1 | 3.5 | C |
| 27111405 | Chili con carne with beans, from restaurant                                                                       | 8000_Mixed | 62 | 54 | 8  | 1 | 3.5 | C |
| 27430610 | Lamb shish kabob with vegetables, excluding potatoes                                                              | 8000_Mixed | 62 | 54 | 8  | 1 | 4   | A |
| 41602020 | Garbanzo bean or chickpea soup, home recipe, canned or ready-to-serve                                             | 8000_Mixed | 62 | 54 | 8  | 1 | 4   | B |
| 32105210 | Chicken egg foo yung                                                                                              | 8000_Mixed | 62 | 52 | 10 | 1 | 3.5 | B |
| 58146653 | Pasta, whole grain, with tomato-based sauce, poultry, and added vegetables, ready-to-heat                         | 8000_Mixed | 61 | 69 | -8 | 4 | 3.5 | B |
| 75141200 | Cabbage salad or coleslaw with pineapple, with dressing                                                           | 8000_Mixed | 61 | 66 | -5 | 3 | 4   | B |
| 75416500 | Pea salad                                                                                                         | 8000_Mixed | 61 | 66 | -5 | 3 | 3.5 | C |
| 42301125 | Peanut butter sandwich, with reduced fat peanut butter, on whole wheat bread                                      | 8000_Mixed | 61 | 65 | -4 | 3 | 3.5 | C |
| 74506000 | Tomato and cucumber salad made with tomato, cucumber, oil, and vinegar                                            | 8000_Mixed | 61 | 64 | -3 | 2 | 3   | C |
| 58100720 | Enchilada with beans, meatless, red-chile or enchilada sauce                                                      | 8000_Mixed | 61 | 61 | 0  | 3 | 4   | B |
| 27250450 | Shrimp toast, fried                                                                                               | 8000_Mixed | 61 | 59 | 2  | 2 | 3   | D |
| 27341030 | Chicken or turkey, potatoes, and vegetables excluding carrots, broccoli, and dark-green leafy; gravy              | 8000_Mixed | 61 | 59 | 2  | 2 | 3.5 | C |
| 58100620 | Enchilada with chicken and beans, red-chile or enchilada sauce                                                    | 8000_Mixed | 61 | 59 | 2  | 3 | 4   | B |
| 58132450 | Spaghetti with tomato sauce, meatless, made with spinach noodles                                                  | 8000_Mixed | 61 | 59 | 2  | 2 | 3.5 | C |
| 77316010 | Stuffed cabbage, with meat, Puerto Rican style                                                                    | 8000_Mixed | 61 | 59 | 2  | 2 | 4   | C |
| 27311600 | Beef, potatoes, and vegetables including carrots, broccoli, and/or dark-green leafy; gravy                        | 8000_Mixed | 61 | 58 | 3  | 2 | 3.5 | B |
| 27320140 | Pork, potatoes, and vegetables including carrots, broccoli, and/or dark-green leafy; gravy                        | 8000_Mixed | 61 | 58 | 3  | 2 | 3.5 | B |
| 27336250 | Venison or deer, potatoes, and vegetables excluding carrots, broccoli, and dark-green leafy; gravy                | 8000_Mixed | 61 | 58 | 3  | 2 | 3.5 | B |
| 27550120 | Salmon cake sandwich                                                                                              | 8000_Mixed | 61 | 58 | 3  | 3 | 3.5 | C |
| 75403011 | Beans, string, green, from fresh, creamed or with cheese sauce                                                    | 8000_Mixed | 61 | 58 | 3  | 2 | 3.5 | C |



|          |                                                                                                                                  |            |    |    |    |   |     |   |
|----------|----------------------------------------------------------------------------------------------------------------------------------|------------|----|----|----|---|-----|---|
| 75403012 | Beans, string, green, from frozen, creamed or with cheese sauce                                                                  | 8000_Mixed | 61 | 58 | 3  | 2 | 3.5 | C |
| 75410500 | Chiles rellenos, cheese-filled                                                                                                   | 8000_Mixed | 61 | 58 | 3  | 2 | 3   | C |
| 27550510 | Sardine sandwich                                                                                                                 | 8000_Mixed | 61 | 57 | 4  | 4 | 4   | A |
| 27311120 | Beef, potatoes, and vegetables, excluding carrots, broccoli, and dark-green leafy; no sauce                                      | 8000_Mixed | 61 | 56 | 5  | 1 | 4   | A |
| 73102230 | Carrots, cooked, NS as to form, creamed                                                                                          | 8000_Mixed | 61 | 56 | 5  | 1 | 3.5 | C |
| 73102232 | Carrots, cooked, from frozen, creamed                                                                                            | 8000_Mixed | 61 | 56 | 5  | 1 | 3.5 | C |
| 75409010 | Cauliflower, NS as to form, creamed                                                                                              | 8000_Mixed | 61 | 56 | 5  | 1 | 3.5 | B |
| 75417022 | Peas, cooked, from frozen, with mushroom sauce                                                                                   | 8000_Mixed | 61 | 56 | 5  | 2 | 4   | B |
| 27150170 | Sweet and sour shrimp                                                                                                            | 8000_Mixed | 61 | 55 | 6  | 2 | 3   | C |
| 27212150 | Beef goulash with noodles                                                                                                        | 8000_Mixed | 61 | 55 | 6  | 1 | 4   | A |
| 27246500 | Meat loaf made with chicken or turkey                                                                                            | 8000_Mixed | 61 | 55 | 6  | 2 | 4   | B |
| 73111030 | Peas and carrots, NS as to form, creamed                                                                                         | 8000_Mixed | 61 | 55 | 6  | 1 | 3.5 | C |
| 73111032 | Peas and carrots, from frozen, creamed                                                                                           | 8000_Mixed | 61 | 55 | 6  | 1 | 3.5 | C |
| 75601100 | Borscht                                                                                                                          | 8000_Mixed | 61 | 55 | 6  | 2 | 3.5 | A |
| 77563010 | Puerto Rican stew                                                                                                                | 8000_Mixed | 61 | 55 | 6  | 1 | 4   | A |
| 27211200 | Beef stew with potatoes, gravy                                                                                                   | 8000_Mixed | 61 | 54 | 7  | 1 | 4   | A |
| 27311320 | Beef stew with potatoes and vegetables excluding carrots, broccoli, and dark-green leafy; tomato-based sauce                     | 8000_Mixed | 61 | 54 | 7  | 1 | 4   | A |
| 75652040 | Vegetable beef soup with noodles or pasta, home recipe                                                                           | 8000_Mixed | 61 | 54 | 7  | 1 | 3.5 | B |
| 77230510 | Cassava fritter stuffed with crab meat, Puerto Rican style                                                                       | 8000_Mixed | 61 | 54 | 7  | 1 | 3.5 | C |
| 27330210 | Lamb or mutton stew with potatoes and vegetables including carrots, broccoli, and/or dark-green leafy; tomato-based sauce        | 8000_Mixed | 61 | 53 | 8  | 1 | 4   | A |
| 27330220 | Lamb or mutton stew with potatoes and vegetables excluding carrots, broccoli, and dark-green leafy; tomato-based sauce           | 8000_Mixed | 61 | 53 | 8  | 1 | 4   | A |
| 58146372 | Pasta with tomato-based sauce, seafood, and added vegetables, home recipe                                                        | 8000_Mixed | 61 | 52 | 9  | 2 | 4   | B |
| 73305020 | Squash, winter, soufflé                                                                                                          | 8000_Mixed | 61 | 52 | 9  | 1 | 4   | B |
| 27416400 | Stir fried beef and vegetables in soy sauce                                                                                      | 8000_Mixed | 61 | 50 | 11 | 1 | 4   | A |
| 42301020 | Peanut butter sandwich, with regular peanut butter, on wheat bread                                                               | 8000_Mixed | 60 | 65 | -5 | 3 | 2.5 | D |
| 42301025 | Peanut butter sandwich, with regular peanut butter, on whole wheat bread                                                         | 8000_Mixed | 60 | 65 | -5 | 3 | 2.5 | D |
| 42301120 | Peanut butter sandwich, with reduced fat peanut butter, on wheat bread                                                           | 8000_Mixed | 60 | 65 | -5 | 3 | 3.5 | C |
| 72308500 | Dark-green leafy vegetable soup, meatless, Asian style                                                                           | 8000_Mixed | 60 | 62 | -2 | 3 | 3.5 | B |
| 58100525 | Enchilada with meat and beans, green-chile or enchilada sauce                                                                    | 8000_Mixed | 60 | 59 | 1  | 3 | 4   | B |
| 27311610 | Beef, potatoes, and vegetables including carrots, broccoli, and/or dark-green leafy; cream sauce, white sauce, or mushroom sauce | 8000_Mixed | 60 | 58 | 2  | 2 | 3.5 | B |
| 77272010 | Puerto Rican pasteles                                                                                                            | 8000_Mixed | 60 | 58 | 2  | 2 | 3.5 | C |
| 27243600 | Chicken or turkey and rice with soy-based sauce                                                                                  | 8000_Mixed | 60 | 57 | 3  | 1 | 3.5 | C |
| 27416450 | Beef and vegetables including carrots, broccoli, and/or dark-green leafy; no potatoes, gravy                                     | 8000_Mixed | 60 | 57 | 3  | 2 | 3.5 | B |
| 58147100 | Pasta with pesto sauce                                                                                                           | 8000_Mixed | 60 | 57 | 3  | 2 | 3   | C |
| 58421020 | Sopa de Fideo Aguada, Mexican style noodle soup, home recipe                                                                     | 8000_Mixed | 60 | 57 | 3  | 1 | 3.5 | A |

|          |                                                                                                                                                                         |            |    |    |    |   |     |   |
|----------|-------------------------------------------------------------------------------------------------------------------------------------------------------------------------|------------|----|----|----|---|-----|---|
| 27120150 | Pork or ham with soy-based sauce                                                                                                                                        | 8000_Mixed | 60 | 56 | 4  | 1 | 3.5 | B |
| 27241010 | Chicken or turkey and potatoes with gravy                                                                                                                               | 8000_Mixed | 60 | 56 | 4  | 1 | 3.5 | C |
| 27242500 | Chicken or turkey and noodles with soy-based sauce                                                                                                                      | 8000_Mixed | 60 | 56 | 4  | 1 | 3.5 | B |
| 27336310 | Venison or deer, noodles, and vegetables excluding carrots, broccoli, and dark-green leafy; tomato-based sauce                                                          | 8000_Mixed | 60 | 56 | 4  | 1 | 3.5 | B |
| 27343520 | Chicken or turkey, noodles, and vegetables excluding carrots, broccoli, and dark-green leafy; tomato-based sauce                                                        | 8000_Mixed | 60 | 56 | 4  | 1 | 3.5 | C |
| 58146732 | Pasta, whole grain, with cream sauce, poultry, and added vegetables, home recipe                                                                                        | 8000_Mixed | 60 | 56 | 4  | 2 | 3.5 | C |
| 58165410 | Rice, brown, with vegetables, cheese and/or cream based sauce, no added fat                                                                                             | 8000_Mixed | 60 | 56 | 4  | 2 | 3.5 | C |
| 75409012 | Cauliflower, from frozen, creamed                                                                                                                                       | 8000_Mixed | 60 | 56 | 4  | 1 | 3.5 | B |
| 27146300 | Chicken or turkey parmigiana                                                                                                                                            | 8000_Mixed | 60 | 55 | 5  | 2 | 3.5 | C |
| 27232000 | Lamb or mutton and potatoes with tomato-based sauce                                                                                                                     | 8000_Mixed | 60 | 55 | 5  | 1 | 4   | B |
| 27250810 | Fish and rice with tomato-based sauce                                                                                                                                   | 8000_Mixed | 60 | 55 | 5  | 1 | 3.5 | B |
| 75439010 | Vegetable stew without meat                                                                                                                                             | 8000_Mixed | 60 | 54 | 6  | 2 | 3.5 | B |
| 28310170 | Beef broth, without tomato, home recipe                                                                                                                                 | 8000_Mixed | 60 | 53 | 7  | 1 | 3.5 | B |
| 28340550 | Sweet and sour soup                                                                                                                                                     | 8000_Mixed | 60 | 53 | 7  | 2 | 3.5 | C |
| 58403040 | Chicken or turkey noodle soup, home recipe                                                                                                                              | 8000_Mixed | 60 | 53 | 7  | 1 | 3.5 | B |
| 27448030 | Chicken or turkey fricassee, no sauce, no potatoes, Puerto Rican style                                                                                                  | 8000_Mixed | 60 | 52 | 8  | 1 | 3.5 | D |
| 28310320 | Beef noodle soup, Puerto Rican style                                                                                                                                    | 8000_Mixed | 60 | 51 | 9  | 1 | 3.5 | B |
| 75142550 | Cucumber salad, made with Italian dressing                                                                                                                              | 8000_Mixed | 59 | 62 | -3 | 2 | 3.5 | C |
| 75651150 | Vegetable noodle soup, reduced sodium, canned, prepared with water or ready-to-serve                                                                                    | 8000_Mixed | 59 | 62 | -3 | 4 | 4   | A |
| 27446332 | Chicken or turkey, breaded, fried, garden salad with cheese, chicken and/or turkey, cheese, lettuce and/or greens, tomato and/or carrots, other vegetables, no dressing | 8000_Mixed | 59 | 61 | -2 | 3 | 4   | A |
| 58100725 | Enchilada with beans, green-chile or enchilada sauce                                                                                                                    | 8000_Mixed | 59 | 58 | 1  | 3 | 4   | A |
| 27341040 | Chicken or turkey, potatoes, and vegetables excluding carrots, broccoli, and dark-green leafy; cream sauce, white sauce, or mushroom sauce                              | 8000_Mixed | 59 | 57 | 2  | 2 | 3.5 | C |
| 27414100 | Beef with vegetables including carrots, broccoli, and/or dark-green leafy; no potatoes, mushroom sauce                                                                  | 8000_Mixed | 59 | 57 | 2  | 2 | 3.5 | B |
| 27348100 | Chicken fricassee, Puerto Rican style                                                                                                                                   | 8000_Mixed | 59 | 56 | 3  | 2 | 3.5 | D |
| 58100520 | Enchilada with meat and beans, red-chile or enchilada sauce                                                                                                             | 8000_Mixed | 59 | 56 | 3  | 3 | 4   | B |
| 58117510 | Hayacas, Puerto Rican style                                                                                                                                             | 8000_Mixed | 59 | 56 | 3  | 3 | 4   | B |
| 58124250 | Spanakopitta                                                                                                                                                            | 8000_Mixed | 59 | 56 | 3  | 3 | 3   | C |
| 58164800 | Rice, brown, with cheese and/or cream based sauce, NS as to fat                                                                                                         | 8000_Mixed | 59 | 56 | 3  | 2 | 3.5 | C |
| 58164820 | Rice, brown, with cheese and/or cream based sauce, fat added                                                                                                            | 8000_Mixed | 59 | 56 | 3  | 2 | 3.5 | C |
| 58100630 | Enchilada with chicken, red-chile or enchilada sauce                                                                                                                    | 8000_Mixed | 59 | 55 | 4  | 3 | 4   | B |
| 58101830 | Mexican casserole made with ground beef, tomato sauce, cheese, taco seasonings, and corn chips                                                                          | 8000_Mixed | 59 | 55 | 4  | 3 | 3   | D |
| 75407010 | Cabbage, creamed                                                                                                                                                        | 8000_Mixed | 59 | 55 | 4  | 1 | 3.5 | B |

|          |                                                                                                                    |            |    |    |    |   |     |   |
|----------|--------------------------------------------------------------------------------------------------------------------|------------|----|----|----|---|-----|---|
| 27320070 | Ham or pork, noodles, and vegetables including carrots, broccoli, and/or dark-green leafy; tomato-based sauce      | 8000_Mixed | 59 | 54 | 5  | 1 | 3.5 | C |
| 58165470 | Rice, brown, with vegetables, soy-based sauce, no added fat                                                        | 8000_Mixed | 59 | 54 | 5  | 1 | 3.5 | C |
| 71931010 | Cassava with creole sauce, Puerto Rican style                                                                      | 8000_Mixed | 59 | 54 | 5  | 1 | 4   | A |
| 27250300 | Mackerel cake or patty                                                                                             | 8000_Mixed | 59 | 52 | 7  | 3 | 3.5 | D |
| 27311420 | Beef stew with potatoes and vegetables excluding carrots, broccoli, and dark-green leafy; gravy                    | 8000_Mixed | 59 | 52 | 7  | 1 | 4   | A |
| 58146362 | Pasta with tomato-based sauce and seafood, home recipe                                                             | 8000_Mixed | 59 | 52 | 7  | 2 | 3.5 | B |
| 28340680 | Chicken or turkey and corn hominy soup, home recipe, Mexican style                                                 | 8000_Mixed | 59 | 51 | 8  | 1 | 3.5 | A |
| 58117410 | Codfish fritter, Puerto Rican style                                                                                | 8000_Mixed | 59 | 51 | 8  | 1 | 4   | A |
| 72125240 | Spinach souffle                                                                                                    | 8000_Mixed | 59 | 51 | 8  | 1 | 3.5 | C |
| 27250122 | Shrimp and noodles with gravy                                                                                      | 8000_Mixed | 59 | 50 | 9  | 2 | 3.5 | B |
| 27430510 | Veal goulash with vegetables including carrots, broccoli, and/or dark-green leafy; no potatoes, tomato-based sauce | 8000_Mixed | 59 | 50 | 9  | 1 | 4   | A |
| 27462000 | Stewed chitterlings, Puerto Rican style                                                                            | 8000_Mixed | 59 | 50 | 9  | 1 | 3.5 | C |
| 28310420 | Beef and rice soup, Puerto Rican style                                                                             | 8000_Mixed | 59 | 50 | 9  | 1 | 3.5 | B |
| 28340800 | Chicken or turkey soup with vegetables and fruit, Asian Style                                                      | 8000_Mixed | 59 | 50 | 9  | 2 | 3   | C |
| 27350410 | Tuna noodle casserole with vegetables and mushroom sauce                                                           | 8000_Mixed | 59 | 49 | 10 | 2 | 3.5 | B |
| 32105220 | Pork egg foo yung                                                                                                  | 8000_Mixed | 59 | 49 | 10 | 1 | 3.5 | B |
| 32105240 | Beef egg foo yung                                                                                                  | 8000_Mixed | 59 | 49 | 10 | 1 | 3.5 | B |
| 58151440 | Sushi, topped with tuna                                                                                            | 8000_Mixed | 59 | 49 | 10 | 1 | 4   | A |
| 27250260 | Lobster with bread stuffing, baked                                                                                 | 8000_Mixed | 59 | 48 | 11 | 2 | 2   | D |
| 58151200 | Sushi roll, salmon                                                                                                 | 8000_Mixed | 59 | 47 | 12 | 1 | 3.5 | C |
| 75416600 | Pea salad with cheese                                                                                              | 8000_Mixed | 58 | 64 | -6 | 3 | 3.5 | C |
| 42302020 | Peanut butter and jelly sandwich, with regular peanut butter, regular jelly, on wheat bread                        | 8000_Mixed | 58 | 62 | -4 | 3 | 2.5 | D |
| 42302025 | Peanut butter and jelly sandwich, with regular peanut butter, regular jelly, on whole wheat bread                  | 8000_Mixed | 58 | 62 | -4 | 3 | 2.5 | D |
| 75650990 | Minestrone soup, reduced sodium, canned or ready-to-serve                                                          | 8000_Mixed | 58 | 62 | -4 | 4 | 4   | A |
| 58146301 | Pasta with tomato-based sauce, and added vegetables, restaurant                                                    | 8000_Mixed | 58 | 59 | -1 | 2 | 3.5 | C |
| 58146351 | Pasta with tomato-based sauce, poultry, and added vegetables, restaurant                                           | 8000_Mixed | 58 | 57 | 1  | 2 | 3.5 | C |
| 58162090 | Stuffed pepper, with meat                                                                                          | 8000_Mixed | 58 | 57 | 1  | 2 | 3.5 | C |
| 27540206 | Chicken fillet sandwich, grilled, on wheat bun, with cheese                                                        | 8000_Mixed | 58 | 56 | 2  | 3 | 4   | C |
| 72308000 | Dark-green leafy vegetable soup with meat, Asian style                                                             | 8000_Mixed | 58 | 56 | 2  | 2 | 4   | A |
| 27246300 | Chicken or turkey cake, patty, or croquette                                                                        | 8000_Mixed | 58 | 55 | 3  | 2 | 3.5 | D |
| 27320150 | Pork, potatoes, and vegetables excluding carrots, broccoli, and dark-green leafy; gravy                            | 8000_Mixed | 58 | 55 | 3  | 2 | 3.5 | B |
| 27442120 | Chicken or turkey and vegetables excluding carrots, broccoli, and dark-green leafy; no potatoes, gravy             | 8000_Mixed | 58 | 55 | 3  | 2 | 3.5 | C |
| 27446230 | Chicken or turkey salad, made with mayonnaise-type salad dressing                                                  | 8000_Mixed | 58 | 55 | 3  | 2 | 3.5 | C |
| 41311040 | Lentil curry with rice                                                                                             | 8000_Mixed | 58 | 55 | 3  | 1 | 3.5 | C |
| 27115000 | Beef with soy-based sauce                                                                                          | 8000_Mixed | 58 | 54 | 4  | 1 | 3.5 | B |

|          |                                                                                                                               |            |    |    |    |   |     |   |
|----------|-------------------------------------------------------------------------------------------------------------------------------|------------|----|----|----|---|-----|---|
| 27150325 | Fish curry with rice                                                                                                          | 8000_Mixed | 58 | 54 | 4  | 1 | 3.5 | C |
| 58162110 | Stuffed pepper, with rice and meat                                                                                            | 8000_Mixed | 58 | 54 | 4  | 2 | 3.5 | C |
| 27242400 | Chicken or turkey and noodles with tomato-based sauce                                                                         | 8000_Mixed | 58 | 53 | 5  | 1 | 3.5 | C |
| 27313210 | Beef, noodles, and vegetables including carrots, broccoli, and/or dark-green leafy; tomato-based sauce                        | 8000_Mixed | 58 | 53 | 5  | 1 | 3.5 | C |
| 27341045 | Chicken or turkey, potatoes, and vegetables including carrots, broccoli, and/or dark-green leafy; cheese sauce                | 8000_Mixed | 58 | 53 | 5  | 2 | 3.5 | B |
| 58162130 | Stuffed tomato, with rice and meat                                                                                            | 8000_Mixed | 58 | 53 | 5  | 1 | 4   | B |
| 27111410 | Chili con carne with beans                                                                                                    | 8000_Mixed | 58 | 52 | 6  | 3 | 4   | C |
| 27211000 | Beef and potatoes, no sauce                                                                                                   | 8000_Mixed | 58 | 52 | 6  | 1 | 4   | A |
| 27311510 | Shepherd's pie with beef                                                                                                      | 8000_Mixed | 58 | 52 | 6  | 2 | 4   | A |
| 27418110 | Seasoned shredded soup meat                                                                                                   | 8000_Mixed | 58 | 52 | 6  | 2 | 4   | A |
| 77205610 | Ripe plantain meat pie, Puerto Rican style                                                                                    | 8000_Mixed | 58 | 52 | 6  | 2 | 3.5 | D |
| 75417010 | Peas, NS as to form, creamed                                                                                                  | 8000_Mixed | 58 | 51 | 7  | 1 | 3.5 | C |
| 75417012 | Peas, from frozen, creamed                                                                                                    | 8000_Mixed | 58 | 51 | 7  | 1 | 3.5 | C |
| 75652050 | Vegetable beef soup with rice, home recipe                                                                                    | 8000_Mixed | 58 | 51 | 7  | 1 | 3.5 | B |
| 27430500 | Veal goulash with vegetables excluding carrots, broccoli, and dark-green leafy; no potatoes, tomato-based sauce               | 8000_Mixed | 58 | 50 | 8  | 1 | 4   | A |
| 27460710 | Livers, chicken, chopped, with eggs and onion                                                                                 | 8000_Mixed | 58 | 50 | 8  | 2 | 1.5 | E |
| 28320150 | Pork, vegetable soup with potatoes, stew type                                                                                 | 8000_Mixed | 58 | 50 | 8  | 2 | 4   | A |
| 27250124 | Shrimp and noodles with mushroom sauce                                                                                        | 8000_Mixed | 58 | 49 | 9  | 2 | 3.5 | B |
| 27350080 | Tuna noodle casserole with vegetables, cream or white sauce                                                                   | 8000_Mixed | 58 | 49 | 9  | 2 | 3.5 | B |
| 27150050 | Fish timbale or mousse                                                                                                        | 8000_Mixed | 58 | 45 | 13 | 2 | 3   | C |
| 27540139 | Chicken fillet sandwich, from school cafeteria                                                                                | 8000_Mixed | 57 | 64 | -7 | 4 | 4   | B |
| 58146315 | Pasta with sauce and meat, from school lunch                                                                                  | 8000_Mixed | 57 | 64 | -7 | 4 | 4   | A |
| 75141000 | Cabbage salad or coleslaw, made with coleslaw dressing                                                                        | 8000_Mixed | 57 | 64 | -7 | 3 | 4   | B |
| 41811950 | Swiss steak, with gravy, meatless                                                                                             | 8000_Mixed | 57 | 60 | -3 | 4 | 3.5 | C |
| 27446200 | Chicken or turkey salad, made with mayonnaise                                                                                 | 8000_Mixed | 57 | 59 | -2 | 3 | 3.5 | C |
| 42302165 | Peanut butter and jelly sandwich, with reduced fat peanut butter, reduced sugar jelly, on whole wheat bread                   | 8000_Mixed | 57 | 59 | -2 | 3 | 3.5 | D |
| 27416250 | Beef salad                                                                                                                    | 8000_Mixed | 57 | 58 | -1 | 3 | 3.5 | C |
| 27446220 | Chicken or turkey salad with egg                                                                                              | 8000_Mixed | 57 | 58 | -1 | 3 | 3.5 | C |
| 58146341 | Pasta with tomato-based sauce and poultry, restaurant                                                                         | 8000_Mixed | 57 | 57 | 0  | 2 | 3   | C |
| 58148130 | Macaroni or pasta salad with tuna                                                                                             | 8000_Mixed | 57 | 57 | 0  | 2 | 3.5 | C |
| 58148140 | Macaroni or pasta salad with crab meat                                                                                        | 8000_Mixed | 57 | 57 | 0  | 2 | 3.5 | C |
| 27311620 | Beef, potatoes, and vegetables excluding carrots, broccoli, and dark-green leafy; cream sauce, white sauce, or mushroom sauce | 8000_Mixed | 57 | 55 | 2  | 2 | 3.5 | B |
| 27446235 | Chicken or turkey salad, made with light mayonnaise-type salad dressing                                                       | 8000_Mixed | 57 | 55 | 2  | 2 | 3.5 | C |
| 27540260 | Chicken fillet, broiled, sandwich, on oat bran bun, with lettuce, tomato, spread                                              | 8000_Mixed | 57 | 55 | 2  | 3 | 4   | B |
| 58148160 | Macaroni or pasta salad with tuna and egg                                                                                     | 8000_Mixed | 57 | 55 | 2  | 2 | 3.5 | C |
| 75403022 | Beans, string, green, cooked, from frozen, with mushroom sauce                                                                | 8000_Mixed | 57 | 55 | 2  | 3 | 3.5 | B |

|          |                                                                                                                       |            |    |    |    |   |     |   |
|----------|-----------------------------------------------------------------------------------------------------------------------|------------|----|----|----|---|-----|---|
| 75440610 | Vegetable curry with rice                                                                                             | 8000_Mixed | 57 | 55 | 2  | 1 | 3.5 | C |
| 27311605 | Beef, potatoes, and vegetables excluding carrots, broccoli, and dark-green leafy; gravy                               | 8000_Mixed | 57 | 54 | 3  | 2 | 3.5 | B |
| 27345510 | Chicken or turkey, rice, and vegetables including carrots, broccoli, and/or dark-green leafy; tomato-based sauce      | 8000_Mixed | 57 | 54 | 3  | 1 | 3.5 | C |
| 27446225 | Chicken or turkey salad, made with light mayonnaise                                                                   | 8000_Mixed | 57 | 54 | 3  | 2 | 3.5 | C |
| 28150370 | Flounder in cream sauce with potatoes, carrots (diet frozen meal)                                                     | 8000_Mixed | 57 | 54 | 3  | 4 | 3.5 | C |
| 58100710 | Enchilada with beans, meatless                                                                                        | 8000_Mixed | 57 | 54 | 3  | 3 | 4.5 | A |
| 58132110 | Spaghetti with tomato sauce, meatless                                                                                 | 8000_Mixed | 57 | 54 | 3  | 2 | 3.5 | C |
| 58132340 | Spaghetti with tomato sauce and vegetables                                                                            | 8000_Mixed | 57 | 54 | 3  | 2 | 3.5 | B |
| 58132910 | Spaghetti with tomato sauce and poultry                                                                               | 8000_Mixed | 57 | 54 | 3  | 2 | 3.5 | B |
| 58146100 | Pasta with tomato sauce, meatless                                                                                     | 8000_Mixed | 57 | 54 | 3  | 2 | 3.5 | C |
| 58146692 | Pasta, whole grain, with cream sauce, and added vegetables, home recipe                                               | 8000_Mixed | 57 | 54 | 3  | 2 | 3.5 | C |
| 27213500 | Beef and rice with soy-based sauce                                                                                    | 8000_Mixed | 57 | 53 | 4  | 1 | 3.5 | B |
| 27446400 | Chicken or turkey and vegetables including carrots, broccoli, and/or dark-green leafy; no potatoes, cheese sauce      | 8000_Mixed | 57 | 53 | 4  | 2 | 3.5 | C |
| 58146160 | Pasta with vegetables, no sauce or dressing                                                                           | 8000_Mixed | 57 | 53 | 4  | 1 | 4   | B |
| 58148150 | Macaroni or pasta salad with shrimp                                                                                   | 8000_Mixed | 57 | 53 | 4  | 2 | 3.5 | C |
| 58164810 | Rice, brown, with cheese and/or cream based sauce, no added fat                                                       | 8000_Mixed | 57 | 53 | 4  | 2 | 3.5 | C |
| 27218210 | Beef stew with potatoes, Puerto Rican style                                                                           | 8000_Mixed | 57 | 52 | 5  | 1 | 3.5 | D |
| 27446245 | Chicken or turkey salad, made with light creamy dressing                                                              | 8000_Mixed | 57 | 52 | 5  | 2 | 3.5 | C |
| 75410010 | Celery, creamed                                                                                                       | 8000_Mixed | 57 | 52 | 5  | 1 | 3.5 | C |
| 27343010 | Chicken or turkey, noodles, and vegetables including carrots, broccoli, and/or dark-green leafy; no sauce             | 8000_Mixed | 57 | 51 | 6  | 1 | 3.5 | B |
| 75402020 | Beans, lima, immature, cooked, NS as to form, with mushroom sauce                                                     | 8000_Mixed | 57 | 51 | 6  | 2 | 4   | B |
| 75450510 | Vegetable combination, excluding carrots, broccoli, and dark-green leafy; cooked, with cream sauce                    | 8000_Mixed | 57 | 51 | 6  | 1 | 3.5 | C |
| 75460810 | Vegetable combinations, excluding carrots, broccoli, and dark-green leafy; cooked, with butter sauce and pasta        | 8000_Mixed | 57 | 51 | 6  | 1 | 4   | A |
| 27121010 | Stewed pork, Puerto Rican style                                                                                       | 8000_Mixed | 57 | 50 | 7  | 1 | 3.5 | D |
| 27411120 | Swiss steak                                                                                                           | 8000_Mixed | 57 | 50 | 7  | 1 | 3.5 | B |
| 58402100 | Beef noodle soup, home recipe                                                                                         | 8000_Mixed | 57 | 50 | 7  | 1 | 3.5 | B |
| 27330110 | Lamb or mutton stew with potatoes and vegetables excluding carrots, broccoli, and dark-green leafy; gravy             | 8000_Mixed | 57 | 49 | 8  | 1 | 4   | A |
| 27335100 | Rabbit stew with potatoes and vegetables                                                                              | 8000_Mixed | 57 | 49 | 8  | 1 | 3.5 | B |
| 27211110 | Beef stew with potatoes, tomato-based sauce, Mexican style                                                            | 8000_Mixed | 57 | 48 | 9  | 1 | 4   | B |
| 27422010 | Pork chop stewed with vegetables, Puerto Rican style                                                                  | 8000_Mixed | 57 | 48 | 9  | 1 | 4   | B |
| 27430410 | Lamb or mutton stew with vegetables excluding carrots, broccoli, and dark-green leafy; no potatoes, gravy             | 8000_Mixed | 57 | 47 | 10 | 1 | 4   | A |
| 58134210 | Stuffed shells, with chicken, with tomato sauce                                                                       | 8000_Mixed | 57 | 47 | 10 | 1 | 4   | A |
| 27446362 | Chicken or turkey, breaded, fried, caesar garden salad, chicken and/or turkey, lettuce, tomatoes, cheese, no dressing | 8000_Mixed | 56 | 59 | -3 | 4 | 4   | A |

|          |                                                                                                                                                                                                   |            |    |    |    |   |     |   |
|----------|---------------------------------------------------------------------------------------------------------------------------------------------------------------------------------------------------|------------|----|----|----|---|-----|---|
| 42302110 | Peanut butter and jelly sandwich, with regular peanut butter, reduced sugar jelly, on wheat bread                                                                                                 | 8000_Mixed | 56 | 58 | -2 | 3 | 2.5 | D |
| 42302115 | Peanut butter and jelly sandwich, with regular peanut butter, reduced sugar jelly, on whole wheat bread                                                                                           | 8000_Mixed | 56 | 58 | -2 | 3 | 2.5 | D |
| 42302160 | Peanut butter and jelly sandwich, with reduced fat peanut butter, reduced sugar jelly, on wheat bread                                                                                             | 8000_Mixed | 56 | 58 | -2 | 3 | 3.5 | D |
| 27446240 | Chicken or turkey salad, made with creamy dressing                                                                                                                                                | 8000_Mixed | 56 | 57 | -1 | 3 | 3   | C |
| 41601030 | Black bean soup, home recipe, canned or ready-to-serve                                                                                                                                            | 8000_Mixed | 56 | 57 | -1 | 4 | 3.5 | C |
| 14620310 | Topping from vegetable pizza                                                                                                                                                                      | 8000_Mixed | 56 | 56 | 0  | 3 | 3   | D |
| 58146150 | Pasta with tomato-based sauce and cheese                                                                                                                                                          | 8000_Mixed | 56 | 54 | 2  | 2 | 3.5 | C |
| 73102253 | Carrots, cooked, from canned, with cheese sauce                                                                                                                                                   | 8000_Mixed | 56 | 54 | 2  | 3 | 3   | C |
| 74602300 | Tomato soup, canned, reduced sodium, prepared with milk                                                                                                                                           | 8000_Mixed | 56 | 54 | 2  | 3 | 3.5 | A |
| 75141300 | Cabbage, Chinese, salad, with dressing                                                                                                                                                            | 8000_Mixed | 56 | 54 | 2  | 2 | 3   | C |
| 75403013 | Beans, string, green, from canned, creamed or with cheese sauce                                                                                                                                   | 8000_Mixed | 56 | 54 | 2  | 2 | 3.5 | C |
| 58100635 | Enchilada with chicken, green-chile or enchilada sauce                                                                                                                                            | 8000_Mixed | 56 | 53 | 3  | 2 | 4   | B |
| 27212500 | Beef and noodles with soy-based sauce                                                                                                                                                             | 8000_Mixed | 56 | 52 | 4  | 1 | 3.5 | B |
| 27220510 | Ham or pork and potatoes with gravy                                                                                                                                                               | 8000_Mixed | 56 | 52 | 4  | 2 | 3.5 | B |
| 75409011 | Cauliflower, from fresh, creamed                                                                                                                                                                  | 8000_Mixed | 56 | 52 | 4  | 1 | 3.5 | C |
| 27313220 | Beef, noodles, and vegetables excluding carrots, broccoli, and dark-green leafy; tomato-based sauce                                                                                               | 8000_Mixed | 56 | 51 | 5  | 1 | 3.5 | C |
| 27330010 | Shepherd's pie with lamb                                                                                                                                                                          | 8000_Mixed | 56 | 51 | 5  | 2 | 4   | A |
| 58100610 | Enchilada with chicken and beans, tomato-based sauce                                                                                                                                              | 8000_Mixed | 56 | 51 | 5  | 3 | 4   | A |
| 58132460 | Spaghetti with tomato sauce and meatballs made with spinach noodles, or spaghetti with meat sauce made with spinach noodles, or spaghetti with meat sauce and meatballs made with spinach noodles | 8000_Mixed | 56 | 51 | 5  | 2 | 3.5 | C |
| 73111033 | Peas and carrots, from canned, creamed                                                                                                                                                            | 8000_Mixed | 56 | 51 | 5  | 2 | 3.5 | C |
| 75415011 | Onions, from fresh, creamed                                                                                                                                                                       | 8000_Mixed | 56 | 51 | 5  | 1 | 3.5 | C |
| 27313110 | Beef chow mein or chop suey with noodles                                                                                                                                                          | 8000_Mixed | 56 | 50 | 6  | 1 | 4   | A |
| 58164870 | Rice, brown, with soy-based sauce, no added fat                                                                                                                                                   | 8000_Mixed | 56 | 50 | 6  | 1 | 3   | C |
| 75402012 | Beans, lima, immature, from frozen, creamed or with cheese sauce                                                                                                                                  | 8000_Mixed | 56 | 50 | 6  | 2 | 4   | A |
| 27141050 | Stewed chicken with tomato-based sauce, Mexican style                                                                                                                                             | 8000_Mixed | 56 | 49 | 7  | 2 | 3.5 | B |
| 27331150 | Veal fricassee, Puerto Rican style                                                                                                                                                                | 8000_Mixed | 56 | 49 | 7  | 2 | 3.5 | C |
| 27446255 | Chicken or turkey salad, made with light Italian dressing                                                                                                                                         | 8000_Mixed | 56 | 49 | 7  | 2 | 3.5 | C |
| 27448020 | Chicken or turkey fricassee, with sauce, no potatoes, potatoes reported separately, Puerto Rican style                                                                                            | 8000_Mixed | 56 | 49 | 7  | 2 | 3.5 | D |
| 28310230 | Meatball soup, home recipe, Mexican style                                                                                                                                                         | 8000_Mixed | 56 | 49 | 7  | 2 | 4   | B |
| 28340590 | Chicken or turkey corn soup with noodles, home recipe                                                                                                                                             | 8000_Mixed | 56 | 49 | 7  | 2 | 3.5 | C |
| 58115210 | Taco with crab meat, Puerto Rican style                                                                                                                                                           | 8000_Mixed | 56 | 48 | 8  | 2 | 3   | D |
| 27221150 | Pork stew, with potatoes, tomato-based sauce, Mexican style                                                                                                                                       | 8000_Mixed | 56 | 47 | 9  | 1 | 3.5 | B |
| 27330030 | Lamb or mutton stew with potatoes and vegetables including carrots, broccoli, and/or dark-green leafy; gravy                                                                                      | 8000_Mixed | 56 | 47 | 9  | 1 | 4   | A |
| 27416100 | Beef and vegetables, Hawaiian style                                                                                                                                                               | 8000_Mixed | 56 | 47 | 9  | 1 | 3.5 | C |

|          |                                                                                                               |            |    |    |    |   |     |   |
|----------|---------------------------------------------------------------------------------------------------------------|------------|----|----|----|---|-----|---|
| 27430400 | Lamb or mutton stew with vegetables including carrots, broccoli, and/or dark-green leafy; no potatoes, gravy  | 8000_Mixed | 56 | 47 | 9  | 1 | 4   | B |
| 58155310 | Paella with meat, Valenciana style                                                                            | 8000_Mixed | 56 | 47 | 9  | 1 | 2   | D |
| 27144000 | Chicken or turkey with mushroom sauce                                                                         | 8000_Mixed | 56 | 46 | 10 | 1 | 4   | B |
| 28340750 | Hot and sour soup                                                                                             | 8000_Mixed | 56 | 46 | 10 | 1 | 3   | C |
| 58151190 | Sushi roll, eel                                                                                               | 8000_Mixed | 56 | 46 | 10 | 1 | 3.5 | C |
| 27250550 | Seafood souffle                                                                                               | 8000_Mixed | 56 | 41 | 15 | 2 | 3   | D |
| 58151430 | Sushi, topped with shrimp                                                                                     | 8000_Mixed | 56 | 39 | 17 | 1 | 3.5 | B |
| 58302080 | Noodles with vegetables in tomato-based sauce, diet frozen meal                                               | 8000_Mixed | 55 | 60 | -5 | 4 | 4   | A |
| 75609050 | Pea soup, canned, low sodium, prepared with water                                                             | 8000_Mixed | 55 | 59 | -4 | 4 | 4   | A |
| 41812850 | Vegetarian stroganoff                                                                                         | 8000_Mixed | 55 | 54 | 1  | 3 | 3   | C |
| 72302000 | Broccoli soup, prepared with milk, home recipe, canned or ready-to-serve                                      | 8000_Mixed | 55 | 54 | 1  | 3 | 3   | C |
| 58137220 | Pad Thai, meatless                                                                                            | 8000_Mixed | 55 | 53 | 2  | 2 | 3.5 | C |
| 72302100 | Broccoli cheese soup, prepared with milk, home recipe, canned, or ready-to-serve                              | 8000_Mixed | 55 | 53 | 2  | 3 | 3   | C |
| 75418020 | Squash, summer, casserole with tomato and cheese                                                              | 8000_Mixed | 55 | 53 | 2  | 3 | 4   | A |
| 27446250 | Chicken or turkey salad, made with Italian dressing                                                           | 8000_Mixed | 55 | 52 | 3  | 2 | 3.5 | C |
| 58101710 | Taco or tostada with beans, meatless, with lettuce, tomato and salsa                                          | 8000_Mixed | 55 | 52 | 3  | 3 | 4   | A |
| 27320340 | Pork, rice, and vegetables including carrots, broccoli, and/or dark-green leafy; tomato-based sauce           | 8000_Mixed | 55 | 51 | 4  | 1 | 3.5 | C |
| 27345520 | Chicken or turkey, rice, and vegetables excluding carrots, broccoli, and dark-green leafy; tomato-based sauce | 8000_Mixed | 55 | 51 | 4  | 1 | 3.5 | C |
| 28153010 | Shrimp and clams in tomato-based sauce, with noodles, frozen meal                                             | 8000_Mixed | 55 | 51 | 4  | 4 | 3.5 | B |
| 58100500 | Enchilada, no sauce                                                                                           | 8000_Mixed | 55 | 51 | 4  | 2 | 4   | B |
| 58100530 | Enchilada with meat, red-chile or enchilada sauce                                                             | 8000_Mixed | 55 | 51 | 4  | 2 | 4   | B |
| 58146222 | Pasta with tomato-based sauce, home recipe                                                                    | 8000_Mixed | 55 | 51 | 4  | 2 | 3.5 | B |
| 58146722 | Pasta, whole grain, with cream sauce and poultry, home recipe                                                 | 8000_Mixed | 55 | 51 | 4  | 2 | 3.5 | C |
| 73102233 | Carrots, cooked, from canned, creamed                                                                         | 8000_Mixed | 55 | 51 | 4  | 1 | 3   | C |
| 75418051 | Squash, summer, from fresh, creamed                                                                           | 8000_Mixed | 55 | 51 | 4  | 1 | 3.5 | B |
| 27341050 | Chicken or turkey, potatoes, and vegetables excluding carrots, broccoli, and dark-green leafy; cheese sauce   | 8000_Mixed | 55 | 50 | 5  | 2 | 3.5 | B |
| 27416500 | Beef and vegetables excluding carrots, broccoli, and dark-green leafy; no potatoes, gravy                     | 8000_Mixed | 55 | 50 | 5  | 2 | 3.5 | B |
| 28350210 | Clam chowder, NS as to Manhattan or New England style                                                         | 8000_Mixed | 55 | 50 | 5  | 3 | 3.5 | C |
| 28355120 | Clam chowder, New England, prepared with milk                                                                 | 8000_Mixed | 55 | 50 | 5  | 3 | 3.5 | C |
| 58104150 | Nachos with chicken and cheese                                                                                | 8000_Mixed | 55 | 50 | 5  | 3 | 4   | B |
| 75418050 | Squash, summer, NS as to form, creamed                                                                        | 8000_Mixed | 55 | 50 | 5  | 1 | 3.5 | B |
| 27133010 | Stewed goat, Puerto Rican style                                                                               | 8000_Mixed | 55 | 49 | 6  | 2 | 2   | D |
| 27135110 | Veal parmigiana                                                                                               | 8000_Mixed | 55 | 49 | 6  | 2 | 3.5 | D |
| 27343910 | Chicken or turkey chow mein or chop suey with noodles                                                         | 8000_Mixed | 55 | 49 | 6  | 1 | 4   | B |
| 27360080 | Chow mein or chop suey, NS as to type of meat, with noodles                                                   | 8000_Mixed | 55 | 49 | 6  | 1 | 4   | B |

|          |                                                                                                                 |            |    |    |    |   |     |   |
|----------|-----------------------------------------------------------------------------------------------------------------|------------|----|----|----|---|-----|---|
| 27430580 | Veal with vegetables including carrots, broccoli, and/or dark-green leafy; no potatoes, cream or white sauce    | 8000_Mixed | 55 | 49 | 6  | 2 | 3.5 | C |
| 41610100 | White bean soup, Puerto Rican style (Sopon de habichuelas blancas)                                              | 8000_Mixed | 55 | 49 | 6  | 1 | 3   | C |
| 58146352 | Pasta with tomato-based sauce, poultry, and added vegetables, home recipe                                       | 8000_Mixed | 55 | 49 | 6  | 1 | 4   | A |
| 75415010 | Onions, NS as to form, creamed                                                                                  | 8000_Mixed | 55 | 49 | 6  | 1 | 3.5 | C |
| 75418053 | Squash, summer, from canned, creamed                                                                            | 8000_Mixed | 55 | 49 | 6  | 1 | 3.5 | B |
| 27211300 | Beef, roast, hash                                                                                               | 8000_Mixed | 55 | 48 | 7  | 2 | 3.5 | C |
| 27343020 | Chicken or turkey, noodles, and vegetables excluding carrots, broccoli, and dark-green leafy; no sauce          | 8000_Mixed | 55 | 48 | 7  | 1 | 3.5 | B |
| 27332100 | Veal stew with potatoes and vegetables including carrots, broccoli, and/or dark-green leafy; tomato-based sauce | 8000_Mixed | 55 | 47 | 8  | 1 | 4   | A |
| 27111300 | Beef stew, no potatoes, tomato-based sauce, Mexican style                                                       | 8000_Mixed | 55 | 46 | 9  | 1 | 4   | B |
| 27120130 | Pork stew, no potatoes, tomato-based sauce, Mexican style                                                       | 8000_Mixed | 55 | 46 | 9  | 1 | 4   | B |
| 27315250 | Stuffed cabbage rolls with beef and rice                                                                        | 8000_Mixed | 55 | 46 | 9  | 1 | 4   | B |
| 27332110 | Veal stew with potatoes and vegetables excluding carrots, broccoli, and/or dark-green leafy; tomato-based sauce | 8000_Mixed | 55 | 46 | 9  | 1 | 4   | A |
| 28310150 | Oxtail soup                                                                                                     | 8000_Mixed | 55 | 46 | 9  | 1 | 3.5 | B |
| 58117310 | Kibby, Puerto Rican style                                                                                       | 8000_Mixed | 55 | 46 | 9  | 1 | 3.5 | C |
| 27250630 | Tuna noodle casserole with mushroom sauce                                                                       | 8000_Mixed | 55 | 45 | 10 | 2 | 3.5 | C |
| 27142000 | Chicken with gravy                                                                                              | 8000_Mixed | 55 | 44 | 11 | 1 | 4   | B |
| 58146623 | Pasta, whole grain, with tomato-based sauce and meat, ready-to-heat                                             | 8000_Mixed | 54 | 60 | -6 | 4 | 3.5 | C |
| 58146331 | Pasta with tomato-based sauce, meat, and added vegetables, restaurant                                           | 8000_Mixed | 54 | 53 | 1  | 2 | 3.5 | C |
| 75403023 | Beans, string, green, cooked, from canned, with mushroom sauce                                                  | 8000_Mixed | 54 | 53 | 1  | 3 | 3.5 | C |
| 58146321 | Pasta with tomato-based sauce and meat, restaurant                                                              | 8000_Mixed | 54 | 52 | 2  | 2 | 3   | C |
| 77250110 | Stuffed tannier fritters, Puerto Rican style                                                                    | 8000_Mixed | 54 | 52 | 2  | 2 | 2.5 | E |
| 27414200 | Beef with vegetables excluding carrots, broccoli, and dark-green leafy; no potatoes, mushroom sauce             | 8000_Mixed | 54 | 51 | 3  | 2 | 3.5 | B |
| 58101940 | Taco or tostada salad, meatless                                                                                 | 8000_Mixed | 54 | 51 | 3  | 3 | 4   | B |
| 27315210 | Beef, rice, and vegetables including carrots, broccoli, and/or dark-green leafy; tomato-based sauce             | 8000_Mixed | 54 | 50 | 4  | 1 | 3.5 | C |
| 27510190 | Cheeseburger, from school cafeteria                                                                             | 8000_Mixed | 54 | 50 | 4  | 3 | 4   | D |
| 58100535 | Enchilada with meat, green-chile or enchilada sauce                                                             | 8000_Mixed | 54 | 50 | 4  | 2 | 4   | B |
| 58161120 | Brown rice casserole with cheese                                                                                | 8000_Mixed | 54 | 50 | 4  | 2 | 3   | D |
| 75440510 | Vegetable combinations, excluding carrots, broccoli, and dark-green leafy; cooked, with cheese sauce            | 8000_Mixed | 54 | 50 | 4  | 2 | 3.5 | C |
| 77141010 | Potato chicken pie, Puerto Rican style                                                                          | 8000_Mixed | 54 | 50 | 4  | 2 | 2   | D |
| 27350200 | Oyster pie                                                                                                      | 8000_Mixed | 54 | 49 | 5  | 2 | 2.5 | C |
| 58134810 | Cannelloni, cheese- and spinach-filled, no sauce                                                                | 8000_Mixed | 54 | 49 | 5  | 2 | 3   | C |
| 73502000 | Squash, winter type, soup, home recipe, canned, or ready-to-serve                                               | 8000_Mixed | 54 | 49 | 5  | 2 | 3   | C |
| 27311635 | Beef, potatoes, and vegetables including carrots, broccoli, and/or dark-green leafy; cheese sauce               | 8000_Mixed | 54 | 48 | 6  | 2 | 4   | B |
| 27360120 | Chow mein or chop suey, various types of meat, with noodles                                                     | 8000_Mixed | 54 | 48 | 6  | 1 | 4   | A |



|          |                                                                                                                                                                                          |            |    |    |    |   |     |   |
|----------|------------------------------------------------------------------------------------------------------------------------------------------------------------------------------------------|------------|----|----|----|---|-----|---|
| 27430590 | Veal with vegetables excluding carrots, broccoli, and dark-green leafy; and potatoes, cream or white sauce                                                                               | 8000_Mixed | 54 | 48 | 6  | 1 | 3.5 | B |
| 27550420 | Fish sandwich, grilled                                                                                                                                                                   | 8000_Mixed | 54 | 48 | 6  | 3 | 4   | B |
| 58130014 | Lasagna with meat, from restaurant                                                                                                                                                       | 8000_Mixed | 54 | 48 | 6  | 1 | 3   | D |
| 58137210 | Pad Thai, NFS                                                                                                                                                                            | 8000_Mixed | 54 | 48 | 6  | 1 | 3.5 | C |
| 58137230 | Pad Thai with chicken                                                                                                                                                                    | 8000_Mixed | 54 | 48 | 6  | 1 | 3.5 | C |
| 58156610 | Pigeon pea asopao, Asopao de gandules                                                                                                                                                    | 8000_Mixed | 54 | 48 | 6  | 1 | 3.5 | C |
| 75417013 | Peas, from canned, creamed                                                                                                                                                               | 8000_Mixed | 54 | 48 | 6  | 2 | 3.5 | C |
| 27250900 | Fish and noodles with mushroom sauce                                                                                                                                                     | 8000_Mixed | 54 | 47 | 7  | 2 | 3.5 | B |
| 27320027 | Ham or pork, noodles, and vegetables including carrots, broccoli, and/or dark-green leafy; no sauce                                                                                      | 8000_Mixed | 54 | 47 | 7  | 1 | 3.5 | B |
| 58404030 | Chicken or turkey rice soup, home recipe                                                                                                                                                 | 8000_Mixed | 54 | 47 | 7  | 1 | 3.5 | B |
| 71802010 | Macaroni and potato soup                                                                                                                                                                 | 8000_Mixed | 54 | 47 | 7  | 1 | 3.5 | B |
| 27243100 | Biryani with chicken                                                                                                                                                                     | 8000_Mixed | 54 | 46 | 8  | 1 | 4   | A |
| 27145000 | Chicken or turkey with teriyaki                                                                                                                                                          | 8000_Mixed | 54 | 45 | 9  | 1 | 3.5 | D |
| 27250610 | Tuna noodle casserole with cream or white sauce                                                                                                                                          | 8000_Mixed | 54 | 45 | 9  | 2 | 3.5 | C |
| 27446260 | Chicken or turkey salad, made with any type of fat free dressing                                                                                                                         | 8000_Mixed | 54 | 45 | 9  | 2 | 3.5 | C |
| 27250130 | Shrimp and noodles with cheese sauce                                                                                                                                                     | 8000_Mixed | 54 | 44 | 10 | 2 | 3.5 | B |
| 27250126 | Shrimp and noodles with cream or white sauce                                                                                                                                             | 8000_Mixed | 54 | 43 | 11 | 1 | 3.5 | B |
| 27116400 | Steak tartare                                                                                                                                                                            | 8000_Mixed | 54 | 42 | 12 | 1 | 3.5 | B |
| 75649030 | Vegetable soup, canned, low sodium, prepared with water or ready-to-serve                                                                                                                | 8000_Mixed | 53 | 58 | -5 | 4 | 3.5 | B |
| 42302060 | Peanut butter and jelly sandwich, with reduced fat peanut butter, regular jelly, on wheat bread                                                                                          | 8000_Mixed | 53 | 56 | -3 | 3 | 2.5 | D |
| 42302065 | Peanut butter and jelly sandwich, with reduced fat peanut butter, regular jelly, on whole wheat bread                                                                                    | 8000_Mixed | 53 | 56 | -3 | 3 | 2.5 | D |
| 27550750 | Tuna salad submarine sandwich, with lettuce and tomato                                                                                                                                   | 8000_Mixed | 53 | 55 | -2 | 4 | 3.5 | C |
| 27550751 | Tuna salad submarine sandwich, with cheese, lettuce and tomato                                                                                                                           | 8000_Mixed | 53 | 55 | -2 | 4 | 3.5 | C |
| 27446320 | Chicken or turkey, breaded, fried, garden salad with bacon and cheese, chicken and/or turkey, bacon, cheese, lettuce and/or greens, tomato and/or carrots, other vegetables, no dressing | 8000_Mixed | 53 | 53 | 0  | 3 | 4   | A |
| 27550800 | Seafood salad sandwich                                                                                                                                                                   | 8000_Mixed | 53 | 53 | 0  | 4 | 3.5 | C |
| 58148116 | Macaroni or pasta salad, made with creamy dressing                                                                                                                                       | 8000_Mixed | 53 | 53 | 0  | 2 | 3.5 | C |
| 24209001 | Turkey with barbecue sauce, skin not eaten                                                                                                                                               | 8000_Mixed | 53 | 49 | 4  | 2 | 3.5 | B |
| 27243500 | Chicken or turkey and rice with tomato-based sauce                                                                                                                                       | 8000_Mixed | 53 | 49 | 4  | 1 | 3.5 | C |
| 27320450 | Ham, potatoes, and vegetables including carrots, broccoli, and/or dark-green leafy; no sauce                                                                                             | 8000_Mixed | 53 | 49 | 4  | 2 | 3.5 | C |
| 58146342 | Pasta with tomato-based sauce and poultry, home recipe                                                                                                                                   | 8000_Mixed | 53 | 49 | 4  | 1 | 3.5 | B |
| 58146702 | Pasta, whole grain, with cream sauce and meat, home recipe                                                                                                                               | 8000_Mixed | 53 | 49 | 4  | 2 | 3.5 | C |
| 71801100 | Potato and cheese soup                                                                                                                                                                   | 8000_Mixed | 53 | 49 | 4  | 2 | 3.5 | B |
| 27250050 | Fish cake or patty, NS as to fish                                                                                                                                                        | 8000_Mixed | 53 | 48 | 5  | 3 | 3.5 | C |
| 27250310 | Haddock cake or patty                                                                                                                                                                    | 8000_Mixed | 53 | 48 | 5  | 3 | 3.5 | C |
| 27320350 | Pork, rice, and vegetables excluding carrots, broccoli, and dark-green leafy; tomato-based sauce                                                                                         | 8000_Mixed | 53 | 48 | 5  | 1 | 3.5 | C |

|          |                                                                                                                                              |            |    |    |    |   |     |   |
|----------|----------------------------------------------------------------------------------------------------------------------------------------------|------------|----|----|----|---|-----|---|
| 27343410 | Chicken or turkey, noodles, and vegetables including carrots, broccoli, and/or dark-green leafy; gravy                                       | 8000_Mixed | 53 | 48 | 5  | 2 | 3.5 | C |
| 27343470 | Chicken or turkey, noodles, and vegetables including carrots, broccoli, and/or dark-green leafy; cream sauce, white sauce, or mushroom sauce | 8000_Mixed | 53 | 48 | 5  | 2 | 3.5 | C |
| 27550410 | Fish sandwich, fried, on wheat bun                                                                                                           | 8000_Mixed | 53 | 48 | 5  | 3 | 4   | B |
| 58104190 | Nachos with chicken, cheese, and sour cream                                                                                                  | 8000_Mixed | 53 | 48 | 5  | 3 | 3.5 | C |
| 27118180 | Beef stew, meat with gravy, no potatoes, Puerto Rican style                                                                                  | 8000_Mixed | 53 | 47 | 6  | 1 | 3.5 | D |
| 27320310 | Pork chow mein or chop suey with noodles                                                                                                     | 8000_Mixed | 53 | 47 | 6  | 1 | 4   | B |
| 58100600 | Enchilada with chicken, tomato-based sauce                                                                                                   | 8000_Mixed | 53 | 47 | 6  | 3 | 4   | A |
| 75414013 | Mushrooms, from canned, creamed                                                                                                              | 8000_Mixed | 53 | 47 | 6  | 1 | 3.5 | C |
| 75418101 | Turnips, from fresh, creamed                                                                                                                 | 8000_Mixed | 53 | 47 | 6  | 1 | 3.5 | C |
| 73501010 | Carrot with rice soup, cream of, prepared with milk, home recipe, canned or ready-to-serve                                                   | 8000_Mixed | 53 | 46 | 7  | 1 | 3.5 | B |
| 75460710 | Vegetable combinations, excluding carrots, broccoli, and dark-green leafy; cooked, with pasta                                                | 8000_Mixed | 53 | 46 | 7  | 1 | 4   | A |
| 27350090 | Fish, noodles, and vegetables including carrots, broccoli, and/or dark green leafy; cheese sauce                                             | 8000_Mixed | 53 | 45 | 8  | 2 | 3.5 | C |
| 28315150 | Meat and corn hominy soup, home recipe, Mexican style                                                                                        | 8000_Mixed | 53 | 45 | 8  | 1 | 3.5 | B |
| 58163130 | Dirty rice                                                                                                                                   | 8000_Mixed | 53 | 45 | 8  | 1 | 3.5 | B |
| 27211550 | Stewed, seasoned, ground beef with potatoes, Mexican style                                                                                   | 8000_Mixed | 53 | 44 | 9  | 1 | 4   | B |
| 28340220 | Chicken soup with noodles and potatoes, Puerto Rican style                                                                                   | 8000_Mixed | 53 | 44 | 9  | 1 | 3.5 | B |
| 58120110 | Crepe, filled with meat, poultry, or seafood, with sauce                                                                                     | 8000_Mixed | 53 | 44 | 9  | 2 | 3.5 | C |
| 75411010 | Corn, scalloped or pudding                                                                                                                   | 8000_Mixed | 53 | 44 | 9  | 2 | 3.5 | C |
| 27120100 | Ham or pork with tomato-based sauce                                                                                                          | 8000_Mixed | 53 | 43 | 10 | 1 | 4   | A |
| 27261500 | Stewed, seasoned, ground beef and pork with potatoes, Mexican style                                                                          | 8000_Mixed | 53 | 43 | 10 | 1 | 4   | A |
| 28340210 | Chicken rice soup, Puerto Rican style                                                                                                        | 8000_Mixed | 53 | 43 | 10 | 1 | 3.5 | B |
| 58100900 | Enchilada with seafood, tomato-based sauce                                                                                                   | 8000_Mixed | 53 | 43 | 10 | 4 | 4   | B |
| 58131610 | Ravioli, cheese and spinach filled, with tomato sauce                                                                                        | 8000_Mixed | 53 | 43 | 10 | 2 | 3.5 | C |
| 27136050 | Venison or deer with tomato-based sauce                                                                                                      | 8000_Mixed | 53 | 42 | 11 | 1 | 4   | A |
| 75140500 | Broccoli salad with cauliflower, cheese, bacon bits, and dressing                                                                            | 8000_Mixed | 52 | 60 | -8 | 3 | 3   | D |
| 42303010 | Peanut butter and banana sandwich                                                                                                            | 8000_Mixed | 52 | 51 | 1  | 3 | 3.5 | C |
| 27146110 | Sweet and sour chicken or turkey, without vegetables                                                                                         | 8000_Mixed | 52 | 48 | 4  | 1 | 3.5 | C |
| 27146155 | Chicken curry with rice                                                                                                                      | 8000_Mixed | 52 | 48 | 4  | 1 | 3.5 | C |
| 58101935 | Taco or tostada salad with chicken                                                                                                           | 8000_Mixed | 52 | 48 | 4  | 3 | 3.5 | C |
| 58132310 | Spaghetti with tomato sauce and meatballs or spaghetti with meat sauce or spaghetti with meat sauce and meatballs                            | 8000_Mixed | 52 | 48 | 4  | 2 | 3.5 | C |
| 58146302 | Pasta with tomato-based sauce, and added vegetables, home recipe                                                                             | 8000_Mixed | 52 | 48 | 4  | 1 | 3.5 | B |
| 58160550 | Rice, white, with dark green vegetables, NS as to fat                                                                                        | 8000_Mixed | 52 | 48 | 4  | 1 | 3.5 | B |
| 27315220 | Beef, rice, and vegetables excluding carrots, broccoli, and/or dark-green leafy; tomato-based sauce                                          | 8000_Mixed | 52 | 47 | 5  | 1 | 3.5 | B |
| 27345010 | Chicken or turkey, rice, and vegetables including carrots, broccoli, and/or dark-green leafy; no sauce                                       | 8000_Mixed | 52 | 47 | 5  | 1 | 3.5 | C |

|          |                                                                                                               |            |    |    |    |   |     |   |
|----------|---------------------------------------------------------------------------------------------------------------|------------|----|----|----|---|-----|---|
| 27445150 | General Tso chicken                                                                                           | 8000_Mixed | 52 | 47 | 5  | 1 | 3   | D |
| 27510643 | Hamburger, 1 medium patty, with condiments, on whole wheat bun                                                | 8000_Mixed | 52 | 47 | 5  | 2 | 3.5 | C |
| 58104130 | Nachos with meat and cheese                                                                                   | 8000_Mixed | 52 | 47 | 5  | 2 | 3.5 | C |
| 27220520 | Ham or pork and potatoes with cheese sauce                                                                    | 8000_Mixed | 52 | 46 | 6  | 2 | 3.5 | B |
| 27446410 | Chicken or turkey and vegetables excluding carrots, broccoli, and dark-green leafy; no potatoes, cheese sauce | 8000_Mixed | 52 | 46 | 6  | 2 | 3.5 | C |
| 58104250 | Nachos with chicken or turkey and cheese                                                                      | 8000_Mixed | 52 | 46 | 6  | 3 | 3.5 | D |
| 58134710 | Tortellini, spinach-filled, with tomato sauce                                                                 | 8000_Mixed | 52 | 46 | 6  | 2 | 3   | C |
| 75414010 | Mushrooms, NS as to form, creamed                                                                             | 8000_Mixed | 52 | 46 | 6  | 1 | 3.5 | C |
| 27311640 | Beef, potatoes, and vegetables excluding carrots, broccoli, and dark-green leafy; cheese sauce                | 8000_Mixed | 52 | 45 | 7  | 2 | 4   | B |
| 27313010 | Beef, noodles, and vegetables including carrots, broccoli, and/or dark-green leafy; no sauce                  | 8000_Mixed | 52 | 45 | 7  | 1 | 3.5 | B |
| 28331110 | Lamb, pasta, and vegetable soup, Puerto Rican style                                                           | 8000_Mixed | 52 | 45 | 7  | 1 | 3   | C |
| 27320025 | Ham or pork, noodles and vegetables excluding carrots, broccoli, and dark-green leafy; no sauce               | 8000_Mixed | 52 | 44 | 8  | 1 | 3.5 | B |
| 27420010 | Cabbage with ham hocks                                                                                        | 8000_Mixed | 52 | 44 | 8  | 3 | 4.5 | A |
| 27461010 | Stewed seasoned ground beef, Puerto Rican style (Picadillo para relleno)                                      | 8000_Mixed | 52 | 44 | 8  | 1 | 3.5 | D |
| 58131600 | Ravioli, cheese and spinach-filled, with cream sauce                                                          | 8000_Mixed | 52 | 44 | 8  | 2 | 3   | C |
| 58160160 | Hopping John                                                                                                  | 8000_Mixed | 52 | 44 | 8  | 1 | 4   | B |
| 27146200 | Chicken or turkey with cheese sauce                                                                           | 8000_Mixed | 52 | 43 | 9  | 2 | 3.5 | D |
| 27350100 | Fish, noodles, and vegetables excluding carrots, broccoli, and dark-green leafy; cheese sauce                 | 8000_Mixed | 52 | 43 | 9  | 2 | 3.5 | C |
| 27421010 | Stuffed christophine, Puerto Rican style                                                                      | 8000_Mixed | 52 | 43 | 9  | 1 | 4   | C |
| 27221110 | Stuffed pork roast, Puerto Rican style                                                                        | 8000_Mixed | 52 | 42 | 10 | 1 | 4   | A |
| 27146160 | Chicken with mole sauce                                                                                       | 8000_Mixed | 52 | 41 | 11 | 1 | 3.5 | B |
| 27148010 | Stuffed chicken, drumstick or breast, Puerto Rican style                                                      | 8000_Mixed | 52 | 41 | 11 | 2 | 2   | D |
| 58157310 | Congee, with meat, poultry, and/or seafood, and vegetables                                                    | 8000_Mixed | 52 | 41 | 11 | 1 | 3.5 | B |
| 14640046 | Cheese sandwich, reduced fat Cheddar cheese, on wheat bread, with mayonnaise                                  | 8000_Mixed | 51 | 58 | -7 | 4 | 2   | D |
| 27564570 | Frankfurter or hot dog sandwich, meatless, on bread, with meatless chili                                      | 8000_Mixed | 51 | 57 | -6 | 4 | 4   | B |
| 58401200 | Barley soup, sweet, with or without nuts, Asian Style                                                         | 8000_Mixed | 51 | 56 | -5 | 2 | 3.5 | B |
| 75651090 | Vegetable chicken soup, canned, low sodium, prepared with water                                               | 8000_Mixed | 51 | 56 | -5 | 4 | 4   | A |
| 75649070 | Vegetable soup, made from dry mix, low sodium                                                                 | 8000_Mixed | 51 | 55 | -4 | 4 | 3.5 | B |
| 14620300 | Topping from cheese pizza                                                                                     | 8000_Mixed | 51 | 51 | 0  | 3 | 1.5 | E |
| 58148170 | Macaroni or pasta salad with chicken                                                                          | 8000_Mixed | 51 | 51 | 0  | 2 | 3.5 | B |
| 27510206 | Cheeseburger, 1 small patty, with condiments, on wheat bun                                                    | 8000_Mixed | 51 | 49 | 2  | 3 | 3.5 | D |
| 27510207 | Cheeseburger, 1 small patty, with condiments, on whole wheat bun                                              | 8000_Mixed | 51 | 49 | 2  | 3 | 3.5 | D |
| 27510565 | Hamburger, from school cafeteria                                                                              | 8000_Mixed | 51 | 49 | 2  | 3 | 4   | B |
| 27510252 | Cheeseburger, 1 medium patty, with condiments, on wheat bun                                                   | 8000_Mixed | 51 | 48 | 3  | 3 | 3.5 | D |
| 27510253 | Cheeseburger, 1 medium patty, with condiments, on whole wheat bun                                             | 8000_Mixed | 51 | 48 | 3  | 3 | 3.5 | D |

|          |                                                                                                                                              |            |    |    |    |   |     |   |
|----------|----------------------------------------------------------------------------------------------------------------------------------------------|------------|----|----|----|---|-----|---|
| 58101955 | Taco or tostada salad, meatless with sour cream                                                                                              | 8000_Mixed | 51 | 48 | 3  | 3 | 3.5 | C |
| 58130150 | Lasagna, with chicken or turkey, and spinach                                                                                                 | 8000_Mixed | 51 | 48 | 3  | 2 | 3   | D |
| 27116110 | Beef curry with rice                                                                                                                         | 8000_Mixed | 51 | 47 | 4  | 1 | 3.5 | C |
| 27146100 | Sweet and sour chicken or turkey                                                                                                             | 8000_Mixed | 51 | 47 | 4  | 1 | 3.5 | C |
| 27510587 | Hamburger, 1 small patty, with condiments, on whole wheat bun                                                                                | 8000_Mixed | 51 | 47 | 4  | 2 | 3.5 | C |
| 58146682 | Pasta, whole grain, with cream sauce, home recipe                                                                                            | 8000_Mixed | 51 | 47 | 4  | 2 | 3   | C |
| 58160570 | Rice, white, with dark green vegetables, fat added                                                                                           | 8000_Mixed | 51 | 47 | 4  | 1 | 3.5 | B |
| 27250710 | Tuna and rice with mushroom sauce                                                                                                            | 8000_Mixed | 51 | 46 | 5  | 2 | 3.5 | C |
| 27343480 | Chicken or turkey, noodles, and vegetables excluding carrots, broccoli, and/or dark-green leafy; cream sauce, white sauce, or mushroom sauce | 8000_Mixed | 51 | 46 | 5  | 2 | 3.5 | C |
| 27510642 | Hamburger, 1 medium patty, with condiments, on wheat bun                                                                                     | 8000_Mixed | 51 | 46 | 5  | 2 | 3.5 | C |
| 58137250 | Pad Thai with meat                                                                                                                           | 8000_Mixed | 51 | 46 | 5  | 1 | 3.5 | C |
| 72202010 | Broccoli casserole with noodles                                                                                                              | 8000_Mixed | 51 | 46 | 5  | 2 | 4   | A |
| 27242000 | Chicken or turkey and noodles, no sauce                                                                                                      | 8000_Mixed | 51 | 45 | 6  | 1 | 3.5 | C |
| 27343420 | Chicken or turkey, noodles, and vegetables excluding carrots, broccoli, and dark-green leafy; gravy                                          | 8000_Mixed | 51 | 45 | 6  | 2 | 3.5 | C |
| 58133140 | Manicotti, vegetable- and cheese-filled, with tomato sauce, meatless                                                                         | 8000_Mixed | 51 | 45 | 6  | 2 | 3   | C |
| 58450300 | Noodle soup, made with milk                                                                                                                  | 8000_Mixed | 51 | 45 | 6  | 1 | 3.5 | C |
| 27135050 | Veal Marsala                                                                                                                                 | 8000_Mixed | 51 | 44 | 7  | 1 | 4   | A |
| 58160210 | Rice with vegetables, no sauce                                                                                                               | 8000_Mixed | 51 | 44 | 7  | 1 | 3.5 | B |
| 27313020 | Beef, noodles, and vegetables excluding carrots, broccoli, and dark-green leafy; no sauce                                                    | 8000_Mixed | 51 | 43 | 8  | 1 | 3.5 | B |
| 28315160 | Italian Wedding Soup                                                                                                                         | 8000_Mixed | 51 | 43 | 8  | 2 | 3.5 | C |
| 58149110 | Noodle pudding                                                                                                                               | 8000_Mixed | 51 | 43 | 8  | 2 | 3.5 | C |
| 58134720 | Tortellini, spinach-filled, no sauce                                                                                                         | 8000_Mixed | 51 | 42 | 9  | 2 | 3.5 | C |
| 75656010 | Vegetable soup, Spanish style, stew type                                                                                                     | 8000_Mixed | 51 | 42 | 9  | 2 | 4   | B |
| 77513010 | Spanish stew                                                                                                                                 | 8000_Mixed | 51 | 42 | 9  | 2 | 4   | B |
| 27143000 | Chicken or turkey with cream sauce                                                                                                           | 8000_Mixed | 51 | 41 | 10 | 1 | 3.5 | B |
| 58151160 | Sushi, with egg, no vegetables, no seafood (no fish or shellfish), rolled in seaweed                                                         | 8000_Mixed | 51 | 39 | 12 | 1 | 3.5 | C |
| 74602100 | Tomato soup, canned, low sodium, ready-to-serve                                                                                              | 8000_Mixed | 50 | 54 | -4 | 4 | 3.5 | B |
| 28340600 | Chicken or turkey vegetable soup, canned, prepared with water or ready-to-serve                                                              | 8000_Mixed | 50 | 52 | -2 | 4 | 3.5 | B |
| 58128210 | Dressing with oysters                                                                                                                        | 8000_Mixed | 50 | 50 | 0  | 4 | 3   | C |
| 58145300 | Macaroni or noodles with cheese, whole grain                                                                                                 | 8000_Mixed | 50 | 48 | 2  | 2 | 3   | D |
| 58421080 | Sopa de tortilla, Mexican style tortilla soup, home recipe                                                                                   | 8000_Mixed | 50 | 48 | 2  | 2 | 3   | C |
| 75141500 | Celery, stuffed with cheese                                                                                                                  | 8000_Mixed | 50 | 48 | 2  | 3 | 3   | C |
| 27550415 | Fish sandwich, fried, on wheat bun, with cheese                                                                                              | 8000_Mixed | 50 | 47 | 3  | 3 | 3   | D |
| 27416300 | Beef taco filling: beef, cheese, tomato, taco sauce                                                                                          | 8000_Mixed | 50 | 46 | 4  | 2 | 3   | D |
| 27510243 | Cheeseburger, 1 medium patty, plain, on whole wheat bun                                                                                      | 8000_Mixed | 50 | 46 | 4  | 2 | 2   | D |

|          |                                                                                                        |            |    |    |    |   |     |   |
|----------|--------------------------------------------------------------------------------------------------------|------------|----|----|----|---|-----|---|
| 58104090 | Nachos with cheese and sour cream                                                                      | 8000_Mixed | 50 | 46 | 4  | 3 | 3.5 | C |
| 58148117 | Macaroni or pasta salad, made with light creamy dressing                                               | 8000_Mixed | 50 | 46 | 4  | 2 | 3.5 | B |
| 58156510 | Soupy rice from Puerto Rican style Asopao de Pollo (chicken parts reported separately)                 | 8000_Mixed | 50 | 46 | 4  | 2 | 3.5 | B |
| 24209000 | Turkey with barbecue sauce, skin eaten                                                                 | 8000_Mixed | 50 | 45 | 5  | 2 | 3.5 | D |
| 27135020 | Veal scallopini                                                                                        | 8000_Mixed | 50 | 45 | 5  | 2 | 3.5 | C |
| 27510577 | Hamburger, 1 small patty, plain, on whole wheat bun                                                    | 8000_Mixed | 50 | 45 | 5  | 2 | 3.5 | D |
| 27510633 | Hamburger, 1 medium patty, plain, on whole wheat bun                                                   | 8000_Mixed | 50 | 45 | 5  | 2 | 3.5 | D |
| 58100510 | Enchilada with beef and beans                                                                          | 8000_Mixed | 50 | 45 | 5  | 3 | 4   | B |
| 58146110 | Pasta with meat sauce                                                                                  | 8000_Mixed | 50 | 45 | 5  | 1 | 3.5 | B |
| 58146332 | Pasta with tomato-based sauce, meat, and added vegetables, home recipe                                 | 8000_Mixed | 50 | 45 | 5  | 1 | 4   | B |
| 58160670 | Rice, white, with carrots, dark green vegetables, and tomatoes and/or tomato-based sauce, NS as to fat | 8000_Mixed | 50 | 45 | 5  | 1 | 3.5 | C |
| 75652030 | Vegetable beef soup, canned, prepared with milk                                                        | 8000_Mixed | 50 | 45 | 5  | 3 | 3.5 | C |
| 27211500 | Beef and potatoes with cheese sauce                                                                    | 8000_Mixed | 50 | 44 | 6  | 2 | 3.5 | B |
| 27220110 | Pork and rice with tomato-based sauce                                                                  | 8000_Mixed | 50 | 44 | 6  | 1 | 3.5 | C |
| 27231000 | Lamb or mutton and potatoes with gravy                                                                 | 8000_Mixed | 50 | 44 | 6  | 2 | 3.5 | B |
| 27313310 | Beef, noodles, and vegetables including carrots, broccoli, and/or dark-green leafy; mushroom sauce     | 8000_Mixed | 50 | 44 | 6  | 2 | 3.5 | C |
| 58100210 | Burrito with chicken and beans                                                                         | 8000_Mixed | 50 | 44 | 6  | 3 | 4   | B |
| 58156710 | Rice with stewed beans, Puerto Rican style                                                             | 8000_Mixed | 50 | 44 | 6  | 1 | 3   | C |
| 72305000 | Escarole soup                                                                                          | 8000_Mixed | 50 | 44 | 6  | 1 | 3   | C |
| 75604010 | Corn soup, cream of, prepared with milk                                                                | 8000_Mixed | 50 | 44 | 6  | 2 | 3.5 | C |
| 75411030 | Corn, cooked, NS as to form, with cream sauce, made with milk                                          | 8000_Mixed | 50 | 43 | 7  | 1 | 3.5 | C |
| 75411031 | Corn, cooked, from fresh, with cream sauce, made with milk                                             | 8000_Mixed | 50 | 43 | 7  | 1 | 3.5 | C |
| 75411032 | Corn, cooked, from frozen, with cream sauce, made with milk                                            | 8000_Mixed | 50 | 43 | 7  | 1 | 3.5 | C |
| 27250110 | Scallops and noodles with cheese sauce                                                                 | 8000_Mixed | 50 | 42 | 8  | 2 | 3.5 | C |
| 27350020 | Paella with seafood                                                                                    | 8000_Mixed | 50 | 42 | 8  | 1 | 3.5 | C |
| 28311010 | Pepperpot soup                                                                                         | 8000_Mixed | 50 | 42 | 8  | 2 | 3.5 | B |
| 28340620 | Turkey noodle soup, chunky style                                                                       | 8000_Mixed | 50 | 42 | 8  | 2 | 3.5 | B |
| 58134160 | Stuffed shells, cheese- and spinach- filled, no sauce                                                  | 8000_Mixed | 50 | 42 | 8  | 2 | 3   | C |
| 27130050 | Lamb or mutton goulash                                                                                 | 8000_Mixed | 50 | 41 | 9  | 1 | 4   | A |
| 27214110 | Meat loaf made with beef, with tomato-based sauce                                                      | 8000_Mixed | 50 | 41 | 9  | 1 | 3.5 | C |
| 27260100 | Meat loaf made with beef and pork, with tomato-based sauce                                             | 8000_Mixed | 50 | 41 | 9  | 2 | 3.5 | C |
| 28320120 | Pork vegetable soup with noodles, stew type, chunky style                                              | 8000_Mixed | 50 | 40 | 10 | 2 | 3   | C |
| 27111000 | Beef with tomato-based sauce                                                                           | 8000_Mixed | 50 | 39 | 11 | 1 | 4   | A |
| 27460490 | Julienne salad, meat, cheese, eggs, vegetables, no dressing                                            | 8000_Mixed | 50 | 39 | 11 | 2 | 3.5 | B |
| 27136080 | Venison or deer with gravy                                                                             | 8000_Mixed | 50 | 38 | 12 | 1 | 4   | A |
| 32300100 | Egg drop soup                                                                                          | 8000_Mixed | 50 | 37 | 13 | 1 | 3   | C |

|          |                                                                                                                                           |            |    |    |    |   |     |   |
|----------|-------------------------------------------------------------------------------------------------------------------------------------------|------------|----|----|----|---|-----|---|
| 75145000 | Seven-layer salad, lettuce salad made with a combination of onion, celery, green pepper, peas, mayonnaise, cheese, eggs, and/or bacon     | 8000_Mixed | 49 | 53 | -4 | 3 | 3   | C |
| 75604610 | Gazpacho, canned, undiluted                                                                                                               | 8000_Mixed | 49 | 52 | -3 | 4 | 3.5 | B |
| 74203011 | Tomatoes, from fresh, scalloped                                                                                                           | 8000_Mixed | 49 | 51 | -2 | 3 | 3.5 | C |
| 28145110 | Turkey with vegetable, stuffing, diet frozen meal                                                                                         | 8000_Mixed | 49 | 50 | -1 | 4 | 4   | A |
| 75651070 | Vegetable rice soup, canned, prepared with water or ready-to-serve                                                                        | 8000_Mixed | 49 | 50 | -1 | 4 | 3.5 | B |
| 75656040 | Vegetable soup, with pasta, chunky style                                                                                                  | 8000_Mixed | 49 | 50 | -1 | 4 | 3.5 | B |
| 58148110 | Macaroni or pasta salad, made with mayonnaise                                                                                             | 8000_Mixed | 49 | 49 | 0  | 2 | 3.5 | C |
| 58148120 | Macaroni or pasta salad with egg                                                                                                          | 8000_Mixed | 49 | 49 | 0  | 2 | 3.5 | C |
| 75418040 | Squash, summer, casserole, with cheese sauce                                                                                              | 8000_Mixed | 49 | 49 | 0  | 3 | 4   | B |
| 58100800 | Enchilada, just cheese, meatless, no beans, red-chile or enchilada sauce                                                                  | 8000_Mixed | 49 | 47 | 2  | 3 | 3.5 | C |
| 58100805 | Enchilada, just cheese, meatless, no beans, green-chile or enchilada sauce                                                                | 8000_Mixed | 49 | 47 | 2  | 3 | 3.5 | C |
| 58148114 | Macaroni or pasta salad, made with Italian dressing                                                                                       | 8000_Mixed | 49 | 47 | 2  | 2 | 3.5 | B |
| 27510343 | Bacon cheeseburger, 1 medium patty, with condiments, on whole wheat bun                                                                   | 8000_Mixed | 49 | 46 | 3  | 3 | 2   | D |
| 27540310 | Turkey sandwich, with spread                                                                                                              | 8000_Mixed | 49 | 46 | 3  | 3 | 4   | A |
| 58130140 | Lasagna with chicken or turkey                                                                                                            | 8000_Mixed | 49 | 46 | 3  | 2 | 3   | D |
| 58130320 | Lasagna, meatless, with vegetables                                                                                                        | 8000_Mixed | 49 | 46 | 3  | 2 | 3   | C |
| 58146451 | Pasta with cream sauce, seafood, and added vegetables, restaurant                                                                         | 8000_Mixed | 49 | 46 | 3  | 2 | 3   | D |
| 75400500 | Artichokes, stuffed                                                                                                                       | 8000_Mixed | 49 | 46 | 3  | 3 | 4   | C |
| 58101930 | Taco or tostada salad with meat                                                                                                           | 8000_Mixed | 49 | 45 | 4  | 3 | 3.5 | C |
| 58101950 | Taco or tostada salad with chicken and sour cream                                                                                         | 8000_Mixed | 49 | 45 | 4  | 3 | 3.5 | C |
| 58130020 | Lasagna with meat and spinach                                                                                                             | 8000_Mixed | 49 | 45 | 4  | 2 | 3   | D |
| 58148115 | Macaroni or pasta salad, made with light Italian dressing                                                                                 | 8000_Mixed | 49 | 45 | 4  | 1 | 3.5 | B |
| 75460900 | Chow mein or chop suey, meatless, with noodles                                                                                            | 8000_Mixed | 49 | 45 | 4  | 1 | 4   | B |
| 27213100 | Beef and rice with tomato-based sauce                                                                                                     | 8000_Mixed | 49 | 44 | 5  | 1 | 3.5 | C |
| 27311310 | Beef stew with potatoes and vegetables including carrots, broccoli, and/or dark-green leafy; tomato-based sauce                           | 8000_Mixed | 49 | 44 | 5  | 3 | 3.5 | B |
| 27345210 | Chicken or turkey, rice, and vegetables including carrots, broccoli, and/or dark-green leafy; gravy                                       | 8000_Mixed | 49 | 44 | 5  | 2 | 3.5 | C |
| 27345410 | Chicken or turkey, rice, and vegetables including carrots, broccoli, and/or dark-green leafy; cream sauce, white sauce, or mushroom sauce | 8000_Mixed | 49 | 44 | 5  | 2 | 3.5 | C |
| 27360000 | Stew, NFS                                                                                                                                 | 8000_Mixed | 49 | 44 | 5  | 3 | 3.5 | B |
| 58104140 | Nachos with beef and cheese                                                                                                               | 8000_Mixed | 49 | 44 | 5  | 2 | 2   | D |
| 58160460 | Rice, white, with carrots, NS as to fat                                                                                                   | 8000_Mixed | 49 | 44 | 5  | 1 | 3.5 | C |
| 58160480 | Rice, white, with carrots, fat added                                                                                                      | 8000_Mixed | 49 | 44 | 5  | 1 | 3.5 | C |
| 58160610 | Rice, white, with dark green vegetables and tomatoes and/or tomato-based sauce, NS as to fat                                              | 8000_Mixed | 49 | 44 | 5  | 1 | 3.5 | C |
| 58160630 | Rice, white, with dark green vegetables and tomatoes and/or tomato-based sauce, fat added                                                 | 8000_Mixed | 49 | 44 | 5  | 1 | 3.5 | C |

|          |                                                                                                               |            |    |    |    |   |     |   |
|----------|---------------------------------------------------------------------------------------------------------------|------------|----|----|----|---|-----|---|
| 58160640 | Rice, white, with carrots and dark green vegetables, NS as to fat                                             | 8000_Mixed | 49 | 44 | 5  | 1 | 3.5 | B |
| 58160660 | Rice, white, with carrots and dark green vegetables, fat added                                                | 8000_Mixed | 49 | 44 | 5  | 1 | 3.5 | B |
| 27313410 | Beef, noodles, and vegetables including carrots, broccoli, and/or dark-green leafy; gravy                     | 8000_Mixed | 49 | 43 | 6  | 1 | 3.5 | C |
| 27330060 | Lamb or mutton, rice, and vegetables including carrots, broccoli, and/or dark-green leafy; tomato-based sauce | 8000_Mixed | 49 | 43 | 6  | 1 | 3.5 | C |
| 27345020 | Chicken or turkey, rice, and vegetables excluding carrots, broccoli, and dark-green leafy; no sauce           | 8000_Mixed | 49 | 43 | 6  | 1 | 3.5 | C |
| 58160520 | Rice, white, with tomatoes and/or tomato-based sauce, NS as to fat                                            | 8000_Mixed | 49 | 43 | 6  | 1 | 3.5 | C |
| 58160580 | Rice, white, with carrots and tomatoes and/or tomato-based sauce, NS as to fat                                | 8000_Mixed | 49 | 43 | 6  | 1 | 3.5 | C |
| 58160600 | Rice, white, with carrots and tomatoes and/or tomato-based sauce, fat added                                   | 8000_Mixed | 49 | 43 | 6  | 1 | 3.5 | C |
| 27418410 | Beef steak with onions, Puerto Rican style                                                                    | 8000_Mixed | 49 | 42 | 7  | 2 | 1   | E |
| 28340120 | Chicken or turkey broth, without tomato, home recipe                                                          | 8000_Mixed | 49 | 42 | 7  | 1 | 3.5 | A |
| 58115110 | Tamale casserole, Puerto Rican style                                                                          | 8000_Mixed | 49 | 42 | 7  | 1 | 3.5 | C |
| 58134130 | Stuffed shells, cheese-filled, with meat sauce                                                                | 8000_Mixed | 49 | 42 | 7  | 2 | 3.5 | C |
| 27213010 | Biryani with meat                                                                                             | 8000_Mixed | 49 | 41 | 8  | 1 | 4   | B |
| 27550150 | Fried seafood sandwich                                                                                        | 8000_Mixed | 49 | 41 | 8  | 3 | 3.5 | C |
| 41601180 | Bean and ham soup, home recipe                                                                                | 8000_Mixed | 49 | 41 | 8  | 2 | 3.5 | B |
| 58155410 | Soupy rice with chicken, Puerto Rican style                                                                   | 8000_Mixed | 49 | 40 | 9  | 1 | 3.5 | C |
| 27120090 | Ham or pork with mushroom sauce                                                                               | 8000_Mixed | 49 | 39 | 10 | 1 | 4   | B |
| 58151220 | Sushi roll tuna                                                                                               | 8000_Mixed | 49 | 39 | 10 | 1 | 3.5 | B |
| 58155210 | Stuffed rice with chicken, Dominican style (Arroz relleno Dominicano)                                         | 8000_Mixed | 49 | 39 | 10 | 1 | 2   | D |
| 27162010 | Meat with tomato-based sauce                                                                                  | 8000_Mixed | 49 | 38 | 11 | 1 | 4   | A |
| 58128110 | Chicken cornbread                                                                                             | 8000_Mixed | 49 | 38 | 11 | 2 | 3.5 | C |
| 58151450 | Sushi, topped with egg                                                                                        | 8000_Mixed | 49 | 36 | 13 | 1 | 3.5 | C |
| 14640036 | Cheese sandwich, Cheddar cheese, on whole wheat bread, with mayonnaise                                        | 8000_Mixed | 48 | 54 | -6 | 4 | 1.5 | D |
| 75141005 | Cabbage salad or coleslaw, made with light coleslaw dressing                                                  | 8000_Mixed | 48 | 54 | -6 | 3 | 3.5 | C |
| 27550740 | Tuna salad sandwich, on bun                                                                                   | 8000_Mixed | 48 | 51 | -3 | 4 | 3.5 | C |
| 41602070 | Split pea soup, canned, reduced sodium, prepared with water or ready-to-serve                                 | 8000_Mixed | 48 | 50 | -2 | 4 | 4   | A |
| 14640024 | Cheese sandwich, reduced fat Cheddar cheese, on whole wheat bread, no spread                                  | 8000_Mixed | 48 | 49 | -1 | 4 | 2.5 | D |
| 28143150 | Chicken and vegetable entree with noodles, diet frozen meal                                                   | 8000_Mixed | 48 | 49 | -1 | 4 | 4   | A |
| 28141610 | Chicken and vegetables in cream or white sauce, diet frozen meal                                              | 8000_Mixed | 48 | 48 | 0  | 4 | 4   | A |
| 75603010 | Celery soup, cream of, prepared with milk, home recipe, canned or ready-to-serve                              | 8000_Mixed | 48 | 45 | 3  | 3 | 3   | C |
| 58128120 | Cornmeal dressing with chicken or turkey and vegetables                                                       | 8000_Mixed | 48 | 44 | 4  | 2 | 3   | D |
| 58145111 | Macaroni or noodles with cheese, from restaurant                                                              | 8000_Mixed | 48 | 44 | 4  | 1 | 3   | C |
| 58421010 | Sopa Seca de Fideo, Mexican style, made with dry noodles, home recipe                                         | 8000_Mixed | 48 | 44 | 4  | 2 | 3   | C |
| 72202020 | Broccoli casserole with rice                                                                                  | 8000_Mixed | 48 | 44 | 4  | 2 | 3.5 | B |

|          |                                                                                                                                                  |            |    |    |     |   |     |   |
|----------|--------------------------------------------------------------------------------------------------------------------------------------------------|------------|----|----|-----|---|-----|---|
| 27120060 | Sweet and sour pork                                                                                                                              | 8000_Mixed | 48 | 43 | 5   | 2 | 3.5 | C |
| 27347240 | Chicken or turkey, dumplings, and vegetables including carrots, broccoli, and/or dark green leafy; gravy                                         | 8000_Mixed | 48 | 43 | 5   | 2 | 3.5 | C |
| 58104310 | Chalupa with beans, chicken, cheese, lettuce and tomato                                                                                          | 8000_Mixed | 48 | 43 | 5   | 3 | 3.5 | C |
| 58130015 | Lasagna with meat, home recipe                                                                                                                   | 8000_Mixed | 48 | 43 | 5   | 2 | 3   | D |
| 58160540 | Rice, white, with tomatoes and/or tomato-based sauce, fat added                                                                                  | 8000_Mixed | 48 | 43 | 5   | 1 | 3.5 | C |
| 77230210 | Cassava Pasteles, Puerto Rican style                                                                                                             | 8000_Mixed | 48 | 43 | 5   | 2 | 2.5 | D |
| 27250830 | Fish and rice with mushroom sauce                                                                                                                | 8000_Mixed | 48 | 42 | 6   | 2 | 3.5 | B |
| 27443110 | Chicken or turkey a la king with vegetables including carrots, broccoli, and/or dark-green leafy; no potatoes, cream, white, or soup-based sauce | 8000_Mixed | 48 | 42 | 6   | 2 | 3   | D |
| 58100400 | Enchilada with beef, no beans                                                                                                                    | 8000_Mixed | 48 | 42 | 6   | 3 | 4   | B |
| 58146210 | Pasta with sauce, NFS                                                                                                                            | 8000_Mixed | 48 | 42 | 6   | 1 | 3.5 | B |
| 58146322 | Pasta with tomato-based sauce and meat, home recipe                                                                                              | 8000_Mixed | 48 | 42 | 6   | 1 | 3.5 | B |
| 58160220 | Rice with vegetables, tomato-based sauce (mixture)                                                                                               | 8000_Mixed | 48 | 42 | 6   | 1 | 3.5 | C |
| 58160690 | Rice, white, with carrots, dark green vegetables, and tomatoes and/or tomato-based sauce, fat added                                              | 8000_Mixed | 48 | 42 | 6   | 1 | 3.5 | C |
| 27242200 | Chicken or turkey and noodles with gravy                                                                                                         | 8000_Mixed | 48 | 41 | 7   | 2 | 3.5 | C |
| 27313320 | Beef, noodles, and vegetables excluding carrots, broccoli, and dark-green leafy; mushroom sauce                                                  | 8000_Mixed | 48 | 41 | 7   | 2 | 3.5 | C |
| 27313420 | Beef, noodles, and vegetables excluding carrots, broccoli, and dark-green leafy; gravy                                                           | 8000_Mixed | 48 | 41 | 7   | 1 | 3.5 | C |
| 27343950 | Chicken or turkey, noodles, and vegetables including carrots, broccoli, and/or dark-green leafy; cheese sauce                                    | 8000_Mixed | 48 | 41 | 7   | 2 | 3.5 | C |
| 27540330 | Turkey sandwich, with gravy                                                                                                                      | 8000_Mixed | 48 | 41 | 7   | 3 | 4   | A |
| 41601060 | Bean soup, with macaroni and meat                                                                                                                | 8000_Mixed | 48 | 41 | 7   | 2 | 3.5 | C |
| 58136150 | Lo mein, with beef                                                                                                                               | 8000_Mixed | 48 | 41 | 7   | 1 | 4   | B |
| 71851010 | Plantain soup, Puerto Rican style                                                                                                                | 8000_Mixed | 48 | 41 | 7   | 2 | 3   | C |
| 58136160 | Lo mein, with chicken                                                                                                                            | 8000_Mixed | 48 | 40 | 8   | 1 | 3.5 | C |
| 58146120 | Pasta with tomato-based sauce, cheese and meat                                                                                                   | 8000_Mixed | 48 | 40 | 8   | 2 | 3.5 | C |
| 27360010 | Goulash, NFS                                                                                                                                     | 8000_Mixed | 48 | 39 | 9   | 1 | 3.5 | B |
| 27120020 | Ham or pork with gravy                                                                                                                           | 8000_Mixed | 48 | 38 | 10  | 1 | 4   | A |
| 58131590 | Ravioli, cheese and spinach-filled, no sauce                                                                                                     | 8000_Mixed | 48 | 38 | 10  | 1 | 3.5 | C |
| 58155510 | Soupy rice mixture with chicken and potatoes, Puerto Rican style                                                                                 | 8000_Mixed | 48 | 38 | 10  | 1 | 3.5 | B |
| 28320110 | Pork and rice soup, stew type, chunky style                                                                                                      | 8000_Mixed | 48 | 37 | 11  | 1 | 3.5 | B |
| 58131320 | Ravioli, meat-filled, with tomato sauce or meat sauce                                                                                            | 8000_Mixed | 48 | 37 | 11  | 1 | 3   | C |
| 27162500 | Stewed, seasoned, ground beef and pork, Mexican style                                                                                            | 8000_Mixed | 48 | 36 | 12  | 1 | 4   | B |
| 27150130 | Seafood newburg                                                                                                                                  | 8000_Mixed | 48 | 34 | 14  | 2 | 1.5 | D |
| 14640040 | Cheese sandwich, reduced fat American cheese,, on wheat bread, with mayonnaise                                                                   | 8000_Mixed | 47 | 57 | -10 | 4 | 2   | D |
| 27540230 | Chicken patty sandwich with cheese, on wheat bun, with lettuce, tomato and spread                                                                | 8000_Mixed | 47 | 54 | -7  | 4 | 2.5 | D |
| 27550720 | Tuna salad sandwich, on bread                                                                                                                    | 8000_Mixed | 47 | 51 | -4  | 4 | 3.5 | C |
| 27550745 | Tuna salad sandwich, on bun, with cheese                                                                                                         | 8000_Mixed | 47 | 50 | -3  | 4 | 3   | D |



|          |                                                                                                                   |            |    |    |    |   |     |   |
|----------|-------------------------------------------------------------------------------------------------------------------|------------|----|----|----|---|-----|---|
| 75649010 | Vegetable soup, canned, prepared with water or ready-to-serve                                                     | 8000_Mixed | 47 | 50 | -3 | 4 | 3.5 | B |
| 75656020 | Vegetable soup, chunky style                                                                                      | 8000_Mixed | 47 | 50 | -3 | 4 | 3.5 | B |
| 28355130 | Clam chowder, New England, prepared with water                                                                    | 8000_Mixed | 47 | 48 | -1 | 4 | 3.5 | C |
| 28143180 | Chicken in butter sauce with potatoes and vegetable, diet frozen meal                                             | 8000_Mixed | 47 | 47 | 0  | 4 | 4.5 | A |
| 58148180 | Macaroni or pasta salad with cheese                                                                               | 8000_Mixed | 47 | 47 | 0  | 3 | 3   | C |
| 73305010 | Squash, winter, baked with cheese                                                                                 | 8000_Mixed | 47 | 46 | 1  | 3 | 3.5 | C |
| 58105075 | Fajita with vegetables                                                                                            | 8000_Mixed | 47 | 45 | 2  | 3 | 3   | C |
| 27146360 | Sesame chicken                                                                                                    | 8000_Mixed | 47 | 44 | 3  | 1 | 2   | D |
| 27420250 | Ham and vegetables including carrots broccoli, and/or dark-green leafy; no potatoes, no sauce                     | 8000_Mixed | 47 | 44 | 3  | 2 | 3   | D |
| 27510342 | Bacon cheeseburger, 1 medium patty, with condiments, on wheat bun                                                 | 8000_Mixed | 47 | 44 | 3  | 3 | 2   | D |
| 75611010 | Vegetable soup, cream of, prepared with milk                                                                      | 8000_Mixed | 47 | 44 | 3  | 2 | 3   | C |
| 27211190 | Beef and potatoes with cream sauce, white sauce or mushroom sauce                                                 | 8000_Mixed | 47 | 42 | 5  | 2 | 3.5 | C |
| 27540195 | Chicken fillet sandwich, grilled, on white bun                                                                    | 8000_Mixed | 47 | 42 | 5  | 3 | 4   | A |
| 27242250 | Chicken or turkey and noodles with mushroom sauce                                                                 | 8000_Mixed | 47 | 41 | 6  | 2 | 3.5 | C |
| 27311210 | Corned beef, potatoes, and vegetables including carrots, broccoli, and/or dark-green leafy; no sauce              | 8000_Mixed | 47 | 41 | 6  | 2 | 4   | A |
| 27320410 | Ham, potatoes, and vegetables excluding carrots, broccoli, and dark-green leafy; no sauce                         | 8000_Mixed | 47 | 41 | 6  | 2 | 4   | A |
| 27345220 | Chicken or turkey, rice, and vegetables excluding carrots, broccoli, and dark-green leafy; gravy                  | 8000_Mixed | 47 | 41 | 6  | 2 | 3.5 | C |
| 58160490 | Rice, white, with peas and carrots, NS as to fat                                                                  | 8000_Mixed | 47 | 41 | 6  | 1 | 3.5 | B |
| 58160510 | Rice, white, with peas and carrots, fat added                                                                     | 8000_Mixed | 47 | 41 | 6  | 1 | 3.5 | B |
| 74604500 | Tomato noodle soup, canned, prepared with water or ready-to-serve                                                 | 8000_Mixed | 47 | 41 | 6  | 2 | 3.5 | B |
| 75460800 | Vegetable combinations, including carrots, broccoli, and/or dark-green leafy; cooked, with butter sauce and pasta | 8000_Mixed | 47 | 41 | 6  | 1 | 3   | C |
| 27315010 | Beef, rice, and vegetables including carrots, broccoli, and/or dark-green leafy; no sauce                         | 8000_Mixed | 47 | 40 | 7  | 1 | 3.5 | B |
| 27343960 | Chicken or turkey, noodles, and vegetables excluding carrots, broccoli, and dark-green leafy; cheese sauce        | 8000_Mixed | 47 | 40 | 7  | 2 | 3.5 | C |
| 58160430 | Rice, white, with peas, NS as to fat                                                                              | 8000_Mixed | 47 | 40 | 7  | 1 | 3.5 | B |
| 58160450 | Rice, white, with peas, fat added                                                                                 | 8000_Mixed | 47 | 40 | 7  | 1 | 3.5 | B |
| 27246200 | Chicken or turkey with stuffing                                                                                   | 8000_Mixed | 47 | 39 | 8  | 2 | 4   | B |
| 27320030 | Ham or pork, noodles and vegetables excluding carrots, broccoli, and dark-green leafy; cheese sauce               | 8000_Mixed | 47 | 39 | 8  | 2 | 3.5 | C |
| 27161010 | Meat loaf, Puerto Rican style                                                                                     | 8000_Mixed | 47 | 38 | 9  | 1 | 1.5 | D |
| 27214100 | Meat loaf made with beef                                                                                          | 8000_Mixed | 47 | 37 | 10 | 1 | 3.5 | C |
| 27246100 | Chicken or turkey with dumplings                                                                                  | 8000_Mixed | 47 | 37 | 10 | 1 | 3.5 | B |
| 27260080 | Meat loaf made with beef and pork                                                                                 | 8000_Mixed | 47 | 37 | 10 | 1 | 3.5 | C |
| 27260090 | Meat loaf made with beef, veal and pork                                                                           | 8000_Mixed | 47 | 37 | 10 | 1 | 3.5 | C |
| 28315110 | Beef noodle soup, chunky style                                                                                    | 8000_Mixed | 47 | 37 | 10 | 1 | 3.5 | B |
| 28360210 | Spanish vegetable soup, Puerto Rican style                                                                        | 8000_Mixed | 47 | 37 | 10 | 2 | 3.5 | C |

|          |                                                                                                                                        |            |    |    |    |   |     |   |
|----------|----------------------------------------------------------------------------------------------------------------------------------------|------------|----|----|----|---|-----|---|
| 32301100 | Garlic egg soup, Puerto Rican style                                                                                                    | 8000_Mixed | 47 | 37 | 10 | 2 | 3   | C |
| 58100350 | Burrito with eggs and cheese, no beans                                                                                                 | 8000_Mixed | 47 | 37 | 10 | 3 | 3   | D |
| 58137300 | Adobo, with noodles                                                                                                                    | 8000_Mixed | 47 | 36 | 11 | 1 | 3.5 | C |
| 58150530 | Adobo, with rice                                                                                                                       | 8000_Mixed | 47 | 36 | 11 | 1 | 3.5 | C |
| 75418060 | Squash, summer, souffle                                                                                                                | 8000_Mixed | 47 | 36 | 11 | 1 | 3   | C |
| 58151210 | Sushi roll, shrimp                                                                                                                     | 8000_Mixed | 47 | 30 | 17 | 1 | 3.5 | C |
| 74602200 | Tomato soup, canned, reduced sodium, prepared with water, or ready-to-serve                                                            | 8000_Mixed | 46 | 54 | -8 | 4 | 3.5 | B |
| 27564430 | Frankfurter or hot dog sandwich, meatless, plain, on bread                                                                             | 8000_Mixed | 46 | 53 | -7 | 4 | 4   | B |
| 14640048 | Cheese sandwich, reduced fat Cheddar cheese, on whole wheat bread, with mayonnaise                                                     | 8000_Mixed | 46 | 52 | -6 | 4 | 2   | D |
| 74606020 | Tomato vegetable soup with noodles, prepared with water                                                                                | 8000_Mixed | 46 | 50 | -4 | 4 | 3.5 | C |
| 27141000 | Chicken or turkey cacciatore                                                                                                           | 8000_Mixed | 46 | 47 | -1 | 4 | 3.5 | D |
| 42301010 | Peanut butter sandwich, NFS                                                                                                            | 8000_Mixed | 46 | 47 | -1 | 3 | 2.5 | D |
| 42301015 | Peanut butter sandwich, with regular peanut butter, on white bread                                                                     | 8000_Mixed | 46 | 47 | -1 | 3 | 2.5 | D |
| 41210000 | Bean cake                                                                                                                              | 8000_Mixed | 46 | 46 | 0  | 2 | 2.5 | D |
| 28150810 | Scallops with potatoes, vegetable (frozen meal)                                                                                        | 8000_Mixed | 46 | 45 | 1  | 4 | 3.5 | C |
| 58104080 | Nachos with beef, beans, cheese, and sour cream                                                                                        | 8000_Mixed | 46 | 44 | 2  | 3 | 3.5 | D |
| 27545010 | Turkey or chicken burger, with condiments, on bun, from fast food / restaurant                                                         | 8000_Mixed | 46 | 43 | 3  | 3 | 3.5 | C |
| 27545200 | Turkey or chicken burger, with condiments, on white bun                                                                                | 8000_Mixed | 46 | 43 | 3  | 3 | 3.5 | C |
| 28152050 | Shrimp with rice, vegetable (frozen meal)                                                                                              | 8000_Mixed | 46 | 43 | 3  | 4 | 3.5 | C |
| 27350070 | Tuna pot pie                                                                                                                           | 8000_Mixed | 46 | 42 | 4  | 3 | 3.5 | C |
| 27540153 | Chicken fillet sandwich, grilled, from fast food, with cheese                                                                          | 8000_Mixed | 46 | 42 | 4  | 3 | 3.5 | D |
| 58101945 | Taco or tostada salad with meat and sour cream                                                                                         | 8000_Mixed | 46 | 42 | 4  | 2 | 3.5 | C |
| 27345420 | Chicken or turkey, rice, and vegetables excluding carrots, broccoli, and dark-green leafy; cream sauce, white sauce, or mushroom sauce | 8000_Mixed | 46 | 41 | 5  | 2 | 3.5 | C |
| 27540152 | Chicken fillet sandwich, grilled, from fast food                                                                                       | 8000_Mixed | 46 | 41 | 5  | 3 | 4   | B |
| 27545100 | Turkey or chicken burger, on white bun                                                                                                 | 8000_Mixed | 46 | 41 | 5  | 2 | 4   | A |
| 28345160 | Chicken or turkey mushroom soup, cream of, prepared with milk                                                                          | 8000_Mixed | 46 | 41 | 5  | 3 | 3.5 | C |
| 58100180 | Burrito with pork and beans                                                                                                            | 8000_Mixed | 46 | 41 | 5  | 3 | 4   | B |
| 75600150 | Soup, cream of, NFS                                                                                                                    | 8000_Mixed | 46 | 41 | 5  | 3 | 3.5 | B |
| 75602010 | Cauliflower soup, cream of, prepared with milk                                                                                         | 8000_Mixed | 46 | 41 | 5  | 1 | 3.5 | C |
| 75607080 | Mushroom with chicken soup, cream of, prepared with milk                                                                               | 8000_Mixed | 46 | 41 | 5  | 3 | 3.5 | C |
| 27315310 | Beef, rice, and vegetables including carrots, broccoli, and/or dark-green leafy; mushroom sauce                                        | 8000_Mixed | 46 | 40 | 6  | 2 | 3.5 | C |
| 27315410 | Beef, rice, and vegetables including carrots, broccoli, and/or dark-green leafy; gravy                                                 | 8000_Mixed | 46 | 40 | 6  | 2 | 3.5 | C |
| 27320500 | Sweet and sour pork with rice                                                                                                          | 8000_Mixed | 46 | 40 | 6  | 2 | 3.5 | C |
| 58163410 | Spanish rice, fat added                                                                                                                | 8000_Mixed | 46 | 40 | 6  | 1 | 3.5 | C |
| 27243300 | Chicken or turkey and rice with cream sauce                                                                                            | 8000_Mixed | 46 | 39 | 7  | 2 | 3.5 | C |

|          |                                                                                                                                               |            |    |    |    |   |     |   |
|----------|-----------------------------------------------------------------------------------------------------------------------------------------------|------------|----|----|----|---|-----|---|
| 27443120 | Chicken or turkey a la king with vegetables excluding carrots, broccoli, and dark-green leafy; no potatoes, cream, white, or soup-based sauce | 8000_Mixed | 46 | 39 | 7  | 2 | 3   | D |
| 27118120 | Stewed seasoned ground beef, Puerto Rican style                                                                                               | 8000_Mixed | 46 | 38 | 8  | 2 | 2   | D |
| 27242350 | Chicken or turkey tetrazzini                                                                                                                  | 8000_Mixed | 46 | 38 | 8  | 2 | 3.5 | B |
| 58101510 | Taco or tostada with chicken or turkey, lettuce, tomato and salsa                                                                             | 8000_Mixed | 46 | 38 | 8  | 3 | 4   | A |
| 58136140 | Lo mein, with pork                                                                                                                            | 8000_Mixed | 46 | 38 | 8  | 1 | 3.5 | C |
| 58135110 | Chow fun noodles with meat and vegetables                                                                                                     | 8000_Mixed | 46 | 37 | 9  | 1 | 4   | A |
| 27260010 | Meat loaf, NS as to type of meat                                                                                                              | 8000_Mixed | 46 | 36 | 10 | 1 | 3.5 | D |
| 27411150 | Beef rolls, stuffed with vegetables or meat mixture, tomato-based sauce                                                                       | 8000_Mixed | 46 | 36 | 10 | 1 | 4   | B |
| 58131110 | Ravioli, NS as to filling, with tomato sauce                                                                                                  | 8000_Mixed | 46 | 36 | 10 | 2 | 3   | C |
| 58147340 | Macaroni or noodles, creamed, with cheese and tuna                                                                                            | 8000_Mixed | 46 | 35 | 11 | 2 | 3.5 | C |
| 27150060 | Lobster newburg                                                                                                                               | 8000_Mixed | 46 | 33 | 13 | 2 | 1.5 | D |
| 14640034 | Cheese sandwich, Cheddar cheese, on wheat bread, with mayonnaise                                                                              | 8000_Mixed | 45 | 51 | -6 | 4 | 1.5 | D |
| 75651040 | Vegetable noodle soup, canned, prepared with water, or ready-to-serve                                                                         | 8000_Mixed | 45 | 49 | -4 | 4 | 3.5 | B |
| 75654010 | Vegetarian vegetable soup, prepared with water                                                                                                | 8000_Mixed | 45 | 49 | -4 | 4 | 3.5 | B |
| 27550730 | Tuna salad sandwich, on bread, with cheese                                                                                                    | 8000_Mixed | 45 | 48 | -3 | 4 | 3   | D |
| 14640070 | Cheese sandwich, reduced fat Cheddar cheese, on wheat bread, with butter                                                                      | 8000_Mixed | 45 | 47 | -2 | 3 | 1.5 | E |
| 42301115 | Peanut butter sandwich, with reduced fat peanut butter, on white bread                                                                        | 8000_Mixed | 45 | 47 | -2 | 3 | 3.5 | D |
| 58146373 | Pasta with tomato-based sauce, seafood, and added vegetables, ready-to-heat                                                                   | 8000_Mixed | 45 | 47 | -2 | 4 | 3.5 | B |
| 58146363 | Pasta with tomato-based sauce and seafood, ready-to-heat                                                                                      | 8000_Mixed | 45 | 46 | -1 | 4 | 3.5 | C |
| 27347200 | Chicken or turkey, stuffing, and vegetables including carrots, broccoli, and/or dark-green leafy; no sauce                                    | 8000_Mixed | 45 | 45 | 0  | 3 | 3.5 | C |
| 51136000 | Bruschetta                                                                                                                                    | 8000_Mixed | 45 | 43 | 2  | 3 | 3.5 | C |
| 75607100 | Mushroom soup, cream of, canned, reduced sodium, prepared with milk                                                                           | 8000_Mixed | 45 | 43 | 2  | 3 | 3.5 | C |
| 27540196 | Chicken fillet sandwich, grilled, on white bun, with cheese                                                                                   | 8000_Mixed | 45 | 42 | 3  | 3 | 3.5 | C |
| 27550710 | Tuna salad sandwich, with lettuce                                                                                                             | 8000_Mixed | 45 | 42 | 3  | 4 | 3.5 | B |
| 58146441 | Pasta with cream sauce and seafood, restaurant                                                                                                | 8000_Mixed | 45 | 42 | 3  | 2 | 2.5 | D |
| 27116300 | Beef with sweet and sour sauce                                                                                                                | 8000_Mixed | 45 | 40 | 5  | 2 | 3.5 | C |
| 27347250 | Chicken or turkey, dumplings, and vegetables excluding carrots, broccoli, and dark green leafy; gravy                                         | 8000_Mixed | 45 | 40 | 5  | 2 | 3.5 | C |
| 27420270 | Ham and vegetables excluding carrots, broccoli, and dark-green leafy; no potatoes, no sauce                                                   | 8000_Mixed | 45 | 40 | 5  | 2 | 3   | D |
| 27516010 | Gyro sandwich (pita bread, beef, lamb, onion, condiments), with tomato and spread                                                             | 8000_Mixed | 45 | 40 | 5  | 3 | 4   | B |
| 74601010 | Tomato soup, cream of, prepared with milk                                                                                                     | 8000_Mixed | 45 | 40 | 5  | 3 | 3.5 | B |
| 27146250 | Chicken or turkey cordon bleu                                                                                                                 | 8000_Mixed | 45 | 39 | 6  | 2 | 3.5 | D |
| 27212120 | Chili con carne with beans and macaroni                                                                                                       | 8000_Mixed | 45 | 39 | 6  | 3 | 3.5 | C |
| 27510710 | Pizzaburger (hamburger, cheese, sauce) on 1/2 bun                                                                                             | 8000_Mixed | 45 | 39 | 6  | 2 | 3.5 | C |

|          |                                                                                                   |            |    |    |    |   |     |   |
|----------|---------------------------------------------------------------------------------------------------|------------|----|----|----|---|-----|---|
| 27545000 | Turkey or chicken burger, plain, on bun, from fast food / restaurant                              | 8000_Mixed | 45 | 39 | 6  | 2 | 4   | B |
| 58122210 | Gnocchi, cheese                                                                                   | 8000_Mixed | 45 | 39 | 6  | 3 | 3   | C |
| 58145130 | Macaroni or noodles with cheese and beef                                                          | 8000_Mixed | 45 | 39 | 6  | 3 | 3.5 | C |
| 58160700 | Rice, white, with other vegetables, NS as to fat                                                  | 8000_Mixed | 45 | 39 | 6  | 1 | 3.5 | C |
| 58160720 | Rice, white, with other vegetables, fat added                                                     | 8000_Mixed | 45 | 39 | 6  | 1 | 3.5 | C |
| 58163430 | Spanish rice, NS as to fat                                                                        | 8000_Mixed | 45 | 39 | 6  | 1 | 3.5 | C |
| 58408500 | Noodle soup with vegetables, Asian style                                                          | 8000_Mixed | 45 | 39 | 6  | 2 | 3.5 | B |
| 27214300 | Beef wellington                                                                                   | 8000_Mixed | 45 | 38 | 7  | 2 | 2   | D |
| 58133130 | Manicotti, cheese-filled, with meat sauce                                                         | 8000_Mixed | 45 | 37 | 8  | 2 | 3   | C |
| 27111500 | Beef sloppy joe, no bun                                                                           | 8000_Mixed | 45 | 36 | 9  | 2 | 3   | C |
| 28320140 | Ham, noodle, and vegetable soup, Puerto Rican style                                               | 8000_Mixed | 45 | 36 | 9  | 2 | 3   | C |
| 58131120 | Ravioli, NS as to filling, with cream sauce                                                       | 8000_Mixed | 45 | 36 | 9  | 2 | 3.5 | C |
| 58163450 | Spanish rice with ground beef                                                                     | 8000_Mixed | 45 | 36 | 9  | 1 | 3.5 | C |
| 75418000 | Squash, summer, yellow or green, breaded or battered, baked                                       | 8000_Mixed | 45 | 35 | 10 | 1 | 3.5 | A |
| 27114000 | Beef with mushroom sauce                                                                          | 8000_Mixed | 45 | 34 | 11 | 1 | 4   | B |
| 27135030 | Veal with cream sauce                                                                             | 8000_Mixed | 45 | 34 | 11 | 1 | 4   | B |
| 27235000 | Meat loaf made with venison/deer                                                                  | 8000_Mixed | 45 | 34 | 11 | 1 | 3.5 | B |
| 27135010 | Veal with gravy                                                                                   | 8000_Mixed | 45 | 33 | 12 | 1 | 4   | A |
| 27460510 | Antipasto with ham, fish, cheese, vegetables                                                      | 8000_Mixed | 45 | 33 | 12 | 3 | 2   | D |
| 58157300 | Congee, with meat, poultry, and/or seafood                                                        | 8000_Mixed | 45 | 33 | 12 | 1 | 3.5 | B |
| 27450130 | Crab salad made with imitation crab                                                               | 8000_Mixed | 44 | 53 | -9 | 4 | 2.5 | D |
| 58109150 | Pizza, cheese and vegetables, gluten-free thick crust                                             | 8000_Mixed | 44 | 50 | -6 | 4 | 3   | C |
| 27564560 | Frankfurter or hot dog sandwich, meatless, on bun, with meatless chili                            | 8000_Mixed | 44 | 49 | -5 | 4 | 4   | B |
| 58106570 | Pizza with pepperoni, from school lunch, thin crust                                               | 8000_Mixed | 44 | 49 | -5 | 4 | 3.5 | D |
| 14640190 | Grilled cheese sandwich, reduced fat Cheddar cheese, on wheat bread                               | 8000_Mixed | 44 | 46 | -2 | 3 | 1.5 | E |
| 27550755 | Tuna salad wrap sandwich                                                                          | 8000_Mixed | 44 | 46 | -2 | 4 | 2   | D |
| 14640195 | Grilled cheese sandwich, reduced fat Cheddar cheese, on whole wheat bread                         | 8000_Mixed | 44 | 45 | -1 | 3 | 1.5 | E |
| 27540320 | Turkey salad or turkey spread sandwich                                                            | 8000_Mixed | 44 | 45 | -1 | 3 | 4   | B |
| 28315050 | Beef vegetable soup with potato, pasta, or rice, chunky style, canned, or ready-to-serve          | 8000_Mixed | 44 | 45 | -1 | 4 | 3.5 | C |
| 32203010 | Egg salad sandwich                                                                                | 8000_Mixed | 44 | 44 | 0  | 3 | 3   | D |
| 42302105 | Peanut butter and jelly sandwich, with regular peanut butter, reduced sugar jelly, on white bread | 8000_Mixed | 44 | 43 | 1  | 3 | 2.5 | D |
| 58109050 | Pizza, cheese and vegetables, whole wheat thin crust                                              | 8000_Mixed | 44 | 42 | 2  | 3 | 3.5 | D |
| 28340650 | Chicken vegetable soup with rice, stew type, chunky style, prepared with milk                     | 8000_Mixed | 44 | 41 | 3  | 3 | 3.5 | C |
| 58148500 | Pasta or macaroni salad with oil and vinegar-type dressing                                        | 8000_Mixed | 44 | 41 | 3  | 2 | 3   | C |
| 27540300 | Chicken fillet wrap sandwich, grilled, from fast food                                             | 8000_Mixed | 44 | 40 | 4  | 3 | 2   | D |
| 58100310 | Burrito with beans, meatless                                                                      | 8000_Mixed | 44 | 40 | 4  | 3 | 3.5 | C |

|          |                                                                                              |            |    |    |    |   |     |   |
|----------|----------------------------------------------------------------------------------------------|------------|----|----|----|---|-----|---|
| 58101600 | Soft taco with bean, cheese, and lettuce                                                     | 8000_Mixed | 44 | 40 | 4  | 3 | 3.5 | C |
| 58421000 | Sopa seca, Mexican style, NFS                                                                | 8000_Mixed | 44 | 40 | 4  | 2 | 3   | C |
| 75608010 | Onion soup, cream of, prepared with milk                                                     | 8000_Mixed | 44 | 40 | 4  | 3 | 3   | C |
| 27146350 | Orange chicken                                                                               | 8000_Mixed | 44 | 39 | 5  | 1 | 2   | D |
| 27520160 | Bacon, chicken, and tomato club sandwich, on multigrain roll with lettuce and spread         | 8000_Mixed | 44 | 39 | 5  | 3 | 3.5 | D |
| 27113100 | Beef stroganoff                                                                              | 8000_Mixed | 44 | 38 | 6  | 2 | 3   | C |
| 27315320 | Beef, rice, and vegetables excluding carrots, broccoli, and dark-green leafy; mushroom sauce | 8000_Mixed | 44 | 38 | 6  | 2 | 3.5 | C |
| 27315420 | Beef, rice, and vegetables excluding carrots, broccoli, and dark-green leafy; gravy          | 8000_Mixed | 44 | 38 | 6  | 2 | 3.5 | C |
| 27317100 | Beef, dumplings, and vegetables including carrots, broccoli, and/or dark-green leafy; gravy  | 8000_Mixed | 44 | 38 | 6  | 2 | 3.5 | C |
| 58160400 | Rice, white, with corn, NS as to fat                                                         | 8000_Mixed | 44 | 38 | 6  | 1 | 3.5 | B |
| 58160420 | Rice, white, with corn, fat added                                                            | 8000_Mixed | 44 | 38 | 6  | 1 | 3.5 | B |
| 58200300 | Wrap sandwich, filled with meat, poultry, or fish, vegetables, rice, and cheese              | 8000_Mixed | 44 | 38 | 6  | 2 | 3.5 | C |
| 74604600 | Tomato noodle soup, canned, prepared with milk                                               | 8000_Mixed | 44 | 38 | 6  | 2 | 3.5 | B |
| 75410550 | Stuffed jalapeno pepper                                                                      | 8000_Mixed | 44 | 38 | 6  | 3 | 3   | D |
| 75411033 | Corn, cooked, from canned, with cream sauce, made with milk                                  | 8000_Mixed | 44 | 38 | 6  | 2 | 3.5 | C |
| 75418030 | Squash, summer, casserole, with rice and tomato sauce                                        | 8000_Mixed | 44 | 38 | 6  | 2 | 4   | A |
| 27212400 | Beef and noodles with mushroom sauce                                                         | 8000_Mixed | 44 | 37 | 7  | 2 | 3.5 | B |
| 27236000 | Venison or deer and noodles with cream or white sauce                                        | 8000_Mixed | 44 | 37 | 7  | 1 | 3.5 | C |
| 27242310 | Chicken or turkey and noodles with cheese sauce                                              | 8000_Mixed | 44 | 37 | 7  | 2 | 3.5 | C |
| 27319010 | Stuffed green pepper, Puerto Rican style                                                     | 8000_Mixed | 44 | 37 | 7  | 2 | 3.5 | C |
| 58116110 | Meat turnover, Puerto Rican style                                                            | 8000_Mixed | 44 | 37 | 7  | 1 | 3.5 | C |
| 58133120 | Manicotti, cheese-filled, with tomato sauce, meatless                                        | 8000_Mixed | 44 | 37 | 7  | 2 | 3   | C |
| 58136110 | Lo mein, NFS                                                                                 | 8000_Mixed | 44 | 37 | 7  | 1 | 3.5 | C |
| 58136120 | Lo mein, meatless                                                                            | 8000_Mixed | 44 | 37 | 7  | 1 | 3.5 | C |
| 58147350 | Macaroni, creamed, with vegetables                                                           | 8000_Mixed | 44 | 37 | 7  | 1 | 3.5 | C |
| 58160304 | Rice with peas, fat added in cooking                                                         | 8000_Mixed | 44 | 37 | 7  | 1 | 3.5 | C |
| 58200100 | Wrap sandwich, filled with meat, poultry, or fish, vegetables, and rice                      | 8000_Mixed | 44 | 37 | 7  | 2 | 3.5 | C |
| 27118110 | Meatballs, Puerto Rican style                                                                | 8000_Mixed | 44 | 36 | 8  | 2 | 2   | D |
| 27212200 | Beef and noodles with gravy                                                                  | 8000_Mixed | 44 | 36 | 8  | 1 | 3.5 | B |
| 27218110 | Stuffed pot roast, with potatoes, Puerto Rican style                                         | 8000_Mixed | 44 | 36 | 8  | 2 | 1.5 | E |
| 27315020 | Beef, rice, and vegetables excluding carrots, broccoli, and dark-green leafy; no sauce       | 8000_Mixed | 44 | 36 | 8  | 1 | 3.5 | C |
| 27363100 | Jambalaya with meat and rice                                                                 | 8000_Mixed | 44 | 36 | 8  | 2 | 3.5 | C |
| 58134120 | Stuffed shells, cheese-filled, with tomato sauce, meatless                                   | 8000_Mixed | 44 | 36 | 8  | 2 | 3   | C |
| 58146452 | Pasta with cream sauce, seafood, and added vegetables, home recipe                           | 8000_Mixed | 44 | 35 | 9  | 2 | 3.5 | C |
| 27142100 | Chicken or turkey fricassee                                                                  | 8000_Mixed | 44 | 34 | 10 | 1 | 3.5 | C |

|          |                                                                                                                                                 |            |    |    |    |   |     |   |
|----------|-------------------------------------------------------------------------------------------------------------------------------------------------|------------|----|----|----|---|-----|---|
| 27212000 | Beef and noodles, no sauce                                                                                                                      | 8000_Mixed | 44 | 34 | 10 | 1 | 3.5 | C |
| 27420200 | Pork hash                                                                                                                                       | 8000_Mixed | 44 | 34 | 10 | 1 | 3   | D |
| 27112000 | Beef with gravy                                                                                                                                 | 8000_Mixed | 44 | 33 | 11 | 1 | 4   | A |
| 27113000 | Beef with cream or white sauce                                                                                                                  | 8000_Mixed | 44 | 33 | 11 | 1 | 4   | B |
| 27163010 | Meat with gravy, NS as to type of meat,                                                                                                         | 8000_Mixed | 44 | 33 | 11 | 1 | 4   | A |
| 58109100 | Pizza, cheese, gluten-free thin crust                                                                                                           | 8000_Mixed | 43 | 49 | -6 | 4 | 3   | D |
| 58109140 | Pizza, cheese and vegetables, gluten-free thin crust                                                                                            | 8000_Mixed | 43 | 49 | -6 | 4 | 3   | C |
| 75340160 | Vegetable and pasta combinations with cream or cheese sauce, broccoli, pasta, carrots, corn, zucchini, peppers, cauliflower, peas, etc., cooked | 8000_Mixed | 43 | 47 | -4 | 4 | 3.5 | C |
| 14640012 | Cheese sandwich, Cheddar cheese, on whole wheat bread, no spread                                                                                | 8000_Mixed | 43 | 46 | -3 | 3 | 2   | D |
| 28350220 | Clam chowder, Manhattan                                                                                                                         | 8000_Mixed | 43 | 46 | -3 | 4 | 3.5 | C |
| 14640022 | Cheese sandwich, reduced fat Cheddar cheese, on wheat bread, no spread                                                                          | 8000_Mixed | 43 | 44 | -1 | 4 | 2.5 | D |
| 28113110 | Salisbury steak, baked, with tomato sauce, vegetable, diet frozen meal                                                                          | 8000_Mixed | 43 | 44 | -1 | 4 | 4   | B |
| 28141050 | Chicken patty parmigiana, breaded, with vegetable, diet frozen meal                                                                             | 8000_Mixed | 43 | 44 | -1 | 4 | 3.5 | C |
| 58403060 | Chicken or turkey noodle soup, reduced sodium, canned or ready-to-serve                                                                         | 8000_Mixed | 43 | 44 | -1 | 4 | 3.5 | B |
| 28143030 | Chicken and vegetable entree, oriental (diet frozen meal)                                                                                       | 8000_Mixed | 43 | 43 | 0  | 4 | 4   | B |
| 42302155 | Peanut butter and jelly sandwich, with reduced fat peanut butter, reduced sugar jelly, on white bread                                           | 8000_Mixed | 43 | 43 | 0  | 3 | 3.5 | D |
| 75142600 | Cucumber salad made with cucumber and vinegar                                                                                                   | 8000_Mixed | 43 | 43 | 0  | 2 | 3.5 | B |
| 27347210 | Chicken or turkey, stuffing, and vegetables excluding carrots, broccoli, and dark green leafy; no sauce                                         | 8000_Mixed | 43 | 42 | 1  | 3 | 3.5 | C |
| 75603000 | Celery soup, cream of, NS as to made with milk or water                                                                                         | 8000_Mixed | 43 | 42 | 1  | 3 | 3   | C |
| 58156410 | Rice with onions, Puerto Rican style                                                                                                            | 8000_Mixed | 43 | 41 | 2  | 3 | 3   | C |
| 27260500 | Vienna sausages stewed with potatoes, Puerto Rican style                                                                                        | 8000_Mixed | 43 | 40 | 3  | 3 | 3.5 | C |
| 58101540 | Taco or tostada with fish                                                                                                                       | 8000_Mixed | 43 | 40 | 3  | 3 | 3.5 | D |
| 58146431 | Pasta with cream sauce, poultry, and added vegetables, restaurant                                                                               | 8000_Mixed | 43 | 39 | 4  | 2 | 3   | D |
| 58148111 | Macaroni or pasta salad, made with light mayonnaise                                                                                             | 8000_Mixed | 43 | 39 | 4  | 2 | 3.5 | B |
| 75605010 | Leek soup, cream of, prepared with milk                                                                                                         | 8000_Mixed | 43 | 39 | 4  | 3 | 3   | C |
| 27243000 | Chicken or turkey and rice, no sauce                                                                                                            | 8000_Mixed | 43 | 37 | 6  | 1 | 3.5 | C |
| 58105000 | Fajita with chicken and vegetables                                                                                                              | 8000_Mixed | 43 | 37 | 6  | 3 | 3.5 | C |
| 58145190 | Macaroni or noodles with cheese and chicken or turkey                                                                                           | 8000_Mixed | 43 | 37 | 6  | 3 | 3.5 | B |
| 58160200 | Rice with vegetables (including carrots, broccoli, and/or dark-green leafy), no sauce, NS as to fat added in cooking                            | 8000_Mixed | 43 | 37 | 6  | 2 | 3   | C |
| 58160204 | Rice with vegetables (including carrots, broccoli, and/or dark-green leafy), no sauce, fat added in cooking                                     | 8000_Mixed | 43 | 37 | 6  | 1 | 3.5 | C |
| 58165030 | Rice, white, with vegetables and gravy, NS as to fat                                                                                            | 8000_Mixed | 43 | 37 | 6  | 2 | 3.5 | C |
| 75142500 | Cucumber salad, made with sour cream dressing                                                                                                   | 8000_Mixed | 43 | 37 | 6  | 2 | 3.5 | B |
| 27146011 | Chicken, shredded or pulled, with barbecue sauce                                                                                                | 8000_Mixed | 43 | 36 | 7  | 2 | 3.5 | D |
| 27212350 | Beef stroganoff with noodles                                                                                                                    | 8000_Mixed | 43 | 36 | 7  | 2 | 3.5 | C |

|          |                                                                                                                   |            |    |    |    |   |     |   |
|----------|-------------------------------------------------------------------------------------------------------------------|------------|----|----|----|---|-----|---|
| 58130010 | Lasagna with meat and/or poultry                                                                                  | 8000_Mixed | 43 | 36 | 7  | 2 | 3.5 | C |
| 58160205 | Rice with vegetables (excluding carrots, broccoli, and dark-green leafy), no sauce, NS as to fat added in cooking | 8000_Mixed | 43 | 36 | 7  | 1 | 3.5 | C |
| 58160209 | Rice with vegetables (excluding carrots, broccoli, and dark-green leafy), no sauce, fat added in cooking          | 8000_Mixed | 43 | 36 | 7  | 1 | 3.5 | C |
| 58403050 | Chicken or turkey noodle soup, cream of, home recipe, canned, or ready-to-serve                                   | 8000_Mixed | 43 | 36 | 7  | 2 | 3.5 | C |
| 27311220 | Corned beef, potatoes, and vegetables excluding carrots, broccoli, and dark-green leafy; no sauce                 | 8000_Mixed | 43 | 35 | 8  | 2 | 4   | A |
| 58134610 | Tortellini, meat-filled, with tomato sauce                                                                        | 8000_Mixed | 43 | 35 | 8  | 2 | 3   | C |
| 58134640 | Tortellini, cheese-filled, meatless, with vinaigrette dressing                                                    | 8000_Mixed | 43 | 35 | 8  | 2 | 2.5 | D |
| 58160560 | Rice, white, with dark green vegetables, no added fat                                                             | 8000_Mixed | 43 | 35 | 8  | 1 | 3.5 | B |
| 58131530 | Ravioli, cheese-filled, with meat sauce                                                                           | 8000_Mixed | 43 | 34 | 9  | 2 | 3   | C |
| 27260050 | Meatballs, with breading, NS as to type of meat, with gravy                                                       | 8000_Mixed | 43 | 33 | 10 | 2 | 3.5 | C |
| 27246400 | Chicken or turkey souffle                                                                                         | 8000_Mixed | 43 | 31 | 12 | 1 | 3   | D |
| 58156110 | Fried rice, Puerto Rican style                                                                                    | 8000_Mixed | 43 | 26 | 17 | 1 | 3   | D |
| 14640042 | Cheese sandwich, reduced fat American cheese, on whole wheat bread, with mayonnaise                               | 8000_Mixed | 42 | 51 | -9 | 4 | 2   | D |
| 58106236 | Pizza, cheese, from school lunch, thick crust                                                                     | 8000_Mixed | 42 | 48 | -6 | 4 | 3.5 | D |
| 58106578 | Pizza, with pepperoni, from school lunch, medium crust                                                            | 8000_Mixed | 42 | 47 | -5 | 4 | 3.5 | D |
| 75651010 | Minestrone soup, canned, prepared with water, or ready-to-serve                                                   | 8000_Mixed | 42 | 47 | -5 | 4 | 3.5 | C |
| 14640072 | Cheese sandwich, reduced fat Cheddar cheese, on whole wheat bread, with butter                                    | 8000_Mixed | 42 | 44 | -2 | 3 | 1.5 | E |
| 27540120 | Chicken salad or chicken spread sandwich                                                                          | 8000_Mixed | 42 | 42 | 0  | 3 | 3.5 | C |
| 58125120 | Spinach quiche, meatless                                                                                          | 8000_Mixed | 42 | 41 | 1  | 3 | 1.5 | D |
| 28150910 | Shrimp with potatoes, vegetable (frozen meal)                                                                     | 8000_Mixed | 42 | 40 | 2  | 4 | 3.5 | C |
| 58109015 | Pizza, cheese, whole wheat thin crust                                                                             | 8000_Mixed | 42 | 40 | 2  | 3 | 2.5 | D |
| 27550300 | Fish sandwich, NFS                                                                                                | 8000_Mixed | 42 | 39 | 3  | 3 | 2   | D |
| 41812400 | Vegetarian pot pie                                                                                                | 8000_Mixed | 42 | 38 | 4  | 3 | 3.5 | C |
| 58104490 | Chimichanga, NFS                                                                                                  | 8000_Mixed | 42 | 38 | 4  | 3 | 3.5 | C |
| 58148112 | Macaroni or pasta salad, made with mayonnaise-type salad dressing                                                 | 8000_Mixed | 42 | 38 | 4  | 2 | 3.5 | B |
| 75601000 | Asparagus soup, cream of, NS as to made with milk or water                                                        | 8000_Mixed | 42 | 38 | 4  | 3 | 3.5 | C |
| 27213150 | Chili con carne with beans and rice                                                                               | 8000_Mixed | 42 | 37 | 5  | 3 | 3.5 | C |
| 27320120 | Sausage, potatoes, and vegetables including carrots, broccoli, and/or dark-green leafy; gravy                     | 8000_Mixed | 42 | 37 | 5  | 3 | 3.5 | C |
| 27515050 | Fajita-style beef sandwich with cheese, on pita bread, with lettuce and tomato                                    | 8000_Mixed | 42 | 37 | 5  | 3 | 3.5 | C |
| 58146411 | Pasta with cream sauce, meat, and added vegetables, restaurant                                                    | 8000_Mixed | 42 | 37 | 5  | 2 | 2.5 | D |
| 27243400 | Chicken or turkey and rice with mushroom sauce                                                                    | 8000_Mixed | 42 | 36 | 6  | 2 | 3.5 | C |
| 27317110 | Beef, dumplings, and vegetables excluding carrots, broccoli, and dark-green leafy; gravy                          | 8000_Mixed | 42 | 36 | 6  | 2 | 3.5 | C |
| 28345020 | Chicken or turkey soup, cream of, canned, reduced sodium, made with milk                                          | 8000_Mixed | 42 | 36 | 6  | 3 | 3.5 | B |
| 58100005 | Burrito, taco, or quesadilla with egg and potato                                                                  | 8000_Mixed | 42 | 36 | 6  | 3 | 3   | D |

|          |                                                                                                            |            |    |    |    |   |     |   |
|----------|------------------------------------------------------------------------------------------------------------|------------|----|----|----|---|-----|---|
| 58105050 | Fajita with meat and vegetables                                                                            | 8000_Mixed | 42 | 36 | 6  | 3 | 3.5 | C |
| 58165020 | Rice, white, with vegetables, cheese and/or cream based sauce, fat added                                   | 8000_Mixed | 42 | 36 | 6  | 2 | 3.5 | C |
| 75604510 | Cucumber soup, cream of, prepared with milk                                                                | 8000_Mixed | 42 | 36 | 6  | 1 | 3   | C |
| 27345440 | Chicken or turkey, rice, and vegetables including carrots, broccoli, and/or dark-green leafy; cheese sauce | 8000_Mixed | 42 | 35 | 7  | 2 | 3.5 | C |
| 58165050 | Rice, white, with vegetables and gravy, fat added                                                          | 8000_Mixed | 42 | 35 | 7  | 2 | 3.5 | C |
| 27235750 | Veal and noodles with cream or white sauce                                                                 | 8000_Mixed | 42 | 34 | 8  | 1 | 3.5 | C |
| 27242300 | Chicken or turkey and noodles with cream or white sauce                                                    | 8000_Mixed | 42 | 34 | 8  | 1 | 3.5 | C |
| 27250820 | Fish and rice with cream sauce                                                                             | 8000_Mixed | 42 | 34 | 8  | 1 | 3.5 | C |
| 58131535 | Ravioli, cheese-filled, with cream sauce                                                                   | 8000_Mixed | 42 | 34 | 8  | 2 | 3   | C |
| 27115100 | Steak teriyaki                                                                                             | 8000_Mixed | 42 | 32 | 10 | 1 | 3.5 | D |
| 58131100 | Ravioli, NS as to filling, no sauce                                                                        | 8000_Mixed | 42 | 30 | 12 | 1 | 3.5 | C |
| 58134650 | Tortellini, meat-filled, no sauce                                                                          | 8000_Mixed | 42 | 30 | 12 | 2 | 3.5 | C |
| 58151130 | Sushi, with vegetables and seafood                                                                         | 8000_Mixed | 42 | 29 | 13 | 1 | 3   | C |
| 14640028 | Cheese sandwich, American cheese, on wheat bread, with mayonnaise                                          | 8000_Mixed | 41 | 50 | -9 | 4 | 1.5 | E |
| 58301110 | Vegetable lasagna, frozen meal                                                                             | 8000_Mixed | 41 | 46 | -5 | 4 | 3.5 | B |
| 58146733 | Pasta, whole grain, with cream sauce, poultry, and added vegetables, ready-to-heat                         | 8000_Mixed | 41 | 45 | -4 | 4 | 3.5 | C |
| 28310120 | Beef, broth, bouillon, or consomme, canned, low sodium                                                     | 8000_Mixed | 41 | 44 | -3 | 4 | 3.5 | A |
| 28340170 | Chicken broth, canned, low sodium                                                                          | 8000_Mixed | 41 | 44 | -3 | 4 | 3.5 | A |
| 28133210 | Veal parmigiana with vegetable (diet frozen meal)                                                          | 8000_Mixed | 41 | 43 | -2 | 4 | 4   | A |
| 14640010 | Cheese sandwich, Cheddar cheese, on wheat bread, no spread                                                 | 8000_Mixed | 41 | 42 | -1 | 3 | 2   | D |
| 58104270 | Gordita, sope, or chalupa with beans and sour cream                                                        | 8000_Mixed | 41 | 39 | 2  | 3 | 3.5 | C |
| 27540110 | Sliced chicken sandwich, with spread                                                                       | 8000_Mixed | 41 | 38 | 3  | 3 | 4   | B |
| 58101240 | Flauta with chicken                                                                                        | 8000_Mixed | 41 | 38 | 3  | 3 | 3.5 | C |
| 27345230 | Chicken or turkey, rice, corn, and cheese, with gravy                                                      | 8000_Mixed | 41 | 37 | 4  | 3 | 3   | C |
| 27550425 | Fish wrap sandwich                                                                                         | 8000_Mixed | 41 | 37 | 4  | 3 | 2   | D |
| 58100330 | Burrito with beans, rice, and sour cream, meatless                                                         | 8000_Mixed | 41 | 37 | 4  | 3 | 3   | D |
| 58145120 | Macaroni or noodles with cheese and tuna                                                                   | 8000_Mixed | 41 | 37 | 4  | 3 | 3.5 | C |
| 75601010 | Asparagus soup, cream of, prepared with milk                                                               | 8000_Mixed | 41 | 37 | 4  | 3 | 3.5 | C |
| 27515030 | Steak and cheese sandwich, plain, on roll                                                                  | 8000_Mixed | 41 | 36 | 5  | 3 | 3   | D |
| 58163610 | Rice-vegetable medley                                                                                      | 8000_Mixed | 41 | 36 | 5  | 2 | 3   | C |
| 58421060 | Sopa seca de arroz, home recipe, Mexican style                                                             | 8000_Mixed | 41 | 36 | 5  | 2 | 3   | C |
| 71801010 | Potato soup, cream of, prepared with milk                                                                  | 8000_Mixed | 41 | 36 | 5  | 3 | 3   | C |
| 75609010 | Pea soup, prepared with milk                                                                               | 8000_Mixed | 41 | 36 | 5  | 3 | 3.5 | C |
| 58108010 | Calzone, with meat and cheese                                                                              | 8000_Mixed | 41 | 35 | 6  | 2 | 2   | D |
| 58145135 | Macaroni or noodles with cheese and meat                                                                   | 8000_Mixed | 41 | 35 | 6  | 2 | 3.5 | C |
| 58160310 | Rice with peas and carrots, NS as to fat added in cooking                                                  | 8000_Mixed | 41 | 35 | 6  | 1 | 3.5 | C |
| 58160314 | Rice with peas and carrots, fat added in cooking                                                           | 8000_Mixed | 41 | 35 | 6  | 1 | 3.5 | C |



|          |                                                                                                         |            |    |    |    |   |     |   |
|----------|---------------------------------------------------------------------------------------------------------|------------|----|----|----|---|-----|---|
| 58165000 | Rice, white, with vegetables, cheese and/or cream based sauce, NS as to fat                             | 8000_Mixed | 41 | 35 | 6  | 2 | 3.5 | C |
| 27315330 | Beef, rice, and vegetables including carrots, broccoli, and/or dark-green leafy; cheese sauce           | 8000_Mixed | 41 | 34 | 7  | 2 | 3.5 | C |
| 27330080 | Lamb or mutton, rice, and vegetables including carrots, broccoli, and/or dark-green leafy; gravy        | 8000_Mixed | 41 | 34 | 7  | 1 | 3.5 | C |
| 27540200 | Fajita-style chicken sandwich with cheese, on pita bread, with lettuce and tomato                       | 8000_Mixed | 41 | 34 | 7  | 3 | 3.5 | C |
| 32204010 | Scrambled egg sandwich                                                                                  | 8000_Mixed | 41 | 34 | 7  | 3 | 3.5 | C |
| 58101310 | Taco or tostada with beef, lettuce, tomato and salsa                                                    | 8000_Mixed | 41 | 34 | 7  | 3 | 3.5 | C |
| 58135120 | Chow fun noodles with vegetables, meatless                                                              | 8000_Mixed | 41 | 34 | 7  | 1 | 3.5 | B |
| 58163405 | Spanish rice, from restaurant                                                                           | 8000_Mixed | 41 | 34 | 7  | 1 | 3   | C |
| 71803010 | Potato chowder                                                                                          | 8000_Mixed | 41 | 34 | 7  | 2 | 3   | C |
| 75440170 | Vegetable sticks, breaded (including corn, carrots, and green beans)                                    | 8000_Mixed | 41 | 34 | 7  | 2 | 3   | C |
| 27220310 | Ham or pork and rice, no sauce                                                                          | 8000_Mixed | 41 | 33 | 8  | 1 | 3.5 | C |
| 27345450 | Chicken or turkey, rice, and vegetables excluding carrots, broccoli, and dark-green leafy; cheese sauce | 8000_Mixed | 41 | 33 | 8  | 2 | 3.5 | C |
| 41601120 | Bean soup with vegetables, rice, and pork                                                               | 8000_Mixed | 41 | 33 | 8  | 2 | 3.5 | B |
| 58100000 | Burrito, taco, or quesadilla with egg                                                                   | 8000_Mixed | 41 | 33 | 8  | 3 | 3   | D |
| 58147310 | Macaroni, creamed                                                                                       | 8000_Mixed | 41 | 33 | 8  | 1 | 3.5 | B |
| 58161300 | White rice with tomato sauce                                                                            | 8000_Mixed | 41 | 33 | 8  | 1 | 3   | C |
| 27360090 | Paella, NFS                                                                                             | 8000_Mixed | 41 | 32 | 9  | 2 | 3   | D |
| 58404500 | Matzo ball soup                                                                                         | 8000_Mixed | 41 | 32 | 9  | 3 | 3.5 | C |
| 27212050 | Beef and macaroni with cheese sauce                                                                     | 8000_Mixed | 41 | 31 | 10 | 1 | 3.5 | C |
| 27221100 | Stewed pig's feet, Puerto Rican style                                                                   | 8000_Mixed | 41 | 31 | 10 | 2 | 3.5 | C |
| 55703000 | Cake made with glutinous rice and dried beans                                                           | 8000_Mixed | 41 | 31 | 10 | 1 | 3   | D |
| 58131330 | Ravioli, meat-filled, with cream sauce                                                                  | 8000_Mixed | 41 | 31 | 10 | 1 | 3   | D |
| 27116350 | Stewed seasoned ground beef, Mexican style                                                              | 8000_Mixed | 41 | 30 | 11 | 1 | 3.5 | C |
| 27416200 | Beef, ground, with egg and onion                                                                        | 8000_Mixed | 41 | 28 | 13 | 1 | 2   | D |
| 14640030 | Cheese sandwich, American cheese, on whole wheat bread, with mayonnaise                                 | 8000_Mixed | 40 | 49 | -9 | 4 | 1.5 | E |
| 27564420 | Frankfurter or hot dog sandwich, meatless, plain, on bun                                                | 8000_Mixed | 40 | 47 | -7 | 4 | 4   | B |
| 58106234 | Pizza, cheese, from school lunch, medium crust                                                          | 8000_Mixed | 40 | 46 | -6 | 4 | 3.5 | D |
| 14640052 | Cheese sandwich, American cheese, on wheat bread, with butter                                           | 8000_Mixed | 40 | 45 | -5 | 4 | 1.5 | E |
| 58106235 | Pizza, cheese, from school lunch, thin crust                                                            | 8000_Mixed | 40 | 45 | -5 | 4 | 3.5 | D |
| 14640064 | Cheese sandwich, reduced fat American cheese, on wheat bread, with butter                               | 8000_Mixed | 40 | 44 | -4 | 4 | 1.5 | E |
| 14640066 | Cheese sandwich, reduced fat American cheese, on whole wheat bread, with butter                         | 8000_Mixed | 40 | 44 | -4 | 4 | 1.5 | E |
| 14640165 | Grilled cheese sandwich, reduced fat American cheese, on whole wheat bread                              | 8000_Mixed | 40 | 44 | -4 | 4 | 1.5 | E |
| 58106580 | Pizza with pepperoni, from school lunch, thick crust                                                    | 8000_Mixed | 40 | 44 | -4 | 4 | 3.5 | D |
| 72302020 | Broccoli soup, prepared with water, home recipe, canned, or ready-to-serve                              | 8000_Mixed | 40 | 44 | -4 | 4 | 3   | C |

|          |                                                                                                              |            |    |    |    |   |     |   |
|----------|--------------------------------------------------------------------------------------------------------------|------------|----|----|----|---|-----|---|
| 58110130 | Egg roll, with beef and/or pork                                                                              | 8000_Mixed | 40 | 42 | -2 | 4 | 3   | C |
| 14640058 | Cheese sandwich, Cheddar cheese, on wheat bread, with butter                                                 | 8000_Mixed | 40 | 41 | -1 | 3 | 1.5 | E |
| 14640060 | Cheese sandwich, Cheddar cheese, on whole wheat bread, with butter                                           | 8000_Mixed | 40 | 41 | -1 | 3 | 1.5 | E |
| 14640130 | Grilled cheese sandwich, Cheddar cheese, on wheat bread                                                      | 8000_Mixed | 40 | 41 | -1 | 3 | 1.5 | E |
| 14640135 | Grilled cheese sandwich, Cheddar cheese, on whole wheat bread                                                | 8000_Mixed | 40 | 41 | -1 | 3 | 1.5 | E |
| 27347220 | Chicken or turkey, stuffing, and vegetables including carrots, broccoli, and/or dark-green leafy; gravy      | 8000_Mixed | 40 | 40 | 0  | 3 | 3.5 | C |
| 42302010 | Peanut butter and jelly sandwich, NFS                                                                        | 8000_Mixed | 40 | 40 | 0  | 3 | 2   | D |
| 42302015 | Peanut butter and jelly sandwich, with regular peanut butter, regular jelly, on white bread                  | 8000_Mixed | 40 | 40 | 0  | 3 | 2   | D |
| 42303100 | Peanut butter and jelly sandwich, frozen commercial product without crusts                                   | 8000_Mixed | 40 | 40 | 0  | 3 | 2   | D |
| 58101200 | Flauta, NFS                                                                                                  | 8000_Mixed | 40 | 38 | 2  | 3 | 3.5 | C |
| 58109060 | Pizza, cheese and vegetables, whole wheat thick crust                                                        | 8000_Mixed | 40 | 38 | 2  | 3 | 3.5 | C |
| 75607060 | Mushroom soup, cream of, NS as to made with milk or water                                                    | 8000_Mixed | 40 | 38 | 2  | 3 | 3   | C |
| 58101730 | Taco or tostada with meat and beans                                                                          | 8000_Mixed | 40 | 37 | 3  | 3 | 3.5 | C |
| 58146391 | Pasta with cream sauce and added vegetables, restaurant                                                      | 8000_Mixed | 40 | 37 | 3  | 2 | 2.5 | D |
| 27420450 | Sausage and vegetables including carrots, broccoli, and/or dark-green leafy; no potatoes, tomato-based sauce | 8000_Mixed | 40 | 36 | 4  | 3 | 3   | C |
| 58100245 | Burrito with chicken, beans, and sour cream                                                                  | 8000_Mixed | 40 | 36 | 4  | 3 | 2   | D |
| 58101555 | Soft taco with fish                                                                                          | 8000_Mixed | 40 | 36 | 4  | 3 | 3   | D |
| 58101745 | Taco or tostada with meat, beans, and sour cream                                                             | 8000_Mixed | 40 | 36 | 4  | 3 | 3   | C |
| 58146421 | Pasta with cream sauce and poultry, restaurant                                                               | 8000_Mixed | 40 | 36 | 4  | 2 | 2.5 | D |
| 14710100 | Cheddar cheese soup, home recipe, canned or ready-to-serve                                                   | 8000_Mixed | 40 | 35 | 5  | 3 | 3   | C |
| 27510205 | Cheeseburger, 1 small patty, with condiments, on white bun                                                   | 8000_Mixed | 40 | 35 | 5  | 3 | 3   | D |
| 27515070 | Steak and cheese submarine sandwich, with fried peppers and onions, on roll                                  | 8000_Mixed | 40 | 35 | 5  | 3 | 3.5 | B |
| 58100120 | Burrito with meat and beans                                                                                  | 8000_Mixed | 40 | 35 | 5  | 3 | 3   | D |
| 58100140 | Burrito with meat, beans, and sour cream                                                                     | 8000_Mixed | 40 | 35 | 5  | 3 | 3   | D |
| 58100160 | Burrito with meat, beans, and rice                                                                           | 8000_Mixed | 40 | 35 | 5  | 3 | 3   | D |
| 58100260 | Burrito with chicken, beans, rice, and sour cream                                                            | 8000_Mixed | 40 | 35 | 5  | 3 | 3   | D |
| 27500200 | Wrap sandwich, filled with meat, poultry, or fish, vegetables, and cheese                                    | 8000_Mixed | 40 | 34 | 6  | 3 | 3   | D |
| 27510251 | Cheeseburger, 1 medium patty, with condiments, on white bun                                                  | 8000_Mixed | 40 | 34 | 6  | 3 | 3   | D |
| 27510720 | Pizzaburger (hamburger, cheese, sauce) on whole bun                                                          | 8000_Mixed | 40 | 34 | 6  | 3 | 3.5 | D |
| 32202040 | Egg, cheese, and beef on English Muffin                                                                      | 8000_Mixed | 40 | 34 | 6  | 3 | 2   | D |
| 58100165 | Burrito with meat, beans, rice, and sour cream                                                               | 8000_Mixed | 40 | 34 | 6  | 3 | 3   | D |
| 58101320 | Taco or tostada with meat                                                                                    | 8000_Mixed | 40 | 34 | 6  | 3 | 2.5 | D |
| 58122310 | Knish, potato                                                                                                | 8000_Mixed | 40 | 34 | 6  | 2 | 2.5 | D |
| 58200200 | Wrap sandwich, filled with vegetables and rice                                                               | 8000_Mixed | 40 | 34 | 6  | 2 | 3.5 | C |
| 58122330 | Knish, meat                                                                                                  | 8000_Mixed | 40 | 33 | 7  | 2 | 2   | D |
| 58160320 | Rice with tomatoes, NS as to fat added in cooking                                                            | 8000_Mixed | 40 | 33 | 7  | 2 | 3.5 | C |

|          |                                                                                                           |            |    |    |    |   |     |   |
|----------|-----------------------------------------------------------------------------------------------------------|------------|----|----|----|---|-----|---|
| 58160324 | Rice with tomatoes, fat added in cooking                                                                  | 8000_Mixed | 40 | 33 | 7  | 2 | 3.5 | C |
| 58163400 | Flavored rice and pasta mixture, reduced sodium                                                           | 8000_Mixed | 40 | 33 | 7  | 2 | 3.5 | B |
| 27330050 | Lamb or mutton, rice, and vegetables excluding carrots, broccoli, and dark-green leafy; gravy             | 8000_Mixed | 40 | 32 | 8  | 1 | 3.5 | C |
| 58100230 | Burrito with chicken and cheese                                                                           | 8000_Mixed | 40 | 32 | 8  | 3 | 2   | D |
| 58105100 | Pupusa, cheese-filled                                                                                     | 8000_Mixed | 40 | 32 | 8  | 1 | 2.5 | D |
| 58120120 | Crepe, filled with meat, poultry, or seafood, no sauce                                                    | 8000_Mixed | 40 | 32 | 8  | 2 | 3   | D |
| 58133110 | Manicotti, cheese-filled, no sauce                                                                        | 8000_Mixed | 40 | 32 | 8  | 2 | 3   | D |
| 58160300 | Rice with peas, NS as to fat added in cooking                                                             | 8000_Mixed | 40 | 32 | 8  | 1 | 3.5 | C |
| 27213120 | Porcupine balls with tomato-based sauce                                                                   | 8000_Mixed | 40 | 31 | 9  | 1 | 3.5 | C |
| 27320090 | Sausage, noodles, and vegetables including carrots, broccoli, and/or dark-green leafy; tomato-based sauce | 8000_Mixed | 40 | 31 | 9  | 2 | 3.5 | C |
| 58103110 | Tamale with meat and/or poultry                                                                           | 8000_Mixed | 40 | 31 | 9  | 1 | 3   | D |
| 58134110 | Stuffed shells, cheese-filled, no sauce                                                                   | 8000_Mixed | 40 | 31 | 9  | 2 | 3   | D |
| 58146442 | Pasta with cream sauce and seafood, home recipe                                                           | 8000_Mixed | 40 | 31 | 9  | 2 | 3   | C |
| 58160620 | Rice, white, with dark green vegetables and tomatoes and/or tomato-based sauce, no added fat              | 8000_Mixed | 40 | 31 | 9  | 1 | 3.5 | C |
| 27130010 | Lamb or mutton with gravy                                                                                 | 8000_Mixed | 40 | 30 | 10 | 1 | 3.5 | D |
| 27233000 | Lamb or mutton and noodles with gravy                                                                     | 8000_Mixed | 40 | 30 | 10 | 1 | 3.5 | C |
| 27243700 | Chicken in cheese sauce with Spanish rice                                                                 | 8000_Mixed | 40 | 30 | 10 | 1 | 3.5 | C |
| 58100240 | Burrito with chicken, NFS                                                                                 | 8000_Mixed | 40 | 30 | 10 | 3 | 4   | C |
| 14640018 | Cheese sandwich, reduced fat American cheese, on whole wheat bread, no spread                             | 8000_Mixed | 39 | 43 | -4 | 4 | 2   | D |
| 14640160 | Grilled cheese sandwich, reduced fat American cheese, on wheat bread                                      | 8000_Mixed | 39 | 43 | -4 | 4 | 1.5 | E |
| 58146693 | Pasta, whole grain, with cream sauce, and added vegetables, ready-to-heat                                 | 8000_Mixed | 39 | 43 | -4 | 4 | 3   | C |
| 58146713 | Pasta, whole grain, with cream sauce, meat, and added vegetables, ready-to-heat                           | 8000_Mixed | 39 | 43 | -4 | 4 | 3.5 | C |
| 75654020 | Vegetarian vegetable soup, undiluted                                                                      | 8000_Mixed | 39 | 43 | -4 | 4 | 3   | C |
| 14640054 | Cheese sandwich, American cheese, on whole wheat bread, with butter                                       | 8000_Mixed | 39 | 42 | -3 | 4 | 1.5 | E |
| 58106634 | Pizza, with meat other than pepperoni, from school lunch, medium crust                                    | 8000_Mixed | 39 | 42 | -3 | 4 | 3.5 | D |
| 58106635 | Pizza, with meat other than pepperoni, from school lunch, thin crust                                      | 8000_Mixed | 39 | 42 | -3 | 4 | 3.5 | D |
| 58127110 | Vegetables in pastry                                                                                      | 8000_Mixed | 39 | 42 | -3 | 4 | 3.5 | C |
| 75649040 | Vegetable soup, reduced sodium, canned, ready to serve                                                    | 8000_Mixed | 39 | 42 | -3 | 4 | 3.5 | A |
| 28141650 | Chicken and vegetables au gratin with rice, diet frozen entree                                            | 8000_Mixed | 39 | 41 | -2 | 4 | 3.5 | C |
| 58304220 | Rigatoni with meat sauce and cheese, diet frozen meal                                                     | 8000_Mixed | 39 | 41 | -2 | 4 | 3.5 | B |
| 28355110 | Clam chowder, New England, NS as to prepared with water or milk                                           | 8000_Mixed | 39 | 40 | -1 | 4 | 3.5 | C |
| 42302055 | Peanut butter and jelly sandwich, with reduced fat peanut butter, regular jelly, on white bread           | 8000_Mixed | 39 | 40 | -1 | 3 | 2.5 | D |
| 71801040 | Potato soup, instant, made from dry mix                                                                   | 8000_Mixed | 39 | 40 | -1 | 4 | 3.5 | A |
| 28110270 | Sirloin beef, with gravy, potatoes, vegetable, frozen meal                                                | 8000_Mixed | 39 | 39 | 0  | 4 | 4   | B |

|          |                                                                                            |            |    |    |   |   |     |   |
|----------|--------------------------------------------------------------------------------------------|------------|----|----|---|---|-----|---|
| 28141300 | Chicken with rice and vegetable, reduced fat and sodium (diet frozen meal)                 | 8000_Mixed | 39 | 39 | 0 | 4 | 4   | A |
| 75652020 | Vegetable beef soup, canned, undiluted                                                     | 8000_Mixed | 39 | 39 | 0 | 4 | 3   | C |
| 27540111 | Sliced chicken sandwich, with cheese and spread                                            | 8000_Mixed | 39 | 38 | 1 | 3 | 3.5 | D |
| 58104260 | Gordita, sope, or chalupa with beans                                                       | 8000_Mixed | 39 | 38 | 1 | 3 | 3.5 | C |
| 58100300 | Burrito with beans and rice, meatless                                                      | 8000_Mixed | 39 | 37 | 2 | 3 | 3   | D |
| 58101230 | Flauta with beef                                                                           | 8000_Mixed | 39 | 37 | 2 | 3 | 3.5 | C |
| 58148550 | Macaroni or pasta salad with meat                                                          | 8000_Mixed | 39 | 37 | 2 | 2 | 3.5 | C |
| 75607010 | Mushroom soup, cream of, prepared with milk                                                | 8000_Mixed | 39 | 37 | 2 | 3 | 3   | C |
| 58101725 | Taco or tostada with beans and sour cream                                                  | 8000_Mixed | 39 | 36 | 3 | 3 | 3.5 | C |
| 58100210 | Burrito with chicken and beans                                                             | 8000_Mixed | 39 | 35 | 4 | 3 | 2.5 | B |
| 58100255 | Burrito with chicken, beans, and rice                                                      | 8000_Mixed | 39 | 35 | 4 | 3 | 3.5 | D |
| 58101750 | Taco or tostada with chicken, beans, and sour cream                                        | 8000_Mixed | 39 | 35 | 4 | 3 | 3   | C |
| 58101520 | Taco or tostada with chicken                                                               | 8000_Mixed | 39 | 34 | 5 | 3 | 3   | D |
| 58101525 | Taco or tostada with chicken and sour cream                                                | 8000_Mixed | 39 | 34 | 5 | 3 | 3   | D |
| 58101630 | Soft taco with meat, beans, and sour cream                                                 | 8000_Mixed | 39 | 34 | 5 | 3 | 3   | C |
| 58108000 | Calzone, with cheese, meatless                                                             | 8000_Mixed | 39 | 34 | 5 | 2 | 1.5 | E |
| 58146401 | Pasta with cream sauce and meat, restaurant                                                | 8000_Mixed | 39 | 34 | 5 | 2 | 2.5 | D |
| 27320130 | Sausage, potatoes, and vegetables excluding carrots, broccoli, and dark-green leafy; gravy | 8000_Mixed | 39 | 33 | 6 | 3 | 3.5 | C |
| 28154010 | Shrimp and vegetables in sauce with noodles, diet frozen meal                              | 8000_Mixed | 39 | 33 | 6 | 4 | 3.5 | C |
| 58100235 | Burrito with chicken and sour cream                                                        | 8000_Mixed | 39 | 33 | 6 | 3 | 2   | D |
| 58101325 | Taco or tostada with meat and sour cream                                                   | 8000_Mixed | 39 | 33 | 6 | 3 | 2   | D |
| 58165060 | Rice, white, with vegetables, soy-based sauce, NS as to fat                                | 8000_Mixed | 39 | 33 | 6 | 1 | 3   | C |
| 58165080 | Rice, white, with vegetables, soy-based sauce, fat added                                   | 8000_Mixed | 39 | 33 | 6 | 1 | 3   | C |
| 27120030 | Ham or pork with barbecue sauce                                                            | 8000_Mixed | 39 | 32 | 7 | 2 | 3.5 | D |
| 27213400 | Beef and rice with mushroom sauce                                                          | 8000_Mixed | 39 | 32 | 7 | 2 | 3.5 | C |
| 27315340 | Beef, rice, and vegetables excluding carrots, broccoli, and dark-green leafy; cheese sauce | 8000_Mixed | 39 | 32 | 7 | 2 | 3.5 | C |
| 27515010 | Steak sandwich, plain, on roll                                                             | 8000_Mixed | 39 | 32 | 7 | 2 | 4   | B |
| 27135150 | Veal cordon bleu                                                                           | 8000_Mixed | 39 | 31 | 8 | 2 | 2   | D |
| 27213000 | Beef and rice, no sauce                                                                    | 8000_Mixed | 39 | 31 | 8 | 1 | 3.5 | B |
| 27218310 | Stewed corned beef, Puerto Rican style                                                     | 8000_Mixed | 39 | 31 | 8 | 2 | 3.5 | C |
| 58104810 | Taquitos                                                                                   | 8000_Mixed | 39 | 31 | 8 | 2 | 3.5 | D |
| 58160290 | Rice with corn, NS as to fat added in cooking                                              | 8000_Mixed | 39 | 31 | 8 | 1 | 3   | C |
| 58160294 | Rice with corn, fat added in cooking                                                       | 8000_Mixed | 39 | 31 | 8 | 1 | 3   | C |
| 58160470 | Rice, white, with carrots, no added fat                                                    | 8000_Mixed | 39 | 31 | 8 | 1 | 3.5 | C |
| 58161710 | Rice croquette                                                                             | 8000_Mixed | 39 | 31 | 8 | 2 | 3   | C |
| 58404100 | Rice and potato soup, Puerto Rican style                                                   | 8000_Mixed | 39 | 31 | 8 | 1 | 3   | C |
| 27212300 | Beef and noodles with cream or white sauce                                                 | 8000_Mixed | 39 | 30 | 9 | 1 | 3.5 | C |
| 27230010 | Lamb or mutton loaf                                                                        | 8000_Mixed | 39 | 30 | 9 | 1 | 3   | D |

|          |                                                                                                      |            |    |    |    |   |     |   |
|----------|------------------------------------------------------------------------------------------------------|------------|----|----|----|---|-----|---|
| 58160590 | Rice, white, with carrots and tomatoes and/or tomato-based sauce, no added fat                       | 8000_Mixed | 39 | 30 | 9  | 1 | 3.5 | C |
| 58160650 | Rice, white, with carrots and dark green vegetables, no added fat                                    | 8000_Mixed | 39 | 30 | 9  | 1 | 3.5 | B |
| 58105110 | Pupusa, meat-filled                                                                                  | 8000_Mixed | 39 | 29 | 10 | 1 | 3.5 | C |
| 58160302 | Rice with peas, fat not added in cooking                                                             | 8000_Mixed | 39 | 29 | 10 | 1 | 3.5 | C |
| 27113300 | Swedish meatballs with cream or white sauce                                                          | 8000_Mixed | 39 | 28 | 11 | 1 | 3   | D |
| 27118140 | Stuffed pot roast, Puerto Rican style, NFS                                                           | 8000_Mixed | 39 | 28 | 11 | 2 | 1.5 | D |
| 27160100 | Meatballs, NS as to type of meat, with sauce                                                         | 8000_Mixed | 39 | 26 | 13 | 1 | 2   | D |
| 58131310 | Ravioli, meat-filled, no sauce                                                                       | 8000_Mixed | 39 | 26 | 13 | 1 | 3   | D |
| 58150510 | Rice, fried, with shrimp                                                                             | 8000_Mixed | 39 | 25 | 14 | 1 | 3.5 | C |
| 14640016 | Cheese sandwich, reduced fat American cheese, on wheat bread, no spread                              | 8000_Mixed | 38 | 42 | -4 | 4 | 2   | D |
| 14640110 | Grilled cheese sandwich, American cheese, on wheat bread                                             | 8000_Mixed | 38 | 42 | -4 | 4 | 1.5 | E |
| 58127150 | Vegetables and cheese in pastry                                                                      | 8000_Mixed | 38 | 42 | -4 | 4 | 3   | D |
| 58110170 | Egg roll, with chicken or turkey                                                                     | 8000_Mixed | 38 | 41 | -3 | 4 | 3.5 | C |
| 58301020 | Lasagna with cheese and sauce, diet frozen meal                                                      | 8000_Mixed | 38 | 41 | -3 | 4 | 3.5 | C |
| 58106636 | Pizza, with meat other than pepperoni, from school lunch, thick crust                                | 8000_Mixed | 38 | 40 | -2 | 4 | 3.5 | D |
| 27341000 | Chicken or turkey, potatoes, corn, and cheese, with gravy                                            | 8000_Mixed | 38 | 38 | 0  | 4 | 3.5 | C |
| 28143010 | Chicken and vegetable entree with rice, Oriental (frozen meal)                                       | 8000_Mixed | 38 | 38 | 0  | 4 | 4   | B |
| 58101720 | Taco or tostada with beans                                                                           | 8000_Mixed | 38 | 38 | 0  | 4 | 3.5 | C |
| 27111430 | Chili con carne, NS as to beans, with cheese                                                         | 8000_Mixed | 38 | 37 | 1  | 4 | 3.5 | C |
| 27111440 | Chili con carne with beans and cheese                                                                | 8000_Mixed | 38 | 37 | 1  | 4 | 3.5 | C |
| 27347230 | Chicken or turkey, stuffing, and vegetables excluding carrots, broccoli, and dark-green leafy; gravy | 8000_Mixed | 38 | 37 | 1  | 3 | 3.5 | C |
| 58100310 | Burrito with beans, meatless                                                                         | 8000_Mixed | 38 | 37 | 1  | 3 | 3   | C |
| 28150510 | Fish in lemon-butter sauce with starch item, vegetable, frozen meal                                  | 8000_Mixed | 38 | 36 | 2  | 4 | 3   | C |
| 58101735 | Taco or tostada with chicken and beans                                                               | 8000_Mixed | 38 | 36 | 2  | 3 | 3.5 | C |
| 58104160 | Nachos with chili                                                                                    | 8000_Mixed | 38 | 36 | 2  | 3 | 2.5 | D |
| 58109020 | Pizza, cheese, whole wheat thick crust                                                               | 8000_Mixed | 38 | 36 | 2  | 3 | 3.5 | D |
| 58128220 | Dressing with chicken or turkey and vegetables                                                       | 8000_Mixed | 38 | 36 | 2  | 3 | 3   | C |
| 58304400 | Linguini with vegetables and seafood in white wine sauce, diet frozen meal                           | 8000_Mixed | 38 | 36 | 2  | 4 | 3.5 | C |
| 58104290 | Gordita, sope, or chalupa with meat                                                                  | 8000_Mixed | 38 | 35 | 3  | 3 | 3   | D |
| 27515040 | Steak and cheese submarine sandwich, plain, on roll                                                  | 8000_Mixed | 38 | 34 | 4  | 3 | 3.5 | D |
| 58101635 | Soft taco with chicken, beans, and sour cream                                                        | 8000_Mixed | 38 | 34 | 4  | 3 | 3.5 | C |
| 58104280 | Gordita, sope, or chalupa with meat and sour cream                                                   | 8000_Mixed | 38 | 34 | 4  | 3 | 3   | D |
| 58104320 | Gordita, sope, or chalupa with chicken and sour cream                                                | 8000_Mixed | 38 | 34 | 4  | 3 | 3   | D |
| 58146381 | Pasta with cream sauce, restaurant                                                                   | 8000_Mixed | 38 | 34 | 4  | 2 | 2   | D |
| 27510341 | Bacon cheeseburger, 1 medium patty, with condiments, on white bun                                    | 8000_Mixed | 38 | 33 | 5  | 3 | 2   | D |
| 27513050 | Roast beef sandwich with cheese                                                                      | 8000_Mixed | 38 | 33 | 5  | 2 | 1.5 | D |
| 27550405 | Fish sandwich, fried, on white bun, with cheese                                                      | 8000_Mixed | 38 | 33 | 5  | 3 | 3   | D |

|          |                                                                                                                 |            |    |    |    |   |     |   |
|----------|-----------------------------------------------------------------------------------------------------------------|------------|----|----|----|---|-----|---|
| 58104600 | Chimichanga with beef and rice                                                                                  | 8000_Mixed | 38 | 33 | 5  | 3 | 3.5 | C |
| 27550400 | Fish sandwich, fried, on white bun                                                                              | 8000_Mixed | 38 | 32 | 6  | 3 | 3.5 | C |
| 58100135 | Burrito with meat and sour cream                                                                                | 8000_Mixed | 38 | 32 | 6  | 3 | 2   | D |
| 58100150 | Burrito with beef and potato, no beans                                                                          | 8000_Mixed | 38 | 32 | 6  | 2 | 3.5 | C |
| 58109210 | Breakfast pizza with egg                                                                                        | 8000_Mixed | 38 | 32 | 6  | 3 | 2   | D |
| 27500300 | Wrap sandwich, NFS                                                                                              | 8000_Mixed | 38 | 31 | 7  | 3 | 3.5 | C |
| 27510641 | Hamburger, 1 medium patty, with condiments, on white bun                                                        | 8000_Mixed | 38 | 31 | 7  | 2 | 3.5 | D |
| 27550000 | Fish sandwich, fried, from fast food                                                                            | 8000_Mixed | 38 | 31 | 7  | 3 | 3.5 | C |
| 58122320 | Knish, cheese                                                                                                   | 8000_Mixed | 38 | 31 | 7  | 2 | 3   | D |
| 58145170 | Macaroni or noodles with cheese and egg                                                                         | 8000_Mixed | 38 | 31 | 7  | 3 | 3   | C |
| 27116200 | Beef with barbecue sauce                                                                                        | 8000_Mixed | 38 | 30 | 8  | 2 | 3.5 | C |
| 27320080 | Sausage, noodles, and vegetables excluding carrots, broccoli, and dark-green leafy; tomato-based sauce          | 8000_Mixed | 38 | 30 | 8  | 2 | 3.5 | C |
| 58100020 | Burrito, taco, or quesadilla with egg, beans, and breakfast meat                                                | 8000_Mixed | 38 | 30 | 8  | 3 | 3   | D |
| 58150520 | Dukboki or Tteokbokki, Korean                                                                                   | 8000_Mixed | 38 | 30 | 8  | 2 | 3.5 | B |
| 58165010 | Rice, white, with vegetables, cheese and/or cream based sauce, no added fat                                     | 8000_Mixed | 38 | 30 | 8  | 2 | 3.5 | C |
| 27213420 | Porcupine balls with mushroom sauce                                                                             | 8000_Mixed | 38 | 29 | 9  | 1 | 3   | C |
| 58146130 | Pasta with carbonara sauce                                                                                      | 8000_Mixed | 38 | 29 | 9  | 2 | 3   | C |
| 58155110 | Rice with chicken, Puerto Rican style                                                                           | 8000_Mixed | 38 | 29 | 9  | 1 | 2   | D |
| 58160530 | Rice, white, with tomatoes and/or tomato-based sauce, no added fat                                              | 8000_Mixed | 38 | 29 | 9  | 1 | 3.5 | C |
| 58160680 | Rice, white, with carrots, dark green vegetables, and tomatoes and/or tomato-based sauce, no added fat          | 8000_Mixed | 38 | 29 | 9  | 1 | 3.5 | C |
| 58163420 | Spanish rice, no added fat                                                                                      | 8000_Mixed | 38 | 29 | 9  | 1 | 3.5 | C |
| 58103310 | Tamale casserole with meat                                                                                      | 8000_Mixed | 38 | 28 | 10 | 1 | 3.5 | C |
| 58160202 | Rice with vegetables (including carrots, broccoli, and/or dark-green leafy), no sauce, fat not added in cooking | 8000_Mixed | 38 | 28 | 10 | 1 | 3.5 | C |
| 27540296 | Buffalo chicken submarine sandwich with cheese                                                                  | 8000_Mixed | 37 | 42 | -5 | 4 | 3.5 | C |
| 14640115 | Grilled cheese sandwich, American cheese, on whole wheat bread                                                  | 8000_Mixed | 37 | 41 | -4 | 4 | 1.5 | E |
| 28145000 | Turkey dinner, NFS, frozen meal                                                                                 | 8000_Mixed | 37 | 41 | -4 | 4 | 3.5 | C |
| 28145210 | Turkey with gravy, dressing, potatoes, vegetable, frozen meal                                                   | 8000_Mixed | 37 | 41 | -4 | 4 | 3.5 | C |
| 58146303 | Pasta with tomato-based sauce, and added vegetables, ready-to-heat                                              | 8000_Mixed | 37 | 41 | -4 | 4 | 3.5 | C |
| 58146723 | Pasta, whole grain, with cream sauce and poultry, ready-to-heat                                                 | 8000_Mixed | 37 | 41 | -4 | 4 | 3   | C |
| 14640004 | Cheese sandwich, American cheese, on wheat bread, no spread                                                     | 8000_Mixed | 37 | 40 | -3 | 4 | 2   | D |
| 14640006 | Cheese sandwich, American cheese, on whole wheat bread, no spread                                               | 8000_Mixed | 37 | 40 | -3 | 4 | 2   | D |
| 41601010 | Bean soup, NFS                                                                                                  | 8000_Mixed | 37 | 40 | -3 | 4 | 3.5 | B |
| 41601020 | Bean with bacon or ham soup, canned or ready-to-serve                                                           | 8000_Mixed | 37 | 40 | -3 | 4 | 3.5 | B |
| 58301050 | Lasagna with cheese and meat sauce, diet frozen meal                                                            | 8000_Mixed | 37 | 40 | -3 | 4 | 4   | B |
| 28140730 | Chicken patty, breaded, with tomato sauce and cheese, fettuccine alfredo, vegetable, frozen meal                | 8000_Mixed | 37 | 39 | -2 | 4 | 4   | B |

|          |                                                                                                              |            |    |    |    |   |     |   |
|----------|--------------------------------------------------------------------------------------------------------------|------------|----|----|----|---|-----|---|
| 58305250 | Pasta with vegetable and cheese sauce, diet frozen meal                                                      | 8000_Mixed | 37 | 39 | -2 | 4 | 3.5 | B |
| 28143110 | Chicken cacciatore with noodles, diet frozen meal                                                            | 8000_Mixed | 37 | 38 | -1 | 4 | 3.5 | B |
| 28110250 | Sirloin tips, with gravy, potatoes, vegetable, frozen meal                                                   | 8000_Mixed | 37 | 37 | 0  | 4 | 4   | B |
| 28160710 | Stuffed cabbage, with meat and tomato sauce, diet frozen meal                                                | 8000_Mixed | 37 | 37 | 0  | 4 | 3.5 | A |
| 28340310 | Chicken or turkey gumbo soup, home recipe, canned or ready-to-serve                                          | 8000_Mixed | 37 | 36 | 1  | 4 | 3   | C |
| 58101610 | Soft taco with beans                                                                                         | 8000_Mixed | 37 | 36 | 1  | 4 | 3.5 | C |
| 75405010 | Beets with Harvard sauce                                                                                     | 8000_Mixed | 37 | 36 | 1  | 3 | 3.5 | C |
| 75651020 | Vegetable beef soup, canned, prepared with water, or ready-to-serve                                          | 8000_Mixed | 37 | 36 | 1  | 4 | 3.5 | C |
| 75651030 | Vegetable beef noodle soup, prepared with water                                                              | 8000_Mixed | 37 | 36 | 1  | 4 | 3.5 | C |
| 75651080 | Vegetable beef soup with rice, canned, prepared with water or ready-to-serve                                 | 8000_Mixed | 37 | 36 | 1  | 4 | 3.5 | C |
| 58101615 | Soft taco with beans and sour cream                                                                          | 8000_Mixed | 37 | 35 | 2  | 3 | 3   | C |
| 58104340 | Gordita, sope, or chalupa with chicken                                                                       | 8000_Mixed | 37 | 35 | 2  | 3 | 3   | D |
| 75608100 | Onion soup, French                                                                                           | 8000_Mixed | 37 | 35 | 2  | 3 | 3   | C |
| 58101620 | Soft taco with meat and beans                                                                                | 8000_Mixed | 37 | 34 | 3  | 3 | 3   | D |
| 58107212 | White pizza, cheese, with vegetables, thin crust                                                             | 8000_Mixed | 37 | 34 | 3  | 3 | 3   | D |
| 27550100 | Fish sandwich, fried, from fast food, with cheese                                                            | 8000_Mixed | 37 | 33 | 4  | 3 | 2   | D |
| 58100200 | Burrito with chicken                                                                                         | 8000_Mixed | 37 | 33 | 4  | 3 | 2   | D |
| 58101345 | Soft taco with meat                                                                                          | 8000_Mixed | 37 | 33 | 4  | 3 | 2.5 | D |
| 58107220 | White pizza, thin crust                                                                                      | 8000_Mixed | 37 | 33 | 4  | 2 | 1.5 | D |
| 27510585 | Hamburger, 1 small patty, with condiments, on white bun                                                      | 8000_Mixed | 37 | 32 | 5  | 3 | 3.5 | D |
| 27317010 | Beef pot pie                                                                                                 | 8000_Mixed | 37 | 31 | 6  | 2 | 3   | C |
| 58100100 | Burrito with meat                                                                                            | 8000_Mixed | 37 | 31 | 6  | 3 | 2   | D |
| 58101742 | Soft taco with egg, potato, cheese, tomato and/or salsa                                                      | 8000_Mixed | 37 | 31 | 6  | 3 | 3   | C |
| 58107030 | Pizza, no cheese, NS as to type of crust                                                                     | 8000_Mixed | 37 | 31 | 6  | 1 | 3.5 | C |
| 58107060 | Pizza, no cheese, regular crust                                                                              | 8000_Mixed | 37 | 31 | 6  | 1 | 3.5 | C |
| 27515000 | Steak submarine sandwich with lettuce and tomato                                                             | 8000_Mixed | 37 | 30 | 7  | 3 | 4   | A |
| 58109000 | Italian pie, meatless                                                                                        | 8000_Mixed | 37 | 30 | 7  | 2 | 2   | D |
| 58146432 | Pasta with cream sauce, poultry, and added vegetables, home recipe                                           | 8000_Mixed | 37 | 30 | 7  | 2 | 3.5 | C |
| 27213200 | Beef and rice with gravy                                                                                     | 8000_Mixed | 37 | 29 | 8  | 2 | 3.5 | C |
| 58105105 | Pupusa, bean-filled                                                                                          | 8000_Mixed | 37 | 29 | 8  | 2 | 3.5 | C |
| 58116130 | Empanada, Mexican turnover, filled with chicken and vegetables                                               | 8000_Mixed | 37 | 29 | 8  | 2 | 3   | D |
| 58116120 | Empanada, Mexican turnover, filled with meat and vegetables                                                  | 8000_Mixed | 37 | 28 | 9  | 1 | 2.5 | D |
| 58160500 | Rice, white, with peas and carrots, no added fat                                                             | 8000_Mixed | 37 | 28 | 9  | 1 | 3.5 | B |
| 27520140 | Bacon and egg sandwich                                                                                       | 8000_Mixed | 37 | 27 | 10 | 3 | 3   | D |
| 58157320 | Congee, with vegetables                                                                                      | 8000_Mixed | 37 | 27 | 10 | 1 | 3.5 | B |
| 58160207 | Rice with vegetables (excluding carrots, broccoli, and dark-green leafy), no sauce, fat not added in cooking | 8000_Mixed | 37 | 27 | 10 | 1 | 3.5 | C |
| 58131510 | Ravioli, cheese-filled, no sauce                                                                             | 8000_Mixed | 37 | 26 | 11 | 2 | 2.5 | D |

|          |                                                                                                            |            |    |    |    |   |     |   |
|----------|------------------------------------------------------------------------------------------------------------|------------|----|----|----|---|-----|---|
| 58146223 | Pasta with tomato-based sauce, ready-to-heat                                                               | 8000_Mixed | 36 | 41 | -5 | 4 | 3.5 | C |
| 28160650 | Stuffed green pepper, frozen meal                                                                          | 8000_Mixed | 36 | 40 | -4 | 4 | 3.5 | C |
| 58110110 | Egg roll, meatless                                                                                         | 8000_Mixed | 36 | 40 | -4 | 4 | 3   | C |
| 58110120 | Egg roll, with shrimp                                                                                      | 8000_Mixed | 36 | 40 | -4 | 4 | 3   | C |
| 58130310 | Lasagna, meatless                                                                                          | 8000_Mixed | 36 | 40 | -4 | 4 | 3.5 | C |
| 58146353 | Pasta with tomato-based sauce, poultry, and added vegetables, ready-to-heat                                | 8000_Mixed | 36 | 40 | -4 | 4 | 3.5 | B |
| 58106820 | Pizza with beans and vegetables, thin crust                                                                | 8000_Mixed | 36 | 39 | -3 | 4 | 3.5 | C |
| 58146343 | Pasta with tomato-based sauce and poultry, ready-to-heat                                                   | 8000_Mixed | 36 | 39 | -3 | 4 | 3.5 | C |
| 28110510 | Beef, sliced, with gravy, potatoes, vegetable, frozen meal                                                 | 8000_Mixed | 36 | 38 | -2 | 4 | 3.5 | C |
| 75414020 | Mushrooms, stuffed                                                                                         | 8000_Mixed | 36 | 38 | -2 | 4 | 4   | C |
| 28140720 | Chicken patty, or nuggets, boneless, breaded, potatoes, vegetable, frozen meal                             | 8000_Mixed | 36 | 37 | -1 | 4 | 3.5 | B |
| 58111120 | Wonton, fried, meatless                                                                                    | 8000_Mixed | 36 | 37 | -1 | 4 | 3   | C |
| 58307010 | Beef and pork cannelloni (diet frozen meal)                                                                | 8000_Mixed | 36 | 37 | -1 | 4 | 3.5 | B |
| 28110150 | Beef with vegetable, diet frozen meal                                                                      | 8000_Mixed | 36 | 36 | 0  | 4 | 3.5 | B |
| 27220050 | Ham or pork with stuffing                                                                                  | 8000_Mixed | 36 | 35 | 1  | 3 | 3.5 | C |
| 28143050 | Chicken chow mein with rice, reduced fat and sodium (diet frozen meal)                                     | 8000_Mixed | 36 | 35 | 1  | 4 | 4   | B |
| 28160660 | Stuffed green pepper (diet frozen meal)                                                                    | 8000_Mixed | 36 | 35 | 1  | 4 | 3.5 | C |
| 27570310 | Hors d'oeuvres, with spread                                                                                | 8000_Mixed | 36 | 34 | 2  | 4 | 3.5 | C |
| 58101625 | Soft taco with chicken and beans                                                                           | 8000_Mixed | 36 | 34 | 2  | 3 | 3.5 | C |
| 74203010 | Tomatoes, scalloped                                                                                        | 8000_Mixed | 36 | 33 | 3  | 3 | 4   | A |
| 58101450 | Soft taco with chicken                                                                                     | 8000_Mixed | 36 | 32 | 4  | 3 | 3   | D |
| 27420460 | Sausage and vegetables, excluding carrots, broccoli, and dark-green leafy; no potatoes, tomato-based sauce | 8000_Mixed | 36 | 31 | 5  | 3 | 3   | C |
| 58101350 | Soft taco with meat and sour cream                                                                         | 8000_Mixed | 36 | 31 | 5  | 3 | 3   | D |
| 58101460 | Soft taco with chicken and sour cream                                                                      | 8000_Mixed | 36 | 31 | 5  | 3 | 3   | D |
| 58145110 | Macaroni or noodles with cheese                                                                            | 8000_Mixed | 36 | 31 | 5  | 2 | 3   | D |
| 58106520 | Pizza with meat, thin crust                                                                                | 8000_Mixed | 36 | 30 | 6  | 2 | 2   | D |
| 27160010 | Meat with barbecue sauce, NS as to type of meat                                                            | 8000_Mixed | 36 | 28 | 8  | 2 | 3.5 | D |
| 58146412 | Pasta with cream sauce, meat, and added vegetables, home recipe                                            | 8000_Mixed | 36 | 28 | 8  | 2 | 3.5 | C |
| 58164110 | Rice with raisins                                                                                          | 8000_Mixed | 36 | 28 | 8  | 1 | 3   | C |
| 58151120 | Sushi, with vegetables, no seafood (no fish or shellfish)                                                  | 8000_Mixed | 36 | 27 | 9  | 1 | 3.5 | C |
| 58151140 | Sushi, with vegetables, rolled in seaweed                                                                  | 8000_Mixed | 36 | 27 | 9  | 1 | 3.5 | C |
| 58126000 | Turnover filled with ground beef and cabbage                                                               | 8000_Mixed | 36 | 26 | 10 | 1 | 3.5 | C |
| 58134660 | Tortellini, cheese-filled, with cream sauce                                                                | 8000_Mixed | 36 | 26 | 10 | 2 | 2.5 | D |
| 58160440 | Rice, white, with peas, no added fat                                                                       | 8000_Mixed | 36 | 26 | 10 | 1 | 3.5 | B |
| 27213600 | Beef and rice with cheese sauce                                                                            | 8000_Mixed | 36 | 25 | 11 | 1 | 3.5 | C |
| 27540295 | Buffalo chicken submarine sandwich                                                                         | 8000_Mixed | 35 | 40 | -5 | 4 | 3.5 | B |
| 58104120 | Nachos with cheese                                                                                         | 8000_Mixed | 35 | 40 | -5 | 4 | 3   | C |



|          |                                                                              |            |    |    |    |   |     |   |
|----------|------------------------------------------------------------------------------|------------|----|----|----|---|-----|---|
| 28141250 | Chicken with rice and vegetable, diet frozen meal                            | 8000_Mixed | 35 | 38 | -3 | 4 | 4   | B |
| 58306050 | Cheese enchilada with beans and rice (frozen meal)                           | 8000_Mixed | 35 | 37 | -2 | 4 | 3   | C |
| 28143080 | Chicken with noodles and cheese sauce, diet frozen meal                      | 8000_Mixed | 35 | 36 | -1 | 4 | 4   | A |
| 28340180 | Chicken or turkey broth, less or reduced sodium, canned or ready-to-serve    | 8000_Mixed | 35 | 36 | -1 | 4 | 3.5 | B |
| 58104520 | Chimichanga, meatless                                                        | 8000_Mixed | 35 | 36 | -1 | 3 | 3.5 | C |
| 58302030 | Macaroni with veal, cheese, and sauce (diet frozen meal)                     | 8000_Mixed | 35 | 36 | -1 | 4 | 4   | B |
| 58302050 | Beef and noodles with meat sauce and cheese, diet frozen meal                | 8000_Mixed | 35 | 36 | -1 | 4 | 3.5 | C |
| 28340630 | Chicken or turkey vegetable soup with rice, stew type, chunky style          | 8000_Mixed | 35 | 35 | 0  | 4 | 3.5 | B |
| 27111407 | Chili con carne with beans, canned                                           | 8000_Mixed | 35 | 34 | 1  | 4 | 3.5 | C |
| 58104500 | Chimichanga with meat                                                        | 8000_Mixed | 35 | 34 | 1  | 3 | 2.5 | D |
| 58104540 | Chimichanga, meatless, with sour cream                                       | 8000_Mixed | 35 | 34 | 1  | 3 | 3   | C |
| 58104550 | Chimichanga with chicken and sour cream                                      | 8000_Mixed | 35 | 33 | 2  | 3 | 2.5 | D |
| 32202200 | Egg and cheese on biscuit                                                    | 8000_Mixed | 35 | 32 | 3  | 3 | 1.5 | E |
| 58100360 | Chilaquiles, tortilla casserole with salsa, cheese, and egg                  | 8000_Mixed | 35 | 32 | 3  | 3 | 2.5 | D |
| 27220080 | Ham croquette                                                                | 8000_Mixed | 35 | 31 | 4  | 3 | 1.5 | E |
| 71801000 | Potato soup, NS as to made with milk or water                                | 8000_Mixed | 35 | 31 | 4  | 3 | 3   | C |
| 58107230 | White pizza, thick crust                                                     | 8000_Mixed | 35 | 30 | 5  | 2 | 2   | D |
| 14710200 | Beer cheese soup, made with milk                                             | 8000_Mixed | 35 | 29 | 6  | 3 | 2   | D |
| 27510331 | Bacon cheeseburger, 1 medium patty, plain, on white bun                      | 8000_Mixed | 35 | 29 | 6  | 3 | 2   | D |
| 27520520 | Pork sandwich                                                                | 8000_Mixed | 35 | 29 | 6  | 3 | 4   | B |
| 58164500 | Rice, white, with cheese and/or cream based sauce, NS as to fat              | 8000_Mixed | 35 | 29 | 6  | 2 | 3   | C |
| 27540130 | Chicken barbecue sandwich                                                    | 8000_Mixed | 35 | 28 | 7  | 3 | 3.5 | C |
| 32202085 | Egg, cheese and bacon on bagel                                               | 8000_Mixed | 35 | 28 | 7  | 3 | 2   | D |
| 58106510 | Pizza with meat, NS as to type of crust                                      | 8000_Mixed | 35 | 28 | 7  | 2 | 2   | D |
| 58116115 | Empanada, Mexican turnover, filled with cheese and vegetables                | 8000_Mixed | 35 | 28 | 7  | 2 | 2   | D |
| 58164520 | Rice, white, with cheese and/or cream based sauce, fat added                 | 8000_Mixed | 35 | 28 | 7  | 2 | 3   | C |
| 58161110 | Rice casserole with cheese                                                   | 8000_Mixed | 35 | 27 | 8  | 2 | 3   | D |
| 27220210 | Ham and noodles, no sauce                                                    | 8000_Mixed | 35 | 26 | 9  | 2 | 3   | C |
| 58101800 | Ground beef with tomato sauce and taco seasonings on a cornbread crust       | 8000_Mixed | 35 | 26 | 9  | 3 | 3   | D |
| 58160312 | Rice with peas and carrots, fat not added in cooking                         | 8000_Mixed | 35 | 26 | 9  | 1 | 3.5 | C |
| 58145136 | Macaroni or noodles with cheese and meat, prepared from Hamburger Helper mix | 8000_Mixed | 35 | 25 | 10 | 2 | 3.5 | C |
| 75142000 | Cucumber and vegetable namasu                                                | 8000_Mixed | 34 | 39 | -5 | 2 | 3.5 | B |
| 58109130 | Pizza, with meat, gluten-free thick crust                                    | 8000_Mixed | 34 | 37 | -3 | 4 | 2.5 | D |
| 58146683 | Pasta, whole grain, with cream sauce, ready-to-heat                          | 8000_Mixed | 34 | 37 | -3 | 4 | 3   | D |
| 75651060 | Vegetable chicken or turkey soup, canned, undiluted                          | 8000_Mixed | 34 | 36 | -2 | 4 | 3   | C |
| 28141060 | Chicken patty with vegetable (diet frozen meal)                              | 8000_Mixed | 34 | 35 | -1 | 4 | 3.5 | C |
| 58111110 | Wonton, fried, filled with meat, poultry, or seafood,                        | 8000_Mixed | 34 | 35 | -1 | 4 | 3   | C |
| 58111130 | Wonton, fried, filled with meat, poultry, or seafood, and vegetable          | 8000_Mixed | 34 | 35 | -1 | 4 | 3   | C |

|          |                                                                                       |            |    |    |    |   |     |   |
|----------|---------------------------------------------------------------------------------------|------------|----|----|----|---|-----|---|
| 73211110 | Sweet potato and pumpkin casserole, Puerto Rican style                                | 8000_Mixed | 34 | 35 | -1 | 2 | 3.5 | C |
| 75651110 | Vegetable chicken rice soup, canned, prepared with water or ready-to-serve            | 8000_Mixed | 34 | 35 | -1 | 4 | 3.5 | B |
| 58104530 | Chimichanga with chicken                                                              | 8000_Mixed | 34 | 34 | 0  | 3 | 2.5 | D |
| 28133220 | Veal with peppers in sauce, rice (diet frozen meal)                                   | 8000_Mixed | 34 | 33 | 1  | 4 | 4   | B |
| 75418220 | Creamed christophine, Puerto Rican style                                              | 8000_Mixed | 34 | 32 | 2  | 2 | 3   | C |
| 28315120 | Beef vegetable soup with noodles, stew type, chunky style                             | 8000_Mixed | 34 | 31 | 3  | 4 | 3.5 | B |
| 58200250 | Wrap sandwich, filled with vegetables                                                 | 8000_Mixed | 34 | 30 | 4  | 3 | 3.5 | C |
| 58100015 | Burrito, taco, or quesadilla with egg, potato, and breakfast meat                     | 8000_Mixed | 34 | 27 | 7  | 3 | 3   | D |
| 58101741 | Soft taco with egg, potato, and cheese                                                | 8000_Mixed | 34 | 27 | 7  | 3 | 3   | D |
| 58126140 | Turnover, meat- and bean-filled, no gravy                                             | 8000_Mixed | 34 | 27 | 7  | 2 | 2   | D |
| 58126180 | Turnover, meat-, potato-, and vegetable-filled, no gravy                              | 8000_Mixed | 34 | 27 | 7  | 2 | 3   | D |
| 58121620 | Dumpling, vegetable                                                                   | 8000_Mixed | 34 | 26 | 8  | 1 | 3   | C |
| 58126310 | Turnover, chicken, with gravy                                                         | 8000_Mixed | 34 | 26 | 8  | 2 | 3   | D |
| 58146422 | Pasta with cream sauce and poultry, home recipe                                       | 8000_Mixed | 34 | 26 | 8  | 2 | 3.5 | C |
| 28310330 | Pho                                                                                   | 8000_Mixed | 34 | 25 | 9  | 1 | 3.5 | C |
| 32201000 | Fried egg sandwich                                                                    | 8000_Mixed | 34 | 24 | 10 | 3 | 3.5 | C |
| 58160322 | Rice with tomatoes, fat not added in cooking                                          | 8000_Mixed | 34 | 24 | 10 | 1 | 3.5 | C |
| 58160410 | Rice, white, with corn, no added fat                                                  | 8000_Mixed | 34 | 24 | 10 | 1 | 3.5 | B |
| 58160710 | Rice, white, with other vegetables, no added fat                                      | 8000_Mixed | 34 | 24 | 10 | 1 | 3.5 | C |
| 58103250 | Tamale, plain, meatless, no sauce, Mexican style                                      | 8000_Mixed | 34 | 23 | 11 | 1 | 3.5 | C |
| 58301150 | Zucchini lasagna, diet frozen meal                                                    | 8000_Mixed | 33 | 37 | -4 | 4 | 3.5 | B |
| 58303100 | Rice, with broccoli, cheese sauce, frozen side dish                                   | 8000_Mixed | 33 | 36 | -3 | 4 | 3.5 | C |
| 58106830 | Pizza with beans and vegetables, thick crust                                          | 8000_Mixed | 33 | 35 | -2 | 4 | 3   | D |
| 58109120 | Pizza, with meat, gluten-free thin crust                                              | 8000_Mixed | 33 | 35 | -2 | 4 | 2   | D |
| 27111420 | Chili con carne without beans                                                         | 8000_Mixed | 33 | 34 | -1 | 4 | 3   | C |
| 28143130 | Chicken and vegetable entree with noodles, frozen meal                                | 8000_Mixed | 33 | 34 | -1 | 4 | 4   | C |
| 28143190 | Chicken in mushroom sauce, white and wild rice, vegetable, frozen meal                | 8000_Mixed | 33 | 34 | -1 | 4 | 3.5 | C |
| 75651050 | Vegetable chicken or turkey soup, prepared with water or ready-to-serve               | 8000_Mixed | 33 | 34 | -1 | 4 | 3   | C |
| 27510246 | Cheeseburger, on wheat bun, 1 large patty                                             | 8000_Mixed | 33 | 33 | 0  | 4 | 2   | D |
| 27564390 | Frankfurter or hot dog sandwich, fat free, plain, on whole wheat bread                | 8000_Mixed | 33 | 33 | 0  | 4 | 3.5 | C |
| 28145100 | Turkey with gravy, dressing, vegetable and fruit, diet frozen meal                    | 8000_Mixed | 33 | 33 | 0  | 4 | 4   | B |
| 41602090 | Split pea and ham soup, canned, reduced sodium, prepared with water or ready-to-serve | 8000_Mixed | 33 | 33 | 0  | 4 | 3.5 | B |
| 58100145 | Burrito with meat, beans, and sour cream, from fast food                              | 8000_Mixed | 33 | 33 | 0  | 4 | 3.5 | C |
| 58306200 | Chicken fajitas, diet frozen meal                                                     | 8000_Mixed | 33 | 32 | 1  | 4 | 4   | A |
| 58104510 | Chimichanga with beef, cheese, lettuce and tomato                                     | 8000_Mixed | 33 | 30 | 3  | 3 | 3   | D |
| 58164210 | Rice dessert or salad with fruit                                                      | 8000_Mixed | 33 | 29 | 4  | 3 | 3   | C |
| 58124500 | Pastry, filled with potatoes and peas, fried                                          | 8000_Mixed | 33 | 28 | 5  | 2 | 2   | D |

|          |                                                                              |            |    |    |    |   |     |   |
|----------|------------------------------------------------------------------------------|------------|----|----|----|---|-----|---|
| 27513070 | Roast beef submarine sandwich, on roll, au jus                               | 8000_Mixed | 33 | 27 | 6  | 2 | 3.5 | C |
| 58161200 | Rice, cooked with coconut milk                                               | 8000_Mixed | 33 | 27 | 6  | 2 | 1.5 | D |
| 27113200 | Creamed chipped or dried beef                                                | 8000_Mixed | 33 | 26 | 7  | 3 | 3   | C |
| 27513020 | Roast beef sandwich, with gravy                                              | 8000_Mixed | 33 | 26 | 7  | 2 | 3   | D |
| 58126170 | Turnover filled with meat and vegetable, no potatoes, no gravy               | 8000_Mixed | 33 | 26 | 7  | 2 | 3   | D |
| 58146392 | Pasta with cream sauce and added vegetables, from home recipe                | 8000_Mixed | 33 | 26 | 7  | 2 | 3   | C |
| 58155810 | Stewed rice, Puerto Rican style                                              | 8000_Mixed | 33 | 26 | 7  | 1 | 2.5 | D |
| 58164530 | Rice, white, with gravy, NS as to fat                                        | 8000_Mixed | 33 | 26 | 7  | 2 | 3   | C |
| 27213300 | Beef and rice with cream sauce                                               | 8000_Mixed | 33 | 25 | 8  | 1 | 3.5 | C |
| 58100010 | Burrito, taco, or quesadilla with egg and breakfast meat                     | 8000_Mixed | 33 | 25 | 8  | 3 | 3   | D |
| 58164550 | Rice, white, with gravy, fat added                                           | 8000_Mixed | 33 | 25 | 8  | 2 | 3   | C |
| 58165040 | Rice, white, with vegetables and gravy, no added fat                         | 8000_Mixed | 33 | 24 | 9  | 1 | 3.5 | C |
| 58103120 | Tamale with meat                                                             | 8000_Mixed | 33 | 23 | 10 | 1 | 3   | D |
| 58103130 | Tamale with chicken                                                          | 8000_Mixed | 33 | 23 | 10 | 1 | 3   | D |
| 28320130 | Ham, rice, and potato soup, Puerto Rican style                               | 8000_Mixed | 33 | 22 | 11 | 2 | 3.5 | C |
| 28340700 | Bird's nest soup                                                             | 8000_Mixed | 33 | 20 | 13 | 2 | 3   | C |
| 28316020 | Beef and mushroom soup, canned, low sodium                                   | 8000_Mixed | 32 | 36 | -4 | 4 | 3.5 | A |
| 58304200 | Ravioli, cheese-filled, with tomato sauce, diet frozen meal                  | 8000_Mixed | 32 | 36 | -4 | 4 | 3.5 | C |
| 14640044 | Cheese sandwich, reduced fat Cheddar cheese, on white bread, with mayonnaise | 8000_Mixed | 32 | 35 | -3 | 4 | 2   | D |
| 75649020 | Vegetable soup, canned, undiluted                                            | 8000_Mixed | 32 | 35 | -3 | 4 | 3.5 | C |
| 27510196 | Cheeseburger, on wheat bun, 1 small patty                                    | 8000_Mixed | 32 | 34 | -2 | 4 | 2   | D |
| 58104180 | Nachos with meat, cheese, and sour cream                                     | 8000_Mixed | 32 | 34 | -2 | 4 | 3.5 | C |
| 27510242 | Cheeseburger, on wheat bun, 1 medium patty                                   | 8000_Mixed | 32 | 33 | -1 | 4 | 2   | D |
| 27510258 | Double cheeseburger, on wheat bun, 2 medium patties                          | 8000_Mixed | 32 | 33 | -1 | 4 | 2   | D |
| 27564400 | Frankfurter or hot dog sandwich, fat free, plain, on whole grain white bread | 8000_Mixed | 32 | 33 | -1 | 4 | 3.5 | C |
| 28140150 | Chicken divan, frozen meal                                                   | 8000_Mixed | 32 | 33 | -1 | 4 | 3.5 | C |
| 28340179 | Beef broth, less or reduced sodium, canned or ready-to-serve                 | 8000_Mixed | 32 | 33 | -1 | 4 | 3.5 | B |
| 58306100 | Chicken enchilada, diet frozen meal                                          | 8000_Mixed | 32 | 33 | -1 | 4 | 3.5 | C |
| 58402020 | Beef dumpling soup, home recipe, canned or ready-to-serve                    | 8000_Mixed | 32 | 32 | 0  | 4 | 3.5 | C |
| 58402030 | Beef rice soup, home recipe, canned or ready-to-serve                        | 8000_Mixed | 32 | 32 | 0  | 4 | 3.5 | C |
| 75656060 | Vegetable beef soup, chunky style                                            | 8000_Mixed | 32 | 32 | 0  | 4 | 3.5 | C |
| 14620330 | Topping from meat and vegetable pizza                                        | 8000_Mixed | 32 | 31 | 1  | 4 | 1.5 | E |
| 75608200 | Onion soup, made from dry mix                                                | 8000_Mixed | 32 | 31 | 1  | 4 | 3   | C |
| 28315130 | Beef vegetable soup with rice, stew type, chunky style                       | 8000_Mixed | 32 | 29 | 3  | 4 | 3.5 | B |
| 28152030 | Seafood newburg with rice, vegetable (frozen meal)                           | 8000_Mixed | 32 | 26 | 6  | 4 | 3   | C |
| 58100130 | Burrito with beef and cheese, no beans                                       | 8000_Mixed | 32 | 26 | 6  | 3 | 1.5 | D |
| 27520530 | Pork sandwich, with gravy                                                    | 8000_Mixed | 32 | 25 | 7  | 3 | 3.5 | C |
| 58100340 | Burrito with eggs, sausage, cheese and vegetables                            | 8000_Mixed | 32 | 25 | 7  | 3 | 2.5 | D |

|          |                                                                                         |            |    |    |    |   |     |   |
|----------|-----------------------------------------------------------------------------------------|------------|----|----|----|---|-----|---|
| 58101740 | Soft taco with egg and potato                                                           | 8000_Mixed | 32 | 25 | 7  | 3 | 3   | D |
| 58106530 | Pizza with meat, thick crust                                                            | 8000_Mixed | 32 | 25 | 7  | 2 | 2   | D |
| 58163510 | Rice dressing                                                                           | 8000_Mixed | 32 | 25 | 7  | 2 | 3   | C |
| 27513030 | Roast beef sandwich dipped in egg, fried, with gravy and spread                         | 8000_Mixed | 32 | 24 | 8  | 2 | 3   | D |
| 58100250 | Burrito with chicken, rice, and cheese                                                  | 8000_Mixed | 32 | 24 | 8  | 3 | 3.5 | C |
| 58146402 | Pasta with cream sauce and meat, home recipe                                            | 8000_Mixed | 32 | 24 | 8  | 2 | 3   | C |
| 58160000 | Biryani with vegetables                                                                 | 8000_Mixed | 32 | 23 | 9  | 1 | 3.5 | C |
| 58148118 | Macaroni or pasta salad, made with any type of fat free dressing                        | 8000_Mixed | 32 | 22 | 10 | 1 | 3.5 | C |
| 58151170 | Sushi roll, avocado                                                                     | 8000_Mixed | 32 | 22 | 10 | 1 | 3   | C |
| 58151230 | Sushi roll, vegetable                                                                   | 8000_Mixed | 32 | 22 | 10 | 1 | 3   | C |
| 58160292 | Rice with corn, fat not added in cooking                                                | 8000_Mixed | 32 | 21 | 11 | 1 | 3   | C |
| 58150320 | Rice, fried, with chicken                                                               | 8000_Mixed | 32 | 20 | 12 | 1 | 3.5 | C |
| 14640038 | Cheese sandwich, reduced fat American cheese, on white bread, with mayonnaise           | 8000_Mixed | 31 | 39 | -8 | 4 | 1.5 | D |
| 58130016 | Lasagna with meat, frozen                                                               | 8000_Mixed | 31 | 34 | -3 | 4 | 3.5 | C |
| 58146333 | Pasta with tomato-based sauce, meat, and added vegetables, ready-to-heat                | 8000_Mixed | 31 | 34 | -3 | 4 | 3.5 | B |
| 58201045 | Jelly sandwich, reduced sugar jelly, on wheat bread                                     | 8000_Mixed | 31 | 34 | -3 | 4 | 3.5 | C |
| 58201055 | Jelly sandwich, reduced sugar jelly, on whole wheat bread                               | 8000_Mixed | 31 | 34 | -3 | 4 | 3.5 | C |
| 27540235 | Chicken fillet, broiled, sandwich with lettuce, tomato, and spread                      | 8000_Mixed | 31 | 33 | -2 | 4 | 4   | A |
| 27540270 | Chicken fillet, broiled, sandwich, with lettuce, tomato, and non-mayonnaise type spread | 8000_Mixed | 31 | 33 | -2 | 4 | 4   | A |
| 27564362 | Frankfurter or hot dog sandwich, fat free, plain, on whole wheat bun                    | 8000_Mixed | 31 | 33 | -2 | 4 | 3.5 | C |
| 58106736 | Pizza with extra meat and extra vegetables, thin crust                                  | 8000_Mixed | 31 | 33 | -2 | 4 | 2   | D |
| 58130011 | Lasagna with meat                                                                       | 8000_Mixed | 31 | 33 | -2 | 4 | 3.5 | C |
| 27510263 | Double cheeseburger, on wheat bun, 2 large patties                                      | 8000_Mixed | 31 | 32 | -1 | 4 | 2   | D |
| 28144100 | Chicken and vegetable entree with noodles and cream sauce, frozen meal                  | 8000_Mixed | 31 | 32 | -1 | 4 | 3.5 | C |
| 27510255 | Double cheeseburger, on wheat bun, 2 small patties                                      | 8000_Mixed | 31 | 31 | 0  | 4 | 2   | D |
| 27564302 | Frankfurter or hot dog sandwich, reduced fat or light, plain, on whole wheat bun        | 8000_Mixed | 31 | 31 | 0  | 4 | 3.5 | D |
| 27564330 | Frankfurter or hot dog sandwich, reduced fat or light, plain, on whole wheat bread      | 8000_Mixed | 31 | 31 | 0  | 4 | 3.5 | D |
| 28110660 | Meatballs, Swedish, in gravy, with noodles, diet frozen meal                            | 8000_Mixed | 31 | 31 | 0  | 4 | 4   | B |
| 28310110 | Beef, broth, bouillon, or consomme                                                      | 8000_Mixed | 31 | 31 | 0  | 4 | 3   | C |
| 28360100 | Meat broth, Puerto Rican style                                                          | 8000_Mixed | 31 | 31 | 0  | 4 | 3   | C |
| 58145140 | Macaroni or noodles with cheese and tomato                                              | 8000_Mixed | 31 | 30 | 1  | 3 | 3.5 | C |
| 14640068 | Cheese sandwich, reduced fat Cheddar cheese, on white bread, with butter                | 8000_Mixed | 31 | 29 | 2  | 3 | 1.5 | E |
| 58104535 | Chimichanga with meat and sour cream                                                    | 8000_Mixed | 31 | 29 | 2  | 3 | 2   | D |
| 58109030 | Pizza, with meat, whole wheat thin crust                                                | 8000_Mixed | 31 | 29 | 2  | 3 | 2   | D |
| 27118130 | Stewed dried beef, Puerto Rican style                                                   | 8000_Mixed | 31 | 27 | 4  | 3 | 0.5 | E |
| 58107050 | Pizza, no cheese, thin crust                                                            | 8000_Mixed | 31 | 26 | 5  | 2 | 2   | D |

|          |                                                                                          |            |    |    |    |   |     |   |
|----------|------------------------------------------------------------------------------------------|------------|----|----|----|---|-----|---|
| 27513060 | Roast beef sandwich with bacon and cheese sauce                                          | 8000_Mixed | 31 | 25 | 6  | 3 | 1.5 | E |
| 58106780 | Pizza with meat and vegetables, prepared from frozen, lowfat, thin crust                 | 8000_Mixed | 31 | 24 | 7  | 2 | 3.5 | C |
| 58107100 | Pizza, no cheese, thick crust                                                            | 8000_Mixed | 31 | 24 | 7  | 2 | 3   | D |
| 58164560 | Rice, white, with soy-based sauce, NS as to fat                                          | 8000_Mixed | 31 | 24 | 7  | 1 | 3   | C |
| 58164580 | Rice, white, with soy-based sauce, fat added                                             | 8000_Mixed | 31 | 24 | 7  | 1 | 3   | C |
| 27212100 | Beef and noodles with tomato-based sauce                                                 | 8000_Mixed | 31 | 23 | 8  | 2 | 3.5 | B |
| 58103200 | Tamale, plain, meatless, no sauce, Puerto Rican style or Caribbean Style                 | 8000_Mixed | 31 | 23 | 8  | 2 | 2   | E |
| 58164510 | Rice, white, with cheese and/or cream based sauce, no added fat                          | 8000_Mixed | 31 | 23 | 8  | 2 | 3   | C |
| 27220010 | Meat loaf made with ham                                                                  | 8000_Mixed | 31 | 22 | 9  | 3 | 2   | D |
| 58150330 | Rice, fried, with pork                                                                   | 8000_Mixed | 31 | 19 | 12 | 1 | 3.5 | B |
| 74701000 | Tomato sandwich                                                                          | 8000_Mixed | 30 | 35 | -5 | 4 | 3.5 | C |
| 74605000 | Tomato rice soup, canned, undiluted                                                      | 8000_Mixed | 30 | 34 | -4 | 4 | 3   | C |
| 27540186 | Chicken fillet sandwich, fried, on wheat bun, with cheese                                | 8000_Mixed | 30 | 33 | -3 | 4 | 2.5 | D |
| 58104100 | Nachos with cheese, meatless, no beans                                                   | 8000_Mixed | 30 | 33 | -3 | 4 | 3.5 | C |
| 58106345 | Pizza with cheese and extra vegetables, thin crust                                       | 8000_Mixed | 30 | 33 | -3 | 4 | 3   | D |
| 58146323 | Pasta with tomato-based sauce and meat, ready-to-heat                                    | 8000_Mixed | 30 | 33 | -3 | 4 | 3.5 | C |
| 58304250 | Manicotti, cheese-filled, with tomato sauce, diet frozen meal                            | 8000_Mixed | 30 | 33 | -3 | 4 | 3.5 | C |
| 75603020 | Celery soup, cream of, prepared with water, home recipe, canned or ready-to-serve        | 8000_Mixed | 30 | 33 | -3 | 4 | 3.5 | C |
| 75603030 | Celery soup, cream of, canned, undiluted                                                 | 8000_Mixed | 30 | 33 | -3 | 4 | 3   | C |
| 27520130 | Bacon, chicken, and tomato club sandwich, with lettuce and spread                        | 8000_Mixed | 30 | 32 | -2 | 4 | 3.5 | D |
| 27520135 | Bacon, chicken, and tomato club sandwich, with cheese, lettuce and spread                | 8000_Mixed | 30 | 32 | -2 | 4 | 3.5 | D |
| 27540285 | Chicken, bacon, and tomato club sandwich, with lettuce and spread                        | 8000_Mixed | 30 | 32 | -2 | 4 | 3.5 | D |
| 58145114 | Macaroni or noodles with cheese, made from dry mix                                       | 8000_Mixed | 30 | 32 | -2 | 4 | 3.5 | C |
| 14640020 | Cheese sandwich, reduced fat Cheddar cheese, on white bread, no spread                   | 8000_Mixed | 30 | 31 | -1 | 4 | 2   | D |
| 14640032 | Cheese sandwich, Cheddar cheese, on white bread, with mayonnaise                         | 8000_Mixed | 30 | 31 | -1 | 4 | 1.5 | D |
| 58301030 | Veal lasagna, diet frozen meal                                                           | 8000_Mixed | 30 | 31 | -1 | 4 | 3.5 | C |
| 58306010 | Beef enchilada dinner, NFS, frozen meal                                                  | 8000_Mixed | 30 | 31 | -1 | 4 | 3.5 | C |
| 27564340 | Frankfurter or hot dog sandwich, reduced fat or light, plain, on whole grain white bread | 8000_Mixed | 30 | 30 | 0  | 4 | 3.5 | C |
| 27520156 | Bacon, lettuce, tomato, and cheese submarine sandwich, with spread                       | 8000_Mixed | 30 | 28 | 2  | 4 | 2   | D |
| 28340110 | Chicken or turkey broth, bouillon, or consomme                                           | 8000_Mixed | 30 | 28 | 2  | 4 | 3   | C |
| 41601160 | Bean and ham soup, canned, reduced sodium, prepared with water or ready-to-serve         | 8000_Mixed | 30 | 27 | 3  | 4 | 4   | B |
| 58125180 | Cheese quiche, meatless                                                                  | 8000_Mixed | 30 | 27 | 3  | 3 | 1   | D |
| 58109040 | Pizza, with meat, whole wheat thick crust                                                | 8000_Mixed | 30 | 26 | 4  | 3 | 2.5 | D |
| 58104900 | Taquito or flauta with egg                                                               | 8000_Mixed | 30 | 24 | 6  | 3 | 2.5 | D |
| 58132710 | Spaghetti with tomato sauce and frankfurters or hot dogs                                 | 8000_Mixed | 30 | 24 | 6  | 3 | 3   | C |

|          |                                                                                                  |            |    |    |    |   |     |   |
|----------|--------------------------------------------------------------------------------------------------|------------|----|----|----|---|-----|---|
| 58116310 | Cheese turnover, Puerto Rican style                                                              | 8000_Mixed | 30 | 23 | 7  | 2 | 1   | E |
| 58126110 | Turnover, meat-filled, no gravy                                                                  | 8000_Mixed | 30 | 23 | 7  | 2 | 2   | D |
| 27520500 | Pork sandwich, on white roll, with onions, dill pickles and barbecue sauce                       | 8000_Mixed | 30 | 22 | 8  | 3 | 3   | D |
| 58106910 | Pizza with seafood, thin crust                                                                   | 8000_Mixed | 30 | 22 | 8  | 2 | 1.5 | D |
| 58106915 | Pizza with seafood, regular crust                                                                | 8000_Mixed | 30 | 22 | 8  | 2 | 2   | D |
| 58106920 | Pizza with seafood, thick crust                                                                  | 8000_Mixed | 30 | 22 | 8  | 2 | 2   | D |
| 58113110 | Dumpling, fried, pork                                                                            | 8000_Mixed | 30 | 22 | 8  | 2 | 3   | D |
| 58121510 | Dumpling, meat-filled                                                                            | 8000_Mixed | 30 | 22 | 8  | 2 | 2   | D |
| 58147330 | Macaroni or noodles, creamed, with cheese                                                        | 8000_Mixed | 30 | 21 | 9  | 2 | 3   | C |
| 58116210 | Meat pie, Puerto Rican style                                                                     | 8000_Mixed | 30 | 20 | 10 | 2 | 0.5 | E |
| 58155610 | Rice meal fritter, Puerto Rican style                                                            | 8000_Mixed | 30 | 20 | 10 | 1 | 2   | D |
| 27540185 | Chicken fillet sandwich, fried, on wheat bun                                                     | 8000_Mixed | 29 | 33 | -4 | 4 | 3.5 | D |
| 74605010 | Tomato rice soup, prepared with water                                                            | 8000_Mixed | 29 | 33 | -4 | 4 | 3   | C |
| 14640200 | Cheese sandwich, hoagie                                                                          | 8000_Mixed | 29 | 31 | -2 | 4 | 1.5 | E |
| 27510359 | Cheeseburger, 1/3 lb meat, with mayonnaise or salad dressing, and mushrooms, on bun              | 8000_Mixed | 29 | 31 | -2 | 4 | 3   | D |
| 27510576 | Hamburger, on wheat bun, 1 small patty                                                           | 8000_Mixed | 29 | 31 | -2 | 4 | 3.5 | D |
| 27510632 | Hamburger, on wheat bun, 1 medium patty                                                          | 8000_Mixed | 29 | 31 | -2 | 4 | 3.5 | D |
| 27540280 | Chicken fillet, broiled, sandwich with cheese, on bun, with lettuce, tomato and spread           | 8000_Mixed | 29 | 31 | -2 | 4 | 4   | A |
| 58134620 | Tortellini, cheese-filled, meatless, with tomato sauce                                           | 8000_Mixed | 29 | 31 | -2 | 4 | 3.5 | C |
| 27510636 | Hamburger, on wheat bun, 1 large patty                                                           | 8000_Mixed | 29 | 30 | -1 | 4 | 3.5 | D |
| 27520165 | Bacon, breaded fried chicken fillet, and tomato club with lettuce and spread                     | 8000_Mixed | 29 | 30 | -1 | 4 | 3   | D |
| 28113140 | Beef with spaetzle or rice, vegetable, frozen meal                                               | 8000_Mixed | 29 | 30 | -1 | 4 | 3.5 | C |
| 58106441 | Pizza with chicken and vegetables, thin crust                                                    | 8000_Mixed | 29 | 30 | -1 | 4 | 2   | D |
| 58106737 | Pizza with extra meat and extra vegetables, thick crust                                          | 8000_Mixed | 29 | 30 | -1 | 4 | 3   | D |
| 58304050 | Spaghetti with meat and mushroom sauce, diet frozen meal                                         | 8000_Mixed | 29 | 30 | -1 | 4 | 3.5 | C |
| 58402010 | Beef noodle soup, canned or ready-to-serve                                                       | 8000_Mixed | 29 | 30 | -1 | 4 | 3.5 | C |
| 27510652 | Double hamburger, on wheat bun, 2 small patties                                                  | 8000_Mixed | 29 | 29 | 0  | 4 | 3.5 | D |
| 28110120 | Beef with potatoes (frozen meal, large meat portion)                                             | 8000_Mixed | 29 | 29 | 0  | 4 | 3   | D |
| 14640185 | Grilled cheese sandwich, reduced fat Cheddar cheese, on white bread                              | 8000_Mixed | 29 | 28 | 1  | 3 | 1.5 | E |
| 28141200 | Chicken teriyaki with rice, vegetable (frozen meal)                                              | 8000_Mixed | 29 | 28 | 1  | 4 | 3   | C |
| 28315100 | Beef vegetable soup with potato, stew type                                                       | 8000_Mixed | 29 | 28 | 1  | 4 | 3.5 | C |
| 28340610 | Chicken or turkey vegetable soup, stew type                                                      | 8000_Mixed | 29 | 28 | 1  | 4 | 3.5 | B |
| 28340640 | Chicken or turkey vegetable soup with noodles, stew type, chunky style, canned or ready-to-serve | 8000_Mixed | 29 | 28 | 1  | 4 | 3.5 | B |
| 58125110 | Quiche with meat, poultry or fish                                                                | 8000_Mixed | 29 | 26 | 3  | 3 | 1   | E |
| 27146400 | Chicken kiev                                                                                     | 8000_Mixed | 29 | 25 | 4  | 3 | 1.5 | D |
| 58104450 | Chimichanga with beef and tomato                                                                 | 8000_Mixed | 29 | 24 | 5  | 3 | 2   | D |

|          |                                                                                                                         |            |    |    |    |   |     |   |
|----------|-------------------------------------------------------------------------------------------------------------------------|------------|----|----|----|---|-----|---|
| 32202034 | Egg, cheese, and sausage on bun                                                                                         | 8000_Mixed | 29 | 23 | 6  | 3 | 2   | D |
| 27120080 | Ham stroganoff                                                                                                          | 8000_Mixed | 29 | 21 | 8  | 3 | 2.5 | D |
| 27510130 | Beef barbecue submarine sandwich, on bun                                                                                | 8000_Mixed | 29 | 21 | 8  | 3 | 3.5 | C |
| 58150340 | Rice, fried, with beef                                                                                                  | 8000_Mixed | 29 | 18 | 11 | 1 | 3.5 | B |
| 58163210 | Rice, creamed                                                                                                           | 8000_Mixed | 29 | 18 | 11 | 1 | 3   | C |
| 14640026 | Cheese sandwich, American cheese, on white bread, with mayonnaise                                                       | 8000_Mixed | 28 | 33 | -5 | 4 | 1.5 | E |
| 58106300 | Pizza, cheese, with vegetables, from frozen, thin crust                                                                 | 8000_Mixed | 28 | 32 | -4 | 4 | 3.5 | C |
| 74601000 | Tomato soup, NFS                                                                                                        | 8000_Mixed | 28 | 32 | -4 | 4 | 3.5 | C |
| 27420020 | Ham or pork salad                                                                                                       | 8000_Mixed | 28 | 31 | -3 | 4 | 2   | D |
| 27510380 | Triple cheeseburger (3 patties, 1/4 lb meat each), with mayonnaise or salad dressing and tomatoes and/or catsup, on bun | 8000_Mixed | 28 | 31 | -3 | 4 | 2   | D |
| 28160300 | Meat loaf dinner, NFS, frozen meal                                                                                      | 8000_Mixed | 28 | 31 | -3 | 4 | 3.5 | C |
| 28160310 | Meat loaf with potatoes, vegetable, frozen meal                                                                         | 8000_Mixed | 28 | 31 | -3 | 4 | 3.5 | C |
| 58100325 | Burrito with beans, meatless, from fast food                                                                            | 8000_Mixed | 28 | 31 | -3 | 4 | 3.5 | C |
| 74602030 | Tomato soup, canned, undiluted                                                                                          | 8000_Mixed | 28 | 31 | -3 | 4 | 3   | C |
| 28145610 | Turkey with gravy, dressing, potatoes, vegetable, dessert, frozen meal                                                  | 8000_Mixed | 28 | 30 | -2 | 4 | 3.5 | C |
| 27510659 | Double hamburger, on wheat bun, 2 large patties                                                                         | 8000_Mixed | 28 | 29 | -1 | 4 | 2   | D |
| 58106411 | Pizza with chicken, thin crust                                                                                          | 8000_Mixed | 28 | 29 | -1 | 4 | 2   | D |
| 58106720 | Pizza with meat and vegetables, from restaurant or fast food, thin crust                                                | 8000_Mixed | 28 | 29 | -1 | 4 | 2   | D |
| 58106738 | Pizza with extra meat and extra vegetables, medium crust                                                                | 8000_Mixed | 28 | 29 | -1 | 4 | 3.5 | D |
| 27510657 | Double hamburger, on wheat bun, 2 medium patties                                                                        | 8000_Mixed | 28 | 28 | 0  | 4 | 3.5 | D |
| 41601110 | Bean and ham soup, chunky style, canned or ready-to-serve                                                               | 8000_Mixed | 28 | 28 | 0  | 4 | 3.5 | B |
| 58100370 | Chilaquiles, tortilla casserole with salsa and cheese, no egg                                                           | 8000_Mixed | 28 | 28 | 0  | 4 | 2.5 | C |
| 58106443 | Pizza with chicken and vegetables, thick crust                                                                          | 8000_Mixed | 28 | 28 | 0  | 4 | 3   | D |
| 58134613 | Tortellini, meat-filled, with tomato sauce, canned                                                                      | 8000_Mixed | 28 | 28 | 0  | 4 | 3.5 | B |
| 58106442 | Pizza with chicken and vegetables, regular crust                                                                        | 8000_Mixed | 28 | 27 | 1  | 4 | 3.5 | D |
| 58131520 | Ravioli, cheese-filled, with tomato sauce                                                                               | 8000_Mixed | 28 | 27 | 1  | 4 | 3.5 | C |
| 75609000 | Pea soup, NFS                                                                                                           | 8000_Mixed | 28 | 27 | 1  | 4 | 3.5 | C |
| 75609020 | Pea soup, prepared with water                                                                                           | 8000_Mixed | 28 | 27 | 1  | 4 | 3.5 | C |
| 28340510 | Chicken or turkey noodle soup, chunky style, canned or ready-to-serve                                                   | 8000_Mixed | 28 | 26 | 2  | 4 | 3.5 | B |
| 58404510 | Chicken or turkey soup with dumplings and potatoes, home recipe, canned, or ready-to-serve                              | 8000_Mixed | 28 | 26 | 2  | 4 | 3.5 | B |
| 58404520 | Chicken or turkey soup with dumplings, home recipe, canned or ready-to-serve                                            | 8000_Mixed | 28 | 26 | 2  | 4 | 3.5 | B |
| 14640056 | Cheese sandwich, Cheddar cheese, on white bread, with butter                                                            | 8000_Mixed | 28 | 25 | 3  | 3 | 1.5 | E |
| 58107232 | White pizza, cheese, with meat and vegetables, thin crust                                                               | 8000_Mixed | 28 | 25 | 3  | 3 | 2   | D |
| 75604020 | Corn soup, cream of, prepared with water                                                                                | 8000_Mixed | 28 | 24 | 4  | 3 | 3.5 | B |
| 58104905 | Taquito or flauta with egg and breakfast meat                                                                           | 8000_Mixed | 28 | 22 | 6  | 3 | 2   | D |
| 28345120 | Chicken or turkey soup, cream of, prepared with milk                                                                    | 8000_Mixed | 28 | 21 | 7  | 3 | 3   | C |

|          |                                                                                                                                    |            |    |    |    |   |     |   |
|----------|------------------------------------------------------------------------------------------------------------------------------------|------------|----|----|----|---|-----|---|
| 58146382 | Pasta with cream sauce, home recipe                                                                                                | 8000_Mixed | 28 | 21 | 7  | 2 | 3   | C |
| 58100155 | Burrito with beef, rice, and cheese                                                                                                | 8000_Mixed | 28 | 20 | 8  | 3 | 3   | D |
| 27220190 | Sausage and noodles with cream or white sauce                                                                                      | 8000_Mixed | 28 | 18 | 10 | 2 | 3   | C |
| 58123110 | Sweet bread dough, filled with meat, steamed                                                                                       | 8000_Mixed | 28 | 18 | 10 | 1 | 3.5 | C |
| 58165070 | Rice, white, with vegetables, soy-based sauce, no added fat                                                                        | 8000_Mixed | 28 | 18 | 10 | 1 | 3   | C |
| 27510676 | Double hamburger, 2 medium patties, with condiments, on bun, from fast food / restaurant                                           | 8000_Mixed | 27 | 30 | -3 | 4 | 3.5 | D |
| 27510681 | Double hamburger, 2 medium patties, with condiments, on bun, from fast food / restaurant (Burger King Double WHOPPER)              | 8000_Mixed | 27 | 30 | -3 | 4 | 3.5 | D |
| 27510682 | Double hamburger, 2 medium patties, with condiments, on bun, from fast food / restaurant (Wendy's 1/2 lb Double)                   | 8000_Mixed | 27 | 30 | -3 | 4 | 3.5 | D |
| 27510690 | Double hamburger (2 patties, 1/4 lb meat each), with mayonnaise or salad dressing and tomatoes and/or catsup, on double-decker bun | 8000_Mixed | 27 | 30 | -3 | 4 | 3.5 | D |
| 58106320 | Pizza, cheese, with vegetables, from restaurant or fast food, thin crust                                                           | 8000_Mixed | 27 | 30 | -3 | 4 | 2   | D |
| 58106350 | Pizza with cheese and extra vegetables, thick crust                                                                                | 8000_Mixed | 27 | 30 | -3 | 4 | 3   | D |
| 58106358 | Pizza, cheese, with fruit, thin crust                                                                                              | 8000_Mixed | 27 | 30 | -3 | 4 | 2   | D |
| 58121610 | Dumpling, potato- or cheese-filled                                                                                                 | 8000_Mixed | 27 | 30 | -3 | 4 | 3   | C |
| 74602010 | Tomato soup, prepared with water, or ready-to-serve                                                                                | 8000_Mixed | 27 | 30 | -3 | 4 | 3.5 | C |
| 74606010 | Tomato vegetable soup, prepared with water                                                                                         | 8000_Mixed | 27 | 30 | -3 | 4 | 3.5 | C |
| 14640050 | Cheese sandwich, American cheese, on white bread, with butter                                                                      | 8000_Mixed | 27 | 29 | -2 | 4 | 1   | E |
| 28130000 | Veal dinner, NFS, frozen meal                                                                                                      | 8000_Mixed | 27 | 29 | -2 | 4 | 3.5 | C |
| 28133110 | Veal, breaded, with spaghetti, in tomato sauce, frozen meal                                                                        | 8000_Mixed | 27 | 29 | -2 | 4 | 3.5 | C |
| 58106347 | Pizza with cheese and extra vegetables, medium crust                                                                               | 8000_Mixed | 27 | 29 | -2 | 4 | 3   | D |
| 27510266 | Cheeseburger, 1 large patty, with condiments, on bun, from fast food / restaurant                                                  | 8000_Mixed | 27 | 28 | -1 | 4 | 3   | D |
| 28133340 | Veal parmigiana with vegetable, fettuccine alfredo, dessert, frozen meal                                                           | 8000_Mixed | 27 | 28 | -1 | 4 | 3.5 | C |
| 41602010 | Pea and ham soup, chunky style, canned or ready-to-serve                                                                           | 8000_Mixed | 27 | 28 | -1 | 4 | 3.5 | B |
| 41602030 | Split pea and ham soup                                                                                                             | 8000_Mixed | 27 | 28 | -1 | 4 | 3.5 | B |
| 58302060 | Spaghetti or noodles with beef in tomato-based sauce, lowfat, reduced sodium (diet frozen meal)                                    | 8000_Mixed | 27 | 28 | -1 | 4 | 3.5 | B |
| 58303200 | Rice, with green beans, water chestnuts, in sherry mushroom sauce, frozen side dish                                                | 8000_Mixed | 27 | 28 | -1 | 4 | 3.5 | B |
| 58304060 | Spaghetti with meat sauce, diet frozen meal                                                                                        | 8000_Mixed | 27 | 28 | -1 | 4 | 3.5 | B |
| 75607050 | Mushroom soup, cream of, low sodium, prepared with water                                                                           | 8000_Mixed | 27 | 28 | -1 | 4 | 3.5 | B |
| 27510346 | Bacon cheeseburger, 1 large patty, with condiments, on bun, from fast food / restaurant                                            | 8000_Mixed | 27 | 27 | 0  | 4 | 3   | D |
| 27564410 | Frankfurter or hot dog sandwich, fat free, plain, on multigrain bread                                                              | 8000_Mixed | 27 | 27 | 0  | 4 | 3.5 | C |
| 28110110 | Beef with potatoes (frozen meal)                                                                                                   | 8000_Mixed | 27 | 27 | 0  | 4 | 3.5 | C |
| 58106413 | Pizza with chicken, thick crust                                                                                                    | 8000_Mixed | 27 | 27 | 0  | 4 | 3   | D |
| 58106735 | Pizza with extra meat and extra vegetables, NS as to type of crust                                                                 | 8000_Mixed | 27 | 27 | 0  | 4 | 3.5 | D |
| 58403030 | Chicken noodle soup, canned, low sodium, ready-to-serve                                                                            | 8000_Mixed | 27 | 27 | 0  | 4 | 3.5 | B |
| 27510451 | Double bacon cheeseburger, 2 medium patties, with condiments, on bun, from fast food / restaurant                                  | 8000_Mixed | 27 | 26 | 1  | 4 | 2   | D |



|          |                                                                                                                              |            |    |    |    |   |     |   |
|----------|------------------------------------------------------------------------------------------------------------------------------|------------|----|----|----|---|-----|---|
| 27510465 | Double bacon cheeseburger, 2 medium patties, with condiments, on bun, from fast food / restaurant (Wendy's Baconator)        | 8000_Mixed | 27 | 26 | 1  | 4 | 2   | D |
| 28143220 | Chicken in barbecue sauce, with rice, vegetable and dessert, reduced fat and sodium (diet frozen meal)                       | 8000_Mixed | 27 | 26 | 1  | 4 | 4   | A |
| 28310210 | Chili beef soup                                                                                                              | 8000_Mixed | 27 | 26 | 1  | 4 | 3.5 | C |
| 58106412 | Pizza with chicken, regular crust                                                                                            | 8000_Mixed | 27 | 26 | 1  | 4 | 3   | D |
| 58106462 | Pizza with chicken and fruit, regular crust                                                                                  | 8000_Mixed | 27 | 26 | 1  | 4 | 3.5 | D |
| 14640125 | Grilled cheese sandwich, Cheddar cheese, on white bread                                                                      | 8000_Mixed | 27 | 25 | 2  | 3 | 1.5 | E |
| 58145112 | Macaroni or noodles with cheese, made from packaged mix                                                                      | 8000_Mixed | 27 | 25 | 2  | 4 | 3   | C |
| 27520410 | Cuban sandwich, with spread                                                                                                  | 8000_Mixed | 27 | 23 | 4  | 3 | 3.5 | D |
| 35001000 | Scrambled eggs, sausage, hash brown potatoes (frozen meal)                                                                   | 8000_Mixed | 27 | 23 | 4  | 4 | 3   | D |
| 58310110 | Frozen breakfast, NFS (frozen meal)                                                                                          | 8000_Mixed | 27 | 23 | 4  | 4 | 3   | D |
| 35002000 | Scrambled eggs, bacon, home fried potatoes (frozen meal)                                                                     | 8000_Mixed | 27 | 22 | 5  | 4 | 3   | D |
| 58100410 | Burrito with beef, cheese, and sour cream                                                                                    | 8000_Mixed | 27 | 21 | 6  | 3 | 3   | C |
| 58107210 | White pizza, NS as to type of crust                                                                                          | 8000_Mixed | 27 | 20 | 7  | 2 | 2   | D |
| 58107225 | White pizza, regular crust                                                                                                   | 8000_Mixed | 27 | 20 | 7  | 2 | 2   | D |
| 58122220 | Gnocchi, potato                                                                                                              | 8000_Mixed | 27 | 18 | 9  | 1 | 3   | C |
| 27220020 | Ham and noodles with cream or white sauce                                                                                    | 8000_Mixed | 27 | 16 | 11 | 2 | 3   | C |
| 58150110 | Rice, fried, meatless                                                                                                        | 8000_Mixed | 27 | 16 | 11 | 1 | 3   | C |
| 58150310 | Rice, fried, NFS                                                                                                             | 8000_Mixed | 27 | 16 | 11 | 1 | 3   | C |
| 58104830 | Taquito or flauta with chicken                                                                                               | 8000_Mixed | 26 | 30 | -4 | 4 | 3.5 | C |
| 58104835 | Taquito or flauta with chicken and cheese                                                                                    | 8000_Mixed | 26 | 30 | -4 | 4 | 3.5 | C |
| 58106250 | Pizza, extra cheese, thin crust                                                                                              | 8000_Mixed | 26 | 29 | -3 | 4 | 2   | E |
| 58106330 | Pizza, cheese, with vegetables, from restaurant or fast food, thick crust                                                    | 8000_Mixed | 26 | 29 | -3 | 4 | 3   | D |
| 58106360 | Pizza, cheese, with fruit, thick crust                                                                                       | 8000_Mixed | 26 | 29 | -3 | 4 | 3   | D |
| 27510430 | Double bacon cheeseburger (2 patties, 1/4 lb meat each), with mayonnaise or salad dressing, and tomato and/or catsup, on bun | 8000_Mixed | 26 | 28 | -2 | 4 | 2   | D |
| 27510435 | Double bacon cheeseburger (2 patties, 1/3 lb meat each), with mayonnaise or salad dressing, on bun                           | 8000_Mixed | 26 | 28 | -2 | 4 | 1.5 | D |
| 58304010 | Spaghetti and meatballs dinner, NFS, frozen meal                                                                             | 8000_Mixed | 26 | 28 | -2 | 4 | 3.5 | B |
| 58306150 | Chicken enchilada with salsa, rice, vegetable, and dessert (diet frozen meal)                                                | 8000_Mixed | 26 | 28 | -2 | 4 | 3.5 | C |
| 27510355 | Cheeseburger, 1/3 lb meat, with mayonnaise or salad dressing, tomato and/or catsup on bun                                    | 8000_Mixed | 26 | 27 | -1 | 4 | 3   | D |
| 27510560 | Hamburger, 1/4 lb meat, with mayonnaise or salad dressing, and tomato and/or catsup, on bun                                  | 8000_Mixed | 26 | 27 | -1 | 4 | 3.5 | C |
| 27510615 | Whopper (Burger King)                                                                                                        | 8000_Mixed | 26 | 27 | -1 | 4 | 3.5 | C |
| 27510616 | Hamburger, 1 medium patty, with condiments, on bun, from fast food / restaurant (Wendy's 1/4 lb Single )                     | 8000_Mixed | 26 | 27 | -1 | 4 | 3.5 | C |
| 27540290 | Chicken submarine sandwich, with lettuce, tomato and spread                                                                  | 8000_Mixed | 26 | 27 | -1 | 4 | 4   | B |
| 28110230 | Sirloin, chopped, or swiss steak with gravy, vegetable, potatoes, dessert or muffin (frozen meal)                            | 8000_Mixed | 26 | 27 | -1 | 4 | 4   | B |
| 41602050 | Split pea soup                                                                                                               | 8000_Mixed | 26 | 27 | -1 | 4 | 3.5 | C |

|          |                                                                                              |            |    |    |    |   |     |   |
|----------|----------------------------------------------------------------------------------------------|------------|----|----|----|---|-----|---|
| 58106650 | Pizza with extra meat, thin crust                                                            | 8000_Mixed | 26 | 27 | -1 | 4 | 1.5 | D |
| 58301080 | Lasagna with cheese and meat sauce, reduced fat and sodium (diet frozen meal)                | 8000_Mixed | 26 | 27 | -1 | 4 | 3.5 | B |
| 58401010 | Barley soup, home recipe, canned, or ready-to-serve                                          | 8000_Mixed | 26 | 27 | -1 | 4 | 3.5 | B |
| 27540291 | Chicken submarine sandwich, with cheese, lettuce, tomato and spread                          | 8000_Mixed | 26 | 26 | 0  | 4 | 4   | B |
| 28143200 | Chicken in soy-based sauce, rice and vegetables, frozen meal                                 | 8000_Mixed | 26 | 26 | 0  | 4 | 3.5 | B |
| 58112510 | Dumpling, steamed, filled with meat, poultry, or seafood                                     | 8000_Mixed | 26 | 26 | 0  | 4 | 3.5 | C |
| 58132113 | Pasta with tomato sauce and cheese, canned                                                   | 8000_Mixed | 26 | 26 | 0  | 4 | 3.5 | C |
| 58132313 | Pasta with tomato sauce and meat or meatballs, canned                                        | 8000_Mixed | 26 | 26 | 0  | 4 | 3.5 | C |
| 75651120 | Vegetable chicken noodle soup, prepared with water or ready-to-serve                         | 8000_Mixed | 26 | 26 | 0  | 4 | 3   | C |
| 27510446 | Double bacon cheeseburger, 2 medium patties, plain, on bun, from fast food / restaurant      | 8000_Mixed | 26 | 25 | 1  | 4 | 2   | D |
| 28133410 | Veal parmigiana with potatoes, vegetable (frozen meal)                                       | 8000_Mixed | 26 | 25 | 1  | 4 | 3.5 | C |
| 28140100 | Chicken dinner, NFS, frozen meal                                                             | 8000_Mixed | 26 | 25 | 1  | 4 | 3.5 | C |
| 28140710 | Chicken, fried, with potatoes, vegetable, frozen meal                                        | 8000_Mixed | 26 | 25 | 1  | 4 | 3.5 | C |
| 28143170 | Chicken in cream sauce with noodles and vegetable, frozen meal                               | 8000_Mixed | 26 | 25 | 1  | 4 | 3.5 | C |
| 28145710 | Turkey tetrazzini, frozen meal                                                               | 8000_Mixed | 26 | 25 | 1  | 4 | 3.5 | B |
| 58104730 | Quesadilla with meat                                                                         | 8000_Mixed | 26 | 24 | 2  | 3 | 1.5 | E |
| 58104740 | Quesadilla with chicken                                                                      | 8000_Mixed | 26 | 24 | 2  | 3 | 1.5 | E |
| 58107222 | White pizza, cheese, with meat, thin crust                                                   | 8000_Mixed | 26 | 23 | 3  | 3 | 2   | D |
| 58124220 | Pastry, egg and cheese filled                                                                | 8000_Mixed | 26 | 19 | 7  | 2 | 2   | D |
| 27520330 | Ham and egg sandwich                                                                         | 8000_Mixed | 26 | 15 | 11 | 3 | 3.5 | C |
| 27540170 | Chicken patty sandwich, miniature, with spread                                               | 8000_Mixed | 25 | 29 | -4 | 4 | 3   | D |
| 27540190 | Chicken patty sandwich, with lettuce and spread                                              | 8000_Mixed | 25 | 29 | -4 | 4 | 3   | D |
| 58106220 | Pizza, cheese, from restaurant or fast food, thin crust                                      | 8000_Mixed | 25 | 29 | -4 | 4 | 2   | E |
| 58201015 | Jelly sandwich, regular jelly, on wheat bread                                                | 8000_Mixed | 25 | 29 | -4 | 4 | 3   | D |
| 58201025 | Jelly sandwich, regular jelly, on whole wheat bread                                          | 8000_Mixed | 25 | 29 | -4 | 4 | 3   | D |
| 27510300 | Double cheeseburger (2 patties), with mayonnaise or salad dressing, on double-decker bun     | 8000_Mixed | 25 | 28 | -3 | 4 | 2   | D |
| 27510370 | Double cheeseburger (2 patties, 1/4 lb meat each), with mayonnaise or salad dressing, on bun | 8000_Mixed | 25 | 28 | -3 | 4 | 2   | D |
| 58104820 | Taquito or flauta with meat                                                                  | 8000_Mixed | 25 | 28 | -3 | 4 | 3   | C |
| 58104825 | Taquito or flauta with meat and cheese                                                       | 8000_Mixed | 25 | 28 | -3 | 4 | 3   | C |
| 58106260 | Pizza, extra cheese, thick crust                                                             | 8000_Mixed | 25 | 28 | -3 | 4 | 2.5 | D |
| 58106305 | Pizza, cheese with vegetables, from frozen, thick crust                                      | 8000_Mixed | 25 | 28 | -3 | 4 | 3   | D |
| 58106500 | Pizza with meat, prepared from frozen, thin crust                                            | 8000_Mixed | 25 | 28 | -3 | 4 | 3   | D |
| 58106730 | Pizza with meat and vegetables, from restaurant or fast food, thick crust                    | 8000_Mixed | 25 | 28 | -3 | 4 | 2.5 | D |
| 51182020 | Bread stuffing made with egg                                                                 | 8000_Mixed | 25 | 27 | -2 | 4 | 2.5 | C |
| 75607040 | Mushroom soup, with meat broth, prepared with water                                          | 8000_Mixed | 25 | 27 | -2 | 4 | 3   | C |

|          |                                                                                                                                          |            |    |    |    |   |     |   |
|----------|------------------------------------------------------------------------------------------------------------------------------------------|------------|----|----|----|---|-----|---|
| 27510440 | Bacon cheeseburger, 1/4 lb meat, with mayonnaise or salad dressing, and tomato and/or catsup, on bun                                     | 8000_Mixed | 25 | 26 | -1 | 4 | 2   | D |
| 28110350 | Salisbury steak with gravy, potatoes, vegetable, dessert, frozen meal                                                                    | 8000_Mixed | 25 | 26 | -1 | 4 | 3.5 | C |
| 28110500 | Beef, sliced, with gravy, barley and wild rice, vegetables (diet frozen meal)                                                            | 8000_Mixed | 25 | 26 | -1 | 4 | 4   | B |
| 28143020 | Chicken and vegetable entree with rice, diet frozen meal                                                                                 | 8000_Mixed | 25 | 26 | -1 | 4 | 3.5 | C |
| 58106660 | Pizza with extra meat, thick crust                                                                                                       | 8000_Mixed | 25 | 26 | -1 | 4 | 2   | D |
| 74602050 | Tomato soup, instant type, prepared with water                                                                                           | 8000_Mixed | 25 | 26 | -1 | 4 | 3   | C |
| 27510171 | Whopper Jr with cheese (Burger King)                                                                                                     | 8000_Mixed | 25 | 25 | 0  | 4 | 3   | D |
| 27510257 | Double cheeseburger, on white bun, 2 medium patties                                                                                      | 8000_Mixed | 25 | 25 | 0  | 4 | 2   | D |
| 27510265 | Double cheeseburger, (2 patties, 1 oz each), plain, on miniature bun                                                                     | 8000_Mixed | 25 | 25 | 0  | 4 | 2   | D |
| 27510401 | Double cheeseburger, from fast food, 2 medium patties                                                                                    | 8000_Mixed | 25 | 25 | 0  | 4 | 2   | D |
| 27520150 | Bacon, lettuce, and tomato sandwich with spread                                                                                          | 8000_Mixed | 25 | 25 | 0  | 4 | 3   | C |
| 27564242 | Frankfurter or hot dog sandwich, chicken and/or turkey, plain, on whole wheat bun                                                        | 8000_Mixed | 25 | 25 | 0  | 4 | 3   | D |
| 27564280 | Frankfurter or hot dog sandwich, chicken and/or turkey, plain, on whole grain white bread                                                | 8000_Mixed | 25 | 25 | 0  | 4 | 3.5 | D |
| 27564350 | Frankfurter or hot dog sandwich, reduced fat or light, plain, on multigrain bread                                                        | 8000_Mixed | 25 | 25 | 0  | 4 | 3.5 | D |
| 27564363 | Frankfurter or hot dog sandwich, fat free, plain, on whole grain white bun                                                               | 8000_Mixed | 25 | 25 | 0  | 4 | 3.5 | D |
| 28110370 | Salisbury steak with gravy, macaroni and cheese, vegetable, frozen meal                                                                  | 8000_Mixed | 25 | 25 | 0  | 4 | 3   | C |
| 28143040 | Chicken chow mein with rice, diet frozen meal                                                                                            | 8000_Mixed | 25 | 25 | 0  | 4 | 3.5 | C |
| 58100110 | Burrito with beef and beans                                                                                                              | 8000_Mixed | 25 | 25 | 0  | 4 | 3.5 | D |
| 58106655 | Pizza with extra meat, medium crust                                                                                                      | 8000_Mixed | 25 | 25 | 0  | 4 | 2   | D |
| 58145119 | Macaroni or noodles with cheese, made from reduced fat packaged mix                                                                      | 8000_Mixed | 25 | 25 | 0  | 4 | 3.5 | C |
| 58406010 | Turkey noodle soup                                                                                                                       | 8000_Mixed | 25 | 25 | 0  | 4 | 3   | C |
| 14640008 | Cheese sandwich, Cheddar cheese, on white bread, no spread                                                                               | 8000_Mixed | 25 | 24 | 1  | 3 | 1.5 | D |
| 27510431 | Double bacon cheeseburger, 2 small patties, with condiments, on bun, from fast food / restaurant (Burger King Bacon Double Cheeseburger) | 8000_Mixed | 25 | 24 | 1  | 4 | 2   | D |
| 27510480 | Cheeseburger (hamburger with cheese sauce), 1/4 lb meat, with grilled onions, on rye bun                                                 | 8000_Mixed | 25 | 24 | 1  | 4 | 3.5 | C |
| 58104760 | Quesadilla with vegetables and meat                                                                                                      | 8000_Mixed | 25 | 24 | 1  | 3 | 2   | D |
| 58104770 | Quesadilla with vegetables and chicken                                                                                                   | 8000_Mixed | 25 | 24 | 1  | 3 | 2   | D |
| 58400000 | Soup, NFS                                                                                                                                | 8000_Mixed | 25 | 24 | 1  | 4 | 3   | C |
| 28110520 | Beef, sliced, with gravy, potatoes, vegetable, dessert (frozen meal)                                                                     | 8000_Mixed | 25 | 23 | 2  | 4 | 3.5 | C |
| 58403010 | Chicken or turkey noodle soup, canned or ready-to-serve                                                                                  | 8000_Mixed | 25 | 23 | 2  | 4 | 3   | C |
| 27220120 | Sausage and rice with tomato-based sauce                                                                                                 | 8000_Mixed | 25 | 16 | 9  | 2 | 2.5 | C |
| 58156310 | Rice with Spanish sausage, Puerto Rican style                                                                                            | 8000_Mixed | 25 | 16 | 9  | 2 | 1.5 | D |
| 27510340 | Double cheeseburger (2 patties), with mayonnaise or salad dressing and tomatoes and/or catsup, on bun                                    | 8000_Mixed | 24 | 27 | -3 | 4 | 2   | D |
| 27513040 | Roast beef submarine sandwich, with lettuce, tomato and spread                                                                           | 8000_Mixed | 24 | 27 | -3 | 4 | 3.5 | C |

|          |                                                                                                                     |            |    |    |    |   |     |   |
|----------|---------------------------------------------------------------------------------------------------------------------|------------|----|----|----|---|-----|---|
| 27517010 | Wrap sandwich filled with beef patty, cheese, tomato and/or catsup, and spread and/or sauce                         | 8000_Mixed | 24 | 27 | -3 | 4 | 2   | D |
| 58106205 | Pizza, cheese, from frozen, thick crust                                                                             | 8000_Mixed | 24 | 27 | -3 | 4 | 2.5 | D |
| 58106230 | Pizza, cheese, from restaurant or fast food, thick crust                                                            | 8000_Mixed | 24 | 27 | -3 | 4 | 2.5 | D |
| 58106359 | Pizza, cheese, with fruit, medium crust                                                                             | 8000_Mixed | 24 | 27 | -3 | 4 | 3.5 | D |
| 58106550 | Pizza with pepperoni, from restaurant or fast food, thin crust                                                      | 8000_Mixed | 24 | 27 | -3 | 4 | 1.5 | E |
| 14640062 | Cheese sandwich, reduced fat American cheese, on white bread, with butter                                           | 8000_Mixed | 24 | 26 | -2 | 4 | 1.5 | E |
| 27510000 | Beef sandwich, NFS                                                                                                  | 8000_Mixed | 24 | 26 | -2 | 4 | 3.5 | C |
| 27510175 | Cheeseburger, 1 small patty, with condiments, on bun, from fast food / restaurant (Wendy's Jr. Cheeseburger Deluxe) | 8000_Mixed | 24 | 26 | -2 | 4 | 3   | D |
| 27510389 | Big Mac (McDonalds)                                                                                                 | 8000_Mixed | 24 | 26 | -2 | 4 | 2   | D |
| 27510425 | Double bacon cheeseburger (2 patties, 1/4 lb meat each), with mayonnaise or salad dressing, on bun                  | 8000_Mixed | 24 | 26 | -2 | 4 | 1.5 | D |
| 27513041 | Roast beef submarine sandwich, with cheese, lettuce, tomato and spread                                              | 8000_Mixed | 24 | 26 | -2 | 4 | 3.5 | C |
| 27520120 | Bacon and cheese sandwich, with spread                                                                              | 8000_Mixed | 24 | 26 | -2 | 4 | 1.5 | E |
| 27540175 | Chicken fillet sandwich, fried, on white bun                                                                        | 8000_Mixed | 24 | 26 | -2 | 4 | 3.5 | D |
| 28340690 | Chicken or turkey vegetable soup with potato and cheese, chunky style, canned or ready-to-serve                     | 8000_Mixed | 24 | 26 | -2 | 4 | 3   | C |
| 58106200 | Pizza, cheese, from frozen, thin crust                                                                              | 8000_Mixed | 24 | 26 | -2 | 4 | 2.5 | D |
| 58106325 | Pizza, cheese, with vegetables, from restaurant or fast food, medium crust                                          | 8000_Mixed | 24 | 26 | -2 | 4 | 3   | D |
| 58106560 | Pizza with pepperoni, from restaurant or fast food, thick crust                                                     | 8000_Mixed | 24 | 26 | -2 | 4 | 2   | D |
| 58112110 | Dim sum, meat filled (egg roll-type)                                                                                | 8000_Mixed | 24 | 26 | -2 | 4 | 3   | D |
| 58306070 | Cheese enchilada, frozen meal                                                                                       | 8000_Mixed | 24 | 26 | -2 | 4 | 2.5 | D |
| 58304300 | Cannelloni, cheese-filled, with tomato sauce, diet frozen meal                                                      | 8000_Mixed | 24 | 25 | -1 | 4 | 3   | C |
| 58306020 | Beef enchilada, chili gravy, rice, refried beans, frozen meal                                                       | 8000_Mixed | 24 | 25 | -1 | 4 | 3.5 | C |
| 14640100 | Grilled cheese sandwich, NFS                                                                                        | 8000_Mixed | 24 | 24 | 0  | 4 | 1   | E |
| 14640105 | Grilled cheese sandwich, American cheese, on white bread                                                            | 8000_Mixed | 24 | 24 | 0  | 4 | 1   | E |
| 27510262 | Double cheeseburger, on white bun, 2 large patties                                                                  | 8000_Mixed | 24 | 24 | 0  | 4 | 2   | D |
| 27510360 | Bacon cheeseburger, with mayonnaise or salad dressing, tomato and/or catsup, on bun                                 | 8000_Mixed | 24 | 24 | 0  | 4 | 2   | D |
| 27510405 | Double cheeseburger, from fast food, 2 large patties                                                                | 8000_Mixed | 24 | 24 | 0  | 4 | 2   | D |
| 27564270 | Frankfurter or hot dog sandwich, chicken and/or turkey, plain, on whole wheat bread                                 | 8000_Mixed | 24 | 24 | 0  | 4 | 2.5 | D |
| 28330110 | Scotch broth (lamb, vegetables, and barley)                                                                         | 8000_Mixed | 24 | 24 | 0  | 4 | 3   | C |
| 27510245 | Cheeseburger, on white bun, 1 large patty                                                                           | 8000_Mixed | 24 | 23 | 1  | 4 | 2   | D |
| 27510261 | Cheeseburger, from fast food, 1 large patty                                                                         | 8000_Mixed | 24 | 23 | 1  | 4 | 2   | D |
| 28101000 | Frozen dinner, NFS                                                                                                  | 8000_Mixed | 24 | 23 | 1  | 4 | 3.5 | C |
| 28110000 | Beef dinner, NFS, frozen meal                                                                                       | 8000_Mixed | 24 | 23 | 1  | 4 | 3.5 | C |
| 28110200 | Sirloin, chopped, dinner, NFS (frozen meal)                                                                         | 8000_Mixed | 24 | 23 | 1  | 4 | 3   | C |
| 28110300 | Salisbury steak dinner, NFS, frozen meal                                                                            | 8000_Mixed | 24 | 23 | 1  | 4 | 3.5 | C |
| 28110310 | Salisbury steak with gravy, potatoes, vegetable, frozen meal                                                        | 8000_Mixed | 24 | 23 | 1  | 4 | 3.5 | C |

|          |                                                                                                |            |    |    |    |   |     |   |
|----------|------------------------------------------------------------------------------------------------|------------|----|----|----|---|-----|---|
| 58104720 | Quesadilla, just cheese, from fast food                                                        | 8000_Mixed | 24 | 23 | 1  | 3 | 1.5 | E |
| 58104750 | Quesadilla with vegetables                                                                     | 8000_Mixed | 24 | 23 | 1  | 4 | 2   | D |
| 58106640 | Pizza with extra meat, NS as to type of crust                                                  | 8000_Mixed | 24 | 23 | 1  | 4 | 2   | D |
| 58404040 | Chicken or turkey rice soup, reduced sodium, canned, prepared with water or ready-to-serve     | 8000_Mixed | 24 | 23 | 1  | 4 | 3.5 | B |
| 58101733 | Taco or tostada with meat and beans, from fast food                                            | 8000_Mixed | 24 | 22 | 2  | 4 | 3.5 | C |
| 58146443 | Pasta with cream sauce and seafood, ready-to-heat                                              | 8000_Mixed | 24 | 22 | 2  | 4 | 3   | C |
| 58304020 | Spaghetti and meatballs with tomato sauce, sliced apples, bread, frozen meal                   | 8000_Mixed | 24 | 22 | 2  | 4 | 3   | C |
| 73210110 | Pumpkin fritters, Puerto Rican style                                                           | 8000_Mixed | 24 | 22 | 2  | 2 | 2.5 | D |
| 58107224 | White pizza, cheese, with meat, thick crust                                                    | 8000_Mixed | 24 | 21 | 3  | 4 | 2   | D |
| 32202000 | Egg, cheese, ham, and bacon on bun                                                             | 8000_Mixed | 24 | 17 | 7  | 3 | 2   | D |
| 27220030 | Ham and rice with mushroom sauce                                                               | 8000_Mixed | 24 | 16 | 8  | 2 | 3   | C |
| 27220170 | Sausage and rice with cheese sauce                                                             | 8000_Mixed | 24 | 15 | 9  | 3 | 3   | C |
| 27320020 | Ham pot pie                                                                                    | 8000_Mixed | 24 | 15 | 9  | 3 | 3   | D |
| 58122250 | Kishke, stuffed derma                                                                          | 8000_Mixed | 24 | 14 | 10 | 2 | 1   | E |
| 14640014 | Cheese sandwich, reduced fat American cheese, on white bread, no spread                        | 8000_Mixed | 23 | 26 | -3 | 4 | 2   | D |
| 27510250 | Cheeseburger, 1/4 lb meat, with mayonnaise or salad dressing, on bun                           | 8000_Mixed | 23 | 26 | -3 | 4 | 2   | D |
| 27510280 | Double cheeseburger (2 patties), with mayonnaise or salad dressing, on bun                     | 8000_Mixed | 23 | 26 | -3 | 4 | 2   | D |
| 27510350 | Cheeseburger, 1/4 lb meat, with mayonnaise or salad dressing, and tomato and/or catsup, on bun | 8000_Mixed | 23 | 26 | -3 | 4 | 2   | D |
| 27540132 | Chicken fillet sandwich, NFS                                                                   | 8000_Mixed | 23 | 26 | -3 | 4 | 3   | D |
| 58106516 | Pizza with pepperoni, from frozen, thick crust                                                 | 8000_Mixed | 23 | 26 | -3 | 4 | 2.5 | D |
| 14640155 | Grilled cheese sandwich, reduced fat American cheese, on white bread                           | 8000_Mixed | 23 | 25 | -2 | 4 | 1.5 | E |
| 27510386 | Double cheeseburger (Burger King)                                                              | 8000_Mixed | 23 | 25 | -2 | 4 | 2   | D |
| 27510670 | Double hamburger (2 patties), with mayonnaise or salad dressing and tomatoes, on bun           | 8000_Mixed | 23 | 25 | -2 | 4 | 3   | D |
| 27540140 | Chicken fillet, breaded, fried, sandwich                                                       | 8000_Mixed | 23 | 25 | -2 | 4 | 2   | D |
| 58106514 | Pizza with pepperoni, from frozen, medium crust                                                | 8000_Mixed | 23 | 25 | -2 | 4 | 2   | D |
| 58106540 | Pizza with pepperoni, from restaurant or fast food, NS as to type of crust                     | 8000_Mixed | 23 | 25 | -2 | 4 | 2   | D |
| 58106555 | Pizza with pepperoni, from restaurant or fast food, medium crust                               | 8000_Mixed | 23 | 25 | -2 | 4 | 2   | D |
| 58106606 | Pizza with meat other than pepperoni, from frozen, thick crust                                 | 8000_Mixed | 23 | 25 | -2 | 4 | 2.5 | D |
| 58107205 | White pizza, cheese, thin crust                                                                | 8000_Mixed | 23 | 25 | -2 | 4 | 2   | D |
| 28110620 | Beef short ribs, boneless, with barbecue sauce, potatoes, vegetable, frozen meal               | 8000_Mixed | 23 | 24 | -1 | 4 | 4   | B |
| 58106733 | Pizza with extra meat and extra vegetables, prepared from frozen, thin crust                   | 8000_Mixed | 23 | 24 | -1 | 4 | 3   | D |
| 27510235 | Cheeseburger submarine sandwich with lettuce, tomato and spread                                | 8000_Mixed | 23 | 23 | 0  | 4 | 3.5 | C |
| 27510400 | Bacon cheeseburger, 1/4 lb meat, with tomato and/or catsup, on bun                             | 8000_Mixed | 23 | 23 | 0  | 4 | 1.5 | D |

|          |                                                                                                                          |            |    |    |    |   |     |   |
|----------|--------------------------------------------------------------------------------------------------------------------------|------------|----|----|----|---|-----|---|
| 27515020 | Steak and cheese submarine sandwich, with lettuce and tomato                                                             | 8000_Mixed | 23 | 23 | 0  | 4 | 3.5 | C |
| 27518000 | Wrap sandwich filled with beef patty, bacon, cheese, tomato and/or catsup, and spread and/or sauce                       | 8000_Mixed | 23 | 23 | 0  | 4 | 1.5 | D |
| 27564303 | Frankfurter or hot dog sandwich, reduced fat or light, plain, on whole grain white bun                                   | 8000_Mixed | 23 | 23 | 0  | 4 | 3   | D |
| 28141010 | Chicken, fried, with potatoes, vegetable, dessert, frozen meal, large meat portion                                       | 8000_Mixed | 23 | 23 | 0  | 4 | 3   | C |
| 28317010 | Beef stroganoff soup, chunky style, home recipe, canned or ready-to-serve                                                | 8000_Mixed | 23 | 23 | 0  | 4 | 3   | C |
| 58145113 | Macaroni or noodles with cheese, canned                                                                                  | 8000_Mixed | 23 | 23 | 0  | 4 | 3.5 | C |
| 58310410 | Sausage rice links and whole wheat pancakes (frozen meal)                                                                | 8000_Mixed | 23 | 23 | 0  | 4 | 2   | D |
| 27510254 | Double cheeseburger, on white bun, 2 small patties                                                                       | 8000_Mixed | 23 | 22 | 1  | 4 | 2   | D |
| 27510281 | Bacon cheeseburger, 1 small patty, with condiments, on bun, from fast food / restaurant (Wendy's Jr. Bacon Cheeseburger) | 8000_Mixed | 23 | 22 | 1  | 4 | 2   | D |
| 27540361 | Turkey and bacon submarine sandwich, with cheese, lettuce, tomato and spread                                             | 8000_Mixed | 23 | 22 | 1  | 4 | 3.5 | C |
| 28110220 | Sirloin, chopped, with gravy, mashed potatoes, vegetable, frozen meal                                                    | 8000_Mixed | 23 | 22 | 1  | 4 | 3   | C |
| 58132713 | Pasta with tomato sauce and frankfurters or hot dogs, canned                                                             | 8000_Mixed | 23 | 22 | 1  | 4 | 3.5 | B |
| 27510950 | Reuben sandwich, corned beef sandwich with sauerkraut and cheese, with spread                                            | 8000_Mixed | 23 | 21 | 2  | 4 | 2   | D |
| 58130013 | Lasagna with meat, canned                                                                                                | 8000_Mixed | 23 | 21 | 2  | 4 | 3.5 | C |
| 58131323 | Ravioli, meat-filled, with tomato sauce or meat sauce, canned                                                            | 8000_Mixed | 23 | 21 | 2  | 4 | 3.5 | C |
| 27520510 | Pork barbecue sandwich or Sloppy Joe, on bun                                                                             | 8000_Mixed | 23 | 19 | 4  | 3 | 3   | D |
| 58145150 | Macaroni or noodles with cheese and pork or ham                                                                          | 8000_Mixed | 23 | 19 | 4  | 4 | 3   | D |
| 27541000 | Turkey, ham, and roast beef club sandwich, with lettuce, tomato and spread                                               | 8000_Mixed | 23 | 18 | 5  | 3 | 3   | C |
| 27120120 | Sausage gravy                                                                                                            | 8000_Mixed | 23 | 15 | 8  | 3 | 2.5 | D |
| 58103210 | Tamale, meatless, with sauce, Puerto Rican or Caribbean style                                                            | 8000_Mixed | 23 | 14 | 9  | 2 | 0.5 | E |
| 58156210 | Rice with vienna sausage, Puerto Rican style                                                                             | 8000_Mixed | 23 | 14 | 9  | 2 | 1.5 | D |
| 27418310 | Corned beef with tomato sauce and onion, Puerto Rican style                                                              | 8000_Mixed | 23 | 13 | 10 | 3 | 2   | D |
| 58151400 | Sushi, topped with crab                                                                                                  | 8000_Mixed | 23 | 12 | 11 | 2 | 3   | C |
| 27135040 | Veal with butter sauce                                                                                                   | 8000_Mixed | 23 | 10 | 13 | 1 | 3   | D |
| 58106210 | Pizza, cheese, from restaurant or fast food, NS as to type of crust                                                      | 8000_Mixed | 22 | 25 | -3 | 4 | 2.5 | D |
| 58106225 | Pizza, cheese, from restaurant or fast food, medium crust                                                                | 8000_Mixed | 22 | 25 | -3 | 4 | 2.5 | D |
| 27510230 | Cheeseburger, with mayonnaise or salad dressing, and tomato and/or catsup, on bun                                        | 8000_Mixed | 22 | 24 | -2 | 4 | 3   | D |
| 27510231 | Whopper with cheese (Burger King)                                                                                        | 8000_Mixed | 22 | 24 | -2 | 4 | 2   | D |
| 27510233 | Cheeseburger, 1 medium patty, with condiments, on bun, from fast food / restaurant (Wendy's 1/4 lb Single with cheese)   | 8000_Mixed | 22 | 24 | -2 | 4 | 2   | D |
| 27520166 | Bacon, breaded fried chicken fillet, and tomato club sandwich with cheese, lettuce and spread                            | 8000_Mixed | 22 | 24 | -2 | 4 | 3   | D |
| 28110390 | Salisbury steak, potatoes, vegetable, dessert, diet frozen meal                                                          | 8000_Mixed | 22 | 24 | -2 | 4 | 3.5 | B |
| 28355410 | Shrimp soup, cream of, NS as to prepared with milk or water                                                              | 8000_Mixed | 22 | 24 | -2 | 4 | 3   | C |
| 28355420 | Shrimp soup, cream of, prepared with milk                                                                                | 8000_Mixed | 22 | 24 | -2 | 4 | 3   | C |

|          |                                                                                         |            |    |    |    |   |     |   |
|----------|-----------------------------------------------------------------------------------------|------------|----|----|----|---|-----|---|
| 58100125 | Burrito with meat and beans, from fast food                                             | 8000_Mixed | 22 | 24 | -2 | 4 | 3.5 | C |
| 58106240 | Pizza, extra cheese, NS as to type of crust                                             | 8000_Mixed | 22 | 24 | -2 | 4 | 2.5 | D |
| 58106255 | Pizza, extra cheese, regular crust                                                      | 8000_Mixed | 22 | 24 | -2 | 4 | 2.5 | D |
| 58106310 | Pizza, cheese, with vegetables, NS as to type of crust                                  | 8000_Mixed | 22 | 24 | -2 | 4 | 3   | D |
| 58106512 | Pizza with pepperoni, from frozen, thin crust                                           | 8000_Mixed | 22 | 24 | -2 | 4 | 2.5 | D |
| 58106604 | Pizza with meat other than pepperoni, from frozen, medium crust                         | 8000_Mixed | 22 | 24 | -2 | 4 | 2.5 | D |
| 58106760 | Pizza with meat and fruit, thick crust                                                  | 8000_Mixed | 22 | 24 | -2 | 4 | 3   | D |
| 75601020 | Asparagus soup, cream of, prepared with water                                           | 8000_Mixed | 22 | 24 | -2 | 4 | 3   | C |
| 75649050 | Vegetable soup, made from dry mix                                                       | 8000_Mixed | 22 | 24 | -2 | 4 | 3   | C |
| 27510140 | Cheeseburger slider, from fast food                                                     | 8000_Mixed | 22 | 23 | -1 | 4 | 2   | D |
| 27510260 | Cheeseburger, 1/4 lb meat, with mushrooms in sauce, on bun                              | 8000_Mixed | 22 | 23 | -1 | 4 | 3   | D |
| 27510320 | Cheeseburger, 1/4 lb meat, with tomato and/or catsup, on bun                            | 8000_Mixed | 22 | 23 | -1 | 4 | 2   | D |
| 58106602 | Pizza with meat other than pepperoni, from frozen, thin crust                           | 8000_Mixed | 22 | 23 | -1 | 4 | 2.5 | D |
| 58106750 | Pizza with meat and fruit, thin crust                                                   | 8000_Mixed | 22 | 23 | -1 | 4 | 2   | D |
| 27510371 | Double cheeseburger, from fast food, 2 small patties                                    | 8000_Mixed | 22 | 22 | 0  | 4 | 2   | D |
| 27510390 | Double bacon cheeseburger (2 patties, 1/4 lb meat each), on bun                         | 8000_Mixed | 22 | 22 | 0  | 4 | 2   | D |
| 27510667 | Double hamburger, 2 small patties, with condiments, on bun, from fast food / restaurant | 8000_Mixed | 22 | 22 | 0  | 4 | 3.5 | C |
| 27564122 | Frankfurter or hot dog sandwich, beef and pork, plain, on whole wheat bun               | 8000_Mixed | 22 | 22 | 0  | 4 | 2   | D |
| 28145010 | Turkey with dressing, gravy, potato (frozen meal)                                       | 8000_Mixed | 22 | 22 | 0  | 4 | 3   | C |
| 27564502 | Frankfurter or hot dog sandwich, with meatless chili, on whole wheat bun                | 8000_Mixed | 22 | 21 | 1  | 4 | 3   | D |
| 28141630 | Chicken cordon bleu with vegetable, rice (frozen meal)                                  | 8000_Mixed | 22 | 21 | 1  | 4 | 3.5 | B |
| 28345040 | Chicken or turkey soup, cream of, canned, reduced sodium, undiluted                     | 8000_Mixed | 22 | 21 | 1  | 4 | 3.5 | C |
| 58104710 | Quesadilla, just cheese, meatless                                                       | 8000_Mixed | 22 | 21 | 1  | 4 | 1.5 | E |
| 58162310 | Rice pilaf                                                                              | 8000_Mixed | 22 | 21 | 1  | 4 | 3   | C |
| 58407000 | Instant soup, NFS                                                                       | 8000_Mixed | 22 | 21 | 1  | 4 | 3.5 | B |
| 27112010 | Salisbury steak with gravy                                                              | 8000_Mixed | 22 | 20 | 2  | 4 | 3   | C |
| 27564160 | Frankfurter or hot dog sandwich, beef and pork, plain, on whole grain white bread       | 8000_Mixed | 22 | 20 | 2  | 4 | 2   | D |
| 28140250 | Chicken, boneless, with gravy, dressing, rice, vegetable, dessert, frozen meal          | 8000_Mixed | 22 | 20 | 2  | 4 | 3.5 | C |
| 27564540 | Frankfurter or hot dog sandwich, with meatless chili, on whole grain white bread        | 8000_Mixed | 22 | 19 | 3  | 4 | 3   | D |
| 28143210 | Chicken in orange sauce with almond rice, diet frozen meal                              | 8000_Mixed | 22 | 19 | 3  | 4 | 4   | B |
| 58104800 | Taquito or flauta with cheese                                                           | 8000_Mixed | 22 | 19 | 3  | 4 | 3.5 | C |
| 58100560 | Enchilada with ham and cheese, no beans                                                 | 8000_Mixed | 22 | 18 | 4  | 4 | 3.5 | C |
| 58163110 | Rice with gravy                                                                         | 8000_Mixed | 22 | 10 | 12 | 1 | 3   | C |
| 58151100 | Sushi, NFS                                                                              | 8000_Mixed | 22 | 9  | 13 | 2 | 3   | C |
| 58151180 | Sushi roll, California                                                                  | 8000_Mixed | 22 | 9  | 13 | 2 | 3   | C |
| 27510220 | Cheeseburger, with mayonnaise or salad dressing, on bun                                 | 8000_Mixed | 21 | 24 | -3 | 4 | 2   | D |

|          |                                                                                                    |            |    |    |    |   |     |   |
|----------|----------------------------------------------------------------------------------------------------|------------|----|----|----|---|-----|---|
| 58106233 | Pizza, cheese, stuffed crust                                                                       | 8000_Mixed | 21 | 24 | -3 | 4 | 2   | D |
| 27510145 | Cheeseburger, 1 miniature patty, with condiments, on miniature bun, from fast food / restaurant    | 8000_Mixed | 21 | 23 | -2 | 4 | 2   | D |
| 27510550 | Double hamburger (2 patties), with mayonnaise or salad dressing and tomatoes, on double-decker bun | 8000_Mixed | 21 | 23 | -2 | 4 | 3   | D |
| 27510660 | Double hamburger (2 patties), with mayonnaise or salad dressing, on bun                            | 8000_Mixed | 21 | 23 | -2 | 4 | 3   | D |
| 27540151 | Chicken fillet, breaded, fried, sandwich with cheese, lettuce, tomato and spread                   | 8000_Mixed | 21 | 23 | -2 | 4 | 2   | D |
| 58106620 | Pizza with meat other than pepperoni, from restaurant or fast food, thin crust                     | 8000_Mixed | 21 | 23 | -2 | 4 | 1.5 | E |
| 58106702 | Pizza with meat and vegetables, from frozen, medium crust                                          | 8000_Mixed | 21 | 23 | -2 | 4 | 2   | D |
| 27510195 | Cheeseburger, on white bun, 1 small patty                                                          | 8000_Mixed | 21 | 22 | -1 | 4 | 2   | D |
| 27510240 | Cheeseburger, 1/4 lb meat, plain, on bun                                                           | 8000_Mixed | 21 | 22 | -1 | 4 | 2   | D |
| 27510312 | Bacon cheeseburger, 1 medium patty, with condiments, on bun, from fast food / restaurant           | 8000_Mixed | 21 | 22 | -1 | 4 | 1.5 | D |
| 27510330 | Double cheeseburger (2 patties), with tomato and/or catsup, on bun                                 | 8000_Mixed | 21 | 22 | -1 | 4 | 2   | D |
| 27510376 | Double cheeseburger, 2 small patties, with condiments, on bun, from fast food / restaurant         | 8000_Mixed | 21 | 22 | -1 | 4 | 2   | D |
| 27510570 | Hamburger, 2-1/2 oz meat, with mayonnaise or salad dressing and tomatoes, on bun                   | 8000_Mixed | 21 | 22 | -1 | 4 | 3.5 | C |
| 27510630 | Hamburger, 1/4 lb meat, with mayonnaise or salad dressing, on bun                                  | 8000_Mixed | 21 | 22 | -1 | 4 | 3   | D |
| 58126150 | Turnover, meat- and cheese-filled, tomato-based sauce                                              | 8000_Mixed | 21 | 22 | -1 | 4 | 3   | D |
| 27510155 | Cheeseburger, NFS                                                                                  | 8000_Mixed | 21 | 21 | 0  | 4 | 2   | D |
| 27510191 | Cheeseburger slider                                                                                | 8000_Mixed | 21 | 21 | 0  | 4 | 2   | D |
| 27510215 | Cheeseburger, from fast food, 1 medium patty                                                       | 8000_Mixed | 21 | 21 | 0  | 4 | 2   | D |
| 27510225 | Cheeseburger, 1 medium patty, with condiments, on bun, from fast food / restaurant                 | 8000_Mixed | 21 | 21 | 0  | 4 | 2   | D |
| 27510232 | Quarter Pounder with cheese (McDonalds)                                                            | 8000_Mixed | 21 | 21 | 0  | 4 | 2   | D |
| 27510241 | Cheeseburger, on white bun, 1 medium patty                                                         | 8000_Mixed | 21 | 21 | 0  | 4 | 2   | D |
| 27510385 | Double bacon cheeseburger (2 patties), with tomato and/or catsup, on bun                           | 8000_Mixed | 21 | 21 | 0  | 4 | 2   | D |
| 27510475 | Double bacon cheeseburger, 2 large patties, with condiments, on bun, from fast food / restaurant   | 8000_Mixed | 21 | 21 | 0  | 4 | 1.5 | E |
| 27510486 | Triple cheeseburger, 3 medium patties, with condiments, on bun, from fast food / restaurant        | 8000_Mixed | 21 | 21 | 0  | 4 | 2   | D |
| 28110340 | Salisbury steak with gravy, potatoes, vegetable, soup or macaroni and cheese, dessert, frozen meal | 8000_Mixed | 21 | 21 | 0  | 4 | 3.5 | C |
| 52204000 | Cornbread stuffing                                                                                 | 8000_Mixed | 21 | 21 | 0  | 4 | 3   | C |
| 27510305 | Bacon cheeseburger, 1 medium patty, plain, on bun, from fast food / restaurant                     | 8000_Mixed | 21 | 20 | 1  | 4 | 1.5 | E |
| 27510410 | Chiliburger, on bun                                                                                | 8000_Mixed | 21 | 20 | 1  | 4 | 3.5 | D |
| 27510658 | Double hamburger, on white bun, 2 large patties                                                    | 8000_Mixed | 21 | 20 | 1  | 4 | 2   | D |
| 27510675 | Double hamburger, from fast food, 2 large patties                                                  | 8000_Mixed | 21 | 20 | 1  | 4 | 2   | D |
| 28140810 | Chicken, fried, with potatoes, vegetable, dessert, frozen meal                                     | 8000_Mixed | 21 | 20 | 1  | 4 | 3   | D |
| 28141640 | Chicken kiev with rice-vegetable mixture (frozen meal)                                             | 8000_Mixed | 21 | 20 | 1  | 4 | 3   | C |
| 58101323 | Taco or tostada with meat, from fast food                                                          | 8000_Mixed | 21 | 20 | 1  | 4 | 3.5 | C |



|          |                                                                                                                                             |            |    |    |    |   |     |   |
|----------|---------------------------------------------------------------------------------------------------------------------------------------------|------------|----|----|----|---|-----|---|
| 58127500 | Vegetable submarine sandwich, with fat free spread                                                                                          | 8000_Mixed | 21 | 20 | 1  | 4 | 3.5 | C |
| 27564220 | Frankfurter or hot dog sandwich, meat and poultry, plain, on whole grain white bread                                                        | 8000_Mixed | 21 | 19 | 2  | 4 | 2   | D |
| 58400200 | Rice soup, NFS                                                                                                                              | 8000_Mixed | 21 | 19 | 2  | 4 | 3   | C |
| 58404010 | Chicken or turkey rice soup, canned, or ready-to-serve                                                                                      | 8000_Mixed | 21 | 19 | 2  | 4 | 3   | C |
| 32202130 | Egg and steak on biscuit                                                                                                                    | 8000_Mixed | 21 | 18 | 3  | 3 | 1.5 | E |
| 35003000 | Scrambled eggs, sausage, pancakes (frozen meal)                                                                                             | 8000_Mixed | 21 | 16 | 5  | 4 | 3   | C |
| 27520420 | Midnight sandwich, with spread                                                                                                              | 8000_Mixed | 21 | 14 | 7  | 3 | 3.5 | D |
| 55610200 | Dumpling, fried, Puerto Rican style                                                                                                         | 8000_Mixed | 21 | 14 | 7  | 3 | 2   | D |
| 58164540 | Rice, white, with gravy, no added fat                                                                                                       | 8000_Mixed | 21 | 9  | 12 | 1 | 3   | C |
| 27540150 | Chicken fillet, breaded, fried, sandwich with lettuce, tomato and spread                                                                    | 8000_Mixed | 20 | 23 | -3 | 4 | 3   | D |
| 27540147 | Chicken fillet sandwich, fried, from fast food, with cheese                                                                                 | 8000_Mixed | 20 | 22 | -2 | 4 | 2   | D |
| 27540176 | Chicken fillet sandwich, fried, on white bun; with cheese                                                                                   | 8000_Mixed | 20 | 22 | -2 | 4 | 2   | D |
| 27540180 | Chicken patty sandwich or biscuit                                                                                                           | 8000_Mixed | 20 | 22 | -2 | 4 | 2   | D |
| 28140740 | Chicken patty or nuggets, boneless, breaded, with pasta and tomato sauce, fruit, dessert, frozen meal                                       | 8000_Mixed | 20 | 22 | -2 | 4 | 3   | D |
| 58106700 | Pizza with meat and vegetables, from frozen, thin crust                                                                                     | 8000_Mixed | 20 | 22 | -2 | 4 | 2   | D |
| 75607090 | Mushroom soup, cream of, canned, reduced sodium, NS as to made with milk or water                                                           | 8000_Mixed | 20 | 22 | -2 | 4 | 3.5 | B |
| 75607140 | Mushroom soup, cream of, canned, reduced sodium, prepared with water                                                                        | 8000_Mixed | 20 | 22 | -2 | 4 | 3.5 | B |
| 75607150 | Mushroom soup, cream of, canned, reduced sodium, undiluted                                                                                  | 8000_Mixed | 20 | 22 | -2 | 4 | 3   | C |
| 27510160 | Cheeseburger, from fast food, 1 small patty                                                                                                 | 8000_Mixed | 20 | 21 | -1 | 4 | 2   | D |
| 27510387 | Double cheeseburger (McDonalds)                                                                                                             | 8000_Mixed | 20 | 21 | -1 | 4 | 2   | D |
| 27510388 | McDouble (McDonalds)                                                                                                                        | 8000_Mixed | 20 | 21 | -1 | 4 | 2   | D |
| 27510391 | Double cheeseburger, 2 small patties, with condiments, on bun, from fast food / restaurant (Wendy's Double Stack)                           | 8000_Mixed | 20 | 21 | -1 | 4 | 2   | D |
| 27510520 | Hamburger, with mayonnaise or salad dressing, and tomato and/or catsup, on bun                                                              | 8000_Mixed | 20 | 21 | -1 | 4 | 3.5 | C |
| 27510590 | Hamburger, with mayonnaise or salad dressing, on bun                                                                                        | 8000_Mixed | 20 | 21 | -1 | 4 | 3   | D |
| 27510700 | Meatball and spaghetti sauce submarine sandwich                                                                                             | 8000_Mixed | 20 | 21 | -1 | 4 | 3.5 | D |
| 58101457 | Soft taco with chicken, from fast food                                                                                                      | 8000_Mixed | 20 | 21 | -1 | 4 | 3.5 | D |
| 58106725 | Pizza with meat and vegetables, from restaurant or fast food, medium crust                                                                  | 8000_Mixed | 20 | 21 | -1 | 4 | 2.5 | D |
| 58106755 | Pizza with meat and fruit, medium crust                                                                                                     | 8000_Mixed | 20 | 21 | -1 | 4 | 3   | D |
| 58131523 | Ravioli, cheese-filled, with tomato sauce, canned                                                                                           | 8000_Mixed | 20 | 21 | -1 | 4 | 3.5 | C |
| 58146433 | Pasta with cream sauce, poultry, and added vegetables, ready-to-heat                                                                        | 8000_Mixed | 20 | 21 | -1 | 4 | 3   | C |
| 27510406 | Double cheeseburger, 2 medium patties, with condiments, on bun, from fast food / restaurant                                                 | 8000_Mixed | 20 | 20 | 0  | 4 | 2   | D |
| 27510412 | Double cheeseburger, 2 medium patties, with condiments, on bun, from fast food / restaurant (McDonald's Double Quarter Pounder with Cheese) | 8000_Mixed | 20 | 20 | 0  | 4 | 2   | D |
| 27510413 | Double cheeseburger, 2 medium patties, with condiments, on bun, from fast food / restaurant (Wendy's 1/2 lb Double with cheese)             | 8000_Mixed | 20 | 20 | 0  | 4 | 2   | D |

|          |                                                                                         |            |    |    |    |   |     |   |
|----------|-----------------------------------------------------------------------------------------|------------|----|----|----|---|-----|---|
| 27510705 | Chiliburger, with or without cheese, on bun                                             | 8000_Mixed | 20 | 20 | 0  | 4 | 3.5 | C |
| 27564150 | Frankfurter or hot dog sandwich, beef and pork, plain, on whole wheat bread             | 8000_Mixed | 20 | 20 | 0  | 4 | 2   | D |
| 27564182 | Frankfurter or hot dog sandwich, meat and poultry, plain, on whole wheat bun            | 8000_Mixed | 20 | 20 | 0  | 4 | 2   | D |
| 27564243 | Frankfurter or hot dog sandwich, chicken and/or turkey, plain, on whole grain white bun | 8000_Mixed | 20 | 20 | 0  | 4 | 2   | D |
| 27564290 | Frankfurter or hot dog sandwich, chicken and/or turkey, plain, on multigrain bread      | 8000_Mixed | 20 | 20 | 0  | 4 | 3.5 | D |
| 27510655 | Double hamburger, on white bun, 2 medium patties                                        | 8000_Mixed | 20 | 19 | 1  | 4 | 3   | D |
| 27510671 | Double hamburger, from fast food, 2 medium patties                                      | 8000_Mixed | 20 | 19 | 1  | 4 | 3   | D |
| 28110380 | Salisbury steak with gravy, macaroni and cheese, frozen meal                            | 8000_Mixed | 20 | 19 | 1  | 4 | 3.5 | C |
| 28110640 | Meatballs, Swedish, in sauce, with noodles, frozen meal                                 | 8000_Mixed | 20 | 19 | 1  | 4 | 3   | C |
| 27510649 | Double hamburger, on white bun, 2 small patties                                         | 8000_Mixed | 20 | 18 | 2  | 4 | 3   | D |
| 58101300 | Taco or tostada with beef, cheese and lettuce                                           | 8000_Mixed | 20 | 18 | 2  | 4 | 3.5 | C |
| 14620320 | Topping from meat pizza                                                                 | 8000_Mixed | 20 | 17 | 3  | 4 | 1   | E |
| 27564503 | Frankfurter or hot dog sandwich, with meatless chili, on whole grain white bun          | 8000_Mixed | 20 | 17 | 3  | 4 | 3   | D |
| 27510110 | Beef barbecue sandwich or Sloppy Joe, on bun                                            | 8000_Mixed | 20 | 15 | 5  | 3 | 2   | D |
| 58124230 | Pastry, meat / poultry-filled                                                           | 8000_Mixed | 20 | 10 | 10 | 2 | 2   | D |
| 14640002 | Cheese sandwich, American cheese, on white bread, no spread                             | 8000_Mixed | 19 | 22 | -3 | 4 | 1.5 | E |
| 58104745 | Quesadilla with chicken, from fast food                                                 | 8000_Mixed | 19 | 22 | -3 | 4 | 1.5 | D |
| 14640000 | Cheese sandwich, NFS                                                                    | 8000_Mixed | 19 | 21 | -2 | 4 | 1.5 | E |
| 27540210 | Chicken fillet wrap sandwich, fried, from fast food                                     | 8000_Mixed | 19 | 21 | -2 | 4 | 2   | D |
| 58106565 | Pizza with pepperoni, stuffed crust                                                     | 8000_Mixed | 19 | 21 | -2 | 4 | 2   | D |
| 58106630 | Pizza with meat other than pepperoni, from restaurant or fast food, thick crust         | 8000_Mixed | 19 | 21 | -2 | 4 | 2   | D |
| 58106633 | Pizza, with meat other than pepperoni, stuffed crust                                    | 8000_Mixed | 19 | 21 | -2 | 4 | 2   | D |
| 27510210 | Cheeseburger, plain, on bun                                                             | 8000_Mixed | 19 | 20 | -1 | 4 | 2   | D |
| 27510270 | Double cheeseburger (2 patties), plain, on bun                                          | 8000_Mixed | 19 | 20 | -1 | 4 | 2   | D |
| 27510552 | Whopper Jr (Burger King)                                                                | 8000_Mixed | 19 | 20 | -1 | 4 | 3.5 | C |
| 58106734 | Pizza with extra meat and extra vegetables, prepared from frozen, thick crust           | 8000_Mixed | 19 | 20 | -1 | 4 | 2.5 | D |
| 27510310 | Cheeseburger with tomato and/or catsup, on bun                                          | 8000_Mixed | 19 | 19 | 0  | 4 | 2   | D |
| 27510375 | Double cheeseburger (2 patties, 1/4 lb meat each), with tomato and/or catsup, on bun    | 8000_Mixed | 19 | 19 | 0  | 4 | 1.5 | D |
| 27564210 | Frankfurter or hot dog sandwich, meat and poultry, plain, on whole wheat bread          | 8000_Mixed | 19 | 19 | 0  | 4 | 2   | D |
| 58126290 | Turnover, meat- and cheese-filled, lower in fat                                         | 8000_Mixed | 19 | 19 | 0  | 4 | 3.5 | D |
| 58126410 | Turnover, filled with egg, meat, and cheese, lower in fat                               | 8000_Mixed | 19 | 19 | 0  | 4 | 3.5 | D |
| 75608030 | Onion soup, cream of, canned, undiluted                                                 | 8000_Mixed | 19 | 19 | 0  | 4 | 2.5 | C |
| 75657000 | Vegetable broth, bouillon                                                               | 8000_Mixed | 19 | 19 | 0  | 4 | 3   | C |
| 27510445 | Bacon cheeseburger, 1/3 lb meat, with tomato and/or catsup, on bun                      | 8000_Mixed | 19 | 18 | 1  | 4 | 2   | D |

|          |                                                                                            |            |    |    |    |   |     |   |
|----------|--------------------------------------------------------------------------------------------|------------|----|----|----|---|-----|---|
| 27510680 | Double hamburger (2 patties, 1/4 lb meat each), with tomato and/or catsup, on bun          | 8000_Mixed | 19 | 18 | 1  | 4 | 3   | D |
| 28141600 | Chicken a la king with rice, frozen meal                                                   | 8000_Mixed | 19 | 18 | 1  | 4 | 3   | C |
| 58126280 | Turnover, chicken- or turkey-, and vegetable-filled, lower in fat                          | 8000_Mixed | 19 | 18 | 1  | 4 | 3.5 | C |
| 27564550 | Frankfurter or hot dog sandwich, with meatless chili, on multigrain bread                  | 8000_Mixed | 19 | 17 | 2  | 4 | 2.5 | D |
| 27220150 | Sausage and rice with mushroom sauce                                                       | 8000_Mixed | 19 | 10 | 9  | 3 | 3   | C |
| 58111200 | Puffs, fried, crab meat and cream cheese filled                                            | 8000_Mixed | 19 | 10 | 9  | 2 | 1.5 | E |
| 75607020 | Mushroom soup, cream of, prepared with water                                               | 8000_Mixed | 18 | 22 | -4 | 4 | 3   | C |
| 27520370 | Hot ham and cheese sandwich, on bun                                                        | 8000_Mixed | 18 | 20 | -2 | 4 | 3   | D |
| 58106610 | Pizza with meat other than pepperoni, from restaurant or fast food, NS as to type of crust | 8000_Mixed | 18 | 20 | -2 | 4 | 2   | D |
| 58106625 | Pizza with meat other than pepperoni, from restaurant or fast food, medium crust           | 8000_Mixed | 18 | 20 | -2 | 4 | 2   | D |
| 14710110 | Cheddar cheese soup, canned, undiluted                                                     | 8000_Mixed | 18 | 19 | -1 | 4 | 2   | D |
| 27510170 | Cheeseburger (Burger King)                                                                 | 8000_Mixed | 18 | 19 | -1 | 4 | 3   | D |
| 27510290 | Double cheeseburger (2 patties), plain, on double-decker bun                               | 8000_Mixed | 18 | 19 | -1 | 4 | 2   | D |
| 27510420 | Taco burger, on bun                                                                        | 8000_Mixed | 18 | 19 | -1 | 4 | 3.5 | D |
| 27540146 | Chicken fillet sandwich, fried, from fast food                                             | 8000_Mixed | 18 | 19 | -1 | 4 | 3   | D |
| 27540160 | Chicken fillet sandwich, NS as to fried or grilled, from fast food                         | 8000_Mixed | 18 | 19 | -1 | 4 | 3   | D |
| 27540360 | Turkey and bacon submarine sandwich, with lettuce, tomato and spread                       | 8000_Mixed | 18 | 19 | -1 | 4 | 3.5 | C |
| 58106705 | Pizza with meat and vegetables, from frozen, thick crust                                   | 8000_Mixed | 18 | 19 | -1 | 4 | 2   | D |
| 58146413 | Pasta with cream sauce, meat, and added vegetables, ready-to-heat                          | 8000_Mixed | 18 | 19 | -1 | 4 | 3   | C |
| 27510311 | Cheeseburger, 1 oz meat, plain, on miniature bun                                           | 8000_Mixed | 18 | 18 | 0  | 4 | 2   | D |
| 58101347 | Soft taco with meat, from fast food                                                        | 8000_Mixed | 18 | 18 | 0  | 4 | 3   | D |
| 58101357 | Soft taco with meat and sour cream, from fast food                                         | 8000_Mixed | 18 | 18 | 0  | 4 | 3   | D |
| 58106740 | Pizza with meat and fruit, NS as to type of crust                                          | 8000_Mixed | 18 | 18 | 0  | 4 | 3   | D |
| 58147510 | Flavored pasta                                                                             | 8000_Mixed | 18 | 18 | 0  | 4 | 3.5 | B |
| 58302000 | Macaroni and cheese, diet frozen meal                                                      | 8000_Mixed | 18 | 18 | 0  | 4 | 3.5 | C |
| 27510229 | Quarter Pounder (McDonalds)                                                                | 8000_Mixed | 18 | 17 | 1  | 4 | 3.5 | D |
| 27510276 | Bacon cheeseburger, 1 small patty, with condiments, on bun, from fast food / restaurant    | 8000_Mixed | 18 | 17 | 1  | 4 | 2   | D |
| 27510605 | Hamburger, from fast food, 1 large patty                                                   | 8000_Mixed | 18 | 17 | 1  | 4 | 3   | D |
| 27510606 | Hamburger, 1 medium patty, with condiments, on bun, from fast food / restaurant            | 8000_Mixed | 18 | 17 | 1  | 4 | 3.5 | D |
| 27510620 | Hamburger, 1/4 lb meat, with tomato and/or catsup, on bun                                  | 8000_Mixed | 18 | 17 | 1  | 4 | 3.5 | D |
| 27510635 | Hamburger, on white bun, 1 large patty                                                     | 8000_Mixed | 18 | 17 | 1  | 4 | 3   | D |
| 27564470 | Frankfurter or hot dog sandwich, with chili, on whole wheat bread                          | 8000_Mixed | 18 | 17 | 1  | 4 | 2.5 | D |
| 27564530 | Frankfurter or hot dog sandwich, with meatless chili, on whole wheat bread                 | 8000_Mixed | 18 | 17 | 1  | 4 | 2.5 | D |
| 32202050 | Egg, cheese, and sausage on biscuit                                                        | 8000_Mixed | 18 | 17 | 1  | 4 | 1.5 | E |
| 58134680 | Tortellini, cheese-filled, no sauce                                                        | 8000_Mixed | 18 | 17 | 1  | 4 | 4   | B |

|          |                                                                                                                |            |    |    |    |   |     |   |
|----------|----------------------------------------------------------------------------------------------------------------|------------|----|----|----|---|-----|---|
| 58145117 | Macaroni or noodles with cheese, Easy Mac type                                                                 | 8000_Mixed | 18 | 17 | 1  | 4 | 3.5 | C |
| 58304230 | Ravioli, cheese-filled, with vegetable and fruit (frozen meal)                                                 | 8000_Mixed | 18 | 17 | 1  | 4 | 3.5 | C |
| 27564002 | Frankfurter or hot dog sandwich, NFS, plain, on whole wheat bun                                                | 8000_Mixed | 18 | 16 | 2  | 4 | 2   | D |
| 27564062 | Frankfurter or hot dog sandwich, beef, plain, on whole wheat bun                                               | 8000_Mixed | 18 | 16 | 2  | 4 | 2   | D |
| 27564480 | Frankfurter or hot dog sandwich, with chili, on whole grain white bread                                        | 8000_Mixed | 18 | 16 | 2  | 4 | 2.5 | D |
| 28140320 | Chicken and noodles with vegetable, dessert, frozen meal                                                       | 8000_Mixed | 18 | 16 | 2  | 4 | 3.5 | C |
| 28345010 | Chicken or turkey soup, cream of, canned, reduced sodium, NS as to made with milk or water                     | 8000_Mixed | 18 | 16 | 2  | 4 | 3.5 | B |
| 28345030 | Chicken or turkey soup, cream of, canned, reduced sodium, made with water                                      | 8000_Mixed | 18 | 16 | 2  | 4 | 3.5 | B |
| 58407010 | Instant soup, noodle                                                                                           | 8000_Mixed | 18 | 16 | 2  | 4 | 3.5 | B |
| 28140910 | Chicken, fried, with potatoes, vegetable, cornbread, dessert (frozen meal)                                     | 8000_Mixed | 18 | 15 | 3  | 4 | 3.5 | C |
| 27560700 | Sausage on biscuit, diet                                                                                       | 8000_Mixed | 18 | 6  | 12 | 3 | 3   | D |
| 58164570 | Rice, white, with soy-based sauce, no added fat                                                                | 8000_Mixed | 18 | 6  | 12 | 1 | 3   | C |
| 75607000 | Mushroom soup, NFS                                                                                             | 8000_Mixed | 17 | 21 | -4 | 4 | 3   | C |
| 27520155 | Bacon, lettuce, and tomato submarine sandwich, with spread                                                     | 8000_Mixed | 17 | 18 | -1 | 4 | 4   | C |
| 27520340 | Ham salad sandwich                                                                                             | 8000_Mixed | 17 | 18 | -1 | 4 | 3   | D |
| 27560410 | Puerto Rican sandwich                                                                                          | 8000_Mixed | 17 | 18 | -1 | 4 | 1.5 | E |
| 28150000 | Fish dinner, NFS (frozen meal)                                                                                 | 8000_Mixed | 17 | 18 | -1 | 4 | 3   | C |
| 28150650 | Fish, breaded, or fish sticks, with pasta, vegetable and dessert (frozen meal)                                 | 8000_Mixed | 17 | 18 | -1 | 4 | 3   | C |
| 28355430 | Shrimp soup, cream of, prepared with water                                                                     | 8000_Mixed | 17 | 18 | -1 | 4 | 3   | C |
| 58106505 | Pizza with meat, prepared from frozen, thick crust                                                             | 8000_Mixed | 17 | 18 | -1 | 4 | 2   | D |
| 58146393 | Pasta with cream sauce and added vegetables, ready-to-heat                                                     | 8000_Mixed | 17 | 18 | -1 | 4 | 3   | C |
| 27510165 | Cheeseburger, 1 small patty, with condiments, on bun, from fast food / restaurant                              | 8000_Mixed | 17 | 17 | 0  | 4 | 2   | D |
| 27510172 | Cheeseburger (McDonalds)                                                                                       | 8000_Mixed | 17 | 17 | 0  | 4 | 2   | D |
| 27510173 | Cheeseburger, 1 small patty, with condiments, on bun, from fast food / restaurant (Wendy's Kid's Cheeseburger) | 8000_Mixed | 17 | 17 | 0  | 4 | 2   | D |
| 27510174 | Cheeseburger, 1 small patty, with condiments, on bun, from fast food / restaurant (Wendy's Jr. Cheeseburger)   | 8000_Mixed | 17 | 17 | 0  | 4 | 2   | D |
| 27510573 | Hamburger slider                                                                                               | 8000_Mixed | 17 | 17 | 0  | 4 | 3.5 | D |
| 27510661 | Double hamburger, from fast food, 2 small patties                                                              | 8000_Mixed | 17 | 17 | 0  | 4 | 3.5 | D |
| 27541001 | Turkey, ham, and roast beef club sandwich with cheese, lettuce, tomato, and spread                             | 8000_Mixed | 17 | 17 | 0  | 4 | 4   | B |
| 75607130 | Mushroom soup, made from dry mix                                                                               | 8000_Mixed | 17 | 17 | 0  | 4 | 3   | C |
| 27510521 | Hamburger, NFS                                                                                                 | 8000_Mixed | 17 | 16 | 1  | 4 | 3.5 | D |
| 27510601 | Hamburger, from fast food, 1 medium patty                                                                      | 8000_Mixed | 17 | 16 | 1  | 4 | 3.5 | D |
| 27510631 | Hamburger, on white bun, 1 medium patty                                                                        | 8000_Mixed | 17 | 16 | 1  | 4 | 3.5 | D |
| 27564030 | Frankfurter or hot dog sandwich, NFS, plain, on whole wheat bread                                              | 8000_Mixed | 17 | 16 | 1  | 4 | 2   | D |
| 27564090 | Frankfurter or hot dog sandwich, beef, plain, on whole wheat bread                                             | 8000_Mixed | 17 | 16 | 1  | 4 | 2   | D |

|          |                                                                                              |            |    |    |    |   |     |   |
|----------|----------------------------------------------------------------------------------------------|------------|----|----|----|---|-----|---|
| 27564123 | Frankfurter or hot dog sandwich, beef and pork, plain, on whole grain white bun              | 8000_Mixed | 17 | 16 | 1  | 4 | 2   | D |
| 58305010 | Mosticilli with meatballs, sauce, bread (frozen meal)                                        | 8000_Mixed | 17 | 16 | 1  | 4 | 3   | C |
| 71801020 | Potato soup, prepared with water                                                             | 8000_Mixed | 17 | 16 | 1  | 4 | 3   | C |
| 27510500 | Hamburger, plain, on bun                                                                     | 8000_Mixed | 17 | 15 | 2  | 4 | 3.5 | D |
| 27564040 | Frankfurter or hot dog sandwich, NFS, plain, on whole grain white bread                      | 8000_Mixed | 17 | 15 | 2  | 4 | 2   | D |
| 27564100 | Frankfurter or hot dog sandwich, beef, plain, on whole grain white bread                     | 8000_Mixed | 17 | 15 | 2  | 4 | 2   | D |
| 28340530 | Chicken soup                                                                                 | 8000_Mixed | 17 | 15 | 2  | 4 | 3   | C |
| 27520110 | Bacon sandwich, with spread                                                                  | 8000_Mixed | 17 | 14 | 3  | 4 | 1.5 | E |
| 27560705 | Sausage balls, made with biscuit mix and cheese                                              | 8000_Mixed | 17 | 14 | 3  | 4 | 0.5 | E |
| 58101530 | Soft taco with beef, cheese, lettuce, tomato and salsa                                       | 8000_Mixed | 17 | 14 | 3  | 4 | 3   | D |
| 27520380 | Ham and cheese on English muffin                                                             | 8000_Mixed | 17 | 11 | 6  | 3 | 1.5 | D |
| 27214600 | Creamed dried beef on toast                                                                  | 8000_Mixed | 17 | 7  | 10 | 2 | 2   | D |
| 27540145 | Chicken fillet biscuit, from fast food                                                       | 8000_Mixed | 16 | 19 | -3 | 4 | 1.5 | E |
| 27510506 | Hamburger, 1 miniature patty, with condiments, on miniature bun, from fast food / restaurant | 8000_Mixed | 16 | 17 | -1 | 4 | 3.5 | D |
| 27560500 | Pepperoni and salami submarine sandwich, with lettuce, tomato and spread                     | 8000_Mixed | 16 | 17 | -1 | 4 | 3   | D |
| 58106710 | Pizza with meat and vegetables, NS as to type of crust                                       | 8000_Mixed | 16 | 17 | -1 | 4 | 2.5 | D |
| 58146423 | Pasta with cream sauce and poultry, ready-to-heat                                            | 8000_Mixed | 16 | 17 | -1 | 4 | 2.5 | C |
| 27510530 | Hamburger, 1/4 lb meat, plain, on bun                                                        | 8000_Mixed | 16 | 16 | 0  | 4 | 3   | D |
| 27510575 | Hamburger, on white bun, 1 small patty                                                       | 8000_Mixed | 16 | 16 | 0  | 4 | 3   | D |
| 27510650 | Double hamburger (2 patties), plain, on bun                                                  | 8000_Mixed | 16 | 16 | 0  | 4 | 3   | D |
| 27564170 | Frankfurter or hot dog sandwich, beef and pork, plain, on multigrain bread                   | 8000_Mixed | 16 | 16 | 0  | 4 | 2   | D |
| 28110330 | Salisbury steak with gravy, whipped potatoes, vegetable, dessert, frozen meal                | 8000_Mixed | 16 | 16 | 0  | 4 | 3   | C |
| 58126160 | Turnover, cheese-filled, tomato-based sauce                                                  | 8000_Mixed | 16 | 16 | 0  | 4 | 1.5 | D |
| 27513010 | Roast beef sandwich                                                                          | 8000_Mixed | 16 | 15 | 1  | 4 | 2   | D |
| 27517000 | Hamburger wrap sandwich, from fast food                                                      | 8000_Mixed | 16 | 15 | 1  | 4 | 2   | D |
| 27564183 | Frankfurter or hot dog sandwich, meat and poultry, plain, on whole grain white bun           | 8000_Mixed | 16 | 15 | 1  | 4 | 2   | D |
| 27564230 | Frankfurter or hot dog sandwich, meat and poultry, plain, on multigrain bread                | 8000_Mixed | 16 | 15 | 1  | 4 | 2   | D |
| 58126270 | Turnover, chicken- or turkey-, and cheese-filled, no gravy                                   | 8000_Mixed | 16 | 15 | 1  | 4 | 3.5 | C |
| 27564443 | Frankfurter or hot dog sandwich, with chili, on whole grain white bun                        | 8000_Mixed | 16 | 14 | 2  | 4 | 3   | D |
| 27564490 | Frankfurter or hot dog sandwich, with chili, on multigrain bread                             | 8000_Mixed | 16 | 14 | 2  | 4 | 2.5 | D |
| 28141201 | Teriyaki chicken with rice and vegetable, diet frozen meal                                   | 8000_Mixed | 16 | 14 | 2  | 4 | 3.5 | C |
| 28340520 | Chicken soup, canned, undiluted                                                              | 8000_Mixed | 16 | 14 | 2  | 4 | 3   | C |
| 32202025 | Egg, cheese and ham on bagel                                                                 | 8000_Mixed | 16 | 14 | 2  | 4 | 2   | D |
| 58403020 | Chicken noodle soup, canned, undiluted                                                       | 8000_Mixed | 16 | 14 | 2  | 4 | 3   | C |

|          |                                                                                                        |            |    |    |    |   |     |   |
|----------|--------------------------------------------------------------------------------------------------------|------------|----|----|----|---|-----|---|
| 74604100 | Tomato beef rice soup, prepared with water                                                             | 8000_Mixed | 16 | 14 | 2  | 4 | 3   | C |
| 28140920 | Chicken, fried, with potatoes, vegetable, vegetable soup, dessert (frozen meal)                        | 8000_Mixed | 16 | 13 | 3  | 4 | 3.5 | C |
| 58127350 | Croissant sandwich with bacon, egg, and cheese                                                         | 8000_Mixed | 16 | 13 | 3  | 4 | 2   | D |
| 32202010 | Egg, cheese, and ham on English muffin                                                                 | 8000_Mixed | 16 | 11 | 5  | 4 | 3   | D |
| 32202035 | Egg, extra cheese, and extra sausage, on bun                                                           | 8000_Mixed | 16 | 11 | 5  | 4 | 1.5 | D |
| 32202070 | Egg, cheese, and bacon on biscuit                                                                      | 8000_Mixed | 16 | 11 | 5  | 4 | 1.5 | D |
| 32202080 | Egg, cheese, and bacon on English muffin                                                               | 8000_Mixed | 16 | 11 | 5  | 4 | 3   | D |
| 58100017 | Burrito, taco, or quesadilla with egg, potato, and breakfast meat, from fast food                      | 8000_Mixed | 16 | 11 | 5  | 4 | 2   | D |
| 32202030 | Egg, cheese, and sausage on English muffin                                                             | 8000_Mixed | 16 | 9  | 7  | 4 | 2   | D |
| 27520360 | Ham and cheese sandwich, on bun, with lettuce and spread                                               | 8000_Mixed | 15 | 16 | -1 | 4 | 2   | D |
| 27510510 | Hamburger, with tomato and/or catsup, on bun                                                           | 8000_Mixed | 15 | 15 | 0  | 4 | 3   | D |
| 27510536 | Hamburger, 1 small patty, with condiments, on bun, from fast food / restaurant                         | 8000_Mixed | 15 | 15 | 0  | 4 | 3   | D |
| 27510553 | Hamburger (McDonalds)                                                                                  | 8000_Mixed | 15 | 15 | 0  | 4 | 3   | D |
| 27510555 | Hamburger, 1 small patty, with condiments, on bun, from fast food / restaurant (Wendy's Jr. Hamburger) | 8000_Mixed | 15 | 15 | 0  | 4 | 3   | D |
| 58146403 | Pasta with cream sauce and meat, ready-to-heat                                                         | 8000_Mixed | 15 | 15 | 0  | 4 | 2.5 | C |
| 58128000 | Biscuit with gravy                                                                                     | 8000_Mixed | 15 | 14 | 1  | 3 | 2   | D |
| 58146200 | Pasta, meat-filled, with gravy, canned                                                                 | 8000_Mixed | 15 | 14 | 1  | 4 | 3   | C |
| 74603010 | Tomato beef soup, prepared with water                                                                  | 8000_Mixed | 15 | 14 | 1  | 4 | 3   | C |
| 74604010 | Tomato beef noodle soup, prepared with water                                                           | 8000_Mixed | 15 | 14 | 1  | 4 | 3   | C |
| 27510450 | Cheeseburger, 1/4 lb meat, with ham, on bun                                                            | 8000_Mixed | 15 | 13 | 2  | 4 | 1.5 | D |
| 27510540 | Double hamburger (2 patties), with tomato and/or catsup, on bun                                        | 8000_Mixed | 15 | 13 | 2  | 4 | 3   | D |
| 28120310 | Pork with rice, vegetable, in soy-based sauce (diet frozen meal)                                       | 8000_Mixed | 15 | 13 | 2  | 4 | 3.5 | C |
| 58101400 | Soft taco with beef, cheese, and lettuce                                                               | 8000_Mixed | 15 | 13 | 2  | 4 | 3   | D |
| 58127330 | Croissant sandwich with sausage, egg, and cheese                                                       | 8000_Mixed | 15 | 13 | 2  | 4 | 1.5 | D |
| 58134623 | Tortellini, cheese-filled, meatless, with tomato sauce, canned                                         | 8000_Mixed | 15 | 13 | 2  | 4 | 3.5 | C |
| 58306500 | Chicken burritos, diet frozen meal                                                                     | 8000_Mixed | 15 | 13 | 2  | 4 | 1.5 | E |
| 27564050 | Frankfurter or hot dog sandwich, NFS, plain, on multigrain bread                                       | 8000_Mixed | 15 | 12 | 3  | 4 | 2   | D |
| 27564110 | Frankfurter or hot dog sandwich, beef, plain, on multigrain bread                                      | 8000_Mixed | 15 | 12 | 3  | 4 | 2   | D |
| 14640300 | Cheese spread sandwich                                                                                 | 8000_Mixed | 14 | 16 | -2 | 4 | 1.5 | D |
| 41502000 | Beans and franks, frozen dinner                                                                        | 8000_Mixed | 14 | 14 | 0  | 4 | 3   | C |
| 27510501 | Hamburger slider, from fast food                                                                       | 8000_Mixed | 14 | 13 | 1  | 4 | 3.5 | D |
| 27510531 | Hamburger, from fast food, 1 small patty                                                               | 8000_Mixed | 14 | 13 | 1  | 4 | 3.5 | D |
| 27510551 | Hamburger (Burger King)                                                                                | 8000_Mixed | 14 | 13 | 1  | 4 | 3.5 | D |
| 27520540 | Ham and tomato club sandwich, with lettuce and spread                                                  | 8000_Mixed | 14 | 13 | 1  | 4 | 3   | D |
| 27510610 | Hamburger, 1 oz meat, with tomato and/or catsup, on miniature bun                                      | 8000_Mixed | 14 | 12 | 2  | 4 | 3.5 | D |
| 27515080 | Steak sandwich, plain, on biscuit                                                                      | 8000_Mixed | 14 | 12 | 2  | 3 | 1.5 | E |
| 27540350 | Turkey submarine sandwich, with cheese, lettuce, tomato and spread                                     | 8000_Mixed | 14 | 12 | 2  | 4 | 4   | B |

|          |                                                                                    |            |    |    |    |   |     |   |
|----------|------------------------------------------------------------------------------------|------------|----|----|----|---|-----|---|
| 58100013 | Burrito, taco, or quesadilla with egg and breakfast meat, from fast food           | 8000_Mixed | 14 | 11 | 3  | 4 | 1.5 | D |
| 32202020 | Egg, cheese, and ham on biscuit                                                    | 8000_Mixed | 14 | 9  | 5  | 4 | 1.5 | E |
| 58146383 | Pasta with cream sauce, ready-to-heat                                              | 8000_Mixed | 13 | 14 | -1 | 4 | 2.5 | D |
| 58163310 | Flavored rice mixture                                                              | 8000_Mixed | 13 | 14 | -1 | 4 | 3   | C |
| 27510600 | Hamburger, 1 oz meat, plain, on miniature bun                                      | 8000_Mixed | 13 | 13 | 0  | 4 | 3.5 | D |
| 27520320 | Ham and cheese sandwich, with lettuce and spread                                   | 8000_Mixed | 13 | 13 | 0  | 4 | 2   | D |
| 27520390 | Ham and cheese submarine sandwich, with lettuce, tomato and spread                 | 8000_Mixed | 13 | 12 | 1  | 4 | 3.5 | C |
| 27560000 | Luncheon meat sandwich, NFS, with spread                                           | 8000_Mixed | 13 | 12 | 1  | 4 | 3.5 | C |
| 27564003 | Frankfurter or hot dog sandwich, NFS, plain, on whole grain white bun              | 8000_Mixed | 13 | 12 | 1  | 4 | 1.5 | E |
| 27564063 | Frankfurter or hot dog sandwich, beef, plain, on whole grain white bun             | 8000_Mixed | 13 | 12 | 1  | 4 | 1.5 | E |
| 58163380 | Flavored rice and pasta mixture                                                    | 8000_Mixed | 13 | 12 | 1  | 4 | 3.5 | C |
| 27560370 | Frankfurter or hot dog with chili and cheese, on bun                               | 8000_Mixed | 13 | 10 | 3  | 4 | 1.5 | E |
| 58127290 | Croissant sandwich with bacon and egg                                              | 8000_Mixed | 13 | 9  | 4  | 4 | 1.5 | E |
| 58145160 | Macaroni or noodles with cheese and frankfurters or hot dogs                       | 8000_Mixed | 13 | 9  | 4  | 4 | 2.5 | C |
| 58408010 | Wonton soup                                                                        | 8000_Mixed | 13 | 1  | 12 | 1 | 3   | C |
| 51182010 | Bread stuffing                                                                     | 8000_Mixed | 12 | 14 | -2 | 4 | 2.5 | C |
| 27560120 | Bologna and cheese sandwich, with spread                                           | 8000_Mixed | 12 | 13 | -1 | 4 | 1.5 | E |
| 27520350 | Ham and cheese sandwich, with spread, grilled                                      | 8000_Mixed | 12 | 11 | 1  | 4 | 1.5 | E |
| 27560910 | Cold cut sumarine sandwich, with cheese, lettuce, tomato and spread                | 8000_Mixed | 12 | 11 | 1  | 4 | 3   | D |
| 58145115 | Macaroni or noodles with cheese, from boxed mix with already prepared cheese sauce | 8000_Mixed | 12 | 11 | 1  | 4 | 3   | C |
| 27347100 | Chicken or turkey pot pie                                                          | 8000_Mixed | 12 | 10 | 2  | 4 | 3   | C |
| 27360050 | Meat pie, NFS                                                                      | 8000_Mixed | 12 | 10 | 2  | 4 | 3   | C |
| 58126130 | Turnover, meat- and cheese-filled, no gravy                                        | 8000_Mixed | 12 | 10 | 2  | 4 | 3   | D |
| 32202045 | Egg, cheese, and steak on bagel                                                    | 8000_Mixed | 12 | 9  | 3  | 4 | 2   | D |
| 27564520 | Frankfurter or hot dog sandwich, with meatless chili, on wheat bread               | 8000_Mixed | 12 | 8  | 4  | 4 | 2.5 | D |
| 27560380 | Pochito (frankfurter or hot dog and beef chili wrapped in tortilla)                | 8000_Mixed | 12 | 6  | 6  | 4 | 2   | D |
| 58108050 | Pizza rolls                                                                        | 8000_Mixed | 11 | 12 | -1 | 4 | 2   | D |
| 58407040 | Instant soup, rice                                                                 | 8000_Mixed | 11 | 9  | 2  | 4 | 3   | C |
| 27564501 | Frankfurter or hot dog sandwich, with meatless chili, on wheat bun                 | 8000_Mixed | 11 | 8  | 3  | 4 | 3   | D |
| 58128250 | Dressing with meat and vegetables                                                  | 8000_Mixed | 11 | 8  | 3  | 4 | 2   | D |
| 27560360 | Frankfurter or hot dog, with chili, on bun                                         | 8000_Mixed | 11 | 6  | 5  | 4 | 2   | D |
| 32202060 | Egg and sausage on biscuit                                                         | 8000_Mixed | 11 | 6  | 5  | 4 | 1.5 | D |
| 32202075 | Egg, cheese, and bacon griddle cake sandwich                                       | 8000_Mixed | 11 | 6  | 5  | 4 | 1.5 | D |
| 58151110 | Sushi, no vegetables, no seafood (no fish or shellfish)                            | 8000_Mixed | 11 | 1  | 10 | 1 | 3   | C |
| 58126300 | Turnover, meat- and cheese-filled, tomato-based sauce, lower in fat                | 8000_Mixed | 10 | 10 | 0  | 4 | 3   | C |
| 58163330 | Flavored rice mixture with cheese                                                  | 8000_Mixed | 10 | 8  | 2  | 4 | 3   | C |

|          |                                                                               |            |    |    |    |   |     |   |
|----------|-------------------------------------------------------------------------------|------------|----|----|----|---|-----|---|
| 55701000 | Cake made with glutinous rice                                                 | 8000_Mixed | 10 | 7  | 3  | 2 | 2   | D |
| 58127310 | Croissant sandwich with ham, egg, and cheese                                  | 8000_Mixed | 10 | 7  | 3  | 4 | 1.5 | D |
| 27564380 | Frankfurter or hot dog sandwich, fat free, plain, on wheat bread              | 8000_Mixed | 10 | 6  | 4  | 4 | 3.5 | D |
| 32202090 | Egg and bacon on biscuit                                                      | 8000_Mixed | 10 | 6  | 4  | 4 | 1.5 | D |
| 27560310 | Corny dog, with chili, on bun                                                 | 8000_Mixed | 10 | 2  | 8  | 3 | 2   | D |
| 58201000 | Jelly sandwich, regular jelly, NFS                                            | 8000_Mixed | 9  | 11 | -2 | 4 | 2.5 | D |
| 58201005 | Jelly sandwich, regular jelly, on white bread                                 | 8000_Mixed | 9  | 11 | -2 | 4 | 2.5 | D |
| 27520300 | Ham sandwich, with spread                                                     | 8000_Mixed | 9  | 10 | -1 | 4 | 3   | D |
| 58126400 | Turnover, filled with egg, meat and cheese                                    | 8000_Mixed | 9  | 9  | 0  | 4 | 2.5 | D |
| 27520310 | Ham sandwich with lettuce and spread                                          | 8000_Mixed | 9  | 8  | 1  | 4 | 3.5 | D |
| 27564361 | Frankfurter or hot dog sandwich, fat free, plain, on wheat bun                | 8000_Mixed | 9  | 7  | 2  | 4 | 3.5 | C |
| 27564504 | Frankfurter or hot dog sandwich, with meatless chili, on multigrain bun       | 8000_Mixed | 9  | 5  | 4  | 4 | 3   | D |
| 27564510 | Frankfurter or hot dog sandwich, with meatless chili, on white bread          | 8000_Mixed | 9  | 3  | 6  | 4 | 2   | D |
| 32202055 | Egg, cheese, and sausage griddle cake sandwich                                | 8000_Mixed | 9  | 3  | 6  | 4 | 1.5 | D |
| 27563010 | Meat spread or potted meat sandwich                                           | 8000_Mixed | 8  | 8  | 0  | 4 | 2   | D |
| 27564241 | Frankfurter or hot dog sandwich, chicken and/or turkey, plain, on wheat bun   | 8000_Mixed | 8  | 6  | 2  | 4 | 3   | D |
| 27120210 | Frankfurter or hot dog, with chili, no bun                                    | 8000_Mixed | 8  | 5  | 3  | 4 | 2   | D |
| 27420470 | Sausage and peppers, no sauce                                                 | 8000_Mixed | 8  | 4  | 4  | 4 | 2   | D |
| 27564260 | Frankfurter or hot dog sandwich, chicken and/or turkey, plain, on wheat bread | 8000_Mixed | 8  | 4  | 4  | 4 | 2   | D |
| 27211400 | Corned beef hash                                                              | 8000_Mixed | 8  | 3  | 5  | 4 | 3   | D |
| 27214500 | Corned beef patty                                                             | 8000_Mixed | 8  | 3  | 5  | 4 | 3   | D |
| 27260110 | Hash, NS as to type of meat                                                   | 8000_Mixed | 8  | 3  | 5  | 4 | 3   | D |
| 27510910 | Corned beef sandwich                                                          | 8000_Mixed | 8  | 2  | 6  | 4 | 3.5 | D |
| 58201035 | Jelly sandwich, reduced sugar jelly, on white bread                           | 8000_Mixed | 7  | 6  | 1  | 4 | 3   | C |
| 27564301 | Frankfurter or hot dog sandwich, reduced fat or light, plain, on wheat bun    | 8000_Mixed | 7  | 5  | 2  | 4 | 3.5 | D |
| 27564441 | Frankfurter or hot dog sandwich, with chili, on wheat bun                     | 8000_Mixed | 7  | 5  | 2  | 4 | 3   | D |
| 27564442 | Frankfurter or hot dog sandwich, with chili, on whole wheat bun               | 8000_Mixed | 7  | 5  | 2  | 4 | 3   | D |
| 27564460 | Frankfurter or hot dog sandwich, with chili, on wheat bread                   | 8000_Mixed | 7  | 4  | 3  | 4 | 2.5 | D |
| 28321130 | Bacon soup, cream of, prepared with water                                     | 8000_Mixed | 7  | 4  | 3  | 4 | 3   | C |
| 27564320 | Frankfurter or hot dog sandwich, reduced fat or light, plain, on wheat bread  | 8000_Mixed | 7  | 3  | 4  | 4 | 3.5 | D |
| 27564500 | Frankfurter or hot dog sandwich, with meatless chili, on white bun            | 8000_Mixed | 7  | 3  | 4  | 4 | 3   | D |
| 58310210 | Sausage and french toast, frozen meal                                         | 8000_Mixed | 7  | 2  | 5  | 4 | 3   | D |
| 32202110 | Egg and ham on biscuit                                                        | 8000_Mixed | 7  | 1  | 6  | 4 | 1.5 | D |
| 27560510 | Salami sandwich, with spread                                                  | 8000_Mixed | 6  | 5  | 1  | 4 | 1.5 | E |
| 27560720 | Sausage and spaghetti sauce sandwich                                          | 8000_Mixed | 6  | 4  | 2  | 4 | 2   | D |
| 27564370 | Frankfurter or hot dog sandwich, fat free, plain, on white bread              | 8000_Mixed | 6  | 3  | 3  | 4 | 3   | D |
| 27564444 | Frankfurter or hot dog sandwich, with chili, on multigrain bun                | 8000_Mixed | 6  | 3  | 3  | 4 | 3   | D |



|          |                                                                                  |            |   |   |   |   |     |   |
|----------|----------------------------------------------------------------------------------|------------|---|---|---|---|-----|---|
| 28345110 | Chicken or turkey soup, cream of, NS as to prepared with milk or water           | 8000_Mixed | 6 | 3 | 3 | 4 | 3   | C |
| 28345130 | Chicken or turkey soup, cream of, prepared with water                            | 8000_Mixed | 6 | 3 | 3 | 4 | 3   | C |
| 28345140 | Chicken or turkey soup, cream of, canned, undiluted                              | 8000_Mixed | 6 | 3 | 3 | 4 | 2.5 | C |
| 58400100 | Noodle soup, NFS                                                                 | 8000_Mixed | 6 | 3 | 3 | 4 | 3   | C |
| 27120110 | Sausage with tomato-based sauce                                                  | 8000_Mixed | 6 | 2 | 4 | 4 | 1.5 | D |
| 27511010 | Pastrami sandwich                                                                | 8000_Mixed | 6 | 1 | 5 | 4 | 3   | D |
| 27564121 | Frankfurter or hot dog sandwich, beef and pork, plain, on wheat bun              | 8000_Mixed | 5 | 2 | 3 | 4 | 2   | D |
| 27564181 | Frankfurter or hot dog sandwich, meat and poultry, plain, on wheat bun           | 8000_Mixed | 5 | 2 | 3 | 4 | 2   | D |
| 58407030 | Soup, mostly noodles                                                             | 8000_Mixed | 5 | 2 | 3 | 4 | 3   | C |
| 58407035 | Soup, mostly noodles, reduced sodium                                             | 8000_Mixed | 5 | 2 | 3 | 4 | 3.5 | B |
| 58407050 | Instant soup, noodle with egg, shrimp or chicken                                 | 8000_Mixed | 5 | 2 | 3 | 4 | 3   | C |
| 27564450 | Frankfurter or hot dog sandwich, with chili, on white bread                      | 8000_Mixed | 5 | 1 | 4 | 4 | 2   | D |
| 27564140 | Frankfurter or hot dog sandwich, beef and pork, plain, on wheat bread            | 8000_Mixed | 4 | 2 | 2 | 4 | 1.5 | E |
| 27560670 | Sausage and cheese on English muffin                                             | 8000_Mixed | 4 | 1 | 3 | 4 | 1.5 | E |
| 27564001 | Frankfurter or hot dog sandwich, NFS, plain, on wheat bun                        | 8000_Mixed | 4 | 1 | 3 | 4 | 1.5 | E |
| 27564061 | Frankfurter or hot dog sandwich, beef, plain, on wheat bun                       | 8000_Mixed | 4 | 1 | 3 | 4 | 1.5 | E |
| 27564200 | Frankfurter or hot dog sandwich, meat and poultry, plain, on wheat bread         | 8000_Mixed | 4 | 1 | 3 | 4 | 2   | E |
| 27564364 | Frankfurter or hot dog sandwich, fat free, plain, on multigrain bun              | 8000_Mixed | 4 | 1 | 3 | 4 | 3.5 | C |
| 58127270 | Croissant sandwich with sausage and egg                                          | 8000_Mixed | 4 | 1 | 3 | 4 | 1.5 | E |
| 27500050 | Sandwich, NFS                                                                    | 8000_Mixed | 3 | 1 | 2 | 4 | 2   | D |
| 27500100 | Meat sandwich, NFS                                                               | 8000_Mixed | 3 | 1 | 2 | 4 | 2   | D |
| 27560110 | Bologna sandwich, with spread                                                    | 8000_Mixed | 3 | 1 | 2 | 4 | 2   | D |
| 27560330 | Frankfurter or hot dog, with cheese, plain, on bun                               | 8000_Mixed | 3 | 1 | 2 | 4 | 1.5 | D |
| 27560400 | Chicken frankfurter or hot dog, plain, on bun                                    | 8000_Mixed | 3 | 1 | 2 | 4 | 3   | D |
| 27560710 | Sausage sandwich                                                                 | 8000_Mixed | 3 | 1 | 2 | 4 | 2   | D |
| 27564244 | Frankfurter or hot dog sandwich, chicken and/or turkey, plain, on multigrain bun | 8000_Mixed | 3 | 1 | 2 | 4 | 3   | D |
| 27564440 | Frankfurter or hot dog sandwich, with chili, on white bun                        | 8000_Mixed | 3 | 1 | 2 | 4 | 3   | D |
| 28111010 | Corned beef hash with apple slices, vegetable (frozen meal)                      | 8000_Mixed | 3 | 1 | 2 | 4 | 2.5 | D |
| 32202120 | Egg, cheese and sausage on bagel                                                 | 8000_Mixed | 3 | 1 | 2 | 4 | 2   | D |
| 75607030 | Mushroom soup, canned, undiluted                                                 | 8000_Mixed | 3 | 1 | 2 | 4 | 2.5 | C |
| 27420040 | Frankfurters or hot dogs and sauerkraut                                          | 8000_Mixed | 2 | 1 | 1 | 4 | 1.5 | D |
| 27520170 | Bacon on biscuit                                                                 | 8000_Mixed | 2 | 1 | 1 | 4 | 1   | E |
| 27560650 | Sausage on biscuit                                                               | 8000_Mixed | 2 | 1 | 1 | 4 | 1.5 | E |
| 27564020 | Frankfurter or hot dog sandwich, NFS, plain, on wheat bread                      | 8000_Mixed | 2 | 1 | 1 | 4 | 1.5 | E |
| 27564080 | Frankfurter or hot dog sandwich, beef, plain, on wheat bread                     | 8000_Mixed | 2 | 1 | 1 | 4 | 1.5 | E |
| 27564124 | Frankfurter or hot dog sandwich, beef and pork, plain, on multigrain bun         | 8000_Mixed | 2 | 1 | 1 | 4 | 2   | D |

|          |                                                                                 |                     |     |     |    |   |     |   |
|----------|---------------------------------------------------------------------------------|---------------------|-----|-----|----|---|-----|---|
| 27564184 | Frankfurter or hot dog sandwich, meat and poultry, plain, on multigrain bun     | 8000_Mixed          | 2   | 1   | 1  | 4 | 2   | D |
| 27564250 | Frankfurter or hot dog sandwich, chicken and/or turkey, plain, on white bread   | 8000_Mixed          | 2   | 1   | 1  | 4 | 2   | D |
| 27564304 | Frankfurter or hot dog sandwich, reduced fat or light, plain, on multigrain bun | 8000_Mixed          | 2   | 1   | 1  | 4 | 3   | D |
| 27120250 | Frankfurters or hot dogs with tomato-based sauce                                | 8000_Mixed          | 1   | 1   | 0  | 4 | 1.5 | E |
| 27520250 | Ham on biscuit                                                                  | 8000_Mixed          | 1   | 1   | 0  | 4 | 1   | E |
| 27560300 | Corn dog, frankfurter or hot dog with cornbread coating                         | 8000_Mixed          | 1   | 1   | 0  | 4 | 2   | D |
| 27560320 | Frankfurter or hot dog, plain, on bun                                           | 8000_Mixed          | 1   | 1   | 0  | 4 | 1.5 | E |
| 27560340 | Frankfurter or hot dog, with catsup and/or mustard, on bun                      | 8000_Mixed          | 1   | 1   | 0  | 4 | 1.5 | E |
| 27560350 | Pig in a blanket, frankfurter or hot dog wrapped in dough                       | 8000_Mixed          | 1   | 1   | 0  | 4 | 1.5 | E |
| 27560660 | Sausage griddle cake sandwich                                                   | 8000_Mixed          | 1   | 1   | 0  | 4 | 1.5 | E |
| 27564000 | Frankfurter or hot dog sandwich, NFS, plain, on white bun                       | 8000_Mixed          | 1   | 1   | 0  | 4 | 1.5 | E |
| 27564004 | Frankfurter or hot dog sandwich, NFS, plain, on multigrain bun                  | 8000_Mixed          | 1   | 1   | 0  | 4 | 1.5 | E |
| 27564010 | Frankfurter or hot dog sandwich, NFS, plain, on white bread                     | 8000_Mixed          | 1   | 1   | 0  | 4 | 1.5 | E |
| 27564060 | Frankfurter or hot dog sandwich, beef, plain, on white bun                      | 8000_Mixed          | 1   | 1   | 0  | 4 | 1.5 | E |
| 27564064 | Frankfurter or hot dog sandwich, beef, plain, on multigrain bun                 | 8000_Mixed          | 1   | 1   | 0  | 4 | 1.5 | E |
| 27564070 | Frankfurter or hot dog sandwich, beef, plain, on white bread                    | 8000_Mixed          | 1   | 1   | 0  | 4 | 1.5 | E |
| 27564120 | Frankfurter or hot dog sandwich, beef and pork, plain, on white bun             | 8000_Mixed          | 1   | 1   | 0  | 4 | 2   | D |
| 27564130 | Frankfurter or hot dog sandwich, beef and pork, plain, on white bread           | 8000_Mixed          | 1   | 1   | 0  | 4 | 1.5 | E |
| 27564180 | Frankfurter or hot dog sandwich, meat and poultry, plain, on white bun          | 8000_Mixed          | 1   | 1   | 0  | 4 | 2   | D |
| 27564190 | Frankfurter or hot dog sandwich, meat and poultry, plain, on white bread        | 8000_Mixed          | 1   | 1   | 0  | 4 | 1.5 | E |
| 27564240 | Frankfurter or hot dog sandwich, chicken and/or turkey, plain, on white bun     | 8000_Mixed          | 1   | 1   | 0  | 4 | 2   | D |
| 27564300 | Frankfurter or hot dog sandwich, reduced fat or light, plain, on white bun      | 8000_Mixed          | 1   | 1   | 0  | 4 | 3   | D |
| 27564310 | Frankfurter or hot dog sandwich, reduced fat or light, plain, on white bread    | 8000_Mixed          | 1   | 1   | 0  | 4 | 3   | D |
| 27564360 | Frankfurter or hot dog sandwich, fat free, plain, on white bun                  | 8000_Mixed          | 1   | 1   | 0  | 4 | 3.5 | C |
| 27564418 | Frankfurter or hot dog sandwich, reduced sodium                                 | 8000_Mixed          | 1   | 1   | 0  | 4 | 2   | D |
| 58127210 | Croissant sandwich, filled with ham and cheese                                  | 8000_Mixed          | 1   | 1   | 0  | 4 | 1.5 | E |
| 58310310 | Pancakes and sausage, frozen meal                                               | 8000_Mixed          | 1   | 1   | 0  | 4 | 2   | D |
| 75121000 | Pepper, hot chili, raw                                                          | 8600_SauceCondiment | 100 | 100 | 0  | 1 | 4.5 | A |
| 75226700 | Pimiento                                                                        | 8600_SauceCondiment | 100 | 100 | 0  | 3 | 4   | A |
| 74402110 | Salsa, pico de gallo                                                            | 8600_SauceCondiment | 100 | 96  | 4  | 1 | 3.5 | C |
| 74404060 | Spaghetti sauce, fat free                                                       | 8600_SauceCondiment | 99  | 99  | 0  | 3 | 3.5 | C |
| 75412030 | Eggplant dip                                                                    | 8600_SauceCondiment | 98  | 100 | -2 | 1 | 4.5 | A |
| 75511010 | Hot pepper sauce                                                                | 8600_SauceCondiment | 98  | 99  | -1 | 3 | 2.5 | C |
| 28522050 | Mole verde sauce                                                                | 8600_SauceCondiment | 96  | 97  | -1 | 1 | 3.5 | B |
| 27150155 | Spaghetti sauce with seafood and added vegetables                               | 8600_SauceCondiment | 96  | 91  | 5  | 3 | 4   | B |

|          |                                                                                 |                     |    |     |     |   |     |   |
|----------|---------------------------------------------------------------------------------|---------------------|----|-----|-----|---|-----|---|
| 74402310 | Green tomato-chile sauce, raw (Salsa de tomate verde cruda)                     | 8600_SauceCondiment | 95 | 91  | 4   | 1 | 3.5 | B |
| 75226103 | Peppers, hot, cooked, from canned, fat not added in cooking                     | 8600_SauceCondiment | 94 | 94  | 0   | 3 | 2.5 | D |
| 74420110 | Puerto Rican seasoning without ham and tomato sauce                             | 8600_SauceCondiment | 93 | 100 | -7  | 2 | 4   | A |
| 75226111 | Hot peppers, cooked                                                             | 8600_SauceCondiment | 93 | 96  | -3  | 2 | 4.5 | A |
| 75226100 | Peppers, hot, cooked, NS as to form, fat not added in cooking                   | 8600_SauceCondiment | 92 | 90  | 2   | 1 | 4   | A |
| 75226101 | Peppers, hot, cooked, from fresh, fat not added in cooking                      | 8600_SauceCondiment | 92 | 90  | 2   | 1 | 4   | A |
| 75226102 | Peppers, hot, cooked, from frozen, fat not added in cooking                     | 8600_SauceCondiment | 92 | 90  | 2   | 1 | 4   | A |
| 41420200 | Natto                                                                           | 8600_SauceCondiment | 91 | 97  | -6  | 3 | 5   | A |
| 63408200 | Guacamole with tomatoes and chili peppers                                       | 8600_SauceCondiment | 90 | 88  | 2   | 1 | 4.5 | A |
| 63408010 | Guacamole with tomatoes                                                         | 8600_SauceCondiment | 89 | 88  | 1   | 1 | 4.5 | A |
| 63408010 | Guacamole with tomatoes                                                         | 8600_SauceCondiment | 88 | 86  | 2   | 1 | 4.5 | A |
| 27150151 | Spaghetti sauce with seafood                                                    | 8600_SauceCondiment | 88 | 85  | 3   | 4 | 3.5 | C |
| 63409010 | Guacamole, NFS                                                                  | 8600_SauceCondiment | 86 | 83  | 3   | 1 | 4.5 | A |
| 74406060 | Buffalo sauce                                                                   | 8600_SauceCondiment | 84 | 90  | -6  | 4 | 0.5 | E |
| 41205070 | Hummus, plain                                                                   | 8600_SauceCondiment | 84 | 83  | 1   | 1 | 4   | C |
| 41205075 | Hummus, flavored                                                                | 8600_SauceCondiment | 84 | 83  | 1   | 1 | 4   | C |
| 74402210 | Taco sauce                                                                      | 8600_SauceCondiment | 83 | 91  | -8  | 4 | 3   | C |
| 75111500 | Garlic, raw                                                                     | 8600_SauceCondiment | 82 | 80  | 2   | 1 | 4.5 | A |
| 61204200 | Lemon juice, 100%, canned or bottled                                            | 8600_SauceCondiment | 81 | 89  | -8  | 1 | 3.5 | A |
| 27150200 | Oyster sauce                                                                    | 8600_SauceCondiment | 80 | 72  | 8   | 2 | 3.5 | C |
| 61204600 | Lemon juice, frozen                                                             | 8600_SauceCondiment | 79 | 91  | -12 | 1 | 3.5 | A |
| 74404020 | Spaghetti sauce with added vegetables                                           | 8600_SauceCondiment | 79 | 87  | -8  | 4 | 3.5 | C |
| 74402300 | Salsa made with fruit                                                           | 8600_SauceCondiment | 78 | 80  | -2  | 4 | 3.5 | C |
| 27141035 | Spaghetti sauce with poultry and added vegetables                               | 8600_SauceCondiment | 78 | 77  | 1   | 2 | 4   | B |
| 61204000 | Lemon juice, 100%, NS as to form                                                | 8600_SauceCondiment | 77 | 88  | -11 | 1 | 3.5 | A |
| 61204010 | Lemon juice, 100%, freshly squeezed                                             | 8600_SauceCondiment | 77 | 88  | -11 | 1 | 3.5 | A |
| 74403050 | Tomato sauce, low sodium                                                        | 8600_SauceCondiment | 77 | 88  | -11 | 4 | 4   | A |
| 75226090 | Peppers, hot, cooked, NS as to form, NS as to fat added in cooking              | 8600_SauceCondiment | 77 | 76  | 1   | 2 | 4   | A |
| 75226091 | Peppers, hot, cooked, from fresh, NS as to fat added in cooking                 | 8600_SauceCondiment | 77 | 76  | 1   | 2 | 4   | A |
| 75226110 | Peppers, hot, cooked, NS as to form, fat added in cooking, NS as to type of fat | 8600_SauceCondiment | 77 | 76  | 1   | 2 | 4   | A |
| 75226112 | Peppers, hot, cooked, from frozen, fat added in cooking, NS as to type of fat   | 8600_SauceCondiment | 77 | 76  | 1   | 2 | 4   | A |
| 61207000 | Lime juice, 100%, NS as to form                                                 | 8600_SauceCondiment | 76 | 87  | -11 | 1 | 3.5 | A |
| 61207010 | Lime juice, 100%, freshly squeezed                                              | 8600_SauceCondiment | 76 | 87  | -11 | 1 | 3.5 | A |
| 75226093 | Peppers, hot, cooked, from canned, NS as to fat added in cooking                | 8600_SauceCondiment | 76 | 78  | -2  | 3 | 2.5 | D |
| 75226113 | Peppers, hot, cooked, from canned, fat added in cooking, NS as to type of fat   | 8600_SauceCondiment | 76 | 78  | -2  | 3 | 2.5 | D |
| 74404050 | Spaghetti sauce, reduced sodium                                                 | 8600_SauceCondiment | 75 | 87  | -12 | 4 | 4   | A |
| 27141030 | Spaghetti sauce with poultry                                                    | 8600_SauceCondiment | 75 | 72  | 3   | 3 | 3.5 | C |
| 74402100 | Salsa, NFS                                                                      | 8600_SauceCondiment | 72 | 76  | -4  | 4 | 3.5 | C |

|          |                                                                        |                     |    |    |     |   |     |   |
|----------|------------------------------------------------------------------------|---------------------|----|----|-----|---|-----|---|
| 74402150 | Salsa, red, commercially-prepared                                      | 8600_SauceCondiment | 72 | 76 | -4  | 4 | 3.5 | C |
| 74402200 | Salsa, red, homemade                                                   | 8600_SauceCondiment | 72 | 75 | -3  | 4 | 3.5 | C |
| 11440060 | Tzatziki dip                                                           | 8600_SauceCondiment | 72 | 72 | 0   | 1 | 3.5 | C |
| 75506010 | Mustard                                                                | 8600_SauceCondiment | 72 | 70 | 2   | 3 | 3   | D |
| 61207200 | Lime juice, 100%, canned or bottled                                    | 8600_SauceCondiment | 71 | 81 | -10 | 1 | 3.5 | A |
| 81312100 | Curry sauce                                                            | 8600_SauceCondiment | 71 | 76 | -5  | 2 | 3   | C |
| 12350110 | Spinach and artichoke dip                                              | 8600_SauceCondiment | 69 | 77 | -8  | 3 | 3.5 | C |
| 41420110 | Miso                                                                   | 8600_SauceCondiment | 67 | 66 | 1   | 3 | 0.5 | E |
| 75217400 | Garlic, cooked                                                         | 8600_SauceCondiment | 67 | 63 | 4   | 1 | 4.5 | A |
| 11440050 | Spinach dip, yogurt based                                              | 8600_SauceCondiment | 66 | 71 | -5  | 3 | 3   | C |
| 81302070 | Pesto sauce                                                            | 8600_SauceCondiment | 66 | 66 | 0   | 2 | 1   | E |
| 74404010 | Spaghetti sauce                                                        | 8600_SauceCondiment | 65 | 74 | -9  | 4 | 3.5 | C |
| 74403010 | Tomato sauce                                                           | 8600_SauceCondiment | 65 | 72 | -7  | 4 | 3.5 | C |
| 11440030 | Onion dip, yogurt based                                                | 8600_SauceCondiment | 65 | 69 | -4  | 3 | 3   | C |
| 74404030 | Spaghetti sauce with meat, canned, no extra meat added                 | 8600_SauceCondiment | 65 | 65 | 0   | 3 | 3.5 | C |
| 27162060 | Spaghetti sauce with meat and added vegetables                         | 8600_SauceCondiment | 65 | 62 | 3   | 2 | 3.5 | C |
| 11440040 | Ranch dip, yogurt based                                                | 8600_SauceCondiment | 63 | 68 | -5  | 3 | 2.5 | D |
| 11440070 | Vegetable dip, yogurt based                                            | 8600_SauceCondiment | 63 | 67 | -4  | 3 | 2.5 | D |
| 75236500 | Yeast extract spread                                                   | 8600_SauceCondiment | 63 | 66 | -3  | 4 | 0.5 | D |
| 27162040 | Spaghetti sauce with meat                                              | 8600_SauceCondiment | 63 | 59 | 4   | 2 | 3.5 | C |
| 11440020 | Dill dip, yogurt based                                                 | 8600_SauceCondiment | 62 | 67 | -5  | 3 | 2.5 | D |
| 27111050 | Spaghetti sauce with beef or meat other than lamb or mutton, homemade  | 8600_SauceCondiment | 62 | 60 | 2   | 2 | 3.5 | C |
| 41420300 | Soy sauce                                                              | 8600_SauceCondiment | 62 | 58 | 4   | 3 | 0.5 | E |
| 27130040 | Spaghetti sauce with lamb or mutton, homemade                          | 8600_SauceCondiment | 61 | 60 | 1   | 2 | 3.5 | C |
| 27162050 | Spaghetti sauce with combination of meats, homemade                    | 8600_SauceCondiment | 61 | 59 | 2   | 2 | 3.5 | C |
| 11440010 | Chipotle dip, yogurt based                                             | 8600_SauceCondiment | 60 | 65 | -5  | 3 | 2.5 | D |
| 41420350 | Soy sauce, reduced sodium                                              | 8600_SauceCondiment | 60 | 57 | 3   | 3 | 0.5 | E |
| 74410110 | Puerto Rican seasoning with ham                                        | 8600_SauceCondiment | 60 | 57 | 3   | 2 | 3   | C |
| 28510010 | Gravy or sauce, poultry-based from Puerto Rican-style chicken fricasse | 8600_SauceCondiment | 59 | 57 | 2   | 2 | 3   | C |
| 74402350 | Salsa verde or salsa, green                                            | 8600_SauceCondiment | 58 | 60 | -2  | 4 | 3   | C |
| 74402260 | Enchilada sauce, green                                                 | 8600_SauceCondiment | 57 | 59 | -2  | 4 | 3   | C |
| 41205055 | Layer dip                                                              | 8600_SauceCondiment | 57 | 55 | 2   | 2 | 3   | C |
| 41205050 | Bean dip, made with refried beans                                      | 8600_SauceCondiment | 56 | 61 | -5  | 4 | 4   | B |
| 75503090 | Horseradish                                                            | 8600_SauceCondiment | 56 | 57 | -1  | 4 | 3.5 | C |
| 12350100 | Spinach dip                                                            | 8600_SauceCondiment | 53 | 59 | -6  | 3 | 2.5 | C |
| 41205100 | Black bean sauce                                                       | 8600_SauceCondiment | 51 | 53 | -2  | 2 | 0.5 | E |
| 74404090 | Vodka sauce with tomatoes and cream                                    | 8600_SauceCondiment | 51 | 52 | -1  | 3 | 3   | C |
| 27150190 | Lobster sauce                                                          | 8600_SauceCondiment | 50 | 45 | 5   | 2 | 2   | D |

|          |                                                  |                     |    |    |     |   |     |   |
|----------|--------------------------------------------------|---------------------|----|----|-----|---|-----|---|
| 42204050 | Peanut sauce                                     | 8600_SauceCondiment | 49 | 49 | 0   | 3 | 1   | E |
| 74402250 | Enchilada sauce, red                             | 8600_SauceCondiment | 48 | 53 | -5  | 4 | 3   | C |
| 14620200 | Cheese dip                                       | 8600_SauceCondiment | 47 | 47 | 0   | 2 | 2.5 | D |
| 14650100 | Cheese sauce                                     | 8600_SauceCondiment | 47 | 47 | 0   | 2 | 2.5 | D |
| 14630300 | Welsh rarebit                                    | 8600_SauceCondiment | 47 | 44 | 3   | 3 | 3   | D |
| 28500050 | Gravy, giblet                                    | 8600_SauceCondiment | 47 | 41 | 6   | 3 | 3.5 | C |
| 12350110 | Spinach and artichoke dip                        | 8600_SauceCondiment | 46 | 51 | -5  | 3 | 1.5 | C |
| 14620130 | Seafood dip                                      | 8600_SauceCondiment | 44 | 44 | 0   | 3 | 1.5 | E |
| 14650195 | Alfredo sauce with seafood and added vegetables  | 8600_SauceCondiment | 43 | 33 | 10  | 3 | 2.5 | D |
| 41420100 | Miso sauce                                       | 8600_SauceCondiment | 42 | 51 | -9  | 4 | 1   | E |
| 12350240 | Spinach dip, regular                             | 8600_SauceCondiment | 42 | 46 | -4  | 3 | 1.5 | E |
| 14620110 | Artichoke dip                                    | 8600_SauceCondiment | 42 | 46 | -4  | 3 | 1.5 | E |
| 89901050 | Tomato sauce, for use with vegetables            | 8600_SauceCondiment | 41 | 46 | -5  | 2 | 2   | D |
| 12350020 | Dip, sour cream base, reduced calorie            | 8600_SauceCondiment | 41 | 44 | -3  | 3 | 2   | D |
| 81302030 | Orange sauce (for duck)                          | 8600_SauceCondiment | 41 | 41 | 0   | 2 | 3   | C |
| 74415110 | Puerto Rican seasoning with ham and tomato sauce | 8600_SauceCondiment | 41 | 34 | 7   | 3 | 3   | C |
| 12350010 | Dip, NFS                                         | 8600_SauceCondiment | 40 | 45 | -5  | 4 | 1   | E |
| 12350230 | Ranch dip, regular                               | 8600_SauceCondiment | 40 | 45 | -5  | 4 | 1   | E |
| 12350000 | Dip, sour cream base                             | 8600_SauceCondiment | 40 | 41 | -1  | 3 | 1.5 | D |
| 14650150 | Cheese sauce made with lowfat cheese             | 8600_SauceCondiment | 40 | 34 | 6   | 2 | 2.5 | D |
| 64401000 | Vinegar                                          | 8600_SauceCondiment | 40 | 33 | 7   | 2 | 3.5 | A |
| 83110010 | Mayonnaise-type salad dressing, cholesterol-free | 8600_SauceCondiment | 39 | 48 | -9  | 4 | 1   | E |
| 83107000 | Mayonnaise, regular                              | 8600_SauceCondiment | 39 | 47 | -8  | 4 | 0.5 | E |
| 83107200 | Mayonnaise, made with tofu                       | 8600_SauceCondiment | 39 | 47 | -8  | 4 | 2   | D |
| 12350220 | Onion dip, regular                               | 8600_SauceCondiment | 39 | 43 | -4  | 3 | 1.5 | D |
| 75506100 | Honey mustard dip                                | 8600_SauceCondiment | 39 | 41 | -2  | 2 | 2   | D |
| 14620120 | Shrimp dip, cream cheese base                    | 8600_SauceCondiment | 39 | 28 | 11  | 3 | 1.5 | D |
| 81308100 | Fry sauce                                        | 8600_SauceCondiment | 38 | 48 | -10 | 4 | 1.5 | E |
| 12350210 | Dill dip, regular                                | 8600_SauceCondiment | 38 | 43 | -5  | 4 | 1   | E |
| 12350250 | Vegetable dip, regular                           | 8600_SauceCondiment | 38 | 43 | -5  | 4 | 1   | E |
| 83204030 | Mayonnaise, reduced fat, with olive oil          | 8600_SauceCondiment | 38 | 43 | -5  | 4 | 1.5 | D |
| 14630100 | Cheese fondue                                    | 8600_SauceCondiment | 38 | 34 | 4   | 3 | 1.5 | D |
| 42204100 | Gravy, vegetarian                                | 8600_SauceCondiment | 38 | 33 | 5   | 2 | 3   | C |
| 83100200 | Salad dressing, NFS, for sandwiches              | 8600_SauceCondiment | 37 | 46 | -9  | 4 | 1   | E |
| 12350200 | Chipotle dip, regular                            | 8600_SauceCondiment | 37 | 41 | -4  | 4 | 1   | E |
| 13411000 | White sauce or gravy                             | 8600_SauceCondiment | 37 | 32 | 5   | 2 | 3   | C |
| 28500150 | Gravy, redeye                                    | 8600_SauceCondiment | 37 | 32 | 5   | 3 | 3.5 | B |
| 81330210 | Adobo fresco                                     | 8600_SauceCondiment | 37 | 30 | 7   | 1 | 0.5 | E |
| 13412000 | Milk gravy, quick gravy                          | 8600_SauceCondiment | 37 | 29 | 8   | 1 | 3   | C |

|          |                                                                       |                     |    |    |     |   |     |   |
|----------|-----------------------------------------------------------------------|---------------------|----|----|-----|---|-----|---|
| 14620150 | Cheese dip with chili pepper                                          | 8600_SauceCondiment | 35 | 40 | -5  | 4 | 2.5 | D |
| 74405010 | Tomato relish                                                         | 8600_SauceCondiment | 35 | 38 | -3  | 2 | 3.5 | C |
| 81302060 | Horseradish sauce                                                     | 8600_SauceCondiment | 33 | 42 | -9  | 4 | 1   | E |
| 74402010 | Tomato chili sauce                                                    | 8600_SauceCondiment | 33 | 35 | -2  | 4 | 2   | D |
| 81302050 | Tartar sauce                                                          | 8600_SauceCondiment | 32 | 39 | -7  | 4 | 2   | D |
| 27150210 | Fish sauce                                                            | 8600_SauceCondiment | 32 | 32 | 0   | 4 | 0.5 | E |
| 14650185 | Alfredo sauce with poultry and added vegetables                       | 8600_SauceCondiment | 32 | 24 | 8   | 3 | 2.5 | D |
| 12350245 | Spinach dip, light                                                    | 8600_SauceCondiment | 31 | 36 | -5  | 4 | 2.5 | D |
| 28500030 | Gravy, poultry, low sodium                                            | 8600_SauceCondiment | 31 | 32 | -1  | 4 | 4   | A |
| 28500060 | Gravy, beef or meat, low sodium                                       | 8600_SauceCondiment | 31 | 32 | -1  | 4 | 4   | A |
| 14650190 | Alfredo sauce with seafood                                            | 8600_SauceCondiment | 31 | 21 | 10  | 3 | 2   | D |
| 14650175 | Alfredo sauce with meat and added vegetables                          | 8600_SauceCondiment | 29 | 21 | 8   | 3 | 2.5 | D |
| 83108100 | Mayonnaise, imitation, cholesterol free                               | 8600_SauceCondiment | 27 | 34 | -7  | 4 | 1.5 | D |
| 28510020 | Gravy, meat-based, from Puerto-Rican style stuffed pot roast          | 8600_SauceCondiment | 27 | 19 | 8   | 2 | 2   | D |
| 83204000 | Mayonnaise, light                                                     | 8600_SauceCondiment | 26 | 34 | -8  | 4 | 2   | D |
| 27150200 | Oyster sauce                                                          | 8600_SauceCondiment | 26 | 26 | 0   | 4 | 0.5 | C |
| 14650180 | Alfredo sauce with poultry                                            | 8600_SauceCondiment | 26 | 17 | 9   | 3 | 2   | D |
| 28500080 | Gravy, poultry, home recipe                                           | 8600_SauceCondiment | 26 | 16 | 10  | 2 | 2.5 | C |
| 28510030 | Gravy, meat-based, from Puerto-Rican style beef stew                  | 8600_SauceCondiment | 26 | 16 | 10  | 2 | 2.5 | C |
| 12350215 | Dill dip, light                                                       | 8600_SauceCondiment | 25 | 29 | -4  | 4 | 2   | D |
| 12350235 | Ranch dip, light                                                      | 8600_SauceCondiment | 25 | 29 | -4  | 4 | 2   | D |
| 12350255 | Vegetable dip, light                                                  | 8600_SauceCondiment | 25 | 29 | -4  | 4 | 2   | D |
| 55502000 | Flour and water gravy                                                 | 8600_SauceCondiment | 25 | 11 | 14  | 1 | 3.5 | B |
| 83204060 | Mayonnaise-type salad dressing, low-calorie or diet, cholesterol-free | 8600_SauceCondiment | 24 | 31 | -7  | 4 | 1.5 | D |
| 12350225 | Onion dip, light                                                      | 8600_SauceCondiment | 24 | 27 | -3  | 4 | 2.5 | D |
| 75534550 | Wasabi paste                                                          | 8600_SauceCondiment | 24 | 23 | 1   | 4 | 0.5 | E |
| 28500020 | Gravy, meat, with fruit                                               | 8600_SauceCondiment | 24 | 21 | 3   | 3 | 3.5 | C |
| 83204020 | Mayonnaise, reduced calorie or diet, cholesterol-free                 | 8600_SauceCondiment | 23 | 31 | -8  | 4 | 1.5 | D |
| 14620100 | Dip, cream cheese base                                                | 8600_SauceCondiment | 23 | 19 | 4   | 3 | 0.5 | E |
| 14650170 | Alfredo sauce with meat                                               | 8600_SauceCondiment | 23 | 14 | 9   | 3 | 2   | D |
| 81302010 | Hollandaise sauce                                                     | 8600_SauceCondiment | 23 | 9  | 14  | 2 | 0.5 | E |
| 81302020 | Bernaise sauce                                                        | 8600_SauceCondiment | 23 | 9  | 14  | 2 | 0.5 | E |
| 74401110 | Ketchup, reduced sodium                                               | 8600_SauceCondiment | 22 | 37 | -15 | 4 | 3.5 | B |
| 89901030 | Gravy, for use with vegetables                                        | 8600_SauceCondiment | 21 | 12 | 9   | 3 | 2.5 | D |
| 28500070 | Gravy, beef or meat, home recipe                                      | 8600_SauceCondiment | 21 | 11 | 10  | 2 | 2.5 | C |
| 83110000 | Mayonnaise-type salad dressing                                        | 8600_SauceCondiment | 20 | 27 | -7  | 4 | 2   | D |
| 83108000 | Vegan mayonnaise                                                      | 8600_SauceCondiment | 20 | 24 | -4  | 4 | 2.5 | D |
| 74406100 | Steak sauce                                                           | 8600_SauceCondiment | 20 | 23 | -3  | 4 | 1.5 | E |

|          |                                                                                             |                     |    |    |     |   |     |   |
|----------|---------------------------------------------------------------------------------------------|---------------------|----|----|-----|---|-----|---|
| 14650165 | Alfredo sauce with added vegetables                                                         | 8600_SauceCondiment | 20 | 15 | 5   | 3 | 2.5 | D |
| 12350205 | Chipotle dip, light                                                                         | 8600_SauceCondiment | 18 | 22 | -4  | 4 | 2   | D |
| 43103100 | Sesame sauce                                                                                | 8600_SauceCondiment | 18 | 20 | -2  | 2 | 2   | D |
| 28500010 | Gravy, meat or poultry, with wine                                                           | 8600_SauceCondiment | 16 | 15 | 1   | 4 | 3.5 | C |
| 81301000 | Garlic sauce                                                                                | 8600_SauceCondiment | 16 | 5  | 11  | 2 | 0.5 | E |
| 81301020 | Lemon-butter sauce                                                                          | 8600_SauceCondiment | 16 | 5  | 11  | 2 | 0.5 | E |
| 74406500 | Cocktail sauce                                                                              | 8600_SauceCondiment | 15 | 16 | -1  | 4 | 2   | D |
| 28500040 | Gravy, beef                                                                                 | 8600_SauceCondiment | 15 | 13 | 2   | 4 | 3   | C |
| 28501010 | Gravy, beef, fat free                                                                       | 8600_SauceCondiment | 15 | 13 | 2   | 4 | 3   | C |
| 28520010 | Gravy, NFS                                                                                  | 8600_SauceCondiment | 15 | 13 | 2   | 4 | 3   | C |
| 74403000 | Hot Thai sauce                                                                              | 8600_SauceCondiment | 13 | 17 | -4  | 2 | 0.5 | E |
| 28522000 | Mole sauce                                                                                  | 8600_SauceCondiment | 12 | 16 | -4  | 4 | 3   | C |
| 81312000 | Tartar sauce, reduced fat/calorie                                                           | 8600_SauceCondiment | 11 | 17 | -6  | 4 | 2.5 | D |
| 83204050 | Mayonnaise-type salad dressing, light                                                       | 8600_SauceCondiment | 11 | 17 | -6  | 4 | 2   | D |
| 81302040 | Sandwich spread                                                                             | 8600_SauceCondiment | 11 | 14 | -3  | 4 | 1   | E |
| 14650160 | Alfredo sauce                                                                               | 8600_SauceCondiment | 11 | 5  | 6   | 4 | 1.5 | D |
| 28520000 | Gravy, made with soy sauce                                                                  | 8600_SauceCondiment | 10 | 5  | 5   | 2 | 2.5 | D |
| 89901010 | Cream sauce, for use with vegetables                                                        | 8600_SauceCondiment | 9  | 3  | 6   | 4 | 1   | E |
| 89901040 | Soy based sauce, for use with vegetables                                                    | 8600_SauceCondiment | 8  | 3  | 5   | 2 | 2   | D |
| 83300700 | Mayonnaise, fat free                                                                        | 8600_SauceCondiment | 7  | 9  | -2  | 4 | 2.5 | D |
| 41420250 | Hoisin sauce                                                                                | 8600_SauceCondiment | 6  | 11 | -5  | 4 | 1   | E |
| 91361070 | Plum sauce, Asian style                                                                     | 8600_SauceCondiment | 6  | 7  | -1  | 2 | 1.5 | E |
| 28500000 | Gravy, poultry                                                                              | 8600_SauceCondiment | 5  | 2  | 3   | 4 | 3   | C |
| 28501110 | Gravy, poultry, fat free                                                                    | 8600_SauceCondiment | 5  | 2  | 3   | 4 | 3   | C |
| 41420450 | Worcestershire sauce                                                                        | 8600_SauceCondiment | 3  | 10 | -7  | 4 | 1.5 | E |
| 83203250 | Mayonnaise-type salad dressing, fat-free                                                    | 8600_SauceCondiment | 3  | 9  | -6  | 4 | 2.5 | D |
| 63409020 | Chutney                                                                                     | 8600_SauceCondiment | 3  | 4  | -1  | 3 | 1.5 | E |
| 74401010 | Ketchup                                                                                     | 8600_SauceCondiment | 2  | 13 | -11 | 4 | 2.5 | D |
| 74406050 | Barbecue sauce, reduced sodium                                                              | 8600_SauceCondiment | 2  | 12 | -10 | 4 | 2.5 | D |
| 41420410 | Teriyaki sauce, reduced sodium                                                              | 8600_SauceCondiment | 1  | 6  | -5  | 4 | 1   | E |
| 41420400 | Teriyaki sauce                                                                              | 8600_SauceCondiment | 1  | 5  | -4  | 4 | 0.5 | E |
| 28500100 | Gravy, mushroom                                                                             | 8600_SauceCondiment | 1  | 1  | 0   | 4 | 3   | C |
| 74406010 | Barbecue sauce                                                                              | 8600_SauceCondiment | 1  | 1  | 0   | 4 | 1   | E |
| 91361010 | Sweet and sour sauce                                                                        | 8600_SauceCondiment | 1  | 1  | 0   | 4 | 2.5 | D |
| 91361050 | Duck sauce                                                                                  | 8600_SauceCondiment | 1  | 1  | 0   | 4 | 1.5 | E |
| 11830150 | Cocoa powder, not reconstituted                                                             | 9000_SavorySweet    | 91 | 84 | 7   | 2 | 5   | A |
| 91511090 | Gelatin dessert, dietetic, with fruits and vegetables, sweetened with low calorie sweetener | 9000_SavorySweet    | 89 | 95 | -6  | 1 | 3.5 | A |
| 91511100 | Gelatin salad, dietetic, with vegetables, sweetened with low calorie sweetener              | 9000_SavorySweet    | 86 | 84 | 2   | 2 | 3.5 | B |

|          |                                                                                            |                  |    |    |     |   |     |   |
|----------|--------------------------------------------------------------------------------------------|------------------|----|----|-----|---|-----|---|
| 54403010 | Popcorn, air-popped, unbuttered                                                            | 9000_SavorySweet | 82 | 78 | 4   | 1 | 5   | A |
| 54206010 | Puffed rice cake without salt                                                              | 9000_SavorySweet | 80 | 78 | 2   | 1 | 4   | A |
| 54403000 | Popcorn, popped in oil, unbuttered                                                         | 9000_SavorySweet | 76 | 74 | 2   | 1 | 4   | D |
| 54403090 | Popcorn, popped in oil, unsalted                                                           | 9000_SavorySweet | 75 | 73 | 2   | 1 | 4   | C |
| 11830165 | Chocolate beverage powder, light, dry mix, not reconstituted                               | 9000_SavorySweet | 72 | 81 | -9  | 4 | 3   | D |
| 41310900 | Bean chips                                                                                 | 9000_SavorySweet | 72 | 71 | 1   | 2 | 5   | B |
| 54403046 | Popcorn, popped in oil, with added butter or margarine                                     | 9000_SavorySweet | 71 | 71 | 0   | 1 | 2.5 | D |
| 91701010 | Almonds, chocolate covered                                                                 | 9000_SavorySweet | 69 | 78 | -9  | 4 | 3   | D |
| 54304500 | Cracker, high fiber, no added fat                                                          | 9000_SavorySweet | 68 | 71 | -3  | 4 | 4.5 | B |
| 91511070 | Gelatin dessert, dietetic, with fruit and sour cream, sweetened with low calorie sweetener | 9000_SavorySweet | 67 | 66 | 1   | 3 | 4   | A |
| 54403040 | Popcorn, air-popped, with added butter or margarine                                        | 9000_SavorySweet | 66 | 62 | 4   | 1 | 4   | C |
| 11460200 | Yogurt, frozen, chocolate, nonfat milk                                                     | 9000_SavorySweet | 65 | 72 | -7  | 4 | 3.5 | C |
| 11460400 | Yogurt, frozen, chocolate, nonfat milk, with low-calorie sweetener                         | 9000_SavorySweet | 65 | 72 | -7  | 4 | 3.5 | C |
| 11460300 | Yogurt, frozen, flavors other than chocolate, nonfat milk                                  | 9000_SavorySweet | 64 | 71 | -7  | 4 | 3.5 | C |
| 11460410 | Yogurt, frozen, flavors other than chocolate, nonfat milk, with low-calorie sweetener      | 9000_SavorySweet | 64 | 71 | -7  | 4 | 3.5 | C |
| 53248000 | Cookie, whole wheat, dried fruit, nut                                                      | 9000_SavorySweet | 63 | 66 | -3  | 2 | 2   | D |
| 53233500 | Cookie, oat bran                                                                           | 9000_SavorySweet | 61 | 72 | -11 | 4 | 4   | C |
| 91703500 | Nuts, carob-coated                                                                         | 9000_SavorySweet | 60 | 69 | -9  | 4 | 1.5 | D |
| 91728500 | Sugared pecans, sugar and egg white coating                                                | 9000_SavorySweet | 60 | 69 | -9  | 4 | 3   | D |
| 54207010 | Crispbread, wheat, low sodium                                                              | 9000_SavorySweet | 60 | 64 | -4  | 4 | 4.5 | B |
| 54222000 | Crispbread, rye, low sodium                                                                | 9000_SavorySweet | 60 | 64 | -4  | 4 | 4.5 | B |
| 54305010 | Crackers, crispbread                                                                       | 9000_SavorySweet | 60 | 64 | -4  | 4 | 4.5 | B |
| 54322000 | Crispbread, rye, no added fat                                                              | 9000_SavorySweet | 60 | 64 | -4  | 4 | 4.5 | B |
| 71201300 | Potato based snacks, reduced fat, low sodium, all flavors                                  | 9000_SavorySweet | 60 | 57 | 3   | 2 | 4   | C |
| 73410210 | Sweet potato chips                                                                         | 9000_SavorySweet | 59 | 68 | -9  | 4 | 4.5 | B |
| 51808050 | Breadsticks, hard, gluten free                                                             | 9000_SavorySweet | 59 | 67 | -8  | 4 | 4   | C |
| 54340100 | Crackers, gluten free, plain                                                               | 9000_SavorySweet | 59 | 67 | -8  | 4 | 4   | C |
| 54340110 | Crackers, gluten free, flavored                                                            | 9000_SavorySweet | 59 | 67 | -8  | 4 | 4   | C |
| 54204010 | Cracker, 100% whole wheat, low sodium                                                      | 9000_SavorySweet | 59 | 65 | -6  | 4 | 4   | B |
| 54210010 | Cracker, multigrain, low sodium                                                            | 9000_SavorySweet | 59 | 65 | -6  | 4 | 4   | B |
| 54337100 | Crackers, whole wheat and bran                                                             | 9000_SavorySweet | 58 | 65 | -7  | 4 | 3   | C |
| 91742010 | Sesame Crunch, Sahadi                                                                      | 9000_SavorySweet | 57 | 67 | -10 | 4 | 2.5 | D |
| 54203010 | Crackers, toast thins (rye, wheat, white flour), low sodium                                | 9000_SavorySweet | 57 | 64 | -7  | 4 | 3.5 | C |
| 54337000 | Cracker, 100% whole wheat                                                                  | 9000_SavorySweet | 56 | 64 | -8  | 4 | 3   | C |
| 54337050 | Cracker, 100% whole wheat, reduced fat                                                     | 9000_SavorySweet | 56 | 63 | -7  | 4 | 3   | C |
| 54318500 | Rice cake                                                                                  | 9000_SavorySweet | 56 | 62 | -6  | 4 | 4   | A |
| 11830110 | Cocoa powder with nonfat dry milk and low calorie sweetener, dry mix, not reconstituted    | 9000_SavorySweet | 56 | 61 | -5  | 4 | 2   | E |



|          |                                                                                                                   |                  |    |    |    |   |     |   |
|----------|-------------------------------------------------------------------------------------------------------------------|------------------|----|----|----|---|-----|---|
| 11830170 | Cocoa (or chocolate) flavored beverage powder with low-calorie sweetener, dry mix, not reconstituted              | 9000_SavorySweet | 56 | 61 | -5 | 4 | 2   | E |
| 91708010 | Date candy                                                                                                        | 9000_SavorySweet | 55 | 62 | -7 | 4 | 2.5 | C |
| 54403083 | Popcorn, ready-to-eat packaged, low sodium                                                                        | 9000_SavorySweet | 55 | 60 | -5 | 4 | 4   | C |
| 11830120 | Cocoa, whey, and low calorie sweetener, fortified, dry mix, not reconstituted                                     | 9000_SavorySweet | 54 | 60 | -6 | 4 | 1   | E |
| 71202000 | Potato chips, unsalted                                                                                            | 9000_SavorySweet | 54 | 60 | -6 | 4 | 4   | C |
| 54403070 | Popcorn, popped in oil, lowfat                                                                                    | 9000_SavorySweet | 54 | 58 | -4 | 4 | 4.5 | C |
| 54403082 | Popcorn, ready-to-eat packaged, plain, light                                                                      | 9000_SavorySweet | 54 | 58 | -4 | 4 | 4   | C |
| 53452100 | Pastry, fruit-filled                                                                                              | 9000_SavorySweet | 54 | 50 | 4  | 2 | 3.5 | C |
| 54403054 | Popcorn, microwave, low sodium                                                                                    | 9000_SavorySweet | 53 | 59 | -6 | 4 | 3   | C |
| 54403055 | Popcorn, microwave, unsalted                                                                                      | 9000_SavorySweet | 53 | 59 | -6 | 4 | 3   | C |
| 71202100 | Potato chips, reduced fat, unsalted                                                                               | 9000_SavorySweet | 53 | 58 | -5 | 4 | 4.5 | A |
| 11830115 | Hot chocolate / Cocoa, dry mix, no sugar added, not reconstituted                                                 | 9000_SavorySweet | 53 | 57 | -4 | 4 | 2   | E |
| 54403086 | Popcorn, ready-to-eat packaged, butter flavored, light                                                            | 9000_SavorySweet | 53 | 57 | -4 | 4 | 3   | C |
| 54403088 | Popcorn, ready-to-eat packaged, cheese flavored, light                                                            | 9000_SavorySweet | 53 | 57 | -4 | 4 | 3   | C |
| 54403061 | Popcorn, microwave, kettle corn, light                                                                            | 9000_SavorySweet | 53 | 56 | -3 | 4 | 4.5 | C |
| 91511110 | Gelatin dessert, dietetic, with fruit and whipped topping, sweetened with low calorie sweetener                   | 9000_SavorySweet | 53 | 50 | 3  | 2 | 3.5 | B |
| 91304080 | Topping, fruit, unsweetened                                                                                       | 9000_SavorySweet | 52 | 60 | -8 | 4 | 3.5 | B |
| 54401010 | Salty snacks, corn or cornmeal base, nuts or nuggets, toasted                                                     | 9000_SavorySweet | 52 | 57 | -5 | 4 | 3   | C |
| 54401011 | Corn nuts                                                                                                         | 9000_SavorySweet | 52 | 57 | -5 | 4 | 3   | C |
| 54403081 | Popcorn, ready-to-eat packaged, plain                                                                             | 9000_SavorySweet | 52 | 56 | -4 | 4 | 3   | D |
| 54403053 | Popcorn, microwave, plain, light                                                                                  | 9000_SavorySweet | 52 | 55 | -3 | 4 | 3   | D |
| 54403057 | Popcorn, microwave, butter flavored, light                                                                        | 9000_SavorySweet | 52 | 55 | -3 | 4 | 3   | D |
| 54403060 | Popcorn, popped in oil, lowfat, reduced sodium                                                                    | 9000_SavorySweet | 52 | 54 | -2 | 4 | 4   | C |
| 54402500 | Salty snacks, wheat- and corn-based chips                                                                         | 9000_SavorySweet | 51 | 57 | -6 | 4 | 3   | C |
| 54402600 | Salty snacks, multigrain, whole grain, chips (made with whole corn, whole wheat, rice flour, and whole oat flour) | 9000_SavorySweet | 51 | 57 | -6 | 4 | 3   | C |
| 54420210 | Multigrain chips (Sun Chips)                                                                                      | 9000_SavorySweet | 51 | 57 | -6 | 4 | 3   | C |
| 54440020 | Cracker chips                                                                                                     | 9000_SavorySweet | 51 | 57 | -6 | 4 | 3   | C |
| 54403059 | Popcorn, microwave, kettle corn                                                                                   | 9000_SavorySweet | 51 | 56 | -5 | 4 | 3   | C |
| 54420100 | Oriental party mix, with peanuts, sesame sticks, chili rice crackers and fried green peas                         | 9000_SavorySweet | 51 | 55 | -4 | 4 | 5   | C |
| 13250200 | Mousse, chocolate, lowfat, reduced calorie, prepared from dry mix, water added                                    | 9000_SavorySweet | 51 | 51 | 0  | 2 | 3.5 | C |
| 91511080 | Gelatin dessert, dietetic, with fruit and cream cheese, sweetened with low calorie sweetener                      | 9000_SavorySweet | 51 | 46 | 5  | 2 | 3.5 | B |
| 91501090 | Gelatin dessert with fruit, vegetable, and nuts                                                                   | 9000_SavorySweet | 50 | 58 | -8 | 2 | 3.5 | B |
| 56205240 | Rice dessert bar, frozen, chocolate, nondairy, chocolate covered                                                  | 9000_SavorySweet | 50 | 57 | -7 | 4 | 3.5 | C |
| 71202500 | Potato chips, lightly salted                                                                                      | 9000_SavorySweet | 50 | 57 | -7 | 4 | 4   | C |
| 71201010 | White potato, chips                                                                                               | 9000_SavorySweet | 50 | 56 | -6 | 4 | 3.5 | C |
| 71202510 | Potato chips, restructured, lightly salted                                                                        | 9000_SavorySweet | 50 | 56 | -6 | 4 | 4   | C |

|          |                                                                                 |                  |    |    |     |   |     |   |
|----------|---------------------------------------------------------------------------------|------------------|----|----|-----|---|-----|---|
| 54403080 | Popcorn, ready-to-eat packaged, NFS                                             | 9000_SavorySweet | 50 | 55 | -5  | 4 | 2.5 | D |
| 54403085 | Popcorn, ready-to-eat packaged, butter flavored                                 | 9000_SavorySweet | 50 | 55 | -5  | 4 | 2.5 | D |
| 71220000 | Vegetable chips                                                                 | 9000_SavorySweet | 49 | 58 | -9  | 4 | 4.5 | C |
| 54403050 | Popcorn, flavored                                                               | 9000_SavorySweet | 49 | 55 | -6  | 4 | 2.5 | D |
| 54403087 | Popcorn, ready-to-eat packaged, cheese flavored                                 | 9000_SavorySweet | 49 | 55 | -6  | 4 | 2.5 | D |
| 54403092 | Popcorn, ready-to-eat packaged, other flavored                                  | 9000_SavorySweet | 49 | 55 | -6  | 4 | 2.5 | D |
| 56205200 | Rice, frozen dessert, nondairy, flavors other than chocolate                    | 9000_SavorySweet | 49 | 55 | -6  | 4 | 3.5 | B |
| 71200110 | Potato chips, barbecue flavored                                                 | 9000_SavorySweet | 49 | 55 | -6  | 4 | 3.5 | D |
| 71200120 | Potato chips, sour cream and onion flavored                                     | 9000_SavorySweet | 49 | 55 | -6  | 4 | 3.5 | D |
| 71200140 | Potato chips, other flavored                                                    | 9000_SavorySweet | 49 | 55 | -6  | 4 | 3.5 | D |
| 71200210 | Potato chips, ruffled, barbecue flavored                                        | 9000_SavorySweet | 49 | 55 | -6  | 4 | 3.5 | D |
| 53116500 | Cake or cupcake, pumpkin, without icing or filling                              | 9000_SavorySweet | 49 | 51 | -2  | 2 | 2   | D |
| 13220220 | Pudding, chocolate, made from dry mix, sugar free                               | 9000_SavorySweet | 49 | 43 | 6   | 2 | 3.5 | C |
| 11461270 | Yogurt, frozen, cone, flavors other than chocolate, lowfat milk                 | 9000_SavorySweet | 48 | 54 | -6  | 4 | 3.5 | C |
| 71200130 | Potato chips, cheese flavored                                                   | 9000_SavorySweet | 48 | 54 | -6  | 4 | 3.5 | D |
| 71200220 | Potato chips, ruffled, sour cream and onion flavored                            | 9000_SavorySweet | 48 | 54 | -6  | 4 | 3.5 | D |
| 71200230 | Potato chips, ruffled, cheese flavored                                          | 9000_SavorySweet | 48 | 54 | -6  | 4 | 3.5 | D |
| 71200240 | Potato chips, ruffled, other flavored                                           | 9000_SavorySweet | 48 | 54 | -6  | 4 | 3.5 | D |
| 54319010 | Puffed rice cake                                                                | 9000_SavorySweet | 48 | 53 | -5  | 4 | 4   | C |
| 54401020 | Salty snacks, corn or cornmeal base, corn chips, corn-cheese chips              | 9000_SavorySweet | 48 | 53 | -5  | 4 | 2.5 | D |
| 54401026 | Corn chips, flavored                                                            | 9000_SavorySweet | 48 | 53 | -5  | 4 | 2.5 | D |
| 54401031 | Corn chips, plain (Fritos)                                                      | 9000_SavorySweet | 48 | 53 | -5  | 4 | 2.5 | D |
| 54319020 | Popcorn cake                                                                    | 9000_SavorySweet | 48 | 52 | -4  | 4 | 4   | C |
| 53104100 | Cake or cupcake, carrot, without icing or filling                               | 9000_SavorySweet | 48 | 50 | -2  | 2 | 2   | D |
| 13210810 | Pumpkin pudding, Puerto Rican style                                             | 9000_SavorySweet | 48 | 43 | 5   | 2 | 3.5 | C |
| 91727010 | Nuts, chocolate covered, not almonds or peanuts                                 | 9000_SavorySweet | 47 | 55 | -8  | 4 | 1.5 | E |
| 54403000 | Popcorn, popped in oil, unbuttered                                              | 9000_SavorySweet | 47 | 53 | -6  | 4 | 2   | D |
| 71200010 | Potato chips, NFS                                                               | 9000_SavorySweet | 47 | 53 | -6  | 4 | 3.5 | C |
| 71200100 | Potato chips, plain                                                             | 9000_SavorySweet | 47 | 53 | -6  | 4 | 3.5 | C |
| 71200200 | Potato chips, ruffled, plain                                                    | 9000_SavorySweet | 47 | 53 | -6  | 4 | 3.5 | C |
| 71201015 | White potato chips, regular cut                                                 | 9000_SavorySweet | 47 | 53 | -6  | 4 | 3.5 | C |
| 71201020 | White potato chips, ruffled, rippled, or crinkle cut                            | 9000_SavorySweet | 47 | 53 | -6  | 4 | 3.5 | C |
| 71204000 | Potato puffs, cheese-filled                                                     | 9000_SavorySweet | 47 | 53 | -6  | 4 | 3.5 | C |
| 71201050 | Potato chips, reduced fat                                                       | 9000_SavorySweet | 47 | 51 | -4  | 4 | 4   | C |
| 53102600 | Cake or cupcake, banana, without icing or filling                               | 9000_SavorySweet | 47 | 48 | -1  | 2 | 2   | D |
| 54401021 | Corn chips, plain                                                               | 9000_SavorySweet | 46 | 51 | -5  | 4 | 2   | E |
| 91732100 | Planters Peanut Bar                                                             | 9000_SavorySweet | 45 | 55 | -10 | 4 | 1.5 | E |
| 56205230 | Rice dessert bar, frozen, flavors other than chocolate, nondairy, carob covered | 9000_SavorySweet | 45 | 51 | -6  | 4 | 3   | C |

|          |                                                       |                  |    |    |     |   |     |   |
|----------|-------------------------------------------------------|------------------|----|----|-----|---|-----|---|
| 54305020 | Crackers, flatbread                                   | 9000_SavorySweet | 45 | 48 | -3  | 4 | 4   | C |
| 53102100 | Cake or cupcake, applesauce, without icing or filling | 9000_SavorySweet | 45 | 46 | -1  | 2 | 2   | D |
| 53117100 | Cake or cupcake, spice, without icing or filling      | 9000_SavorySweet | 45 | 46 | -1  | 2 | 2   | D |
| 53120500 | Cake, whole wheat, with fruit and nuts, without icing | 9000_SavorySweet | 45 | 44 | 1   | 2 | 2   | E |
| 11460160 | Yogurt, frozen, chocolate, lowfat milk                | 9000_SavorySweet | 44 | 51 | -7  | 4 | 3.5 | C |
| 54204020 | Crackers, wheat, reduced sodium                       | 9000_SavorySweet | 44 | 48 | -4  | 4 | 4   | B |
| 54204030 | Crackers, woven wheat, reduced sodium                 | 9000_SavorySweet | 44 | 48 | -4  | 4 | 4   | B |
| 71205000 | White potato, sticks                                  | 9000_SavorySweet | 44 | 48 | -4  | 4 | 3   | D |
| 71205020 | Potato sticks, plain                                  | 9000_SavorySweet | 44 | 48 | -4  | 4 | 3   | D |
| 91407150 | Bean paste, sweetened                                 | 9000_SavorySweet | 44 | 48 | -4  | 2 | 4   | C |
| 91301082 | Chocolate syrup, thin type, sugar free                | 9000_SavorySweet | 44 | 41 | 3   | 4 | 3.5 | C |
| 54328120 | Crackers, whole grain, sandwich, peanut butter filled | 9000_SavorySweet | 43 | 48 | -5  | 4 | 2.5 | D |
| 54200100 | Crackers, butter, reduced sodium                      | 9000_SavorySweet | 43 | 47 | -4  | 4 | 4   | B |
| 54318000 | Chips, rice                                           | 9000_SavorySweet | 43 | 47 | -4  | 4 | 4   | C |
| 91716010 | Halvah, plain                                         | 9000_SavorySweet | 42 | 53 | -11 | 4 | 1.5 | E |
| 54401035 | Corn chips, flavored (Fritos)                         | 9000_SavorySweet | 42 | 52 | -10 | 4 | 2   | D |
| 51306000 | Breadsticks, hard, whole wheat                        | 9000_SavorySweet | 42 | 47 | -5  | 4 | 3   | C |
| 54401090 | Corn chips, reduced sodium                            | 9000_SavorySweet | 42 | 47 | -5  | 4 | 2.5 | D |
| 71205040 | Potato sticks, fry shaped                             | 9000_SavorySweet | 42 | 46 | -4  | 4 | 2.5 | E |
| 71205030 | Potato sticks, flavored                               | 9000_SavorySweet | 42 | 45 | -3  | 4 | 2.5 | E |
| 71980200 | Taro chips                                            | 9000_SavorySweet | 42 | 45 | -3  | 4 | 3.5 | C |
| 53415200 | Fritter, banana                                       | 9000_SavorySweet | 42 | 37 | 5   | 3 | 3   | D |
| 53452450 | Cheese pastry puffs                                   | 9000_SavorySweet | 42 | 35 | 7   | 3 | 2   | D |
| 11460190 | Yogurt, frozen, NS as to flavor, nonfat milk          | 9000_SavorySweet | 41 | 49 | -8  | 4 | 3   | C |
| 71200400 | Potato chips, baked, plain                            | 9000_SavorySweet | 41 | 45 | -4  | 4 | 4   | C |
| 71203010 | Potato chips, popped, plain                           | 9000_SavorySweet | 41 | 45 | -4  | 4 | 4   | C |
| 91406000 | Jam, preserve, marmalade, sugar free, all flavors     | 9000_SavorySweet | 41 | 45 | -4  | 4 | 3.5 | B |
| 71201090 | White potato, chips, fat free, made with Olean        | 9000_SavorySweet | 41 | 43 | -2  | 4 | 4.5 | A |
| 53116550 | Cake or cupcake, raisin-nut                           | 9000_SavorySweet | 41 | 42 | -1  | 3 | 1.5 | E |
| 53415220 | Fritter, berry                                        | 9000_SavorySweet | 41 | 37 | 4   | 3 | 2.5 | D |
| 91701030 | Almonds, yogurt-covered                               | 9000_SavorySweet | 40 | 50 | -10 | 4 | 1.5 | E |
| 91728000 | Nut roll, fudge or nougat, caramel and nuts           | 9000_SavorySweet | 40 | 48 | -8  | 4 | 1.5 | E |
| 91731100 | Peanuts, sugar-coated                                 | 9000_SavorySweet | 40 | 48 | -8  | 4 | 1.5 | E |
| 91732000 | Peanut bar                                            | 9000_SavorySweet | 40 | 48 | -8  | 4 | 1.5 | E |
| 54403091 | Popcorn, ready-to-eat packaged, kettle corn, light    | 9000_SavorySweet | 40 | 45 | -5  | 4 | 3   | D |
| 54337060 | Crackers, woven wheat, reduced fat                    | 9000_SavorySweet | 40 | 44 | -4  | 4 | 3   | C |
| 71203030 | Potato chips, popped, NFS                             | 9000_SavorySweet | 40 | 44 | -4  | 4 | 4   | C |
| 53440500 | Strudel, cherry                                       | 9000_SavorySweet | 40 | 43 | -3  | 2 | 2.5 | D |
| 71200410 | Potato chips, baked, flavored                         | 9000_SavorySweet | 40 | 43 | -3  | 4 | 3.5 | C |

|          |                                                                                |                  |    |    |     |   |     |   |
|----------|--------------------------------------------------------------------------------|------------------|----|----|-----|---|-----|---|
| 71201250 | White potato, chips, restructured, baked                                       | 9000_SavorySweet | 40 | 43 | -3  | 4 | 4   | C |
| 71905410 | Plantain chips                                                                 | 9000_SavorySweet | 40 | 43 | -3  | 4 | 3   | C |
| 53118350 | Cake, sweetpotato, with icing                                                  | 9000_SavorySweet | 40 | 42 | -2  | 2 | 1.5 | E |
| 13140710 | Creamsicle, light                                                              | 9000_SavorySweet | 40 | 40 | 0   | 4 | 3.5 | A |
| 54325050 | Crackers, saltine, whole wheat                                                 | 9000_SavorySweet | 39 | 44 | -5  | 4 | 2.5 | D |
| 71201100 | White potato, chips, restructured                                              | 9000_SavorySweet | 39 | 43 | -4  | 4 | 3   | D |
| 71203020 | Potato chips, popped, flavored                                                 | 9000_SavorySweet | 39 | 43 | -4  | 4 | 3.5 | C |
| 71211000 | White potato skins, chips                                                      | 9000_SavorySweet | 39 | 43 | -4  | 4 | 3   | D |
| 71201080 | White potato, chips, fat free                                                  | 9000_SavorySweet | 39 | 41 | -2  | 4 | 5   | C |
| 11461280 | Yogurt, frozen, cone, chocolate, lowfat milk                                   | 9000_SavorySweet | 38 | 44 | -6  | 4 | 3.5 | C |
| 54325060 | Crackers, saltine, multigrain                                                  | 9000_SavorySweet | 38 | 43 | -5  | 4 | 2.5 | D |
| 71200300 | Potato chips, restructured, plain                                              | 9000_SavorySweet | 38 | 41 | -3  | 4 | 2.5 | D |
| 71200310 | Potato chips, restructured, flavored                                           | 9000_SavorySweet | 38 | 41 | -3  | 4 | 2.5 | D |
| 71201060 | Potato chips, fat free                                                         | 9000_SavorySweet | 38 | 41 | -3  | 4 | 4   | C |
| 13160160 | Fat free ice cream, no sugar added, flavors other than chocolate               | 9000_SavorySweet | 38 | 40 | -2  | 4 | 3.5 | B |
| 53387000 | Pie, Toll house chocolate chip                                                 | 9000_SavorySweet | 38 | 38 | 0   | 3 | 1   | E |
| 53451500 | Turnover, guava                                                                | 9000_SavorySweet | 38 | 34 | 4   | 2 | 3   | C |
| 53420310 | Wheat flour fritter, without syrup                                             | 9000_SavorySweet | 38 | 33 | 5   | 3 | 1.5 | D |
| 55801000 | Funnel cake with sugar                                                         | 9000_SavorySweet | 38 | 33 | 5   | 2 | 2   | D |
| 56116000 | Noodles, chow mein                                                             | 9000_SavorySweet | 38 | 33 | 5   | 1 | 2   | D |
| 53451750 | Turnover, pumpkin                                                              | 9000_SavorySweet | 38 | 32 | 6   | 2 | 3   | C |
| 13210110 | Pudding, bread                                                                 | 9000_SavorySweet | 38 | 29 | 9   | 2 | 3   | C |
| 13210300 | Custard                                                                        | 9000_SavorySweet | 38 | 28 | 10  | 1 | 3.5 | C |
| 91701020 | Almonds, sugar-coated                                                          | 9000_SavorySweet | 37 | 50 | -13 | 4 | 1.5 | E |
| 53210910 | Cookie, graham cracker with marshmallow                                        | 9000_SavorySweet | 37 | 48 | -11 | 4 | 1.5 | E |
| 91501110 | Gelatin dessert with fruit and whipped topping                                 | 9000_SavorySweet | 37 | 44 | -7  | 3 | 3   | C |
| 91405000 | Jelly, sugar free, all flavors                                                 | 9000_SavorySweet | 37 | 40 | -3  | 4 | 3.5 | B |
| 53115310 | Cake or cupcake, nut, without icing or filling                                 | 9000_SavorySweet | 37 | 38 | -1  | 3 | 1.5 | E |
| 58124210 | Pastry, cheese-filled                                                          | 9000_SavorySweet | 37 | 36 | 1   | 3 | 2   | D |
| 13220210 | Pudding, flavors other than chocolate, made from dry mix, sugar free           | 9000_SavorySweet | 37 | 30 | 7   | 2 | 3.5 | C |
| 53415120 | Fritter, apple                                                                 | 9000_SavorySweet | 37 | 30 | 7   | 3 | 2.5 | D |
| 91304060 | Topping, nuts and syrup                                                        | 9000_SavorySweet | 36 | 50 | -14 | 4 | 2   | D |
| 91731150 | Peanuts, yogurt covered                                                        | 9000_SavorySweet | 36 | 45 | -9  | 4 | 1   | E |
| 54401120 | Salty snacks, corn or cornmeal base, tortilla chips, fat free, made with Olean | 9000_SavorySweet | 36 | 38 | -2  | 4 | 3.5 | C |
| 71201200 | Potato chips, restructured, reduced fat, lightly salted                        | 9000_SavorySweet | 36 | 38 | -2  | 4 | 3   | D |
| 53415300 | Crisp, blueberry                                                               | 9000_SavorySweet | 36 | 37 | -1  | 2 | 2.5 | D |
| 53310000 | Pie, raspberry, one crust                                                      | 9000_SavorySweet | 36 | 35 | 1   | 2 | 3.5 | C |
| 58157210 | Rice pudding made with coconut milk, Puerto Rican style                        | 9000_SavorySweet | 36 | 32 | 4   | 2 | 1.5 | D |

|          |                                                                                                          |                  |    |    |     |   |     |   |
|----------|----------------------------------------------------------------------------------------------------------|------------------|----|----|-----|---|-----|---|
| 91550300 | Pineapple custard, Puerto Rican style                                                                    | 9000_SavorySweet | 36 | 31 | 5   | 1 | 3   | C |
| 32120200 | Zabaglione                                                                                               | 9000_SavorySweet | 36 | 29 | 7   | 2 | 2.5 | D |
| 11830140 | Chocolate, instant, dry mix, fortified with vitamins and minerals, not reconstituted, Puerto Rican style | 9000_SavorySweet | 35 | 51 | -16 | 4 | 1   | E |
| 44201000 | Carob chips                                                                                              | 9000_SavorySweet | 35 | 40 | -5  | 4 | 1.5 | E |
| 53124120 | Cake, zucchini, with icing                                                                               | 9000_SavorySweet | 35 | 37 | -2  | 2 | 1.5 | E |
| 53440300 | Strudel, berry                                                                                           | 9000_SavorySweet | 35 | 34 | 1   | 2 | 3   | C |
| 55801010 | Funnel cake with sugar and fruit                                                                         | 9000_SavorySweet | 35 | 33 | 2   | 2 | 2   | D |
| 53346000 | Pie, peanut butter cream                                                                                 | 9000_SavorySweet | 35 | 30 | 5   | 2 | 2   | D |
| 53540250 | Breakfast bar, cereal crust with fruit filling, fat free                                                 | 9000_SavorySweet | 34 | 45 | -11 | 4 | 1.5 | E |
| 53104000 | Cake, carrot, NS as to icing                                                                             | 9000_SavorySweet | 34 | 36 | -2  | 2 | 1.5 | E |
| 53303000 | Pie, blackberry, two crust                                                                               | 9000_SavorySweet | 34 | 31 | 3   | 2 | 3   | C |
| 53452200 | Pastry, Italian, with cheese                                                                             | 9000_SavorySweet | 34 | 30 | 4   | 2 | 2.5 | D |
| 53452170 | Pastry, cookie type, fried                                                                               | 9000_SavorySweet | 34 | 28 | 6   | 2 | 2   | D |
| 53344200 | Mixed fruit tart filled with custard or cream cheese                                                     | 9000_SavorySweet | 34 | 27 | 7   | 3 | 3   | C |
| 11830210 | Milk, malted, dry mix, fortified, not reconstituted, flavors other than chocolate                        | 9000_SavorySweet | 33 | 43 | -10 | 4 | 0.5 | E |
| 91406500 | Jam, preserve, marmalade, sweetened with fruit juice concentrates, all flavors                           | 9000_SavorySweet | 33 | 40 | -7  | 3 | 3   | C |
| 91406600 | Jam, preserve, marmalade, reduced sugar, all flavors                                                     | 9000_SavorySweet | 33 | 40 | -7  | 3 | 2.5 | C |
| 54403089 | Popcorn, ready-to-eat-packaged, kettle corn                                                              | 9000_SavorySweet | 33 | 39 | -6  | 4 | 2   | E |
| 91731000 | Peanuts, chocolate covered                                                                               | 9000_SavorySweet | 33 | 38 | -5  | 4 | 1   | E |
| 11460430 | Yogurt, frozen, chocolate, whole milk                                                                    | 9000_SavorySweet | 33 | 37 | -4  | 4 | 3   | C |
| 11461220 | Frozen yogurt bar, chocolate                                                                             | 9000_SavorySweet | 33 | 37 | -4  | 4 | 3   | C |
| 54402080 | Tortilla chips, reduced sodium                                                                           | 9000_SavorySweet | 33 | 36 | -3  | 4 | 3.5 | C |
| 13160400 | Fat free ice cream, flavors other than chocolate                                                         | 9000_SavorySweet | 33 | 35 | -2  | 4 | 3.5 | B |
| 13160420 | Fat free ice cream, NS as to flavor                                                                      | 9000_SavorySweet | 33 | 35 | -2  | 4 | 3.5 | B |
| 54304150 | Crackers, cheese, whole grain                                                                            | 9000_SavorySweet | 33 | 35 | -2  | 4 | 2.5 | D |
| 13161600 | Fudgesicle, light                                                                                        | 9000_SavorySweet | 33 | 34 | -1  | 4 | 3.5 | B |
| 13210530 | Pudding, tapioca, chocolate, made with milk                                                              | 9000_SavorySweet | 33 | 31 | 2   | 2 | 3   | C |
| 58149160 | Noodle pudding, with milk                                                                                | 9000_SavorySweet | 33 | 31 | 2   | 1 | 2.5 | D |
| 53303070 | Pie, blackberry, individual size or tart                                                                 | 9000_SavorySweet | 33 | 30 | 3   | 2 | 2.5 | D |
| 13250000 | Mousse                                                                                                   | 9000_SavorySweet | 33 | 27 | 6   | 3 | 2   | D |
| 58118110 | Cornstarch coconut dessert, Puerto Rican style                                                           | 9000_SavorySweet | 33 | 27 | 6   | 2 | 1.5 | D |
| 91703060 | Caramel with nuts, chocolate covered                                                                     | 9000_SavorySweet | 32 | 42 | -10 | 4 | 1.5 | E |
| 91716110 | Halvah, chocolate covered                                                                                | 9000_SavorySweet | 32 | 42 | -10 | 4 | 1   | E |
| 11460100 | Frozen yogurt, chocolate                                                                                 | 9000_SavorySweet | 32 | 37 | -5  | 4 | 3   | C |
| 53116510 | Cake or cupcake, pumpkin, with icing or filling                                                          | 9000_SavorySweet | 32 | 33 | -1  | 2 | 1   | E |
| 54403051 | Popcorn, microwave, NFS                                                                                  | 9000_SavorySweet | 32 | 33 | -1  | 4 | 1.5 | E |
| 53102700 | Cake or cupcake, banana, with icing or filling                                                           | 9000_SavorySweet | 32 | 31 | 1   | 2 | 1   | E |
| 53415100 | Crisp, apple, apple dessert                                                                              | 9000_SavorySweet | 32 | 31 | 1   | 3 | 4   | C |

|          |                                                                                                                             |                  |    |    |     |   |     |   |
|----------|-----------------------------------------------------------------------------------------------------------------------------|------------------|----|----|-----|---|-----|---|
| 53452150 | Pastry, Chinese, made with rice flour                                                                                       | 9000_SavorySweet | 32 | 30 | 2   | 2 | 3   | C |
| 53440800 | Strudel, cheese and fruit                                                                                                   | 9000_SavorySweet | 32 | 29 | 3   | 2 | 2.5 | D |
| 91700500 | M&M's Almond Chocolate Candies                                                                                              | 9000_SavorySweet | 31 | 41 | -10 | 4 | 1   | E |
| 91405500 | Jelly, reduced sugar, all flavors                                                                                           | 9000_SavorySweet | 31 | 37 | -6  | 3 | 2.5 | C |
| 54309000 | Crackers, oat                                                                                                               | 9000_SavorySweet | 31 | 36 | -5  | 4 | 2.5 | D |
| 54334000 | Crackers, toast thins (rye, pumpernickel, white flour)                                                                      | 9000_SavorySweet | 31 | 36 | -5  | 4 | 2.5 | D |
| 91501120 | Gelatin dessert with fruit and vegetables                                                                                   | 9000_SavorySweet | 31 | 35 | -4  | 3 | 3.5 | B |
| 91520100 | Yokan                                                                                                                       | 9000_SavorySweet | 31 | 35 | -4  | 2 | 3   | C |
| 91703080 | Caramel, all flavors, sugar free                                                                                            | 9000_SavorySweet | 31 | 35 | -4  | 4 | 2.5 | D |
| 54401100 | Salty snacks, corn or cornmeal base, tortilla chips, light (baked with less oil)                                            | 9000_SavorySweet | 31 | 33 | -2  | 4 | 2.5 | D |
| 13230140 | Pudding, chocolate, ready-to-eat, sugar free                                                                                | 9000_SavorySweet | 31 | 32 | -1  | 4 | 3.5 | C |
| 53104260 | Cake or cupcake, carrot, with icing or filling                                                                              | 9000_SavorySweet | 31 | 32 | -1  | 2 | 1   | E |
| 54403001 | Popcorn, NFS                                                                                                                | 9000_SavorySweet | 31 | 32 | -1  | 4 | 1.5 | E |
| 54403052 | Popcorn, microwave, plain                                                                                                   | 9000_SavorySweet | 31 | 32 | -1  | 4 | 1.5 | E |
| 54403056 | Popcorn, microwave, butter flavored                                                                                         | 9000_SavorySweet | 31 | 32 | -1  | 4 | 1.5 | E |
| 54403058 | Popcorn, microwave, cheese flavored                                                                                         | 9000_SavorySweet | 31 | 31 | 0   | 4 | 1.5 | E |
| 54403062 | Popcorn, microwave, other flavored                                                                                          | 9000_SavorySweet | 31 | 31 | 0   | 4 | 1.5 | E |
| 53303510 | Pie, berry, not blackberry, blueberry, boysenberry, huckleberry, raspberry, or strawberry; one crust                        | 9000_SavorySweet | 31 | 30 | 1   | 2 | 2.5 | D |
| 53312000 | Pie, strawberry, one crust                                                                                                  | 9000_SavorySweet | 31 | 28 | 3   | 2 | 3   | C |
| 53310050 | Pie, raspberry, two crust                                                                                                   | 9000_SavorySweet | 31 | 27 | 4   | 2 | 3   | C |
| 91304070 | Topping, peanut butter, thick, fudge type                                                                                   | 9000_SavorySweet | 30 | 42 | -12 | 4 | 2   | D |
| 13120750 | Ice cream cone with nuts, chocolate ice cream                                                                               | 9000_SavorySweet | 30 | 37 | -7  | 4 | 2.5 | D |
| 91733200 | Peanut Bar, chocolate covered candy                                                                                         | 9000_SavorySweet | 30 | 36 | -6  | 4 | 1   | E |
| 41410015 | Soy chips                                                                                                                   | 9000_SavorySweet | 30 | 32 | -2  | 4 | 2.5 | D |
| 53106000 | Cake, chocolate, devil's food, or fudge, pudding-type mix (oil, eggs, and water added to dry mix), without icing or filling | 9000_SavorySweet | 30 | 31 | -1  | 3 | 1.5 | E |
| 53124110 | Cake or cupcake, zucchini                                                                                                   | 9000_SavorySweet | 30 | 31 | -1  | 2 | 1   | E |
| 53410300 | Cobbler, berry                                                                                                              | 9000_SavorySweet | 30 | 28 | 2   | 2 | 2.5 | C |
| 91560100 | Haupia                                                                                                                      | 9000_SavorySweet | 30 | 26 | 4   | 2 | 1.5 | D |
| 53347600 | Pie, squash                                                                                                                 | 9000_SavorySweet | 30 | 25 | 5   | 2 | 3   | C |
| 13210270 | Custard, Puerto Rican style                                                                                                 | 9000_SavorySweet | 30 | 23 | 7   | 1 | 3   | C |
| 44202000 | Carob syrup                                                                                                                 | 9000_SavorySweet | 29 | 43 | -14 | 4 | 2.5 | D |
| 54337010 | Crackers, woven wheat                                                                                                       | 9000_SavorySweet | 29 | 34 | -5  | 4 | 2.5 | D |
| 54337020 | Crackers, woven wheat, plain (Triscuit)                                                                                     | 9000_SavorySweet | 29 | 34 | -5  | 4 | 2.5 | D |
| 54337030 | Crackers, woven wheat, flavored (Triscuit)                                                                                  | 9000_SavorySweet | 29 | 34 | -5  | 4 | 2.5 | D |
| 54338010 | Crackers, wheat, plain (Wheat Thins)                                                                                        | 9000_SavorySweet | 29 | 34 | -5  | 4 | 2.5 | D |
| 11461250 | Frozen yogurt cone, chocolate                                                                                               | 9000_SavorySweet | 29 | 33 | -4  | 4 | 3   | C |
| 54338000 | Crackers, wheat                                                                                                             | 9000_SavorySweet | 29 | 33 | -4  | 4 | 2.5 | D |
| 91770030 | Dietetic or low calorie candy, chocolate covered                                                                            | 9000_SavorySweet | 29 | 33 | -4  | 4 | 0.5 | E |

|          |                                                                                                                                                                     |                  |    |    |    |   |     |   |
|----------|---------------------------------------------------------------------------------------------------------------------------------------------------------------------|------------------|----|----|----|---|-----|---|
| 53105700 | Cake, chocolate, devil's food, or fudge, pudding type mix, made by "cholesterol free" recipe (water, oil and egg whites added to dry mix), without icing or filling | 9000_SavorySweet | 29 | 32 | -3 | 3 | 1.5 | E |
| 91739510 | Raisins, carob covered                                                                                                                                              | 9000_SavorySweet | 29 | 32 | -3 | 4 | 2   | E |
| 53102200 | Cake or cupcake, applesauce, with icing or filling                                                                                                                  | 9000_SavorySweet | 29 | 30 | -1 | 2 | 1   | E |
| 53117200 | Cake or cupcake, spice, with icing or filling                                                                                                                       | 9000_SavorySweet | 29 | 29 | 0  | 2 | 1   | E |
| 91511020 | Gelatin dessert, sugar free, with fruit                                                                                                                             | 9000_SavorySweet | 29 | 29 | 0  | 4 | 3.5 | A |
| 53452120 | Pastry, made with bean or lotus seed paste filling, baked                                                                                                           | 9000_SavorySweet | 29 | 27 | 2  | 1 | 2.5 | D |
| 53314000 | Pie, strawberry, individual size or tart                                                                                                                            | 9000_SavorySweet | 29 | 25 | 4  | 2 | 2.5 | D |
| 53304050 | Pie, blueberry, one crust                                                                                                                                           | 9000_SavorySweet | 29 | 24 | 5  | 3 | 2.5 | C |
| 53341070 | Pie, banana cream, individual size or tart                                                                                                                          | 9000_SavorySweet | 29 | 22 | 7  | 2 | 2.5 | C |
| 53343070 | Pie, coconut cream, individual size or tart                                                                                                                         | 9000_SavorySweet | 29 | 22 | 7  | 2 | 3   | C |
| 13210500 | Pudding, tapioca, made from home recipe, made with milk                                                                                                             | 9000_SavorySweet | 29 | 21 | 8  | 1 | 3   | C |
| 91108010 | Sugar substitute, stevia, liquid                                                                                                                                    | 9000_SavorySweet | 29 | 18 | 11 | 2 | 3.5 | B |
| 13120780 | Ice cream cone, chocolate covered, with nuts, chocolate ice cream                                                                                                   | 9000_SavorySweet | 28 | 35 | -7 | 4 | 2   | D |
| 13120700 | Ice cream cone with nuts, flavors other than chocolate                                                                                                              | 9000_SavorySweet | 28 | 34 | -6 | 4 | 2.5 | D |
| 91403000 | Fruit butter, all flavors                                                                                                                                           | 9000_SavorySweet | 28 | 32 | -4 | 3 | 3   | C |
| 13110310 | Ice cream, no sugar added, NS as to flavor                                                                                                                          | 9000_SavorySweet | 28 | 30 | -2 | 4 | 3   | C |
| 13110320 | Ice cream, no sugar added, flavors other than chocolate                                                                                                             | 9000_SavorySweet | 28 | 30 | -2 | 4 | 3   | C |
| 13140580 | Light ice cream, no sugar added, cone, chocolate                                                                                                                    | 9000_SavorySweet | 28 | 30 | -2 | 4 | 3   | C |
| 53206020 | Cookie, chocolate chip, made from home recipe or purchased at a bakery                                                                                              | 9000_SavorySweet | 28 | 29 | -1 | 2 | 0.5 | E |
| 53415500 | Crisp, peach                                                                                                                                                        | 9000_SavorySweet | 28 | 28 | 0  | 2 | 2.5 | D |
| 54403020 | Popcorn, popped in oil, buttered                                                                                                                                    | 9000_SavorySweet | 28 | 27 | 1  | 4 | 1.5 | E |
| 13241000 | Banana pudding                                                                                                                                                      | 9000_SavorySweet | 28 | 26 | 2  | 3 | 3   | C |
| 13210450 | Firni, Indian pudding                                                                                                                                               | 9000_SavorySweet | 28 | 24 | 4  | 1 | 3   | C |
| 53303500 | Pie, berry, not blackberry, blueberry, boysenberry, huckleberry, raspberry, or strawberry; two crust                                                                | 9000_SavorySweet | 28 | 24 | 4  | 2 | 2.5 | D |
| 53441110 | Baklava                                                                                                                                                             | 9000_SavorySweet | 28 | 24 | 4  | 2 | 1   | E |
| 51165060 | Coffee cake, yeast type, made from home recipe or purchased at a bakery                                                                                             | 9000_SavorySweet | 28 | 22 | 6  | 2 | 2.5 | D |
| 53313000 | Pie, strawberry-rhubarb, two crust                                                                                                                                  | 9000_SavorySweet | 28 | 21 | 7  | 2 | 2.5 | D |
| 13161000 | Milk dessert bar, frozen, made from lowfat milk                                                                                                                     | 9000_SavorySweet | 27 | 34 | -7 | 4 | 4   | C |
| 54338020 | Crackers, wheat, flavored (Wheat Thins)                                                                                                                             | 9000_SavorySweet | 27 | 34 | -7 | 4 | 2.5 | D |
| 91705070 | Chocolate, milk, with peanuts                                                                                                                                       | 9000_SavorySweet | 27 | 34 | -7 | 4 | 0.5 | E |
| 51184100 | Breadsticks, hard, reduced sodium                                                                                                                                   | 9000_SavorySweet | 27 | 32 | -5 | 4 | 4   | B |
| 53102300 | Cake, applesauce, diet, without icing                                                                                                                               | 9000_SavorySweet | 27 | 30 | -3 | 4 | 4   | C |
| 63113030 | Cherry pie filling                                                                                                                                                  | 9000_SavorySweet | 27 | 30 | -3 | 2 | 2.5 | C |
| 54402200 | Snack mix                                                                                                                                                           | 9000_SavorySweet | 27 | 29 | -2 | 4 | 2   | D |
| 54408310 | Pretzels, hard, peanut butter filled                                                                                                                                | 9000_SavorySweet | 27 | 29 | -2 | 4 | 1.5 | E |
| 13110330 | Ice cream, no sugar added, chocolate                                                                                                                                | 9000_SavorySweet | 27 | 28 | -1 | 4 | 3.5 | C |

|          |                                                                                                                    |                  |    |    |     |   |     |   |
|----------|--------------------------------------------------------------------------------------------------------------------|------------------|----|----|-----|---|-----|---|
| 91501070 | Gelatin dessert with fruit and sour cream                                                                          | 9000_SavorySweet | 27 | 28 | -1  | 3 | 3   | C |
| 71201210 | Potato chips, restructured, fat free                                                                               | 9000_SavorySweet | 27 | 27 | 0   | 4 | 3   | D |
| 13140575 | Light ice cream, no sugar added, cone, flavors other than chocolate                                                | 9000_SavorySweet | 27 | 26 | 1   | 4 | 3.5 | C |
| 53410800 | Cobbler, peach                                                                                                     | 9000_SavorySweet | 27 | 24 | 3   | 2 | 3   | C |
| 53410850 | Cobbler, pear                                                                                                      | 9000_SavorySweet | 27 | 24 | 3   | 2 | 3   | D |
| 13210710 | Pudding, cornmeal, milk, and molasses                                                                              | 9000_SavorySweet | 27 | 23 | 4   | 1 | 3   | C |
| 53360000 | Pie, sweet potato                                                                                                  | 9000_SavorySweet | 27 | 23 | 4   | 3 | 2   | D |
| 53440600 | Strudel, cheese                                                                                                    | 9000_SavorySweet | 27 | 23 | 4   | 2 | 2   | D |
| 58123120 | Sweet bread dough, filled with bean paste, meatless, steamed                                                       | 9000_SavorySweet | 27 | 23 | 4   | 1 | 3.5 | C |
| 53115400 | Cake, oatmeal, without icing                                                                                       | 9000_SavorySweet | 27 | 22 | 5   | 2 | 1.5 | E |
| 53302000 | Pie, apricot, two crust                                                                                            | 9000_SavorySweet | 27 | 22 | 5   | 2 | 2.5 | D |
| 53303570 | Pie, berry, not blackberry, blueberry, boysenberry, huckleberry, raspberry, or strawberry, individual size or tart | 9000_SavorySweet | 27 | 22 | 5   | 2 | 2.5 | D |
| 53304070 | Pie, blueberry, individual size or tart                                                                            | 9000_SavorySweet | 27 | 22 | 5   | 2 | 2.5 | D |
| 53430750 | Tamale, sweet, with fruit                                                                                          | 9000_SavorySweet | 27 | 22 | 5   | 2 | 3   | C |
| 53309000 | Pie, raisin, two crust                                                                                             | 9000_SavorySweet | 27 | 20 | 7   | 2 | 2.5 | D |
| 53309070 | Pie, raisin, individual size or tart                                                                               | 9000_SavorySweet | 27 | 20 | 7   | 2 | 2.5 | D |
| 53452130 | Pastry, made with bean paste and salted egg yolk filling, baked                                                    | 9000_SavorySweet | 27 | 19 | 8   | 1 | 1.5 | E |
| 53344070 | Pie, custard, individual size or tart                                                                              | 9000_SavorySweet | 27 | 18 | 9   | 2 | 3   | C |
| 91705310 | Chocolate, sweet or dark, with almonds                                                                             | 9000_SavorySweet | 26 | 32 | -6  | 4 | 1   | E |
| 91734500 | Peanut butter morsels                                                                                              | 9000_SavorySweet | 26 | 32 | -6  | 4 | 1   | E |
| 54102100 | Graham crackers, reduced fat                                                                                       | 9000_SavorySweet | 26 | 31 | -5  | 4 | 2.5 | D |
| 11461100 | Yogurt, frozen, carob-coated                                                                                       | 9000_SavorySweet | 26 | 30 | -4  | 4 | 1.5 | E |
| 11461320 | Frozen yogurt cone, chocolate, waffle cone                                                                         | 9000_SavorySweet | 26 | 29 | -3  | 4 | 3   | C |
| 13140570 | Light ice cream, no sugar added, cone, NS as to flavor                                                             | 9000_SavorySweet | 26 | 27 | -1  | 4 | 3   | C |
| 54401065 | Cheese flavored corn snacks, reduced fat                                                                           | 9000_SavorySweet | 26 | 27 | -1  | 4 | 2   | D |
| 54401085 | Tortilla chips, flavored                                                                                           | 9000_SavorySweet | 26 | 27 | -1  | 4 | 2.5 | D |
| 53100050 | Cake batter, raw, chocolate                                                                                        | 9000_SavorySweet | 26 | 26 | 0   | 3 | 2   | D |
| 53610200 | Coffee cake, crumb or quick-bread type, cheese-filled                                                              | 9000_SavorySweet | 26 | 23 | 3   | 2 | 1.5 | E |
| 53203500 | Cookie, biscotti                                                                                                   | 9000_SavorySweet | 26 | 22 | 4   | 1 | 2   | D |
| 53115600 | Cake, poppyseed, without icing                                                                                     | 9000_SavorySweet | 26 | 21 | 5   | 2 | 1.5 | E |
| 13210150 | Bread pudding made with evaporated milk and rum                                                                    | 9000_SavorySweet | 26 | 20 | 6   | 3 | 2   | D |
| 53311000 | Pie, rhubarb, two crust                                                                                            | 9000_SavorySweet | 26 | 20 | 6   | 3 | 2.5 | D |
| 53342070 | Pie, chocolate cream, individual size or tart                                                                      | 9000_SavorySweet | 26 | 20 | 6   | 2 | 2   | D |
| 53450300 | Turnover or dumpling, berry                                                                                        | 9000_SavorySweet | 26 | 20 | 6   | 2 | 2   | D |
| 91731010 | M&M's Peanut Chocolate Candies                                                                                     | 9000_SavorySweet | 25 | 35 | -10 | 4 | 0.5 | E |
| 91303000 | Molasses                                                                                                           | 9000_SavorySweet | 25 | 32 | -7  | 2 | 1   | D |
| 91734000 | Peanut butter, chocolate covered                                                                                   | 9000_SavorySweet | 25 | 32 | -7  | 4 | 0.5 | E |
| 91705040 | Chocolate, milk, with nuts, not almond or peanuts                                                                  | 9000_SavorySweet | 25 | 30 | -5  | 4 | 0.5 | E |



|          |                                                                             |                  |    |    |    |   |     |   |
|----------|-----------------------------------------------------------------------------|------------------|----|----|----|---|-----|---|
| 54102110 | Crackers, graham, fat free                                                  | 9000_SavorySweet | 25 | 29 | -4 | 4 | 2.5 | D |
| 54103000 | Crackers, breakfast biscuit                                                 | 9000_SavorySweet | 25 | 29 | -4 | 4 | 2.5 | D |
| 54301100 | Crackers, butter, reduced fat                                               | 9000_SavorySweet | 25 | 29 | -4 | 4 | 2   | E |
| 54338100 | Crackers, wheat, reduced fat                                                | 9000_SavorySweet | 25 | 29 | -4 | 4 | 2   | E |
| 13161630 | Light ice cream, bar or stick, with low-calorie sweetener, chocolate coated | 9000_SavorySweet | 25 | 28 | -3 | 4 | 3   | C |
| 54401210 | Salty snacks, corn based puffs and twists, cheese puffs and twists, lowfat  | 9000_SavorySweet | 25 | 27 | -2 | 4 | 2   | D |
| 54420200 | Multigrain mixture, bread sticks, sesame nuggets, pretzels, rye chips       | 9000_SavorySweet | 25 | 27 | -2 | 4 | 1.5 | E |
| 13252500 | Barfi or Burfi, Indian dessert                                              | 9000_SavorySweet | 25 | 26 | -1 | 2 | 1.5 | E |
| 63420205 | Frozen fruit juice bar, no sugar added                                      | 9000_SavorySweet | 25 | 26 | -1 | 4 | 3.5 | A |
| 53105275 | Cake or cupcake, chocolate, devil's food or fudge, without icing or filling | 9000_SavorySweet | 25 | 25 | 0  | 3 | 2   | D |
| 53260500 | Cookie, sugar wafer, sugar free                                             | 9000_SavorySweet | 25 | 25 | 0  | 4 | 4   | C |
| 53344300 | Dessert pizza                                                               | 9000_SavorySweet | 25 | 25 | 0  | 3 | 3   | C |
| 91501080 | Gelatin dessert with fruit and cream cheese                                 | 9000_SavorySweet | 25 | 24 | 1  | 3 | 3   | C |
| 53348000 | Pie, strawberry cream                                                       | 9000_SavorySweet | 25 | 23 | 2  | 3 | 2.5 | C |
| 53118310 | Cake, sponge, chocolate, with icing                                         | 9000_SavorySweet | 25 | 22 | 3  | 2 | 1.5 | E |
| 53307050 | Pie, peach, one crust                                                       | 9000_SavorySweet | 25 | 22 | 3  | 2 | 3   | C |
| 53410500 | Cobbler, cherry                                                             | 9000_SavorySweet | 25 | 22 | 3  | 2 | 2.5 | D |
| 53610100 | Coffee cake, crumb or quick-bread type                                      | 9000_SavorySweet | 25 | 22 | 3  | 1 | 1.5 | E |
| 13210370 | Creme brulee                                                                | 9000_SavorySweet | 25 | 21 | 4  | 1 | 3   | C |
| 53305010 | Pie, cherry, one crust                                                      | 9000_SavorySweet | 25 | 21 | 4  | 2 | 2.5 | D |
| 53311050 | Pie, rhubarb, one crust                                                     | 9000_SavorySweet | 25 | 21 | 4  | 2 | 3   | C |
| 53348070 | Pie, strawberry cream, individual size or tart                              | 9000_SavorySweet | 25 | 21 | 4  | 3 | 2.5 | D |
| 53453170 | Empanada, Mexican turnover, pumpkin                                         | 9000_SavorySweet | 25 | 17 | 8  | 2 | 3   | D |
| 11460510 | Frozen yogurt, soft serve, chocolate                                        | 9000_SavorySweet | 24 | 31 | -7 | 4 | 2.5 | D |
| 54403006 | Popcorn, movie theater, unbuttered                                          | 9000_SavorySweet | 24 | 27 | -3 | 4 | 0.5 | E |
| 53260200 | Cookie, oatmeal, sugar free                                                 | 9000_SavorySweet | 24 | 25 | -1 | 4 | 2   | E |
| 54401170 | Tortilla chips, low fat, unsalted                                           | 9000_SavorySweet | 24 | 25 | -1 | 4 | 4   | A |
| 53347000 | Pie, pumpkin                                                                | 9000_SavorySweet | 24 | 24 | 0  | 4 | 2.5 | D |
| 53347070 | Pie, pumpkin, individual size or tart                                       | 9000_SavorySweet | 24 | 24 | 0  | 4 | 2.5 | D |
| 13210180 | Pudding, Mexican bread                                                      | 9000_SavorySweet | 24 | 23 | 1  | 3 | 2   | D |
| 53102500 | Cake, banana, NS as to icing                                                | 9000_SavorySweet | 24 | 23 | 1  | 2 | 2   | D |
| 53111500 | Cake, graham cracker, without icing                                         | 9000_SavorySweet | 24 | 22 | 2  | 3 | 1.5 | E |
| 53347100 | Pie, raspberry cream                                                        | 9000_SavorySweet | 24 | 21 | 3  | 3 | 2.5 | D |
| 53200100 | Cookie, batter or dough, raw                                                | 9000_SavorySweet | 24 | 20 | 4  | 3 | 1   | E |
| 58118210 | Cornmeal coconut dessert, Puerto Rican style                                | 9000_SavorySweet | 24 | 19 | 5  | 2 | 1   | E |
| 53306070 | Pie, mince, individual size or tart                                         | 9000_SavorySweet | 24 | 17 | 7  | 2 | 2   | D |
| 53451000 | Turnover or dumpling, peach                                                 | 9000_SavorySweet | 24 | 17 | 7  | 2 | 2   | D |

|          |                                                                                                         |                  |    |    |     |   |     |   |
|----------|---------------------------------------------------------------------------------------------------------|------------------|----|----|-----|---|-----|---|
| 53122080 | Cake, shortcake, biscuit type, with fruit                                                               | 9000_SavorySweet | 24 | 15 | 9   | 1 | 2.5 | D |
| 91713060 | Fudge, peanut butter, with nuts                                                                         | 9000_SavorySweet | 23 | 34 | -11 | 4 | 1   | E |
| 54403120 | Popcorn, caramel coated, with nuts                                                                      | 9000_SavorySweet | 23 | 31 | -8  | 4 | 1.5 | E |
| 91705060 | Milk chocolate candy, with almonds                                                                      | 9000_SavorySweet | 23 | 28 | -5  | 4 | 0.5 | E |
| 53260600 | Cookie, peanut butter, sugar free                                                                       | 9000_SavorySweet | 23 | 26 | -3  | 4 | 2   | D |
| 54102050 | Crackers, oatmeal                                                                                       | 9000_SavorySweet | 23 | 26 | -3  | 4 | 2.5 | D |
| 54339000 | Crackers, corn                                                                                          | 9000_SavorySweet | 23 | 26 | -3  | 4 | 2.5 | D |
| 53116560 | Cake, raisin-nut, with icing                                                                            | 9000_SavorySweet | 23 | 25 | -2  | 3 | 1.5 | E |
| 54401055 | Cheese flavored corn snacks                                                                             | 9000_SavorySweet | 23 | 25 | -2  | 4 | 1.5 | E |
| 54401050 | Salty snacks, corn or cornmeal base, corn puffs and twists; corn-cheese puffs and twists                | 9000_SavorySweet | 23 | 24 | -1  | 4 | 1.5 | E |
| 53205500 | Cookie, butterscotch chip                                                                               | 9000_SavorySweet | 23 | 23 | 0   | 3 | 0.5 | E |
| 13210250 | Pudding, chocolate, low calorie, containing artificial sweetener, NS as to from dry mix or ready-to-eat | 9000_SavorySweet | 23 | 22 | 1   | 4 | 3   | C |
| 13250100 | Mousse, not chocolate                                                                                   | 9000_SavorySweet | 23 | 22 | 1   | 3 | 2   | D |
| 53441210 | Basbousa                                                                                                | 9000_SavorySweet | 23 | 22 | 1   | 2 | 2.5 | D |
| 53224250 | Cookie, lemon bar                                                                                       | 9000_SavorySweet | 23 | 21 | 2   | 2 | 1.5 | E |
| 53410100 | Cobbler, apple                                                                                          | 9000_SavorySweet | 23 | 21 | 2   | 2 | 2.5 | C |
| 13210190 | Pudding, Mexican bread, low fat                                                                         | 9000_SavorySweet | 23 | 20 | 3   | 3 | 2   | D |
| 53105500 | Cake, chocolate, with icing, diet                                                                       | 9000_SavorySweet | 23 | 20 | 3   | 4 | 2.5 | E |
| 53345000 | Pie, lemon cream                                                                                        | 9000_SavorySweet | 23 | 20 | 3   | 2 | 2   | D |
| 53307500 | Pie, pear, two crust                                                                                    | 9000_SavorySweet | 23 | 18 | 5   | 2 | 2.5 | D |
| 53307070 | Pie, peach, individual size or tart                                                                     | 9000_SavorySweet | 23 | 17 | 6   | 2 | 2.5 | D |
| 53450500 | Turnover or dumpling, cherry                                                                            | 9000_SavorySweet | 23 | 17 | 6   | 2 | 2.5 | D |
| 53122070 | Cake, shortcake, biscuit type, with whipped cream and fruit                                             | 9000_SavorySweet | 23 | 16 | 7   | 2 | 2   | D |
| 53311070 | Pie, rhubarb, individual size or tart                                                                   | 9000_SavorySweet | 23 | 16 | 7   | 3 | 2.5 | D |
| 53420400 | Sopaipilla, without syrup or honey                                                                      | 9000_SavorySweet | 23 | 15 | 8   | 2 | 1.5 | E |
| 91407100 | Guava paste                                                                                             | 9000_SavorySweet | 22 | 31 | -9  | 3 | 1.5 | D |
| 91734100 | Reese's Peanut Butter Cup                                                                               | 9000_SavorySweet | 22 | 30 | -8  | 4 | 0.5 | E |
| 53223100 | Cookie, granola                                                                                         | 9000_SavorySweet | 22 | 27 | -5  | 4 | 1   | E |
| 53231400 | Cookie, multigrain, high fiber                                                                          | 9000_SavorySweet | 22 | 27 | -5  | 4 | 1   | E |
| 54102080 | Crackers, graham, with raisins                                                                          | 9000_SavorySweet | 22 | 27 | -5  | 4 | 2   | D |
| 91361020 | Fruit sauce                                                                                             | 9000_SavorySweet | 22 | 27 | -5  | 2 | 2   | D |
| 53415600 | Crisp, rhubarb                                                                                          | 9000_SavorySweet | 22 | 26 | -4  | 3 | 2   | D |
| 54326000 | Crackers, multigrain                                                                                    | 9000_SavorySweet | 22 | 26 | -4  | 4 | 1.5 | E |
| 13120130 | Ice cream bar or stick, rich ice cream, chocolate covered, with nuts                                    | 9000_SavorySweet | 22 | 24 | -2  | 4 | 1.5 | D |
| 54328000 | Crackers, sandwich                                                                                      | 9000_SavorySweet | 22 | 24 | -2  | 4 | 1.5 | E |
| 54328100 | Crackers, sandwich, peanut butter filled                                                                | 9000_SavorySweet | 22 | 24 | -2  | 4 | 1.5 | E |
| 13210610 | Pudding, coconut                                                                                        | 9000_SavorySweet | 22 | 23 | -1  | 3 | 3   | C |
| 53410900 | Cobbler, rhubarb                                                                                        | 9000_SavorySweet | 22 | 23 | -1  | 2 | 2.5 | D |

|          |                                                                                                                    |                  |    |    |     |   |     |   |
|----------|--------------------------------------------------------------------------------------------------------------------|------------------|----|----|-----|---|-----|---|
| 53610170 | Coffee cake, crumb or quick-bread type, with fruit                                                                 | 9000_SavorySweet | 22 | 21 | 1   | 2 | 2   | D |
| 53115100 | Cake or cupcake, marble, without icing or filling                                                                  | 9000_SavorySweet | 22 | 20 | 2   | 3 | 1.5 | E |
| 53385500 | Pie, oatmeal                                                                                                       | 9000_SavorySweet | 22 | 20 | 2   | 3 | 1.5 | E |
| 53390000 | Pie, shoo-fly                                                                                                      | 9000_SavorySweet | 22 | 20 | 2   | 2 | 1.5 | E |
| 53105160 | Cake, chocolate, devil's food, or fudge, without icing or filling, made from home recipe or purchased ready-to-eat | 9000_SavorySweet | 22 | 18 | 4   | 2 | 1.5 | E |
| 53345070 | Pie, lemon cream, individual size or tart                                                                          | 9000_SavorySweet | 22 | 18 | 4   | 2 | 2   | D |
| 13210160 | Diplomat pudding, Puerto Rican style                                                                               | 9000_SavorySweet | 22 | 17 | 5   | 3 | 1.5 | D |
| 53346500 | Pie, pineapple cream                                                                                               | 9000_SavorySweet | 22 | 17 | 5   | 2 | 2.5 | C |
| 53116600 | Cake, rice flour, without icing or filling                                                                         | 9000_SavorySweet | 22 | 16 | 6   | 2 | 2   | D |
| 53308000 | Pie, pineapple, two crust                                                                                          | 9000_SavorySweet | 22 | 16 | 6   | 3 | 2.5 | D |
| 53370000 | Pie, chiffon, not chocolate                                                                                        | 9000_SavorySweet | 22 | 16 | 6   | 2 | 2   | D |
| 53450000 | Turnover or dumpling, apple                                                                                        | 9000_SavorySweet | 22 | 15 | 7   | 2 | 2   | D |
| 63420110 | Fruit juice bar, frozen, flavor other than orange                                                                  | 9000_SavorySweet | 21 | 33 | -12 | 4 | 3   | C |
| 63430100 | Sorbet, fruit, noncitrus flavor                                                                                    | 9000_SavorySweet | 21 | 33 | -12 | 4 | 3   | C |
| 91718000 | Honey-combed hard candy with peanut butter                                                                         | 9000_SavorySweet | 21 | 31 | -10 | 4 | 0.5 | E |
| 91718050 | Honey-combed hard candy with peanut butter, chocolate covered                                                      | 9000_SavorySweet | 21 | 27 | -6  | 4 | 1   | E |
| 54102010 | Graham crackers                                                                                                    | 9000_SavorySweet | 21 | 26 | -5  | 4 | 2   | D |
| 54102015 | Graham crackers (Teddy Grahams)                                                                                    | 9000_SavorySweet | 21 | 26 | -5  | 4 | 2   | D |
| 91705050 | Milk chocolate candy, with fruit and nuts                                                                          | 9000_SavorySweet | 21 | 26 | -5  | 4 | 1   | E |
| 53366000 | Pie, yogurt, frozen                                                                                                | 9000_SavorySweet | 21 | 25 | -4  | 3 | 2   | D |
| 54402700 | Pita chips                                                                                                         | 9000_SavorySweet | 21 | 23 | -2  | 4 | 2.5 | D |
| 54430010 | Yogurt chips                                                                                                       | 9000_SavorySweet | 21 | 23 | -2  | 4 | 2   | D |
| 13130340 | Light ice cream, no sugar added, chocolate                                                                         | 9000_SavorySweet | 21 | 22 | -1  | 4 | 3   | C |
| 13160150 | Fat free ice cream, no sugar added, chocolate                                                                      | 9000_SavorySweet | 21 | 22 | -1  | 4 | 3   | C |
| 54401075 | Tortilla chips, plain                                                                                              | 9000_SavorySweet | 21 | 22 | -1  | 4 | 3.5 | C |
| 54401080 | Salty snacks, corn or cornmeal base, tortilla chips                                                                | 9000_SavorySweet | 21 | 22 | -1  | 4 | 3.5 | C |
| 54420010 | Multigrain mixture, pretzels, cereal and/or crackers, nuts                                                         | 9000_SavorySweet | 21 | 22 | -1  | 4 | 2.5 | D |
| 91501040 | Gelatin dessert with fruit and whipped cream                                                                       | 9000_SavorySweet | 21 | 22 | -1  | 3 | 3   | C |
| 91550100 | Coconut cream cake, Puerto Rican style                                                                             | 9000_SavorySweet | 21 | 22 | -1  | 2 | 1   | E |
| 13252100 | Coconut custard, Puerto Rican style                                                                                | 9000_SavorySweet | 21 | 20 | 1   | 2 | 1.5 | E |
| 53118500 | Cake, torte                                                                                                        | 9000_SavorySweet | 21 | 20 | 1   | 3 | 2   | D |
| 53120400 | Cake, white, eggless, lowfat                                                                                       | 9000_SavorySweet | 21 | 20 | 1   | 2 | 1.5 | E |
| 53115410 | Cake or cupcake, oatmeal                                                                                           | 9000_SavorySweet | 21 | 19 | 2   | 2 | 1.5 | E |
| 53116570 | Cake, Ravani                                                                                                       | 9000_SavorySweet | 21 | 19 | 2   | 2 | 2   | D |
| 53308500 | Pie, prune, one crust                                                                                              | 9000_SavorySweet | 21 | 19 | 2   | 2 | 2   | D |
| 13210820 | Fresh corn custard, Puerto Rican style                                                                             | 9000_SavorySweet | 21 | 18 | 3   | 2 | 0.5 | E |
| 53301500 | Pie, apple, one crust                                                                                              | 9000_SavorySweet | 21 | 18 | 3   | 2 | 2.5 | D |
| 91511050 | Gelatin dessert, dietetic, with cream cheese, sweetened with low calorie sweetener                                 | 9000_SavorySweet | 21 | 13 | 8   | 3 | 3.5 | B |

|          |                                                                                                          |                  |    |    |     |   |     |   |
|----------|----------------------------------------------------------------------------------------------------------|------------------|----|----|-----|---|-----|---|
| 63203700 | Blueberry pie filling                                                                                    | 9000_SavorySweet | 20 | 31 | -11 | 4 | 2.5 | D |
| 41480010 | Tofu, frozen dessert, chocolate                                                                          | 9000_SavorySweet | 20 | 27 | -7  | 4 | 3   | D |
| 91733000 | Peanut brittle                                                                                           | 9000_SavorySweet | 20 | 27 | -7  | 4 | 1   | E |
| 13140110 | Light ice cream, bar or stick, chocolate covered, with nuts                                              | 9000_SavorySweet | 20 | 25 | -5  | 4 | 1.5 | E |
| 53260300 | Cookie, sandwich, sugar free                                                                             | 9000_SavorySweet | 20 | 22 | -2  | 4 | 2.5 | D |
| 51168000 | Bread, Spanish coffee                                                                                    | 9000_SavorySweet | 20 | 21 | -1  | 4 | 3.5 | C |
| 54402610 | Potato chips, restructured, multigrain                                                                   | 9000_SavorySweet | 20 | 21 | -1  | 4 | 3   | D |
| 13220120 | Pudding, chocolate, made from dry mix                                                                    | 9000_SavorySweet | 20 | 19 | 1   | 3 | 2.5 | C |
| 53102000 | Cake, applesauce, NS as to icing                                                                         | 9000_SavorySweet | 20 | 19 | 1   | 2 | 1.5 | E |
| 53105050 | Cake, chocolate, devil's food, or fudge, made from home recipe or purchased ready-to-eat, NS as to icing | 9000_SavorySweet | 20 | 19 | 1   | 2 | 1   | E |
| 53119000 | Cake, pineapple, upside down                                                                             | 9000_SavorySweet | 20 | 17 | 3   | 2 | 1   | E |
| 53104300 | Cake, carrot, diet                                                                                       | 9000_SavorySweet | 20 | 16 | 4   | 4 | 3   | D |
| 53420300 | Air filled fritter or fried puff, without syrup, Puerto Rican style                                      | 9000_SavorySweet | 20 | 16 | 4   | 2 | 1   | E |
| 53430700 | Tamale, sweet                                                                                            | 9000_SavorySweet | 20 | 15 | 5   | 2 | 2.5 | D |
| 41480000 | Tofu, frozen dessert, flavors other than chocolate                                                       | 9000_SavorySweet | 19 | 30 | -11 | 4 | 2.5 | D |
| 91734450 | Reese's Crispy Crunchy Bar                                                                               | 9000_SavorySweet | 19 | 28 | -9  | 4 | 0.5 | E |
| 54401110 | Tortilla chips, nacho cheese flavor (Doritos)                                                            | 9000_SavorySweet | 19 | 27 | -8  | 4 | 2.5 | D |
| 91726150 | MARS Almond Bar                                                                                          | 9000_SavorySweet | 19 | 27 | -8  | 4 | 1   | E |
| 53521250 | Doughnut, wheat                                                                                          | 9000_SavorySweet | 19 | 23 | -4  | 4 | 2   | D |
| 53115320 | Cake or cupcake, nut, with icing or filling                                                              | 9000_SavorySweet | 19 | 21 | -2  | 3 | 1   | E |
| 54403005 | Popcorn, movie theater, with added butter                                                                | 9000_SavorySweet | 19 | 21 | -2  | 4 | 0.5 | E |
| 54319005 | Crackers, rice and nuts                                                                                  | 9000_SavorySweet | 19 | 20 | -1  | 4 | 3.5 | C |
| 54327950 | Crackers, cylindrical, peanut-butter filled                                                              | 9000_SavorySweet | 19 | 20 | -1  | 4 | 1.5 | E |
| 54328110 | Crackers, sandwich, reduced fat, peanut butter filled                                                    | 9000_SavorySweet | 19 | 19 | 0   | 4 | 2   | D |
| 91802000 | Chewing gum, sugar free                                                                                  | 9000_SavorySweet | 19 | 18 | 1   | 4 | 3.5 | C |
| 53340500 | Pie, cherry, made with cream cheese and sour cream                                                       | 9000_SavorySweet | 19 | 17 | 2   | 2 | 2   | D |
| 53450800 | Turnover or dumpling, lemon                                                                              | 9000_SavorySweet | 19 | 12 | 7   | 2 | 2.5 | D |
| 91708020 | Soft fruit confections                                                                                   | 9000_SavorySweet | 18 | 30 | -12 | 4 | 2   | D |
| 91705200 | Chocolate, semi-sweet morsel                                                                             | 9000_SavorySweet | 18 | 25 | -7  | 4 | 0.5 | E |
| 54328210 | Crackers, sandwich, cheese filled (Ritz)                                                                 | 9000_SavorySweet | 18 | 24 | -6  | 4 | 1.5 | E |
| 91407120 | Sweet potato paste                                                                                       | 9000_SavorySweet | 18 | 24 | -6  | 2 | 1.5 | D |
| 91705300 | Chocolate, sweet or dark                                                                                 | 9000_SavorySweet | 18 | 24 | -6  | 4 | 0.5 | E |
| 13130630 | Light ice cream, soft serve cone, chocolate                                                              | 9000_SavorySweet | 18 | 23 | -5  | 4 | 3   | C |
| 13142000 | Milk dessert bar or stick, frozen, with coconut                                                          | 9000_SavorySweet | 18 | 23 | -5  | 4 | 2.5 | D |
| 54301020 | Crackers, butter, flavored                                                                               | 9000_SavorySweet | 18 | 23 | -5  | 4 | 1.5 | E |
| 54336100 | Crackers, wonton                                                                                         | 9000_SavorySweet | 18 | 22 | -4  | 4 | 2   | D |
| 91304250 | Topping, milk chocolate with cereal                                                                      | 9000_SavorySweet | 18 | 22 | -4  | 4 | 0.5 | E |
| 53108000 | Cake, cupcake, chocolate, NS as to icing                                                                 | 9000_SavorySweet | 18 | 20 | -2  | 3 | 1.5 | E |

|          |                                                                                                                                                                                   |                  |    |    |     |   |     |   |
|----------|-----------------------------------------------------------------------------------------------------------------------------------------------------------------------------------|------------------|----|----|-----|---|-----|---|
| 53115450 | Cake or cupcake, peanut butter                                                                                                                                                    | 9000_SavorySweet | 18 | 20 | -2  | 4 | 1   | E |
| 61113500 | Lemon pie filling                                                                                                                                                                 | 9000_SavorySweet | 18 | 19 | -1  | 2 | 1.5 | E |
| 13230120 | Pudding, flavors other than chocolate, ready-to-eat, sugar free                                                                                                                   | 9000_SavorySweet | 18 | 18 | 0   | 4 | 3.5 | C |
| 53121260 | Cake, yellow, with icing, made from home recipe or purchased ready-to-eat                                                                                                         | 9000_SavorySweet | 18 | 17 | 1   | 2 | 1.5 | E |
| 54201010 | Crackers, matzo, reduced sodium                                                                                                                                                   | 9000_SavorySweet | 18 | 17 | 1   | 4 | 4   | A |
| 54305000 | Crispbread, wheat, no added fat                                                                                                                                                   | 9000_SavorySweet | 18 | 17 | 1   | 4 | 4   | A |
| 54307000 | Crackers, matzo                                                                                                                                                                   | 9000_SavorySweet | 18 | 17 | 1   | 4 | 4   | A |
| 53100070 | Cake batter, raw, not chocolate                                                                                                                                                   | 9000_SavorySweet | 18 | 16 | 2   | 3 | 2   | D |
| 53410860 | Cobbler, pineapple                                                                                                                                                                | 9000_SavorySweet | 18 | 16 | 2   | 2 | 2.5 | C |
| 32120100 | Egg dessert, Puerto Rican style                                                                                                                                                   | 9000_SavorySweet | 18 | 15 | 3   | 2 | 1.5 | E |
| 53420250 | Cream puff, no filling or icing                                                                                                                                                   | 9000_SavorySweet | 18 | 15 | 3   | 4 | 2   | D |
| 13136000 | Ice cream sandwich, made with light, no sugar added ice cream                                                                                                                     | 9000_SavorySweet | 18 | 14 | 4   | 4 | 4   | A |
| 53305700 | Pie, lemon, not cream or meringue                                                                                                                                                 | 9000_SavorySweet | 18 | 14 | 4   | 2 | 1.5 | E |
| 53305720 | Pie, lemon, not cream or meringue, individual size or tart                                                                                                                        | 9000_SavorySweet | 18 | 14 | 4   | 2 | 1.5 | E |
| 91713040 | Fudge, chocolate, with nuts                                                                                                                                                       | 9000_SavorySweet | 17 | 31 | -14 | 4 | 1   | E |
| 91705500 | Mexican chocolate, tablet                                                                                                                                                         | 9000_SavorySweet | 17 | 29 | -12 | 4 | 0.5 | E |
| 53105300 | Cake or cupcake, German chocolate, with icing or filling                                                                                                                          | 9000_SavorySweet | 17 | 26 | -9  | 4 | 1   | E |
| 53205600 | Cookie, caramel coated, with nuts                                                                                                                                                 | 9000_SavorySweet | 17 | 25 | -8  | 4 | 1   | E |
| 54401081 | Cheese flavored corn snacks (Cheetos)                                                                                                                                             | 9000_SavorySweet | 17 | 25 | -8  | 4 | 1.5 | E |
| 54401112 | Tortilla chips, other flavors (Doritos)                                                                                                                                           | 9000_SavorySweet | 17 | 25 | -8  | 4 | 2.5 | D |
| 53105750 | Cake, chocolate, devil's food, or fudge, pudding type mix, made by "cholesterol free" recipe (water, oil and egg whites added to dry mix), with "light" icing, coating or filling | 9000_SavorySweet | 17 | 23 | -6  | 4 | 1.5 | E |
| 54301010 | Crackers, butter, plain                                                                                                                                                           | 9000_SavorySweet | 17 | 23 | -6  | 4 | 1.5 | E |
| 91304300 | Topping, chocolate, hard coating                                                                                                                                                  | 9000_SavorySweet | 17 | 23 | -6  | 4 | 0.5 | E |
| 91104100 | Sugar, cinnamon                                                                                                                                                                   | 9000_SavorySweet | 17 | 22 | -5  | 2 | 1   | D |
| 91304090 | Topping, chocolate flavored hazelnut spread                                                                                                                                       | 9000_SavorySweet | 17 | 22 | -5  | 4 | 0.5 | E |
| 13120140 | Ice cream bar, chocolate                                                                                                                                                          | 9000_SavorySweet | 17 | 21 | -4  | 4 | 1.5 | E |
| 13210750 | Pudding, pumpkin                                                                                                                                                                  | 9000_SavorySweet | 17 | 21 | -4  | 4 | 3   | C |
| 53106050 | Cake, chocolate, devil's food, or fudge, pudding-type mix (oil, eggs, and water added to dry mix), with icing, coating, or filling                                                | 9000_SavorySweet | 17 | 21 | -4  | 4 | 1.5 | E |
| 53300170 | Pie, individual size or tart, NFS                                                                                                                                                 | 9000_SavorySweet | 17 | 21 | -4  | 4 | 2.5 | D |
| 53301070 | Pie, apple, individual size or tart                                                                                                                                               | 9000_SavorySweet | 17 | 21 | -4  | 4 | 2.5 | D |
| 53302070 | Pie, apricot, individual size or tart                                                                                                                                             | 9000_SavorySweet | 17 | 21 | -4  | 4 | 2.5 | D |
| 53308070 | Pie, pineapple, individual size or tart                                                                                                                                           | 9000_SavorySweet | 17 | 21 | -4  | 4 | 2.5 | D |
| 91402000 | Jam, preserve, all flavors                                                                                                                                                        | 9000_SavorySweet | 17 | 21 | -4  | 3 | 2   | D |
| 53105200 | Cake, chocolate, devil's food, or fudge, standard-type mix (eggs and water added to dry mix), with icing, coating, or filling                                                     | 9000_SavorySweet | 17 | 20 | -3  | 3 | 1.5 | E |
| 54205010 | Cracker, snack, low sodium                                                                                                                                                        | 9000_SavorySweet | 17 | 20 | -3  | 4 | 3   | D |
| 54202010 | Crackers, saltine, low sodium                                                                                                                                                     | 9000_SavorySweet | 17 | 19 | -2  | 4 | 3.5 | C |

|          |                                                                                          |                  |    |    |    |   |     |   |
|----------|------------------------------------------------------------------------------------------|------------------|----|----|----|---|-----|---|
| 54205100 | Cracker, snack, reduced fat, reduced sodium                                              | 9000_SavorySweet | 17 | 19 | -2 | 4 | 3.5 | C |
| 54406010 | Onion flavored rings                                                                     | 9000_SavorySweet | 17 | 18 | -1 | 4 | 1.5 | E |
| 53121060 | Cake, yellow, made from home recipe or purchased ready-to- eat, NS as to icing           | 9000_SavorySweet | 17 | 17 | 0  | 2 | 1.5 | E |
| 54404000 | Popcorn chips, plain                                                                     | 9000_SavorySweet | 17 | 17 | 0  | 4 | 3.5 | D |
| 54404010 | Popcorn chips, other flavors                                                             | 9000_SavorySweet | 17 | 17 | 0  | 4 | 3.5 | D |
| 54404020 | Popcorn chips, sweet flavors                                                             | 9000_SavorySweet | 17 | 17 | 0  | 4 | 3.5 | C |
| 53121275 | Cake or cupcake, yellow, without icing or filling                                        | 9000_SavorySweet | 17 | 15 | 2  | 3 | 1.5 | E |
| 13210350 | Flan                                                                                     | 9000_SavorySweet | 17 | 12 | 5  | 2 | 2.5 | D |
| 13210260 | Rice flour cream, Puerto Rican style                                                     | 9000_SavorySweet | 17 | 11 | 6  | 1 | 2.5 | D |
| 53270100 | Cookies, Puerto Rican style                                                              | 9000_SavorySweet | 17 | 8  | 9  | 2 | 1   | E |
| 11460250 | Yogurt, frozen, flavors other than chocolate, with sorbet or sorbet-coated               | 9000_SavorySweet | 16 | 23 | -7 | 4 | 3   | C |
| 53110000 | Cake, fruit cake, light or dark, holiday type cake                                       | 9000_SavorySweet | 16 | 22 | -6 | 4 | 2.5 | D |
| 91705410 | Chocolate, white, with almonds                                                           | 9000_SavorySweet | 16 | 22 | -6 | 4 | 0.5 | E |
| 54001000 | Crackers, NFS                                                                            | 9000_SavorySweet | 16 | 21 | -5 | 4 | 1.5 | E |
| 54102070 | Crackers, Cuca                                                                           | 9000_SavorySweet | 16 | 21 | -5 | 4 | 1.5 | E |
| 54301000 | Cracker, snack                                                                           | 9000_SavorySweet | 16 | 21 | -5 | 4 | 1.5 | E |
| 91301060 | Maple syrup                                                                              | 9000_SavorySweet | 16 | 21 | -5 | 2 | 1.5 | D |
| 91703600 | Espresso coffee beans, chocolate-covered                                                 | 9000_SavorySweet | 16 | 21 | -5 | 4 | 0.5 | E |
| 11461210 | Frozen yogurt bar, vanilla                                                               | 9000_SavorySweet | 16 | 20 | -4 | 4 | 3   | C |
| 51161100 | Roll, sweet, with fruit and nuts, no frosting                                            | 9000_SavorySweet | 16 | 20 | -4 | 4 | 2   | E |
| 51161200 | Roll, sweet, with nuts, no frosting                                                      | 9000_SavorySweet | 16 | 19 | -3 | 4 | 2   | D |
| 53510200 | Danish pastry, with nuts                                                                 | 9000_SavorySweet | 16 | 19 | -3 | 4 | 1.5 | E |
| 54328105 | Crackers, sandwich, peanut butter filled (Ritz)                                          | 9000_SavorySweet | 16 | 19 | -3 | 4 | 1.5 | E |
| 54328200 | Crackers, sandwich, cheese filled                                                        | 9000_SavorySweet | 16 | 18 | -2 | 4 | 1.5 | E |
| 63420200 | Fruit juice bar, frozen, sweetened with low calorie sweetener, flavors other than orange | 9000_SavorySweet | 16 | 18 | -2 | 4 | 3.5 | A |
| 53107000 | Cake, cupcake, NS as to type or icing                                                    | 9000_SavorySweet | 16 | 17 | -1 | 2 | 1   | E |
| 53107200 | Cake, cupcake, NS as to type, with icing                                                 | 9000_SavorySweet | 16 | 17 | -1 | 2 | 1   | E |
| 53260400 | Cookie, sugar or plain, sugar free                                                       | 9000_SavorySweet | 16 | 17 | -1 | 4 | 2   | D |
| 53344000 | Pie, custard                                                                             | 9000_SavorySweet | 16 | 17 | -1 | 4 | 3   | C |
| 51185000 | Croutons                                                                                 | 9000_SavorySweet | 16 | 16 | 0  | 4 | 1.5 | E |
| 53113000 | Cake, jelly roll                                                                         | 9000_SavorySweet | 16 | 16 | 0  | 3 | 1.5 | E |
| 53116490 | Cake, pumpkin, NS as to icing                                                            | 9000_SavorySweet | 16 | 16 | 0  | 3 | 1.5 | E |
| 54408485 | Pretzels, soft, gluten free                                                              | 9000_SavorySweet | 16 | 16 | 0  | 4 | 2.5 | D |
| 53341500 | Pie, buttermilk                                                                          | 9000_SavorySweet | 16 | 13 | 3  | 3 | 1.5 | E |
| 53121160 | Cake, yellow, without icing, made from home recipe or purchased ready-to-eat             | 9000_SavorySweet | 16 | 12 | 4  | 2 | 1.5 | E |
| 54305500 | Crispbread, wheat or rye, extra crispy                                                   | 9000_SavorySweet | 16 | 10 | 6  | 4 | 4.5 | B |
| 53116350 | Cake, pound, Puerto Rican style                                                          | 9000_SavorySweet | 16 | 6  | 10 | 2 | 0.5 | E |

|          |                                                          |                  |    |    |     |   |     |   |
|----------|----------------------------------------------------------|------------------|----|----|-----|---|-----|---|
| 11830260 | Milk, malted, dry mix, not reconstituted                 | 9000_SavorySweet | 15 | 28 | -13 | 4 | 0.5 | E |
| 11830160 | Chocolate beverage powder, dry mix, not reconstituted    | 9000_SavorySweet | 15 | 27 | -12 | 4 | 1   | E |
| 91713020 | Fudge, chocolate, chocolate-coated, with nuts            | 9000_SavorySweet | 15 | 25 | -10 | 4 | 0.5 | E |
| 91718110 | Butterfinger Crisp                                       | 9000_SavorySweet | 15 | 24 | -9  | 4 | 0.5 | E |
| 54301030 | Crackers, butter (Ritz)                                  | 9000_SavorySweet | 15 | 23 | -8  | 4 | 1.5 | E |
| 54403160 | Popcorn, chocolate coated                                | 9000_SavorySweet | 15 | 22 | -7  | 4 | 1.5 | E |
| 91703050 | Caramel with nuts and cereal, chocolate covered          | 9000_SavorySweet | 15 | 22 | -7  | 4 | 0.5 | E |
| 11460500 | Frozen yogurt, soft serve, vanilla                       | 9000_SavorySweet | 15 | 21 | -6  | 4 | 2.5 | D |
| 51161050 | Roll, sweet, frosted                                     | 9000_SavorySweet | 15 | 20 | -5  | 4 | 2   | E |
| 11459990 | Frozen yogurt, NFS                                       | 9000_SavorySweet | 15 | 19 | -4  | 4 | 3   | C |
| 11460420 | Yogurt, frozen, NS as to flavor, whole milk              | 9000_SavorySweet | 15 | 19 | -4  | 4 | 3   | C |
| 11461260 | Frozen yogurt cone, vanilla                              | 9000_SavorySweet | 15 | 19 | -4  | 4 | 3   | C |
| 53234010 | Cookie, peanut butter, with oatmeal                      | 9000_SavorySweet | 15 | 19 | -4  | 4 | 1.5 | E |
| 53235000 | Cookie, peanut butter sandwich                           | 9000_SavorySweet | 15 | 19 | -4  | 4 | 1.5 | E |
| 11460000 | Frozen yogurt, vanilla                                   | 9000_SavorySweet | 15 | 18 | -3  | 4 | 3   | C |
| 11460440 | Yogurt, frozen, flavors other than chocolate, whole milk | 9000_SavorySweet | 15 | 18 | -3  | 4 | 3   | C |
| 13110130 | Ice cream, rich, chocolate                               | 9000_SavorySweet | 15 | 18 | -3  | 4 | 1.5 | D |
| 13110470 | Gelato, chocolate                                        | 9000_SavorySweet | 15 | 18 | -3  | 4 | 1.5 | D |
| 53234000 | Cookie, peanut butter                                    | 9000_SavorySweet | 15 | 17 | -2  | 4 | 1   | E |
| 53385000 | Pie, pecan                                               | 9000_SavorySweet | 15 | 17 | -2  | 4 | 2   | D |
| 53385070 | Pie, pecan, individual size or tart                      | 9000_SavorySweet | 15 | 17 | -2  | 4 | 2   | D |
| 11460150 | Yogurt, frozen, NS as to flavor, lowfat milk             | 9000_SavorySweet | 15 | 16 | -1  | 4 | 3   | C |
| 54304000 | Crackers, cheese                                         | 9000_SavorySweet | 15 | 15 | 0   | 4 | 1.5 | E |
| 54304020 | Crackers, cheese (Goldfish)                              | 9000_SavorySweet | 15 | 15 | 0   | 4 | 1.5 | E |
| 91351020 | Topping, dietetic                                        | 9000_SavorySweet | 15 | 13 | 2   | 4 | 3.5 | B |
| 53216000 | Cookie, coconut and nut                                  | 9000_SavorySweet | 15 | 12 | 3   | 2 | 0.5 | E |
| 53118550 | Cake, tres leche                                         | 9000_SavorySweet | 15 | 11 | 4   | 2 | 1.5 | D |
| 53386000 | Pie, pudding, flavors other than chocolate               | 9000_SavorySweet | 15 | 11 | 4   | 3 | 2.5 | C |
| 53107100 | Cake, cupcake, NS as to type, without icing              | 9000_SavorySweet | 15 | 8  | 7   | 2 | 1.5 | E |
| 53420410 | Sopaipilla with syrup or honey                           | 9000_SavorySweet | 15 | 8  | 7   | 2 | 1.5 | E |
| 91703250 | TWIX Chocolate Fudge Cookie Bars                         | 9000_SavorySweet | 14 | 23 | -9  | 4 | 1   | E |
| 54420220 | Snack mix, plain (Chex Mix)                              | 9000_SavorySweet | 14 | 22 | -8  | 4 | 2.5 | D |
| 13120400 | Ice cream bar or stick with fruit                        | 9000_SavorySweet | 14 | 20 | -6  | 4 | 3   | C |
| 53204830 | Cookie, brownie, lowfat, with icing                      | 9000_SavorySweet | 14 | 20 | -6  | 4 | 2   | D |
| 11461300 | Frozen yogurt cone, vanilla, waffle cone                 | 9000_SavorySweet | 14 | 18 | -4  | 4 | 3   | C |
| 91718300 | Ladoo, round ball, Asian-Indian dessert                  | 9000_SavorySweet | 14 | 18 | -4  | 4 | 2.5 | E |
| 91739600 | Raisins, yogurt covered                                  | 9000_SavorySweet | 14 | 18 | -4  | 4 | 0.5 | E |
| 53233030 | Cookie, oatmeal, fat free, with raisins                  | 9000_SavorySweet | 14 | 17 | -3  | 4 | 2.5 | D |
| 53234100 | Cookie, peanut butter, with chocolate                    | 9000_SavorySweet | 14 | 17 | -3  | 4 | 1   | E |

|          |                                                                                       |                  |    |    |     |   |     |   |
|----------|---------------------------------------------------------------------------------------|------------------|----|----|-----|---|-----|---|
| 53521300 | Doughnut, wheat, chocolate covered                                                    | 9000_SavorySweet | 14 | 17 | -3  | 4 | 1.5 | E |
| 51184000 | Breadsticks, hard, NFS                                                                | 9000_SavorySweet | 14 | 16 | -2  | 4 | 2.5 | D |
| 53233040 | Cookie, oatmeal, reduced fat, NS as to raisins                                        | 9000_SavorySweet | 14 | 16 | -2  | 4 | 2.5 | E |
| 11460170 | Yogurt, frozen, flavors other than chocolate, lowfat milk                             | 9000_SavorySweet | 14 | 15 | -1  | 4 | 3   | C |
| 53106500 | Cake, cream, without icing or topping                                                 | 9000_SavorySweet | 14 | 12 | 2   | 3 | 1.5 | E |
| 53121300 | Cake, yellow, pudding-type mix (oil, eggs, and water added to dry mix), without icing | 9000_SavorySweet | 14 | 12 | 2   | 3 | 1.5 | E |
| 13252600 | Tiramisu                                                                              | 9000_SavorySweet | 14 | 10 | 4   | 3 | 1   | E |
| 53120160 | Cake, white, without icing, made from home recipe or purchased ready-to-eat           | 9000_SavorySweet | 14 | 10 | 4   | 2 | 1.5 | E |
| 54319500 | Rice paper                                                                            | 9000_SavorySweet | 14 | 4  | 10  | 3 | 3.5 | C |
| 91708150 | Yogurt covered fruit snacks candy, with added vitamin C                               | 9000_SavorySweet | 13 | 24 | -11 | 4 | 1   | E |
| 91731060 | M&M's Peanut Butter Chocolate Candies                                                 | 9000_SavorySweet | 13 | 24 | -11 | 4 | 0.5 | E |
| 91703030 | Caramel, with nuts                                                                    | 9000_SavorySweet | 13 | 23 | -10 | 4 | 1   | E |
| 91713050 | Fudge, peanut butter                                                                  | 9000_SavorySweet | 13 | 23 | -10 | 4 | 0.5 | E |
| 11830100 | Hot chocolate / Cocoa, dry mix, not reconstituted                                     | 9000_SavorySweet | 13 | 22 | -9  | 4 | 1   | E |
| 91715100 | SNICKERS Bar                                                                          | 9000_SavorySweet | 13 | 21 | -8  | 4 | 0.5 | E |
| 91708160 | Yogurt covered fruit snacks candy rolls, with high vitamin C                          | 9000_SavorySweet | 13 | 20 | -7  | 4 | 2   | E |
| 91739010 | Raisins, chocolate covered                                                            | 9000_SavorySweet | 13 | 19 | -6  | 4 | 1   | E |
| 13120120 | Ice cream bar or stick, rich chocolate ice cream, thick chocolate covering            | 9000_SavorySweet | 13 | 18 | -5  | 4 | 1   | E |
| 53452400 | Pastry, puff                                                                          | 9000_SavorySweet | 13 | 18 | -5  | 4 | 2   | D |
| 91726000 | Nougat, plain                                                                         | 9000_SavorySweet | 13 | 18 | -5  | 4 | 2   | D |
| 13120100 | Ice cream bar, vanilla, chocolate coated                                              | 9000_SavorySweet | 13 | 17 | -4  | 4 | 1.5 | E |
| 53452420 | Pastry, puff, custard or cream filled, iced or not iced                               | 9000_SavorySweet | 13 | 17 | -4  | 4 | 2   | D |
| 11830200 | Milk, malted, dry mix, unfortified, not reconstituted, flavors other than chocolate   | 9000_SavorySweet | 13 | 15 | -2  | 4 | 1   | E |
| 53109000 | Cake, cupcake, not chocolate, NS as to icing                                          | 9000_SavorySweet | 13 | 15 | -2  | 3 | 1.5 | E |
| 13140115 | Light ice cream bar, chocolate                                                        | 9000_SavorySweet | 13 | 14 | -1  | 4 | 2   | D |
| 53233020 | Cookie, oatmeal, with fruit filling                                                   | 9000_SavorySweet | 13 | 14 | -1  | 4 | 2   | D |
| 54304110 | Crackers, cheese, reduced sodium                                                      | 9000_SavorySweet | 13 | 13 | 0   | 4 | 1.5 | E |
| 54440010 | Bagel chips                                                                           | 9000_SavorySweet | 13 | 13 | 0   | 4 | 2.5 | D |
| 54401121 | Tortilla chips, reduced fat, plain                                                    | 9000_SavorySweet | 13 | 12 | 1   | 4 | 3.5 | C |
| 54401122 | Tortilla chips, reduced fat, flavored                                                 | 9000_SavorySweet | 13 | 12 | 1   | 4 | 3.5 | C |
| 53341750 | Pie, chess                                                                            | 9000_SavorySweet | 13 | 8  | 5   | 3 | 0.5 | E |
| 91108000 | Sugar substitute, herbal extract sweetener, powder                                    | 9000_SavorySweet | 13 | 1  | 12  | 2 | 3.5 | B |
| 54401111 | Tortilla chips, cool ranch flavor (Doritos)                                           | 9000_SavorySweet | 12 | 20 | -8  | 4 | 3   | C |
| 51161150 | Roll, sweet, with fruit and nuts, frosted                                             | 9000_SavorySweet | 12 | 18 | -6  | 4 | 1.5 | E |
| 91760200 | Toffee, chocolate-coated, with nuts                                                   | 9000_SavorySweet | 12 | 18 | -6  | 4 | 0.5 | E |
| 11461200 | Frozen yogurt sandwich                                                                | 9000_SavorySweet | 12 | 16 | -4  | 4 | 2.5 | D |
| 53120000 | Cake, white, standard-type mix (egg whites and water added), NS as to icing           | 9000_SavorySweet | 12 | 16 | -4  | 3 | 1   | E |



|          |                                                                                            |                  |    |    |     |   |     |   |
|----------|--------------------------------------------------------------------------------------------|------------------|----|----|-----|---|-----|---|
| 53120200 | Cake, white, standard-type mix (egg whites and water added to mix), with icing             | 9000_SavorySweet | 12 | 16 | -4  | 3 | 1   | E |
| 13120792 | Ice cream cone, chocolate, prepackaged                                                     | 9000_SavorySweet | 12 | 15 | -3  | 4 | 1   | E |
| 53121200 | Cake, yellow, standard-type mix (eggs and water added to dry mix), with icing              | 9000_SavorySweet | 12 | 15 | -3  | 3 | 1.5 | E |
| 53301080 | Pie, apple, fried pie                                                                      | 9000_SavorySweet | 12 | 15 | -3  | 4 | 2.5 | D |
| 53305080 | Pie, cherry, fried pie                                                                     | 9000_SavorySweet | 12 | 15 | -3  | 4 | 2.5 | D |
| 53307080 | Pie, peach, fried pie                                                                      | 9000_SavorySweet | 12 | 15 | -3  | 4 | 2.5 | D |
| 54304005 | Crackers, cheese (Cheez-It)                                                                | 9000_SavorySweet | 12 | 15 | -3  | 4 | 1.5 | E |
| 54202020 | Crackers, saltine, reduced sodium                                                          | 9000_SavorySweet | 12 | 14 | -2  | 4 | 2.5 | D |
| 53104550 | Cheesecake with fruit                                                                      | 9000_SavorySweet | 12 | 13 | -1  | 4 | 2.5 | D |
| 54408487 | Pretzels, soft, gluten free, coated or flavored                                            | 9000_SavorySweet | 12 | 12 | 0   | 4 | 2   | D |
| 13130320 | Light ice cream, no sugar added, NS as to flavor                                           | 9000_SavorySweet | 12 | 11 | 1   | 4 | 3   | C |
| 13130330 | Light ice cream, no sugar added, flavors other than chocolate                              | 9000_SavorySweet | 12 | 11 | 1   | 4 | 3   | C |
| 51161270 | Pan Dulce, with sugar topping                                                              | 9000_SavorySweet | 12 | 11 | 1   | 4 | 3   | D |
| 53114100 | Cake or cupcake, lemon, with icing or filling                                              | 9000_SavorySweet | 12 | 10 | 2   | 3 | 1   | E |
| 53123500 | Cake, shortcake, with whipped topping and fruit, diet                                      | 9000_SavorySweet | 12 | 8  | 4   | 4 | 2   | D |
| 91200005 | Sugar substitute, liquid, NFS                                                              | 9000_SavorySweet | 12 | 8  | 4   | 4 | 3.5 | B |
| 91734400 | Reese's Fast Break                                                                         | 9000_SavorySweet | 11 | 25 | -14 | 4 | 0.5 | E |
| 53105270 | Cake or cupcake, chocolate, devil's food or fudge, with icing or filling                   | 9000_SavorySweet | 11 | 18 | -7  | 4 | 1.5 | E |
| 91715000 | Fudge, caramel and nut, chocolate-coated candy                                             | 9000_SavorySweet | 11 | 17 | -6  | 4 | 0.5 | E |
| 53220000 | Cookie, fruit-filled bar                                                                   | 9000_SavorySweet | 11 | 16 | -5  | 4 | 2   | E |
| 53220010 | Cookie, fruit-filled bar, fat free                                                         | 9000_SavorySweet | 11 | 16 | -5  | 4 | 2   | E |
| 53220020 | Cookie, date bar                                                                           | 9000_SavorySweet | 11 | 16 | -5  | 4 | 2   | E |
| 53220030 | Cookie, fig bar                                                                            | 9000_SavorySweet | 11 | 16 | -5  | 4 | 2   | E |
| 53220040 | Cookie, fig bar, fat free                                                                  | 9000_SavorySweet | 11 | 16 | -5  | 4 | 2   | E |
| 53251100 | Cookie, rugelach                                                                           | 9000_SavorySweet | 11 | 16 | -5  | 4 | 2   | E |
| 91302010 | Honey                                                                                      | 9000_SavorySweet | 11 | 16 | -5  | 2 | 1   | D |
| 91401000 | Jelly, all flavors                                                                         | 9000_SavorySweet | 11 | 16 | -5  | 3 | 2   | D |
| 91705010 | Milk chocolate candy, plain                                                                | 9000_SavorySweet | 11 | 16 | -5  | 4 | 0.5 | E |
| 91705020 | Milk chocolate candy, with cereal                                                          | 9000_SavorySweet | 11 | 16 | -5  | 4 | 0.5 | E |
| 91705420 | Chocolate, white, with cereal                                                              | 9000_SavorySweet | 11 | 16 | -5  | 4 | 0.5 | E |
| 91760500 | Truffles                                                                                   | 9000_SavorySweet | 11 | 15 | -4  | 4 | 0.5 | E |
| 13120300 | Ice cream bar, cake covered                                                                | 9000_SavorySweet | 11 | 14 | -3  | 4 | 2   | D |
| 13120710 | Ice cream cone, chocolate covered, with nuts, flavors other than chocolate                 | 9000_SavorySweet | 11 | 14 | -3  | 4 | 1   | E |
| 53120330 | Cake, white, pudding-type mix (oil, egg whites, and water added to dry mix), without icing | 9000_SavorySweet | 11 | 14 | -3  | 4 | 1.5 | E |
| 53440000 | Strudel, apple                                                                             | 9000_SavorySweet | 11 | 14 | -3  | 4 | 2.5 | D |
| 13130310 | Light ice cream, chocolate                                                                 | 9000_SavorySweet | 11 | 13 | -2  | 4 | 3   | C |
| 13142110 | Light ice cream cone, chocolate, prepackaged                                               | 9000_SavorySweet | 11 | 13 | -2  | 4 | 3   | D |

|          |                                                                                                                           |                  |    |    |     |   |     |   |
|----------|---------------------------------------------------------------------------------------------------------------------------|------------------|----|----|-----|---|-----|---|
| 53105100 | Cake, chocolate, devil's food, or fudge, standard-type mix (eggs and water added to dry mix), without icing or filling    | 9000_SavorySweet | 11 | 13 | -2  | 4 | 1.5 | E |
| 53108100 | Cake, cupcake, chocolate, without icing or filling                                                                        | 9000_SavorySweet | 11 | 13 | -2  | 4 | 1.5 | E |
| 53306000 | Pie, mince, two crust                                                                                                     | 9000_SavorySweet | 11 | 13 | -2  | 4 | 2.5 | D |
| 53415400 | Crisp, cherry                                                                                                             | 9000_SavorySweet | 11 | 13 | -2  | 3 | 2   | D |
| 13142100 | Light ice cream cone, vanilla, prepackaged                                                                                | 9000_SavorySweet | 11 | 12 | -1  | 4 | 3   | C |
| 13220110 | Pudding, flavors other than chocolate, made from dry mix                                                                  | 9000_SavorySweet | 11 | 12 | -1  | 3 | 2.5 | C |
| 53108220 | Snack cake, chocolate, with icing or filling, reduced fat and calories                                                    | 9000_SavorySweet | 11 | 12 | -1  | 4 | 2.5 | E |
| 13140100 | Light ice cream bar, vanilla, chocolate coated                                                                            | 9000_SavorySweet | 11 | 11 | 0   | 4 | 1.5 | D |
| 51161280 | Pan Dulce, with raisins and icing                                                                                         | 9000_SavorySweet | 11 | 11 | 0   | 4 | 3   | D |
| 53120260 | Cake, white, with icing, made from home recipe or purchased ready-to-eat                                                  | 9000_SavorySweet | 11 | 11 | 0   | 2 | 1   | E |
| 53260030 | Cookie, chocolate chip, sugar free                                                                                        | 9000_SavorySweet | 11 | 10 | 1   | 4 | 1.5 | E |
| 54304100 | Crackers, cheese, reduced fat                                                                                             | 9000_SavorySweet | 11 | 10 | 1   | 4 | 1.5 | E |
| 51161250 | Pan Dulce, no topping                                                                                                     | 9000_SavorySweet | 11 | 9  | 2   | 4 | 3   | D |
| 53109220 | Snack cake, not chocolate, with icing or filling, reduced fat and calories                                                | 9000_SavorySweet | 11 | 9  | 2   | 4 | 3   | D |
| 53116650 | Cake, Quezadilla, El Salvadorian style                                                                                    | 9000_SavorySweet | 11 | 9  | 2   | 4 | 3   | D |
| 91601010 | Italian Ice, no sugar added                                                                                               | 9000_SavorySweet | 11 | 9  | 2   | 4 | 3.5 | A |
| 91611100 | Popsicle, no sugar added                                                                                                  | 9000_SavorySweet | 11 | 9  | 2   | 4 | 3.5 | A |
| 91621050 | Snow cone, no sugar added                                                                                                 | 9000_SavorySweet | 11 | 9  | 2   | 4 | 3.5 | A |
| 63420105 | Frozen fruit juice bar                                                                                                    | 9000_SavorySweet | 10 | 22 | -12 | 4 | 3   | C |
| 53100100 | Cake or cupcake, NS as to type                                                                                            | 9000_SavorySweet | 10 | 17 | -7  | 4 | 1.5 | E |
| 53105260 | Cake, chocolate, devil's food, or fudge, with icing, coating, or filling, made from home recipe or purchased ready-to-eat | 9000_SavorySweet | 10 | 17 | -7  | 4 | 1.5 | E |
| 53112000 | Cake, ice cream and cake roll, chocolate                                                                                  | 9000_SavorySweet | 10 | 17 | -7  | 4 | 1.5 | E |
| 13121120 | Banana split                                                                                                              | 9000_SavorySweet | 10 | 16 | -6  | 4 | 2.5 | D |
| 53104580 | Cheesecake -type dessert, made with yogurt, with fruit                                                                    | 9000_SavorySweet | 10 | 16 | -6  | 4 | 2.5 | C |
| 13120790 | Ice cream cone, vanilla, prepackaged                                                                                      | 9000_SavorySweet | 10 | 14 | -4  | 4 | 1   | E |
| 53237000 | Cookie, raisin                                                                                                            | 9000_SavorySweet | 10 | 14 | -4  | 4 | 1   | E |
| 91304020 | Topping, chocolate                                                                                                        | 9000_SavorySweet | 10 | 14 | -4  | 4 | 1.5 | E |
| 51160010 | Roll, sweet, toasted                                                                                                      | 9000_SavorySweet | 10 | 12 | -2  | 4 | 1.5 | E |
| 51160100 | Roll, sweet, cinnamon bun, no frosting                                                                                    | 9000_SavorySweet | 10 | 12 | -2  | 4 | 2   | E |
| 51161000 | Pan Dulce, with fruit, no frosting                                                                                        | 9000_SavorySweet | 10 | 12 | -2  | 4 | 2   | E |
| 51165000 | Coffee cake, yeast type                                                                                                   | 9000_SavorySweet | 10 | 12 | -2  | 4 | 2   | E |
| 53109300 | Cake, Dobos Torte                                                                                                         | 9000_SavorySweet | 10 | 12 | -2  | 4 | 1   | E |
| 53206050 | Cookie, rich, chocolate chip, with chocolate filling                                                                      | 9000_SavorySweet | 10 | 12 | -2  | 4 | 1   | E |
| 53235500 | Cookie, with peanut butter filling, chocolate-coated                                                                      | 9000_SavorySweet | 10 | 12 | -2  | 4 | 0.5 | E |
| 53243100 | Cookie, rich, all chocolate, with chocolate filling or chocolate chips                                                    | 9000_SavorySweet | 10 | 12 | -2  | 4 | 1   | E |
| 53241600 | Cookie, butter or sugar, with fruit and/or nuts                                                                           | 9000_SavorySweet | 10 | 11 | -1  | 4 | 1.5 | E |
| 54313000 | Crackers, oyster                                                                                                          | 9000_SavorySweet | 10 | 11 | -1  | 4 | 2   | D |

|          |                                                                                  |                  |    |    |     |   |     |   |
|----------|----------------------------------------------------------------------------------|------------------|----|----|-----|---|-----|---|
| 54325000 | Crackers, saltine                                                                | 9000_SavorySweet | 10 | 11 | -1  | 4 | 2   | D |
| 54406200 | Shrimp chips                                                                     | 9000_SavorySweet | 10 | 11 | -1  | 4 | 2   | E |
| 53120060 | Cake, white, made from home recipe or purchased ready-to-eat, NS as to icing     | 9000_SavorySweet | 10 | 10 | 0   | 2 | 1   | E |
| 91511060 | Gelatin dessert, dietetic, with sour cream, sweetened with low calorie sweetener | 9000_SavorySweet | 10 | 10 | 0   | 4 | 3.5 | B |
| 53224000 | Cookie, ladyfinger                                                               | 9000_SavorySweet | 10 | 8  | 2   | 4 | 2   | D |
| 53341000 | Pie, banana cream                                                                | 9000_SavorySweet | 10 | 8  | 2   | 4 | 2.5 | D |
| 53420000 | Cream puff, eclair, custard or cream filled, NS as to icing                      | 9000_SavorySweet | 10 | 8  | 2   | 4 | 1.5 | D |
| 54401150 | Salty snacks, corn or cornmeal base, tortilla chips, lowfat, baked without fat   | 9000_SavorySweet | 10 | 6  | 4   | 4 | 3.5 | C |
| 91351010 | Syrup, dietetic                                                                  | 9000_SavorySweet | 10 | 6  | 4   | 4 | 3.5 | B |
| 91713090 | Fudge, divinity                                                                  | 9000_SavorySweet | 9  | 22 | -13 | 4 | 1   | E |
| 91718200 | Chocolate-flavored sprinkles                                                     | 9000_SavorySweet | 9  | 17 | -8  | 4 | 0.5 | E |
| 13110110 | Ice cream, chocolate                                                             | 9000_SavorySweet | 9  | 16 | -7  | 4 | 2   | D |
| 13120121 | Ice cream bar or stick, rich ice cream, thick chocolate covering                 | 9000_SavorySweet | 9  | 12 | -3  | 4 | 1   | E |
| 13122100 | Ice cream pie, no crust                                                          | 9000_SavorySweet | 9  | 12 | -3  | 4 | 2   | D |
| 53120275 | Cake or cupcake, white, without icing or filling                                 | 9000_SavorySweet | 9  | 12 | -3  | 4 | 1.5 | E |
| 53226500 | Cookie, marshmallow, with rice cereal, no bake                                   | 9000_SavorySweet | 9  | 12 | -3  | 4 | 2   | D |
| 53226600 | Cookie, marshmallow and peanut butter, with oat cereal, no bake                  | 9000_SavorySweet | 9  | 12 | -3  | 4 | 2   | D |
| 53234250 | Cookie, peanut butter with rice cereal, no bake                                  | 9000_SavorySweet | 9  | 12 | -3  | 4 | 2   | D |
| 91706100 | Coconut candy, no chocolate covering                                             | 9000_SavorySweet | 9  | 12 | -3  | 4 | 0.5 | E |
| 53521100 | Doughnut, chocolate, raised or yeast, with chocolate icing                       | 9000_SavorySweet | 9  | 11 | -2  | 4 | 1.5 | E |
| 13130100 | Light ice cream, NFS                                                             | 9000_SavorySweet | 9  | 10 | -1  | 4 | 3   | C |
| 13130300 | Light ice cream, vanilla                                                         | 9000_SavorySweet | 9  | 10 | -1  | 4 | 3   | C |
| 53391150 | Pie shell, chocolate wafer                                                       | 9000_SavorySweet | 9  | 10 | -1  | 4 | 1.5 | E |
| 53520160 | Doughnut, chocolate, with chocolate icing                                        | 9000_SavorySweet | 9  | 10 | -1  | 4 | 1.5 | E |
| 91800100 | Chewing gum, NFS                                                                 | 9000_SavorySweet | 9  | 10 | -1  | 4 | 3   | C |
| 53203000 | Cookie, applesauce                                                               | 9000_SavorySweet | 9  | 9  | 0   | 4 | 1.5 | E |
| 53206550 | Cookie, chocolate, made with oatmeal and coconut, no bake                        | 9000_SavorySweet | 9  | 9  | 0   | 4 | 1.5 | E |
| 53233000 | Cookie, oatmeal                                                                  | 9000_SavorySweet | 9  | 9  | 0   | 4 | 1.5 | E |
| 53233010 | Cookie, oatmeal, with raisins                                                    | 9000_SavorySweet | 9  | 9  | 0   | 4 | 1.5 | E |
| 53233100 | Cookie, oatmeal, with chocolate and peanut butter, no bake                       | 9000_SavorySweet | 9  | 9  | 0   | 4 | 1.5 | E |
| 53236100 | Cookie, pumpkin                                                                  | 9000_SavorySweet | 9  | 9  | 0   | 4 | 1.5 | E |
| 53304000 | Pie, blueberry, two crust                                                        | 9000_SavorySweet | 9  | 9  | 0   | 4 | 3   | C |
| 53391100 | Pie shell, graham cracker                                                        | 9000_SavorySweet | 9  | 8  | 1   | 4 | 1.5 | E |
| 54205030 | Cracker, cheese, low sodium                                                      | 9000_SavorySweet | 9  | 8  | 1   | 4 | 1.5 | E |
| 54308000 | Crackers, milk                                                                   | 9000_SavorySweet | 9  | 8  | 1   | 4 | 2   | D |
| 54319000 | Crackers, rice                                                                   | 9000_SavorySweet | 9  | 7  | 2   | 4 | 3.5 | C |
| 53420100 | Cream puff, eclair, custard or cream filled, not iced                            | 9000_SavorySweet | 9  | 6  | 3   | 4 | 1.5 | D |
| 91713100 | Fudge, brown sugar, peneuche                                                     | 9000_SavorySweet | 8  | 21 | -13 | 4 | 0.5 | E |

|          |                                                                                        |                  |   |    |     |   |     |   |
|----------|----------------------------------------------------------------------------------------|------------------|---|----|-----|---|-----|---|
| 91735000 | Pralines                                                                               | 9000_SavorySweet | 8 | 21 | -13 | 4 | 0.5 | E |
| 91736000 | Pineapple candy, Puerto Rican style                                                    | 9000_SavorySweet | 8 | 21 | -13 | 4 | 1   | D |
| 91703300 | TWIX Peanut Butter Cookie Bars                                                         | 9000_SavorySweet | 8 | 17 | -9  | 4 | 0.5 | E |
| 13121200 | Ice cream sundae, prepackaged type, flavors other than chocolate                       | 9000_SavorySweet | 8 | 15 | -7  | 4 | 2.5 | D |
| 13127010 | Dippin' Dots, flash frozen ice cream snacks, chocolate                                 | 9000_SavorySweet | 8 | 15 | -7  | 4 | 2   | D |
| 53382000 | Pie, chocolate-marshmallow                                                             | 9000_SavorySweet | 8 | 15 | -7  | 4 | 1   | E |
| 54403110 | Popcorn, caramel coated                                                                | 9000_SavorySweet | 8 | 15 | -7  | 4 | 1   | E |
| 91501100 | Gelatin salad with vegetables                                                          | 9000_SavorySweet | 8 | 15 | -7  | 4 | 3.5 | C |
| 91734300 | Reese's Sticks                                                                         | 9000_SavorySweet | 8 | 15 | -7  | 4 | 0.5 | E |
| 13110112 | Ice cream, chocolate, with additional ingredients                                      | 9000_SavorySweet | 8 | 14 | -6  | 4 | 1.5 | D |
| 13120110 | Ice cream candy bar                                                                    | 9000_SavorySweet | 8 | 14 | -6  | 4 | 1   | E |
| 13120770 | Ice cream cone, scooped, chocolate                                                     | 9000_SavorySweet | 8 | 14 | -6  | 4 | 2   | D |
| 13120775 | Ice cream cone, scooped, chocolate, waffle cone                                        | 9000_SavorySweet | 8 | 14 | -6  | 4 | 2   | D |
| 53204600 | Cookie, brownie, with peanut butter fudge icing                                        | 9000_SavorySweet | 8 | 14 | -6  | 4 | 1.5 | E |
| 13110000 | Ice cream, NFS                                                                         | 9000_SavorySweet | 8 | 13 | -5  | 4 | 2   | D |
| 13127000 | Dippin' Dots, flash frozen ice cream snacks, flavors other than chocolate              | 9000_SavorySweet | 8 | 13 | -5  | 4 | 2   | D |
| 13140660 | Light ice cream, sundae, soft serve, chocolate or fudge topping, without whipped cream | 9000_SavorySweet | 8 | 13 | -5  | 4 | 2.5 | D |
| 13140900 | Fudgesicle                                                                             | 9000_SavorySweet | 8 | 13 | -5  | 4 | 2.5 | C |
| 11461000 | Yogurt, frozen, chocolate-coated                                                       | 9000_SavorySweet | 8 | 12 | -4  | 4 | 1   | E |
| 51161020 | Roll, sweet, with fruit, frosted                                                       | 9000_SavorySweet | 8 | 12 | -4  | 4 | 1.5 | E |
| 53520120 | Doughnut, chocolate                                                                    | 9000_SavorySweet | 8 | 10 | -2  | 4 | 1   | E |
| 53233060 | Cookie, oatmeal, with chocolate chips                                                  | 9000_SavorySweet | 8 | 9  | -1  | 4 | 1.5 | E |
| 53386250 | Pie, pudding, chocolate, with chocolate coating, individual size                       | 9000_SavorySweet | 8 | 9  | -1  | 4 | 1.5 | E |
| 53521120 | Doughnut, chocolate, raised or yeast                                                   | 9000_SavorySweet | 8 | 8  | 0   | 4 | 1.5 | E |
| 13252590 | Trifle                                                                                 | 9000_SavorySweet | 8 | 6  | 2   | 4 | 2.5 | D |
| 53103600 | Cake, butter, with icing                                                               | 9000_SavorySweet | 8 | 6  | 2   | 3 | 0.5 | E |
| 54336000 | Crackers, water                                                                        | 9000_SavorySweet | 8 | 4  | 4   | 4 | 3.5 | C |
| 54408475 | Pretzels, soft, from school lunch                                                      | 9000_SavorySweet | 8 | 4  | 4   | 4 | 4   | B |
| 63420100 | Fruit juice bar, frozen, orange flavor                                                 | 9000_SavorySweet | 7 | 19 | -12 | 4 | 3   | C |
| 63430110 | Sorbet, fruit, citrus flavor                                                           | 9000_SavorySweet | 7 | 19 | -12 | 4 | 3   | C |
| 11830250 | Milk, malted, dry mix, unfortified, not reconstituted, chocolate                       | 9000_SavorySweet | 7 | 15 | -8  | 4 | 1.5 | E |
| 91703150 | Toblerone, milk chocolate with honey and almond nougat                                 | 9000_SavorySweet | 7 | 15 | -8  | 4 | 0.5 | E |
| 53209050 | Cookie, chocolate-covered, chocolate sandwich                                          | 9000_SavorySweet | 7 | 14 | -7  | 4 | 0.5 | E |
| 91718100 | Butterfinger                                                                           | 9000_SavorySweet | 7 | 14 | -7  | 4 | 0.5 | E |
| 13110100 | Ice cream, vanilla                                                                     | 9000_SavorySweet | 7 | 13 | -6  | 4 | 2   | D |
| 13110102 | Ice cream, vanilla, with additional ingredients                                        | 9000_SavorySweet | 7 | 13 | -6  | 4 | 2   | D |
| 13110200 | Ice cream, soft serve, vanilla                                                         | 9000_SavorySweet | 7 | 13 | -6  | 4 | 2.5 | C |
| 13110220 | Ice cream, soft serve, NS as to flavor                                                 | 9000_SavorySweet | 7 | 13 | -6  | 4 | 2   | D |

|          |                                                                                                                                                                              |                  |   |    |     |   |     |   |
|----------|------------------------------------------------------------------------------------------------------------------------------------------------------------------------------|------------------|---|----|-----|---|-----|---|
| 13120760 | Ice cream cone, chocolate covered or dipped, chocolate ice cream                                                                                                             | 9000_SavorySweet | 7 | 13 | -6  | 4 | 2   | D |
| 13120720 | Ice cream cone, chocolate covered or dipped, flavors other than chocolate                                                                                                    | 9000_SavorySweet | 7 | 12 | -5  | 4 | 2   | D |
| 13120735 | Ice cream cone, scooped, vanilla, waffle cone                                                                                                                                | 9000_SavorySweet | 7 | 12 | -5  | 4 | 2   | D |
| 13120782 | Ice cream cone, soft serve, vanilla                                                                                                                                          | 9000_SavorySweet | 7 | 12 | -5  | 4 | 3   | D |
| 13121000 | Ice cream sundae, NFS                                                                                                                                                        | 9000_SavorySweet | 7 | 12 | -5  | 4 | 2   | D |
| 13121300 | Ice cream sundae, hot fudge topping                                                                                                                                          | 9000_SavorySweet | 7 | 12 | -5  | 4 | 2   | D |
| 53115200 | Cake or cupcake, marble, with icing or filling                                                                                                                               | 9000_SavorySweet | 7 | 12 | -5  | 4 | 1.5 | E |
| 53210900 | Cookie, graham cracker with chocolate and marshmallow                                                                                                                        | 9000_SavorySweet | 7 | 12 | -5  | 4 | 1   | E |
| 13140600 | Light ice cream, sundae, soft serve, chocolate or fudge topping, with whipped cream                                                                                          | 9000_SavorySweet | 7 | 11 | -4  | 4 | 2   | D |
| 53206000 | Cookie, chocolate chip                                                                                                                                                       | 9000_SavorySweet | 7 | 11 | -4  | 4 | 1   | E |
| 53211000 | Cookie bar, with chocolate, nuts, and graham crackers                                                                                                                        | 9000_SavorySweet | 7 | 11 | -4  | 4 | 1   | E |
| 53227000 | Cookie, marshmallow pies, non-chocolate coating                                                                                                                              | 9000_SavorySweet | 7 | 11 | -4  | 4 | 1.5 | E |
| 53242500 | Cookie, toffee bar                                                                                                                                                           | 9000_SavorySweet | 7 | 11 | -4  | 4 | 1   | E |
| 91404000 | Marmalade, all flavors                                                                                                                                                       | 9000_SavorySweet | 7 | 11 | -4  | 3 | 1.5 | D |
| 91726410 | Nougat, chocolate covered                                                                                                                                                    | 9000_SavorySweet | 7 | 11 | -4  | 4 | 1.5 | E |
| 13122500 | Ice cream pie, with cookie crust, fudge topping, and whipped cream                                                                                                           | 9000_SavorySweet | 7 | 10 | -3  | 4 | 2   | D |
| 53105600 | Cake, chocolate, devil's food, or fudge, pudding-type mix, made by "Lite" recipe (eggs and water added to dry mix, no oil added to dry mix), with icing, coating, or filling | 9000_SavorySweet | 7 | 10 | -3  | 4 | 1.5 | E |
| 53121280 | Cake, yellow, pudding-type mix (oil, eggs, and water added to dry mix), NS as to icing                                                                                       | 9000_SavorySweet | 7 | 10 | -3  | 4 | 1.5 | E |
| 53121330 | Cake, yellow, pudding-type mix (oil, eggs, and water added to dry mix), with icing                                                                                           | 9000_SavorySweet | 7 | 10 | -3  | 4 | 1.5 | E |
| 53201000 | Cookie, NFS                                                                                                                                                                  | 9000_SavorySweet | 7 | 10 | -3  | 4 | 1   | E |
| 53205260 | Cookie, bar, with chocolate                                                                                                                                                  | 9000_SavorySweet | 7 | 10 | -3  | 4 | 1   | E |
| 13135000 | Light ice cream sandwich, vanilla                                                                                                                                            | 9000_SavorySweet | 7 | 9  | -2  | 4 | 2.5 | D |
| 13135010 | Light ice cream sandwich, chocolate                                                                                                                                          | 9000_SavorySweet | 7 | 9  | -2  | 4 | 2   | D |
| 53610250 | Coffee cake, crumb or quick-bread type, custard filled                                                                                                                       | 9000_SavorySweet | 7 | 9  | -2  | 4 | 2   | D |
| 53520150 | Doughnut, cake type, chocolate covered, dipped in peanuts                                                                                                                    | 9000_SavorySweet | 7 | 8  | -1  | 4 | 1   | E |
| 51166100 | Croissant, cheese                                                                                                                                                            | 9000_SavorySweet | 7 | 6  | 1   | 4 | 1.5 | E |
| 51187020 | Anisette toast                                                                                                                                                               | 9000_SavorySweet | 7 | 6  | 1   | 4 | 3   | D |
| 51188500 | Zwieback toast                                                                                                                                                               | 9000_SavorySweet | 7 | 6  | 1   | 4 | 3   | D |
| 51161030 | Roll, sweet, with fruit, frosted, diet                                                                                                                                       | 9000_SavorySweet | 7 | 5  | 2   | 4 | 0.5 | E |
| 53365000 | Pie, vanilla cream                                                                                                                                                           | 9000_SavorySweet | 7 | 5  | 2   | 4 | 2.5 | D |
| 53511000 | Danish pastry, with cheese                                                                                                                                                   | 9000_SavorySweet | 7 | 5  | 2   | 4 | 2   | D |
| 13210290 | Pudding, flavors other than chocolate, low calorie, containing artificial sweetener, NS as to from dry mix or ready-to-eat                                                   | 9000_SavorySweet | 7 | 4  | 3   | 4 | 3   | C |
| 51187000 | Melba toast                                                                                                                                                                  | 9000_SavorySweet | 7 | 3  | 4   | 4 | 4   | C |
| 91713080 | Fudge, vanilla, with nuts                                                                                                                                                    | 9000_SavorySweet | 6 | 20 | -14 | 4 | 0.5 | E |
| 91734200 | Reese's Pieces                                                                                                                                                               | 9000_SavorySweet | 6 | 18 | -12 | 4 | 0.5 | E |

|          |                                                                                         |                  |   |    |    |   |     |   |
|----------|-----------------------------------------------------------------------------------------|------------------|---|----|----|---|-----|---|
| 53420210 | Cream puff, eclair, custard or cream filled, iced, reduced fat                          | 9000_SavorySweet | 6 | 14 | -8 | 4 | 2   | D |
| 13110210 | Ice cream, soft serve, chocolate                                                        | 9000_SavorySweet | 6 | 12 | -6 | 4 | 2.5 | D |
| 91706000 | Coconut candy, chocolate covered                                                        | 9000_SavorySweet | 6 | 12 | -6 | 4 | 0.5 | E |
| 13120730 | Ice cream cone, scooped, vanilla                                                        | 9000_SavorySweet | 6 | 11 | -5 | 4 | 2.5 | D |
| 13120740 | Ice cream cone, NFS                                                                     | 9000_SavorySweet | 6 | 11 | -5 | 4 | 2   | D |
| 13140450 | Light ice cream, cone, NFS                                                              | 9000_SavorySweet | 6 | 11 | -5 | 4 | 3   | C |
| 13140500 | Light ice cream, cone, flavors other than chocolate                                     | 9000_SavorySweet | 6 | 11 | -5 | 4 | 3   | C |
| 13140550 | Light ice cream, cone, chocolate                                                        | 9000_SavorySweet | 6 | 11 | -5 | 4 | 3   | C |
| 53108200 | Snack cake, chocolate, with icing or filling                                            | 9000_SavorySweet | 6 | 11 | -5 | 4 | 1.5 | E |
| 53208000 | Cookie, marshmallow, chocolate-covered                                                  | 9000_SavorySweet | 6 | 11 | -5 | 4 | 1.5 | E |
| 53208200 | Cookie, marshmallow pie, chocolate covered                                              | 9000_SavorySweet | 6 | 11 | -5 | 4 | 1.5 | E |
| 53226000 | Cookie, marshmallow, with coconut                                                       | 9000_SavorySweet | 6 | 11 | -5 | 4 | 1.5 | E |
| 13130610 | Light ice cream, soft serve, chocolate                                                  | 9000_SavorySweet | 6 | 10 | -4 | 4 | 3   | C |
| 53120350 | Cake, white, pudding-type mix (oil, egg whites, and water added to dry mix), with icing | 9000_SavorySweet | 6 | 10 | -4 | 4 | 1.5 | E |
| 53204840 | Cookie, brownie, reduced fat, NS as to icing                                            | 9000_SavorySweet | 6 | 10 | -4 | 4 | 2.5 | D |
| 53204860 | Cookie, brownie, fat free, NS as to icing                                               | 9000_SavorySweet | 6 | 10 | -4 | 4 | 2.5 | D |
| 53209010 | Cookie, sugar wafer, chocolate-covered                                                  | 9000_SavorySweet | 6 | 10 | -4 | 4 | 0.5 | E |
| 53209015 | Cookie, chocolate sandwich                                                              | 9000_SavorySweet | 6 | 10 | -4 | 4 | 1   | E |
| 53209100 | Cookie, chocolate, sandwich, with extra filling                                         | 9000_SavorySweet | 6 | 10 | -4 | 4 | 1   | E |
| 53209500 | Cookie, chocolate and vanilla sandwich                                                  | 9000_SavorySweet | 6 | 10 | -4 | 4 | 1   | E |
| 54102020 | Graham crackers, chocolate covered                                                      | 9000_SavorySweet | 6 | 10 | -4 | 4 | 0.5 | E |
| 13126000 | Ice cream, fried                                                                        | 9000_SavorySweet | 6 | 9  | -3 | 4 | 2   | D |
| 53114000 | Cake or cupcake, lemon, without icing or filling                                        | 9000_SavorySweet | 6 | 8  | -2 | 4 | 1.5 | E |
| 53233050 | Cookie, oatmeal sandwich, with creme filling                                            | 9000_SavorySweet | 6 | 8  | -2 | 4 | 1.5 | E |
| 53233080 | Cookie, oatmeal sandwich, with peanut butter and jelly filling                          | 9000_SavorySweet | 6 | 8  | -2 | 4 | 1.5 | E |
| 53237010 | Cookie, raisin sandwich, cream-filled                                                   | 9000_SavorySweet | 6 | 8  | -2 | 4 | 1.5 | E |
| 53307000 | Pie, peach, two crust                                                                   | 9000_SavorySweet | 6 | 8  | -2 | 4 | 2.5 | C |
| 53239100 | Pocky                                                                                   | 9000_SavorySweet | 6 | 7  | -1 | 4 | 1.5 | E |
| 53386500 | Pie, pudding, flavors other than chocolate, with chocolate coating, individual size     | 9000_SavorySweet | 6 | 7  | -1 | 4 | 1.5 | E |
| 53453150 | Empanada, Mexican turnover, fruit-filled                                                | 9000_SavorySweet | 6 | 7  | -1 | 4 | 2.5 | D |
| 13140000 | Light ice cream bar, vanilla                                                            | 9000_SavorySweet | 6 | 6  | 0  | 4 | 1.5 | D |
| 53247050 | Cookie, vanilla wafer, reduced fat                                                      | 9000_SavorySweet | 6 | 6  | 0  | 4 | 1.5 | E |
| 53510000 | Danish pastry, plain or spice                                                           | 9000_SavorySweet | 6 | 6  | 0  | 4 | 1.5 | E |
| 53610000 | Coffee cake, NFS                                                                        | 9000_SavorySweet | 6 | 6  | 0  | 4 | 1.5 | E |
| 53391000 | Pie shell                                                                               | 9000_SavorySweet | 6 | 5  | 1  | 4 | 1.5 | E |
| 53452500 | Pastry, mainly flour and water, fried                                                   | 9000_SavorySweet | 6 | 5  | 1  | 4 | 1.5 | E |
| 51167000 | Brioche                                                                                 | 9000_SavorySweet | 6 | 3  | 3  | 4 | 1   | E |
| 53386050 | Pie, pudding, flavors other than chocolate, individual size or tart                     | 9000_SavorySweet | 6 | 3  | 3  | 4 | 2   | D |

|          |                                                                                                           |                  |   |    |    |   |     |   |
|----------|-----------------------------------------------------------------------------------------------------------|------------------|---|----|----|---|-----|---|
| 54408030 | Pretzels, hard, plain, unsalted                                                                           | 9000_SavorySweet | 6 | 3  | 3  | 4 | 3.5 | C |
| 13220230 | Pudding, ready-to-eat, chocolate, reduced fat                                                             | 9000_SavorySweet | 5 | 13 | -8 | 4 | 3   | C |
| 13220235 | Pudding, ready-to-eat, chocolate, fat free                                                                | 9000_SavorySweet | 5 | 13 | -8 | 4 | 3   | C |
| 53204850 | Cookie, brownie, fat free, cholesterol free, with icing                                                   | 9000_SavorySweet | 5 | 13 | -8 | 4 | 2   | E |
| 13120510 | Ice cream sandwich, chocolate                                                                             | 9000_SavorySweet | 5 | 11 | -6 | 4 | 1.5 | E |
| 13120786 | Ice cream cone, soft serve, vanilla, waffle cone                                                          | 9000_SavorySweet | 5 | 10 | -5 | 4 | 3   | D |
| 13121100 | Ice cream sundae, fruit topping                                                                           | 9000_SavorySweet | 5 | 10 | -5 | 4 | 2.5 | D |
| 13130700 | Soft serve, blended with candy or cookies, from fast food                                                 | 9000_SavorySweet | 5 | 10 | -5 | 4 | 2.5 | D |
| 13161500 | Milk dessert sandwich bar, frozen, made from lowfat milk                                                  | 9000_SavorySweet | 5 | 10 | -5 | 4 | 3   | C |
| 13161520 | Milk dessert sandwich bar, frozen, with low-calorie sweetener, made from lowfat milk                      | 9000_SavorySweet | 5 | 10 | -5 | 4 | 2   | D |
| 53209020 | Cookie, chocolate sandwich, reduced fat                                                                   | 9000_SavorySweet | 5 | 10 | -5 | 4 | 1.5 | E |
| 91746010 | Sugar-coated chocolate discs                                                                              | 9000_SavorySweet | 5 | 10 | -5 | 4 | 0.5 | E |
| 91746150 | Easter egg, candy coated chocolate                                                                        | 9000_SavorySweet | 5 | 10 | -5 | 4 | 0.5 | E |
| 53243010 | Cookie, vanilla sandwich, extra filling                                                                   | 9000_SavorySweet | 5 | 9  | -4 | 4 | 1   | E |
| 13121500 | Ice cream sundae, fudge topping, with cake, with whipped cream                                            | 9000_SavorySweet | 5 | 8  | -3 | 4 | 2   | E |
| 51161070 | Roll, sweet, with fruit, frosted, fat free                                                                | 9000_SavorySweet | 5 | 8  | -3 | 4 | 2   | D |
| 13210410 | Pudding, rice                                                                                             | 9000_SavorySweet | 5 | 5  | 0  | 4 | 3   | C |
| 53222020 | Cookie, cone shell, ice cream type, wafer or cake                                                         | 9000_SavorySweet | 5 | 4  | 1  | 4 | 3.5 | C |
| 53236000 | Cookie, Pizzelle                                                                                          | 9000_SavorySweet | 5 | 4  | 1  | 4 | 3.5 | C |
| 53305000 | Pie, cherry, two crust                                                                                    | 9000_SavorySweet | 5 | 4  | 1  | 4 | 2.5 | D |
| 53305070 | Pie, cherry, individual size or tart                                                                      | 9000_SavorySweet | 5 | 4  | 1  | 4 | 2.5 | D |
| 53510100 | Danish pastry, with fruit                                                                                 | 9000_SavorySweet | 5 | 3  | 2  | 4 | 1.5 | E |
| 53520100 | Doughnut, cake type, plain                                                                                | 9000_SavorySweet | 5 | 3  | 2  | 4 | 1   | E |
| 53500100 | Breakfast pastry, NFS                                                                                     | 9000_SavorySweet | 5 | 2  | 3  | 4 | 1.5 | E |
| 58157110 | Spicy rice pudding, Puerto Rican style                                                                    | 9000_SavorySweet | 5 | 2  | 3  | 2 | 2.5 | C |
| 91703350 | Bar None candy bar                                                                                        | 9000_SavorySweet | 4 | 13 | -9 | 4 | 1   | E |
| 53206500 | Cookie, chocolate, made with rice cereal                                                                  | 9000_SavorySweet | 4 | 11 | -7 | 4 | 0.5 | E |
| 53121270 | Cake or cupcake, yellow, with icing or filling                                                            | 9000_SavorySweet | 4 | 10 | -6 | 4 | 1.5 | E |
| 13120500 | Ice cream sandwich, vanilla                                                                               | 9000_SavorySweet | 4 | 9  | -5 | 4 | 1.5 | D |
| 13120784 | Ice cream cone, soft serve, chocolate                                                                     | 9000_SavorySweet | 4 | 9  | -5 | 4 | 2.5 | D |
| 53207000 | Cookie, chocolate or fudge                                                                                | 9000_SavorySweet | 4 | 9  | -5 | 4 | 1   | E |
| 53210000 | Cookie, chocolate wafer                                                                                   | 9000_SavorySweet | 4 | 9  | -5 | 4 | 1   | E |
| 91304030 | Topping, fruit                                                                                            | 9000_SavorySweet | 4 | 9  | -5 | 4 | 2.5 | D |
| 91705090 | Chocolate candy with fondant and caramel                                                                  | 9000_SavorySweet | 4 | 9  | -5 | 4 | 0.5 | E |
| 13120788 | Ice cream cone, soft serve, chocolate, waffle cone                                                        | 9000_SavorySweet | 4 | 8  | -4 | 4 | 2.5 | D |
| 53109270 | Cake, cupcake, chocolate, with or without icing, fruit filling or cream filling, lowfat, cholesterol free | 9000_SavorySweet | 4 | 8  | -4 | 4 | 2   | D |
| 53204500 | Cookie, brownie, with cream cheese filling, without icing                                                 | 9000_SavorySweet | 4 | 8  | -4 | 4 | 1   | E |
| 13140630 | Light ice cream, sundae, soft serve, fruit topping, with whipped cream                                    | 9000_SavorySweet | 4 | 7  | -3 | 4 | 2.5 | D |

|          |                                                                           |                  |   |   |    |   |     |   |
|----------|---------------------------------------------------------------------------|------------------|---|---|----|---|-----|---|
| 53104570 | Cheesecake, diet, with fruit                                              | 9000_SavorySweet | 4 | 7 | -3 | 4 | 2.5 | D |
| 53301750 | Pie, apple, diet                                                          | 9000_SavorySweet | 4 | 7 | -3 | 4 | 3   | D |
| 53381000 | Pie, lemon meringue                                                       | 9000_SavorySweet | 4 | 7 | -3 | 4 | 2.5 | D |
| 53381070 | Pie, lemon meringue, individual size or tart                              | 9000_SavorySweet | 4 | 7 | -3 | 4 | 2.5 | D |
| 91102010 | Sugar, brown                                                              | 9000_SavorySweet | 4 | 7 | -3 | 2 | 0.5 | E |
| 91104200 | Sugar, raw                                                                | 9000_SavorySweet | 4 | 7 | -3 | 2 | 0.5 | E |
| 13120550 | Ice cream cookie sandwich                                                 | 9000_SavorySweet | 4 | 6 | -2 | 4 | 1.5 | D |
| 53101250 | Cake, angel food, with fruit and icing or filling                         | 9000_SavorySweet | 4 | 6 | -2 | 4 | 2.5 | D |
| 53206030 | Cookie, chocolate chip, reduced fat                                       | 9000_SavorySweet | 4 | 6 | -2 | 4 | 1.5 | E |
| 91301200 | Sugar, brown, and water syrup                                             | 9000_SavorySweet | 4 | 6 | -2 | 2 | 1   | D |
| 53520110 | Doughnut, cake type                                                       | 9000_SavorySweet | 4 | 3 | 1  | 4 | 1   | E |
| 53520200 | Churros                                                                   | 9000_SavorySweet | 4 | 3 | 1  | 4 | 1.5 | E |
| 53520600 | Cruller, NFS                                                              | 9000_SavorySweet | 4 | 3 | 1  | 4 | 1   | E |
| 53521220 | Doughnut, chocolate cream-filled                                          | 9000_SavorySweet | 4 | 3 | 1  | 4 | 1.5 | E |
| 53520500 | Doughnut, Asian                                                           | 9000_SavorySweet | 4 | 2 | 2  | 4 | 1   | E |
| 53103550 | Cake, butter, without icing                                               | 9000_SavorySweet | 4 | 1 | 3  | 3 | 1   | E |
| 53204800 | Cookie, brownie, diet, NS as to icing                                     | 9000_SavorySweet | 4 | 1 | 3  | 4 | 3   | C |
| 13130590 | Light ice cream, soft serve, NS as to flavor                              | 9000_SavorySweet | 3 | 9 | -6 | 4 | 3   | C |
| 13130600 | Light ice cream, soft serve, flavors other than chocolate                 | 9000_SavorySweet | 3 | 9 | -6 | 4 | 3   | C |
| 13130620 | Light ice cream, soft serve cone, flavors other than chocolate            | 9000_SavorySweet | 3 | 8 | -5 | 4 | 3   | C |
| 13130640 | Light ice cream, soft serve cone, NS as to flavor                         | 9000_SavorySweet | 3 | 8 | -5 | 4 | 3   | C |
| 13140670 | Light ice cream, sundae, soft serve, fruit topping, without whipped cream | 9000_SavorySweet | 3 | 8 | -5 | 4 | 3   | C |
| 53112100 | Ice cream cake                                                            | 9000_SavorySweet | 3 | 8 | -5 | 4 | 2   | D |
| 13170000 | Baked Alaska                                                              | 9000_SavorySweet | 3 | 7 | -4 | 4 | 2   | D |
| 53209000 | Cookie, chocolate, chocolate sandwich or chocolate-coated or striped      | 9000_SavorySweet | 3 | 7 | -4 | 4 | 1   | E |
| 53247500 | Cookie, vanilla with caramel, coconut, and chocolate coating              | 9000_SavorySweet | 3 | 6 | -3 | 4 | 0.5 | E |
| 53104520 | Cheesecake, diet                                                          | 9000_SavorySweet | 3 | 5 | -2 | 4 | 2.5 | D |
| 53111000 | Cake or cupcake, gingerbread                                              | 9000_SavorySweet | 3 | 5 | -2 | 4 | 1.5 | E |
| 53207020 | Cookie, chocolate or fudge, reduced fat                                   | 9000_SavorySweet | 3 | 5 | -2 | 4 | 1.5 | E |
| 53239050 | Cookie, shortbread, with icing or filling                                 | 9000_SavorySweet | 3 | 5 | -2 | 4 | 1   | E |
| 53104600 | Cheesecake, chocolate                                                     | 9000_SavorySweet | 3 | 4 | -1 | 4 | 1   | E |
| 53206010 | Cookie, chocolate chip, with raisins                                      | 9000_SavorySweet | 3 | 4 | -1 | 4 | 1   | E |
| 53240000 | Cookie, animal                                                            | 9000_SavorySweet | 3 | 4 | -1 | 4 | 2   | D |
| 91109000 | Blue Agave liquid sweetener, sugar substitute                             | 9000_SavorySweet | 3 | 4 | -1 | 2 | 1.5 | D |
| 91302020 | Agave liquid sweetener                                                    | 9000_SavorySweet | 3 | 4 | -1 | 2 | 1.5 | D |
| 32401000 | Meringues                                                                 | 9000_SavorySweet | 3 | 3 | 0  | 2 | 1   | E |
| 51166200 | Croissant, chocolate                                                      | 9000_SavorySweet | 3 | 3 | 0  | 4 | 1   | E |
| 53300100 | Pie, NFS                                                                  | 9000_SavorySweet | 3 | 3 | 0  | 4 | 2.5 | C |



|          |                                                                                       |                  |   |    |    |   |     |   |
|----------|---------------------------------------------------------------------------------------|------------------|---|----|----|---|-----|---|
| 53301000 | Pie, apple, two crust                                                                 | 9000_SavorySweet | 3 | 3  | 0  | 4 | 2.5 | C |
| 53521130 | Doughnut, yeast type, with chocolate icing                                            | 9000_SavorySweet | 3 | 3  | 0  | 4 | 1   | E |
| 53521110 | Doughnut, yeast type                                                                  | 9000_SavorySweet | 3 | 2  | 1  | 4 | 1.5 | E |
| 51166500 | Croissant, fruit                                                                      | 9000_SavorySweet | 3 | 1  | 2  | 4 | 1.5 | E |
| 54408480 | Pretzels, soft, multigrain                                                            | 9000_SavorySweet | 3 | 1  | 2  | 4 | 3.5 | C |
| 91501060 | Gelatin dessert with sour cream                                                       | 9000_SavorySweet | 3 | 1  | 2  | 3 | 3   | C |
| 91511030 | Gelatin dessert, dietetic, with whipped topping, sweetened with low calorie sweetener | 9000_SavorySweet | 3 | 1  | 2  | 4 | 3.5 | A |
| 91713010 | Fudge, chocolate, chocolate-coated                                                    | 9000_SavorySweet | 2 | 10 | -8 | 4 | 0.5 | E |
| 91746100 | M&M's Milk Chocolate Candies                                                          | 9000_SavorySweet | 2 | 10 | -8 | 4 | 0.5 | E |
| 91746120 | Sixlets                                                                               | 9000_SavorySweet | 2 | 10 | -8 | 4 | 0.5 | E |
| 53204000 | Cookie, brownie, NS as to icing                                                       | 9000_SavorySweet | 2 | 6  | -4 | 4 | 1.5 | E |
| 53204010 | Cookie, brownie, without icing                                                        | 9000_SavorySweet | 2 | 6  | -4 | 4 | 1.5 | E |
| 53238000 | Cookie, sandwich-type, not chocolate or vanilla                                       | 9000_SavorySweet | 2 | 6  | -4 | 4 | 1.5 | E |
| 53242000 | Cookie, sugar wafer                                                                   | 9000_SavorySweet | 2 | 6  | -4 | 4 | 0.5 | E |
| 53243000 | Cookie, vanilla sandwich                                                              | 9000_SavorySweet | 2 | 6  | -4 | 4 | 1.5 | E |
| 53247000 | Cookie, vanilla wafer                                                                 | 9000_SavorySweet | 2 | 6  | -4 | 4 | 1.5 | E |
| 54102200 | Graham crackers, sandwich, with filling                                               | 9000_SavorySweet | 2 | 6  | -4 | 4 | 1.5 | E |
| 13140700 | Cremsicle                                                                             | 9000_SavorySweet | 2 | 5  | -3 | 4 | 2.5 | C |
| 53205250 | Cookie, butterscotch, brownie                                                         | 9000_SavorySweet | 2 | 5  | -3 | 4 | 1.5 | E |
| 53245000 | Cookie, vanilla waffle creme                                                          | 9000_SavorySweet | 2 | 5  | -3 | 4 | 0.5 | E |
| 53109100 | Cake, cupcake, not chocolate, without icing or filling                                | 9000_SavorySweet | 2 | 4  | -2 | 4 | 1.5 | D |
| 53121100 | Cake, yellow, standard-type mix (eggs and water added to dry mix), without icing      | 9000_SavorySweet | 2 | 4  | -2 | 4 | 1.5 | D |
| 53237500 | Cookie, rum ball, no bake                                                             | 9000_SavorySweet | 2 | 4  | -2 | 4 | 1   | E |
| 13110460 | Gelato, vanilla                                                                       | 9000_SavorySweet | 2 | 3  | -1 | 4 | 1.5 | E |
| 53202000 | Cookie, almond                                                                        | 9000_SavorySweet | 2 | 3  | -1 | 4 | 1   | E |
| 53235600 | Cookie, Pfeffernusse                                                                  | 9000_SavorySweet | 2 | 3  | -1 | 4 | 1   | E |
| 53239000 | Cookie, shortbread                                                                    | 9000_SavorySweet | 2 | 3  | -1 | 4 | 1   | E |
| 53520135 | Doughnut, cake type, with icing                                                       | 9000_SavorySweet | 2 | 3  | -1 | 4 | 1   | E |
| 53223000 | Cookie, gingersnaps                                                                   | 9000_SavorySweet | 2 | 2  | 0  | 4 | 2   | D |
| 53230000 | Cookie, molasses                                                                      | 9000_SavorySweet | 2 | 2  | 0  | 4 | 1.5 | D |
| 53231000 | Cookie, Lebkuchen                                                                     | 9000_SavorySweet | 2 | 2  | 0  | 4 | 1.5 | D |
| 53520000 | Doughnut, NFS                                                                         | 9000_SavorySweet | 2 | 2  | 0  | 4 | 1   | E |
| 53520130 | Doughnut, cake type, powdered sugar                                                   | 9000_SavorySweet | 2 | 2  | 0  | 4 | 1   | E |
| 53520140 | Doughnut, cake type, chocolate icing                                                  | 9000_SavorySweet | 2 | 2  | 0  | 4 | 1   | E |
| 53520170 | Doughnut holes                                                                        | 9000_SavorySweet | 2 | 2  | 0  | 4 | 1   | E |
| 53521230 | Doughnut, custard-filled, with icing                                                  | 9000_SavorySweet | 2 | 2  | 0  | 4 | 1.5 | E |
| 54102060 | Crackers, Cuban                                                                       | 9000_SavorySweet | 2 | 2  | 0  | 4 | 1.5 | D |
| 51188100 | Pannetone                                                                             | 9000_SavorySweet | 2 | 1  | 1  | 4 | 2   | D |

|          |                                                                                   |                  |   |    |     |   |     |   |
|----------|-----------------------------------------------------------------------------------|------------------|---|----|-----|---|-----|---|
| 53521210 | Doughnut, custard-filled                                                          | 9000_SavorySweet | 2 | 1  | 1   | 4 | 1.5 | E |
| 54408432 | Pretzels, soft, ready-to-eat, topped with cheese                                  | 9000_SavorySweet | 2 | 1  | 1   | 4 | 3.5 | C |
| 54408470 | Pretzels, soft, filled with cheese                                                | 9000_SavorySweet | 2 | 1  | 1   | 4 | 3.5 | C |
| 91301090 | Sorghum syrup                                                                     | 9000_SavorySweet | 1 | 14 | -13 | 4 | 1   | D |
| 91715200 | Baby Ruth                                                                         | 9000_SavorySweet | 1 | 13 | -12 | 4 | 0.5 | E |
| 91707010 | Fondant, chocolate covered                                                        | 9000_SavorySweet | 1 | 9  | -8  | 4 | 1   | E |
| 13150000 | Sherbet, all flavors                                                              | 9000_SavorySweet | 1 | 8  | -7  | 4 | 3   | C |
| 13160410 | Fat free ice cream, chocolate                                                     | 9000_SavorySweet | 1 | 8  | -7  | 4 | 2.5 | D |
| 54403150 | Popcorn, sugar syrup or caramel-coated, fat free                                  | 9000_SavorySweet | 1 | 8  | -7  | 4 | 1   | E |
| 63430150 | Sorbet                                                                            | 9000_SavorySweet | 1 | 8  | -7  | 4 | 2.5 | C |
| 63430500 | Fruit juice bar with cream, frozen                                                | 9000_SavorySweet | 1 | 8  | -7  | 4 | 3   | C |
| 91305010 | Icing, chocolate                                                                  | 9000_SavorySweet | 1 | 8  | -7  | 4 | 0.5 | E |
| 91706400 | Coconut candy, Puerto Rican style                                                 | 9000_SavorySweet | 1 | 8  | -7  | 4 | 0.5 | E |
| 91705030 | Kit Kat                                                                           | 9000_SavorySweet | 1 | 7  | -6  | 4 | 0.5 | E |
| 91705430 | Kit Kat White                                                                     | 9000_SavorySweet | 1 | 7  | -6  | 4 | 0.5 | E |
| 91713030 | Fudge, chocolate                                                                  | 9000_SavorySweet | 1 | 7  | -6  | 4 | 0.5 | E |
| 91801000 | Chewing gum, regular                                                              | 9000_SavorySweet | 1 | 7  | -6  | 4 | 1.5 | E |
| 51165100 | Coffee cake, yeast type, fat free, cholesterol free, with fruit                   | 9000_SavorySweet | 1 | 6  | -5  | 4 | 3   | D |
| 53102800 | Cake or cupcake, Black Forest                                                     | 9000_SavorySweet | 1 | 6  | -5  | 4 | 1.5 | E |
| 53120100 | Cake, white, standard-type mix (egg whites and water added to mix), without icing | 9000_SavorySweet | 1 | 6  | -5  | 4 | 1.5 | E |
| 53204100 | Cookie, brownie, with icing or filling                                            | 9000_SavorySweet | 1 | 6  | -5  | 4 | 1   | E |
| 91703400 | Whatchamacallit                                                                   | 9000_SavorySweet | 1 | 6  | -5  | 4 | 0.5 | E |
| 13121400 | Ice cream sundae, caramel topping                                                 | 9000_SavorySweet | 1 | 5  | -4  | 4 | 2   | D |
| 13230130 | Pudding, chocolate, ready-to-eat                                                  | 9000_SavorySweet | 1 | 5  | -4  | 4 | 3   | C |
| 53215500 | Cookie, coconut                                                                   | 9000_SavorySweet | 1 | 5  | -4  | 4 | 0.5 | E |
| 53225000 | Cookie, macaroon                                                                  | 9000_SavorySweet | 1 | 5  | -4  | 4 | 0.5 | E |
| 91306030 | Chocolate dip                                                                     | 9000_SavorySweet | 1 | 5  | -4  | 4 | 1   | E |
| 91703040 | Caramel candy, chocolate covered                                                  | 9000_SavorySweet | 1 | 5  | -4  | 4 | 0.5 | E |
| 13200110 | Pudding, chocolate, NFS                                                           | 9000_SavorySweet | 1 | 4  | -3  | 4 | 3   | C |
| 13210220 | Pudding, chocolate, NS as to from dry mix or ready-to-eat                         | 9000_SavorySweet | 1 | 4  | -3  | 4 | 3   | C |
| 13210520 | Pudding, tapioca, made from dry mix                                               | 9000_SavorySweet | 1 | 4  | -3  | 4 | 3   | C |
| 13230500 | Pudding, tapioca, ready-to-eat                                                    | 9000_SavorySweet | 1 | 4  | -3  | 4 | 3   | C |
| 53103000 | Cake, Boston cream pie                                                            | 9000_SavorySweet | 1 | 4  | -3  | 4 | 2   | D |
| 53120270 | Cake or cupcake, white, with icing or filling                                     | 9000_SavorySweet | 1 | 4  | -3  | 4 | 1.5 | E |
| 53226550 | Cookie, marshmallow, with rice cereal and chocolate chips                         | 9000_SavorySweet | 1 | 4  | -3  | 4 | 0.5 | E |
| 53342000 | Pie, chocolate cream                                                              | 9000_SavorySweet | 1 | 4  | -3  | 4 | 1   | E |
| 91611050 | Ice pop filled with ice cream, all flavor varieties                               | 9000_SavorySweet | 1 | 4  | -3  | 4 | 3   | C |
| 53116270 | Cake, pound, chocolate                                                            | 9000_SavorySweet | 1 | 3  | -2  | 4 | 1   | E |

|          |                                                                                            |                  |   |   |    |   |     |   |
|----------|--------------------------------------------------------------------------------------------|------------------|---|---|----|---|-----|---|
| 91723010 | Marshmallow, chocolate covered                                                             | 9000_SavorySweet | 1 | 3 | -2 | 4 | 1   | E |
| 91726140 | MILKY WAY MIDNIGHT Bar                                                                     | 9000_SavorySweet | 1 | 3 | -2 | 4 | 0.5 | E |
| 91726425 | 3 Musketeers Truffle Crisp Bar                                                             | 9000_SavorySweet | 1 | 3 | -2 | 4 | 0.5 | E |
| 13110120 | Ice cream, rich, flavors other than chocolate                                              | 9000_SavorySweet | 1 | 2 | -1 | 4 | 1.5 | E |
| 13110140 | Ice cream, rich, NS as to flavor                                                           | 9000_SavorySweet | 1 | 2 | -1 | 4 | 1.5 | E |
| 13230200 | Pudding, ready-to-eat, chocolate and non-chocolate flavors combined                        | 9000_SavorySweet | 1 | 2 | -1 | 4 | 3   | C |
| 53104400 | Cake or cupcake, coconut, with icing or filling                                            | 9000_SavorySweet | 1 | 2 | -1 | 4 | 1   | E |
| 53241510 | Marie biscuit                                                                              | 9000_SavorySweet | 1 | 2 | -1 | 4 | 1.5 | E |
| 53261000 | Cookie, gluten free                                                                        | 9000_SavorySweet | 1 | 2 | -1 | 4 | 0.5 | E |
| 53530000 | Breakfast tart                                                                             | 9000_SavorySweet | 1 | 2 | -1 | 4 | 1.5 | D |
| 91306040 | Dessert dip                                                                                | 9000_SavorySweet | 1 | 2 | -1 | 4 | 1.5 | E |
| 91705400 | Chocolate, white                                                                           | 9000_SavorySweet | 1 | 2 | -1 | 4 | 0.5 | E |
| 13120050 | Ice cream bar, vanilla                                                                     | 9000_SavorySweet | 1 | 1 | 0  | 4 | 1   | E |
| 13120310 | Ice cream bar, stick or nugget, with crunch coating                                        | 9000_SavorySweet | 1 | 1 | 0  | 4 | 1   | E |
| 13140650 | Light ice cream, sundae, soft serve, not fruit or chocolate topping, with whipped cream    | 9000_SavorySweet | 1 | 1 | 0  | 4 | 2   | D |
| 13140680 | Light ice cream, sundae, soft serve, not fruit or chocolate topping, without whipped cream | 9000_SavorySweet | 1 | 1 | 0  | 4 | 2.5 | D |
| 13210280 | Pudding, flavors other than chocolate, NFS                                                 | 9000_SavorySweet | 1 | 1 | 0  | 4 | 2.5 | C |
| 13220240 | Pudding, ready-to-eat, flavors other than chocolate, reduced fat                           | 9000_SavorySweet | 1 | 1 | 0  | 4 | 3   | C |
| 13220245 | Pudding, ready-to-eat, flavors other than chocolate, fat free                              | 9000_SavorySweet | 1 | 1 | 0  | 4 | 3   | C |
| 13230110 | Pudding, flavors other than chocolate, ready-to-eat                                        | 9000_SavorySweet | 1 | 1 | 0  | 4 | 2.5 | C |
| 13230510 | Pudding, ready-to-eat, tapioca, fat free                                                   | 9000_SavorySweet | 1 | 1 | 0  | 4 | 3   | C |
| 13252200 | Milk dessert or milk candy, Puerto Rican style                                             | 9000_SavorySweet | 1 | 1 | 0  | 4 | 1.5 | E |
| 51160000 | Roll, sweet, no frosting                                                                   | 9000_SavorySweet | 1 | 1 | 0  | 4 | 3   | D |
| 51160110 | Roll, sweet, cinnamon bun, frosted                                                         | 9000_SavorySweet | 1 | 1 | 0  | 4 | 0.5 | E |
| 51166000 | Croissant                                                                                  | 9000_SavorySweet | 1 | 1 | 0  | 4 | 1.5 | E |
| 53101100 | Cake, angel food, without icing or filling                                                 | 9000_SavorySweet | 1 | 1 | 0  | 4 | 2   | D |
| 53101200 | Cake, angel food, with icing or filling                                                    | 9000_SavorySweet | 1 | 1 | 0  | 3 | 1   | E |
| 53101300 | Cake, angel food, chocolate, without icing                                                 | 9000_SavorySweet | 1 | 1 | 0  | 4 | 2   | D |
| 53104500 | Cheesecake                                                                                 | 9000_SavorySweet | 1 | 1 | 0  | 4 | 1   | E |
| 53109200 | Snack cake, not chocolate, with icing or filling                                           | 9000_SavorySweet | 1 | 1 | 0  | 4 | 1   | E |
| 53109210 | Cake, cupcake, not chocolate, with icing or filling, lowfat, cholesterol free              | 9000_SavorySweet | 1 | 1 | 0  | 4 | 2   | E |
| 53109250 | Cake, cupcake, not chocolate, with fruit and cream filling                                 | 9000_SavorySweet | 1 | 1 | 0  | 4 | 1.5 | E |
| 53114200 | Cake, lemon, lowfat, without icing                                                         | 9000_SavorySweet | 1 | 1 | 0  | 4 | 1.5 | E |
| 53114250 | Cake, lemon, lowfat, with icing                                                            | 9000_SavorySweet | 1 | 1 | 0  | 4 | 1.5 | E |
| 53116000 | Cake, pound, without icing or filling                                                      | 9000_SavorySweet | 1 | 1 | 0  | 4 | 1.5 | E |
| 53116020 | Cake, pound, with icing or filling                                                         | 9000_SavorySweet | 1 | 1 | 0  | 4 | 1   | E |
| 53116380 | Cake, pound, fat free, cholesterol free                                                    | 9000_SavorySweet | 1 | 1 | 0  | 4 | 2   | D |

|          |                                                                       |                  |   |   |   |   |     |   |
|----------|-----------------------------------------------------------------------|------------------|---|---|---|---|-----|---|
| 53116390 | Cake, pound, reduced fat, cholesterol free                            | 9000_SavorySweet | 1 | 1 | 0 | 4 | 2   | D |
| 53118100 | Cake, sponge, without icing or filling                                | 9000_SavorySweet | 1 | 1 | 0 | 4 | 1.5 | E |
| 53118200 | Cake, sponge, with icing or filling                                   | 9000_SavorySweet | 1 | 1 | 0 | 4 | 1   | E |
| 53118300 | Cake, sponge, chocolate                                               | 9000_SavorySweet | 1 | 1 | 0 | 4 | 1   | E |
| 53118410 | Rum cake, without icing                                               | 9000_SavorySweet | 1 | 1 | 0 | 4 | 1.5 | E |
| 53123070 | Cake, shortcake, sponge type, with whipped cream and fruit            | 9000_SavorySweet | 1 | 1 | 0 | 4 | 2   | D |
| 53123080 | Cake, shortcake, sponge type, with fruit                              | 9000_SavorySweet | 1 | 1 | 0 | 4 | 2   | D |
| 53206100 | Cookie, chocolate chip sandwich                                       | 9000_SavorySweet | 1 | 1 | 0 | 4 | 1   | E |
| 53207050 | Cookie, chocolate, with chocolate filling or coating, fat free        | 9000_SavorySweet | 1 | 1 | 0 | 4 | 1.5 | E |
| 53209005 | Cookie, chocolate, with icing or coating                              | 9000_SavorySweet | 1 | 1 | 0 | 4 | 0.5 | E |
| 53222010 | Cookie, fortune                                                       | 9000_SavorySweet | 1 | 1 | 0 | 4 | 2   | D |
| 53222100 | Cookie, cone shell, ice cream type, brown sugar                       | 9000_SavorySweet | 1 | 1 | 0 | 4 | 2   | D |
| 53228000 | Cookie, meringue                                                      | 9000_SavorySweet | 1 | 1 | 0 | 2 | 0.5 | E |
| 53239010 | Cookie, shortbread, reduced fat                                       | 9000_SavorySweet | 1 | 1 | 0 | 4 | 1.5 | E |
| 53240010 | Cookie, animal, with frosting or icing                                | 9000_SavorySweet | 1 | 1 | 0 | 4 | 0.5 | E |
| 53241500 | Cookie, butter or sugar                                               | 9000_SavorySweet | 1 | 1 | 0 | 4 | 1   | E |
| 53243050 | Cookie, vanilla sandwich, reduced fat                                 | 9000_SavorySweet | 1 | 1 | 0 | 4 | 1.5 | E |
| 53244010 | Cookie, butter or sugar, with chocolate icing or filling              | 9000_SavorySweet | 1 | 1 | 0 | 4 | 0.5 | E |
| 53244020 | Cookie, butter or sugar, with icing or filling other than chocolate   | 9000_SavorySweet | 1 | 1 | 0 | 4 | 1   | E |
| 53246000 | Cookie, tea, Japanese                                                 | 9000_SavorySweet | 1 | 1 | 0 | 4 | 2   | D |
| 53260150 | Cookie, lemon wafer, lowfat                                           | 9000_SavorySweet | 1 | 1 | 0 | 4 | 2   | D |
| 53343000 | Pie, coconut cream                                                    | 9000_SavorySweet | 1 | 1 | 0 | 4 | 2   | D |
| 53420200 | Cream puff, eclair, custard or cream filled, iced                     | 9000_SavorySweet | 1 | 1 | 0 | 4 | 1.5 | E |
| 53511500 | Danish pastry, with cheese, fat free, cholesterol free                | 9000_SavorySweet | 1 | 1 | 0 | 4 | 2   | D |
| 53520510 | Beignet                                                               | 9000_SavorySweet | 1 | 1 | 0 | 4 | 1   | E |
| 53520700 | French cruller                                                        | 9000_SavorySweet | 1 | 1 | 0 | 4 | 1.5 | E |
| 53521140 | Doughnut, jelly                                                       | 9000_SavorySweet | 1 | 1 | 0 | 4 | 1.5 | E |
| 53530010 | Breakfast tart, lowfat                                                | 9000_SavorySweet | 1 | 1 | 0 | 4 | 3   | C |
| 53610120 | Coffee cake, crumb or quick-bread type, reduced fat, cholesterol free | 9000_SavorySweet | 1 | 1 | 0 | 4 | 1.5 | E |
| 54101010 | Cracker, animal                                                       | 9000_SavorySweet | 1 | 1 | 0 | 4 | 2   | D |
| 54202050 | Crackers, saltine, fat free, low sodium                               | 9000_SavorySweet | 1 | 1 | 0 | 4 | 3   | D |
| 54301200 | Cracker, snack, fat free                                              | 9000_SavorySweet | 1 | 1 | 0 | 4 | 2.5 | D |
| 54325010 | Crackers, saltine, reduced fat                                        | 9000_SavorySweet | 1 | 1 | 0 | 4 | 2.5 | D |
| 54408000 | Pretzels, NFS                                                         | 9000_SavorySweet | 1 | 1 | 0 | 4 | 2   | D |
| 54408010 | Pretzels, hard                                                        | 9000_SavorySweet | 1 | 1 | 0 | 4 | 2   | D |
| 54408015 | Pretzels, hard, NFS                                                   | 9000_SavorySweet | 1 | 1 | 0 | 4 | 2   | D |
| 54408016 | Pretzels, hard, plain, salted                                         | 9000_SavorySweet | 1 | 1 | 0 | 4 | 2   | D |
| 54408017 | Pretzels, hard, plain, lightly salted                                 | 9000_SavorySweet | 1 | 1 | 0 | 4 | 3   | D |

|          |                                                     |                  |   |   |   |   |     |   |
|----------|-----------------------------------------------------|------------------|---|---|---|---|-----|---|
| 54408020 | Pretzels, soft                                      | 9000_SavorySweet | 1 | 1 | 0 | 4 | 3   | C |
| 54408035 | Pretzels, hard, flavored                            | 9000_SavorySweet | 1 | 1 | 0 | 4 | 2   | E |
| 54408040 | Pretzels, soft, unsalted                            | 9000_SavorySweet | 1 | 1 | 0 | 4 | 3.5 | C |
| 54408070 | Pretzels, hard, multigrain                          | 9000_SavorySweet | 1 | 1 | 0 | 4 | 2   | D |
| 54408080 | Pretzel, gluten free                                | 9000_SavorySweet | 1 | 1 | 0 | 4 | 1   | E |
| 54408081 | Pretzels, hard, plain, gluten free                  | 9000_SavorySweet | 1 | 1 | 0 | 4 | 1   | E |
| 54408082 | Pretzels, hard, flavored, gluten free               | 9000_SavorySweet | 1 | 1 | 0 | 4 | 1   | E |
| 54408105 | Pretzel chips, hard, plain                          | 9000_SavorySweet | 1 | 1 | 0 | 4 | 1   | E |
| 54408110 | Pretzel chips, hard, flavored                       | 9000_SavorySweet | 1 | 1 | 0 | 4 | 0.5 | E |
| 54408190 | Pretzels, hard, coated, NFS                         | 9000_SavorySweet | 1 | 1 | 0 | 4 | 1   | E |
| 54408200 | Pretzels, hard, chocolate coated                    | 9000_SavorySweet | 1 | 1 | 0 | 4 | 1   | E |
| 54408210 | Pretzels, hard, white chocolate coated              | 9000_SavorySweet | 1 | 1 | 0 | 4 | 0.5 | E |
| 54408250 | Pretzels, hard, yogurt coated                       | 9000_SavorySweet | 1 | 1 | 0 | 4 | 0.5 | E |
| 54408290 | Pretzels, hard, filled, NFS                         | 9000_SavorySweet | 1 | 1 | 0 | 4 | 0.5 | E |
| 54408300 | Pretzels, hard, cheese filled                       | 9000_SavorySweet | 1 | 1 | 0 | 4 | 0.5 | E |
| 54408400 | Pretzels, soft, NFS                                 | 9000_SavorySweet | 1 | 1 | 0 | 4 | 2   | D |
| 54408405 | Pretzels, soft, ready-to-eat, NFS                   | 9000_SavorySweet | 1 | 1 | 0 | 4 | 2   | D |
| 54408410 | Pretzels, soft, ready-to-eat, salted, buttered      | 9000_SavorySweet | 1 | 1 | 0 | 4 | 2   | D |
| 54408411 | Pretzels, soft, ready-to-eat, unsalted, buttered    | 9000_SavorySweet | 1 | 1 | 0 | 4 | 3.5 | C |
| 54408415 | Pretzels, soft, ready-to-eat, salted, no butter     | 9000_SavorySweet | 1 | 1 | 0 | 4 | 3   | D |
| 54408416 | Pretzels, soft, ready-to-eat, unsalted, no butter   | 9000_SavorySweet | 1 | 1 | 0 | 4 | 3.5 | C |
| 54408420 | Pretzels, soft, ready-to-eat, cinnamon sugar coated | 9000_SavorySweet | 1 | 1 | 0 | 4 | 2.5 | D |
| 54408422 | Pretzels, soft, ready-to-eat, coated or flavored    | 9000_SavorySweet | 1 | 1 | 0 | 4 | 2   | D |
| 54408430 | Pretzels, soft, ready-to-eat, topped with meat      | 9000_SavorySweet | 1 | 1 | 0 | 4 | 3   | D |
| 54408456 | Pretzels, soft, from frozen, unsalted               | 9000_SavorySweet | 1 | 1 | 0 | 4 | 3.5 | C |
| 91101000 | Sugar, NFS                                          | 9000_SavorySweet | 1 | 1 | 0 | 2 | 0.5 | E |
| 91101010 | Sugar, white, granulated or lump                    | 9000_SavorySweet | 1 | 1 | 0 | 2 | 0.5 | E |
| 91101020 | Sugar, white, confectioner's, powdered              | 9000_SavorySweet | 1 | 1 | 0 | 2 | 0.5 | E |
| 91105010 | Fructose sweetener, sugar substitute, dry powder    | 9000_SavorySweet | 1 | 1 | 0 | 4 | 0.5 | E |
| 91106000 | Sugar substitute, sugar-aspartame blend, dry powder | 9000_SavorySweet | 1 | 1 | 0 | 4 | 0.5 | E |
| 91106010 | Sugar substitute and sugar blend                    | 9000_SavorySweet | 1 | 1 | 0 | 4 | 0.5 | E |
| 91107000 | Sugar substitute, sucralose, powder                 | 9000_SavorySweet | 1 | 1 | 0 | 4 | 1   | E |
| 91200000 | Sugar substitute, powder, NFS                       | 9000_SavorySweet | 1 | 1 | 0 | 4 | 0.5 | E |
| 91200020 | Sugar substitute, saccharin-based, dry powder       | 9000_SavorySweet | 1 | 1 | 0 | 4 | 0.5 | E |
| 91200030 | Brown sugar substitute, saccharin-based, dry powder | 9000_SavorySweet | 1 | 1 | 0 | 4 | 0.5 | E |
| 91200040 | Sugar substitute, saccharin, powder                 | 9000_SavorySweet | 1 | 1 | 0 | 4 | 0.5 | E |
| 91200110 | Sugar substitute, saccharin, liquid                 | 9000_SavorySweet | 1 | 1 | 0 | 4 | 3.5 | A |
| 91201010 | Sugar substitute, aspartame, powder                 | 9000_SavorySweet | 1 | 1 | 0 | 4 | 1   | E |
| 91300010 | Syrup, NFS                                          | 9000_SavorySweet | 1 | 1 | 0 | 4 | 2   | D |

|          |                                                 |                  |   |   |   |   |     |   |
|----------|-------------------------------------------------|------------------|---|---|---|---|-----|---|
| 91300100 | Pancake syrup                                   | 9000_SavorySweet | 1 | 1 | 0 | 4 | 2   | D |
| 91301020 | Cane and corn pancake syrup                     | 9000_SavorySweet | 1 | 1 | 0 | 4 | 2.5 | C |
| 91301030 | Corn syrup                                      | 9000_SavorySweet | 1 | 1 | 0 | 4 | 1   | D |
| 91301040 | Buttered blends syrup                           | 9000_SavorySweet | 1 | 1 | 0 | 4 | 1   | E |
| 91301050 | Blueberry syrup                                 | 9000_SavorySweet | 1 | 1 | 0 | 4 | 1.5 | E |
| 91301080 | Chocolate syrup                                 | 9000_SavorySweet | 1 | 1 | 0 | 4 | 1.5 | E |
| 91301081 | Chocolate syrup, light                          | 9000_SavorySweet | 1 | 1 | 0 | 4 | 2.5 | C |
| 91301100 | Simple syrup                                    | 9000_SavorySweet | 1 | 1 | 0 | 2 | 2   | D |
| 91301130 | Strawberry drink syrup                          | 9000_SavorySweet | 1 | 1 | 0 | 4 | 1.5 | D |
| 91301250 | Maple and corn and/or cane pancake syrup blends | 9000_SavorySweet | 1 | 1 | 0 | 4 | 2   | D |
| 91301510 | Pancake syrup, light                            | 9000_SavorySweet | 1 | 1 | 0 | 4 | 2.5 | D |
| 91304010 | Topping, butterscotch or caramel                | 9000_SavorySweet | 1 | 1 | 0 | 4 | 1.5 | E |
| 91304040 | Topping, marshmallow                            | 9000_SavorySweet | 1 | 1 | 0 | 4 | 2   | D |
| 91304050 | Hard sauce                                      | 9000_SavorySweet | 1 | 1 | 0 | 4 | 0.5 | E |
| 91305020 | Icing, white                                    | 9000_SavorySweet | 1 | 1 | 0 | 4 | 1   | E |
| 91306020 | Caramel dip, regular                            | 9000_SavorySweet | 1 | 1 | 0 | 4 | 0.5 | E |
| 91306025 | Caramel dip, light                              | 9000_SavorySweet | 1 | 1 | 0 | 4 | 1.5 | E |
| 91361040 | Dessert sauce                                   | 9000_SavorySweet | 1 | 1 | 0 | 2 | 2.5 | D |
| 91501010 | Gelatin dessert                                 | 9000_SavorySweet | 1 | 1 | 0 | 4 | 3   | C |
| 91501015 | Gelatin snacks                                  | 9000_SavorySweet | 1 | 1 | 0 | 4 | 2.5 | D |
| 91501020 | Gelatin dessert with fruit                      | 9000_SavorySweet | 1 | 1 | 0 | 4 | 3.5 | C |
| 91501030 | Gelatin dessert with whipped cream              | 9000_SavorySweet | 1 | 1 | 0 | 4 | 3   | C |
| 91501050 | Gelatin dessert with cream cheese               | 9000_SavorySweet | 1 | 1 | 0 | 4 | 3   | C |
| 91511010 | Gelatin dessert, sugar free                     | 9000_SavorySweet | 1 | 1 | 0 | 4 | 3.5 | A |
| 91601000 | Italian Ice                                     | 9000_SavorySweet | 1 | 1 | 0 | 4 | 2.5 | C |
| 91610900 | Popsicle, NFS                                   | 9000_SavorySweet | 1 | 1 | 0 | 4 | 3   | C |
| 91611000 | Popsicle                                        | 9000_SavorySweet | 1 | 1 | 0 | 4 | 3   | C |
| 91612000 | Freezer pop                                     | 9000_SavorySweet | 1 | 1 | 0 | 4 | 3   | C |
| 91621000 | Snow cone                                       | 9000_SavorySweet | 1 | 1 | 0 | 4 | 2.5 | C |
| 91700010 | Candy, NFS                                      | 9000_SavorySweet | 1 | 1 | 0 | 4 | 1.5 | E |
| 91702010 | Butterscotch morsels                            | 9000_SavorySweet | 1 | 1 | 0 | 4 | 0.5 | E |
| 91703010 | Caramel, chocolate-flavored roll                | 9000_SavorySweet | 1 | 1 | 0 | 4 | 1.5 | E |
| 91703020 | Caramel, flavor other than chocolate            | 9000_SavorySweet | 1 | 1 | 0 | 4 | 1   | E |
| 91703070 | Rolo                                            | 9000_SavorySweet | 1 | 1 | 0 | 4 | 0.5 | E |
| 91703200 | TWIX Caramel Cookie Bars                        | 9000_SavorySweet | 1 | 1 | 0 | 4 | 0.5 | E |
| 91707000 | Fondant                                         | 9000_SavorySweet | 1 | 1 | 0 | 4 | 0.5 | E |
| 91708000 | Fruit peel, candied                             | 9000_SavorySweet | 1 | 1 | 0 | 4 | 1   | E |
| 91708030 | Fruit leather and fruit snacks candy            | 9000_SavorySweet | 1 | 1 | 0 | 4 | 1.5 | E |
| 91708040 | Fun Fruits Creme Supremes                       | 9000_SavorySweet | 1 | 1 | 0 | 4 | 0.5 | E |

|          |                                         |                  |   |   |   |   |     |   |
|----------|-----------------------------------------|------------------|---|---|---|---|-----|---|
| 91708070 | Tamarind candy                          | 9000_SavorySweet | 1 | 1 | 0 | 4 | 0.5 | E |
| 91708100 | Fruit snacks candy, with high vitamin C | 9000_SavorySweet | 1 | 1 | 0 | 4 | 1   | E |
| 91709000 | Gumdrops, chocolate covered             | 9000_SavorySweet | 1 | 1 | 0 | 4 | 1   | E |
| 91713070 | Fudge, vanilla                          | 9000_SavorySweet | 1 | 1 | 0 | 4 | 0.5 | E |
| 91715300 | 100 GRAND Bar                           | 9000_SavorySweet | 1 | 1 | 0 | 4 | 0.5 | E |
| 91721000 | Licorice                                | 9000_SavorySweet | 1 | 1 | 0 | 4 | 1   | E |
| 91723000 | Marshmallow                             | 9000_SavorySweet | 1 | 1 | 0 | 4 | 1.5 | D |
| 91723020 | Marshmallow, candy-coated               | 9000_SavorySweet | 1 | 1 | 0 | 4 | 1   | E |
| 91723050 | Marshmallow, coconut-coated             | 9000_SavorySweet | 1 | 1 | 0 | 4 | 1   | E |
| 91726110 | Nougat, with caramel, chocolate covered | 9000_SavorySweet | 1 | 1 | 0 | 4 | 0.5 | E |
| 91726130 | MILKY WAY Bar                           | 9000_SavorySweet | 1 | 1 | 0 | 4 | 0.5 | E |
| 91726420 | 3 MUSKETEERS Bar                        | 9000_SavorySweet | 1 | 1 | 0 | 4 | 0.5 | E |
| 91745010 | Gumdrops                                | 9000_SavorySweet | 1 | 1 | 0 | 4 | 1.5 | E |
| 91745020 | Hard candy                              | 9000_SavorySweet | 1 | 1 | 0 | 4 | 1.5 | E |
| 91745040 | Butterscotch hard candy                 | 9000_SavorySweet | 1 | 1 | 0 | 4 | 0.5 | E |
| 91745100 | Skittles                                | 9000_SavorySweet | 1 | 1 | 0 | 4 | 0.5 | E |
| 91746200 | M&M's Pretzel Chocolate Candies         | 9000_SavorySweet | 1 | 1 | 0 | 4 | 0.5 | E |
| 91750000 | Taffy                                   | 9000_SavorySweet | 1 | 1 | 0 | 4 | 0.5 | E |
| 91760000 | Toffee, plain                           | 9000_SavorySweet | 1 | 1 | 0 | 4 | 1   | E |
| 91760100 | Toffee, chocolate covered               | 9000_SavorySweet | 1 | 1 | 0 | 4 | 0.5 | E |
| 91760700 | Wax candy, liquid filled                | 9000_SavorySweet | 1 | 1 | 0 | 4 | 2.5 | C |
| 91770000 | Dietetic or low calorie candy, NFS      | 9000_SavorySweet | 1 | 1 | 0 | 4 | 3   | C |
| 91770010 | Dietetic or low calorie gumdrops        | 9000_SavorySweet | 1 | 1 | 0 | 4 | 1   | E |
| 91770020 | Dietetic or low calorie hard candy      | 9000_SavorySweet | 1 | 1 | 0 | 4 | 3   | C |
| 91770050 | Dietetic or low calorie mints           | 9000_SavorySweet | 1 | 1 | 0 | 4 | 3   | C |

<sup>a</sup>non-integer NOVA scores for mixed dishes have been rounded to the nearest whole number

HSR Health Star Rating; FCS Food Compass Score; NS Not specified; NFS Not further specified
